# Supplementary material for: ALKBH7 mediates necrosis via rewiring of glyoxal metabolism
Source: eLife journal article supplement (doi:10.7554/elife.58573), 2020-08-14
Supplement: supp [file elife-58573-supp-v1.zip]

Archive with 19 entries (19 files):
- elife_poa_e58573_Transparent_Reporting_File.pdf
- elife_poa_e58573_Supplementary_file_1.docx
- elife_poa_e58573_Figure_1_figure_supplement_1.jpg
- elife_poa_e58573_Figure_1_figure_supplement_2.jpg
- elife_poa_e58573_Figure_2_figure_supplement_1.jpg
- elife_poa_e58573_Figure_2_figure_supplement_2.jpg
- elife_poa_e58573_Figure_3_figure_supplement_3.jpg
- elife_poa_e58573_Figure_4_figure_supplement_1.jpg
- elife_poa_e58573_Figure_4_figure_supplement_2.jpg
- elife_poa_e58573_Figure_5_figure_supplement_1.jpg
- elife_poa_e58573_Figure_5_figure_supplement_2.jpg
- elife_poa_e58573_Figure_5_figure_supplement_3.jpg
- elife_poa_e58573_Figure_6_figure_supplement_1.jpg
- elife_poa_e58573_Source_data_1.xlsx
- elife_poa_e58573_Source_data_2.xlsx
- elife_poa_e58573_Source_data_3.xlsx
- elife_poa_e58573_Source_data_4.xlsx
- elife_poa_e58573_Source_data_5.xlsx
- elife_poa_e58573_Source_data_6.xlsx
