# Supplementary material for: ALKBH7 mediates necrosis via rewiring of glyoxal metabolism
Source: eLife journal article supplement (doi:10.7554/elife.58573), 2020-08-14
Supplement: supp [file elife-58573-supp-v1.zip › elife_poa_e58573_Source_data_1.xlsx]

## Sheet: P-OH Promx Raw
Complete RAW data set for hydroxyproline containing peptides (used to generate data for Figure 1A)
A = knockout, B = wild-type
Confidence	Master Protein Descriptions	Annotated Sequence	Modifications (Red peptide groups have proline oxidation)	Modifications in Master Proteins	Qvality PEP	Qvality q-value	# Protein Groups	# Proteins	# PSMs	Master Protein Accessions	Positions in Master Proteins	# Missed Cleavages	Theo. MH+ [Da]	# Razor Quan Results	Abundances (Grouped): Group B	Abundances (Grouped): Group A	Abundances (Grouped) CV [%]: Group B	Abundances (Grouped) CV [%]: Group A	Quan Info	Found in Sample: [S11] F2: 126, Sample, n/a, Group B	Found in Sample: [S14] F2: 128N, Sample, n/a, Group B	Found in Sample: [S15] F2: 128C, Sample, n/a, Group B	Found in Sample: [S18] F2: 130N, Sample, n/a, Group B	Found in Sample: [S21] F2: 131C, Sample, n/a, Group B	Found in Sample: [S12] F2: 127N, Sample, n/a, Group A	Found in Sample: [S13] F2: 127C, Sample, n/a, Group A	Found in Sample: [S16] F2: 129N, Sample, n/a, Group A	Found in Sample: [S17] F2: 129C, Sample, n/a, Group A	Found in Sample: [S20] F2: 131N, Sample, n/a, Group A	Confidence (by Search Engine): Mascot	Confidence (by Search Engine): Sequest HT	DeltaM [ppm] (by Search Engine): Mascot	DeltaM [ppm] (by Search Engine): Sequest HT	Percolator q-Value (by Search Engine): Mascot	Percolator q-Value (by Search Engine): Sequest HT	Percolator PEP (by Search Engine): Mascot	Percolator PEP (by Search Engine): Sequest HT	XCorr (by Search Engine): Sequest HT	Ions Score (by Search Engine): Mascot	Abundances (Normalized): F2: 126, Sample, n/a, Group B	Abundances (Normalized): F2: 128N, Sample, n/a, Group B	Abundances (Normalized): F2: 128C, Sample, n/a, Group B	Abundances (Normalized): F2: 130N, Sample, n/a, Group B	Abundances (Normalized): F2: 131C, Sample, n/a, Group B	Abundances (Normalized): F2: 127N, Sample, n/a, Group A	Abundances (Normalized): F2: 127C, Sample, n/a, Group A	Abundances (Normalized): F2: 129N, Sample, n/a, Group A	Abundances (Normalized): F2: 129C, Sample, n/a, Group A	Abundances (Normalized): F2: 131N, Sample, n/a, Group A
Medium	1-phosphatidylinositol 4,5-bisphosphate phosphodiesterase delta-1 OS=Mus musculus OX=10090 GN=Plcd1 PE=1 SV=2	[R].NTLDLIAPSPADVQHWVQGLR.[K]	1xOxidation [P8]; 1xTMT6plex [N-Term]	Q8R3B1 1xOxidation [P113]	0.505526	0.0487559	1	3	3	Q8R3B1	Q8R3B1 [106-126]	0	2575.38	0	72.2	60.4	7.69	6.52		Medium	Medium	Medium	Medium	Medium	Medium	Medium	Medium	Medium	Medium	Medium	Medium	-4.93	-4.93	0.01573	0.03639	0.2145	0.4105	2.41	16	71	81.8	72.1	72.3	78.4	61.8	60.4	58.8	69.1	60.4
Medium	1-phosphatidylinositol 4,5-bisphosphate phosphodiesterase zeta-1 OS=Mus musculus OX=10090 GN=Plcz1 PE=1 SV=1	[R].VVKNNAFSPK.[W]	2xDeamidated [N4; N5]; 1xOxidation [P9]; 2xTMT6plex [K3; K10]; 1xTMT6plex [N-Term]	Q8K4D7 1xOxidation [P571]	0.469337	0.0439648	1	2	2	Q8K4D7	Q8K4D7 [563-572]	1	1809.07	0	419.3	473.7	5.1	5.58		Medium	Medium	Medium	Medium	Medium	Medium	Medium	Medium	Medium	Medium	n/a	Medium		-1.38		0.01538		0.2091	2.5		424	394.9	452.2	414.7	412.2	475.6	441	421.5	473.7	478.8
High	28S ribosomal protein S18b, mitochondrial OS=Mus musculus OX=10090 GN=Mrps18b PE=1 SV=1	[R].LYQGNLLEESGPPPESMPEMPTTPPAESSIEQPGSQSA.[-]	1xOxidation [P12]; 1xTMT6plex [N-Term]	Q99N84 1xOxidation [P228]	2.46597e-06	0	1	3	2	Q99N84	Q99N84 [217-254]	0	4227.98	0	8.7	7.7	22.47	28.12		High	High	High	High	High	High	High	High	High	High	High	High	-1.53	-1.53	0	0	2.358e-07	3.441e-05	4.66	37	11.4	10	8.4	8.9	6.8	7.7	11.3	6.1	5.8	8.3
High	28S ribosomal protein S30, mitochondrial OS=Mus musculus OX=10090 GN=Mrps30 PE=1 SV=1	[R].TLVNLLAPLNPVLSTAALDCK.[R]	1xCarbamidomethyl [C20]; 1xOxidation [P11]; 1xTMT6plex [K21]; 1xTMT6plex [N-Term]	Q9D0G0 1xOxidation [P187]	0.00305075	0.000252531	1	1	2	Q9D0G0	Q9D0G0 [177-197]	0	2697.56	0					No Quan Values	High	High	High	High	High	High	High	High	High	High	High	High	1.84	1.84	6.197e-05	0.000346	0.0006729	0.004787	2.59	13
High	2-oxoglutarate dehydrogenase, mitochondrial OS=Mus musculus OX=10090 GN=Ogdh PE=1 SV=3	[R].FGLEGCEVLIPALK.[T]	1xCarbamidomethyl [C6]; 1xOxidation [P11]; 1xTMT6plex [K14]; 1xTMT6plex [N-Term]	Q60597 1xOxidation [P288]	0.000544969	0	1	5	7	Q60597	Q60597 [278-291]	0	2020.16	0	1576.2	1606.1	6.96	7.14		High	High	High	High	High	High	High	High	High	High	High	High	-0.76	-13.59	0	0.0004588	9.906e-05	0.006281	3.04	12	1532.8	1620.9	1484.2	1733.8	1646.8	1661.9	1680.5	1606.1	1417.9	1496.4
Medium	2-oxoglutarate dehydrogenase, mitochondrial OS=Mus musculus OX=10090 GN=Ogdh PE=1 SV=3	[K].YPNAELAWCQEEHK.[N]	1xCarbamidomethyl [C9]; 1xOxidation [P2]; 1xTMT6plex [K14]; 1xTMT6plex [N-Term]	Q60597 1xOxidation [P949]	0.250691	0.0187429	1	5	8	Q60597	Q60597 [948-961]	0	2249.11	0	753.1	772.5	5.36	2.87		High	High	High	High	High	High	High	High	High	High	High	High	1.35	-1.07	0.005843	0.008693	0.09746	0.1336	2.74	8	777.9	722.5	793.8	736.6	686.7	739.1	786.1	772.5	798.3	769.4
High	2-oxoglutarate dehydrogenase, mitochondrial OS=Mus musculus OX=10090 GN=Ogdh PE=1 SV=3	[R].NGHNEMDEPMFTQPLMYK.[Q]	1xDeamidated [N]; 1xOxidation [P/M]; 1xTMT6plex [K18]; 1xTMT6plex [N-Term]	Q60597 1xOxidation [P]	3.05947e-08	0	1	5	99	Q60597	Q60597 [511-528]	0	2657.24	0	5454.2	5206.3	5.27	5.38		High	High	High	High	High	High	High	High	High	High	High	High	2.03	2.9	0	0	4.973e-05	4.581e-07	6.34	3	5476.4	5568	5160.7	5432.1	5715.7	4939.3	5206.3	5228	5291.6	4637.9
High	2-oxoglutarate dehydrogenase, mitochondrial OS=Mus musculus OX=10090 GN=Ogdh PE=1 SV=3	[R].RNGHNEMDEPMFTQPLMYK.[Q]	1xDeamidated [N]; 2xOxidation [P/M]; 1xTMT6plex [K19]; 1xTMT6plex [N-Term]	Q60597 2xOxidation [P]	0.0270028	0.00124455	1	5	4	Q60597	Q60597 [510-528]	1	2829.34	0	185.6	199.5	5.29	9.37		High	High	High	High	High	High	High	High	High	High	High	High	0.81	1.63	0.0006084	0.00392	0.01077	0.05277	4.41	3	185.6	189.4	170.1	175.8	197.4	174.8	178.8	199.5	207.4	217.4
High	2-oxoglutarate dehydrogenase, mitochondrial OS=Mus musculus OX=10090 GN=Ogdh PE=1 SV=3	[K].TIIDMSSANGVDYVIMGMPHRGR.[L]	1xDeamidated [N9]; 1xOxidation [P19]; 1xTMT6plex [N-Term]	Q60597 1xOxidation [P310]	0.00567819	0.000414721	1	5	2	Q60597	Q60597 [292-314]	1	2766.36	0	168.8	157.2	7.89	8.47		High	High	High	High	High	High	High	High	High	High	High	Low	14.93	13.56	0.0001257	0.1288	0.001342	1	4.08	28	175	165.2	172.4	141.4	158.2	177.3	181.6	157.2	150.4	156.2
High	2-oxoglutarate dehydrogenase, mitochondrial OS=Mus musculus OX=10090 GN=Ogdh PE=1 SV=3	[K].TIIDMSSANGVDYVIMGMPHRGR.[L]	1xDeamidated [N9]; 2xOxidation [P19; M]; 1xTMT6plex [N-Term]	Q60597 2xOxidation [P310; ]	0.0362468	0.00213126	1	5	3	Q60597	Q60597 [292-314]	1	2782.35	0	113.7	106.8	13.98	3.22		High	High	High	High	High	High	High	High	High	High	High	Low	14.77	14.01	0.0006127	0.3414	0.0108	1	4.65	17	136.5	115.6	120.9	92.7	111.9	100.3	108.4	103.2	107.4	106.8
High	2-oxoglutarate dehydrogenase, mitochondrial OS=Mus musculus OX=10090 GN=Ogdh PE=1 SV=3	[K].HWLDSPWPGFFTLDGQPR.[S]	2xOxidation [P6; P8]; 1xTMT6plex [N-Term]	Q60597 2xOxidation [P588; P590]	0.000404163	0	1	5	2	Q60597	Q60597 [583-600]	0	2417.19	0	52.9	58.9	12.23	8.88		High	High	High	High	High	High	High	High	High	High	High	High	2.09	2.09	0	1.196e-05	7.107e-05	0.0001211	4.91	31	50.2	52.1	64.5	46.6	53.7	50.3	58.9	51	60.9	58.9
High	39S ribosomal protein L10, mitochondrial OS=Mus musculus OX=10090 GN=Mrpl10 PE=1 SV=2	[K].SVPFLPLLGGCVDDTILSR.[Q]	1xCarbamidomethyl [C11]; 1xOxidation [P6]; 1xTMT6plex [N-Term]	Q3TBW2 1xOxidation [P175]	0.00961886	0.000500778	1	1	1	Q3TBW2	Q3TBW2 [170-188]	0	2304.25	0	21.2	26.7	22.21	20.27		High	High	High	High	High	High	High	High	High	High	n/a	High		-0.38		0.0001156		0.001541	2.61		14.2	25.6	21.6	20.3	28.3	28.3	20.1	17.9	28.3	26.7
High	39S ribosomal protein L12, mitochondrial OS=Mus musculus OX=10090 GN=Mrpl12 PE=1 SV=2	[K].IQDVGLMPMGGMVPGPVSAAAPASEAAEEEDVPK.[Q]	2xOxidation [P/M]; 1xTMT6plex [K34]; 1xTMT6plex [N-Term]	Q9DB15 2xOxidation [P]	3.06006e-09	0	1	1	16	Q9DB15	Q9DB15 [93-126]	0	3840.91	0	473.2	508.7	7.98	9.62		High	High	High	High	High	High	High	High	High	High	High	High	0.75	2.62	0	0	4.5e-07	8.306e-08	6.83	26	490.5	439.1	523.6	422	458.4	508.7	543.2	428.1	460.1	523.2
Medium	39S ribosomal protein L40, mitochondrial OS=Mus musculus OX=10090 GN=Mrpl40 PE=1 SV=2	[R].ASLLAFWDLIPMRAEPLR.[K]	3xOxidation [P11; M12; P16]; 1xTMT6plex [N-Term]	Q9Z2Q5 3xOxidation [P44; P49; ]	0.20581	0.0149527	1	1	8	Q9Z2Q5	Q9Z2Q5 [34-51]	1	2376.29	0	176.7	200	45.58	6.43		High	High	High	High	High	High	High	High	High	High	High	Medium	-3.44	-1.52	0.004528	0.04545	0.07719	0.5123	4.38	8	397.5	150.6	195.2	141.4	160	191.1	184.5	200	217.6	205.3
High	3-ketoacyl-CoA thiolase, mitochondrial OS=Mus musculus OX=10090 GN=Acaa2 PE=1 SV=3	[K].LPMGMTAENLAAK.[Y]	2xOxidation [P/M]; 1xTMT6plex [K13]; 1xTMT6plex [N-Term]	Q8BWT1 2xOxidation [P]	3.29507e-05	0	1	1	150	Q8BWT1	Q8BWT1 [159-171]	0	1837	0	7316.4	6907.3	3.51	8.64		High	High	High	High	High	High	High	High	High	High	High	High	-0.66	0.15	0	0	0.0001121	1.702e-05	5.82	13	7239.2	7075.6	7464.7	7394.4	7190.5	6472.8	6990.6	6528.2	7972.2	6907.3
High	40S ribosomal protein S17 OS=Mus musculus OX=10090 GN=Rps17 PE=1 SV=2	[R].DNYVPEVSALDQEIIEVDPDTK.[E]	1xDeamidated [Q12]; 1xOxidation [P19]; 1xTMT6plex [K22]; 1xTMT6plex [N-Term]	P63276 1xOxidation [P100]	0.0575692	0.00422801	1	1	2	P63276	P63276 [82-103]	0	2964.5	0					No Quan Values	High	High	High	High	High	High	High	High	High	High	High	Medium	14.9	14.9	0.001215	0.0102	0.01822	0.1558	2.24	3
Medium	40S ribosomal protein S23 OS=Mus musculus OX=10090 GN=Rps23 PE=1 SV=3	[K].QPNSAIR.[K]	1xDeamidated [N3]; 1xOxidation [P2]; 1xTMT6plex [N-Term]	P62267 1xOxidation [P62]	0.480296	0.0454933	1	1	1	P62267	P62267 [61-67]	0	1031.57	0					No Quan Values	Medium	Medium	Medium	Medium	Medium	Medium	Medium	Medium	Medium	Medium	n/a	Medium		-1.81		0.01611		0.2157	2.19
High	40S ribosomal protein S23 OS=Mus musculus OX=10090 GN=Rps23 PE=1 SV=3	[K].QPNSAIR.[K]	1xOxidation [P2]; 1xTMT6plex [N-Term]	P62267 1xOxidation [P62]	0.0978379	0.00704049	1	1	2	P62267	P62267 [61-67]	0	1030.58	0	99.7	120.1	7.02	15.77		High	High	High	High	High	High	High	High	High	High	n/a	High		-0.48		0.001895		0.02543	2.28		94.1	100	99.4	114.2	96	144.2	152.3	118.8	103.1	120.1
Medium	4-hydroxyphenylpyruvate dioxygenase-like protein OS=Mus musculus OX=10090 GN=Hpdl PE=2 SV=1	[R].DLHRVFGFQPLAVR.[E]	1xDeamidated [Q9]; 1xOxidation [P10]; 1xTMT6plex [N-Term]	Q8K248 1xOxidation [P33]	0.25242	0.0189251	1	1	3	Q8K248	Q8K248 [24-37]	1	1901.06	2	1016.8	1018.5	4.14	1.67		High	High	High	High	High	High	High	High	High	High	High	n/a	-2.17		0.005892		0.09854			2	1022.8	1062.2	1010.9	956.2	1055.1	1018.5	1042.7	1001.7	1001.1	1020
High	5-oxoprolinase OS=Mus musculus OX=10090 GN=Oplah PE=1 SV=1	[R].LLPASFPCIFGPGEDQPLSPEASR.[K]	1xCarbamidomethyl [C8]; 1xDeamidated [Q16]; 1xOxidation [P12]; 1xTMT6plex [N-Term]	Q8K010 1xOxidation [P412]	0.0235884	0.00107996	1	2	2	Q8K010	Q8K010 [401-424]	0	2831.41	0	28.7	23.8	21.25	34.41		High	High	High	High	High	High	High	High	High	High	High	High	13.84	13.84	0.0003176	0.0003281	0.006623	0.004583	4	29	22	34.6	33.1	21.3	32.6	45.5	22.3	23.5	26.5	23.8
High	5-oxoprolinase OS=Mus musculus OX=10090 GN=Oplah PE=1 SV=1	[R].LLPASFPCIFGPGEDQPLSPEASR.[K]	1xCarbamidomethyl [C8]; 1xOxidation [P7]; 1xTMT6plex [N-Term]	Q8K010 1xOxidation [P407]	2.73338e-06	0	1	2	2	Q8K010	Q8K010 [401-424]	0	2830.43	0	25.9	25.7	10.56	9.69		High	High	High	High	High	High	High	High	High	High	High	High	1.65	1.65	0	0	2.627e-07	6.033e-06	5.89	50	27.8	26.5	25.4	20.7	23	25.9	24.8	26.7	25.7	20.6
High	60 kDa heat shock protein, mitochondrial OS=Mus musculus OX=10090 GN=Hspd1 PE=1 SV=1	[R].CIPALDSLKPANEDQK.[I]	1xCarbamidomethyl [C1]; 1xOxidation [P3]; 2xTMT6plex [K9; K16]; 1xTMT6plex [N-Term]	P63038 1xOxidation [P449]	0.010073	0.000520251	1	2	6	P63038	P63038 [447-462]	0	2502.38	0	1016.8	885.8	7.49	3.82		High	High	High	High	High	High	High	High	High	High	High	High	0.62	3.12	0.005208	0.001453	0.08748	0.02067	3.62	13	886.8	1001.5	1050.7	1032.3	905.3	876.6	876.3	915.2	957	885.8
High	60 kDa heat shock protein, mitochondrial OS=Mus musculus OX=10090 GN=Hspd1 PE=1 SV=1	[R].TVIIEQSWGSPK.[V]	1xOxidation [P11]; 1xTMT6plex [K12]; 1xTMT6plex [N-Term]	P63038 1xOxidation [P71]	0.0170046	0.000799344	1	3	2	P63038	P63038 [61-72]	0	1819.04	0					No Quan Values	High	High	High	High	High	High	High	High	High	High	High	High	0.54	0.54	0.0002427	0.000358	0.004593	0.005133	2.47	5
Medium	60 kDa heat shock protein, mitochondrial OS=Mus musculus OX=10090 GN=Hspd1 PE=1 SV=1	[R].ALAPHLTR.[A]	1xOxidation [P4]; 1xTMT6plex [N-Term]	P63038 1xOxidation [P20]	0.14929	0.0107929	1	3	2	P63038	P63038 [17-24]	0	1123.68	0	462.3	467.4	10.15	4.39		High	High	High	High	High	High	High	High	High	High	High	High	-0.43	-0.43	0.004846	0.003281	0.08254	0.04315	1.39	0	502.6	462.8	504	409.9	392.7	488.1	456.9	467.4	469.1	432.5
High	60S acidic ribosomal protein P1 OS=Mus musculus OX=10090 GN=Rplp1 PE=1 SV=1	[K].ALANVNIGSLICNVGAGGPAPAAGAAPAGGAAPSTAAAPAEEK.[K]	1xCarbamidomethyl [C12]; 1xDeamidated [N13]; 1xOxidation [P]; 1xTMT6plex [K43]; 1xTMT6plex [N-Term]	P47955 1xOxidation [P]	3.65561e-09	0	1	1	4	P47955	P47955 [50-92]	0	4258.22	0	42.9	49.1	7.93	10.38		High	High	High	High	High	High	High	High	High	High	High	High	4.83	4.83	0	0	2.83e-09	6.997e-09	5.98	32	41.1	47.4	44.7	40.2	41	40.2	41.5	49.1	50.2	49.3
High	60S acidic ribosomal protein P1 OS=Mus musculus OX=10090 GN=Rplp1 PE=1 SV=1	[K].ALANVNIGSLICNVGAGGPAPAAGAAPAGGAAPSTAAAPAEEK.[K]	1xCarbamidomethyl [C12]; 1xOxidation [P]; 1xTMT6plex [K43]; 1xTMT6plex [N-Term]	P47955 1xOxidation [P]	1.46202e-13	0	1	1	6	P47955	P47955 [50-92]	0	4257.23	0	146.7	165	5.72	6.87		High	High	High	High	High	High	High	High	High	High	High	High	-0.56	-0.56	0	0	2.17e-14	1.851e-11	9.39	69	143.4	146.3	147.2	140.1	164.3	165	165.7	157.2	141	167.5
High	60S acidic ribosomal protein P1 OS=Mus musculus OX=10090 GN=Rplp1 PE=1 SV=1	[K].ALANVNIGSLICNVGAGGPAPAAGAAPAGGAAPSTAAAPAEEK.[K]	1xCarbamidomethyl [C12]; 2xDeamidated [N6; N13]; 1xOxidation [P21]; 1xTMT6plex [K43]; 1xTMT6plex [N-Term]	P47955 1xOxidation [P70]	0.0528125	0.00376796	1	1	1	P47955	P47955 [50-92]	0	4259.2	0					No Quan Values	High	High	High	High	High	High	High	High	High	High	n/a	High		7.38		0.0008327		0.01188	3.26
High	60S acidic ribosomal protein P1 OS=Mus musculus OX=10090 GN=Rplp1 PE=1 SV=1	[K].AAGVSVEPFWPGLFAK.[A]	2xOxidation [P8; P11]; 1xTMT6plex [K16]; 1xTMT6plex [N-Term]	P47955 2xOxidation [P41; P44]	0.000505738	0	1	2	2	P47955	P47955 [34-49]	0	2166.2	0	95.1	99.2	9.98	9.89		High	High	High	High	High	High	High	High	High	High	High	High	-0.08	-0.08	0	2.328e-05	9.136e-05	0.0003979	3.26	12	87.2	92.1	103.6	77.9	98.2	113.7	104.2	99.2	94.8	87.4
Medium	A disintegrin and metallopeptidase domain 3 OS=Mus musculus OX=10090 GN=Adam3 PE=1 SV=1	[K].QLASQPELDCLR.[N]	1xCarbamidomethyl [C10]; 1xDeamidated [Q1]; 1xOxidation [P6]; 1xTMT6plex [N-Term]	F8VQ03 1xOxidation [P375]	0.43485	0.0390111	1	1	2	F8VQ03	F8VQ03 [370-381]	0	1675.85	0	85.6	83.9	7.72	9.74		Medium	Medium	Medium	Medium	Medium	Medium	Medium	Medium	Medium	Medium	Medium	Low	13.7	13.7	0.01253	0.1072	0.1818	0.9589	1.73	15	79.7	86	87.8	97.4	85.1	70.9	77	88.4	89.9	83.9
High	Acetyl-CoA acetyltransferase, mitochondrial OS=Mus musculus OX=10090 GN=Acat1 PE=1 SV=1	[R].QATLGAGLPISTPCTTVNK.[V]	1xCarbamidomethyl [C14]; 1xDeamidated [N18]; 1xOxidation [P13]; 1xTMT6plex [K19]; 1xTMT6plex [N-Term]	Q8QZT1 1xOxidation [P115]	0.0079964	0.000443878	1	1	1	Q8QZT1	Q8QZT1 [103-121]	0	2404.32	0	157.6	161.3	3.77	12.71		High	High	High	High	High	High	High	High	High	High	n/a	High		9.16		9.038e-05		0.001237	3.27		155.5	159.4	155.7	149	166.3	140	138.4	168.3	186.5	161.3
High	Acetyl-CoA acetyltransferase, mitochondrial OS=Mus musculus OX=10090 GN=Acat1 PE=1 SV=1	[R].QATLGAGLPISTPCTTVNK.[V]	1xCarbamidomethyl [C14]; 1xOxidation [P]; 1xTMT6plex [K19]; 1xTMT6plex [N-Term]	Q8QZT1 1xOxidation [P]	3.17557e-07	0	1	1	6	Q8QZT1	Q8QZT1 [103-121]	0	2403.33	0	338	336	6.42	5.59		High	High	High	High	High	High	High	High	High	High	High	High	0.13	0.13	0	0	2.362e-08	1.057e-07	5	59	323.1	381.9	338.4	321.4	341.2	345.3	336	313.7	361.1	322.1
High	Acetyl-coenzyme A synthetase 2-like, mitochondrial OS=Mus musculus OX=10090 GN=Acss1 PE=1 SV=1	[K].GNVLEGGDVSGALCISQAWPGMAR.[T]	1xCarbamidomethyl [C14]; 2xOxidation [P20; M22]; 1xTMT6plex [N-Term]	Q99NB1 2xOxidation [P497; ]	1.84566e-08	0	1	1	2	Q99NB1	Q99NB1 [478-501]	0	2706.32	0	37	35.3	11.92	5.38		High	High	High	High	High	High	High	High	High	High	High	High	0.43	0.43	0	0	9.799e-10	1.065e-09	6.26	53	42.8	38.4	42.1	34.7	31.3	35.3	37.2	34.6	32.1	35.6
High	Acetyl-coenzyme A synthetase 2-like, mitochondrial OS=Mus musculus OX=10090 GN=Acss1 PE=1 SV=1	[R].DTLVWDTPYHTVWDCDFR.[T]	1xCarbamidomethyl [C15]; 1xOxidation [P8]; 1xTMT6plex [N-Term]	Q99NB1 1xOxidation [P79]	0.0136483	0.000590294	1	1	1	Q99NB1	Q99NB1 [72-89]	0	2571.18	0					No Quan Values	High	High	High	High	High	High	High	High	High	High	n/a	High		-2.77		0.0001927		0.002342	3.02
High	Acetyl-coenzyme A synthetase 2-like, mitochondrial OS=Mus musculus OX=10090 GN=Acss1 PE=1 SV=1	[R].LPGCVPAAAQPGSYPALSAQAAQEPAAFWGPLAR.[D]	1xCarbamidomethyl [C4]; 1xOxidation [P]; 1xTMT6plex [N-Term]	Q99NB1 1xOxidation [P]	1.29248e-05	0	1	1	4	Q99NB1	Q99NB1 [38-71]	0	3665.87	0	51.5	54.4	16.36	37.85		High	High	High	High	High	High	High	High	High	High	High	High	-0.91	2.23	0	0	1.506e-06	4.189e-05	5.39	30	44	64.9	58.5	46.1	57.5	94.9	37.8	54.4	62.7	44.4
High	Acetyl-coenzyme A synthetase 2-like, mitochondrial OS=Mus musculus OX=10090 GN=Acss1 PE=1 SV=1	[R].LPGCVPAAAQPGSYPALSAQAAQEPAAFWGPLAR.[D]	1xCarbamidomethyl [C4]; 2xOxidation [P25; P31]; 1xTMT6plex [N-Term]	Q99NB1 2xOxidation [P62; P68]	4.88324e-06	0	1	1	6	Q99NB1	Q99NB1 [38-71]	0	3681.87	0	50.9	52.7	11.79	9.17		High	High	High	High	High	High	High	High	High	High	High	High	-2.64	-2.64	0	0	5.06e-07	1.072e-05	7.78	55	51.3	50.2	58.9	50.5	44.7	44.6	52.7	52.1	56.4	56.2
High	Acetyl-coenzyme A synthetase 2-like, mitochondrial OS=Mus musculus OX=10090 GN=Acss1 PE=1 SV=1	[K].VPMGSLDIPLEQEMAK.[E]	1xOxidation [P/M]; 1xTMT6plex [K16]; 1xTMT6plex [N-Term]	Q99NB1 1xOxidation [P]	9.49457e-08	0	1	1	74	Q99NB1	Q99NB1 [251-266]	0	2232.2	0	4519.6	4437.9	2.56	5.77		High	High	High	High	High	High	High	High	High	High	High	High	0.75	-1.61	0	0	4.069e-05	1.454e-06	5.64	32	4520.1	4668.4	4519.1	4331.4	4484.1	4239.3	4437.9	4391.3	4897.8	4691.7
High	Aconitate hydratase, mitochondrial (Fragment) OS=Mus musculus OX=10090 GN=Aco2 PE=1 SV=1 Aconitate hydratase, mitochondrial OS=Mus musculus OX=10090 GN=Aco2 PE=1 SV=1	[K].LTGSLSGWTSPK.[D]	1xOxidation [P11]; 1xTMT6plex [K12]; 1xTMT6plex [N-Term]	A0A2R8W744 1xOxidation [P112]; Q99KI0 1xOxidation [P244]	0.00015002	0	2	2	10	A0A2R8W744; Q99KI0	A0A2R8W744 [102-113]; Q99KI0 [234-245]	0	1707.97	0	756.1	765.1	4.46	6.1	Shared	High	High	High	High	High	High	High	High	High	High	High	High	2.7	2.7	0	4.981e-05	2.333e-05	0.0007509	3.91	35	784.4	718.2	796.3	732.5	729.3	731.9	765.1	791.6	830.5	713.4
High	Aconitate hydratase, mitochondrial OS=Mus musculus OX=10090 GN=Aco2 PE=1 SV=1	[K].VAVPSTIHCDHLIEAQVGGEK.[D]	1xCarbamidomethyl [C9]; 1xOxidation [P4]; 1xTMT6plex [K21]; 1xTMT6plex [N-Term]	Q99KI0 1xOxidation [P121]	0.00130936	7.4751e-05	1	1	3	Q99KI0	Q99KI0 [118-138]	0	2734.46	0					No Quan Values	High	High	High	High	High	High	High	High	High	High	High	High	1.14	1.14	1.127e-05	0.0001969	0.0002641	0.002416	3.51	16
High	Aconitate hydratase, mitochondrial OS=Mus musculus OX=10090 GN=Aco2 PE=1 SV=1	[R].SDFDPGQDTYQHPPK.[D]	1xOxidation [P]; 1xTMT6plex [K15]; 1xTMT6plex [N-Term]	Q99KI0 1xOxidation [P]	0.000131606	0	1	1	5	Q99KI0	Q99KI0 [535-549]	0	2206.08	0	195.8	200.9	7.48	5.6		High	High	High	High	High	High	High	High	High	High	High	High	0.99	1.91	0	0	4.171e-05	9.443e-06	4.1	12	180.9	209.8	183.7	212.3	207.2	184.4	186	206	207.6	200.9
High	Aconitate hydratase, mitochondrial OS=Mus musculus OX=10090 GN=Aco2 PE=1 SV=1	[K].QGLLPLTFADPSDYNK.[I]	1xOxidation [P11]; 1xTMT6plex [K16]; 1xTMT6plex [N-Term]	Q99KI0 1xOxidation [P712]	0.000656841	0	1	1	2	Q99KI0	Q99KI0 [702-717]	0	2253.22	0	57.7	62.7	5.95	1.59		High	High	High	High	High	High	High	High	High	High	High	High	0.2	0.2	0	4.502e-05	0.0001221	0.0005907	3.44	10	54.5	62.9	60.5	54.4	56.3	62.7	63.7	62.3	63	61
High	Aconitate hydratase, mitochondrial OS=Mus musculus OX=10090 GN=Aco2 PE=1 SV=1	[R].LQLLEPFDKWDGK.[D]	1xOxidation [P6]; 2xTMT6plex [K9; K13]; 1xTMT6plex [N-Term]	Q99KI0 1xOxidation [P570]	0.00547168	0.000414721	1	1	18	Q99KI0	Q99KI0 [565-577]	1	2292.32	0	1199	1135.4	6.08	9.14		High	High	High	High	High	High	High	High	High	High	High	High	0.75	0.44	0.0001257	0.0002361	0.00175	0.003178	4.42	12	1284	1072.8	1244.5	1195.3	1164	1069.5	1243.2	1135.4	1310.6	1074.3
High	Aconitate hydratase, mitochondrial OS=Mus musculus OX=10090 GN=Aco2 PE=1 SV=1	[K].IVYGHLDDPANQEIER.[G]	1xOxidation [P9]; 1xTMT6plex [N-Term]	Q99KI0 1xOxidation [P77]	0.00171494	0.000170585	1	2	9	Q99KI0	Q99KI0 [69-84]	0	2114.07	0	736.2	742	4.05	4.53		High	High	High	High	High	High	High	High	High	High	High	High	1.69	0.81	9.615e-05	4.981e-05	0.0009594	0.0008302	3.23	10	776.4	730.2	724	742.2	790.2	739.3	742	725.4	792.7	801.6
High	Aconitate hydratase, mitochondrial OS=Mus musculus OX=10090 GN=Aco2 PE=1 SV=1	[R].DVGGIVLANACGPCIGQWDR.[K]	2xCarbamidomethyl [C11; C14]; 1xDeamidated [N/Q]; 1xOxidation [P13]; 1xTMT6plex [N-Term]	Q99KI0 1xOxidation [P450]	2.00787e-08	0	1	1	31	Q99KI0	Q99KI0 [438-457]	0	2404.16	0	902.5	889.6	3.93	2.25		High	High	High	High	High	High	High	High	High	High	High	High	7.9	-0.1	0	0	8.355e-07	3.136e-08	5.91	34	905.2	899.8	968.5	869.9	908	889.6	879	869.9	921	902
High	Aconitate hydratase, mitochondrial OS=Mus musculus OX=10090 GN=Aco2 PE=1 SV=1	[R].DVGGIVLANACGPCIGQWDR.[K]	2xCarbamidomethyl [C11; C14]; 1xOxidation [P13]; 1xTMT6plex [N-Term]	Q99KI0 1xOxidation [P450]	5.12022e-09	0	1	1	52	Q99KI0	Q99KI0 [438-457]	0	2403.17	0	1202.5	1246.6	5.45	3.86		High	High	High	High	High	High	High	High	High	High	High	High	-2.05	-0.39	0	0	4.103e-09	1.938e-08	6.45	51	1195.1	1209.9	1302.2	1141.9	1152.4	1248.6	1195.6	1187	1246.6	1305.2
High	Aconitate hydratase, mitochondrial OS=Mus musculus OX=10090 GN=Aco2 PE=1 SV=1	[R].DVGGIVLANACGPCIGQWDR.[K]	2xCarbamidomethyl [C11; C14]; 2xDeamidated [N9; Q17]; 1xOxidation [P13]; 1xTMT6plex [N-Term]	Q99KI0 1xOxidation [P450]	3.48713e-07	0	1	1	2	Q99KI0	Q99KI0 [438-457]	0	2405.14	0	62	57.6	11.83	12.55		High	High	High	High	High	High	High	High	High	High	High	High	13.38	13.38	0	0	2.636e-08	5.232e-06	5.18	50	71.7	64.6	59.7	56.9	64.4	54.4	57.6	60.4	54.2	72.4
High	Actin, cytoplasmic 1 OS=Mus musculus OX=10090 GN=Actb PE=1 SV=1 Actin, aortic smooth muscle OS=Mus musculus OX=10090 GN=Acta2 PE=1 SV=1 Actin, alpha skeletal muscle OS=Mus musculus OX=10090 GN=Acta1 PE=1 SV=1	[RK].SYELPDGQVITIGNER.[F]	1xOxidation [P5]; 1xTMT6plex [N-Term]	P60710 1xOxidation [P243]; P62737 1xOxidation [P245]; P68134 1xOxidation [P245]	3.86449e-06	0	3	10	4	P60710; P62737; P68134	P60710 [239-254]; P62737 [241-256]; P68134 [241-256]	0	2036.05	0	219.7	235.6	10.92	9.47	Shared	High	High	High	High	High	High	High	High	High	High	High	High	0.51	3.57	0	0	5.518e-05	1.431e-07	4.43	25	264.4	260.9	206.2	214.3	216.7	263.2	212.4	215.9	235.6	253.3
Medium	Acyl-CoA 6-desaturase OS=Mus musculus OX=10090 GN=Fads2 PE=1 SV=1	[-].MGKGGNQGEGSTERQAPMPTFR.[W]	3xDeamidated [N6; Q7; Q15]; 1xOxidation [P19]; 1xTMT6plex [K3]; 1xTMT6plex [N-Term]	Q9Z0R9 1xOxidation [P19]	0.27945	0.0212729	1	1	1	Q9Z0R9	Q9Z0R9 [1-22]	2	2813.36	0					No Quan Values	High	High	High	High	High	High	High	High	High	High	High	Low	-5.47	-5.47	0.006596	0.0838	0.1103	0.8421	2.37	1
Medium	Acyl-Coenzyme A dehydrogenase family, member 12 OS=Mus musculus OX=10090 GN=Acad12 PE=1 SV=1	[R].WSPSPLIEDLK.[E]	2xOxidation [P3; P5]; 1xTMT6plex [K11]; 1xTMT6plex [N-Term]	D3Z7X0 2xOxidation [P188; P190]	0.502685	0.0484172	1	3	2	D3Z7X0	D3Z7X0 [186-196]	0	1775	0	52.4	54.5	5.57	14.62		Medium	Medium	Medium	Medium	Medium	Medium	Medium	Medium	Medium	Medium	Medium	Medium	-0.1	-0.1	0.0157	0.04531	0.2142	0.5107	2.5	7	50.4	54.4	55.3	50.2	55.2	40.2	49.2	54.6	54.5	60.3
Medium	Acyl-coenzyme A thioesterase 1 OS=Mus musculus OX=10090 GN=Acot1 PE=1 SV=1 Acyl-coenzyme A thioesterase 2, mitochondrial OS=Mus musculus OX=10090 GN=Acot2 PE=1 SV=2	[R].SCWDEPLSIAVR.[G]	1xCarbamidomethyl [C2]; 1xOxidation [P6]; 1xTMT6plex [N-Term]	O55137 1xOxidation [P18]; Q9QYR9 1xOxidation [P59]	0.453202	0.0415934	2	5	2	O55137; Q9QYR9	O55137 [13-24]; Q9QYR9 [54-65]	0	1677.85	0	123.7	113.1	9.17	7.51	Shared	Medium	Medium	Medium	Medium	Medium	Medium	Medium	Medium	Medium	Medium	Medium	Medium	2.75	2.75	0.02912	0.01417	0.3585	0.1984	2.75	6	104.9	138.5	121.6	132.2	124.1	110.8	113.1	116.2	107.8	130.1
Medium	Acylglycerol kinase, mitochondrial OS=Mus musculus OX=10090 GN=Agk PE=1 SV=1	[R].AACQEAQVFGNQLIPPNAQVK.[K]	1xCarbamidomethyl [C3]; 3xDeamidated [Q7; Q12; Q19]; 1xOxidation [P16]; 1xTMT6plex [K21]; 1xTMT6plex [N-Term]	Q9ESW4 1xOxidation [P56]	0.445274	0.0405564	1	3	1	Q9ESW4	Q9ESW4 [41-61]	0	2760.43	0	131.1	136.8	9.99	7.97		Medium	Medium	Medium	Medium	Medium	Medium	Medium	Medium	Medium	Medium	n/a	Medium		0.12		0.01367		0.1943	3.34		103.9	138.6	129.7	132.5	128.4	136.8	130.1	129.3	138.7	156.6
High	Acyl-protein thioesterase 1 OS=Mus musculus OX=10090 GN=Lypla1 PE=1 SV=1	[R].DISVLQCHGDCDPLVPLMFGSLTVER.[L]	2xCarbamidomethyl [C7; C11]; 1xOxidation [P/M]; 1xTMT6plex [N-Term]	P97823 1xOxidation [P]	6.90678e-08	0	1	5	6	P97823	P97823 [163-188]	0	3203.57	0	152.9	161.9	7.87	2.37		High	High	High	High	High	High	High	High	High	High	High	High	-1.9	-1.9	0	0	4.269e-09	4.918e-08	6.44	39	148.5	167.8	172.6	141.9	147	169.8	161.6	161.9	166.1	160.6
High	Adenomatous polyposis coli protein 2 OS=Mus musculus OX=10090 GN=Apc2 PE=1 SV=1	[R].AGIPGAPGAK.[D]	1xOxidation [P4]; 1xTMT6plex [K10]; 1xTMT6plex [N-Term]	Q9Z1K7 1xOxidation [P334]	0.0768793	0.0054592	1	3	2	Q9Z1K7	Q9Z1K7 [331-340]	0	1312.8	0					No Quan Values	High	High	High	High	High	High	High	High	High	High	High	High	-9.17	-9.17	0.001671	0.00829	0.02507	0.127	2.05	25
High	Adenosine kinase OS=Mus musculus OX=10090 GN=Adk PE=1 SV=2	[K].AADAHVDAHYYEQNEQPTGTCAACITGGNR.[S]	2xCarbamidomethyl [C21; C24]; 1xOxidation [P17]; 1xTMT6plex [N-Term]	P55264 1xOxidation [P135]	1.09256e-07	0	1	3	2	P55264	P55264 [119-148]	0	3522.56	0	30.1	25.4	25.96	18.58		High	High	High	High	High	High	High	High	High	High	High	High	3.97	3.97	0	0	7.149e-09	4.198e-09	5.05	19	31.7	24.9	45.7	28.6	33.4	34.5	24.2	25.4	28.9	21.5
High	Adenylate kinase 2, mitochondrial (Fragment) OS=Mus musculus OX=10090 GN=Ak2 PE=1 SV=1 Adenylate kinase 2, mitochondrial OS=Mus musculus OX=10090 GN=Ak2 PE=1 SV=5	[R].AVLLGPPGAGK.[G]	1xOxidation [P7]; 1xTMT6plex [K11]; 1xTMT6plex [N-Term]	F7BP55 1xOxidation [P21]; Q9WTP6 1xOxidation [P24]	0.0253544	0.00121065	2	3	2	F7BP55; Q9WTP6	F7BP55 [15-25]; Q9WTP6 [18-28]	0	1453.91	0					No Quan Values	High	High	High	High	High	High	High	High	High	High	High	High	2.77	0.3	0.000369	0.0006569	0.007196	0.00994	3.74	29
High	Adiponectin OS=Mus musculus OX=10090 GN=Adipoq PE=1 SV=2	[R].GFPGTPGR.[K]	1xOxidation [P3]; 1xTMT6plex [N-Term]	Q60994 1xOxidation [P98]	0.0781823	0.0055731	1	2	2	Q60994	Q60994 [96-103]	0	1033.56	0	597.6	651.3	9.32	19.91		High	High	High	High	High	High	High	High	High	High	High	High	-1.03	-1.03	0.001932	0.001308	0.02855	0.01926	2.69	24	601	644.8	594.2	634.8	526.7	651.3	628.1	584.7	935.5	677.4
Medium	Adiponectin OS=Mus musculus OX=10090 GN=Adipoq PE=1 SV=2	[R].DGTPGEK.[G]	1xOxidation [P4]; 1xTMT6plex [K7]; 1xTMT6plex [N-Term]	Q60994 1xOxidation [P65]	0.353098	0.0288968	1	2	2	Q60994	Q60994 [62-68]	0	1177.65	0	140.3	121.1	23.7	13.1		High	High	High	High	High	High	High	High	High	High	Medium	High	-0.88	-0.88	0.02903	0.009127	0.3576	0.14	2.26	10	146.2	139.1	96.7	168.8	141.6	121.1	119.3	144.1	99.3	124.2
High	Adiponectin OS=Mus musculus OX=10090 GN=Adipoq PE=1 SV=2	[R].GFPGTPGR.[K]	2xOxidation [P3; P6]; 1xTMT6plex [N-Term]	Q60994 2xOxidation [P98; P101]	0.0546694	0.00402998	1	2	6	Q60994	Q60994 [96-103]	0	1049.56	0	1197.2	1291.2	9.89	15.23		High	High	High	High	High	High	High	High	High	High	High	High	0.8	0.55	0.00144	0.0008749	0.02178	0.01244	2.59	26	1304.5	1038.4	1246.7	1058.6	1149.7	1291.2	1247.5	1487.7	959.5	1329.3
Medium	Agrin OS=Mus musculus OX=10090 GN=Agrn PE=1 SV=1	[R].TPGPQRPPK.[S]	1xDeamidated [Q5]; 1xOxidation [P4]; 1xTMT6plex [K9]; 1xTMT6plex [N-Term]	M0QWP1 1xOxidation [P1315]	0.337768	0.0269647	1	5	1	M0QWP1	M0QWP1 [1312-1320]	0	1452.86	0	429.7	416.3	7.96	2.66		High	High	High	High	High	High	High	High	High	High	n/a	High		-0.6		0.008535		0.1315	2.06		467.6	370.8	437.2	399.8	422.4	423.1	395.7	416.3	413.9	421.8
Medium	AHNAK nucleoprotein (desmoyokin) OS=Mus musculus OX=10090 GN=Ahnak PE=1 SV=1	[K].VDINAPEVEVQGK.[V]	1xOxidation [P6]; 1xTMT6plex [K13]; 1xTMT6plex [N-Term]	E9Q616 1xOxidation [P3118]	0.257661	0.0193585	1	1	1	E9Q616	E9Q616 [3113-3125]	0	1872.05	0					No Quan Values	High	High	High	High	High	High	High	High	High	High	n/a	High		0.16		0.00605		0.08961	1.12
High	AHNAK nucleoprotein (desmoyokin) OS=Mus musculus OX=10090 GN=Ahnak PE=1 SV=1	[K].VDIDVPDVDVHGPDWHLK.[M]	2xOxidation [P6; P13]; 1xTMT6plex [K18]; 1xTMT6plex [N-Term]	E9Q616 2xOxidation [P2611; P2618]; 2xOxidation [P5470; P5477]; 2xOxidation [P8781; P8788]; 2xOxidation [P12220; P12227]; 2xOxidation [P15787; P15794]; 2xOxidation [P19608; P19615]; 2xOxidation [P24147; P24154]	0.0595813	0.0044104	1	1	1	E9Q616	E9Q616 [2606-2623]; [2860-2877]; [3312-3329]; [3440-3457]; [3568-3585]; [3822-3839]; [4540-4557]	0	2546.33	0	150.6	155.7	5.26	6.77		High	High	High	High	High	High	High	High	High	High	n/a	High		0		0.0009734		0.01381	2.94		146.5	159.7	154.9	160.6	141.4	169.4	160.6	143.2	147	155.7
Medium	Alcohol dehydrogenase class-3 OS=Mus musculus OX=10090 GN=Adh5 PE=1 SV=3	[K].EFGASECISPQDFSK.[S]	1xCarbamidomethyl [C7]; 1xDeamidated [Q11]; 1xOxidation [P10]; 1xTMT6plex [K15]; 1xTMT6plex [N-Term]	P28474 1xOxidation [P243]	0.419532	0.0367814	1	1	1	P28474	P28474 [234-248]	0	2177.05	0					No Quan Values	Medium	Medium	Medium	Medium	Medium	Medium	Medium	Medium	Medium	Medium	n/a	Medium		12.13		0.01199		0.1788	2.38
High	Aldehyde dehydrogenase X, mitochondrial OS=Mus musculus OX=10090 GN=Aldh1b1 PE=1 SV=1	[K].TIPMDGEHFCFTR.[H]	1xCarbamidomethyl [C10]; 1xOxidation [P/M]; 1xTMT6plex [N-Term]	Q9CZS1 1xOxidation [P]	0.00567819	0.000414721	1	1	2	Q9CZS1	Q9CZS1 [162-174]	0	1855.87	0					No Quan Values	High	High	High	High	High	High	High	High	High	High	High	High	-1.11	-1.11	0.0001257	0.0002146	0.001352	0.002748	2.57	12
High	Aldose reductase OS=Mus musculus OX=10090 GN=Akr1b1 PE=1 SV=3	[K].YKPAVNQIECHPYLTQEK.[L]	1xCarbamidomethyl [C10]; 1xOxidation [P12]; 2xTMT6plex [K2; K18]; 1xTMT6plex [N-Term]	P45376 1xOxidation [P189]	1.00388e-05	0	1	1	2	P45376	P45376 [178-195]	0	2921.58	0					No Quan Values	High	High	High	High	High	High	High	High	High	High	High	High	1.95	1.95	0	0	1.133e-06	5.14e-07	3.75	16
High	Aldose reductase OS=Mus musculus OX=10090 GN=Akr1b1 PE=1 SV=3	[K].GIVVTAYSPLGSPDRPWAKPEDPSLLEDPR.[I]	2xOxidation [P]; 1xTMT6plex [K19]; 1xTMT6plex [N-Term]	P45376 2xOxidation [P]	0.000193117	0	1	1	4	P45376	P45376 [204-233]	0	3752.99	0	183	189.4	6.45	5.77		High	High	High	High	High	High	High	High	High	High	High	High	1.03	1.03	0	0.0001059	3.104e-05	0.00148	5.34	27	178.3	171.6	193.7	178.1	187.9	173.7	200.2	193.1	189.4	178.5
High	Alpha-crystallin B chain OS=Mus musculus OX=10090 GN=Cryab PE=1 SV=2	[R].APSWIDTGLSEMR.[L]	2xOxidation [P2; M12]; 1xTMT6plex [N-Term]	P23927 2xOxidation [P58; ]	0.00191736	0.000188861	1	2	6	P23927	P23927 [57-69]	0	1723.85	0	148.5	121.9	11.71	20.19		High	High	High	High	High	High	High	High	High	High	High	High	-0.21	0.54	4.271e-05	6.55e-05	0.0004039	0.00101	2.95	1	156.2	118	142.9	154.3	166.3	112.4	116.3	127.8	177.3	121.9
High	Alpha-enolase OS=Mus musculus OX=10090 GN=Eno1 PE=1 SV=3 Alpha-enolase (Fragment) OS=Mus musculus OX=10090 GN=Eno1 PE=1 SV=1 Beta-enolase OS=Mus musculus OX=10090 GN=Eno3 PE=1 SV=3 Gamma-enolase OS=Mus musculus OX=10090 GN=Eno2 PE=1 SV=2	[R].AAVPSGASTGIYEALELR.[D]	1xOxidation [P4]; 1xTMT6plex [N-Term]	P17182 1xOxidation [P36]; B0QZL1 1xOxidation [P36]; P21550 1xOxidation [P36]; P17183 1xOxidation [P36]	0.00527264	0.000414721	4	14	4	P17182; B0QZL1; P21550; P17183	P17182 [33-50]; B0QZL1 [33-50]; P21550 [33-50]; P17183 [33-50]	0	2050.1	0	72.9	68.3	10.9	6.14	Shared	High	High	High	High	High	High	High	High	High	High	High	High	1.09	1.09	0.0002427	4.981e-05	0.00457	0.0007541	2.78	19	54.9	72.8	72.2	73	75	68.3	69.8	71.2	62.8	62.2
Medium	Amine oxidase [flavin-containing] B OS=Mus musculus OX=10090 GN=Maob PE=1 SV=4	[K].IPEDEIWQPEPESLDVPARPITSTFLER.[H]	1xOxidation [P9]; 1xTMT6plex [N-Term]	Q8BW75 1xOxidation [P465]	0.142515	0.0102526	1	1	2	Q8BW75	Q8BW75 [457-484]	0	3509.8	0	37.5	40.4	16.23	14.61		High	High	High	High	High	High	High	High	High	High	High	High	2.06	2.06	0.004148	0.003123	0.06997	0.04076	4.2	5	37.4	37.6	42.1	35.1	25.7	33.3	40.8	35.7	48.4	40.4
High	Amine oxidase [flavin-containing] B OS=Mus musculus OX=10090 GN=Maob PE=1 SV=4	[K].IPEDEIWQPEPESLDVPARPITSTFLER.[H]	2xOxidation [P9; P11]; 1xTMT6plex [N-Term]	Q8BW75 2xOxidation [P465; P467]	0.000101278	0	1	1	6	Q8BW75	Q8BW75 [457-484]	0	3525.8	0	140.5	132.6	5.33	16.24		High	High	High	High	High	High	High	High	High	High	High	High	3.32	2.4	0	1.196e-05	1.5e-05	0.000349	4.6	1	130.5	138.3	142.7	128.6	145	116.4	120.4	135.6	172	132.6
Medium	Amine oxidase OS=Mus musculus OX=10090 GN=1600015I10Rik PE=3 SV=1	[K].VTEFAVGPMPLPIYMR.[E]	2xOxidation [P8; P10]; 1xTMT6plex [N-Term]	E9Q745 2xOxidation [P129; P131]	0.427143	0.037726	1	1	1	E9Q745	E9Q745 [122-137]	0	2082.1	0	376.3	385.2	6.3	4.56		Medium	Medium	Medium	Medium	Medium	Medium	Medium	Medium	Medium	Medium	n/a	Medium		-0.41		0.01235		0.1822	1.84		355.3	361.4	391.7	399.6	352.4	366.5	406.7	385.4	363.6	385.2
High	Amylo-1,6-glucosidase, 4-alpha-glucanotransferase OS=Mus musculus OX=10090 GN=Agl PE=1 SV=1	[R].CESEEQEDGGGCYDIPNWSSLK.[Y]	2xCarbamidomethyl [C1; C12]; 1xDeamidated [N17]; 1xOxidation [P16]; 1xTMT6plex [K22]; 1xTMT6plex [N-Term]	F8VPN4 1xOxidation [P926]	0.0242364	0.00111862	1	3	1	F8VPN4	F8VPN4 [911-932]	0	3035.33	0	39.4	41.1	12.17	14.34		High	High	High	High	High	High	High	High	High	High	n/a	High		14.6		0.0003325		0.004624	3.18		38.4	48	40.4	38	35.2	33.2	41.1	35.9	47.8	42.5
Medium	Ankyrin repeat domain 35 OS=Mus musculus OX=10090 GN=Ankrd35 PE=1 SV=1	[K].ALATINPTLVPK.[R]	1xDeamidated [N6]; 2xOxidation [P7; P11]; 1xTMT6plex [K12]; 1xTMT6plex [N-Term]	E9Q9D8 2xOxidation [P396; P400]	0.419532	0.0367814	1	1	1	E9Q9D8	E9Q9D8 [390-401]	0	1729.05	0	101.9	109.1	7.97	8.28		Medium	Medium	Medium	Medium	Medium	Medium	Medium	Medium	Medium	Medium	n/a	Medium		4.84		0.01198		0.1786	2.51		97.2	102.9	100.5	102.3	120.6	95.5	115.4	114.2	99.7	109.1
High	Annexin A6 OS=Mus musculus OX=10090 GN=Anxa6 PE=1 SV=3	[R].DQAQEDAQVAAEILEIADTPSGDK.[T]	1xDeamidated [Q8]; 1xOxidation [P20]; 1xTMT6plex [K24]; 1xTMT6plex [N-Term]	P14824 1xOxidation [P536]	6.17055e-06	0	1	1	2	P14824	P14824 [517-540]	0	2989.49	0	46.7	40.6	8.24	8.41		High	High	High	High	High	High	High	High	High	High	High	High	13.46	13.46	0	0	6.589e-07	2.665e-07	4.67	30	51.4	41	47	51	45.1	41.1	40.6	44.7	39.4	35.3
Medium	Annexin A6 OS=Mus musculus OX=10090 GN=Anxa6 PE=1 SV=3 Annexin OS=Mus musculus OX=10090 GN=Anxa6 PE=1 SV=1	[K].GTVCAANDFNPDADAK.[A]	1xCarbamidomethyl [C4]; 1xOxidation [P11]; 1xTMT6plex [K16]; 1xTMT6plex [N-Term]	P14824 1xOxidation [P365]; F8WIT2 1xOxidation [P365]	0.385281	0.0322547	2	2	2	P14824; F8WIT2	P14824 [355-370]; F8WIT2 [355-370]	0	2140.04	0	160.5	170.7	11.64	9.99	Shared	Medium	Medium	Medium	Medium	Medium	Medium	Medium	Medium	Medium	Medium	Medium	Medium	1.79	1.79	0.01071	0.01035	0.1625	0.1587	2.46	6	165.1	159.6	197.6	161.4	140.2	165	187.2	173.3	170.7	141.4
Medium	Apoptosis inhibitor 5 OS=Mus musculus OX=10090 GN=Api5 PE=1 SV=2	[K].LLEYMPLPPEEAENGENAGNEEPK.[L]	2xDeamidated [N17; N20]; 3xOxidation [P6; P8; P9]; 1xTMT6plex [K24]; 1xTMT6plex [N-Term]	O35841 3xOxidation [P319; P321; P322]	0.491414	0.0471733	1	1	3	O35841	O35841 [314-337]	0	3178.5	0	10	11.4	25.86	56.1		Medium	Medium	Medium	Medium	Medium	Medium	Not Found	Medium	Medium	Medium	Medium	n/a	-9.88		0.01516		0.2085			3	13.8	7.5	11.2	8.9	12.3	6.2		9.9	13.3	23.4
Medium	Arginase-2, mitochondrial OS=Mus musculus OX=10090 GN=Arg2 PE=1 SV=1	[K].LAPATGTPVVGGLTYR.[E]	1xOxidation [P3]; 1xTMT6plex [N-Term]	O08691 1xOxidation [P261]	0.43485	0.0390111	1	1	1	O08691	O08691 [259-274]	0	1818.03	0					No Quan Values	Medium	Medium	Medium	Medium	Medium	Medium	Medium	Medium	Medium	Medium	n/a	Medium		-1.21		0.01293		0.1875	0.79
High	Aspartate aminotransferase, cytoplasmic OS=Mus musculus OX=10090 GN=Got1 PE=1 SV=3	[R].TDESQPWVLPVVR.[K]	1xOxidation [P6]; 1xTMT6plex [N-Term]	P05201 1xOxidation [P48]	0.00063277	0	1	2	24	P05201	P05201 [43-55]	0	1770.96	0	328.3	322.7	4.85	3.92		High	High	High	High	High	High	High	High	High	High	High	High	-1.26	2.5	0	0.0001206	0.0001169	0.001632	5.1	16	322.2	328.8	348.9	299.8	327.8	322.7	343.3	312.9	339.4	321.5
High	Aspartate aminotransferase, cytoplasmic OS=Mus musculus OX=10090 GN=Got1 PE=1 SV=3	[R].IVAATLSDPELFK.[E]	1xOxidation [P9]; 1xTMT6plex [K13]; 1xTMT6plex [N-Term]	P05201 1xOxidation [P314]	0.000675491	0	1	1	2	P05201	P05201 [306-318]	0	1878.1	0	99.6	104.5	9.28	5.04		High	High	High	High	High	High	High	High	High	High	High	High	6.57	6.57	0	0.0003372	0.0001255	0.004669	3.84	34	101.2	96.3	114.1	87.8	98.1	99.1	111.8	104.5	107.9	100.2
High	Aspartate aminotransferase, cytoplasmic OS=Mus musculus OX=10090 GN=Got1 PE=1 SV=3	[R].TDESQPWVLPVVR.[K]	2xOxidation [P6; P10]; 1xTMT6plex [N-Term]	P05201 2xOxidation [P48; P52]	0.0129163	0.000551893	1	2	10	P05201	P05201 [43-55]	0	1786.95	0	808.2	772.2	13.51	4.4		High	High	High	High	High	High	High	High	High	High	High	High	2.28	-0.29	0.001463	0.0001838	0.02211	0.002189	3.83	25	824.2	775.7	1053.8	731.7	792.6	772.2	737.8	828.2	755.3	781.6
Medium	Aspartate aminotransferase, cytoplasmic OS=Mus musculus OX=10090 GN=Got1 PE=1 SV=3	[R].ITWSNPPAQGAR.[I]	2xOxidation [P6; P7]; 1xTMT6plex [N-Term]	P05201 2xOxidation [P299; P300]	0.217952	0.0159539	1	1	4	P05201	P05201 [294-305]	0	1558.82	0	313.7	337.5	14.31	11.71		High	High	High	High	High	High	High	High	High	High	Medium	High	0.28	0.28	0.01536	0.005725	0.2103	0.08314	2.25	1	313	272.7	407.5	295.7	314.4	345.8	281.8	337.5	347.1	271.1
High	Aspartate aminotransferase, mitochondrial OS=Mus musculus OX=10090 GN=Got2 PE=1 SV=1	[K].IPEQSVLLLHACAHNPTGVDPRPEQWK.[E]	1xCarbamidomethyl [C12]; 1xOxidation [P]; 1xTMT6plex [K27]; 1xTMT6plex [N-Term]	P05202 1xOxidation [P]	6.28464e-05	0	1	1	17	P05202	P05202 [201-227]	0	3566.89	0	620.4	629.1	5.56	4.49		High	High	High	High	High	High	High	High	High	High	High	High	-1.25	-0.15	0	0	3.296e-05	3.941e-06	6.66	18	626.6	614.2	676.5	578.4	599.2	629.1	683	616.7	645.6	612.2
High	Aspartate aminotransferase, mitochondrial OS=Mus musculus OX=10090 GN=Got2 PE=1 SV=1	[K].EYLPIGGLAEFCK.[A]	1xCarbamidomethyl [C12]; 1xOxidation [P4]; 1xTMT6plex [K13]; 1xTMT6plex [N-Term]	P05202 1xOxidation [P98]	0.0115663	0.000551893	1	1	2	P05202	P05202 [95-107]	0	1971.07	0	92.7	88.7	10.96	4.62		High	High	High	High	High	High	High	High	High	High	High	High	0.29	0.29	0.0001857	0.0005132	0.002975	0.007549	3.07	18	81.4	100.3	91.6	108.2	93.9	94	85.5	83.5	90.1	88.7
High	Aspartate aminotransferase, mitochondrial OS=Mus musculus OX=10090 GN=Got2 PE=1 SV=1	[K].IPEQSVLLLHACAHNPTGVDPRPEQWK.[E]	1xCarbamidomethyl [C12]; 2xOxidation [P21; P23]; 1xTMT6plex [K27]; 1xTMT6plex [N-Term]	P05202 2xOxidation [P221; P223]	2.86433e-06	0	1	1	8	P05202	P05202 [201-227]	0	3582.89	0	549.7	590.1	5.61	3.61		High	High	High	High	High	High	High	High	High	High	High	High	1.65	1.43	0	0	3.442e-06	6.055e-05	6.68	18	524.6	534.5	607	565.2	532.7	590.1	606.3	555.4	583.7	607.7
High	Aspartate aminotransferase, mitochondrial OS=Mus musculus OX=10090 GN=Got2 PE=1 SV=1	[K].IPEQSVLLLHACAHNPTGVDPRPEQWK.[E]	1xCarbamidomethyl [C12]; 3xOxidation [P16; P21; P23]; 1xTMT6plex [K27]; 1xTMT6plex [N-Term]	P05202 3xOxidation [P216; P221; P223]	0.00316614	0.000252531	1	1	2	P05202	P05202 [201-227]	0	3598.88	0	137	148.8	5.06	5.39		High	High	High	High	High	High	High	High	High	High	n/a	High		-0.5		2.328e-05		0.00041	4.65		142.3	130.5	150.5	135.9	138	141.1	148.8	136.1	153.8	153.9
High	Aspartate aminotransferase, mitochondrial OS=Mus musculus OX=10090 GN=Got2 PE=1 SV=1	[K].NLDKEYLPIGGLAEFCK.[A]	1xCarbamidomethyl [C16]; 1xOxidation [P8]; 2xTMT6plex [K4; K17]; 1xTMT6plex [N-Term]	P05202 1xOxidation [P98]	0.00183028	0.000188861	1	1	18	P05202	P05202 [91-107]	1	2670.48	0	3045.3	3094.6	2.96	2.77		High	High	High	High	High	High	High	High	High	High	High	High	-1.08	-1.39	4.271e-05	0.006427	0.0003847	0.09537	3.76	0	3016.2	2990.3	3074.7	2931.1	3113.5	3029	3234.1	3094.6	3021.2	3117.5
Medium	Aspartate aminotransferase, mitochondrial OS=Mus musculus OX=10090 GN=Got2 PE=1 SV=1	[R].DDNGKPYVLPSVR.[K]	1xDeamidated [N3]; 1xOxidation [P6]; 1xTMT6plex [K5]; 1xTMT6plex [N-Term]	P05202 1xOxidation [P74]	0.162395	0.0115928	1	1	2	P05202	P05202 [69-81]	0	1935.06	0	513.1	486.4	13.18	6.91		High	High	High	High	High	High	High	High	High	High	n/a	High		1.43		0.003547		0.04796	2.61		444.5	549.6	488.8	606.6	538.6	482.9	559.6	486.4	472.5	500.3
Medium	Aspartyl/asparaginyl beta-hydroxylase OS=Mus musculus OX=10090 GN=Asph PE=1 SV=1	[R].LVQLFPSDTTLK.[N]	1xOxidation [P6]; 1xTMT6plex [K12]; 1xTMT6plex [N-Term]	Q8BSY0 1xOxidation [P434]	0.14141	0.0101571	1	3	2	Q8BSY0	Q8BSY0 [429-440]	0	1836.09	0	206.2	213.4	4.36	4.36		High	High	High	High	High	High	High	High	High	High	n/a	High		3.73		0.006032		0.08941	2.33		202.1	199.2	212.8	201	210.3	203.7	218.3	213.4	223.3	201.8
Medium	ATP synthase subunit alpha, mitochondrial OS=Mus musculus OX=10090 GN=Atp5f1a PE=1 SV=1	[R].EAYPGDVFYLHSR.[L]	1xOxidation [P4]; 1xTMT6plex [N-Term]	Q03265 1xOxidation [P338]	0.300607	0.0230266	1	2	1	Q03265	Q03265 [335-347]	0	1798.9	0	102.7	108	4.8	6.52		High	High	High	High	High	High	High	High	High	High	n/a	High		-0.57		0.007288		0.1112	2.68		105.5	96.2	105.5	96.4	100	113	102.7	108	96.9	113
High	ATP synthase subunit alpha, mitochondrial OS=Mus musculus OX=10090 GN=Atp5f1a PE=1 SV=1	[R].TGAIVDVPVGEELLGR.[V]	1xOxidation [P8]; 1xTMT6plex [N-Term]	Q03265 1xOxidation [P141]	0.0424777	0.00272066	1	2	1	Q03265	Q03265 [134-149]	0	1870.05	0	46.2	52.6	18.85	13.29		High	High	High	High	High	High	High	High	High	High	n/a	High		2.66		0.0006199		0.009124	2.18		60.6	50.2	42.6	58.9	38.7	52.6	54.5	40.4	57.1	46.8
Medium	ATP synthase subunit alpha, mitochondrial OS=Mus musculus OX=10090 GN=Atp5f1a PE=1 SV=1	[R].EPMQTGIK.[A]	2xOxidation [P2; M3]; 1xTMT6plex [K8]; 1xTMT6plex [N-Term]	Q03265 2xOxidation [P188; ]	0.339927	0.0272494	1	2	2	Q03265	Q03265 [187-194]	0	1393.78	0	138.2	135	12.43	21.18		High	High	High	High	High	High	High	High	High	High	Medium	High	1.02	1.02	0.01423	0.008575	0.1997	0.1319	2.43	20	114.1	159.1	147.9	122.6	145.5	197.8	121.5	144.6	135	126.6
High	ATP synthase subunit alpha, mitochondrial OS=Mus musculus OX=10090 GN=Atp5f1a PE=1 SV=1	[R].RPPGREAYPGDVFYLHSR.[L]	2xOxidation [P3; P]; 1xTMT6plex [N-Term]	Q03265 2xOxidation [P332; P]	0.0893495	0.00645533	1	2	4	Q03265	Q03265 [330-347]	1	2378.22	0	141.9	142.5	10.3	6.6		High	High	High	High	High	High	High	High	High	High	High	High	-4.67	-7.17	0.0021	0.007358	0.03174	0.1126	3.19	15	140.8	145.1	150.2	115.6	121.5	146	142.5	130.7	155.4	136.5
High	ATP synthase subunit beta, mitochondrial OS=Mus musculus OX=10090 GN=Atp5f1b PE=1 SV=2	[K].KGSITSVQAIYVPADDLTDPAPATTFAHLDATTVLSR.[A]	1xDeamidated [Q8]; 1xOxidation [P13]; 1xTMT6plex [K1]; 1xTMT6plex [N-Term]	P56480 1xOxidation [P363]	1.02367e-09	0	1	1	2	P56480	P56480 [351-387]	1	4318.29	0					No Quan Values	High	High	High	High	High	High	High	High	High	High	High	High	3.61	3.61	0	0	3.82e-11	1.471e-09	7.33	55
High	ATP synthase subunit beta, mitochondrial OS=Mus musculus OX=10090 GN=Atp5f1b PE=1 SV=2	[K].KGSITSVQAIYVPADDLTDPAPATTFAHLDATTVLSR.[A]	1xOxidation [P13]; 1xTMT6plex [K1]; 1xTMT6plex [N-Term]	P56480 1xOxidation [P363]	1.65023e-10	0	1	1	2	P56480	P56480 [351-387]	1	4317.3	0	47.7	52.5	15.22	10.09		High	High	High	High	High	High	High	High	High	High	High	High	3.8	3.8	0	0	4.967e-12	1.774e-09	8.22	53	46.9	48.5	42.7	63.6	54.1	43.2	53.7	52.5	53.2	45
Medium	ATP synthase subunit beta, mitochondrial OS=Mus musculus OX=10090 GN=Atp5f1b PE=1 SV=2	[K].IPVGPETLGR.[I]	1xOxidation [P2]; 1xTMT6plex [N-Term]	P56480 1xOxidation [P135]	0.318787	0.0245019	1	1	1	P56480	P56480 [134-143]	0	1283.75	0					No Quan Values	High	High	High	High	High	High	High	High	High	High	n/a	High		-0.45		0.007881		0.1212	2.19
High	ATP synthase subunit beta, mitochondrial OS=Mus musculus OX=10090 GN=Atp5f1b PE=1 SV=2	[K].VVDLLAPYAK.[G]	1xOxidation [P7]; 1xTMT6plex [K10]; 1xTMT6plex [N-Term]	P56480 1xOxidation [P195]	0.0179622	0.000799344	1	1	6	P56480	P56480 [189-198]	0	1562.96	0	146.3	153.5	5.72	2.6		High	High	High	High	High	High	High	High	High	High	High	High	1.15	1.15	0.0002427	0.0002796	0.004884	0.003912	2.91	18	142.4	155.3	160.2	137.5	144.1	153.5	156.9	149	153.3	159.6
High	ATP synthase subunit beta, mitochondrial OS=Mus musculus OX=10090 GN=Atp5f1b PE=1 SV=2	[K].VLDSGAPIK.[I]	1xOxidation [P7]; 1xTMT6plex [K9]; 1xTMT6plex [N-Term]	P56480 1xOxidation [P131]	0.048005	0.00333893	1	1	4	P56480	P56480 [125-133]	0	1373.84	0	213.4	217.2	11.95	3.84		High	High	High	High	High	High	High	High	High	High	High	High	0.57	0.57	0.003845	0.0007085	0.06472	0.01063	2.37	14	253.5	217	231.4	209.9	178.1	221.7	217.2	207.4	230	214.7
High	ATP synthase subunit beta, mitochondrial OS=Mus musculus OX=10090 GN=Atp5f1b PE=1 SV=2	[R].AIAELGIYPAVDPLDSTSR.[I]	1xOxidation [P9]; 1xTMT6plex [N-Term]	P56480 1xOxidation [P396]	8.40687e-08	0	1	1	19	P56480	P56480 [388-406]	0	2233.19	0	880.2	896.1	3.06	1.96		High	High	High	High	High	High	High	High	High	High	High	High	1.25	1.08	0	0	6.6e-09	1.926e-07	5.24	51	871	896.5	889.4	860.6	829.3	887.7	869	898.8	917.1	896.1
High	ATP synthase subunit beta, mitochondrial OS=Mus musculus OX=10090 GN=Atp5f1b PE=1 SV=2	[K].GFQQILAGEYDHLPEQAFYMVGPIEEAVAK.[A]	2xOxidation [P14; M20]; 1xTMT6plex [K30]; 1xTMT6plex [N-Term]	P56480 2xOxidation [P503; ]	7.10619e-10	0	1	1	6	P56480	P56480 [490-519]	0	3840.96	0	250.5	244.7	5.4	10.66		High	High	High	High	High	High	High	High	High	High	High	High	-1.1	-1.1	0	0	2.545e-11	3.12e-09	9.86	55	255.6	232.5	255	238	246.2	293	244.7	260.8	243.5	220.2
High	ATP synthase subunit d, mitochondrial OS=Mus musculus OX=10090 GN=Atp5pd PE=1 SV=3	[K].KYPYWPHQPIENL.[-]	1xOxidation [P3]; 1xTMT6plex [K1]; 1xTMT6plex [N-Term]	Q9DCX2 1xOxidation [P151]	0.0688828	0.00498567	1	1	2	Q9DCX2	Q9DCX2 [149-161]	1	2159.17	0	220.2	227.5	13.74	4.21		High	High	High	High	High	High	High	High	High	High	n/a	High		-0.04		0.001132		0.01648	3.26		207.9	272.2	220.7	222.3	178.7	225.5	245.3	219.9	233.8	227.5
High	ATP synthase subunit d, mitochondrial OS=Mus musculus OX=10090 GN=Atp5pd PE=1 SV=3	[R].LASLSEKPPAIDWAYYR.[A]	1xOxidation [P9]; 1xTMT6plex [K7]; 1xTMT6plex [N-Term]	Q9DCX2 1xOxidation [P50]	5.11718e-06	0	1	2	8	Q9DCX2	Q9DCX2 [42-58]	0	2454.34	0	905.5	884.2	4.4	9.02		High	High	High	High	High	High	High	High	High	High	High	High	0.29	0.29	0	0	8.888e-05	2.008e-07	5.06	2	844.2	897.8	936.6	916.5	843.4	814.3	993.7	884.2	1002.5	868.6
High	ATP synthase subunit d, mitochondrial OS=Mus musculus OX=10090 GN=Atp5pd PE=1 SV=3	[R].NIIPFDQMTIDDLNEIFPETK.[L]	2xOxidation [P4; M8]; 1xTMT6plex [K21]; 1xTMT6plex [N-Term]	Q9DCX2 2xOxidation [P127; ]	0.0272465	0.00124455	1	1	2	Q9DCX2	Q9DCX2 [124-144]	0	2983.54	0					No Quan Values	High	High	High	High	High	High	High	High	High	High	High	High	3.44	3.44	0.0003886	0.001124	0.007828	0.01631	2.11	1
High	ATP synthase subunit d, mitochondrial OS=Mus musculus OX=10090 GN=Atp5pd PE=1 SV=3	[R].LASLSEKPPAIDWAYYR.[A]	2xOxidation [P8; P9]; 1xTMT6plex [K7]; 1xTMT6plex [N-Term]	Q9DCX2 2xOxidation [P49; P50]	5.88618e-05	0	1	2	15	Q9DCX2	Q9DCX2 [42-58]	0	2470.34	0	2752.8	2705.3	5.38	7.44		High	High	High	High	High	High	High	High	High	High	High	High	-0.32	-0.32	0	0	0.0001091	5.471e-06	4.77	5	2694	2812.9	2926.7	2617.9	2534.1	2580.8	2705.3	2764	3003.1	2471.8
Medium	ATP synthase subunit e, mitochondrial OS=Mus musculus OX=10090 GN=Atp5me PE=1 SV=2	[M].VPPVQVSPLIK.[F]	1xDeamidated [Q5]; 1xOxidation [P2]; 1xTMT6plex [K11]; 1xTMT6plex [N-Term]	Q06185 1xOxidation [P3]	0.316727	0.0243342	1	1	1	Q06185	Q06185 [2-12]	0	1652.04	0					No Quan Values	High	High	High	High	High	High	High	High	High	High	High	n/a	1.04		0.007839		0.128			32
Medium	ATP synthase subunit f, mitochondrial OS=Mus musculus OX=10090 GN=Atp5mf PE=1 SV=3	[K].LGELPSWIMMR.[D]	3xOxidation [P5; M9; M10]; 1xTMT6plex [N-Term]	P56135 3xOxidation [P21; ]	0.180397	0.0129355	1	2	2	P56135	P56135 [17-27]	0	1609.83	0	58.1	60.8	4.33	8.7		High	High	High	High	High	High	High	High	High	High	High	High	0.45	0.45	0.003934	0.007708	0.06642	0.1188	2.5	6	57.7	54	61.2	58.6	59.1	68.9	55.5	60.8	56.8	62.3
High	ATP synthase subunit g, mitochondrial OS=Mus musculus OX=10090 GN=Atp5mg PE=1 SV=1	[K].VELVPPTPAEIPTAIQSVK.[K]	1xOxidation [P]; 1xTMT6plex [K19]; 1xTMT6plex [N-Term]	Q9CPQ8 1xOxidation [P]	4.83775e-06	0	1	1	4	Q9CPQ8	Q9CPQ8 [36-54]	0	2463.45	0	132	143.9	13.75	11.76		High	High	High	High	High	High	High	High	High	High	High	High	0.5	0.5	0	0	5.005e-07	1.299e-05	4.71	26	147	109.6	162.1	129.6	122.7	141	143.9	124	170.9	153.7
High	ATP synthase subunit O, mitochondrial OS=Mus musculus OX=10090 GN=Atp5po PE=1 SV=1	[R].GEVPCTVTTASPLDDAVLSELK.[T]	1xCarbamidomethyl [C5]; 1xOxidation [P]; 1xTMT6plex [K22]; 1xTMT6plex [N-Term]	Q9DB20 1xOxidation [P]	1.51574e-06	0	1	2	54	Q9DB20	Q9DB20 [137-158]	0	2776.47	0	2589.2	2686.8	3.32	2.68		High	High	High	High	High	High	High	High	High	High	High	High	-1.56	0.16	0	0	4.574e-07	3.922e-05	6.99	59	2536.2	2544.2	2634.9	2509.8	2657.7	2551.5	2709.6	2628.3	2725.8	2686.8
High	ATP synthase-coupling factor 6, mitochondrial OS=Mus musculus OX=10090 GN=Atp5pf PE=1 SV=1	[R].QASGGPVDIGPEYQQDLDR.[E]	1xOxidation [P11]; 1xTMT6plex [N-Term]	P97450 1xOxidation [P65]	4.61931e-09	0	1	2	2	P97450	P97450 [55-73]	0	2290.11	0	59.8	65	8.49	9.39		High	High	High	High	High	High	High	High	High	High	High	High	2.11	2.11	0	0	2.079e-10	3.498e-09	5.77	54	58	55.1	68.2	61.6	64.9	68.9	65	56	59.1	69.5
Medium	ATP-dependent RNA helicase DHX8 OS=Mus musculus OX=10090 GN=Dhx8 PE=2 SV=1	[K].TGIDQLVVTPISQAQAK.[Q]	1xDeamidated [Q5]; 1xOxidation [P10]; 1xTMT6plex [K17]; 1xTMT6plex [N-Term]	A2A4P0 1xOxidation [P902]	0.22741	0.0167785	1	2	1	A2A4P0	A2A4P0 [893-909]	0	2244.29	0	145.7	150	12.37	5.71		High	High	High	High	High	High	High	High	High	High	n/a	High		0.11		0.005246		0.07557	2.87		137.7	120.5	168.7	149.9	141.6	150	154.5	166	148.3	142.8
Medium	AT-rich interactive domain-containing protein 3B OS=Mus musculus OX=10090 GN=Arid3b PE=1 SV=1	[R].ATPMSSLLPVPGLSPQGQQTK.[E]	2xOxidation [P3; P9]; 1xTMT6plex [K21]; 1xTMT6plex [N-Term]	Q9Z1N7 2xOxidation [P134; P140]	0.373552	0.0310775	1	6	1	Q9Z1N7	Q9Z1N7 [132-152]	0	2627.45	0					No Quan Values	High	High	High	High	High	High	High	High	High	High	Low	High	3.48	-0.9	0.2146	0.009992	1	0.1519	2.6	1
Medium	AT-rich interactive domain-containing protein 5B OS=Mus musculus OX=10090 GN=Arid5b PE=1 SV=3	[R].AVSPLDPAK.[E]	2xOxidation [P4; P7]; 1xTMT6plex [K9]; 1xTMT6plex [N-Term]	Q8BM75 2xOxidation [P1033; P1036]	0.505526	0.0487559	1	2	1	Q8BM75	Q8BM75 [1030-1038]	0	1387.82	0	214.1	269.6	26.52	100.31		Medium	Medium	Medium	Medium	Medium	Medium	Medium	Medium	Medium	Medium	Low	Medium	1.46	1.46	0.1128	0.01795	0.6617	0.232	2.26	10	213.2	341.6	215	170	190.7	269.6	164.1	128.8	426	1189.4
High	BAG family molecular chaperone regulator 3 OS=Mus musculus OX=10090 GN=Bag3 PE=1 SV=2	[K].VSSAPIPCPSPSPAPSAVPSPPK.[N]	1xCarbamidomethyl [C8]; 5xOxidation [P13; P15; P19; P21; P22]; 1xTMT6plex [K23]; 1xTMT6plex [N-Term]	Q9JLV1 5xOxidation [P383; P385; P389; P391; P392]	0.000598303	0	1	1	5	Q9JLV1	Q9JLV1 [371-393]	0	2765.44	0	333.2	291.5	9.71	15.16		High	High	High	High	High	High	High	High	High	High	High	n/a	-3.62		0		0.00011			12	316.7	265.1	329.1	349.8	347.8	291.5	283.6	272.9	388.5	298.4
Medium	BAH and coiled-coil domain-containing protein 1 OS=Mus musculus OX=10090 GN=Bahcc1 PE=1 SV=1	[K].AANEGHPPSEAPTPSLSPK.[V]	3xOxidation [P12; P14; P]; 1xTMT6plex [K19]; 1xTMT6plex [N-Term]	E9Q7G4 3xOxidation [P2074; P2076; P]	0.412016	0.0358705	1	2	3	E9Q7G4	E9Q7G4 [2063-2081]	0	2393.23	0	1350.8	1092.6	9.99	9.32		Medium	Medium	Medium	Medium	Medium	Medium	Medium	Medium	Medium	Medium	n/a	Medium		4.74		0.01183		0.1772	2.94		1351.3	1286.2	1350.3	1630	1244.7	1092.6	1176	1051.4	1178.4	933.8
High	Basement membrane-specific heparan sulfate proteoglycan core protein OS=Mus musculus OX=10090 GN=Hspg2 PE=1 SV=1	[R].VEGGAVPLESSVLVTIEPAGTAPGVIPPVR.[I]	1xOxidation [P23]; 1xTMT6plex [N-Term]	E9PZ16 1xOxidation [P2431]	1.63359e-06	0	1	2	1	E9PZ16	E9PZ16 [2409-2438]	0	3156.77	0	9.6	11.3	22.38	7.45		High	High	High	High	High	High	High	High	High	High	n/a	High		3.27		0		5.199e-08	5.13		9.9	7	9.4	6.6	9.8	11.1	11.3	10.9	13	12.3
High	B-cell CLL/lymphoma 6 member B protein OS=Mus musculus OX=10090 GN=Bcl6b PE=1 SV=1	[R].GILTDVTLLVGGQPLR.[A]	1xDeamidated [Q13]; 1xOxidation [P14]; 1xTMT6plex [N-Term]	O88282 1xOxidation [P48]	0.092357	0.00666075	1	2	3	O88282	O88282 [35-50]	0	1898.12	0	14.5	16.3	15.65	11.91		High	High	High	High	High	High	High	High	High	High	n/a	High		-0.26		0.001752		0.02371	1.67		16.7	14	13.7	15	13.7	13.9	17.2	19.2	16.3	15.8
Medium	Beta-adrenergic receptor kinase 1 OS=Mus musculus OX=10090 GN=Grk2 PE=1 SV=2	[R].SPVVELSK.[V]	1xOxidation [P2]; 1xTMT6plex [K8]; 1xTMT6plex [N-Term]	Q99MK8 1xOxidation [P671]	0.407059	0.0353009	1	1	1	Q99MK8	Q99MK8 [670-677]	0	1332.81	0					No Quan Values	Medium	Medium	Medium	Medium	Medium	Medium	Medium	Medium	Medium	Medium	Medium	n/a	4.35		0.01133		0.1695			19
High	Beta-enolase OS=Mus musculus OX=10090 GN=Eno3 PE=1 SV=3	[K].DATNVGDEGGFAPNILENNEALELLK.[T]	1xDeamidated [N]; 1xOxidation [P13]; 1xTMT6plex [K26]; 1xTMT6plex [N-Term]	P21550 1xOxidation [P215]	8.64959e-10	0	1	2	6	P21550	P21550 [203-228]	0	3218.65	0	451	445.7	5.02	7.11		High	High	High	High	High	High	High	High	High	High	High	High	11.21	11.21	0	0	2.018e-10	1.634e-08	7.43	63	470.9	432.3	458.5	410.6	443.6	445.7	460.9	486.2	417.9	409
Medium	Beta-enolase OS=Mus musculus OX=10090 GN=Eno3 PE=1 SV=3	[K].SPDDPAR.[H]	1xOxidation [P5]; 1xTMT6plex [N-Term]	P21550 1xOxidation [P267]	0.407059	0.0353009	1	1	2	P21550	P21550 [263-269]	0	1002.51	0					No Quan Values	Medium	Medium	Medium	Medium	Medium	Medium	Medium	Medium	Medium	Medium	Medium	Low	-1.14	-7.6	0.01136	0.7671	0.1698	1	0.87	8
High	Beta-enolase OS=Mus musculus OX=10090 GN=Eno3 PE=1 SV=3	[K].DATNVGDEGGFAPNILENNEALELLK.[T]	2xDeamidated [N14; N]; 1xOxidation [P13]; 1xTMT6plex [K26]; 1xTMT6plex [N-Term]	P21550 1xOxidation [P215]	0.0196756	0.000893475	1	2	2	P21550	P21550 [203-228]	0	3219.63	0	18.2	23.5	12.93	21.37		High	High	High	High	High	High	High	High	High	High	High	High	13.16	13.16	0.0002852	0.0002662	0.005607	0.003608	3	3	18.7	21.6	17.8	15.6	15.3	23.5	15.2	18.1	24.4	26.1
High	Beta-enolase OS=Mus musculus OX=10090 GN=Eno3 PE=1 SV=3	[R].HIADLAGNPDLVLPVPAFNVINGGSHAGNK.[L]	2xDeamidated [N22; N29]; 1xOxidation [P14]; 1xTMT6plex [K30]; 1xTMT6plex [N-Term]	P21550 1xOxidation [P146]	0.0139012	0.000629802	1	2	1	P21550	P21550 [133-162]	0	3483.86	0					No Quan Values	High	High	High	High	High	High	High	High	High	High	n/a	High		8.09		0.0001969		0.002402	5.39
High	Bifunctional epoxide hydrolase 2 OS=Mus musculus OX=10090 GN=Ephx2 PE=1 SV=2	[R].DFLLGAYQTEFPEGPTEQLMK.[G]	1xDeamidated [Q]; 1xOxidation [P/M]; 1xTMT6plex [K21]; 1xTMT6plex [N-Term]	P34914 1xOxidation [P]	4.28354e-06	0	1	1	4	P34914	P34914 [35-55]	0	2889.46	0	64.9	63.4	6.74	7.19		High	High	High	High	High	High	High	High	High	High	High	High	2.65	2.65	0	0	9.574e-07	1.615e-07	5.25	38	67.8	58.3	63.3	63.1	70.8	55.4	63.4	60.1	63.6	67.2
High	Bifunctional epoxide hydrolase 2 OS=Mus musculus OX=10090 GN=Ephx2 PE=1 SV=2	[R].AVASLNTPFMPPDPDVSPMK.[V]	1xOxidation [P/M]; 1xTMT6plex [K20]; 1xTMT6plex [N-Term]	P34914 1xOxidation [P]	5.21596e-08	0	1	3	50	P34914	P34914 [352-371]	0	2588.35	0	1774.8	1580.9	7.85	6.02		High	High	High	High	High	High	High	High	High	High	High	High	3.21	2.47	0	0	8.554e-09	3.356e-06	5.84	49	1589	1769.4	1909.1	1753.7	1780.2	1508.9	1580.7	1580.9	1769.6	1598.9
High	Bifunctional glutamate/proline--tRNA ligase OS=Mus musculus OX=10090 GN=Eprs PE=1 SV=4	[K].TELAEPIAIRPTSETVMYPAYAK.[W]	1xOxidation [P/M]; 1xTMT6plex [K23]; 1xTMT6plex [N-Term]	Q8CGC7 1xOxidation [P]	2.08365e-06	0	1	1	2	Q8CGC7	Q8CGC7 [1110-1132]	0	3025.63	0	140.1	144.1	8.03	3.92		High	High	High	High	High	High	High	High	High	High	High	High	0.33	0.33	0	0	1.948e-07	2.16e-05	4.72	30	136.7	143.5	152.1	127.3	127	152.6	149.7	139.4	144.1	140.9
High	Blood vessel epicardial substance OS=Mus musculus OX=10090 GN=Bves PE=1 SV=1	[K].MKPIEEGVEDDDEVFVSPDALK.[V]	1xOxidation [P/M]; 2xTMT6plex [K2; K22]; 1xTMT6plex [N-Term]	Q9ES83 1xOxidation [P]	4.7946e-08	0	1	1	12	Q9ES83	Q9ES83 [332-353]	0	3165.65	0	651.4	703.9	5.83	4.96		High	High	High	High	High	High	High	High	High	High	High	High	2.87	-0.41	0	0	1.537e-08	5.775e-08	5.86	34	582.1	647.4	683.6	619.1	655.4	743.3	740.8	703.9	659.7	692
Medium	Brachyury 2 OS=Mus musculus OX=10090 GN=T2 PE=4 SV=1	[R].GTLAPARR.[T]	1xOxidation [P5]; 1xTMT6plex [N-Term]	A0A338P791 1xOxidation [P352]	0.474796	0.0446876	1	2	1	A0A338P791	A0A338P791 [348-355]	1	1086.66	0					No Quan Values	Medium	Medium	Medium	Medium	Medium	Medium	Medium	Medium	Medium	Medium	n/a	Medium		-2.61		0.01576		0.2125	1.83
High	Branched-chain-amino-acid aminotransferase, mitochondrial OS=Mus musculus OX=10090 GN=Bcat2 PE=1 SV=2	[R].LCLPDFDKQELLECIR.[Q]	2xCarbamidomethyl [C2; C14]; 1xOxidation [P4]; 1xTMT6plex [K8]; 1xTMT6plex [N-Term]	O35855 1xOxidation [P138]	0.00103736	5.03951e-05	1	2	4	O35855	O35855 [135-150]	1	2523.34	0	486.4	432.7	6.82	15.65		High	High	High	High	High	High	High	High	High	High	High	High	1.04	2.06	0	0.0002534	0.0002042	0.003491	3.78	3	482.7	416.2	469.6	494.2	509.4	402.7	422.6	467.4	584.2	432.7
High	Branched-chain-amino-acid aminotransferase, mitochondrial OS=Mus musculus OX=10090 GN=Bcat2 PE=1 SV=2	[R].EVFGSGTACQVCPVHQILYEGK.[Q]	2xCarbamidomethyl [C9; C12]; 1xDeamidated [Q]; 1xOxidation [P13]; 1xTMT6plex [K22]; 1xTMT6plex [N-Term]	O35855 1xOxidation [P347]	6.59101e-08	0	1	3	2	O35855	O35855 [335-356]	0	2954.48	0					No Quan Values	High	High	High	High	High	High	High	High	High	High	High	High	7.42	7.42	0	0	4.071e-09	2.136e-06	5.77	72
High	Branched-chain-amino-acid aminotransferase, mitochondrial OS=Mus musculus OX=10090 GN=Bcat2 PE=1 SV=2	[R].EVFGSGTACQVCPVHQILYEGK.[Q]	2xCarbamidomethyl [C9; C12]; 1xOxidation [P13]; 1xTMT6plex [K22]; 1xTMT6plex [N-Term]	O35855 1xOxidation [P347]	5.72882e-09	0	1	3	6	O35855	O35855 [335-356]	0	2953.5	0	291.5	291.8	2.96	12.52		High	High	High	High	High	High	High	High	High	High	High	High	-0.1	1.02	0	0	1.88e-09	4.108e-08	7.31	62	288	284.1	287.2	295.2	304.3	246.4	287.2	294.4	349.7	291.8
High	Cadherin-2 OS=Mus musculus OX=10090 GN=Cdh2 PE=1 SV=2	[K].YDEEGGGEEDQDYDLSQLQQPDTVEPDAIKPVGIR.[R]	1xDeamidated [Q17]; 1xOxidation [P21]; 1xTMT6plex [K30]; 1xTMT6plex [N-Term]	P15116 1xOxidation [P793]	3.29671e-07	0	1	2	2	P15116	P15116 [773-807]	0	4381.09	0	28.5	30.9	13.33	11.49		High	High	High	High	High	High	High	High	High	High	High	High	7.48	7.48	0	0	2.469e-08	5.835e-08	5.34	23	27.3	33.3	29.8	23.1	25.2	37.4	31.5	28.3	30.9	28.8
Medium	Cadherin-9 OS=Mus musculus OX=10090 GN=Cdh9 PE=1 SV=1	[K].EGSIIGQVTAYDPDAMNNIIK.[Y]	3xDeamidated [Q7; N17; N18]; 1xOxidation [P13]; 1xTMT6plex [K21]; 1xTMT6plex [N-Term]	F8WHU6 1xOxidation [P409]	0.48862	0.0467412	1	2	1	F8WHU6	F8WHU6 [397-417]	0	2726.38	0	19	16.3	7.83	8.07		Medium	Medium	Medium	Medium	Medium	Medium	Medium	Medium	Medium	Medium	n/a	Medium		-0.45		0.01676		0.2213	1.17		20.1	18.3	17.2	19.7	20.9	18.2	16	16.3	14.9	17.8
High	Calcium-binding mitochondrial carrier protein Aralar1 OS=Mus musculus OX=10090 GN=Slc25a12 PE=1 SV=1	[R].VGGINLLTAGALAGVPAASLVTPADVIK.[T]	1xDeamidated [N5]; 1xOxidation [P16]; 1xTMT6plex [K28]; 1xTMT6plex [N-Term]	Q8BH59 1xOxidation [P531]	9.7687e-10	0	1	1	4	Q8BH59	Q8BH59 [516-543]	0	3063.81	0	88.3	78.9	9.77	11.86		High	High	High	High	High	High	High	High	High	High	High	High	12.3	12.3	0	0	5.754e-08	2.117e-06	5.56	25	88.7	101.3	80.2	95.5	87.9	81.5	77.1	78.9	86.9	62.3
Medium	Calcium-binding mitochondrial carrier protein Aralar1 OS=Mus musculus OX=10090 GN=Slc25a12 PE=1 SV=1	[R].IADLPPANPDHIGGYR.[L]	1xDeamidated [N8]; 2xOxidation [P5; P6]; 1xTMT6plex [N-Term]	Q8BH59 2xOxidation [P629; P630]	0.348667	0.0282967	1	1	2	Q8BH59	Q8BH59 [625-640]	0	1968	0	236.5	250.5	3.37	5.12		High	High	High	High	High	High	High	High	High	High	High	Medium	4.53	4.53	0.00914	0.02772	0.1429	0.3197	2.46	7	238.2	253.7	234.8	234.9	244.9	263.2	246.2	232.4	263	250.5
High	Calponin-1 OS=Mus musculus OX=10090 GN=Cnn1 PE=1 SV=1	[R].GPAYGLSAEVK.[N]	1xOxidation [P2]; 1xTMT6plex [K11]; 1xTMT6plex [N-Term]	Q08091 1xOxidation [P10]	0.000411787	0	1	1	1	Q08091	Q08091 [9-19]	0	1565.89	1	160.2	186.1	11.36	12.2		High	High	High	High	High	High	High	High	High	High	High	n/a	2.98		0		7.241e-05			31	197.9	155.4	165.1	176.6	145.7	188.2	161	160.2	186.1	213.5
High	Calreticulin OS=Mus musculus OX=10090 GN=Calr PE=1 SV=1	[K].IDNSQVESGSLEDDWDFLPPK.[K]	2xOxidation [P19; P20]; 1xTMT6plex [K21]; 1xTMT6plex [N-Term]	P14211 2xOxidation [P204; P205]	1.7442e-06	0	1	1	2	P14211	P14211 [186-206]	0	2881.41	0	158.5	162.2	5.41	9.05		High	High	High	High	High	High	High	High	High	High	High	High	0.2	0.2	0	0	1.595e-07	3.374e-05	4.61	36	155.8	167.2	155.1	161.2	163.5	162.8	162.2	137.4	140.5	167.2
High	Calreticulin OS=Mus musculus OX=10090 GN=Calr PE=1 SV=1	[K].KPEDWDEEMDGEWEPPVIQNPEYK.[G]	3xOxidation [P15; P/M]; 2xTMT6plex [K1; K24]; 1xTMT6plex [N-Term]	P14211 3xOxidation [P263; P]	1.91532e-06	0	1	1	4	P14211	P14211 [249-272]	0	3695.77	0	178	170.1	3.61	10.6		High	High	High	High	High	High	High	High	High	High	High	High	-0.19	-0.19	0	0.001453	1.776e-07	0.02073	4.61	38	180.2	176.6	179.5	172.6	169.8	203.2	194.9	170.1	164.8	161.2
Medium	Carbonic anhydrase 1 OS=Mus musculus OX=10090 GN=Ca1 PE=1 SV=4	[K].LYPIANGNNQSPIDIK.[T]	3xDeamidated [N6; N8; N9]; 1xOxidation [P12]; 1xTMT6plex [K16]; 1xTMT6plex [N-Term]	P13634 1xOxidation [P31]	0.424595	0.0374702	1	1	2	P13634	P13634 [20-35]	0	2234.2	0	122	118.4	16.57	4.4		Medium	Medium	Medium	Medium	Medium	Medium	Medium	Medium	Medium	Medium	n/a	Medium		-0.17		0.01222		0.1808	2.09		113.9	136.5	122.2	121.9	92	118.4	122	109.8	122.6	116.4
High	Carbonic anhydrase 13 OS=Mus musculus OX=10090 GN=Ca13 PE=1 SV=1	[K].QPISISSQQLAR.[F]	1xOxidation [P2]; 1xTMT6plex [N-Term]	Q9D6N1 1xOxidation [P216]	0.0334649	0.00193525	1	1	2	Q9D6N1	Q9D6N1 [215-226]	0	1572.89	0	77.9	78.5	7.45	11.35		High	High	High	High	High	High	High	High	High	High	High	Medium	2.09	2.09	0.0005562	0.01648	0.009839	0.219	3.23	15	78.6	86.9	74.1	69.5	78.9	78.5	74.5	74.7	79.4	96.7
High	Carbonyl reductase [NADPH] 1 OS=Mus musculus OX=10090 GN=Cbr1 PE=1 SV=3	[K].SPEEGAETPVYLALLPPDAEGPHGQFVQDK.[K]	1xDeamidated [Q25]; 1xOxidation [P17]; 1xTMT6plex [K30]; 1xTMT6plex [N-Term]	P48758 1xOxidation [P259]	1.89701e-05	0	1	1	1	P48758	P48758 [243-272]	0	3666.86	0	49.1	49.2	10.46	9.59		High	High	High	High	High	High	High	High	High	High	High	n/a	14.96		0		2.297e-06			29	55.4	46.6	53	45.4	51.7	43.9	49.2	46.2	55.2	53.5
Medium	Cardiomyopathy-associated protein 5 OS=Mus musculus OX=10090 GN=Cmya5 PE=1 SV=1	[K].SELGSGLPLPSMSTSEVLRPEPK.[L]	1xOxidation [P20]; 1xTMT6plex [K23]; 1xTMT6plex [N-Term]	E9QLJ0 1xOxidation [P1523]	0.392444	0.0331757	1	1	1	E9QLJ0	E9QLJ0 [1504-1526]	0	2885.57	0	84.2	73.9	10.43	16.12		Medium	Medium	Medium	Medium	Medium	Medium	Medium	Medium	Medium	Medium	n/a	Medium		0.08		0.01064		0.1628	3.02		67	79.5	80.5	88.9	88.1	61.7	66.9	73.9	93	79.3
High	Cardiomyopathy-associated protein 5 OS=Mus musculus OX=10090 GN=Cmya5 PE=1 SV=2	[R].EESSPCRPVFEDLSLPPSADK.[T]	1xCarbamidomethyl [C6]; 1xOxidation [P16]; 1xTMT6plex [K21]; 1xTMT6plex [N-Term]	Q70KF4 1xOxidation [P1254]	0.000587235	0	1	1	2	Q70KF4	Q70KF4 [1239-1259]	0	2834.43	0					No Quan Values	High	High	High	High	High	High	High	High	High	High	High	n/a	12.44		0		0.0001075			12
High	Carnitine O-palmitoyltransferase 2, mitochondrial OS=Mus musculus OX=10090 GN=Cpt2 PE=1 SV=2	[R].DSTQTPAIAPQSQPAATDSSVSVQK.[L]	1xDeamidated [Q4]; 1xOxidation [P10]; 1xTMT6plex [K25]; 1xTMT6plex [N-Term]	P52825 1xOxidation [P399]	0.00280622	0.000252531	1	1	1	P52825	P52825 [390-414]	0	2989.54	0	34.5	27.6	20.96	13.65		High	High	High	High	High	High	High	High	High	High	High	n/a	15		5.759e-05		0.0006164			32	42	32.8	37.4	21.7	30.4	26	27.6	25.2	35	28.4
Medium	Cartilage intermediate layer protein 2 OS=Mus musculus OX=10090 GN=Cilp2 PE=1 SV=1	[R].LVVTFVDPSGDFVDSVR.[V]	1xOxidation [P8]; 1xTMT6plex [N-Term]	D3Z7H8 1xOxidation [P528]	0.27945	0.0212729	1	1	1	D3Z7H8	D3Z7H8 [521-537]	0	2097.11	0					No Quan Values	High	High	High	High	High	High	High	High	High	High	n/a	High		-1.51		0.006686		0.1008	1.31
Medium	Cartilage intermediate layer protein 2 OS=Mus musculus OX=10090 GN=Cilp2 PE=1 SV=1	[R].FAPAEQVQGVVVTLLNLEPAPGFTANPR.[A]	3xDeamidated [Q6; Q8; N26]; 1xOxidation [P21]; 1xTMT6plex [N-Term]	D3Z7H8 1xOxidation [P775]	0.33348	0.026401	1	1	2	D3Z7H8	D3Z7H8 [755-782]	0	3183.68	0	8.8	10.4	26.45	12.36		High	High	High	High	High	High	High	High	High	High	n/a	High		-1.73		0.008421		0.1293	1.57		13.3	10.8	8.2	7.4	6.6	10.2	13.1	11.9	9.8	10.4
Medium	Cation-transporting ATPase 13A2 OS=Mus musculus OX=10090 GN=Atp13a2 PE=2 SV=3	[R].LQQELAEHPWPTLPVGSVR.[-]	2xDeamidated [Q2; Q3]; 1xOxidation [P14]; 1xTMT6plex [N-Term]	Q9CTG6 1xOxidation [P1164]	0.378212	0.0315764	1	1	1	Q9CTG6	Q9CTG6 [1151-1169]	0	2404.27	0	55.9	51.9	33.74	43.8		Medium	Medium	Medium	Medium	Medium	Medium	Medium	Medium	Medium	Medium	n/a	Medium		3.04		0.01008		0.1534	2.59		43.2	90	71.1	36.6	63.4	110.4	44.5	57.5	51.9	47.5
High	Caveolae-associated protein 1 OS=Mus musculus OX=10090 GN=Cavin1 PE=1 SV=1	[-].MEDVTLHIVERPYSGFPDASSEGPEPTQGEAR.[A]	1xAcetyl [N-Term]; 1xOxidation [P12]; 1xTMT6plex [N-Term]	O54724 1xAcetyl [N-Term]; 1xOxidation [P12]	0.135995	0.00973065	1	1	1	O54724	O54724 [1-32]	0	3788.79	0					No Quan Labels	High	High	High	High	High	High	High	High	High	High	n/a	High		4.29		0.002946		0.03838	4.36
High	Caveolin-1 OS=Mus musculus OX=10090 GN=Cav1 PE=1 SV=1	[K].IDFEDVIAEPEGTHSFDGIWK.[A]	1xOxidation [P10]; 1xTMT6plex [K21]; 1xTMT6plex [N-Term]	P49817 1xOxidation [P75]	8.88445e-05	0	1	3	4	P49817	P49817 [66-86]	0	2879.45	0	131	133.9	5.86	6.09		High	High	High	High	High	High	High	High	High	High	High	High	-1	-1	0	1.196e-05	1.296e-05	0.0001018	3.85	21	135.6	134.2	133.6	115.2	128.5	139.1	133.9	122.7	121.1	134.7
Medium	Centrosomal protein of 120 kDa OS=Mus musculus OX=10090 GN=Cep120 PE=1 SV=1	[K].LQCFALDPQTSAK.[E]	1xCarbamidomethyl [C3]; 1xDeamidated [Q9]; 1xOxidation [P8]; 1xTMT6plex [K13]; 1xTMT6plex [N-Term]	Q7TSG1 1xOxidation [P84]	0.445274	0.0405564	1	3	2	Q7TSG1	Q7TSG1 [77-89]	0	1954.04	0	127.1	124.8	5.67	10.55		Medium	Medium	Medium	Medium	Medium	Medium	Medium	Medium	Medium	Medium	Medium	Medium	1.02	0.35	0.04037	0.01359	0.4549	0.1935	1.89	19	118.8	122.7	133.7	127.9	126.2	146.8	115.7	114.4	132.5	124.8
Medium	Centrosomal protein of 128 kDa OS=Mus musculus OX=10090 GN=Cep128 PE=1 SV=2	[K].VLTSGPQLHYDPHR.[W]	1xOxidation [P12]; 1xTMT6plex [N-Term]	Q8BI22 1xOxidation [P862]	0.499853	0.0481149	1	1	1	Q8BI22	Q8BI22 [851-864]	0	1864.99	0					No Quan Values	Medium	Medium	Medium	Medium	Medium	Medium	Medium	Medium	Medium	Medium	Medium	n/a	9.53		0.01559		0.213			8
Medium	cGMP-inhibited 3',5'-cyclic phosphodiesterase A OS=Mus musculus OX=10090 GN=Pde3a PE=1 SV=1	[K].LADINGPAK.[DC]	1xDeamidated [N5]; 1xOxidation [P7]; 1xTMT6plex [K9]; 1xTMT6plex [N-Term]	Q9Z0X4 1xOxidation [P954]	0.161166	0.011481	1	3	1	Q9Z0X4	Q9Z0X4 [948-956]	0	1373.8	0					No Quan Values	High	High	High	High	High	High	High	High	High	High	n/a	High		-0.72		0.003532		0.04776	2.59
Medium	Chromodomain-helicase-DNA-binding protein 7 OS=Mus musculus OX=10090 GN=Chd7 PE=1 SV=1	[K].FILPNVSTPVSDAFK.[S]	2xOxidation [P4; P9]; 1xTMT6plex [K15]; 1xTMT6plex [N-Term]	A2AJK6 2xOxidation [P2457; P2462]	0.217952	0.0159539	1	2	6	A2AJK6	A2AJK6 [2454-2468]	0	2125.19	0	19.1	16.5	15.82	18.67		High	High	High	High	High	High	High	High	High	High	High	Medium	-4.19	-3.71	0.00484	0.01569	0.08232	0.2119	1.85	1	20	18.3	21.4	16.6	22.2	21.5	13.1	15.1	16.5	17.7
Medium	Chromodomain-helicase-DNA-binding protein 9 OS=Mus musculus OX=10090 GN=Chd9 PE=1 SV=2	[K].VGGAFAPPLK.[D]	1xOxidation [P7]; 1xTMT6plex [K10]; 1xTMT6plex [N-Term]	Q8BYH8 1xOxidation [P2568]	0.502685	0.0484172	1	2	1	Q8BYH8	Q8BYH8 [2562-2571]	0	1430.88	0	184	217.5	18.87	10		Medium	Medium	Medium	Medium	Medium	Medium	Medium	Medium	Medium	Medium	Low	Medium	-1.71	-0.05	0.4171	0.01773	1	0.2298	1.95	7	178.5	175.5	226	135	189.6	208.8	203.9	217.5	228.7	260.1
Medium	Citrate synthase, mitochondrial OS=Mus musculus OX=10090 GN=Cs PE=1 SV=1 Citrate synthase OS=Mus musculus OX=10090 GN=Csl PE=1 SV=1	[R].GYSIPECQK.[ML]	1xCarbamidomethyl [C7]; 1xOxidation [P5]; 1xTMT6plex [K9]; 1xTMT6plex [N-Term]	Q9CZU6 1xOxidation [P99]; Q80X68 1xOxidation [P99]	0.312639	0.0238485	2	2	18	Q9CZU6; Q80X68	Q9CZU6 [95-103]; Q80X68 [95-103]	0	1555.82	0	1623.8	1639.9	4.19	1.29	Shared	High	High	High	High	High	High	High	High	High	High	High	Medium	-0.9	0.62	0.007694	0.03104	0.1261	0.3534	2.02	6	1553	1550.8	1713.1	1671.9	1589.2	1639.9	1649.5	1658.3	1611.3	1613.8
Medium	Citrate synthase, mitochondrial OS=Mus musculus OX=10090 GN=Cs PE=1 SV=1 Citrate synthase OS=Mus musculus OX=10090 GN=Csl PE=1 SV=1	[K].GLVYETSVLDPDEGIR.[F]	1xOxidation [P11]; 1xTMT6plex [N-Term]	Q9CZU6 1xOxidation [P87]; Q80X68 1xOxidation [P87]	0.273878	0.0207657	2	2	2	Q9CZU6; Q80X68	Q9CZU6 [77-92]; Q80X68 [77-92]	0	2008.04	0	91.8	90.9	8.51	5.73	Shared	High	High	High	High	High	High	High	High	High	High	High	High	2.57	2.57	0.008172	0.006557	0.1319	0.09777	2.11	6	82.6	89.3	99	102.2	94.4	90.9	85	96.7	94.5	85.7
High	Citrate synthase, mitochondrial OS=Mus musculus OX=10090 GN=Cs PE=1 SV=1 Citrate synthase OS=Mus musculus OX=10090 GN=Csl PE=1 SV=1	[R].VVPGYGHAVLR.[K]	1xOxidation [P3]; 1xTMT6plex [N-Term]	Q9CZU6 1xOxidation [P343]; Q80X68 1xOxidation [P343]	0.000877117	5.03951e-05	2	2	4	Q9CZU6; Q80X68	Q9CZU6 [341-351]; Q80X68 [341-351]	0	1412.82	0	361.1	382.6	20.58	15.68	Shared	High	High	High	High	High	High	High	High	High	High	High	High	-1.42	-1.42	0	0.0003281	0.0001685	0.004531	4.08	36	510.7	374.6	420	302.2	312.9	428	336.2	463.7	319.9	382.6
High	Clathrin heavy chain 1 OS=Mus musculus OX=10090 GN=Cltc PE=1 SV=3	[R].LPVVIGGLLDVDCSEDVIK.[N]	1xCarbamidomethyl [C13]; 1xOxidation [P2]; 1xTMT6plex [K19]; 1xTMT6plex [N-Term]	Q68FD5 1xOxidation [P813]	0.137064	0.0097757	1	2	1	Q68FD5	Q68FD5 [812-830]	0	2515.41	0	17.2	20.1	19.95	15.67		High	High	High	High	High	High	High	High	High	High	n/a	High		-0.99		0.00296		0.03851	1.34		11.6	21.1	15.9	18.6	15.8	20.2	17.5	19.5	26.2	20.1
High	Clathrin heavy chain 1 OS=Mus musculus OX=10090 GN=Cltc PE=1 SV=3	[R].LLEMNLMHAPQVADAILGNQMFTHYDR.[A]	1xOxidation [P10]; 1xTMT6plex [N-Term]	Q68FD5 1xOxidation [P593]	1.08217e-06	0	1	2	2	Q68FD5	Q68FD5 [584-610]	0	3373.67	0					No Quan Values	High	High	High	High	High	High	High	High	High	High	High	High	-1.13	-1.13	0	0	9.351e-08	3.743e-08	5.51	20
High	Cofilin-1 OS=Mus musculus OX=10090 GN=Cfl1 PE=1 SV=3	[K].EILVGDVGQTVDDPYTTFVK.[M]	1xDeamidated [Q9]; 1xOxidation [P14]; 1xTMT6plex [K20]; 1xTMT6plex [N-Term]	P18760 1xOxidation [P67]	4.36303e-05	0	1	2	2	P18760	P18760 [54-73]	0	2671.41	0	52.1	42.4	11.84	16.55		High	High	High	High	High	High	High	High	High	High	High	High	14.31	14.31	0	2.328e-05	5.865e-06	0.0004012	4.87	40	49.9	54.9	55.9	43.5	42.5	56.1	42.4	37.8	42.3	52.1
High	Cofilin-1 OS=Mus musculus OX=10090 GN=Cfl1 PE=1 SV=3	[K].KEDLVFIFWAPENAPLK.[S]	2xOxidation [P11; P15]; 2xTMT6plex [K1; K17]; 1xTMT6plex [N-Term]	P18760 2xOxidation [P106; P110]	0.00113866	5.03951e-05	1	2	3	P18760	P18760 [96-112]	1	2736.56	0	211.7	219.7	6.34	4.49		High	High	High	High	High	High	High	High	High	High	High	High	-0.13	-1.34	5.7e-06	0.004554	0.0002249	0.06444	4.19	11	225.2	215.9	203	194.9	207.6	207.3	233.7	225.9	216.3	219.7
High	Cofilin-2 OS=Mus musculus OX=10090 GN=Cfl2 PE=1 SV=1	[K].QILVGDIGDTVEDPYTSFVK.[L]	1xDeamidated [Q1]; 1xOxidation [P14]; 1xTMT6plex [K20]; 1xTMT6plex [N-Term]	P45591 1xOxidation [P67]	0.000741556	2.60064e-05	1	1	2	P45591	P45591 [54-73]	0	2671.41	0	54.5	53.9	10.28	11.14		High	High	High	High	High	High	High	High	High	High	High	High	14.3	14.3	0	0.0001156	0.0001399	0.00161	3.96	21	60.4	56.8	56.3	45.8	52.7	55.7	48.1	52.8	53.9	64.8
High	Cofilin-2 OS=Mus musculus OX=10090 GN=Cfl2 PE=1 SV=1	[K].KEDLVFIFWAPESAPLK.[S]	2xOxidation [P11; P15]; 2xTMT6plex [K1; K17]; 1xTMT6plex [N-Term]	P45591 2xOxidation [P106; P110]	0.00179656	0.000188861	1	1	3	P45591	P45591 [96-112]	1	2709.55	0	193.9	193.5	6.43	4.28		High	High	High	High	High	High	High	High	High	High	High	High	-0.3	-0.3	4.271e-05	6.55e-05	0.0003771	0.0009696	4.74	15	203.9	187.3	194	168.1	193.8	203.5	193.5	193.9	185.5	182.6
Medium	Coiled-coil domain-containing 166 OS=Mus musculus OX=10090 GN=Ccdc166 PE=4 SV=1	[K].AQATPQSVPTSR.[G]	1xDeamidated [Q2]; 2xOxidation [P5; P9]; 1xTMT6plex [N-Term]	S4R181 2xOxidation [P302; P306]	0.327123	0.0255616	1	1	1	S4R181	S4R181 [298-309]	0	1504.78	0					No Quan Values	High	High	High	High	High	High	High	High	High	High	n/a	High		-7.01		0.008205		0.1258	1.46
High	Coiled-coil domain-containing protein 17 OS=Mus musculus OX=10090 GN=Ccdc17 PE=2 SV=1	[R].GALQTLGAHFQALQLQPR.[K]	3xDeamidated [Q4; Q11; Q14]; 1xOxidation [P17]; 1xTMT6plex [N-Term]	Q8CE13 1xOxidation [P169]	0.0204043	0.000931629	1	1	2	Q8CE13	Q8CE13 [153-170]	0	2197.18	0	882.6	785	3.56	6.13		High	High	High	High	High	High	High	High	High	High	High	High	1.42	1.42	0.005628	0.0002662	0.09459	0.00376	3.32	0	861.6	838	859.8	909.2	911.1	785	834.1	778.3	856.7	732.7
Medium	Coiled-coil-helix-coiled-coil-helix domain-containing protein 2 OS=Mus musculus OX=10090 GN=Chchd2 PE=2 SV=1	[R].APAAQPPAAAAPSAVGSPAAAPR.[Q]	2xOxidation [P2; P6]; 1xTMT6plex [N-Term]	Q9D1L0 2xOxidation [P30; P34]	0.201393	0.0145368	1	3	1	Q9D1L0	Q9D1L0 [29-51]	0	2258.21	0	33.8	30	15.26	8.02		High	High	High	High	High	High	High	High	High	High	n/a	High		-0.52		0.004522		0.06376	3.06		34.4	40.4	30.7	45.3	33.1	28.9	30	29.6	35.1	31.7
High	Collagen alpha-1(I) chain OS=Mus musculus OX=10090 GN=Col1a1 PE=1 SV=4	[K].GEPGDTGVK.[G]	1xOxidation [P3]; 1xTMT6plex [K9]; 1xTMT6plex [N-Term]	P11087 1xOxidation [P818]	0.000644693	0	1	1	4	P11087	P11087 [816-824]	0	1333.74	0	260.5	252.6	37.48	12.56		High	High	High	High	High	High	High	High	High	High	High	High	0.41	1.64	0	1.196e-05	0.0001219	0.0001428	3.46	26	473.6	248	306	186.8	194.4	303.2	242.3	216.4	268.5	252.6
High	Collagen alpha-1(I) chain OS=Mus musculus OX=10090 GN=Col1a1 PE=1 SV=4	[K].GTAGEPGK.[A]	1xOxidation [P6]; 1xTMT6plex [K8]; 1xTMT6plex [N-Term]	P11087 1xOxidation [P581]	0.00334744	0.000252531	1	2	4	P11087	P11087 [576-583]	0	1190.68	0	232.8	254.2	34.2	11.97		High	High	High	High	High	High	High	High	High	High	High	High	-0.88	-0.88	6.197e-05	9.038e-05	0.0007483	0.001327	2.84	28	419	205.9	264.5	188.9	189.8	276.2	254.2	201.6	231.4	262.8
Medium	Collagen alpha-1(I) chain OS=Mus musculus OX=10090 GN=Col1a1 PE=1 SV=4	[K].GADGSPGK.[D]	1xOxidation [P6]; 1xTMT6plex [K8]; 1xTMT6plex [N-Term]	P11087 1xOxidation [P746]	0.194194	0.0140189	1	2	2	P11087	P11087 [741-748]	0	1162.65	0	77.1	91.2	23.22	17.33		High	High	High	High	High	High	High	High	High	High	High	High	-2.23	-2.23	0.004264	0.004414	0.07211	0.06229	2.14	15	119.2	65.8	78.9	71.4	75.4	96.2	92.4	63	73	91.2
High	Collagen alpha-1(I) chain OS=Mus musculus OX=10090 GN=Col1a1 PE=1 SV=4	[R].GVQGPPGPAGPR.[G]	1xOxidation [P6]; 1xTMT6plex [N-Term]	P11087 1xOxidation [P680]	0.00285881	0.000252531	1	2	2	P11087	P11087 [675-686]	0	1334.74	0	105.5	112.1	36.42	13.93		High	High	High	High	High	High	High	High	High	High	High	High	-0.53	-0.53	0.0001199	1.78e-05	0.001182	0.0003635	4.17	53	190.8	90.7	122.7	81.7	80.4	125.5	112.1	84.6	108.7	116.3
High	Collagen alpha-1(I) chain OS=Mus musculus OX=10090 GN=Col1a1 PE=1 SV=4	[K].GSPGEAGRPGEAGLPGAK.[G]	3xOxidation [P3; P9; P15]; 1xTMT6plex [K18]; 1xTMT6plex [N-Term]	P11087 3xOxidation [P512; P518; P524]	8.80171e-05	0	1	2	2	P11087	P11087 [510-527]	0	2114.12	0	73	68.7	35.54	14.44		High	High	High	High	High	High	High	High	High	High	High	High	2.52	2.52	0	0	3.43e-05	5.824e-06	3.58	21	124.2	67.7	78.9	53.9	49.5	74.6	65.2	50.6	68.7	73
High	Collagen alpha-1(III) chain OS=Mus musculus OX=10090 GN=Col3a1 PE=1 SV=4	[K].NGETGPQGPPGPTGPAGDK.[G]	1xDeamidated [N1]; 1xOxidation [P10]; 1xTMT6plex [K19]; 1xTMT6plex [N-Term]	P08121 1xOxidation [P619]	3.62015e-07	0	1	1	2	P08121	P08121 [610-628]	0	2209.11	0	82	88.8	18.33	9.77		High	High	High	High	High	High	High	High	High	High	High	High	1.05	1.05	0	0	2.744e-08	1.345e-07	6.28	54	109.9	76.4	88.6	71.8	67.8	97.2	87.3	73.9	90.8	88.8
High	Collagen alpha-1(III) chain OS=Mus musculus OX=10090 GN=Col3a1 PE=1 SV=4	[K].GEVGPAGSPGSNGSPGQR.[G]	1xDeamidated [N12]; 2xOxidation [P9; P15]; 1xTMT6plex [N-Term]	P08121 2xOxidation [P358; P364]	6.46878e-08	0	1	1	2	P08121	P08121 [350-367]	0	1872.89	0	32.9	41.7	9	7.57		High	High	High	High	High	High	High	High	High	High	High	High	-0.3	-0.3	0	0	3.968e-09	5.61e-09	6.14	55	33.8	30	38	31.5	31.9	39.6	41.7	42.8	43.5	35.9
High	Collagen alpha-1(III) chain OS=Mus musculus OX=10090 GN=Col3a1 PE=1 SV=4	[K].GEDGKDGSPGEPGANGLPGAAGER.[G]	1xDeamidated [N15]; 3xOxidation [P9; P12; P18]; 1xTMT6plex [K5]; 1xTMT6plex [N-Term]	P08121 3xOxidation [P469; P472; P478]	4.93017e-07	0	1	1	2	P08121	P08121 [461-484]	1	2702.29	0	54.8	59.8	34.58	15.49		High	High	High	High	High	High	High	High	High	High	High	High	1.53	1.53	0	0	5.251e-08	1.255e-08	4.93	32	102.9	51	56.4	53.3	42.4	59.8	56.1	49.5	73.5	68
High	Collagen alpha-1(III) chain OS=Mus musculus OX=10090 GN=Col3a1 PE=1 SV=4	[R].GLPGPPGNNGNPGPPGPSGAPGK.[D]	1xDeamidated [N8]; 5xOxidation [P3; P5; P6; P17; P21]; 1xTMT6plex [K23]; 1xTMT6plex [N-Term]	P08121 5xOxidation [P880; P882; P883; P894; P898]	0.00103736	5.03951e-05	1	1	1	P08121	P08121 [878-900]	0	2532.27	0	79.7	79.7	21.2	8.18		High	High	High	High	High	High	High	High	High	High	High	n/a	2.43		0		0.0002041			13	114	70.1	82.6	76.9	65	89.5	79.7	78.9	82.5	71.3
High	Collagen alpha-1(III) chain OS=Mus musculus OX=10090 GN=Col3a1 PE=1 SV=4	[K].GNDGAPGKNGER.[G]	1xDeamidated [N9]; 1xOxidation [P6]; 1xTMT6plex [K8]; 1xTMT6plex [N-Term]	P08121 1xOxidation [P589]	0.0137742	0.000629802	1	1	3	P08121	P08121 [584-595]	1	1646.85	0	59.9	63.9	31.26	12.4		High	High	High	High	High	High	High	High	High	High	High	High	1.19	0.74	0.0002015	0.0003325	0.003625	0.004654	1.94	5	110.5	61.5	73.7	52.2	57.7	59.3	74.2	53.5	67.6	63.9
High	Collagen alpha-1(III) chain OS=Mus musculus OX=10090 GN=Col3a1 PE=1 SV=4	[R].GPPGPAGTNGIPGTR.[G]	1xDeamidated [N9]; 2xOxidation [P12; P]; 1xTMT6plex [N-Term]	P08121 2xOxidation [P424; P]	1.6801e-06	0	1	1	2	P08121	P08121 [413-427]	0	1610.83	0	77.1	80.5	31.9	9.7		High	High	High	High	High	High	High	High	High	High	High	High	1	1	0	0	1.532e-07	4.589e-06	3.69	64	129.6	67.3	88.2	58.7	62.9	84.7	80.5	65.6	75.7	82.3
High	Collagen alpha-1(III) chain OS=Mus musculus OX=10090 GN=Col3a1 PE=1 SV=4	[R].GETGPAGPSGAPGPAGAR.[G]	1xOxidation [P12]; 1xTMT6plex [N-Term]	P08121 1xOxidation [P1075]	6.65299e-08	0	1	1	2	P08121	P08121 [1064-1081]	0	1751.89	0					No Quan Values	High	High	High	High	High	High	High	High	High	High	High	High	-1.57	-1.57	0	0	4.121e-09	2.006e-09	6.02	31
High	Collagen alpha-1(III) chain OS=Mus musculus OX=10090 GN=Col3a1 PE=1 SV=4	[R].GAPGPQGPR.[G]	1xOxidation [P3]; 1xTMT6plex [N-Term]	P08121 1xOxidation [P1084]	0.130753	0.00938446	1	1	2	P08121	P08121 [1082-1090]	0	1081.6	0	31.3	30.8	21.33	11.82		High	High	High	High	High	High	High	High	High	High	Medium	High	0.01	0.01	0.02403	0.002793	0.3018	0.03638	2.36	27	45.2	30.1	32.7	28.4	25.1	29.6	34.1	24.7	30.8	32.3
High	Collagen alpha-1(III) chain OS=Mus musculus OX=10090 GN=Col3a1 PE=1 SV=4	[R].GGAGPPGPEGGK.[G]	1xOxidation [P6]; 1xTMT6plex [K12]; 1xTMT6plex [N-Term]	P08121 1xOxidation [P700]	0.00512811	0.000414721	1	2	2	P08121	P08121 [695-706]	0	1454.8	0					No Quan Values	High	High	High	High	High	High	High	High	High	High	High	High	1.45	1.45	0.0002233	4.981e-05	0.003919	0.0007293	2.3	2
High	Collagen alpha-1(III) chain OS=Mus musculus OX=10090 GN=Col3a1 PE=1 SV=4	[K].GNDGAPGK.[N]	1xOxidation [P6]; 1xTMT6plex [K8]; 1xTMT6plex [N-Term]	P08121 1xOxidation [P589]	0.00418213	0.000314697	1	1	4	P08121	P08121 [584-591]	0	1189.66	0	240.9	255	36.39	11.7		High	High	High	High	High	High	High	High	High	High	High	High	1.39	1.39	9.615e-05	8.139e-05	0.0009594	0.001119	2.63	35	452	229.5	258.9	190.1	200.6	278.5	255	212.4	239.2	285.3
Medium	Collagen alpha-1(III) chain OS=Mus musculus OX=10090 GN=Col3a1 PE=1 SV=4	[R].GPSGEPGK.[N]	1xOxidation [P6]; 1xTMT6plex [K8]; 1xTMT6plex [N-Term]	P08121 1xOxidation [P433]	0.483061	0.0458132	1	1	2	P08121	P08121 [428-435]	0	1202.68	0					No Quan Values	Medium	Medium	Medium	Medium	Medium	Medium	Medium	Medium	Medium	Medium	Medium	Medium	0.06	0.06	0.02013	0.01625	0.2599	0.2169	2.25	12
High	Collagen alpha-1(III) chain OS=Mus musculus OX=10090 GN=Col3a1 PE=1 SV=4	[K].GDAGQPGEK.[G]	1xOxidation [P6]; 1xTMT6plex [K9]; 1xTMT6plex [N-Term]	P08121 1xOxidation [P928]	0.000169417	0	1	1	4	P08121	P08121 [923-931]	0	1332.72	0	265.1	275.1	44.01	8.78		High	High	High	High	High	High	High	High	High	High	High	High	-0.11	1.43	0	8.139e-05	2.68e-05	0.001122	3.52	49	555.4	239	321.3	198.9	205.7	296.7	277.5	231.9	269.5	275.1
High	Collagen alpha-1(III) chain OS=Mus musculus OX=10090 GN=Col3a1 PE=1 SV=4	[R].GPAGPIGPPGPAGQPGDK.[G]	2xOxidation [P]; 1xTMT6plex [K18]; 1xTMT6plex [N-Term]	P08121 2xOxidation [P775; P]	1.84494e-06	0	1	2	2	P08121	P08121 [761-778]	0	2060.12	0	105.5	109.6	24.81	10.82		High	High	High	High	High	High	High	High	High	High	High	High	-0.16	-0.16	0	0	1.705e-07	6.668e-06	5.38	65	164.7	93.6	120.2	86.7	104	128.6	109.6	95.2	108	110
Medium	Collagen alpha-1(III) chain OS=Mus musculus OX=10090 GN=Col3a1 PE=1 SV=4	[K].GEGGPPGPAGPTGSSGPAGPPGPQGVK.[G]	2xOxidation [P17; P20]; 1xTMT6plex [K27]; 1xTMT6plex [N-Term]	P08121 2xOxidation [P849; P852]	0.142515	0.0102526	1	2	1	P08121	P08121 [833-859]	0	2757.42	0					No Quan Values	High	High	High	High	High	High	High	High	High	High	n/a	High		-1.19		0.003112		0.04056	2.6
High	Collagen alpha-1(III) chain OS=Mus musculus OX=10090 GN=Col3a1 PE=1 SV=4	[R].GGPGSPGPK.[G]	2xOxidation [P3; P6]; 1xTMT6plex [K9]; 1xTMT6plex [N-Term]	P08121 2xOxidation [P733; P736]	0.0683005	0.00490055	1	1	2	P08121	P08121 [731-739]	0	1243.7	0	72.3	64.2	32.12	18.15		High	High	High	High	High	High	High	High	High	High	High	High	1.21	1.21	0.002311	0.001128	0.03584	0.01633	2.5	27	130.9	85.7	73.1	60.2	64.4	64.2	87.2	56.4	60.3	74.3
High	Collagen alpha-1(III) chain OS=Mus musculus OX=10090 GN=Col3a1 PE=1 SV=4	[R].GRPGLPGAAGAR.[G]	2xOxidation [P3; P6]; 1xTMT6plex [N-Term]	P08121 2xOxidation [P310; P313]	0.0130356	0.000571576	1	1	3	P08121	P08121 [308-319]	0	1340.76	0					No Quan Values	High	High	High	High	High	High	High	High	High	High	High	High	0.53	0.53	0.0002356	0.0001884	0.004262	0.002206	3.19	15
High	Collagen alpha-1(III) chain OS=Mus musculus OX=10090 GN=Col3a1 PE=1 SV=4	[R].DGTPGGPGIR.[G]	2xOxidation [P4; P7]; 1xTMT6plex [N-Term]	P08121 2xOxidation [P529; P532]	0.000299691	0	1	1	2	P08121	P08121 [526-535]	0	1187.62	0	76.5	67.3	41.15	17.67		High	High	High	High	High	High	High	High	High	High	High	High	0.07	0.07	0	1.196e-05	5.061e-05	9.067e-05	3.21	43	159.9	98.6	65.5	84.2	69.5	77.2	67.3	54.4	55.7	80.1
High	Collagen alpha-1(III) chain OS=Mus musculus OX=10090 GN=Col3a1 PE=1 SV=4	[R].GEAGSPGIPGPK.[G]	2xOxidation [P6; P9]; 1xTMT6plex [K12]; 1xTMT6plex [N-Term]	P08121 2xOxidation [P454; P457]	9.67208e-07	0	1	1	4	P08121	P08121 [449-460]	0	1556.87	0	86.2	97.9	38.57	10.64		High	High	High	High	High	High	High	High	High	High	High	High	3.03	3.03	0	0	8.192e-08	3.082e-07	3.98	55	161.6	79.9	98.1	61.7	67.6	100.2	93.4	76.2	99.2	97.9
High	Collagen alpha-1(III) chain OS=Mus musculus OX=10090 GN=Col3a1 PE=1 SV=4	[K].GEVGAPGAPGGK.[G]	2xOxidation [P6; P9]; 1xTMT6plex [K12]; 1xTMT6plex [N-Term]	P08121 2xOxidation [P667; P670]	2.12344e-07	0	1	2	2	P08121	P08121 [662-673]	0	1486.83	0	164.6	163	47.59	12.72		High	High	High	High	High	High	High	High	High	High	High	High	1.02	1.02	0	0	1.501e-08	8.764e-09	3.95	59	348.8	155.2	185.4	109.7	120.3	177.2	186.7	133.7	153.5	163
High	Collagen alpha-1(III) chain OS=Mus musculus OX=10090 GN=Col3a1 PE=1 SV=4	[R].GPPGTAGIPGAR.[G]	2xOxidation [P9; P]; 1xTMT6plex [N-Term]	P08121 2xOxidation [P691; P]	0.000555242	0	1	2	6	P08121	P08121 [683-694]	0	1311.72	0	114.8	114.4	30.75	8.79		High	High	High	High	High	High	High	High	High	High	High	High	-0.01	-0.01	0	0	0.0001009	6.693e-05	3.2	37	182.1	113.5	121.1	81.9	86.1	117	114.4	95.4	120	108.2
High	Collagen alpha-1(III) chain OS=Mus musculus OX=10090 GN=Col3a1 PE=1 SV=4	[R].GSPGGPGTAGFPGGR.[G]	3xOxidation [P3; P6; P12]; 1xTMT6plex [N-Term]	P08121 3xOxidation [P865; P868; P874]	3.86327e-05	0	1	2	2	P08121	P08121 [863-877]	0	1548.76	0	100.5	89.9	25.11	26.55		High	High	High	High	High	High	High	High	High	High	High	High	-0.1	-0.1	0	0	1.729e-05	2.21e-06	4.34	36	147.5	76.5	94.2	84.8	107.2	82.7	95.1	73.1	89.9	139.1
High	Collagen alpha-1(III) chain OS=Mus musculus OX=10090 GN=Col3a1 PE=1 SV=4	[K].DGPPGPAGNSGSPGNPGIAGPK.[G]	3xOxidation [P6; P13; P16]; 1xTMT6plex [K22]; 1xTMT6plex [N-Term]	P08121 3xOxidation [P906; P913; P916]	1.13402e-06	0	1	1	2	P08121	P08121 [901-922]	0	2407.23	0	56.2	51.4	14.05	16.5		High	High	High	High	High	High	High	High	High	High	High	High	3.33	3.33	0	0	9.836e-08	4.336e-08	4.82	43	71.2	52.7	57.5	55	59.5	67.2	55.9	50.9	43.1	51.4
High	Collagen alpha-1(III) chain OS=Mus musculus OX=10090 GN=Col3a1 PE=1 SV=4	[K].GPAGPPGPPGASGSPGLQGMPGER.[G]	4xOxidation [P2; P9; P15; P21]; 1xTMT6plex [N-Term]	P08121 4xOxidation [P708; P715; P721; P727]	9.58385e-08	0	1	1	1	P08121	P08121 [707-730]	0	2421.17	0	78.4	82.1	14.18	5.07		High	High	High	High	High	High	High	High	High	High	High	n/a	-0.64		0		6.183e-09			59	97.4	69.9	91.6	69.8	81.5	89	80.1	82.1	78.9	86.1
High	Collagen alpha-1(IV) chain OS=Mus musculus OX=10090 GN=Col4a1 PE=1 SV=4	[R].GDPGTPGVPGK.[D]	2xOxidation [P3; P6]; 1xTMT6plex [K11]; 1xTMT6plex [N-Term]	P02463 2xOxidation [P971; P974]	0.00195334	0.000188861	1	2	2	P02463	P02463 [969-979]	0	1471.82	0	110.2	110.9	13.22	6.62		High	High	High	High	High	High	High	High	High	High	High	High	1.84	1.84	7.168e-05	1.196e-05	0.0008581	0.0002319	2.97	24	115.9	119	121.4	82.8	104.8	110.9	109.5	97.9	112.3	117.7
Medium	Collagen alpha-1(IV) chain OS=Mus musculus OX=10090 GN=Col4a1 PE=1 SV=4	[R].GYPGAPGLR.[G]	2xOxidation [P3; P6]; 1xTMT6plex [N-Term]	P02463 2xOxidation [P349; P352]	0.325024	0.0252483	1	2	2	P02463	P02463 [347-355]	0	1148.63	0					No Quan Values	High	High	High	High	High	High	High	High	High	High	Medium	High	0.98	0.98	0.02077	0.008063	0.266	0.1242	2.66	14
High	Collagen alpha-1(IV) chain OS=Mus musculus OX=10090 GN=Col4a1 PE=1 SV=4	[R].GPPGGVGFPGSR.[G]	2xOxidation [P3; P9]; 1xTMT6plex [N-Term]	P02463 2xOxidation [P588; P594]	0.000125592	0	1	2	4	P02463	P02463 [586-597]	0	1345.71	0	257.6	248.6	5.8	7.1		High	High	High	High	High	High	High	High	High	High	High	High	1.7	1.7	0	0	2.971e-05	8.87e-06	3.33	37	291.4	253.4	272.4	253.3	252.9	250.1	246	245.4	248.6	287.9
High	Collagen alpha-1(IV) chain OS=Mus musculus OX=10090 GN=Col4a1 PE=1 SV=4	[R].GSPGIPGDSGYPGLPGR.[Q]	4xOxidation [P3; P6; P12; P15]; 1xTMT6plex [N-Term]	P02463 4xOxidation [P301; P304; P310; P313]	2.33312e-10	0	1	1	1	P02463	P02463 [299-315]	0	1876.92	0	107.9	123.7	7.52	7.72		High	High	High	High	High	High	High	High	High	High	High	n/a	1.18		0		7.31e-12			82	124.8	110.8	103.3	103.1	105	117.6	126.5	113.8	123.7	138.7
High	Collagen alpha-1(IV) chain OS=Mus musculus OX=10090 GN=Col4a1 PE=1 SV=4	[K].VVPLPGPPGAAGLPGSPGFPGPQGDR.[G]	5xOxidation [P7; P8; P14; P17; P20]; 1xTMT6plex [N-Term]	P02463 5xOxidation [P647; P648; P654; P657; P660]	1.01374e-07	0	1	1	2	P02463	P02463 [641-666]	0	2703.39	0	136.3	132.4	8.01	3.57		High	High	High	High	High	High	High	High	High	High	High	n/a	-0.9		0		1.422e-07			49	140	119.1	142	119.8	141.3	128.9	132.4	130	137.1	140.2
Medium	Collagen alpha-1(IX) chain OS=Mus musculus OX=10090 GN=Col9a1 PE=2 SV=2	[R].GMQGEQGATGLPGIQGPPGR.[A]	1xDeamidated [Q3]; 3xOxidation [P12; P17; P18]; 1xTMT6plex [N-Term]	Q05722 3xOxidation [P747; P752; P753]	0.29278	0.0222434	1	1	1	Q05722	Q05722 [736-755]	0	2186.07	0	178.7	180.2	2.28	6.51		High	High	High	High	High	High	High	High	High	High	High	n/a	5.4		0.007076		0.1168			2	174.9	181.1	181.2	176.3	184.9	166	194.9	185.7	180.2	170.1
High	Collagen alpha-1(VI) chain OS=Mus musculus OX=10090 GN=Col6a1 PE=1 SV=1	[R].GDPGEAGPQGDQGR.[E]	1xOxidation [P3]; 1xTMT6plex [N-Term]	Q04857 1xOxidation [P444]	0.00611478	0.000425444	1	1	4	Q04857	Q04857 [442-455]	0	1585.74	0	58.3	53.9	8.57	46.72		High	High	High	High	High	High	High	High	High	High	High	High	1.48	1.48	0.0002469	5.5e-05	0.004959	0.0009066	2.84	31	55.1	56.4	69	60	61.7	53.9	38.4	56.9	110.6	45.9
High	Collagen alpha-1(VI) chain OS=Mus musculus OX=10090 GN=Col6a1 PE=1 SV=1	[R].GDPGYEGER.[G]	1xOxidation [P3]; 1xTMT6plex [N-Term]	Q04857 1xOxidation [P264]	0.00043553	0	1	1	6	Q04857	Q04857 [262-270]	0	1224.57	0	89.8	84.8	18.31	68.12		High	High	High	High	High	High	High	High	High	High	High	High	-0.2	-0.2	0	6.99e-06	7.674e-05	7.197e-05	2.87	24	96.7	99.9	69.9	117	83.4	84.8	78.5	84.9	263.3	82
High	Collagen alpha-1(VI) chain OS=Mus musculus OX=10090 GN=Col6a1 PE=1 SV=1	[R].GDEGPPGPEGLR.[G]	1xOxidation [P6]; 1xTMT6plex [N-Term]	Q04857 1xOxidation [P483]	8.56219e-06	0	1	1	2	Q04857	Q04857 [478-489]	0	1425.72	0	206.4	187.4	12.18	57.07		High	High	High	High	High	High	High	High	High	High	High	High	0.01	0.01	0	0	9.497e-07	1.7e-06	3.64	47	247.6	213.1	181.5	232.9	199.9	184.4	165.1	187.4	491.9	189.7
Medium	Collagen alpha-1(VII) chain OS=Mus musculus OX=10090 GN=Col7a1 PE=1 SV=3	[R].GLTGTPGEPGVK.[G]	1xOxidation [P9]; 1xTMT6plex [K12]; 1xTMT6plex [N-Term]	Q63870 1xOxidation [P1489]	0.447906	0.0408988	1	1	1	Q63870	Q63870 [1481-1492]	0	1586.92	0					No Quan Values	Medium	Medium	Medium	Medium	Medium	Medium	Medium	Medium	Medium	Medium	n/a	Medium		-1.06		0.01372		0.1948	1.51
Medium	Collagen alpha-1(X) chain OS=Mus musculus OX=10090 GN=Col10a1 PE=2 SV=1	[K].TGYPGEPGLNGPK.[G]	1xOxidation [P7]; 1xTMT6plex [K13]; 1xTMT6plex [N-Term]	Q05306 1xOxidation [P394]	0.36664	0.0301802	1	1	1	Q05306	Q05306 [388-400]	0	1760.96	0					No Quan Values	High	High	High	High	High	High	High	High	High	High	n/a	High		0.47		0.009517		0.1469	2.08
High	Collagen alpha-1(XII) chain OS=Mus musculus OX=10090 GN=Col12a1 PE=2 SV=3	[R].VQIALAQYSGDPR.[T]	1xDeamidated [Q7]; 1xOxidation [P12]; 1xTMT6plex [N-Term]	Q60847 1xOxidation [P1247]	0.0737082	0.00530476	1	6	2	Q60847	Q60847 [1236-1248]	0	1663.89	0	132.2	143.2	7.73	6.94		High	High	High	High	High	High	High	High	High	High	High	High	0.31	0.31	0.001599	0.007813	0.02397	0.1207	2.18	6	128.3	119.4	136.3	141.1	124.5	150.8	146.2	129	143.2	130.5
High	Collagen alpha-1(XV) chain OS=Mus musculus OX=10090 GN=Col15a1 PE=1 SV=2	[R].GADGTSTMGPPGPR.[G]	1xOxidation [P11]; 1xTMT6plex [N-Term]	O35206 1xOxidation [P774]	5.7266e-07	0	1	2	2	O35206	O35206 [764-777]	0	1545.75	0	115.3	111.9	35.07	42.52		High	High	High	High	High	High	High	High	High	High	High	High	-0.18	-0.18	0	0	4.596e-08	7.804e-08	4.12	46	97.5	119.7	111.1	104.1	220.9	111.9	109.7	100.1	117.5	237.8
High	Collagen alpha-1(XV) chain OS=Mus musculus OX=10090 GN=Col15a1 PE=1 SV=2	[R].GLPGPPGK.[N]	2xOxidation [P3; P6]; 1xTMT6plex [K8]; 1xTMT6plex [N-Term]	O35206 2xOxidation [P688; P691]	0.107032	0.00773972	1	2	2	O35206	O35206 [686-693]	0	1212.74	0					No Quan Values	High	High	High	High	High	High	High	High	High	High	High	Medium	1.47	1.47	0.002332	0.01343	0.03631	0.1917	2.62	13
Medium	Collagen alpha-1(XXIII) chain OS=Mus musculus OX=10090 GN=Col23a1 PE=2 SV=2	[R].GAQGPAGPRGEPGQDGEMGPK.[G]	3xOxidation [P8; P12; M18]; 1xTMT6plex [K21]; 1xTMT6plex [N-Term]	Q8K4G2 3xOxidation [P204; P208; P]	0.373552	0.0310775	1	1	3	Q8K4G2	Q8K4G2 [197-217]	1	2499.23	0	123.4	144.1	17.67	12.52		High	High	High	High	High	High	High	High	High	High	High	Medium	2.37	-0.96	0.009888	0.04317	0.1542	0.4862	2.8	4	120.6	163.8	126.3	98.6	111.7	146.9	171.1	144.1	120.2	141
Medium	Collagen alpha-2(I) chain OS=Mus musculus OX=10090 GN=Col1a2 PE=1 SV=2	[K].GEPGAPGENGTPGQAGAR.[G]	2xDeamidated [N9; Q14]; 1xOxidation [P6]; 1xTMT6plex [N-Term]	Q01149 1xOxidation [P210]	0.179061	0.0128578	1	1	1	Q01149	Q01149 [205-222]	0	1869.88	0	93.7	89.6	8.05	9.03		High	High	High	High	High	High	High	High	High	High	n/a	High		3.21		0.004037		0.05503	2.91		105.9	88.7	100.5	89.5	87.1	89.6	87.9	88.6	108.1	92.2
Medium	Collagen alpha-2(I) chain OS=Mus musculus OX=10090 GN=Col1a2 PE=1 SV=2	[K].GPSGDPGKPGER.[G]	2xOxidation [P6; P9]; 1xTMT6plex [K8]; 1xTMT6plex [N-Term]	Q01149 2xOxidation [P510; P513]	0.216405	0.0158801	1	1	1	Q01149	Q01149 [505-516]	0	1643.88	0					No Quan Values	High	High	High	High	High	High	High	High	High	High	n/a	High		0.28		0.005021		0.07076	1.99
High	Collagen alpha-2(I) chain OS=Mus musculus OX=10090 GN=Col1a2 PE=1 SV=2	[K].GEQGPAGPPGFQGLPGPSGTTGEVGKPGER.[G]	3xOxidation [P17; P]; 1xTMT6plex [K26]; 1xTMT6plex [N-Term]	Q01149 3xOxidation [P566; P]	0.000116536	0	1	1	2	Q01149	Q01149 [550-579]	0	3324.69	0	43.7	44.7	15.82	5.87		High	High	High	High	High	High	High	High	High	High	High	High	2.96	2.96	0	0	0.0001317	8.168e-06	4.53	27	57.1	36.9	43.3	44.2	39.6	42.2	44.3	44.7	47.9	48.7
High	Collagen alpha-2(I) chain OS=Mus musculus OX=10090 GN=Col1a2 PE=1 SV=2	[R].GLPGIAGALGEPGPLGISGPPGAR.[G]	3xOxidation [P3; P12; P]; 1xTMT6plex [N-Term]	Q01149 3xOxidation [P891; P900; P]	3.52128e-09	0	1	1	2	Q01149	Q01149 [889-912]	0	2388.31	0	53.2	56.1	12.11	2.91		High	High	High	High	High	High	High	High	High	High	High	High	1.75	1.75	0	0	1.524e-10	1.59e-07	4.72	56	65.5	48.9	58.4	53.1	53.3	58.8	56.7	55.1	56.1	54.7
High	Collagen alpha-2(I) chain OS=Mus musculus OX=10090 GN=Col1a2 PE=1 SV=2	[K].GPSGEPGTAGAPGTAGPQGLLGAPGILGLPGSR.[G]	4xOxidation [P2; P12; P24; P30]; 1xTMT6plex [N-Term]	Q01149 4xOxidation [P854; P864; P876; P882]	1.54438e-06	0	1	1	1	Q01149	Q01149 [853-885]	0	3160.64	0	130.8	108.1	9.53	16.23		High	High	High	High	High	High	High	High	High	High	High	n/a	7.45		0		1.386e-07			6	137.8	113.5	125.7	148	121.9	112.3	106.2	108.1	144.3	95.5
High	Collagen alpha-2(IV) chain OS=Mus musculus OX=10090 GN=Col4a2 PE=1 SV=4	[R].GQPGAVGPQGYNGPPGLQGFPGLQGR.[K]	1xDeamidated [N12]; 3xOxidation [P15; P]; 1xTMT6plex [N-Term]	P08122 3xOxidation [P75; P]	2.78558e-07	0	1	1	2	P08122	P08122 [61-86]	0	2784.39	0	228	237.2	4.45	7.23		High	High	High	High	High	High	High	High	High	High	High	High	2.91	2.91	0	0.0001156	2.034e-08	0.001616	3.73	50	228.8	226.7	252.3	225.1	227.2	234.7	244.6	238.4	237.2	202.2
High	Collagen alpha-2(IV) chain OS=Mus musculus OX=10090 GN=Col4a2 PE=1 SV=4	[R].GGVSAVPGFR.[G]	1xOxidation [P7]; 1xTMT6plex [N-Term]	P08122 1xOxidation [P1444]	0.0337637	0.00197221	1	1	2	P08122	P08122 [1438-1447]	0	1191.67	0	189.7	192.7	6.96	4.9		High	High	High	High	High	High	High	High	High	High	High	High	-1.11	-1.11	0.001387	0.0004956	0.02113	0.00692	2.67	17	182	206.1	188.5	205.1	171.9	192.3	207.1	192.7	188.6	210.1
High	Collagen alpha-2(IV) chain OS=Mus musculus OX=10090 GN=Col4a2 PE=1 SV=4	[R].GIPGEVLGAQPGTR.[G]	2xOxidation [P3; P11]; 1xTMT6plex [N-Term]	P08122 2xOxidation [P768; P776]	2.68269e-06	0	1	1	2	P08122	P08122 [766-779]	0	1612.89	0	181.9	192.3	8.87	2.73		High	High	High	High	High	High	High	High	High	High	High	High	2.81	2.81	0	0	2.572e-07	1.569e-07	4.7	44	210.8	184.3	166.5	179.6	193.3	191.2	195.3	181.6	192.3	192.5
High	Collagen alpha-2(IV) chain OS=Mus musculus OX=10090 GN=Col4a2 PE=1 SV=4	[R].GDPGFQGAHGEPGSR.[G]	2xOxidation [P3; P12]; 1xTMT6plex [N-Term]	P08122 2xOxidation [P363; P372]	0.0011281	5.03951e-05	1	1	2	P08122	P08122 [361-375]	0	1729.81	0	167.2	143.1	14.97	10.51		High	High	High	High	High	High	High	High	High	High	High	High	0.12	0.12	0.0001346	1.196e-05	0.001897	0.00012	2.98	12	171.9	188.7	155.1	181.6	162.7	153.5	141.5	166.2	143.1	124.8
High	Collagen alpha-2(IV) chain OS=Mus musculus OX=10090 GN=Col4a2 PE=1 SV=4	[R].GLPGALGEIGPQGPPGDPGFR.[G]	3xOxidation [P3; P]; 1xTMT6plex [N-Term]	P08122 3xOxidation [P1408; P]	8.16696e-05	0	1	1	2	P08122	P08122 [1406-1426]	0	2266.17	0					No Quan Values	High	High	High	High	High	High	High	High	High	High	High	High	1.08	1.08	0	5.5e-05	1.181e-05	0.0009224	3.46	11
High	Collagen alpha-2(IV) chain OS=Mus musculus OX=10090 GN=Col4a2 PE=1 SV=4	[R].GEPGEPGTAGPPGPSVGDEDSMR.[G]	3xOxidation [P3; P6; P]; 1xTMT6plex [N-Term]	P08122 3xOxidation [P378; P381; P]	9.86246e-11	0	1	1	2	P08122	P08122 [376-398]	0	2473.1	0	32.3	38.1	11.66	15.66		High	High	High	High	High	High	High	High	High	High	High	High	1.4	1.4	0	0	2.79e-12	1.534e-09	6.38	77	32.3	41.9	31.6	33.6	32.4	34.2	39.1	28	38.1	43.2
High	Collagen alpha-2(IV) chain OS=Mus musculus OX=10090 GN=Col4a2 PE=1 SV=4	[R].EGPLGQPGSPGLGGLPGDR.[G]	3xOxidation [P7; P10; P16]; 1xTMT6plex [N-Term]	P08122 3xOxidation [P851; P854; P860]	6.65029e-06	0	1	1	2	P08122	P08122 [845-863]	0	2038.04	0	117.7	105.3	7.31	24.8		High	High	High	High	High	High	High	High	High	High	High	High	-1.14	-1.14	0	0	7.13e-07	3.258e-05	5.83	55	125.7	120	116	119.5	110.9	96.7	99.8	105.3	122.7	167.9
Medium	Collagen alpha-2(V) chain OS=Mus musculus OX=10090 GN=Col5a2 PE=1 SV=1	[R].VGPPGPAGAPGPAGPAGEPGK.[E]	2xOxidation [P4; P6]; 1xTMT6plex [K21]; 1xTMT6plex [N-Term]	Q3U962 2xOxidation [P918; P920]	0.22741	0.0167785	1	1	1	Q3U962	Q3U962 [915-935]	0	2228.21	0					No Quan Values	High	High	High	High	High	High	High	High	High	High	High	n/a	4.28		0.005164		0.08662			8
High	Collagen alpha-2(VI) chain OS=Mus musculus OX=10090 GN=Col6a2 PE=1 SV=3	[R].GPQGALGEPGK.[Q]	1xOxidation [P9]; 1xTMT6plex [K11]; 1xTMT6plex [N-Term]	Q02788 1xOxidation [P498]	4.04963e-06	0	1	2	4	Q02788	Q02788 [490-500]	0	1484.85	0	427.2	424.3	13.87	55.18		High	High	High	High	High	High	High	High	High	High	High	High	-0.7	-0.7	0	2.328e-05	0.0001765	0.0003899	4.09	32	435.2	432.8	370.6	547	421.6	345.9	329.2	435.4	1000.6	424.3
High	Collagen alpha-2(VI) chain OS=Mus musculus OX=10090 GN=Col6a2 PE=1 SV=3	[R].GPDGYPGEAGSPGER.[G]	2xOxidation [P6; P12]; 1xTMT6plex [N-Term]	Q02788 2xOxidation [P372; P378]	3.17679e-09	0	1	2	6	Q02788	Q02788 [367-381]	0	1706.78	0	221.7	175.5	23.67	88.97		High	High	High	High	High	High	High	High	High	High	High	High	-0.59	-0.59	0	0	1.425e-10	1.75e-10	4.39	47	261.8	250.7	163.4	309.8	196.1	153.2	157.7	202.8	738.8	175.5
High	Collagen, type VI, alpha 3 OS=Mus musculus OX=10090 GN=Col6a3 PE=1 SV=2	[R].GYPGDEGGPGER.[G]	1xOxidation [P3]; 1xTMT6plex [N-Term]	E9PWQ3 1xOxidation [P2061]	0.000161676	0	1	3	2	E9PWQ3	E9PWQ3 [2059-2070]	0	1435.67	0	254.9	215.5	16.46	86.74		High	High	High	High	High	High	High	High	High	High	n/a	High		1.89		0		1.205e-05	4.47		286.3	277.7	223.9	329.9	233.8	187.6	176.3	224.5	835.3	215.5
High	Collagen, type VI, alpha 3 OS=Mus musculus OX=10090 GN=Col6a3 PE=1 SV=2	[R].GSQGPPGPIGPPGLIGEQGIPGPR.[G]	2xOxidation [P12; P21]; 1xTMT6plex [N-Term]	E9PWQ3 2xOxidation [P2236; P2245]	3.61831e-05	0	1	3	1	E9PWQ3	E9PWQ3 [2225-2248]	0	2496.34	0	157.6	163.6	7.61	4.41		High	High	High	High	High	High	High	High	High	High	n/a	High		0.36		0		2.032e-06	6.1		159.6	138.6	167.6	153.2	155.7	158.9	158.2	163.6	175.8	168.2
High	Collagen, type VI, alpha 3 OS=Mus musculus OX=10090 GN=Col6a3 PE=1 SV=2	[R].GSQGPPGPIGPPGLIGEQGIPGPR.[G]	3xOxidation [P11; P12; P21]; 1xTMT6plex [N-Term]	E9PWQ3 3xOxidation [P2235; P2236; P2245]	8.24936e-07	0	1	3	1	E9PWQ3	E9PWQ3 [2225-2248]	0	2512.34	0	55.2	60.5	10.58	37.27		High	High	High	High	High	High	High	High	High	High	n/a	High		2.34		0		2.313e-08	5.52		64.7	64.2	52.8	57.4	50.7	60.5	46	53.6	110.8	70.2
High	Complement component 1 Q subcomponent-binding protein, mitochondrial OS=Mus musculus OX=10090 GN=C1qbp PE=1 SV=1	[K].TLVLDCHYPEDEIGHEDEAESDIFSIK.[E]	1xCarbamidomethyl [C6]; 1xOxidation [P9]; 1xTMT6plex [K27]; 1xTMT6plex [N-Term]	Q8R5L1 1xOxidation [P186]	2.58341e-05	0	1	2	4	Q8R5L1	Q8R5L1 [178-204]	0	3635.75	0	95.2	104.3	4.18	9.65		High	High	High	High	High	High	High	High	High	High	High	High	0.79	0.79	0	2.892e-05	3.412e-05	0.000503	4.36	2	91.9	94.6	97.5	88.1	95.7	96.9	109.8	104.3	96.9	121.3
High	Creatine kinase M-type OS=Mus musculus OX=10090 GN=Ckm PE=1 SV=1	[K].AGHPFMWNEHLGYVLTCPSNLGTGLR.[G]	1xCarbamidomethyl [C17]; 3xOxidation [P4; M6; P18]; 1xTMT6plex [N-Term]	P07310 3xOxidation [P270; P284; ]	0.090093	0.00646621	1	2	1	P07310	P07310 [267-292]	0	3204.56	0	59.1	55.3	7.21	7.22		High	High	High	High	High	High	High	High	High	High	n/a	High		-0.47		0.001669		0.02283	3.33		57.6	61.4	55.9	66.2	60.8	55.3	54.3	64	55.2	60.3
Medium	Creatine kinase M-type OS=Mus musculus OX=10090 GN=Ckm PE=1 SV=1	[K].LNYKPQEEYPDLSK.[H]	1xDeamidated [Q6]; 1xOxidation [P10]; 2xTMT6plex [K4; K14]; 1xTMT6plex [N-Term]	P07310 1xOxidation [P21]	0.240503	0.0179547	1	1	1	P07310	P07310 [12-25]	0	2428.32	0	257.7	230.3	9.16	10.51		High	High	High	High	High	High	High	High	High	High	n/a	High		11.15		0.005636		0.08156	2.08		257	249.5	258.4	306.9	266	230.3	271	258.1	209.9	224.5
High	Creatine kinase M-type OS=Mus musculus OX=10090 GN=Ckm PE=1 SV=1	[K].LNYKPQEEYPDLSK.[H]	1xOxidation [P5]; 2xTMT6plex [K4; K14]; 1xTMT6plex [N-Term]	P07310 1xOxidation [P16]	0.00322546	0.000252531	1	1	2	P07310	P07310 [12-25]	0	2427.34	0	143	144.7	6.16	5.36		High	High	High	High	High	High	High	High	High	High	High	High	2.1	2.1	0.0001257	2.328e-05	0.00165	0.0004199	4.28	5	130.3	151.5	140.7	152.6	136	144.7	139.7	147.4	128.4	144.8
High	Creatine kinase M-type OS=Mus musculus OX=10090 GN=Ckm PE=1 SV=1	[K].GGDDLDPNYVLSSR.[V]	1xOxidation [P7]; 1xTMT6plex [N-Term]	P07310 1xOxidation [P123]	6.28714e-06	0	1	2	4	P07310	P07310 [117-130]	0	1752.86	0	451.4	423.9	5.9	4.61		High	High	High	High	High	High	High	High	High	High	High	High	1.67	1.67	0	0	2.099e-06	2.553e-07	4.14	47	458.2	444.6	438.5	472.6	482.4	437.4	418.2	423.9	387	429.1
High	Creatine kinase S-type, mitochondrial OS=Mus musculus OX=10090 GN=Ckmt2 PE=1 SV=1	[R].LIDDHFLFDKPVSPLLTCAGMAR.[D]	1xCarbamidomethyl [C18]; 2xOxidation [P/M]; 1xTMT6plex [K10]; 1xTMT6plex [N-Term]	Q6P8J7 2xOxidation [P]	0.000118737	0	1	1	23	Q6P8J7	Q6P8J7 [221-243]	0	3106.65	0	1160.8	1188.9	5.38	4.8		High	High	High	High	High	High	High	High	High	High	High	High	-2.85	-0.74	0	1.196e-05	7.073e-05	0.0001228	4.76	0	1260.7	1132.6	1176.6	1145.1	1130.8	1125.4	1169.9	1188.9	1282.2	1190.2
Medium	Creatine kinase S-type, mitochondrial OS=Mus musculus OX=10090 GN=Ckmt2 PE=1 SV=1	[R].GLSLPPACSR.[A]	1xCarbamidomethyl [C8]; 1xOxidation [P6]; 1xTMT6plex [N-Term]	Q6P8J7 1xOxidation [P178]	0.359823	0.0294776	1	1	16	Q6P8J7	Q6P8J7 [173-182]	0	1302.7	0	1590.8	1739.7	7.7	9.93		High	High	High	High	High	High	High	High	High	High	High	Medium	-0.49	-0.49	0.009432	0.01885	0.147	0.2396	1.67	6	1584.9	1579.5	1892	1596.8	1657.9	1739.7	1659.5	1528.9	1878.1	1969.4
High	Creatine kinase U-type, mitochondrial OS=Mus musculus OX=10090 GN=Ckmt1 PE=1 SV=1 Creatine kinase S-type, mitochondrial OS=Mus musculus OX=10090 GN=Ckmt2 PE=1 SV=1	[R].LGYILTCPSNLGTGLR.[A]	1xCarbamidomethyl [C7]; 1xOxidation [P8]; 1xTMT6plex [N-Term]	P30275 1xOxidation [P318]; Q6P8J7 1xOxidation [P318]	2.83685e-05	0	2	2	14	P30275; Q6P8J7	P30275 [311-326]; Q6P8J7 [311-326]	0	1980.08	0	358.5	337.2	11.31	4.23	Shared	High	High	High	High	High	High	High	High	High	High	High	High	-0.65	0.58	0	0	5.783e-05	2.378e-05	4.45	12	360.7	356.2	339.2	417.9	407	340.4	337.2	327.1	349.6	312.7
Medium	CREB-regulated transcription coactivator 3 OS=Mus musculus OX=10090 GN=Crtc3 PE=1 SV=2	[K].CHPQPSVANASALHPSLR.[L]	1xCarbamidomethyl [C1]; 2xDeamidated [Q4; N9]; 1xOxidation [P15]; 1xTMT6plex [N-Term]	Q91X84 1xOxidation [P362]	0.364357	0.0298894	1	2	2	Q91X84	Q91X84 [348-365]	0	2189.1	0	7.9	5.7	36.37	33.27		High	Medium	High	High	High	High	High	High	High	High	n/a	High		0.26		0.00945		0.1462	1.68		9	2.6	7	10.5	7.1	8.8	4.3	5.4	9.4	5.7
Medium	CTD nuclear envelope phosphatase 1 OS=Mus musculus OX=10090 GN=Ctdnep1 PE=1 SV=2	[R].SHPDNAIPIK.[S]	1xOxidation [P3]; 1xTMT6plex [K10]; 1xTMT6plex [N-Term]	Q3TP92 1xOxidation [P196]	0.463917	0.043321	1	2	1	Q3TP92	Q3TP92 [194-203]	0	1565.91	0					No Quan Values	Medium	Medium	Medium	Medium	Medium	Medium	Medium	Medium	Medium	Medium	n/a	Medium		3.46		0.01504		0.2057	1.05
Medium	Cullin-9 OS=Mus musculus OX=10090 GN=Cul9 PE=1 SV=1	[R].EFAVNLRNQASAIQEVPPPK.[S]	2xOxidation [P17; P18]; 1xTMT6plex [K20]; 1xTMT6plex [N-Term]	S4R1Y1 2xOxidation [P2328; P2329]	0.346467	0.0280513	1	4	1	S4R1Y1	S4R1Y1 [2312-2331]	1	2698.49	0	184.2	231	10.87	21.59		High	High	High	High	High	High	High	High	High	High	n/a	High		4.81		0.008847		0.1357	3.31		153.9	208.8	185.6	164.3	182.8	282.1	231	208.5	153.1	252.4
High	Cytochrome b-c1 complex subunit 1, mitochondrial OS=Mus musculus OX=10090 GN=Uqcrc1 PE=1 SV=2	[R].VYEEDAVPGLTPCR.[F]	1xCarbamidomethyl [C13]; 1xOxidation [P]; 1xTMT6plex [N-Term]	Q9CZ13 1xOxidation [P]	0.000280708	0	1	1	26	Q9CZ13	Q9CZ13 [256-269]	0	1850.92	0	2864.8	3005.6	3	2.52		High	High	High	High	High	High	High	High	High	High	High	High	-1.63	7.43	0	0.000346	4.735e-05	0.004724	3.64	33	2859.2	2831.2	2933.1	2702.2	2935.1	3005.6	3087	2946.6	2901.4	3051.4
High	Cytochrome b-c1 complex subunit 1, mitochondrial OS=Mus musculus OX=10090 GN=Uqcrc1 PE=1 SV=2	[R].NALVSHLDGTTPVCEDIGR.[S]	1xCarbamidomethyl [C14]; 1xDeamidated [N1]; 1xOxidation [P12]; 1xTMT6plex [N-Term]	Q9CZ13 1xOxidation [P408]	0.0092702	0.0004817	1	2	2	Q9CZ13	Q9CZ13 [397-415]	0	2300.14	0					No Quan Values	High	High	High	High	High	High	High	High	High	High	Low	High	0.46	-0.61	0.08968	0.0001059	0.6006	0.001474	2.62	7
High	Cytochrome b-c1 complex subunit 1, mitochondrial OS=Mus musculus OX=10090 GN=Uqcrc1 PE=1 SV=2	[R].NALVSHLDGTTPVCEDIGR.[S]	1xCarbamidomethyl [C14]; 1xOxidation [P12]; 1xTMT6plex [N-Term]	Q9CZ13 1xOxidation [P408]	2.37536e-06	0	1	2	24	Q9CZ13	Q9CZ13 [397-415]	0	2299.15	0	1085.4	1093.9	3.17	3.52		High	High	High	High	High	High	High	High	High	High	High	High	-1.1	-0.03	0	0	0.0001419	3.373e-07	4.6	9	1071.6	1089.7	1165.8	1078.7	1084.6	1053.5	1093.9	1096.3	1088.3	1160.4
High	Cytochrome b-c1 complex subunit 1, mitochondrial OS=Mus musculus OX=10090 GN=Uqcrc1 PE=1 SV=2	[K].YFYDQCPAVAGYGPIEQLPDYNR.[I]	1xCarbamidomethyl [C6]; 1xDeamidated [Q]; 1xOxidation [P]; 1xTMT6plex [N-Term]	Q9CZ13 1xOxidation [P]	1.54498e-08	0	1	1	8	Q9CZ13	Q9CZ13 [448-470]	0	2982.38	0	184.1	193.7	7.36	7.5		High	High	High	High	High	High	High	High	High	High	High	High	11.95	11.95	0	0	1.368e-05	5.884e-07	6.3	38	202.7	180.1	190.9	166.9	170.3	193.7	199.3	164.4	189.5	197.3
High	Cytochrome b-c1 complex subunit 1, mitochondrial OS=Mus musculus OX=10090 GN=Uqcrc1 PE=1 SV=2	[K].YFYDQCPAVAGYGPIEQLPDYNR.[I]	1xCarbamidomethyl [C6]; 1xOxidation [P]; 1xTMT6plex [N-Term]	Q9CZ13 1xOxidation [P]	3.42313e-08	0	1	1	29	Q9CZ13	Q9CZ13 [448-470]	0	2981.4	0	617	630.9	11.09	4.92		High	High	High	High	High	High	High	High	High	High	High	High	2.18	0.59	0	0	6.557e-09	2.773e-07	6.25	53	603	747.4	631.4	562.2	559.8	627.3	662.7	630.9	686.5	606.5
High	Cytochrome b-c1 complex subunit 10 OS=Mus musculus OX=10090 GN=Uqcr11 PE=3 SV=1	[R].LILDWVPYINGK.[F]	1xDeamidated [N10]; 1xOxidation [P7]; 1xTMT6plex [K12]; 1xTMT6plex [N-Term]	Q9CPX8 1xOxidation [P46]	0.011148	0.000551893	1	1	8	Q9CPX8	Q9CPX8 [40-51]	0	1906.11	0	424.2	402	6.99	10.12		High	High	High	High	High	High	High	High	High	High	High	High	-0.43	-1.8	0.0001857	0.0007165	0.002867	0.01082	3.56	11	416.4	436.6	476.2	393.8	400.9	402	431.4	391	468	358.5
Medium	Cytochrome b-c1 complex subunit 2, mitochondrial (Fragment) OS=Mus musculus OX=10090 GN=Uqcrc2 PE=1 SV=1	[K].TSAAPGGVPLQPQDLETTK.[G]	1xDeamidated [Q11]; 1xOxidation [P12]; 1xTMT6plex [K19]; 1xTMT6plex [N-Term]	A0A140LI98 1xOxidation [P35]	0.298636	0.0228526	1	1	1	A0A140LI98	A0A140LI98 [24-42]	0	2385.29	0	118.1	129	17.62	14.94		High	High	High	High	High	High	High	High	High	High	n/a	High		8.48		0.007199		0.1101	3.41		94.9	155.9	127.1	108.7	109.8	164.1	112	143.5	129	123.6
High	Cytochrome b-c1 complex subunit 2, mitochondrial OS=Mus musculus OX=10090 GN=Uqcrc2 PE=1 SV=1	[K].NALANPLYCPDYR.[M]	1xCarbamidomethyl [C9]; 1xDeamidated [N1]; 1xOxidation [P10]; 1xTMT6plex [N-Term]	Q9DB77 1xOxidation [P193]	0.0284968	0.00131975	1	1	2	Q9DB77	Q9DB77 [184-196]	0	1812.88	0	117.4	115.7	10.67	16.73		High	High	High	High	High	High	High	High	High	High	High	High	-1.06	-1.06	0.0004096	0.0005733	0.008218	0.008243	2.21	0	91.7	119.4	121.4	115.4	120	149.7	98.3	122.9	115.7	105.9
High	Cytochrome b-c1 complex subunit 2, mitochondrial OS=Mus musculus OX=10090 GN=Uqcrc2 PE=1 SV=1	[K].NALANPLYCPDYR.[M]	1xCarbamidomethyl [C9]; 1xOxidation [P]; 1xTMT6plex [N-Term]	Q9DB77 1xOxidation [P]	0.00220417	0.000188861	1	1	21	Q9DB77	Q9DB77 [184-196]	0	1811.89	0	870.7	877.1	3.55	3.9		High	High	High	High	High	High	High	High	High	High	High	High	2.26	0.17	4.271e-05	0.0005733	0.0004725	0.008184	3.61	25	878.6	895.5	941.4	862.6	860.5	897.8	903.1	877.1	824.7	844.9
High	Cytochrome b-c1 complex subunit 2, mitochondrial OS=Mus musculus OX=10090 GN=Uqcrc2 PE=1 SV=1	[K].LPNGLVIASLENYAPLSR.[I]	1xDeamidated [N3]; 1xOxidation [P]; 1xTMT6plex [N-Term]	Q9DB77 1xOxidation [P]	3.6542e-07	0	1	1	8	Q9DB77	Q9DB77 [43-60]	0	2173.21	0	108.2	112.1	10.03	5.26		High	High	High	High	High	High	High	High	High	High	High	High	0.15	1.7	0	0	0.0001183	6.686e-08	5.76	8	123.9	114.5	120	97.6	101.1	122.3	107.5	109.6	116.9	112.1
High	Cytochrome b-c1 complex subunit 2, mitochondrial OS=Mus musculus OX=10090 GN=Uqcrc2 PE=1 SV=1	[K].LPNGLVIASLENYAPLSR.[I]	1xOxidation [P2]; 1xTMT6plex [N-Term]	Q9DB77 1xOxidation [P44]	5.56913e-08	0	1	1	8	Q9DB77	Q9DB77 [43-60]	0	2172.22	0	101.8	105.9	7.85	6.3		High	High	High	High	High	High	High	High	High	High	High	High	-0.11	-0.26	0	0	1.138e-08	3.361e-08	5.86	47	104	106.6	97.4	85.1	104.2	97	108.5	100.2	113.6	105.9
High	Cytochrome b-c1 complex subunit Rieske, mitochondrial OS=Mus musculus OX=10090 GN=Uqcrfs1 PE=1 SV=1	[R].GVAGALRPLLQGAVPAASEPPVLDVK.[R]	1xDeamidated [Q11]; 1xOxidation [P]; 1xTMT6plex [K26]; 1xTMT6plex [N-Term]	Q9CR68 1xOxidation [P]	2.48916e-06	0	1	1	2	Q9CR68	Q9CR68 [21-46]	0	3000.75	0	143.5	143.4	8.84	9.29		High	High	High	High	High	High	High	High	High	High	High	High	13.51	13.51	0	0	7.483e-07	8.495e-08	4.47	18	150.9	140.9	146.1	127.1	139.1	160.7	157	143.4	141.1	126.8
High	Cytochrome c oxidase assembly protein COX20, mitochondrial OS=Mus musculus OX=10090 GN=Cox20 PE=1 SV=1	[K].LLGILDVENTPCAR.[E]	1xCarbamidomethyl [C12]; 1xOxidation [P11]; 1xTMT6plex [N-Term]	Q9D7J4 1xOxidation [P27]	0.00142378	0.000123263	1	1	4	Q9D7J4	Q9D7J4 [17-30]	0	1815.98	0	101.6	108.6	7.72	7.68		High	High	High	High	High	High	High	High	High	High	High	High	-1.1	-1.1	2.781e-05	0.0001156	0.0002895	0.001625	2.78	18	104.2	111.7	102.4	87.7	100.8	108.7	102.3	96.4	108.6	118.3
High	Cytochrome c oxidase subunit 1 OS=Mus musculus OX=10090 GN=Mtco1 PE=1 SV=2	[R].EVMSVSYASTNLEWLHGCPPPYHTFEEPTYVK.[V]	1xCarbamidomethyl [C18]; 2xOxidation [P20; P]; 1xTMT6plex [K32]; 1xTMT6plex [N-Term]	P00397 2xOxidation [P500; P]	1.86374e-10	0	1	1	4	P00397	P00397 [481-512]	0	4259.05	0	77.1	87.7	11.28	6.71		High	High	High	High	High	High	High	High	High	High	High	High	2.23	4.18	0	0	5.162e-07	6.883e-09	7.22	12	72.1	90.5	89.8	81.8	72.6	94.6	87.7	84.1	81.2	94
Medium	Cytochrome c oxidase subunit 2 OS=Mus musculus OX=10090 GN=Mtco2 PE=1 SV=1	[R].VVLPMELPIR.[M]	2xOxidation [P4; M5]; 1xTMT6plex [N-Term]	P00405 2xOxidation [P145; ]	0.392444	0.0331757	1	1	1	P00405	P00405 [142-151]	0	1427.85	0					No Quan Values	Medium	Medium	Medium	Medium	Medium	Medium	Medium	Medium	Medium	Medium	n/a	Medium		-3.47		0.01059		0.1621	1.69
High	Cytochrome c oxidase subunit 4 isoform 1, mitochondrial OS=Mus musculus OX=10090 GN=Cox4i1 PE=1 SV=2	[K].SEDYAFPTYADR.[R]	1xOxidation [P7]; 1xTMT6plex [N-Term]	P19783 1xOxidation [P36]	3.26534e-06	0	1	1	15	P19783	P19783 [30-41]	0	1679.78	0	2332.2	2405.8	1.33	4.89		High	High	High	High	High	High	High	High	High	High	High	High	-1.37	-0.63	0	1.196e-05	3.205e-07	0.0001178	4.37	32	2300.4	2351.6	2313.1	2365.6	2361.3	2405.8	2428.4	2453.2	2217.1	2226.7
High	Cytochrome c oxidase subunit 5A, mitochondrial OS=Mus musculus OX=10090 GN=Cox5a PE=1 SV=2	[R].WVTYFNKPDIDAWELR.[K]	1xOxidation [P8]; 1xTMT6plex [K7]; 1xTMT6plex [N-Term]	P12787 1xOxidation [P59]	0.0173182	0.000799344	1	1	1	P12787	P12787 [52-67]	0	2527.34	0	105	115	13.88	5.49		High	High	High	High	High	High	High	High	High	High	n/a	High		2.39		0.0002361		0.003105	3.22		111	97.2	137	99.3	98.4	114.2	125.1	110.3	123.9	115
High	Cytochrome c oxidase subunit 5B, mitochondrial OS=Mus musculus OX=10090 GN=Cox5b PE=1 SV=1	[K].EDPNLVPSISNK.[R]	1xOxidation [P7]; 1xTMT6plex [K12]; 1xTMT6plex [N-Term]	P19536 1xOxidation [P80]	0.0103556	0.000540209	1	2	2	P19536	P19536 [74-85]	0	1787	0					No Quan Values	High	High	High	High	High	High	High	High	High	High	High	High	0.21	0.21	0.0001974	0.0001256	0.003525	0.001682	3.19	5
Medium	Cytochrome c oxidase subunit 5B, mitochondrial OS=Mus musculus OX=10090 GN=Cox5b PE=1 SV=1	[R].CPNCGTHYK.[L]	2xCarbamidomethyl [C1; C4]; 1xDeamidated [N3]; 1xOxidation [P2]; 1xTMT6plex [K9]; 1xTMT6plex [N-Term]	P19536 1xOxidation [P113]	0.390046	0.0328245	1	2	2	P19536	P19536 [112-120]	0	1611.77	0					No Quan Values	Medium	Medium	Medium	Medium	Medium	Medium	Medium	Medium	Medium	Medium	n/a	Medium		0.76		0.0105		0.1608	1.97
High	Cytochrome c oxidase subunit 5B, mitochondrial OS=Mus musculus OX=10090 GN=Cox5b PE=1 SV=1	[R].CPNCGTHYK.[L]	2xCarbamidomethyl [C1; C4]; 1xOxidation [P2]; 1xTMT6plex [K9]; 1xTMT6plex [N-Term]	P19536 1xOxidation [P113]	0.0137742	0.000629802	1	2	16	P19536	P19536 [112-120]	0	1610.78	0	734.5	830.5	7.6	5.07		High	High	High	High	High	High	High	High	High	High	High	High	0.17	0.17	0.001019	0.0001969	0.01581	0.002365	3.29	15	733.7	735.3	816.5	688.4	679.3	845.9	830.5	766.9	760.6	836.9
High	Cytochrome c oxidase subunit 5B, mitochondrial OS=Mus musculus OX=10090 GN=Cox5b PE=1 SV=1	[K].GLDPYNMLPPK.[A]	2xOxidation [P4; M7]; 1xTMT6plex [K11]; 1xTMT6plex [N-Term]	P19536 2xOxidation [P60; ]	0.0737082	0.00530476	1	2	4	P19536	P19536 [57-67]	0	1734.95	0	259.8	260.1	5.84	5.22		High	High	High	High	High	High	High	High	High	High	High	High	-0.62	0.55	0.002474	0.002519	0.03891	0.03298	3.49	24	248.6	263.2	271.6	236.6	256.4	243.9	280.7	268.2	256.6	260.1
High	Cytochrome c oxidase subunit 6A1, mitochondrial OS=Mus musculus OX=10090 GN=Cox6a1 PE=1 SV=2	[R].TKPFPWGDGNHTLFHNPHVNPLPTGYEDE.[-]	2xOxidation [P3; P5]; 1xTMT6plex [K2]; 1xTMT6plex [N-Term]	P43024 2xOxidation [P85; P87]	0.13814	0.00987139	1	2	1	P43024	P43024 [83-111]	0	3806.86	0	244.1	245.7	3.65	3.97		High	High	High	High	High	High	High	High	High	High	n/a	High		2.25		0.002996		0.03927	2.98		243.4	228.4	248	244.9	238	246.7	262.2	241.2	236.1	245.7
High	Cytochrome c oxidase subunit 6A2, mitochondrial OS=Mus musculus OX=10090 GN=Cox6a2 PE=1 SV=2	[R].TKPFAWGDGNHTLFHNPHVNPLPTGYEHP.[-]	2xOxidation [P3; P17]; 1xTMT6plex [K2]; 1xTMT6plex [N-Term]	P43023 2xOxidation [P71; P85]	0.0300692	0.00150729	1	1	1	P43023	P43023 [69-97]	0	3770.89	0	78.3	79	9.67	7.28		High	High	High	High	High	High	High	High	High	High	n/a	High		1.5		0.0004328		0.005991	7.93		84.1	80.9	75.7	63.3	75.4	78.7	79	69.3	84.8	81.2
High	Cytochrome c oxidase subunit 6B1 OS=Mus musculus OX=10090 GN=Cox6b1 PE=1 SV=2	[K].SLCPVSWVSAWDDR.[I]	1xCarbamidomethyl [C3]; 1xOxidation [P4]; 1xTMT6plex [N-Term]	P56391 1xOxidation [P66]	0.000576371	0	1	2	97	P56391	P56391 [63-76]	0	1922.93	0	4417.9	4526.3	3.35	1.25		High	High	High	High	High	High	High	High	High	High	High	High	-3.2	-0.8	0	1.196e-05	0.0001934	9.855e-05	4.71	48	4361.4	4442.3	4662.5	4272.7	4393.6	4577.2	4611.8	4510.2	4467.7	4526.3
High	Cytochrome c oxidase subunit 7A1, mitochondrial OS=Mus musculus OX=10090 GN=Cox7a1 PE=1 SV=1	[K].LFQADNDLPVHLK.[G]	1xOxidation [P9]; 1xTMT6plex [K13]; 1xTMT6plex [N-Term]	P56392 1xOxidation [P40]	0.000378573	0	1	2	6	P56392	P56392 [32-44]	0	1984.13	0	97.8	94.9	8.44	10.63		High	High	High	High	High	High	High	High	High	High	High	High	-0.89	-0.89	0	1.196e-05	6.569e-05	0.0001669	4.01	11	92.6	111.1	107.6	90.4	95.1	94.9	86	91.6	110.4	107.2
High	Cytochrome c oxidase subunit 7C, mitochondrial OS=Mus musculus OX=10090 GN=Cox7c PE=1 SV=1	[R].SHYEEGPGK.[N]	1xOxidation [P7]; 1xTMT6plex [K9]; 1xTMT6plex [N-Term]	P17665 1xOxidation [P23]	0.0730885	0.00527457	1	1	3	P17665	P17665 [17-25]	0	1477.77	0	344.3	326.5	10.35	7.05		High	High	High	High	High	High	High	High	High	High	n/a	High		-1.11		0.001778		0.02415	2.72		401.3	291.2	341.1	355.3	347.4	293.6	358.1	323.6	326.5	332.1
Medium	Cytochrome c oxidase subunit NDUFA4 OS=Mus musculus OX=10090 GN=Ndufa4 PE=1 SV=2	[K].NNPEPWNK.[L]	1xOxidation [P5]; 1xTMT6plex [K8]; 1xTMT6plex [N-Term]	Q62425 1xOxidation [P53]	0.342097	0.027602	1	2	7	Q62425	Q62425 [49-56]	0	1472.79	0	971.3	1009.1	6.13	9.37		High	High	High	High	High	High	High	High	High	High	High	High	0.03	-0.66	0.008955	0.00869	0.1409	0.1334	1.32	11	961.9	916.7	1083.2	1036.1	980.8	914	1051.7	1024.1	1009.1	833.7
High	Cytochrome c oxidase subunit NDUFA4 OS=Mus musculus OX=10090 GN=Ndufa4 PE=1 SV=2	[R].LALFNPDVSWDR.[K]	1xOxidation [P6]; 1xTMT6plex [N-Term]	Q62425 1xOxidation [P41]	0.0227503	0.00107996	1	2	62	Q62425	Q62425 [36-47]	0	1677.88	0	3340.5	3464.3	4.13	0.57		High	High	High	High	High	High	High	High	High	High	High	High	2.41	3.38	0.0003176	0.00941	0.006534	0.1455	3.54	30	3219.1	3371.3	3580.3	3300.2	3522	3507.2	3462	3467.7	3460.6	3464.3
High	Cytochrome c oxidase subunit NDUFA4 OS=Mus musculus OX=10090 GN=Ndufa4 PE=1 SV=2	[R].KNNPEPWNK.[L]	1xOxidation [P6]; 2xTMT6plex [K1; K9]; 1xTMT6plex [N-Term]	Q62425 1xOxidation [P53]	0.0204043	0.000931629	1	2	6	Q62425	Q62425 [48-56]	1	1830.05	0	657	610.5	6.79	5.65		High	High	High	High	High	High	High	High	High	High	High	High	-3.37	-3.37	0.002012	0.0002702	0.03016	0.003792	3.74	19	650.3	581.4	663.8	685.9	702.5	582.5	638.2	662.6	584.1	610.5
Medium	Cytochrome c oxidase subunit NDUFA4 OS=Mus musculus OX=10090 GN=Ndufa4 PE=1 SV=2	[R].KNNPEPWNK.[L]	2xOxidation [P4; P6]; 2xTMT6plex [K1; K9]; 1xTMT6plex [N-Term]	Q62425 2xOxidation [P51; P53]	0.463917	0.043321	1	2	1	Q62425	Q62425 [48-56]	1	1846.04	0	337.9	338.5	1.3	4.89		Medium	Medium	Medium	Medium	Medium	Medium	Medium	Medium	Medium	Medium	n/a	Medium		-0.15		0.01502		0.2054	2.71		339	330.7	339.4	336.9	334.8	323.3	363.1	338.5	328	352.4
High	Cytochrome c1, heme protein, mitochondrial OS=Mus musculus OX=10090 GN=Cyc1 PE=1 SV=1	[R].HGGEDYVFSLLTGYCEPPTGVSLR.[E]	1xCarbamidomethyl [C15]; 1xOxidation [P]; 1xTMT6plex [N-Term]	Q9D0M3 1xOxidation [P]	7.10056e-06	0	1	2	9	Q9D0M3	Q9D0M3 [205-228]	0	2899.41	0	169.2	164.7	4.9	6.7		High	High	High	High	High	High	High	High	High	High	High	High	-1.34	-1.34	0	0	4.342e-05	2.011e-05	4.63	20	168	162.8	185.1	177.6	165.1	164.7	170.1	171.6	163.2	144.3
High	Cytochrome c1, heme protein, mitochondrial OS=Mus musculus OX=10090 GN=Cyc1 PE=1 SV=1	[R].EGLYFNPYFPGQAIGMAPPIYTEVLEYDDGTPATMSQVAK.[D]	1xOxidation [P/M]; 1xTMT6plex [K40]; 1xTMT6plex [N-Term]	Q9D0M3 1xOxidation [P]	3.76043e-10	0	1	2	6	Q9D0M3	Q9D0M3 [229-268]	0	4855.39	0	110.6	77	26.58	16.21		High	High	High	High	High	High	High	High	High	High	High	High	3.04	3.06	0	0	1.327e-09	1.18e-08	7.58	48	104.8	116.8	77.9	138.1	140.4	77	94	88.1	76.9	60.4
Medium	Cytochrome c1, heme protein, mitochondrial OS=Mus musculus OX=10090 GN=Cyc1 PE=1 SV=1	[R].WASEPEHDHR.[K]	1xOxidation [P5]; 1xTMT6plex [N-Term]	Q9D0M3 1xOxidation [P280]	0.232255	0.0172736	1	2	2	Q9D0M3	Q9D0M3 [276-285]	0	1508.71	0					No Quan Values	High	High	High	High	High	High	High	High	High	High	Low	High	-0.78	-0.78	0.2062	0.005364	1	0.07742	1.58	1
High	Cytoglobin OS=Mus musculus OX=10090 GN=Cygb PE=1 SV=1	[K].EVGWVQQVPNTTTPPATLPSSGP.[-]	5xOxidation [P9; P14; P15; P19; P23]; 1xTMT6plex [N-Term]	Q9CX80 5xOxidation [P176; P181; P182; P186; P190]	0.00285881	0.000252531	1	1	1	Q9CX80	Q9CX80 [168-190]	0	2672.33	0	7.3	9.6	25.07	28.26		High	High	High	High	High	High	High	High	High	High	High	n/a	-2.99		5.759e-05		0.0006281			28	7.9	8.5	6.8	5.6	4.7	9.9	11.9	6.6	9.6	5.9
High	Cytohesin-3 OS=Mus musculus OX=10090 GN=Cyth3 PE=1 SV=1	[R].GINEGGDLPEELLRNLYESIK.[N]	2xDeamidated [N3; N15]; 1xOxidation [P9]; 1xTMT6plex [K21]; 1xTMT6plex [N-Term]	O08967 1xOxidation [P232]	0.0356103	0.00211634	1	2	2	O08967	O08967 [224-244]	1	2835.5	0	85.8	92.5	10.11	11.59		High	High	High	High	High	High	High	High	High	High	n/a	High		2.51		0.0004956		0.007378	3.06		97.5	77.1	85.5	86	81.2	92.5	96.9	80.6	88.6	109.9
Medium	D-beta-hydroxybutyrate dehydrogenase, mitochondrial OS=Mus musculus OX=10090 GN=Bdh1 PE=1 SV=2	[R].LSRPLSQLPGK.[A]	1xDeamidated [Q7]; 1xOxidation [P4]; 1xTMT6plex [K11]; 1xTMT6plex [N-Term]	Q80XN0 1xOxidation [P9]	0.502685	0.0484172	1	3	2	Q80XN0	Q80XN0 [6-16]	0	1671.02	0					No Quan Values	Medium	Medium	Medium	Medium	Medium	Medium	Medium	Medium	Medium	Medium	Medium	Medium	1.26	1.26	0.01572	0.02908	0.2144	0.3329	3.13	24
Medium	DENN domain-containing protein 5B OS=Mus musculus OX=10090 GN=Dennd5b PE=1 SV=2	[K].NGNVPNNSVSVYELLK.[G]	1xOxidation [P5]; 1xTMT6plex [K16]; 1xTMT6plex [N-Term]	A2RSQ0 1xOxidation [P438]	0.505526	0.0487559	1	1	3	A2RSQ0	A2RSQ0 [434-449]	0	2221.22	0	925.4	949.8	10.06	8.19		Medium	Medium	Medium	Medium	Medium	Medium	Medium	Medium	Medium	Medium	n/a	Medium		0.69		0.01938		0.2443	2.64		816.5	818.6	926.1	1051.3	987.8	855.3	949.8	980.6	808.4	958.8
Medium	Desmoglein-4 OS=Mus musculus OX=10090 GN=Dsg4 PE=1 SV=1	[K].ILDVNDNFPILEK.[T]	1xOxidation [P9]; 1xTMT6plex [K13]; 1xTMT6plex [N-Term]	Q7TMD7 1xOxidation [P267]	0.350877	0.0286273	1	1	17	Q7TMD7	Q7TMD7 [259-271]	0	2004.14	0	6119.4	5460.3	10.52	11.13		High	High	High	High	High	High	High	High	High	High	Low	High	0.61	4.82	0.1495	0.009044	0.8209	0.1385	1.49	10	6115.1	5232.7	6711.2	5809.9	6123.7	4709.1	4960.1	5460.3	6265.7	5521.5
High	Dihydrolipoyl dehydrogenase, mitochondrial OS=Mus musculus OX=10090 GN=Dld PE=1 SV=2	[K].IPNIYAIGDVVAGPMLAHK.[A]	1xDeamidated [N3]; 1xOxidation [P/M]; 1xTMT6plex [K19]; 1xTMT6plex [N-Term]	O08749 1xOxidation [P]	0.0249014	0.00117534	1	1	2	O08749	O08749 [347-365]	0	2454.38	0					No Quan Values	High	High	High	High	High	High	High	High	High	High	High	High	5.8	5.8	0.005631	0.0003497	0.09461	0.004818	4.09	30
High	Dihydrolipoyl dehydrogenase, mitochondrial OS=Mus musculus OX=10090 GN=Dld PE=1 SV=2	[R].RPFTQNLGLEELGIELDPK.[G]	1xDeamidated [N6]; 1xOxidation [P18]; 1xTMT6plex [K19]; 1xTMT6plex [N-Term]	O08749 1xOxidation [P333]	0.036569	0.00216608	1	1	1	O08749	O08749 [316-334]	0	2644.46	0	55.4	59.8	6.07	12.52		High	High	High	High	High	High	High	High	High	High	n/a	High		14.74		0.0005175		0.007578	3.78		62.4	53.3	53.8	54.1	56.6	51.1	60.2	59.8	70.7	54.6
High	Dihydrolipoyl dehydrogenase, mitochondrial OS=Mus musculus OX=10090 GN=Dld PE=1 SV=2	[R].RPFTQNLGLEELGIELDPK.[G]	1xOxidation [P18]; 1xTMT6plex [K19]; 1xTMT6plex [N-Term]	O08749 1xOxidation [P333]	2.86352e-05	0	1	1	2	O08749	O08749 [316-334]	0	2643.48	0	60.1	60	8.63	13.93		High	High	High	High	High	High	High	High	High	High	High	High	2.97	2.97	0	0	3.655e-06	2.061e-06	4.68	22	65	56.4	68.7	56.5	56.9	60	52.6	66.7	71.9	53
High	Dihydrolipoyl dehydrogenase, mitochondrial OS=Mus musculus OX=10090 GN=Dld PE=1 SV=2	[K].NETLGGTCLNVGCIPSK.[A]	2xCarbamidomethyl [C8; C13]; 1xDeamidated [N10]; 1xOxidation [P15]; 1xTMT6plex [K17]; 1xTMT6plex [N-Term]	O08749 1xOxidation [P87]	0.000174238	0	1	1	2	O08749	O08749 [73-89]	0	2295.17	0	115.4	107.5	4.71	9		High	High	High	High	High	High	High	High	High	High	High	High	13.29	13.29	0	1.196e-05	2.771e-05	0.0001146	4.33	33	113.7	126	115.8	117.9	114.9	107.5	101.5	118.9	125	104.5
High	Dihydrolipoyl dehydrogenase, mitochondrial OS=Mus musculus OX=10090 GN=Dld PE=1 SV=2	[K].NETLGGTCLNVGCIPSK.[A]	2xCarbamidomethyl [C8; C13]; 1xOxidation [P15]; 1xTMT6plex [K17]; 1xTMT6plex [N-Term]	O08749 1xOxidation [P87]	1.14442e-05	0	1	1	17	O08749	O08749 [73-89]	0	2294.19	0	1380	1399.4	3.95	6.66		High	High	High	High	High	High	High	High	High	High	High	High	-4.75	1.38	0	0	1.749e-06	9.236e-06	4.9	39	1414.1	1411.7	1324.1	1469.6	1349	1270.9	1344.2	1399.4	1518.4	1429.1
High	Dihydrolipoyllysine-residue acetyltransferase component of pyruvate dehydrogenase complex, mitochondrial OS=Mus musculus OX=10090 GN=Dlat PE=1 SV=2	[R].DVPVGSIICITVEKPQDIEAFK.[N]	1xCarbamidomethyl [C9]; 1xOxidation [P15]; 2xTMT6plex [K14; K22]; 1xTMT6plex [N-Term]	Q8BMF4 1xOxidation [P169]	5.02051e-05	0	1	1	5	Q8BMF4	Q8BMF4 [155-176]	0	3161.77	0	348.8	353.3	5.08	3.81		High	High	High	High	High	High	High	High	High	High	High	High	-1.64	-1.64	0	0	6.85e-06	3.58e-05	4.94	4	334	348.2	356	349.5	345	353.3	334	360.8	369.6	347.7
High	Dihydrolipoyllysine-residue acetyltransferase component of pyruvate dehydrogenase complex, mitochondrial OS=Mus musculus OX=10090 GN=Dlat PE=1 SV=2	[R].DVPLGAPLCIIVEK.[Q]	1xCarbamidomethyl [C9]; 1xOxidation [P7]; 1xTMT6plex [K14]; 1xTMT6plex [N-Term]	Q8BMF4 1xOxidation [P288]	0.00139752	0.000123263	1	1	8	Q8BMF4	Q8BMF4 [282-295]	0	1998.17	0	347.8	348	7.41	3.76		High	High	High	High	High	High	High	High	High	High	High	High	-1.44	-1.48	2.781e-05	0.0004719	0.0002831	0.006573	3.12	9	350.9	390.9	344.6	383.2	336.5	357	372	337.2	345.6	348
High	Dihydrolipoyllysine-residue succinyltransferase component of 2-oxoglutarate dehydrogenase complex, mitochondrial OS=Mus musculus OX=10090 GN=Dlst PE=1 SV=1	[K].ASAFALQEQPVVNAVIDDATK.[E]	1xDeamidated [Q/N]; 1xOxidation [P10]; 1xTMT6plex [K21]; 1xTMT6plex [N-Term]	Q9D2G2 1xOxidation [P297]	1.84531e-07	0	1	2	2	Q9D2G2	Q9D2G2 [288-308]	0	2662.43	0					No Quan Values	High	High	High	High	High	High	High	High	High	High	High	High	14.12	14.12	0	0	1.29e-08	3.299e-06	5.07	40
Medium	Disintegrin and metalloproteinase domain-containing protein 15 OS=Mus musculus OX=10090 GN=Adam15 PE=1 SV=2	[R].SPGGSYMPCAPR.[D]	1xCarbamidomethyl [C9]; 1xOxidation [P2]; 1xTMT6plex [N-Term]	O88839 1xOxidation [P565]	0.502685	0.0484172	1	3	1	O88839	O88839 [564-575]	0	1524.71	0					No Quan Values	Medium	Medium	Medium	Medium	Medium	Medium	Medium	Medium	Medium	Medium	n/a	Medium		-0.76		0.01776		0.2305	1.81
High	DNA damage-binding protein 1 OS=Mus musculus OX=10090 GN=Ddb1 PE=1 SV=2	[R].SVLLLAYKPMEGNFEEIAR.[D]	1xOxidation [P/M]; 1xTMT6plex [K8]; 1xTMT6plex [N-Term]	Q3U1J4 1xOxidation [P]	8.24373e-05	0	1	1	2	Q3U1J4	Q3U1J4 [929-947]	0	2654.46	0	161	164.5	4.93	2.71		High	High	High	High	High	High	High	High	High	High	High	High	2.1	2.1	0	3.999e-05	1.194e-05	0.000537	3.71	44	164	160.3	169	145.5	161.7	162.6	160.8	168.7	164.5	171.8
High	DNA segment, Chr 16, human D22S680E, expressed, isoform CRA_c OS=Mus musculus OX=10090 GN=Tango2 PE=1 SV=1	[R].GEPEPIVLTPGTYGLSNALLETPWK.[K]	2xOxidation [P10; P23]; 1xTMT6plex [K25]; 1xTMT6plex [N-Term]	Q8BTN3 2xOxidation [P150; P163]	0.000325993	0	1	6	2	Q8BTN3	Q8BTN3 [141-165]	0	3172.72	0	61.9	60.1	11.22	14.37		High	High	High	High	High	High	High	High	High	High	High	High	2.6	2.6	0	1.196e-05	5.545e-05	9.641e-05	3.97	16	59.9	63.8	64.8	53.4	59.8	55.9	67.7	60.1	75.1	53.3
Medium	DPH3 homolog OS=Mus musculus OX=10090 GN=Dph3 PE=1 SV=1	[K].EDLENGEDVATCPSCSLIIK.[V]	2xCarbamidomethyl [C12; C15]; 1xDeamidated [N5]; 1xOxidation [P13]; 1xTMT6plex [K20]; 1xTMT6plex [N-Term]	Q8K0W9 1xOxidation [P49]	0.229016	0.016949	1	1	1	Q8K0W9	Q8K0W9 [37-56]	0	2725.33	0	55.8	56.4	15.85	5.2		High	High	High	High	High	High	High	High	High	High	n/a	High		5.63		0.005289		0.07626	2.2		43.4	59.5	58.9	47.8	67.4	57.7	56.4	59.4	51.5	56.2
Medium	Dynein, axonemal, heavy chain 11 OS=Mus musculus OX=10090 GN=Dnah11 PE=1 SV=2	[R].AIAELQNPALR.[D]	2xDeamidated [Q6; N7]; 1xOxidation [P8]; 1xTMT6plex [N-Term]	E9Q7N9 1xOxidation [P1384]	0.453202	0.0415934	1	1	2	E9Q7N9	E9Q7N9 [1377-1387]	0	1442.81	0	158.7	175.4	2.19	6.28		Medium	Medium	Medium	Medium	Medium	Medium	Medium	Medium	Medium	Medium	n/a	Medium		2.46		0.02389		0.2838	1.49		154.2	161	158.7	164.3	156.8	180.9	177.7	153.7	169.6	175.4
Medium	Dystonin (Fragment) OS=Mus musculus OX=10090 GN=Dst PE=1 SV=1	[K].GNLEAPFSAQK.[I]	2xDeamidated [N2; Q10]; 1xOxidation [P6]; 1xTMT6plex [K11]; 1xTMT6plex [N-Term]	A0A1D5RLZ3 1xOxidation [P384]	0.392444	0.0331757	1	1	2	A0A1D5RLZ3	A0A1D5RLZ3 [379-389]	0	1637.88	0	394.8	389.5	4.51	2.89		Medium	Medium	Medium	Medium	Medium	Medium	Medium	Medium	Medium	Medium	n/a	Medium		-0.75		0.01058		0.1618	2.28		389.9	367.7	422.9	397.4	392.2	384.4	394.5	379.8	389.5	409.2
Medium	Dystrophia myotonica WD repeat-containing protein OS=Mus musculus OX=10090 GN=Dmwd PE=1 SV=3	[R].TLPGTPGATPPASGSSR.[A]	2xOxidation [P6; P10]; 1xTMT6plex [N-Term]	Q08274 2xOxidation [P458; P462]	0.422058	0.0371078	1	2	1	Q08274	Q08274 [453-469]	0	1814.94	0					No Quan Values	Medium	Medium	Medium	Medium	Medium	Medium	Medium	Medium	Medium	Medium	n/a	Medium		2.95		0.01213		0.1801	4.36
Medium	Echinoderm microtubule-associated protein-like 6 OS=Mus musculus OX=10090 GN=Eml6 PE=2 SV=1	[R].IFDISWDPYQPNR.[M]	2xDeamidated [Q10; N12]; 2xOxidation [P8; P11]; 1xTMT6plex [N-Term]	Q5SQM0 2xOxidation [P160; P163]	0.264777	0.0198264	1	1	3	Q5SQM0	Q5SQM0 [153-165]	0	1913.91	0	130.1	135.6	5.87	10.04		High	High	High	High	High	High	High	High	High	High	High	Medium	-2.72	-2.72	0.006157	0.04702	0.1038	0.5301	1.86	3	124.8	138.3	135.5	121.8	122.4	148.3	119	146.1	135.6	121.8
High	EH domain-binding protein 1-like protein 1 OS=Mus musculus OX=10090 GN=Ehbp1l1 PE=1 SV=1	[R].VLEAEAASSEVPETDAEEAETLQAK.[E]	1xOxidation [P12]; 1xTMT6plex [K25]; 1xTMT6plex [N-Term]	Q99MS7 1xOxidation [P870]	2.04501e-06	0	1	1	1	Q99MS7	Q99MS7 [859-883]	0	3091.56	0					No Quan Values	High	High	High	High	High	High	High	High	High	High	High	n/a	2.92		0		1.91e-07			34
High	EH domain-binding protein 1-like protein 1 OS=Mus musculus OX=10090 GN=Ehbp1l1 PE=1 SV=1	[R].GQGSEPAAITGGQVGPETPEPPPSPPETR.[S]	5xOxidation [P21; P22; P23; P]; 1xTMT6plex [N-Term]	Q99MS7 5xOxidation [P281; P282; P283; P]	2.91903e-07	0	1	1	2	Q99MS7	Q99MS7 [261-289]	0	3149.51	0	106.3	96.3	52.55	72.29		High	High	High	High	High	High	High	High	High	High	High	n/a	-4.22		0		3.529e-07			27	44.4	188	135.8	50.3	130.7	279.9	50.2	105.9	87.8	96.3
High	Electron transfer flavoprotein subunit alpha, mitochondrial OS=Mus musculus OX=10090 GN=Etfa PE=1 SV=2	[R].AAVDAGFVPNDMQVGQTGK.[I]	1xDeamidated [Q/N]; 1xOxidation [P/M]; 1xTMT6plex [K19]; 1xTMT6plex [N-Term]	Q99LC5 1xOxidation [P]	1.44729e-09	0	1	1	88	Q99LC5	Q99LC5 [250-268]	0	2380.22	0	6174.1	5942	2.74	4.88		High	High	High	High	High	High	High	High	High	High	High	High	-0.31	0.38	0	0	4.081e-08	2.273e-06	5.73	65	6410.2	6176.3	6092.2	6014.8	6434.3	5568.5	5942	6094.2	6372.8	5929.6
High	Electron transfer flavoprotein subunit alpha, mitochondrial OS=Mus musculus OX=10090 GN=Etfa PE=1 SV=2	[K].GLLPEELTPLILETQK.[Q]	1xOxidation [P]; 1xTMT6plex [K16]; 1xTMT6plex [N-Term]	Q99LC5 1xOxidation [P]	0.00193527	0.000188861	1	1	7	Q99LC5	Q99LC5 [86-101]	0	2268.35	0	87.8	90.7	9.45	5.53		High	High	High	High	High	High	High	High	High	High	High	High	-2.11	-2.11	4.271e-05	2.328e-05	0.0004884	0.000426	5.32	23	90.3	86.2	89.4	72	83.4	90.7	82.6	83.2	91	93.1
High	Electron transfer flavoprotein subunit alpha, mitochondrial OS=Mus musculus OX=10090 GN=Etfa PE=1 SV=2	[K].DPEAPIFQVADYGIVADLFK.[V]	1xOxidation [P5]; 1xTMT6plex [K20]; 1xTMT6plex [N-Term]	Q99LC5 1xOxidation [P306]	0.00160684	0.000170585	1	1	8	Q99LC5	Q99LC5 [302-321]	0	2682.44	0	94.5	96.4	5.52	9.88		High	High	High	High	High	High	High	High	High	High	High	High	2.78	2.78	3.847e-05	4.502e-05	0.0003304	0.0006532	3.31	17	94.2	91.3	105.8	97.5	92.2	97.1	96.4	94.2	108.9	82.3
High	Electron transfer flavoprotein subunit beta OS=Mus musculus OX=10090 GN=Etfb PE=1 SV=3	[K].EIIAVSCGPSQCQETIR.[T]	2xCarbamidomethyl [C7; C12]; 1xOxidation [P9]; 1xTMT6plex [N-Term]	Q9DCW4 1xOxidation [P68]	2.56004e-06	0	1	5	41	Q9DCW4	Q9DCW4 [60-76]	0	2193.08	0	1724.3	1706.9	4.19	3.48		High	High	High	High	High	High	High	High	High	High	High	High	-0.43	0.3	0	0	1.923e-05	3.74e-05	4.43	13	1731.9	1648.3	1782.8	1618.7	1716.8	1624.1	1663.7	1736.1	1774.5	1706.9
High	Electron transfer flavoprotein-ubiquinone oxidoreductase, mitochondrial OS=Mus musculus OX=10090 GN=Etfdh PE=1 SV=1	[K].LTFPGGLLIGCSPGFMNVPK.[I]	1xCarbamidomethyl [C11]; 2xOxidation [P/M]; 1xTMT6plex [K20]; 1xTMT6plex [N-Term]	Q921G7 2xOxidation [P]	1.57318e-05	0	1	2	10	Q921G7	Q921G7 [376-395]	0	2595.41	0	278.3	269.2	8.2	5.57		High	High	High	High	High	High	High	High	High	High	High	High	1.71	2.23	0	0.0002487	1.877e-06	0.003426	3.53	24	271.7	289.5	285	267.1	324.2	274.8	242.9	269.2	282.3	266.1
High	Electron transfer flavoprotein-ubiquinone oxidoreductase, mitochondrial OS=Mus musculus OX=10090 GN=Etfdh PE=1 SV=1	[K].TCDIKDPSQNINWVVPEGGGGPAYNGM.[-]	1xCarbamidomethyl [C2]; 1xDeamidated [N25]; 2xOxidation [P22; P/M]; 1xTMT6plex [K5]; 1xTMT6plex [N-Term]	Q921G7 2xOxidation [P611; P]	0.000296902	0	1	2	2	Q921G7	Q921G7 [590-616]	1	3367.6	0	46.5	45	5.53	14.78		High	High	High	High	High	High	High	High	High	High	High	High	-1.4	-1.4	0	0.0002442	5.019e-05	0.00326	4.12	18	42.5	44.1	46.8	46.2	49.9	32.5	43.5	47.7	48.4	45
High	Electron transfer flavoprotein-ubiquinone oxidoreductase, mitochondrial OS=Mus musculus OX=10090 GN=Etfdh PE=1 SV=1	[K].TCDIKDPSQNINWVVPEGGGGPAYNGM.[-]	1xCarbamidomethyl [C2]; 1xDeamidated [N25]; 3xOxidation [P16; M27; P]; 1xTMT6plex [K5]; 1xTMT6plex [N-Term]	Q921G7 3xOxidation [P605; P]	0.000175875	0	1	2	3	Q921G7	Q921G7 [590-616]	1	3383.59	0	100.8	98.3	8.88	10.52		High	High	High	High	High	High	High	High	High	High	High	High	1.18	1.18	0	0.0006538	2.792e-05	0.00972	3.87	19	106.8	96	102.7	87.9	98.9	85.6	102.2	98.3	108.2	85.7
High	Electron transfer flavoprotein-ubiquinone oxidoreductase, mitochondrial OS=Mus musculus OX=10090 GN=Etfdh PE=1 SV=1	[R].FCPAGVYEFVPLEQGDGFR.[L]	1xCarbamidomethyl [C2]; 1xDeamidated [Q14]; 1xOxidation [P11]; 1xTMT6plex [N-Term]	Q921G7 1xOxidation [P569]	5.41388e-07	0	1	2	2	Q921G7	Q921G7 [559-577]	0	2434.16	0	18.2	16.6	26.27	14.01		High	High	High	High	High	High	High	High	High	High	High	High	10.29	10.29	0	0	4.306e-08	2.986e-07	4.54	43	28.5	16.7	19	17.4	13.9	15.1	21	16.6	15.4	18.1
High	Electron transfer flavoprotein-ubiquinone oxidoreductase, mitochondrial OS=Mus musculus OX=10090 GN=Etfdh PE=1 SV=1	[K].TCDIKDPSQNINWVVPEGGGGPAYNGM.[-]	1xCarbamidomethyl [C2]; 1xOxidation [P/M]; 1xTMT6plex [K5]; 1xTMT6plex [N-Term]	Q921G7 1xOxidation [P]	7.29959e-05	0	1	2	18	Q921G7	Q921G7 [590-616]	1	3350.62	0	847.7	846.4	7.24	5.48		High	High	High	High	High	High	High	High	High	High	High	High	2.54	2.54	0	0	1.038e-05	2.872e-05	6.63	27	832.2	824.1	889.7	800.2	863.4	809.3	846.4	861	922.6	810
High	Electron transfer flavoprotein-ubiquinone oxidoreductase, mitochondrial OS=Mus musculus OX=10090 GN=Etfdh PE=1 SV=1	[R].FCPAGVYEFVPLEQGDGFR.[L]	1xCarbamidomethyl [C2]; 1xOxidation [P3]; 1xTMT6plex [N-Term]	Q921G7 1xOxidation [P561]	1.79422e-07	0	1	2	18	Q921G7	Q921G7 [559-577]	0	2433.17	0	196.4	195.1	4.02	2.52		High	High	High	High	High	High	High	High	High	High	High	High	-1.91	-1.91	0	0	5.229e-07	8.437e-06	5.87	47	193.1	186.2	208.9	192.6	199.7	195.1	188.3	193.9	201	198.8
High	Electron transfer flavoprotein-ubiquinone oxidoreductase, mitochondrial OS=Mus musculus OX=10090 GN=Etfdh PE=1 SV=1	[K].TCDIKDPSQNINWVVPEGGGGPAYNGM.[-]	1xCarbamidomethyl [C2]; 2xDeamidated [N/Q]; 2xOxidation [P/M]; 1xTMT6plex [K5]; 1xTMT6plex [N-Term]	Q921G7 2xOxidation [P]	0.00450411	0.000336341	1	2	3	Q921G7	Q921G7 [590-616]	1	3368.58	0	83.4	84.5	6.8	5.66		High	High	High	High	High	High	High	High	High	High	High	High	12.49	12.49	0.0001059	0.006274	0.001037	0.09315	3.14	10	77.8	88	83.7	83.1	72.8	84.5	76.2	82.1	89.1	84.9
High	Electron transfer flavoprotein-ubiquinone oxidoreductase, mitochondrial OS=Mus musculus OX=10090 GN=Etfdh PE=1 SV=1	[K].TCDIKDPSQNINWVVPEGGGGPAYNGM.[-]	1xCarbamidomethyl [C2]; 2xDeamidated [N12; N25]; 1xOxidation [P]; 1xTMT6plex [K5]; 1xTMT6plex [N-Term]	Q921G7 1xOxidation [P]	0.000226393	0	1	2	7	Q921G7	Q921G7 [590-616]	1	3352.59	0	405.1	391.3	6.17	7.09		High	High	High	High	High	High	High	High	High	High	High	High	9.09	9.09	0	0	7.022e-05	2.344e-05	6.62	24	370.6	400.2	410.1	394.7	420.2	359.8	391.3	388.2	432.3	418.2
High	Electron transfer flavoprotein-ubiquinone oxidoreductase, mitochondrial OS=Mus musculus OX=10090 GN=Etfdh PE=1 SV=1	[K].DPSQNINWVVPEGGGGPAYNGM.[-]	1xDeamidated [N20]; 2xOxidation [P17; M22]; 1xTMT6plex [N-Term]	Q921G7 2xOxidation [P611; ]	0.000218081	0	1	2	1	Q921G7	Q921G7 [595-616]	0	2521.15	0	43.6	36.1	6.4	11.88		High	High	High	High	High	High	High	High	High	High	High	Low	1.45	1.45	0	0.0623	3.554e-05	0.6836	3.94	20	39.6	43.2	46.5	44.4	44.1	36.1	36.1	35.8	46.2	36.5
High	Electron transfer flavoprotein-ubiquinone oxidoreductase, mitochondrial OS=Mus musculus OX=10090 GN=Etfdh PE=1 SV=1	[K].DPSQNINWVVPEGGGGPAYNGM.[-]	1xDeamidated [N20]; 3xOxidation [P11; P17; M22]; 1xTMT6plex [N-Term]	Q921G7 3xOxidation [P605; P611; ]	0.000821689	5.03951e-05	1	2	2	Q921G7	Q921G7 [595-616]	0	2537.15	0	89.8	94.9	27.82	17.12		High	High	High	High	High	High	High	High	High	High	High	Low	-1.28	-1.28	0	0.5175	0.0001564	1	2.18	3	91.6	146.8	86.1	88.1	67.4	100.3	94.9	74.9	105.6	71.6
High	Electron transfer flavoprotein-ubiquinone oxidoreductase, mitochondrial OS=Mus musculus OX=10090 GN=Etfdh PE=1 SV=1	[R].VDHTVGWPLDR.[H]	1xOxidation [P8]; 1xTMT6plex [N-Term]	Q921G7 1xOxidation [P297]	0.00807066	0.000443878	1	2	8	Q921G7	Q921G7 [290-300]	0	1539.81	0	419.6	418.6	4.83	2.54		High	High	High	High	High	High	High	High	High	High	High	High	0.81	0.81	0.0001434	0.0001884	0.002	0.002245	4.03	35	440.6	407.7	431.7	406.3	401.2	408.5	402.5	420.6	429.5	418.6
High	Elongation factor 1-alpha 1 OS=Mus musculus OX=10090 GN=Eef1a1 PE=1 SV=3	[K].SGDAAIVDMVPGKPMCVESFSDYPPLGR.[F]	1xCarbamidomethyl [C16]; 1xOxidation [P/M]; 1xTMT6plex [K13]; 1xTMT6plex [N-Term]	P10126 1xOxidation [P]	0.000218081	0	1	1	4	P10126	P10126 [396-423]	0	3469.72	0	69.4	71.4	6.64	9.1		High	High	High	High	High	High	High	High	High	High	High	High	0.64	0.64	0	0	8.264e-05	1.719e-05	5.18	15	76.7	68.2	68.7	66	77.4	77.7	65.5	75.5	71.4	62.6
High	Elongation factor 1-alpha 2 OS=Mus musculus OX=10090 GN=Eef1a2 PE=1 SV=1	[K].SGDAAIVEMVPGKPMCVESFSQYPPLGR.[F]	1xCarbamidomethyl [C16]; 1xOxidation [P/M]; 1xTMT6plex [K13]; 1xTMT6plex [N-Term]	P62631 1xOxidation [P]	1.46061e-08	0	1	1	29	P62631	P62631 [396-423]	0	3496.77	0	732.5	693.6	7.15	5.05		High	High	High	High	High	High	High	High	High	High	High	High	-1.17	1.98	0	0	3.709e-07	7.3e-09	6.46	29	645.9	730	756.3	776.8	735.1	693.6	681.3	726.8	698.6	632.2
High	Elongation factor 2 OS=Mus musculus OX=10090 GN=Eef2 PE=1 SV=2	[R].YVEPIEDVPCGNIVGLVGVDQFLVK.[T]	1xCarbamidomethyl [C10]; 1xOxidation [P9]; 1xTMT6plex [K25]; 1xTMT6plex [N-Term]	P58252 1xOxidation [P465]	2.68269e-06	0	1	1	2	P58252	P58252 [457-481]	0	3233.75	0	22.4	25.9	34.99	11.04		High	High	High	High	High	High	High	High	High	High	High	High	-2	-2	0	0	2.581e-07	4.89e-06	4.3	60	20.6	24.3	27.1	12.2	12.5	25.9	25.1	21	27.2	28.3
High	Elongation factor 2 OS=Mus musculus OX=10090 GN=Eef2 PE=1 SV=2	[K].IWCFGPDGTGPNILTDITK.[G]	1xCarbamidomethyl [C3]; 1xOxidation [P6]; 1xTMT6plex [K19]; 1xTMT6plex [N-Term]	P58252 1xOxidation [P654]	0.0077061	0.000425444	1	1	2	P58252	P58252 [649-667]	0	2579.36	0	51.2	51.7	13.21	17.1		High	High	High	High	High	High	High	High	High	High	High	High	1.31	1.31	0.0001346	0.0002442	0.001894	0.003347	3.18	25	45.2	64.1	53.7	46.8	48.7	70.1	45.2	51.4	51.7	54.3
Medium	Elongation factor 2 OS=Mus musculus OX=10090 GN=Eef2 PE=1 SV=2	[K].IWCFGPDGTGPNILTDITK.[G]	1xCarbamidomethyl [C3]; 2xOxidation [P6; P11]; 1xTMT6plex [K19]; 1xTMT6plex [N-Term]	P58252 2xOxidation [P654; P659]	0.373552	0.0310775	1	1	2	P58252	P58252 [649-667]	0	2595.35	0	131	130	3.11	1.34		High	High	High	High	High	High	High	High	High	High	Medium	High	-0.24	-0.24	0.01379	0.009992	0.1953	0.1519	3.38	17	129.3	129.8	136.2	132.2	124.1	126.8	131.2	129.2	130.8	130
Medium	Elongation factor 2 OS=Mus musculus OX=10090 GN=Eef2 PE=1 SV=2	[K].DLEEDHACIPIK.[K]	1xCarbamidomethyl [C8]; 1xOxidation [P10]; 1xTMT6plex [K12]; 1xTMT6plex [N-Term]	P58252 1xOxidation [P569]	0.43744	0.0392824	1	1	1	P58252	P58252 [560-571]	0	1914	0					No Quan Values	Medium	Medium	Medium	Medium	Medium	Medium	Medium	Medium	Medium	Medium	n/a	Medium		0.45		0.01316		0.1896	1.99
Medium	Endothelin-converting enzyme 1 OS=Mus musculus OX=10090 GN=Ece1 PE=1 SV=1	[K].ANPVPDGHSR.[W]	1xDeamidated [N2]; 1xOxidation [P5]; 1xTMT6plex [N-Term]	Q4PZA2 1xOxidation [P139]	0.296675	0.022552	1	5	2	Q4PZA2	Q4PZA2 [135-144]	0	1295.65	0	509.8	622.5	14.08	48.14		High	High	High	High	High	High	High	High	High	High	n/a	High		-0.12		0.00712		0.1092	1.81		542.3	618.3	586.9	458.2	438.1	622.5	492.4	463.3	706.7	1314.1
High	Enoyl-CoA delta isomerase 1, mitochondrial OS=Mus musculus OX=10090 GN=Eci1 PE=1 SV=2	[R].NPPVNSLSLECLTEFTISLEK.[L]	1xCarbamidomethyl [C11]; 1xOxidation [P3]; 1xTMT6plex [K21]; 1xTMT6plex [N-Term]	P42125 1xOxidation [P53]	0.0219408	0.00102667	1	1	2	P42125	P42125 [51-71]	0	2865.53	0	37.1	45.5	11.08	6.36		High	High	High	High	High	High	High	High	High	High	High	Medium	1.35	1.35	0.0003101	0.03265	0.006135	0.3705	2.82	20	38.8	39.2	33.7	41.6	30.7	41.5	45.5	47.4	47.2	41.9
Medium	Epsilon-sarcoglycan OS=Mus musculus OX=10090 GN=Sgce PE=1 SV=2	[R].GGRVPLPINDMK.[E]	2xOxidation [P5; P7]; 1xTMT6plex [K12]; 1xTMT6plex [N-Term]	O70258 2xOxidation [P212; P214]	0.455865	0.0419842	1	7	2	O70258	O70258 [208-219]	1	1787.02	0					No Quan Values	Medium	Medium	Medium	Medium	Medium	Medium	Medium	Medium	Medium	Medium	Medium	Medium	3.83	3.83	0.01613	0.01445	0.219	0.2004	2.16	12
Medium	Epsilon-sarcoglycan OS=Mus musculus OX=10090 GN=Sgce PE=1 SV=2	[R].GGRVPLPINDMK.[E]	3xOxidation [P5; P7; M11]; 1xTMT6plex [K12]; 1xTMT6plex [N-Term]	O70258 3xOxidation [P212; P214; ]	0.485836	0.0461897	1	7	1	O70258	O70258 [208-219]	1	1803.02	0	115.7	113.5	11.21	9.13		Medium	Medium	Medium	Medium	Medium	Medium	Medium	Medium	Medium	Medium	Medium	Low	0.46	4.08	0.01482	0.5215	0.2059	1	1.51	9	116.7	116.1	115	115.2	143.5	113.5	99.3	124.2	124.9	112
High	Epsin-3 OS=Mus musculus OX=10090 GN=Epn3 PE=1 SV=1	[R].TPVLPSGPPIADPWAPSSPTR.[K]	5xOxidation [P8; P9; P13; P16; P19]; 1xTMT6plex [N-Term]	Q91W69 5xOxidation [P377; P378; P382; P385; P388]	0.0334649	0.00193525	1	1	1	Q91W69	Q91W69 [370-390]	0	2452.26	0	54.3	63.2	4.21	18.79		High	High	High	High	High	High	High	High	High	High	High	n/a	-4.86		0.0005603		0.009861			5	53.8	51.3	54.7	56.7	53.1	63.2	51.9	56.5	72.6	82.3
Medium	ETS-related transcription factor Elf-2 OS=Mus musculus OX=10090 GN=Elf2 PE=1 SV=1	[R].VVNITSPTHDGSSR.[S]	1xDeamidated [N3]; 1xOxidation [P7]; 1xTMT6plex [N-Term]	Q9JHC9 1xOxidation [P364]	0.339927	0.0272494	1	5	1	Q9JHC9	Q9JHC9 [358-371]	0	1715.88	0					No Quan Values	High	High	High	High	High	High	High	High	High	High	n/a	High		-2.99		0.008659		0.1329	1.26
High	Eukaryotic translation initiation factor 3 subunit G OS=Mus musculus OX=10090 GN=Eif3g PE=1 SV=2	[K].GIPLPTGDTSPEPELLPGDPLPPPK.[E]	5xOxidation [P11; P13; P17; P]; 1xTMT6plex [K25]; 1xTMT6plex [N-Term]	Q9Z1D1 5xOxidation [P43; P45; P49; P]	0.00670776	0.000425444	1	1	7	Q9Z1D1	Q9Z1D1 [33-57]	0	3072.64	0	252.7	283	9.2	4.68		High	High	High	High	High	High	High	High	High	High	High	n/a	-2.11		0.0001257		0.001628			5	231.7	295.9	251.2	269.2	236	300.6	287.6	268.9	269.9	283
High	Eukaryotic translation initiation factor 4E-binding protein 1 OS=Mus musculus OX=10090 GN=Eif4ebp1 PE=1 SV=3	[K].DLPAIPGVTSPTSDEPPMQASQSQLPSSPEDK.[R]	1xOxidation [P]; 1xTMT6plex [K32]; 1xTMT6plex [N-Term]	Q60876 1xOxidation [P]	2.33069e-05	0	1	1	2	Q60876	Q60876 [73-104]	0	3780.89	0	33.4	36.3	10.86	8.76		High	High	High	High	High	High	High	High	High	High	High	High	3.53	3.53	0	0	2.902e-06	5.118e-05	5.01	47	33.9	31.6	34.8	32.8	37.6	40.4	38.2	32.6	36.3	33.8
High	Eukaryotic translation initiation factor 4E-binding protein 1 OS=Mus musculus OX=10090 GN=Eif4ebp1 PE=1 SV=3	[K].DLPAIPGVTSPTSDEPPMQASQSQLPSSPEDK.[R]	5xOxidation [P11; P16; P17; M18; P26]; 1xTMT6plex [K32]; 1xTMT6plex [N-Term]	Q60876 5xOxidation [P83; P88; P89; P98; ]	0.000534885	0	1	1	1	Q60876	Q60876 [73-104]	0	3844.87	0					No Quan Values	High	High	High	High	High	High	High	High	High	High	High	n/a	0.03		0		9.711e-05			5
High	Eukaryotic translation initiation factor 4E-binding protein 1 OS=Mus musculus OX=10090 GN=Eif4ebp1 PE=1 SV=3	[K].TPPKDLPAIPGVTSPTSDEPPMQASQSQLPSSPEDK.[R]	5xOxidation [P3; P7; P10; P15; M22]; 2xTMT6plex [K4; K36]; 1xTMT6plex [N-Term]	Q60876 5xOxidation [P71; P75; P78; P83; ]	0.0962432	0.00692993	1	1	1	Q60876	Q60876 [69-104]	1	4497.28	0	41.3	44.4	13.5	10.06		High	High	High	High	High	High	High	High	High	High	High	n/a	-2.2		0.002117		0.03228			11	41.3	34	35.8	49.3	43.9	48.4	41.6	41.2	51.9	44.4
High	Eukaryotic translation initiation factor 4E-binding protein 1 OS=Mus musculus OX=10090 GN=Eif4ebp1 PE=1 SV=3	[K].DLPAIPGVTSPTSDEPPMQASQSQLPSSPEDKR.[A]	5xOxidation [P6; P11; P16; P17; M18]; 1xTMT6plex [K32]; 1xTMT6plex [N-Term]	Q60876 5xOxidation [P78; P83; P88; P89; ]	0.00522402	0.000414721	1	1	1	Q60876	Q60876 [73-105]	1	4000.97	0	25.8	26.3	28.2	5.3		High	High	High	High	High	High	High	High	High	High	High	n/a	0.31		0.0001242		0.001226			21	24.2	39.6	27.5	20.6	20.1	26.3	29.4	25.9	27.2	26.1
Medium	Exocyst complex component 3-like 2 OS=Mus musculus OX=10090 GN=Exoc3l2 PE=1 SV=2	[R].LVPAGEAAPEPPPK.[V]	3xOxidation [P9; P11; P12]; 1xTMT6plex [K14]; 1xTMT6plex [N-Term]	D3YUP5 3xOxidation [P156; P158; P159]	0.247259	0.0184275	1	1	1	D3YUP5	D3YUP5 [148-161]	0	1879.06	0					No Quan Values	High	High	High	High	High	High	High	High	High	High	n/a	High		-5.18		0.005817		0.08484	1.9
Medium	Expressed sequence AA415398 OS=Mus musculus OX=10090 GN=Frg2f1 PE=2 SV=1	[K].LGSLLTPEQLSQLR.[Q]	1xDeamidated [Q12]; 1xOxidation [P7]; 1xTMT6plex [N-Term]	Q6P3A2 1xOxidation [P153]	0.424595	0.0374702	1	1	1	Q6P3A2	Q6P3A2 [147-160]	0	1801.03	0	64.8	68	6.89	9.69		Medium	Medium	Medium	Medium	Medium	Medium	Medium	Medium	Medium	Medium	n/a	Medium		-3.88		0.01221		0.1807	1.96		65.2	70.6	63.3	69.2	64.4	68	65.6	64.5	72.9	81.2
Medium	F-box/WD repeat-containing protein 7 OS=Mus musculus OX=10090 GN=Fbxw7 PE=1 SV=2	[R].ITSVQPPTGLQEWLK.[M]	1xDeamidated [Q11]; 1xOxidation [P7]; 1xTMT6plex [K15]; 1xTMT6plex [N-Term]	Q8VBV4 1xOxidation [P234]	0.419532	0.0367814	1	3	1	Q8VBV4	Q8VBV4 [228-242]	0	2172.23	0					No Quan Values	Medium	Medium	Medium	Medium	Medium	Medium	Medium	Medium	Medium	Medium	n/a	Medium		0.27		0.01191		0.1778	1.85
High	Fibrillin-1 OS=Mus musculus OX=10090 GN=Fbn1 PE=1 SV=2	[R].GGPEPPASSEMDDNSLSPEACYECK.[I]	2xCarbamidomethyl [C21; C24]; 5xOxidation [P3; P5; P6; M11; P18]; 1xTMT6plex [K25]; 1xTMT6plex [N-Term]	Q61554 5xOxidation [P2699; P2701; P2702; P2714; ]	0.0532711	0.0038203	1	1	1	Q61554	Q61554 [2697-2721]	0	3265.39	0	87.6	85	22.03	26.52		High	High	High	High	High	High	High	High	High	High	High	n/a	-1.74		0.001086		0.0166			10	86.8	127.9	88.3	118.9	77.9	117.8	103.3	85	58.7	74.6
Medium	Fibrillin-1 OS=Mus musculus OX=10090 GN=Fbn1 PE=1 SV=2	[R].GQCVNTPGDFECK.[C]	2xCarbamidomethyl [C3; C12]; 1xDeamidated [N5]; 1xOxidation [P7]; 1xTMT6plex [K13]; 1xTMT6plex [N-Term]	Q61554 1xOxidation [P1092]	0.232255	0.0172736	1	1	2	Q61554	Q61554 [1086-1098]	0	1986.93	0	295.8	292.8	5.1	9.5		High	High	High	High	High	High	High	High	High	High	Medium	High	5.05	6.5	0.01764	0.005361	0.2341	0.0774	1.6	4	325.2	295	296.7	286.7	308	271.1	292.8	301.3	340.5	273.2
High	Fibrillin-1 OS=Mus musculus OX=10090 GN=Fbn1 PE=1 SV=2	[R].GQCVNTPGDFECK.[C]	2xCarbamidomethyl [C3; C12]; 1xOxidation [P7]; 1xTMT6plex [K13]; 1xTMT6plex [N-Term]	Q61554 1xOxidation [P1092]	0.00370711	0.000294152	1	1	2	Q61554	Q61554 [1086-1098]	0	1985.95	0	150.2	141.4	10.88	10.93		High	High	High	High	High	High	High	High	High	High	High	High	0.14	0.14	0.000183	2.892e-05	0.002526	0.0004947	3.57	34	183.8	152.6	147.8	164.8	135.3	141.4	127.1	164.5	144.8	127.2
High	Fibrillin-1 OS=Mus musculus OX=10090 GN=Fbn1 PE=1 SV=2	[R].SCTDIDECEDNPNICDGGQCTNIPGEYR.[C]	4xCarbamidomethyl [C2; C8; C15; C20]; 1xOxidation [P24]; 1xTMT6plex [N-Term]	Q61554 1xOxidation [P1260]	1.12432e-10	0	1	1	6	Q61554	Q61554 [1237-1264]	0	3534.44	0	155.2	152.8	6.82	6.22		High	High	High	High	High	High	High	High	High	High	High	High	-0.85	1.77	0	0	2.974e-10	1.779e-07	7.76	60	155.2	158.9	138.1	162.4	139.1	152.8	135.4	156.6	159.7	151.5
High	Fibrillin-1 OS=Mus musculus OX=10090 GN=Fbn1 PE=1 SV=2	[R].SCTDIDECEDNPNICDGGQCTNIPGEYR.[C]	4xCarbamidomethyl [C2; C8; C15; C20]; 2xDeamidated [N/Q]; 1xOxidation [P24]; 1xTMT6plex [N-Term]	Q61554 1xOxidation [P1260]	2.97476e-08	0	1	1	2	Q61554	Q61554 [1237-1264]	0	3536.4	0	34.5	27.7	14.32	17.99		High	High	High	High	High	High	High	High	High	High	High	High	8.13	8.13	0	0	1.662e-09	3.512e-06	6.56	70	41.6	34.8	26.7	31.9	34.2	27.7	21.9	25.6	32.4	34.5
Medium	Folate transporter 1 OS=Mus musculus OX=10090 GN=Slc19a1 PE=1 SV=1	[R].GALPCELDQMHPGPDRPETR.[K]	1xCarbamidomethyl [C5]; 2xOxidation [P14; P17]; 1xTMT6plex [N-Term]	P41438 2xOxidation [P231; P234]	0.359823	0.0294776	1	5	4	P41438	P41438 [218-237]	0	2537.21	0	117.5	119.9	7.64	9.24		High	High	High	High	High	High	High	High	High	High	Medium	High	4.13	4.13	0.01514	0.009306	0.2081	0.1431	2.75	2	117.1	115.7	121.9	106	117.8	110.5	119.9	101.2	124.7	127.2
Medium	Fructose-1,6-bisphosphatase isozyme 2 OS=Mus musculus OX=10090 GN=Fbp2 PE=1 SV=2	[R].VPLILGSPEDVQEYLSCVQR.[N]	1xCarbamidomethyl [C17]; 1xOxidation [P8]; 1xTMT6plex [N-Term]	P70695 1xOxidation [P322]	0.189971	0.0135679	1	1	1	P70695	P70695 [315-334]	0	2547.33	0	16.8	16.2	23.29	14.28		High	High	High	High	High	High	High	High	High	High	n/a	High		2.89		0.00424		0.05935	1.99		16.9	23.5	18.3	11.4	16.7	16.2	14.8	19.5	14.5	19.3
High	Fructose-bisphosphate aldolase A OS=Mus musculus OX=10090 GN=Aldoa PE=1 SV=2	[K].GVVPLAGTNGETTTQGLDGLSER.[C]	1xOxidation [P4]; 1xTMT6plex [N-Term]	P05064 1xOxidation [P115]	1.19976e-07	0	1	9	6	P05064	P05064 [112-134]	0	2517.3	0	102.7	91	6.34	11.67		High	High	High	High	High	High	High	High	High	High	High	High	0.85	1.89	0	0	7.98e-09	1.542e-06	5.06	27	103.6	101.8	117.4	98.4	103.1	80.1	88.1	91.3	109.4	91
High	Fructose-bisphosphate aldolase A OS=Mus musculus OX=10090 GN=Aldoa PE=1 SV=2	[K].GVVPLAGTNGETTTQGLDGLSER.[C]	2xDeamidated [N9; Q15]; 1xOxidation [P4]; 1xTMT6plex [N-Term]	P05064 1xOxidation [P115]	0.000325993	0	1	9	2	P05064	P05064 [112-134]	0	2519.27	0	121.6	120.6	8.67	2.85		High	High	High	High	High	High	High	High	High	High	High	High	14.39	14.39	0	0.0002888	5.565e-05	0.003974	3.62	32	127.4	116	138.7	115	110.1	124.2	120.6	118	125.7	118.4
High	Fructose-bisphosphate aldolase C OS=Mus musculus OX=10090 GN=Aldoc PE=1 SV=4	[R].TVPPAVPGVTFLSGGQSEEEASLNLNAINR.[C]	1xDeamidated [N29]; 2xOxidation [P4; P7]; 1xTMT6plex [N-Term]	P05063 2xOxidation [P263; P266]	0.035296	0.00209882	1	1	1	P05063	P05063 [260-289]	0	3329.71	0	22.6	24.7	10.12	8.38		High	High	High	High	High	High	High	High	High	High	High	n/a	11.23		0.0006048		0.01051			13	20.7	22.1	23.2	19.2	25.3	24.7	23	27.5	23.2	27
High	Fructose-bisphosphate aldolase C OS=Mus musculus OX=10090 GN=Aldoc PE=1 SV=4 Fructose-bisphosphate aldolase A OS=Mus musculus OX=10090 GN=Aldoa PE=1 SV=2	[R].YASICQQNGIVPIVEPEILPDGDHDLK.[R]	1xCarbamidomethyl [C5]; 1xDeamidated [N/Q]; 2xOxidation [P12; P16]; 1xTMT6plex [K27]; 1xTMT6plex [N-Term]	P05063 2xOxidation [P185; P189]; P05064 2xOxidation [P185; P189]	0.000194932	0	2	4	3	P05063; P05064	P05063 [174-200]; P05064 [174-200]	0	3511.8	0	53.3	52.5	8.9	13.05	Shared	High	High	High	High	High	High	High	High	High	High	High	High	-5.77	-5.77	0	2.328e-05	3.141e-05	0.0004377	4.7	15	55.5	56.7	51.1	50.2	60.6	48.2	45.4	55.6	63.2	52.5
High	Fructose-bisphosphate aldolase C OS=Mus musculus OX=10090 GN=Aldoc PE=1 SV=4 Fructose-bisphosphate aldolase A OS=Mus musculus OX=10090 GN=Aldoa PE=1 SV=2	[R].YASICQQNGIVPIVEPEILPDGDHDLKR.[C]	1xCarbamidomethyl [C5]; 1xDeamidated [N8]; 2xOxidation [P12; P16]; 1xTMT6plex [K27]; 1xTMT6plex [N-Term]	P05063 2xOxidation [P185; P189]; P05064 2xOxidation [P185; P189]	0.0253544	0.00121065	2	4	3	P05063; P05064	P05063 [174-201]; P05064 [174-201]	1	3667.9	0	117	126.1	9.78	6.89	Shared	High	High	High	High	High	High	High	High	High	High	High	High	-2.71	-2.71	0.001137	0.0003497	0.01731	0.004885	4.76	7	108.9	107.1	136.1	122.2	112.1	127.1	113.1	126.1	132.9	115.1
High	Fructose-bisphosphate aldolase C OS=Mus musculus OX=10090 GN=Aldoc PE=1 SV=4 Fructose-bisphosphate aldolase A OS=Mus musculus OX=10090 GN=Aldoa PE=1 SV=2	[R].YASICQQNGIVPIVEPEILPDGDHDLK.[R]	1xCarbamidomethyl [C5]; 1xDeamidated [Q/N]; 1xOxidation [P12]; 1xTMT6plex [K27]; 1xTMT6plex [N-Term]	P05063 1xOxidation [P185]; P05064 1xOxidation [P185]	2.6577e-06	0	2	4	14	P05063; P05064	P05063 [174-200]; P05064 [174-200]	0	3495.81	0	400.8	385.6	2.7	4.43	Shared	High	High	High	High	High	High	High	High	High	High	High	High	-1.48	2.7	0	0	1.155e-05	3.673e-06	6.08	31	419.9	398.6	409.7	398.7	388.1	385.6	373.1	414.2	403	378.2
High	Fructose-bisphosphate aldolase C OS=Mus musculus OX=10090 GN=Aldoc PE=1 SV=4 Fructose-bisphosphate aldolase A OS=Mus musculus OX=10090 GN=Aldoa PE=1 SV=2	[R].YASICQQNGIVPIVEPEILPDGDHDLKR.[C]	1xCarbamidomethyl [C5]; 1xDeamidated [Q/N]; 1xOxidation [P12]; 1xTMT6plex [K27]; 1xTMT6plex [N-Term]	P05063 1xOxidation [P185]; P05064 1xOxidation [P185]	2.73338e-06	0	2	4	20	P05063; P05064	P05063 [174-201]; P05064 [174-201]	1	3651.91	0	531.2	565.6	7.82	5.42	Shared	High	High	High	High	High	High	High	High	High	High	High	High	1.05	1.17	0	0	9.587e-05	4.032e-06	6.62	8	486.8	558.9	559.1	504.9	504.9	553.6	519.3	565.7	565.6	604.3
High	Fructose-bisphosphate aldolase C OS=Mus musculus OX=10090 GN=Aldoc PE=1 SV=4 Fructose-bisphosphate aldolase A OS=Mus musculus OX=10090 GN=Aldoa PE=1 SV=2	[R].YASICQQNGIVPIVEPEILPDGDHDLKR.[C]	1xCarbamidomethyl [C5]; 1xOxidation [P12]; 1xTMT6plex [K27]; 1xTMT6plex [N-Term]	P05063 1xOxidation [P185]; P05064 1xOxidation [P185]	0.000423492	0	2	4	5	P05063; P05064	P05063 [174-201]; P05064 [174-201]	1	3650.93	0	129	139.1	7.94	9.56	Shared	High	High	High	High	High	High	High	High	High	High	High	High	-7.15	-4.9	0	0	9.883e-05	3.778e-05	5.87	2	130.6	127.5	148.7	119.3	126.2	137.7	125.4	139.1	156.2	157.9
High	Fructose-bisphosphate aldolase C OS=Mus musculus OX=10090 GN=Aldoc PE=1 SV=4 Fructose-bisphosphate aldolase A OS=Mus musculus OX=10090 GN=Aldoa PE=1 SV=2	[R].YASICQQNGIVPIVEPEILPDGDHDLK.[R]	1xCarbamidomethyl [C5]; 1xOxidation [P12]; 1xTMT6plex [K27]; 1xTMT6plex [N-Term]	P05063 1xOxidation [P185]; P05064 1xOxidation [P185]	3.75749e-06	0	2	4	10	P05063; P05064	P05063 [174-200]; P05064 [174-200]	0	3494.82	0	237.5	229.6	5.73	6.34	Shared	High	High	High	High	High	High	High	High	High	High	High	High	-8.75	-9.59	0	0	6.659e-07	5.127e-06	6.55	39	235.4	212.2	244	248.8	225.5	224.5	229.6	247.1	207.4	234.5
High	Fructose-bisphosphate aldolase C OS=Mus musculus OX=10090 GN=Aldoc PE=1 SV=4 Fructose-bisphosphate aldolase A OS=Mus musculus OX=10090 GN=Aldoa PE=1 SV=2	[R].YASICQQNGIVPIVEPEILPDGDHDLK.[R]	1xCarbamidomethyl [C5]; 2xDeamidated [Q/N]; 1xOxidation [P12]; 1xTMT6plex [K27]; 1xTMT6plex [N-Term]	P05063 1xOxidation [P185]; P05064 1xOxidation [P185]	7.58588e-09	0	2	4	4	P05063; P05064	P05063 [174-200]; P05064 [174-200]	0	3496.79	0	73.2	72.2	5.8	8.21	Shared	High	High	High	High	High	High	High	High	High	High	High	High	6.51	6.51	0	0	3.61e-10	3.894e-09	6.3	47	74.4	78.3	73	69.1	66.3	67.7	69.7	83.2	72.2	73.9
High	Fructose-bisphosphate aldolase C OS=Mus musculus OX=10090 GN=Aldoc PE=1 SV=4 Fructose-bisphosphate aldolase A OS=Mus musculus OX=10090 GN=Aldoa PE=1 SV=2	[R].YASICQQNGIVPIVEPEILPDGDHDLK.[R]	1xCarbamidomethyl [C5]; 3xDeamidated [Q6; Q7; N8]; 1xOxidation [P12]; 1xTMT6plex [K27]; 1xTMT6plex [N-Term]	P05063 1xOxidation [P185]; P05064 1xOxidation [P185]	8.97238e-06	0	2	4	2	P05063; P05064	P05063 [174-200]; P05064 [174-200]	0	3497.78	0					No Quan Values	High	High	High	High	High	High	High	High	High	High	High	High	9.67	9.67	0	0	9.928e-07	8.711e-06	4.14	36
Medium	Fucose-1-phosphate guanylyltransferase OS=Mus musculus OX=10090 GN=Fpgt PE=1 SV=1	[K].VLLIHSGGYSQRLPNASALGK.[I]	2xDeamidated [Q11; N15]; 1xOxidation [P14]; 1xTMT6plex [K21]; 1xTMT6plex [N-Term]	G5E8F4 1xOxidation [P114]	0.194194	0.0140189	1	1	1	G5E8F4	G5E8F4 [101-121]	1	2657.5	0					No Quan Values	High	High	High	High	High	High	High	High	High	High	High	n/a	8.1		0.004264		0.07222			1
High	Fumarate hydratase, mitochondrial OS=Mus musculus OX=10090 GN=Fh PE=1 SV=3	[R].SGLGELILPENEPGSSIMPGK.[V]	1xDeamidated [N11]; 1xOxidation [P/M]; 1xTMT6plex [K21]; 1xTMT6plex [N-Term]	P97807 1xOxidation [P]	1.15518e-05	0	1	2	4	P97807	P97807 [348-368]	0	2600.39	0	179.7	144.7	12.41	9.96		High	High	High	High	High	High	High	High	High	High	High	High	8.97	8.97	0	0	1.329e-06	1.059e-06	4.85	50	184.2	178.6	155.9	197.3	180.8	144.7	156.9	163	129.3	133.6
High	Fumarate hydratase, mitochondrial OS=Mus musculus OX=10090 GN=Fh PE=1 SV=3	[R].SGLGELILPENEPGSSIMPGK.[V]	1xDeamidated [N11]; 2xOxidation [P9; M18]; 1xTMT6plex [K21]; 1xTMT6plex [N-Term]	P97807 2xOxidation [P356; ]	0.0114603	0.000551893	1	2	2	P97807	P97807 [348-368]	0	2616.38	0	13.1	16.5	16.63	12.65		High	High	High	High	High	High	High	High	High	High	High	High	14.67	14.67	0.0001857	0.0003794	0.002948	0.00543	2.57	5	13.8	16	10.9	12.4	16.6	16.6	19.3	14	16.5	14.7
High	Fumarate hydratase, mitochondrial OS=Mus musculus OX=10090 GN=Fh PE=1 SV=3	[K].LNDHFPLVVWQTGSGTQTNMNVNEVISNR.[A]	1xDeamidated [N2]; 2xOxidation [P6; M20]; 1xTMT6plex [N-Term]	P97807 2xOxidation [P134; ]	0.000134091	0	1	2	4	P97807	P97807 [129-157]	0	3532.73	0	36.7	42.4	22.99	19.32		High	High	High	High	High	High	High	High	High	High	High	High	0.3	0.3	0	1.196e-05	2.053e-05	0.0002595	5.23	9	32.4	55	47.3	32.4	39.1	58.5	35.6	42.4	41.3	43.2
High	Fumarate hydratase, mitochondrial OS=Mus musculus OX=10090 GN=Fh PE=1 SV=3	[K].ETAIELGYLTAEQFDEWVKPK.[D]	1xDeamidated [Q13]; 1xOxidation [P20]; 2xTMT6plex [K19; K21]; 1xTMT6plex [N-Term]	P97807 1xOxidation [P500]	0.000571015	0	1	3	2	P97807	P97807 [481-501]	0	3171.71	0	129	132.3	8.98	8.33		High	High	High	High	High	High	High	High	High	High	High	High	11.6	11.6	0	6.045e-05	0.0001048	0.0009657	3.85	31	127.2	135.5	130.8	106.3	119.4	138.4	132.3	135.9	119.2	114.3
High	Fumarate hydratase, mitochondrial OS=Mus musculus OX=10090 GN=Fh PE=1 SV=3	[R].SGLGELILPENEPGSSIMPGK.[V]	1xOxidation [P/M]; 1xTMT6plex [K21]; 1xTMT6plex [N-Term]	P97807 1xOxidation [P]	1.12432e-10	0	1	2	210	P97807	P97807 [348-368]	0	2599.41	0	7482.6	6556.6	11.32	8.94		High	High	High	High	High	High	High	High	High	High	High	High	-3.07	1.97	0	0	1.214e-06	3.133e-11	6.12	42	7270.3	7722.9	6486.8	7919.8	7701.2	6564	6556.6	6864.8	5586.9	5753.9
High	Fumarate hydratase, mitochondrial OS=Mus musculus OX=10090 GN=Fh PE=1 SV=3	[K].ETAIELGYLTAEQFDEWVKPK.[D]	1xOxidation [P20]; 2xTMT6plex [K19; K21]; 1xTMT6plex [N-Term]	P97807 1xOxidation [P500]	6.53213e-10	0	1	3	8	P97807	P97807 [481-501]	0	3170.72	0	636.1	619.6	7.11	9.47		High	High	High	High	High	High	High	High	High	High	High	High	-0.06	3.24	0	0	4.96e-07	4.869e-12	7.32	13	619.8	599.3	675.2	652.9	556.9	583.6	684.2	648.9	619.6	533.8
High	Fumarate hydratase, mitochondrial OS=Mus musculus OX=10090 GN=Fh PE=1 SV=3	[K].VAALTGLPFVTAPNK.[F]	1xOxidation [P8]; 1xTMT6plex [K15]; 1xTMT6plex [N-Term]	P97807 1xOxidation [P301]	0.000222198	0	1	2	2	P97807	P97807 [294-308]	0	1973.18	0					No Quan Values	High	High	High	High	High	High	High	High	High	High	High	High	9.89	9.89	0	0	3.617e-05	3.167e-05	3.21	22
High	Fumarate hydratase, mitochondrial OS=Mus musculus OX=10090 GN=Fh PE=1 SV=3	[K].LNDHFPLVVWQTGSGTQTNMNVNEVISNR.[A]	2xOxidation [P6; M20]; 1xTMT6plex [N-Term]	P97807 2xOxidation [P134; ]	4.83775e-06	0	1	2	12	P97807	P97807 [129-157]	0	3531.75	0	193.4	190.9	4.43	3.4		High	High	High	High	High	High	High	High	High	High	High	High	-4.44	2.99	0	0	7.282e-07	2.953e-05	5.7	35	188	199.3	201.2	180.2	199.1	192.4	190.9	198.5	185.9	181.6
High	FYVE, RhoGEF and PH domain-containing protein 1 OS=Mus musculus OX=10090 GN=Fgd1 PE=1 SV=2	[K].SLSLDPGQSLEPHPEGPQR.[L]	2xDeamidated [Q8; Q18]; 1xOxidation [P12]; 1xTMT6plex [N-Term]	P52734 1xOxidation [P125]	0.0410117	0.00256034	1	1	2	P52734	P52734 [114-132]	0	2291.14	0	69.4	76.2	10.8	7.27		High	High	High	High	High	High	High	High	High	High	High	Medium	-4.98	-4.98	0.0007427	0.01007	0.01245	0.1532	2.51	1	71.1	83.5	80.1	67.7	64.6	67.7	76.2	77.3	78.5	67.8
Medium	G2 and S phase-expressed protein 1 OS=Mus musculus OX=10090 GN=Gtse1 PE=1 SV=2	[K].VPTLSPLTQQPQTPEQR.[G]	1xOxidation [P2]; 1xTMT6plex [N-Term]	Q8R080 1xOxidation [P395]	0.368934	0.0303989	1	1	1	Q8R080	Q8R080 [394-410]	0	2165.18	0	156.1	162.8	4.33	2.26		High	High	High	High	High	High	High	High	High	High	High	Low	13.63	13.63	0.0097	0.09603	0.1513	0.9092	2.47	9	162.9	144.9	158.9	158.4	153.8	159.2	157.9	162.8	167.1	163.5
High	Gap junction alpha-1 protein OS=Mus musculus OX=10090 GN=Gja1 PE=1 SV=2	[K].YAYFNGCSSPTAPLSPMSPPGYK.[L]	1xCarbamidomethyl [C7]; 1xDeamidated [N5]; 5xOxidation [P13; P16; M17; P19; P20]; 1xTMT6plex [K23]; 1xTMT6plex [N-Term]	P23242 5xOxidation [P277; P280; P283; P284; ]	0.00410528	0.000294152	1	1	1	P23242	P23242 [265-287]	0	3031.41	0	36.4	35.3	5.03	7.54		High	High	High	High	High	High	High	High	High	High	High	n/a	-4.41		9.157e-05		0.0009429			5	35.6	38.8	38.4	35.6	37.2	35.1	41.4	35.3	35.8	35
Medium	GATOR complex protein WDR24 OS=Mus musculus OX=10090 GN=Wdr24 PE=1 SV=1	[R].DASQPVER.[A]	1xDeamidated [Q4]; 1xOxidation [P5]; 1xTMT6plex [N-Term]	Q8CFJ9 1xOxidation [P334]	0.483061	0.0458132	1	1	2	Q8CFJ9	Q8CFJ9 [330-337]	0	1147.58	0	164	150.7	15.82	16.32		Medium	Medium	Medium	Medium	Medium	Medium	Medium	Medium	Medium	Medium	Medium	Medium	0.23	0.23	0.0147	0.04348	0.2046	0.49	1.94	8	161.3	139	131.5	168.7	203.9	116	122.8	150.7	157.5	171.1
Medium	GDH/6PGL endoplasmic bifunctional protein OS=Mus musculus OX=10090 GN=H6pd PE=1 SV=2	[K].EVQDQPGLR.[L]	1xDeamidated [Q3]; 1xOxidation [P6]; 1xTMT6plex [N-Term]	Q8CFX1 1xOxidation [P432]	0.272039	0.0204728	1	2	2	Q8CFX1	Q8CFX1 [427-435]	0	1287.67	0	108.1	119	25.65	22.22		High	High	High	High	High	High	High	High	High	High	Medium	High	0.17	0.17	0.01242	0.00654	0.1807	0.09714	1.91	6	92.1	152.8	113.6	102.9	78.1	119	93.3	133.6	168.8	114.8
Medium	General vesicular transport factor p115 OS=Mus musculus OX=10090 GN=Uso1 PE=1 SV=2	[R].VLVSPTNPPGATSSCQK.[A]	1xCarbamidomethyl [C15]; 1xDeamidated [N7]; 2xOxidation [P8; P9]; 1xTMT6plex [K17]; 1xTMT6plex [N-Term]	Q9Z1Z0 2xOxidation [P296; P297]	0.404597	0.0350034	1	3	1	Q9Z1Z0	Q9Z1Z0 [289-305]	0	2234.17	0	6.6	5.5	24.18	19.02		Medium	Medium	Medium	Medium	Medium	Medium	Medium	Medium	Medium	Medium	Low	Medium	12.67	-8.76	0.2681	0.0112	1	0.1693	0.94	0	8.2	7.1	4.5	6.1	4.5	5.2	3.7	5.6	5.5	6.5
Medium	Glucocorticoid-induced transcript 1 protein OS=Mus musculus OX=10090 GN=Glcci1 PE=1 SV=1	[R].GPSPSSPTPPPAAAPAEQAPR.[A]	1xDeamidated [Q18]; 6xOxidation [P2; P4; P7; P9; P10; P11]; 1xTMT6plex [N-Term]	Q8K3I9 6xOxidation [P95; P97; P100; P102; P103; P104]	0.221071	0.0162292	1	1	1	Q8K3I9	Q8K3I9 [94-114]	0	2309.11	0	40.2	40.6	16.14	12.49		High	High	High	High	High	High	High	High	High	High	High	n/a	2.08		0.004927		0.08377			3	54.3	41.4	39.1	36.1	41.3	49.3	40.6	37.5	40	48.7
High	Glutamate dehydrogenase 1, mitochondrial OS=Mus musculus OX=10090 GN=Glud1 PE=1 SV=1	[K].VYEGSILEADCDILIPAASEK.[Q]	1xCarbamidomethyl [C11]; 1xOxidation [P16]; 1xTMT6plex [K21]; 1xTMT6plex [N-Term]	P26443 1xOxidation [P381]	3.3899e-06	0	1	2	2	P26443	P26443 [366-386]	0	2767.45	0					No Quan Values	High	High	High	High	High	High	High	High	High	High	High	High	0.6	0.6	0	0	3.369e-07	6.566e-06	4.28	31
High	Glutamine amidotransferase-like class 1 domain-containing protein 3A, mitochondrial OS=Mus musculus OX=10090 GN=Gatd3a PE=1 SV=1	[K].GVEVTVGHEQEEGGKWPYAGTAEAIK.[A]	1xOxidation [P17]; 2xTMT6plex [K15; K26]; 1xTMT6plex [N-Term]	Q9D172 1xOxidation [P203]	4.93017e-07	0	1	3	2	Q9D172	Q9D172 [187-212]	1	3445.82	0	48.1	49.4	15.05	19.14		High	High	High	High	High	High	High	High	High	High	High	High	3.75	3.75	0	0	9.497e-08	1.244e-08	5.88	31	51.1	39.6	54.8	45.3	37.6	39.5	49.4	51.5	61.2	39.2
High	Glutamine amidotransferase-like class 1 domain-containing protein 3A, mitochondrial OS=Mus musculus OX=10090 GN=Gatd3a PE=1 SV=1	[K].KPIGLCCIAPVLAAK.[V]	2xCarbamidomethyl [C6; C7]; 1xOxidation [P]; 2xTMT6plex [K1; K15]; 1xTMT6plex [N-Term]	Q9D172 1xOxidation [P]	0.0104515	0.000540209	1	2	14	Q9D172	Q9D172 [169-183]	0	2314.4	0	1034.5	1044.5	5.25	5.54		High	High	High	High	High	High	High	High	High	High	High	High	0.58	2.28	0.0002896	0.0001256	0.005685	0.0017	3.45	5	1079.3	973.6	1010.1	956.3	1059.5	1034	1044.5	1010.6	1047.6	1161.5
High	Glyceraldehyde-3-phosphate dehydrogenase OS=Mus musculus OX=10090 GN=Gapdh PE=1 SV=2	[K].LVINGKPITIFQER.[D]	1xDeamidated [N4]; 1xOxidation [P7]; 1xTMT6plex [K6]; 1xTMT6plex [N-Term]	P16858 1xOxidation [P71]	0.00157723	0.000170585	1	6	4	P16858	P16858 [65-78]	0	2103.26	0	454.7	449.9	6.44	6.45		High	High	High	High	High	High	High	High	High	High	High	High	0.1	0.89	3.847e-05	6.55e-05	0.0003257	0.00101	3.43	2	462	418.8	474.5	424.9	447.5	430.2	483.4	449.9	500.8	441.5
High	Glyceraldehyde-3-phosphate dehydrogenase OS=Mus musculus OX=10090 GN=Gapdh PE=1 SV=2	[R].DPTNIKWGEAGAEYVVESTGVFTTMEK.[A]	1xOxidation [P2]; 2xTMT6plex [K6; K27]; 1xTMT6plex [N-Term]	P16858 1xOxidation [P80]	0.0238025	0.00107996	1	5	4	P16858	P16858 [79-105]	1	3662.89	0					No Quan Values	High	High	High	High	High	High	High	High	High	High	High	Medium	-13.07	-13.66	0.0003218	0.02675	0.006756	0.3106	3.6	29
High	Glyceraldehyde-3-phosphate dehydrogenase OS=Mus musculus OX=10090 GN=Gapdh PE=1 SV=2	[K].LVINGKPITIFQER.[D]	1xOxidation [P7]; 1xTMT6plex [K6]; 1xTMT6plex [N-Term]	P16858 1xOxidation [P71]	0.00193527	0.000188861	1	6	3	P16858	P16858 [65-78]	0	2102.27	0	194.7	179.9	5.51	6.36		High	High	High	High	High	High	High	High	High	High	n/a	High		-0.89		2.328e-05		0.000459	3.72		194.5	197.8	199.2	176.8	194.9	179	179.9	186.9	202.7	171.8
High	Glyceraldehyde-3-phosphate dehydrogenase OS=Mus musculus OX=10090 GN=Gapdh PE=1 SV=2	[R].GAAQNIIPASTGAAK.[A]	1xOxidation [P8]; 1xTMT6plex [K15]; 1xTMT6plex [N-Term]	P16858 1xOxidation [P206]	0.00353908	0.000275174	1	5	1	P16858	P16858 [199-213]	0	1844.06	0	81	80.4	13.24	3.69		High	High	High	High	High	High	High	High	High	High	n/a	High		0.21		2.892e-05		0.0004703	3		80.2	81.8	99.6	79.2	87.5	75.3	82.9	81.4	78.5	80.4
High	Glyceraldehyde-3-phosphate dehydrogenase OS=Mus musculus OX=10090 GN=Gapdh PE=1 SV=2	[K].IVSNASCTTNCLAPLAK.[V]	2xCarbamidomethyl [C7; C11]; 1xDeamidated [N]; 1xOxidation [P14]; 1xTMT6plex [K17]; 1xTMT6plex [N-Term]	P16858 1xOxidation [P157]	6.71424e-07	0	1	1	11	P16858	P16858 [144-160]	0	2295.21	9	1273.2	1281.3	3.18	3.36		High	High	High	High	High	High	High	High	High	High	High	n/a	-1.18		0		1.581e-05			9	1250.9	1219.4	1302.1	1225.2	1308.9	1222.6	1268.2	1281.3	1310.7	1336.1
High	Glyceraldehyde-3-phosphate dehydrogenase OS=Mus musculus OX=10090 GN=Gapdh PE=1 SV=2	[K].IVSNASCTTNCLAPLAK.[V]	2xCarbamidomethyl [C7; C11]; 1xOxidation [P14]; 1xTMT6plex [K17]; 1xTMT6plex [N-Term]	P16858 1xOxidation [P157]	2.08311e-05	0	1	1	17	P16858	P16858 [144-160]	0	2294.22	17	3065.3	3373.9	10.75	3.12		High	High	High	High	High	High	High	High	High	High	High	n/a	-4.89		0		1.4e-05			35	3125.1	3006.7	3431.4	2840.9	2869.4	3294.8	3261.2	3496.9	3476.4	3373.9
High	Glyceraldehyde-3-phosphate dehydrogenase, testis-specific OS=Mus musculus OX=10090 GN=Gapdhs PE=1 SV=1 Glyceraldehyde-3-phosphate dehydrogenase OS=Mus musculus OX=10090 GN=Gapdh PE=1 SV=2	[R].VPTPNVSVVDLTCR.[L]	1xCarbamidomethyl [C13]; 1xOxidation [P4]; 1xTMT6plex [N-Term]	Q64467 1xOxidation [P342]; P16858 1xOxidation [P236]	0.000469326	0	2	7	6	Q64467; P16858	Q64467 [339-352]; P16858 [233-246]	0	1801.97	0	106.6	106.7	10.33	10.71	Shared	High	High	High	High	High	High	High	High	High	High	High	High	-1.65	-1.65	0	0.0002625	8.361e-05	0.003571	3.71	50	115.2	121.1	104	98.2	91.3	123.3	116.6	93.4	103.5	106.7
High	Glycerophosphocholine phosphodiesterase GPCPD1 OS=Mus musculus OX=10090 GN=Gpcpd1 PE=1 SV=1	[R].IYDWMPEQPNIFQVEQLER.[L]	1xOxidation [P/M]; 1xTMT6plex [N-Term]	Q8C0L9 1xOxidation [P]	7.5107e-06	0	1	3	2	Q8C0L9	Q8C0L9 [614-632]	0	2680.33	0	41.9	39.9	6.61	10.57		High	High	High	High	High	High	High	High	High	High	High	High	-0.76	-0.76	0	1.196e-05	8.146e-07	0.0001939	4.31	49	37	43.5	44.8	40.5	41	39.9	39.7	34.6	43.2	46
High	Glycogen [starch] synthase, muscle OS=Mus musculus OX=10090 GN=Gys1 PE=1 SV=2	[R].SNSVDTGPSSSLSTPTEPLSPTSSLGEER.[N]	1xDeamidated [N2]; 1xOxidation [P8]; 1xTMT6plex [N-Term]	Q9Z1E4 1xOxidation [P716]	0.00442137	0.000314697	1	1	1	Q9Z1E4	Q9Z1E4 [709-737]	0	3165.51	0	15.1	15.8	17.39	14.01		High	High	High	High	High	High	High	High	High	High	High	n/a	14.93		0.0001059		0.001025			53	12.1	19.6	13.1	15.7	16.2	13.4	17.3	14.9	19.3	15.8
High	Glycogen phosphorylase, brain form OS=Mus musculus OX=10090 GN=Pygb PE=1 SV=3	[R].EIWGVEPSDLQIPPPNLPKD.[-]	1xDeamidated [Q11]; 1xOxidation [P13]; 1xTMT6plex [K19]; 1xTMT6plex [N-Term]	Q8CI94 1xOxidation [P836]	0.00302256	0.000252531	1	1	3	Q8CI94	Q8CI94 [824-843]	1	2719.46	0	182.3	199.3	6.45	3.73		High	High	High	High	High	High	High	High	High	High	High	High	13.29	12.06	5.759e-05	0.00057	0.000666	0.008151	4.45	32	181.1	170.6	193.6	172.9	183.5	199.3	201.3	184.7	190.6	200.4
High	Glycogen phosphorylase, brain form OS=Mus musculus OX=10090 GN=Pygb PE=1 SV=3	[R].EIWGVEPSDLQIPPPNLPK.[D]	2xOxidation [P7; P13]; 1xTMT6plex [K19]; 1xTMT6plex [N-Term]	Q8CI94 2xOxidation [P830; P836]	0.037552	0.00218182	1	1	4	Q8CI94	Q8CI94 [824-842]	0	2619.44	0	35.2	39.4	8.19	9.16		High	High	High	High	High	High	High	High	High	High	High	High	1.03	1.03	0.0006409	0.001398	0.01122	0.02003	2.11	15	37.1	31.9	38.5	36	34.4	33.6	42.3	35.9	40.3	39.4
Medium	Glycogen phosphorylase, brain form OS=Mus musculus OX=10090 GN=Pygb PE=1 SV=3	[R].EIWGVEPSDLQIPPPNLPKD.[-]	2xOxidation [P7; P13]; 1xTMT6plex [K19]; 1xTMT6plex [N-Term]	Q8CI94 2xOxidation [P830; P836]	0.350877	0.0286273	1	1	4	Q8CI94	Q8CI94 [824-843]	1	2734.47	0	248.5	247.7	5.81	5.75		High	High	High	High	High	High	High	High	High	High	n/a	High		-0.34		0.009018		0.138	3.47		236.4	264.1	261.7	227.8	253.4	234.7	247.7	259.1	272.8	246.1
High	Glycogen phosphorylase, liver form OS=Mus musculus OX=10090 GN=Pygl PE=1 SV=4	[K].ARPEFMLPVHFYGR.[V]	1xOxidation [P3]; 1xTMT6plex [N-Term]	Q9ET01 1xOxidation [P195]	0.000520108	0	1	1	2	Q9ET01	Q9ET01 [193-206]	0	1965.04	0					No Quan Values	High	High	High	High	High	High	High	High	High	High	High	n/a	-0.67		0		9.438e-05			12
High	Glycogen phosphorylase, liver form OS=Mus musculus OX=10090 GN=Pygl PE=1 SV=4	[K].ARPEFMLPVHFYGR.[V]	2xOxidation [P3; M6]; 1xTMT6plex [N-Term]	Q9ET01 2xOxidation [P195; ]	0.000228519	0	1	1	2	Q9ET01	Q9ET01 [193-206]	0	1981.03	0					No Quan Values	High	High	High	High	High	High	High	High	High	High	High	n/a	-1.44		0		3.737e-05			36
High	Glycogen phosphorylase, muscle form OS=Mus musculus OX=10090 GN=Pygm PE=1 SV=3	[R].WLVLCNPGLAEVIAER.[I]	1xCarbamidomethyl [C5]; 1xOxidation [P7]; 1xTMT6plex [N-Term]	Q9WUB3 1xOxidation [P498]	5.99738e-05	0	1	2	2	Q9WUB3	Q9WUB3 [492-507]	0	2085.14	0	48.9	49.1	6.99	3.7		High	High	High	High	High	High	High	High	High	High	High	High	-0.88	-0.88	0	0	8.334e-06	4.508e-05	3.7	37	47.4	49.6	53.3	42.9	49.1	50	47.9	49.1	47	51.6
High	Glycogen phosphorylase, muscle form OS=Mus musculus OX=10090 GN=Pygm PE=1 SV=3	[K].VAIQLNDTHPSLAIPELMR.[I]	1xDeamidated [N6]; 1xOxidation [P15]; 1xTMT6plex [N-Term]	Q9WUB3 1xOxidation [P348]	0.00961886	0.000500778	1	2	1	Q9WUB3	Q9WUB3 [334-352]	0	2364.28	0					No Quan Values	High	High	High	High	High	High	High	High	High	High	n/a	High		1.86		0.0001156		0.001544	3.11
High	Glycogen phosphorylase, muscle form OS=Mus musculus OX=10090 GN=Pygm PE=1 SV=3	[K].VAIQLNDTHPSLAIPELMR.[I]	1xOxidation [P/M]; 1xTMT6plex [N-Term]	Q9WUB3 1xOxidation [P]	6.11435e-07	0	1	2	7	Q9WUB3	Q9WUB3 [334-352]	0	2363.3	0	227.3	237.5	10.06	8.21		High	High	High	High	High	High	High	High	High	High	High	High	0.32	1.23	0	0	4.933e-08	2.208e-06	4.79	54	216.9	230.1	273.8	206.4	236.6	240.7	201.7	221.1	249.4	237.5
High	Glyoxylate reductase/hydroxypyruvate reductase OS=Mus musculus OX=10090 GN=Grhpr PE=1 SV=1	[R].AALAQAADCEVEQWNSDDPIPR.[K]	1xCarbamidomethyl [C9]; 2xOxidation [P19; P21]; 1xTMT6plex [N-Term]	Q91Z53 2xOxidation [P39; P41]	1.9519e-07	0	1	2	2	Q91Z53	Q91Z53 [21-42]	0	2717.27	0	53.1	57.8	6.17	8.65		High	High	High	High	High	High	High	High	High	High	High	High	1.91	1.91	0	0	1.375e-08	6.23e-07	4.66	56	52.4	49.5	53.9	56.1	50.4	52.9	56.2	62.9	57.8	65.5
High	GTPase NRas OS=Mus musculus OX=10090 GN=Nras PE=1 SV=1	[KR].SYGIPFIETSAK.[T]	1xOxidation [P5]; 1xTMT6plex [K12]; 1xTMT6plex [N-Term]	P08556 1xOxidation [P140]	0.00885191	0.000463461	2	2	2	P08556	P08556 [136-147]	0	1787	0					No Quan Values	High	High	High	High	High	High	High	High	High	High	High	n/a	-0.91		0.0001709		0.002212			45
Medium	HBS1-like protein OS=Mus musculus OX=10090 GN=Hbs1l PE=1 SV=1	[R].LPPSDSGQSELLK.[S]	1xOxidation [P3]; 1xTMT6plex [K13]; 1xTMT6plex [N-Term]	L7N209 1xOxidation [P242]	0.429702	0.0379916	1	1	1	L7N209	L7N209 [240-252]	0	1845.04	0	38.6	40.1	49.04	74.53		Medium	Medium	Medium	Medium	Medium	Medium	Medium	Medium	Medium	Medium	n/a	Medium		1.82		0.01256		0.1844	1.22		20.5	75	53.1	24.6	47.6	113.8	15.6	40.1	43.1	37.6
Medium	Heat shock 70 kDa protein 12B OS=Mus musculus OX=10090 GN=Hspa12b PE=1 SV=1	[K].LLIALEPEAASVYCRK.[L]	1xCarbamidomethyl [C14]; 1xOxidation [P7]; 1xTMT6plex [K16]; 1xTMT6plex [N-Term]	Q9CZJ2 1xOxidation [P243]	0.385281	0.0322547	1	1	1	Q9CZJ2	Q9CZJ2 [237-252]	1	2307.31	0					No Quan Values	Medium	Medium	Medium	Medium	Medium	Medium	Medium	Medium	Medium	Medium	Medium	n/a	-7.1		0.01034		0.1594			3
High	Heat shock 70 kDa protein 1A OS=Mus musculus OX=10090 GN=Hspa1a PE=1 SV=2 Heat shock cognate 71 kDa protein OS=Mus musculus OX=10090 GN=Hspa8 PE=1 SV=1 Heat shock 70 kDa protein 1B OS=Mus musculus OX=10090 GN=Hspa1b PE=1 SV=3 Heat shock-related 70 kDa protein 2 OS=Mus musculus OX=10090 GN=Hspa2 PE=1 SV=2	[R].TTPSYVAFTDTER.[L]	1xOxidation [P3]; 1xTMT6plex [N-Term]	Q61696 1xOxidation [P39]; P63017 1xOxidation [P39]; P17879 1xOxidation [P39]; P17156 1xOxidation [P40]	0.00139752	0.000123263	4	7	2	Q61696; P63017; P17879; P17156	Q61696 [37-49]; P63017 [37-49]; P17879 [37-49]; P17156 [38-50]	0	1732.86	0	56.6	58.6	9.23	7.01	Shared	High	High	High	High	High	High	High	High	High	High	High	High	1.07	1.07	0.0001257	1.196e-05	0.001287	0.0001548	3.25	25	58.8	45	53.2	57.3	56.8	61.6	61.4	54.4	58.6	52.7
High	Heat shock cognate 71 kDa protein OS=Mus musculus OX=10090 GN=Hspa8 PE=1 SV=1	[K].LYQSAGGMPGGMPGGFPGGGAPPSGGASSGPTIEEVD.[-]	1xDeamidated [Q3]; 1xOxidation [P/M]; 1xTMT6plex [N-Term]	P63017 1xOxidation [P]	0.000248582	0	1	2	7	P63017	P63017 [610-646]	0	3592.64	0	118.3	126.1	5.59	5.32		High	High	High	High	High	High	High	High	High	High	High	High	13.92	4.24	0	9.562e-05	4.104e-05	0.001442	5.7	21	114.3	124	124	110.6	110.5	132.3	119.1	129.4	126.1	116.8
High	Heat shock protein beta-6 OS=Mus musculus OX=10090 GN=Hspb6 PE=1 SV=1	[R].LPPGVDPAAVTSALSPEGVLSIQATPASAQAQLPSPPAAK.[-]	5xOxidation [P16; P26; P34; P36; P37]; 1xTMT6plex [K40]; 1xTMT6plex [N-Term]	Q5EBG6 5xOxidation [P138; P148; P156; P158; P159]	0.000721088	0	1	1	1	Q5EBG6	Q5EBG6 [123-162]	0	4343.34	0	22.6	19.1	28.08	11.35		High	High	High	High	High	High	High	High	High	High	High	n/a	0.9		0		0.0001352			2	23.3	21.9	30.5	15.6	17.3	18.3	18.7	19.7	23.9	19.1
Medium	Hepatocyte growth factor-like protein OS=Mus musculus OX=10090 GN=Mst1 PE=2 SV=2	[K].AVCGPAGSQLVLLK.[L]	1xCarbamidomethyl [C3]; 1xOxidation [P5]; 1xTMT6plex [K14]; 1xTMT6plex [N-Term]	P26928 1xOxidation [P569]	0.306579	0.023488	1	2	3	P26928	P26928 [565-578]	0	1887.11	0	129.9	121.8	9.91	5.82		High	High	High	High	High	High	High	High	High	High	n/a	High		-3.04		0.007465		0.1149	1.42		110.6	106.9	132.7	131.6	135.7	116.4	129.2	121.8	112.8	127.8
High	Hepatoma-derived growth factor-related protein 3 OS=Mus musculus OX=10090 GN=Hdgfl3 PE=1 SV=2	[R].KGFNEGLWEIENNPGVK.[F]	1xDeamidated [N4]; 1xOxidation [P14]; 2xTMT6plex [K1; K17]; 1xTMT6plex [N-Term]	Q9JMG7 1xOxidation [P92]	0.00532172	0.000414721	1	1	1	Q9JMG7	Q9JMG7 [79-95]	1	2635.43	0					No Quan Values	High	High	High	High	High	High	High	High	High	High	High	n/a	14.54		0.0001242		0.00126			30
High	Heterogeneous nuclear ribonucleoprotein U OS=Mus musculus OX=10090 GN=Hnrnpu PE=1 SV=1	[R].LQAALDNEAGGRPAMEPGNGSLDLGGDAAGR.[S]	1xDeamidated [N19]; 1xOxidation [P/M]; 1xTMT6plex [N-Term]	Q8VEK3 1xOxidation [P]	1.10347e-10	0	1	2	8	Q8VEK3	Q8VEK3 [38-68]	0	3226.56	0	200.7	225.8	9.03	6.28		High	High	High	High	High	High	High	High	High	High	High	High	2.83	2.83	0	0	1.085e-11	4.825e-11	9.53	67	201.3	197.2	226.6	200.1	176.6	228	225.8	199.4	205.3	226.9
High	Histone H1.5 OS=Mus musculus OX=10090 GN=Hist1h1b PE=1 SV=2	[K].ATGPPVSELITK.[A]	1xOxidation [P4]; 1xTMT6plex [K12]; 1xTMT6plex [N-Term]	P43276 1xOxidation [P38]	0.00117092	7.4751e-05	1	1	3	P43276	P43276 [35-46]	0	1687	0					No Quan Values	High	High	High	High	High	High	High	High	High	High	High	High	-1.35	-0.27	1.127e-05	0.001248	0.000234	0.0184	2.46	27
High	Histone-lysine N-methyltransferase ASH1L OS=Mus musculus OX=10090 GN=Ash1l PE=1 SV=3	[R].AIQSLAGSQSASDKPSQR.[S]	1xDeamidated [Q3]; 1xOxidation [P15]; 1xTMT6plex [K14]; 1xTMT6plex [N-Term]	Q99MY8 1xOxidation [P1667]	0.0399435	0.00243254	1	1	2	Q99MY8	Q99MY8 [1653-1670]	0	2306.24	0					No Quan Values	High	High	High	High	High	High	High	High	High	High	High	High	1.8	1.8	0.001665	0.0005774	0.02484	0.008451	3.45	10
High	Homeobox protein Hox-D11 OS=Mus musculus OX=10090 GN=Hoxd11 PE=2 SV=2	[K].ATPGPEPK.[G]	1xOxidation [P5]; 1xTMT6plex [K8]; 1xTMT6plex [N-Term]	P23813 1xOxidation [P217]	0.13814	0.00987139	1	1	2	P23813	P23813 [213-220]	0	1270.74	0					No Quan Values	High	High	High	High	High	High	High	High	High	High	High	Low	7.21	-7.69	0.003014	0.7796	0.0484	1	1.07	3
Medium	Homeobox protein Nkx-2.4 OS=Mus musculus OX=10090 GN=Nkx2-4 PE=2 SV=2	[K].AAQQLQQEGGLGPPPPPPPPSPR.[R]	3xDeamidated [Q4; Q6; Q7]; 2xOxidation [P15; P16]; 1xTMT6plex [N-Term]	Q9EQM3 2xOxidation [P265; P266]	0.472061	0.0443654	1	1	1	Q9EQM3	Q9EQM3 [251-273]	0	2580.31	0					No Quan Values	Medium	Medium	Medium	Medium	Medium	Medium	Medium	Medium	Medium	Medium	Medium	n/a	8.05		0.01427		0.2			12
Medium	Homeobox protein NOBOX OS=Mus musculus OX=10090 GN=Nobox PE=1 SV=1	[R].ANLPLPLGPVQTPQVLPPMR.[D]	1xDeamidated [N2]; 3xOxidation [P9; P13; M19]; 1xTMT6plex [N-Term]	Q8VIH1 3xOxidation [P292; P296; P]	0.217952	0.0159539	1	2	2	Q8VIH1	Q8VIH1 [284-303]	0	2416.35	0	32.4	33.7	8.26	13.91		High	High	High	High	High	High	High	High	High	High	High	Medium	-6.39	-6.39	0.004852	0.0203	0.08268	0.2526	2.5	8	30.9	33.4	36.2	31.4	28.9	25.4	36.6	30.6	33.7	35.5
High	Hydroxyacyl-coenzyme A dehydrogenase, mitochondrial OS=Mus musculus OX=10090 GN=Hadh PE=1 SV=2	[K].FILDGWHEMEPENPLFQPSPSMNNLVAQK.[K]	1xDeamidated [N]; 3xOxidation [P11; P14; M/P]; 1xTMT6plex [K29]; 1xTMT6plex [N-Term]	Q61425 3xOxidation [P282; P285; P]	4.36303e-05	0	1	1	4	Q61425	Q61425 [272-300]	0	3875.9	0	102.9	93.2	8.82	12.91		High	High	High	High	High	High	High	High	High	High	High	High	1.28	1.28	0	0.0007124	6.633e-06	0.01069	5.24	25	99.4	97.1	108.8	106.6	117.9	81.7	89.9	93.2	112.3	106.4
High	Hydroxyacyl-coenzyme A dehydrogenase, mitochondrial OS=Mus musculus OX=10090 GN=Hadh PE=1 SV=2	[K].LGAGYPMGPFELLDYVGLDTTK.[F]	2xOxidation [P6; M7]; 1xTMT6plex [K22]; 1xTMT6plex [N-Term]	Q61425 2xOxidation [P255; ]	0.000152853	0	1	1	2	Q61425	Q61425 [250-271]	0	2847.49	0	21	14.6	16.39	27.79		High	High	High	High	High	High	High	High	High	High	High	High	4.19	4.19	0	0	2.399e-05	1.484e-05	4.49	55	21.1	19.5	21	25.6	26.5	14.6	13	15.7	19.3	8.5
High	Hydroxyacyl-coenzyme A dehydrogenase, mitochondrial OS=Mus musculus OX=10090 GN=Hadh PE=1 SV=2	[K].FILDGWHEMEPENPLFQPSPSMNNLVAQK.[K]	3xDeamidated [Q17; N23; N24]; 1xOxidation [P]; 1xTMT6plex [K29]; 1xTMT6plex [N-Term]	Q61425 1xOxidation [P]	0.00442137	0.000314697	1	1	2	Q61425	Q61425 [272-300]	0	3845.88	0					No Quan Values	High	High	High	High	High	High	High	High	High	High	High	High	9.7	9.7	0.0001933	4.502e-05	0.00324	0.0006102	5.47	23
High	Hydroxyacyl-coenzyme A dehydrogenase, mitochondrial OS=Mus musculus OX=10090 GN=Hadh PE=1 SV=2	[K].FILDGWHEMEPENPLFQPSPSMNNLVAQK.[K]	4xOxidation [P/M]; 1xTMT6plex [K29]; 1xTMT6plex [N-Term]	Q61425 4xOxidation [P]	0.000191319	0	1	1	10	Q61425	Q61425 [272-300]	0	3890.91	0	734.8	696.7	4.28	12.74		High	High	High	High	High	High	High	High	High	High	High	n/a	1.19		0		0.0001422			5	689.5	712.4	734.7	734.8	783.8	637.4	645.7	696.7	861.4	700.7
Medium	Immunoglobulin lambda constant 1 (Fragment) OS=Mus musculus OX=10090 GN=Iglc1 PE=4 SV=1	[K].VDGTPVTQGMETTQPSK.[Q]	2xDeamidated [Q8; Q14]; 2xOxidation [P5; M10]; 1xTMT6plex [K17]; 1xTMT6plex [N-Term]	A0A0G2JE99 2xOxidation [P48; ]	0.424595	0.0374702	1	2	1	A0A0G2JE99	A0A0G2JE99 [44-60]	0	2268.13	0	48.9	51.5	17.98	19.46		Medium	Medium	Medium	Medium	Medium	Medium	Medium	Medium	Medium	Medium	n/a	Medium		5.88		0.01229		0.1815	1.72		39	48.6	57.4	49.2	34.3	43.2	51.5	68.3	54.4	43.9
High	Immunoglobulin superfamily DCC subclass member 4 OS=Mus musculus OX=10090 GN=Igdcc4 PE=2 SV=1	[R].VLAAPAISQAPEALSR.[T]	1xDeamidated [Q9]; 2xOxidation [P5; P11]; 1xTMT6plex [N-Term]	Q9EQS9 2xOxidation [P334; P340]	0.117912	0.00851781	1	2	2	Q9EQS9	Q9EQS9 [330-345]	0	1856.03	0	79.3	86.2	3.31	8.91		High	High	High	High	High	High	High	High	High	High	High	High	-0.76	-0.76	0.002576	0.00474	0.04063	0.06736	2.99	15	77.5	83	83.2	77.5	78.1	81	83.4	100.8	86.2	91.8
Medium	Inactive tyrosine-protein kinase PRAG1 OS=Mus musculus OX=10090 GN=Prag1 PE=1 SV=3	[R].GLQKPASPLACTDGNSR.[C]	1xCarbamidomethyl [C11]; 2xDeamidated [Q3; N15]; 2xOxidation [P5; P8]; 1xTMT6plex [K4]; 1xTMT6plex [N-Term]	Q571I4 2xOxidation [P129; P132]	0.417016	0.0363399	1	1	1	Q571I4	Q571I4 [125-141]	0	2264.16	0	303.6	431	24.42	86.76		Medium	Medium	Medium	Medium	Medium	Medium	Medium	Medium	Medium	Medium	n/a	Medium		5.55		0.01186		0.1774	1.84		302.4	472.1	316.3	252.1	272.6	431	255.3	221.1	640	1515.5
High	Inorganic pyrophosphatase 2, mitochondrial OS=Mus musculus OX=10090 GN=Ppa2 PE=1 SV=1 Inorganic pyrophosphatase 2, mitochondrial OS=Mus musculus OX=10090 GN=Ppa2 PE=1 SV=1	[K].STDCCGDNDPIDVCEIGSK.[V]	3xCarbamidomethyl [C4; C5; C14]; 1xOxidation [P10]; 1xTMT6plex [K19]; 1xTMT6plex [N-Term]	Q91VM9 1xOxidation [P162]; D3Z636 1xOxidation [P162]	1.31721e-06	0	2	2	12	Q91VM9; D3Z636	Q91VM9 [153-171]; D3Z636 [153-171]	0	2616.16	0	500.4	526.5	4.72	5.53	Shared	High	High	High	High	High	High	High	High	High	High	High	High	-1.15	1.44	0	0	5.901e-06	2.447e-05	3.96	14	490.2	510.8	534.3	529.7	476.3	582.2	515.7	506.4	534.4	526.5
High	Inorganic pyrophosphatase OS=Mus musculus OX=10090 GN=Ppa1 PE=1 SV=1	[K].AIVDALPPPCESACSLPTDVDK.[W]	2xCarbamidomethyl [C10; C14]; 1xOxidation [P9]; 1xTMT6plex [K22]; 1xTMT6plex [N-Term]	Q9D819 1xOxidation [P269]	1.57318e-05	0	1	1	2	Q9D819	Q9D819 [261-282]	0	2829.44	0	57.4	50.8	7.73	7.59		High	High	High	High	High	High	High	High	High	High	High	High	-1.38	-1.38	0	1.196e-05	1.871e-06	0.0001539	3.44	27	49.3	56.9	61.3	58	52.4	57.6	46.8	50.8	52.1	50.3
High	Inorganic pyrophosphatase OS=Mus musculus OX=10090 GN=Ppa1 PE=1 SV=1	[K].HTGCCGDNDPIDVCEIGSK.[V]	3xCarbamidomethyl [C4; C5; C14]; 1xOxidation [P10]; 1xTMT6plex [K19]; 1xTMT6plex [N-Term]	Q9D819 1xOxidation [P119]	7.86695e-05	0	1	1	2	Q9D819	Q9D819 [110-128]	0	2608.18	0	89.9	84.3	10.22	7.8		High	High	High	High	High	High	High	High	High	High	High	High	0.28	0.28	0	1.196e-05	1.13e-05	8.909e-05	3.81	33	106.3	79.9	87.9	92.3	83.3	98.3	89.4	81.4	84.3	83.2
Medium	Integrin alpha-D OS=Mus musculus OX=10090 GN=Itgad PE=1 SV=1	[R].EPTALQELNTIGSAPSQDHVFKVGNFVALR.[S]	2xDeamidated [Q6; N9]; 1xOxidation [P15]; 1xTMT6plex [K22]; 1xTMT6plex [N-Term]	Q3V0T4 1xOxidation [P316]	0.480296	0.0454933	1	1	1	Q3V0T4	Q3V0T4 [302-331]	1	3714.97	0					No Quan Values	Medium	Medium	Medium	Medium	Medium	Medium	Medium	Medium	Medium	Medium	Medium	n/a	3.02		0.01463		0.2037			3
Medium	Inter-alpha-trypsin inhibitor heavy chain H3 OS=Mus musculus OX=10090 GN=Itih3 PE=1 SV=3	[K].TAFITNFTLTIDGVTYPGNVK.[E]	2xDeamidated [N6; N19]; 1xOxidation [P17]; 1xTMT6plex [K21]; 1xTMT6plex [N-Term]	Q61704 1xOxidation [P102]	0.283211	0.0215678	1	2	1	Q61704	Q61704 [86-106]	0	2748.47	0					No Quan Values	High	High	High	High	High	High	High	High	High	High	n/a	High		1.21		0.006815		0.1025	2.24
Medium	Interferon regulatory factor 2-binding protein 1 OS=Mus musculus OX=10090 GN=Irf2bp1 PE=1 SV=2	[K].DLASTGSQGSQLPPPQAQAQPSGTGGSVSGPDR.[Y]	2xDeamidated [Q18; Q20]; 2xOxidation [P13; P14]; 1xTMT6plex [N-Term]	Q8R3Y8 2xOxidation [P91; P92]	0.49703	0.047766	1	2	1	Q8R3Y8	Q8R3Y8 [79-111]	0	3398.61	0	46.8	49.3	8.36	5.82		Medium	Medium	Medium	Medium	Medium	Medium	Medium	Medium	Medium	Medium	n/a	Medium		2.32		0.01728		0.226	3.46		47.4	45.4	54.3	46.2	43	46.2	52.8	49.3	53	48.6
Medium	Interleukin enhancer-binding factor 2 OS=Mus musculus OX=10090 GN=Ilf2 PE=1 SV=1	[K].ILITTVPPNLRK.[L]	1xOxidation [P8]; 1xTMT6plex [K12]; 1xTMT6plex [N-Term]	Q9CXY6 1xOxidation [P182]	0.357571	0.0292715	1	1	1	Q9CXY6	Q9CXY6 [175-186]	1	1839.18	0					No Quan Values	High	High	High	High	High	High	High	High	High	High	n/a	High		-4.84		0.009269		0.1421	0.89
Medium	Interleukin-23 subunit alpha OS=Mus musculus OX=10090 GN=Il23a PE=1 SV=1	[R].ETQQMPSLSSSQQWQRPLLR.[S]	2xDeamidated [Q13; Q15]; 1xOxidation [P17]; 1xTMT6plex [N-Term]	Q9EQ14 1xOxidation [P160]	0.20433	0.0148458	1	1	1	Q9EQ14	Q9EQ14 [144-163]	0	2647.33	0	128.3	112.7	29.6	18.49		High	High	High	High	High	High	High	High	High	High	n/a	High		-0.12		0.004597		0.06546	2.53		83.6	183	125.9	196.5	130.2	109.5	107.1	112.7	161.9	121.8
High	Involucrin OS=Mus musculus OX=10090 GN=Ivl PE=1 SV=1	[K].ELSDQPLDQALVK.[K]	1xDeamidated [Q9]; 1xOxidation [P6]; 1xTMT6plex [K13]; 1xTMT6plex [N-Term]	P48997 1xOxidation [P440]	0.0743327	0.00531834	1	2	1	P48997	P48997 [435-447]	0	1931.07	0	34.1	36.2	21.95	43.27		High	High	High	High	High	High	High	High	High	High	High	Low	11.46	-4.45	0.001599	0.3086	0.02414	1	1.52	12	24.3	45.3	37	27.4	34.3	70.6	25	36.2	43.1	30.7
Medium	Iodotyrosine deiodinase 1 OS=Mus musculus OX=10090 GN=Iyd PE=1 SV=1	[R].VLLGRPSHEK.[L]	1xOxidation [P6]; 1xTMT6plex [K10]; 1xTMT6plex [N-Term]	Q9DCX8 1xOxidation [P250]	0.171207	0.0123343	1	1	12	Q9DCX8	Q9DCX8 [245-254]	0	1609.98	0	1213.1	1166.2	7.85	4.81		High	High	High	High	High	High	High	High	High	High	High	High	-0.49	-0.49	0.003661	0.009148	0.06216	0.1404	1.14	1	1255.9	1032.1	1235.8	1120.5	1190.8	1087.3	1188.4	1228.5	1119.9	1166.2
Medium	IQ motif-containing GTPase-activating protein 3 OS=Mus musculus OX=10090 GN=Iqgap3 PE=1 SV=1	[R].LGLAPQIHDLYGK.[V]	1xOxidation [P5]; 1xTMT6plex [K13]; 1xTMT6plex [N-Term]	F8VQ29 1xOxidation [P156]	0.417016	0.0363399	1	2	1	F8VQ29	F8VQ29 [152-164]	0	1899.11	0					No Quan Values	Medium	Medium	Medium	Medium	Medium	Medium	Medium	Medium	Medium	Medium	n/a	Medium		-1.64		0.01168		0.176	2.09
Medium	Isochorismatase domain-containing protein 2A OS=Mus musculus OX=10090 GN=Isoc2a PE=1 SV=1	[K].EPVPDSGLLSLFQGQSPLTSC.[-]	1xCarbamidomethyl [C21]; 1xDeamidated [Q15]; 1xOxidation [P17]; 1xTMT6plex [N-Term]	P85094 1xOxidation [P202]	0.221071	0.0162292	1	1	2	P85094	P85094 [186-206]	0	2478.23	0	17.4	19.6	5.67	19.18		High	High	High	High	High	High	High	High	High	High	High	Medium	13.28	13.28	0.004956	0.01507	0.08402	0.206	2.87	22	17.9	17.3	17.3	15.3	18.1	19.6	18.9	15.7	23	25.9
High	Isochorismatase domain-containing protein 2A OS=Mus musculus OX=10090 GN=Isoc2a PE=1 SV=1	[K].EPVPDSGLLSLFQGQSPLTSC.[-]	1xCarbamidomethyl [C21]; 1xOxidation [P17]; 1xTMT6plex [N-Term]	P85094 1xOxidation [P202]	0.0163941	0.000783181	1	1	2	P85094	P85094 [186-206]	0	2477.24	0	6.9	8	33.58	32.65		High	High	High	High	High	High	High	High	High	High	High	High	0.92	0.92	0.0002398	0.0006199	0.004431	0.009135	2.47	25	9	5.7	10.5	8.4	4.4	6.6	3.5	8.3	8	9.8
High	Isochorismatase domain-containing protein 2A OS=Mus musculus OX=10090 GN=Isoc2a PE=1 SV=1	[K].IIKEPVPDSGLLSLFQGQSPLTSC.[-]	1xCarbamidomethyl [C24]; 1xDeamidated [Q18]; 1xOxidation [P20]; 1xTMT6plex [K3]; 1xTMT6plex [N-Term]	P85094 1xOxidation [P202]	0.0240185	0.00107996	1	1	1	P85094	P85094 [183-206]	1	3061.65	0	30.2	33.5	11.74	6.49		High	High	High	High	High	High	High	High	High	High	n/a	High		12.82		0.0003325		0.004606	2.67		28.2	36.3	31.1	31	29.3	36.1	30.2	33.5	34.1	32.9
High	Isochorismatase domain-containing protein 2A OS=Mus musculus OX=10090 GN=Isoc2a PE=1 SV=1	[K].IIKEPVPDSGLLSLFQGQSPLTSC.[-]	1xCarbamidomethyl [C24]; 1xOxidation [P20]; 1xTMT6plex [K3]; 1xTMT6plex [N-Term]	P85094 1xOxidation [P202]	6.34759e-07	0	1	1	4	P85094	P85094 [183-206]	1	3060.67	0	73.1	63.3	15.42	18.51		High	High	High	High	High	High	High	High	High	High	High	High	0.21	0.87	0	0	1.623e-05	1.531e-07	5.66	15	74.1	55.5	72.3	55.4	73.9	58.8	58.8	71.1	88.8	63.3
High	Isocitrate dehydrogenase [NADP], mitochondrial OS=Mus musculus OX=10090 GN=Idh2 PE=1 SV=3	[R].LVPGWTKPITIGR.[H]	1xOxidation [P]; 1xTMT6plex [K7]; 1xTMT6plex [N-Term]	P54071 1xOxidation [P]	0.0110457	0.000551893	1	3	4	P54071	P54071 [160-172]	0	1912.18	0	364	366.1	4.5	20.64		High	High	High	High	High	High	High	High	High	High	High	High	-1.56	-1.56	0.0002513	0.0001448	0.005061	0.001818	4.11	3	379.5	359.6	396.8	354.7	368.4	301	366.1	396.9	514.1	351.1
High	Isocitrate dehydrogenase [NADP], mitochondrial OS=Mus musculus OX=10090 GN=Idh2 PE=1 SV=3	[R].LVPGWTKPITIGR.[H]	2xOxidation [P3; P8]; 1xTMT6plex [K7]; 1xTMT6plex [N-Term]	P54071 2xOxidation [P162; P167]	0.0864303	0.00625058	1	3	1	P54071	P54071 [160-172]	0	1928.17	0					No Quan Values	High	High	High	High	High	High	High	High	High	High	n/a	High		1.18		0.001544		0.02179	2.09
High	Isoform 2 of Dynamin-like 120 kDa protein, mitochondrial OS=Mus musculus OX=10090 GN=Opa1	[R].MVLVDLPGVINTVTSGMAPDTK.[E]	1xOxidation [P/M]; 1xTMT6plex [K22]; 1xTMT6plex [N-Term]	P58281-2 1xOxidation [P]	6.05973e-09	0	1	4	11	P58281-2	P58281-2 [431-452]	0	2732.5	0	375.5	392.3	7.24	5.65		High	High	High	High	High	High	High	High	High	High	High	High	-0.86	0.39	0	0	9.254e-07	4.4e-07	5.93	41	341.1	363.1	394	351.1	388.4	371.9	392.3	370.3	424	399.6
Medium	Isoform 2 of E3 ubiquitin-protein ligase TRIM11 OS=Mus musculus OX=10090 GN=Trim11	[K].LQPPAVVPMELR.[T]	2xOxidation [P3; P4]; 1xTMT6plex [N-Term]	Q99PQ2-2 2xOxidation [P276; P277]	0.49703	0.047766	1	2	1	Q99PQ2-2	Q99PQ2-2 [274-285]	0	1610.91	0					No Quan Values	Medium	Medium	Medium	Medium	Medium	Medium	Medium	Medium	Medium	Medium	n/a	Medium		1.23		0.01725		0.2259	1.42
Medium	Isoform 2 of Metallophosphoesterase 1 OS=Mus musculus OX=10090 GN=Mppe1	[R].LVLSGHTHSACEVLHPGGAPEVSVPSFSWR.[N]	1xCarbamidomethyl [C11]; 1xOxidation [P25]; 1xTMT6plex [N-Term]	Q80XL7-2 1xOxidation [P323]	0.210301	0.015292	1	2	1	Q80XL7-2	Q80XL7-2 [299-328]	0	3458.75	0					No Quan Values	High	High	High	High	High	High	High	High	High	High	n/a	High		10.96		0.004773		0.06777	1.25
Medium	Isoform 2 of Sarcoplasmic/endoplasmic reticulum calcium ATPase 2 OS=Mus musculus OX=10090 GN=Atp2a2	[R].NYLEQPAILE.[-]	1xOxidation [P6]; 1xTMT6plex [N-Term]	O55143-2 1xOxidation [P994]	0.445274	0.0405564	1	1	1	O55143-2	O55143-2 [989-998]	0	1434.77	0					No Quan Values	Medium	Medium	Medium	Medium	Medium	Medium	Medium	Medium	Medium	Medium	n/a	Medium		1.1		0.01356		0.1932	1.28
High	Isoform 2 of Sarcoplasmic/endoplasmic reticulum calcium ATPase 2 OS=Mus musculus OX=10090 GN=Atp2a2 Sarcoplasmic/endoplasmic reticulum calcium ATPase 2 OS=Mus musculus OX=10090 GN=Atp2a2 PE=1 SV=2	[K].YETNLTFVGCVGMLDPPR.[I]	1xCarbamidomethyl [C10]; 2xOxidation [P16; P/M]; 1xTMT6plex [N-Term]	O55143-2 2xOxidation [P601; P]; O55143 2xOxidation [P601; P]	0.00283239	0.000252531	2	2	8	O55143-2; O55143	O55143-2 [586-603]; O55143 [586-603]	0	2330.14	0	16.4	13.6	23.99	18.69	Shared	High	High	High	High	High	High	High	High	High	High	High	High	0.39	0.39	5.759e-05	2.892e-05	0.0006225	0.0004837	2.78	25	17.2	20.4	13	15.7	18.1	14	13.6	13.2	15.3	8.9
High	Isoform 2 of Sarcoplasmic/endoplasmic reticulum calcium ATPase 2 OS=Mus musculus OX=10090 GN=Atp2a2 Sarcoplasmic/endoplasmic reticulum calcium ATPase 2 OS=Mus musculus OX=10090 GN=Atp2a2 PE=1 SV=2	[K].VEGDTCSLNEFSITGSTYAPIGEVQK.[D]	1xCarbamidomethyl [C6]; 1xDeamidated [N/Q]; 1xOxidation [P20]; 1xTMT6plex [K26]; 1xTMT6plex [N-Term]	O55143-2 1xOxidation [P391]; O55143 1xOxidation [P391]	3.05947e-08	0	2	2	10	O55143-2; O55143	O55143-2 [372-397]; O55143 [372-397]	0	3277.62	0	425.1	453.6	5.92	7.79	Shared	High	High	High	High	High	High	High	High	High	High	High	High	4.45	4.45	0	0	3.096e-09	1.979e-05	6.47	33	418.9	462.4	414.2	436	386.9	457	468.7	453.6	416.8	386.6
High	Isoform 2 of Sarcoplasmic/endoplasmic reticulum calcium ATPase 2 OS=Mus musculus OX=10090 GN=Atp2a2 Sarcoplasmic/endoplasmic reticulum calcium ATPase 2 OS=Mus musculus OX=10090 GN=Atp2a2 PE=1 SV=2	[K].VEGDTCSLNEFSITGSTYAPIGEVQK.[D]	1xCarbamidomethyl [C6]; 1xOxidation [P20]; 1xTMT6plex [K26]; 1xTMT6plex [N-Term]	O55143-2 1xOxidation [P391]; O55143 1xOxidation [P391]	4.66185e-08	0	2	2	33	O55143-2; O55143	O55143-2 [372-397]; O55143 [372-397]	0	3276.63	0	1634	1676.5	3.69	4.4	Shared	High	High	High	High	High	High	High	High	High	High	High	High	-1.99	-1.99	0	0	2.755e-09	4.554e-07	6.87	33	1529.5	1678	1647.2	1674.1	1568.4	1770	1709.5	1676.5	1645.1	1572.2
High	Isoform 2 of Sarcoplasmic/endoplasmic reticulum calcium ATPase 2 OS=Mus musculus OX=10090 GN=Atp2a2 Sarcoplasmic/endoplasmic reticulum calcium ATPase 2 OS=Mus musculus OX=10090 GN=Atp2a2 PE=1 SV=2	[K].DIVPGDIVEIAVGDK.[V]	1xOxidation [P4]; 1xTMT6plex [K15]; 1xTMT6plex [N-Term]	O55143-2 1xOxidation [P147]; O55143 1xOxidation [P147]	0.0385599	0.00229044	2	2	4	O55143-2; O55143	O55143-2 [144-158]; O55143 [144-158]	0	2014.15	0	93.6	95	29.63	49.2	Shared	High	High	High	High	High	High	High	High	High	High	High	High	-2.01	-0.88	0.002146	0.003325	0.03292	0.0437	3.14	3	71.9	142	106.4	65.9	109.3	203.4	65.6	101.9	95	83.4
Medium	Isoform 2 of Sarcoplasmic/endoplasmic reticulum calcium ATPase 2 OS=Mus musculus OX=10090 GN=Atp2a2 Sarcoplasmic/endoplasmic reticulum calcium ATPase 2 OS=Mus musculus OX=10090 GN=Atp2a2 PE=1 SV=2	[K].ISLPVILMDETLK.[F]	2xOxidation [P4; M8]; 1xTMT6plex [K13]; 1xTMT6plex [N-Term]	O55143-2 2xOxidation [P975; ]; O55143 2xOxidation [P975; ]	0.163631	0.0117202	2	2	2	O55143-2; O55143	O55143-2 [972-984]; O55143 [972-984]	0	1962.16	0	47.4	52.1	11.93	5.91	Shared	High	High	High	High	High	High	High	High	High	High	High	High	-1.34	-1.34	0.003507	0.004292	0.05925	0.06011	2.29	5	47.1	56.6	53.9	41.7	47.6	50.1	52.1	54.1	49.5	57.1
High	Isoform 2 of Sarcoplasmic/endoplasmic reticulum calcium ATPase 2 OS=Mus musculus OX=10090 GN=Atp2a2 Sarcoplasmic/endoplasmic reticulum calcium ATPase 3 OS=Mus musculus OX=10090 GN=Atp2a3 PE=1 SV=3 Sarcoplasmic/endoplasmic reticulum calcium ATPase 2 OS=Mus musculus OX=10090 GN=Atp2a2 PE=1 SV=2	[R].SLPSVETLGCTSVICSDK.[T]	2xCarbamidomethyl [C10; C15]; 1xOxidation [P3]; 1xTMT6plex [K18]; 1xTMT6plex [N-Term]	O55143-2 1xOxidation [P337]; Q64518 1xOxidation [P337]; O55143 1xOxidation [P337]	0.00341014	0.000252531	3	9	29	O55143-2; Q64518; O55143	O55143-2 [335-352]; Q64518 [335-352]; O55143 [335-352]	0	2427.25	0	1764.1	1856.8	5.09	2.9	Shared	High	High	High	High	High	High	High	High	High	High	High	High	0.7	9.44	6.197e-05	0.007549	0.000765	0.1163	3.83	19	1624.6	1748.1	1866.8	1780.2	1714.2	1856.8	1902.9	1821.6	1764.6	1876.1
Medium	Isoform 3 of Rab GTPase-activating protein 1-like OS=Mus musculus OX=10090 GN=Rabgap1l	[K].TATGTQPLQPPQAPQPPK.[E]	2xDeamidated [Q12; Q15]; 1xOxidation [P11]; 1xTMT6plex [K18]; 1xTMT6plex [N-Term]	A6H6A9-3 1xOxidation [P360]	0.378212	0.0315764	1	1	1	A6H6A9-3	A6H6A9-3 [350-367]	0	2333.28	0	38.1	35.6	13	8.21		Medium	Medium	Medium	Medium	Medium	Medium	Medium	Medium	Medium	Medium	n/a	Medium		-2.75		0.01012		0.1543	1.59		42.8	34.6	37.9	31	44.2	36.1	35.6	32.2	31.3	38.1
High	Isoform 3 of U2 snRNP-associated SURP motif-containing protein OS=Mus musculus OX=10090 GN=U2surp	[R].SSDVHSSGSSDAHPLLENK.[L]	1xOxidation [P14]; 1xTMT6plex [K19]; 1xTMT6plex [N-Term]	Q6NV83-3 1xOxidation [P31]	0.0362468	0.00213126	1	1	1	Q6NV83-3	Q6NV83-3 [18-36]	0	2441.23	0	274	307.8	6.18	3.54		High	High	High	High	High	High	High	High	High	High	n/a	High		-1.9		0.0005132		0.007533	2.93		293.9	268.7	292.5	248	276.7	320.8	307.8	305.6	299.6	326.1
Medium	Isoform 5 of Dystonin OS=Mus musculus OX=10090 GN=Dst Dystonin OS=Mus musculus OX=10090 GN=Dst PE=1 SV=2	[K].AVQEIAEQLLLENHPAR.[L]	1xDeamidated [Q3]; 1xOxidation [P15]; 1xTMT6plex [N-Term]	Q91ZU6-5 1xOxidation [P445]; Q91ZU6 1xOxidation [P771]	0.417016	0.0363399	2	10	2	Q91ZU6-5; Q91ZU6	Q91ZU6-5 [431-447]; Q91ZU6 [757-773]	0	2177.18	0					No Quan Values	Medium	Medium	Medium	Medium	Medium	Medium	Medium	Medium	Medium	Medium	Medium	Medium	-0.15	-0.15	0.01173	0.02123	0.1743	0.2606	2.52	13
High	Isoform Cytoplasmic+peroxisomal of Peroxiredoxin-5, mitochondrial OS=Mus musculus OX=10090 GN=Prdx5	[-].MAPIKVGDAIPSVEVFEGEPGKK.[V]	1xAcetyl [N-Term]; 2xOxidation [P3; P11]; 3xTMT6plex [K5; K22; K23]; 1xTMT6plex [N-Term]	P99029-2 1xAcetyl [N-Term]; 2xOxidation [P3; P11]	0.0337637	0.00197221	1	1	1	P99029-2	P99029-2 [1-23]	2	3388.92	0					No Quan Values	High	High	High	High	High	High	High	High	High	High	n/a	High		-4.32		0.0004956		0.006901	3.95
High	Isoform Cytoplasmic+peroxisomal of Peroxiredoxin-5, mitochondrial OS=Mus musculus OX=10090 GN=Prdx5	[K].ALNVEPDGTGLTCSLAPNILSQL.[-]	1xCarbamidomethyl [C13]; 1xDeamidated [Q/N]; 1xOxidation [P17]; 1xTMT6plex [N-Term]	P99029-2 1xOxidation [P156]	0.0115663	0.000551893	1	4	2	P99029-2	P99029-2 [140-162]	0	2629.36	0	3	3.8	13.4	23.05		Not Found	Not Found	High	High	Not Found	High	High	Not Found	High	High	High	High	9.34	9.34	0.0003101	0.0001448	0.006179	0.001913	3.02	52			2.4	3		3.8	2.3		3.9	4.1
High	Isoform Cytoplasmic+peroxisomal of Peroxiredoxin-5, mitochondrial OS=Mus musculus OX=10090 GN=Prdx5	[K].ALNVEPDGTGLTCSLAPNILSQL.[-]	1xCarbamidomethyl [C13]; 1xOxidation [P17]; 1xTMT6plex [N-Term]	P99029-2 1xOxidation [P156]	0.000447909	0	1	4	8	P99029-2	P99029-2 [140-162]	0	2628.38	0	9.7	10.1	32.32	28.45		High	High	High	High	High	High	High	High	High	High	High	High	0.31	0.31	0	0	9.654e-05	4.014e-05	2.94	32	9.8	9.5	16.9	9.7	6.6	8.1	12	13.9	10.1	6.7
High	Isoform Cytoplasmic+peroxisomal of Peroxiredoxin-5, mitochondrial OS=Mus musculus OX=10090 GN=Prdx5	[K].GVLFGVPGAFTPGCSK.[TV]	1xCarbamidomethyl [C14]; 1xOxidation [P12]; 1xTMT6plex [K16]; 1xTMT6plex [N-Term]	P99029-2 1xOxidation [P46]	5.61713e-05	0	1	4	7	P99029-2	P99029-2 [35-50]	0	2068.13	0	549.5	534.4	8.34	15.48		High	High	High	High	High	High	High	High	High	High	High	High	1.51	-1.11	0	0.0004956	7.742e-06	0.007269	4.05	15	526.1	638.8	586.2	514.6	567.6	709.1	493.9	568.2	534.4	505.4
High	Junction plakoglobin OS=Mus musculus OX=10090 GN=Jup PE=1 SV=3	[R].LAEPSQLLK.[S]	1xDeamidated [Q6]; 1xOxidation [P4]; 1xTMT6plex [K9]; 1xTMT6plex [N-Term]	Q02257 1xOxidation [P119]	0.100274	0.00728253	1	1	4	Q02257	Q02257 [116-124]	0	1473.89	0	495.3	514.7	11.49	9.44		High	High	High	High	High	High	High	High	High	High	High	High	-0.63	-0.63	0.002205	0.002454	0.03384	0.03212	3.28	12	429	591.6	487	563.8	503.3	514.7	465.9	491.7	594.6	539.1
High	Kallikrein-1 OS=Mus musculus OX=10090 GN=Klk1 PE=1 SV=3	[K].LGSTCLASGWGSITPVK.[Y]	1xCarbamidomethyl [C5]; 1xOxidation [P15]; 1xTMT6plex [K17]; 1xTMT6plex [N-Term]	P15947 1xOxidation [P162]	0.0822126	0.0059672	1	2	1	P15947	P15947 [148-164]	0	2208.21	0	62.2	56.6	13.26	22.08		High	High	High	High	High	High	High	High	High	High	Low	High	2.53	-0.32	0.4028	0.001441	1	0.02048	1.71	1	52.9	68.3	65.7	48.4	65.4	85.3	51.4	67.3	56.6	54.1
Medium	Kelch-like protein 7 OS=Mus musculus OX=10090 GN=Klhl7 PE=2 SV=1	[R].IALFGGSQPQSCR.[Y]	1xCarbamidomethyl [C12]; 1xOxidation [P9]; 1xTMT6plex [N-Term]	Q8BUL5 1xOxidation [P303]	0.255905	0.0191778	1	1	8	Q8BUL5	Q8BUL5 [295-307]	0	1665.86	0	327.4	322.5	6.04	2.25		High	High	High	High	High	Medium	High	High	Medium	High	High	Low	12.3	14.64	0.005981	0.3561	0.09982	1	2.8	17	302.5	342.4	332.2	295.1	338.5	329.7	312.8	325.8	314.8	322.5
High	KH domain-containing, RNA-binding, signal transduction-associated protein 1 OS=Mus musculus OX=10090 GN=Khdrbs1 PE=1 SV=2	[R].ASPATQPPPLLPPSTPGPDATVVGSAPTPLLPPSATAAVK.[M]	5xOxidation [P9; P12; P13; P16; P18]; 1xTMT6plex [K40]; 1xTMT6plex [N-Term]	Q60749 5xOxidation [P65; P68; P69; P72; P74]	0.00014724	0	1	1	1	Q60749	Q60749 [57-96]	0	4307.34	0	13	11.6	18.47	24.51		High	High	High	High	High	High	High	High	High	High	High	n/a	-0.65		0		2.28e-05			12	9.7	12.8	11.3	15.6	13.3	11.2	9.4	15.6	16.9	11.6
High	Lactoylglutathione lyase OS=Mus musculus OX=10090 GN=Glo1 PE=1 SV=3	[R].GFGHIGIAVPDVYSACK.[R]	1xCarbamidomethyl [C16]; 1xOxidation [P10]; 1xTMT6plex [K17]; 1xTMT6plex [N-Term]	Q9CPU0 1xOxidation [P133]	0.0182929	0.000837948	1	1	2	Q9CPU0	Q9CPU0 [124-140]	0	2265.21	0	110	134.9	7.49	6.39		High	High	High	High	High	High	High	High	High	High	High	High	0.95	0.95	0.0002469	0.0003884	0.00498	0.005632	4.12	11	112.3	103.1	107.6	115.6	98	128.7	145.5	143	125.6	134.9
High	Lactoylglutathione lyase OS=Mus musculus OX=10090 GN=Glo1 PE=1 SV=3	[K].GLAFIQDPDGYWIEILNPNK.[I]	1xOxidation [P]; 1xTMT6plex [K20]; 1xTMT6plex [N-Term]	Q9CPU0 1xOxidation [P]	0.011148	0.000551893	1	1	2	Q9CPU0	Q9CPU0 [160-179]	0	2777.49	0	14.9	16.3	18.79	9.56		High	High	High	High	High	High	High	High	High	High	High	High	1.19	1.19	0.002419	0.0001448	0.03791	0.001831	2.58	25	16.7	15.2	13.7	16.1	9.2	17.7	14.3	15.1	17.8	16.3
High	Lactoylglutathione lyase OS=Mus musculus OX=10090 GN=Glo1 PE=1 SV=3	[K].GLAFIQDPDGYWIEILNPNK.[I]	2xOxidation [P8; P18]; 1xTMT6plex [K20]; 1xTMT6plex [N-Term]	Q9CPU0 2xOxidation [P167; P177]	0.00498753	0.000355608	1	1	2	Q9CPU0	Q9CPU0 [160-179]	0	2793.49	0	51	92.4	9.27	6.77		High	High	High	High	High	High	High	High	High	High	High	High	1.56	1.56	0.000115	0.0006569	0.001163	0.009911	2.7	12	52.5	49.5	52.6	40.4	50.8	92.4	85.4	94.1	85.7	100.2
High	Latent-transforming growth factor beta-binding protein 4 OS=Mus musculus OX=10090 GN=Ltbp4 PE=1 SV=2	[R].APAGTFPGSQPQAPASPSLPARPPAPPPPR.[R]	1xOxidation [P]; 1xTMT6plex [N-Term]	Q8K4G1 1xOxidation [P]	1.98878e-07	0	1	5	2	Q8K4G1	Q8K4G1 [1179-1208]	0	3159.69	0	42.5	46.4	12.65	7.67		High	High	High	High	High	High	High	High	High	High	High	High	-0.25	-0.25	0	0	3.977e-08	4.25e-09	7.4	41	43.2	41.9	50	39.4	37.1	44.4	46.4	50.9	41.3	46.5
Medium	Lecithin retinol acyltransferase OS=Mus musculus OX=10090 GN=Lrat PE=1 SV=1	[R].ISPQAEK.[F]	1xOxidation [P3]; 1xTMT6plex [K7]; 1xTMT6plex [N-Term]	Q9JI60 1xOxidation [P176]	0.240503	0.0179547	1	1	2	Q9JI60	Q9JI60 [174-180]	0	1246.74	0	430.7	393.4	28.4	32.82		High	High	High	High	High	High	High	High	High	High	High	High	-0.42	-0.42	0.005504	0.008836	0.09302	0.1355	2.35	12	521.3	355.9	563.1	336	331.7	391.7	328.3	475.7	714.6	393.4
High	Leucine-rich PPR motif-containing protein, mitochondrial OS=Mus musculus OX=10090 GN=Lrpprc PE=1 SV=2	[K].TSNQEVPFDVPELWFGDDRPSLSPSSR.[S]	2xOxidation [P]; 1xTMT6plex [N-Term]	Q6PB66 2xOxidation [P]	4.57202e-05	0	1	1	4	Q6PB66	Q6PB66 [1001-1027]	0	3323.6	0	76.7	81.5	17.31	9.84		High	High	High	High	High	High	High	High	High	High	High	High	1.59	4.18	0	0	6.669e-05	2.697e-06	5.68	15	64.7	104.9	77.7	84.4	72.1	81.5	69	77.8	89.6	85.9
Medium	Leucine-rich repeat and IQ domain-containing protein 4 OS=Mus musculus OX=10090 GN=Lrriq4 PE=2 SV=1	[R].QLPPSISLLSNLK.[I]	1xDeamidated [Q1]; 2xOxidation [P3; P4]; 1xTMT6plex [K13]; 1xTMT6plex [N-Term]	A6H6A4 2xOxidation [P378; P379]	0.463917	0.043321	1	1	1	A6H6A4	A6H6A4 [376-388]	0	1901.14	0	48.9	51.4	20.18	13.12		Medium	Medium	Medium	Medium	Medium	Medium	Medium	Medium	Medium	Medium	Medium	n/a	-0.35		0.01377		0.1951			10	49.1	48.6	63.6	38.6	39.9	53.8	47.3	47.7	64.4	51.4
Medium	Leucine-rich repeat and WD repeat-containing protein 1 OS=Mus musculus OX=10090 GN=LRWD1 PE=2 SV=1	[K].IQSLNLSGLQLLSEHLDPNLLGR.[L]	2xDeamidated [N5; N19]; 1xOxidation [P18]; 1xTMT6plex [N-Term]	Q8BUI3 1xOxidation [P40]	0.318787	0.0245019	1	1	1	Q8BUI3	Q8BUI3 [23-45]	0	2777.52	0	99	88.8	17.07	13.71		High	High	High	High	High	High	High	High	High	High	n/a	High		-1.14		0.007884		0.1213	1.84		102.1	127.9	102.4	86	79.2	104.9	87.5	88.8	110.3	79.4
Medium	Leucine-rich repeat serine/threonine-protein kinase 1 OS=Mus musculus OX=10090 GN=Lrrk1 PE=1 SV=1	[R].ELLESLPGPCTPQR.[L]	1xCarbamidomethyl [C10]; 3xOxidation [P7; P9; P12]; 1xTMT6plex [N-Term]	Q3UHC2 3xOxidation [P144; P146; P149]	0.296675	0.022552	1	1	1	Q3UHC2	Q3UHC2 [138-151]	0	1873.95	0					No Quan Values	High	High	High	High	High	High	High	High	High	High	High	Low	12.28	12.28	0.007203	0.199	0.1186	1	1.29	9
Medium	Leucine-rich repeat-containing protein 27 OS=Mus musculus OX=10090 GN=Lrrc27 PE=4 SV=1	[R].HSQGGSSGAPR.[E]	1xDeamidated [Q3]; 1xOxidation [P10]; 1xTMT6plex [N-Term]	D3Z4R3 1xOxidation [P336]	0.502685	0.0484172	1	1	1	D3Z4R3	D3Z4R3 [327-337]	0	1286.63	0					No Quan Values	Medium	Medium	Medium	Medium	Medium	Medium	Medium	Medium	Medium	Medium	n/a	Medium		-1.96		0.0178		0.2307	1.35
Medium	Leukocyte tyrosine kinase receptor OS=Mus musculus OX=10090 GN=Ltk PE=1 SV=3	[R].VPDTGQYLISAYGAAGGK.[G]	1xOxidation [P2]; 1xTMT6plex [K18]; 1xTMT6plex [N-Term]	P08923 1xOxidation [P114]	0.378212	0.0315764	1	2	3	P08923	P08923 [113-130]	0	2242.21	0	790	689	18.38	12.56		Medium	Medium	Medium	Medium	Medium	Medium	Medium	Medium	Medium	Medium	n/a	Medium		6.76		0.01479		0.2033	3.21		876.5	547.4	712.1	709.5	906.8	547.4	689	771.7	741.3	679.2
High	Leukotriene A-4 hydrolase OS=Mus musculus OX=10090 GN=Lta4h PE=1 SV=4	[K].GSPMEISLPIALSK.[N]	1xOxidation [P/M]; 1xTMT6plex [K14]; 1xTMT6plex [N-Term]	P24527 1xOxidation [P]	6.11067e-05	0	1	1	4	P24527	P24527 [84-97]	0	1917.11	0	168.6	181.6	5.07	3.91		High	High	High	High	High	High	High	High	High	High	High	High	0.68	0.68	0	1.196e-05	8.535e-06	0.0001249	4.93	40	165.4	178.5	171.8	160.2	160.8	181.6	171.2	183.9	169.8	183.7
High	LIM domain-binding protein 3 OS=Mus musculus OX=10090 GN=Ldb3 PE=1 SV=1	[R].ASPGALEFGDTFSSSFSQTSVCSPLMEASGPVLPLGSPVAK.[A]	1xCarbamidomethyl [C22]; 1xOxidation [P/M]; 1xTMT6plex [K41]; 1xTMT6plex [N-Term]	Q9JKS4 1xOxidation [P]	3.05947e-08	0	1	3	4	Q9JKS4	Q9JKS4 [128-168]	0	4587.3	0	38.7	34.1	13.73	16.77		High	High	High	High	High	High	High	High	High	High	High	High	2.56	3.06	0	0	9.729e-06	3.591e-08	5.3	6	32.2	36.9	44.5	32.6	40.6	34.1	34.1	29.1	44.6	40.7
High	LIM domain-binding protein 3 OS=Mus musculus OX=10090 GN=Ldb3 PE=1 SV=1	[R].TPLCGHCNNVIR.[G]	2xCarbamidomethyl [C4; C7]; 1xOxidation [P2]; 1xTMT6plex [N-Term]	Q9JKS4 1xOxidation [P545]	0.0931228	0.00670765	1	5	1	Q9JKS4	Q9JKS4 [544-555]	0	1685.84	0	95.6	98.2	8.43	12.61		High	High	High	High	High	High	High	High	High	High	n/a	High		0.65		0.001775		0.02391	1.99		88.8	98.5	111.3	97.8	93.6	98.2	96.3	109.6	94.2	125.9
High	LIM domain-binding protein 3 OS=Mus musculus OX=10090 GN=Ldb3 PE=1 SV=1	[K].RPIPISTTAPPIQSPLPVIPHQK.[D]	5xOxidation [P2; P4; P10; P11; P15]; 1xTMT6plex [K23]; 1xTMT6plex [N-Term]	Q9JKS4 5xOxidation [P86; P88; P94; P95; P99]	0.074962	0.00533164	1	1	3	Q9JKS4	Q9JKS4 [85-107]	0	3025.75	0	119.8	127.5	18.25	14.93		High	High	High	High	High	High	High	High	High	High	High	n/a	-3.5		0.001603		0.02424			6	102.2	163.3	138.3	106.4	124.7	154.1	154.3	121.7	109.9	127.5
High	L-lactate dehydrogenase B chain OS=Mus musculus OX=10090 GN=Ldhb PE=1 SV=2	[K].YSPDCTIIVVSNPVDILTYVTWK.[L]	1xCarbamidomethyl [C5]; 1xOxidation [P13]; 1xTMT6plex [K23]; 1xTMT6plex [N-Term]	P16125 1xOxidation [P140]	0.0140294	0.000629802	1	3	2	P16125	P16125 [128-150]	0	3157.69	0	10.4	8.4	17.88	35.05		High	High	High	High	High	High	High	High	High	High	High	High	3.11	3.11	0.0002896	0.0001969	0.005689	0.002408	2.49	17	9.1	12.1	8.8	10.1	13.8	6.1	10.4	8.4	10.3	4
High	Long-chain-fatty-acid--CoA ligase 1 OS=Mus musculus OX=10090 GN=Acsl1 PE=1 SV=2	[R].GIQVSNNGPCLGSR.[K]	1xCarbamidomethyl [C10]; 1xDeamidated [N]; 1xOxidation [P9]; 1xTMT6plex [N-Term]	P41216 1xOxidation [P108]	0.00016784	0	1	3	14	P41216	P41216 [100-113]	0	1704.85	0	320.9	348.3	4.9	4.41		High	High	High	High	High	High	High	High	High	High	High	High	-1.53	1.87	0	0	2.642e-05	6.356e-05	3.15	6	311.7	309.8	332.8	319.6	322.3	349.1	318.7	348.3	353.7	329.7
High	Long-chain-specific acyl-CoA dehydrogenase, mitochondrial OS=Mus musculus OX=10090 GN=Acadl PE=1 SV=1 Long-chain specific acyl-CoA dehydrogenase, mitochondrial OS=Mus musculus OX=10090 GN=Acadl PE=1 SV=2	[R].VQPIYGGTNEIMK.[E]	2xOxidation [P3; M12]; 1xTMT6plex [K13]; 1xTMT6plex [N-Term]	A0A0R4J083 2xOxidation [P409; ]; P51174 2xOxidation [P409; ]	0.00073467	2.60064e-05	2	2	2	A0A0R4J083; P51174	A0A0R4J083 [407-419]; P51174 [407-419]	0	1940.06	0					No Quan Values	High	High	High	High	High	High	High	High	High	High	High	High	1.9	1.9	2.781e-05	6.99e-06	0.0003045	7.209e-05	2.11	18
Medium	Lysine-specific demethylase 2B OS=Mus musculus OX=10090 GN=Kdm2b PE=1 SV=1	[K].LESLPENK.[K]	1xOxidation [P5]; 1xTMT6plex [K8]; 1xTMT6plex [N-Term]	Q6P1G2 1xOxidation [P501]	0.485836	0.0461897	1	1	1	Q6P1G2	Q6P1G2 [497-504]	0	1403.81	0	137.9	182.6	18.8	85.99		Medium	Medium	Medium	Medium	Medium	Medium	Medium	Medium	Medium	Medium	Medium	Low	-0.3	-0.3	0.01494	0.05222	0.2065	0.5852	2.31	16	130.5	200.4	141.3	124.9	134.6	182.6	153.5	114.7	213.5	674.4
Medium	Lysine-specific demethylase 6B OS=Mus musculus OX=10090 GN=Kdm6b PE=1 SV=1	[R].SAINPVDTADPVDSGTEPQPPPAQAK.[E]	2xDeamidated [N4; Q19]; 1xOxidation [P22]; 1xTMT6plex [K26]; 1xTMT6plex [N-Term]	Q5NCY0 1xOxidation [P954]	0.429702	0.0379916	1	1	1	Q5NCY0	Q5NCY0 [933-958]	0	3078.55	0	6.2	8.8	22	31.47		Medium	Medium	Medium	Medium	Medium	Medium	Medium	Medium	Medium	Medium	n/a	Medium		10.38		0.01261		0.185	0.87		9.4	5.5	5.8	6.1	6.3	9.9	8.8	4.7	5.5	9.8
Medium	Major vault protein OS=Mus musculus OX=10090 GN=Mvp PE=1 SV=4	[R].LAQDPFPLYPGELLEK.[D]	2xOxidation [P7; P10]; 1xTMT6plex [K16]; 1xTMT6plex [N-Term]	Q9EQK5 2xOxidation [P98; P101]	0.316727	0.0243342	1	3	1	Q9EQK5	Q9EQK5 [92-107]	0	2320.28	0	464.3	522.8	48.93	19.75		High	High	High	High	High	High	High	High	High	High	n/a	High		1.72		0.00775		0.1196	2.59		579.2	759.7	422.2	326.7	114.6	536	614.6	377.9	409.3	522.8
High	Malate dehydrogenase, cytoplasmic OS=Mus musculus OX=10090 GN=Mdh1 PE=1 SV=3	[K].VIVVGNPANTNCLTASK.[S]	1xCarbamidomethyl [C12]; 1xDeamidated [N]; 1xOxidation [P7]; 1xTMT6plex [K17]; 1xTMT6plex [N-Term]	P14152 1xOxidation [P132]	0.000675491	0	1	2	14	P14152	P14152 [126-142]	0	2233.23	0	1313.3	1283.3	8.5	5.61		High	High	High	High	High	High	High	High	High	High	High	High	-0.51	-1.52	0	0.0002361	0.000126	0.003016	4.19	26	1344.3	1243.1	1283.1	1099.4	1390.9	1260.7	1299.1	1283.3	1227.6	1418.9
High	Malate dehydrogenase, cytoplasmic OS=Mus musculus OX=10090 GN=Mdh1 PE=1 SV=3	[K].VIVVGNPANTNCLTASK.[S]	1xCarbamidomethyl [C12]; 1xOxidation [P7]; 1xTMT6plex [K17]; 1xTMT6plex [N-Term]	P14152 1xOxidation [P132]	0.000288692	0	1	2	42	P14152	P14152 [126-142]	0	2232.24	0	2684	2714	5.79	2.3		High	High	High	High	High	High	High	High	High	High	High	High	-1.4	-1.17	0	0.0004062	0.0001668	0.005785	3.63	28	2726.5	2556.8	2756.4	2519.3	2642	2646.1	2714	2793	2672.6	2770.5
High	Malate dehydrogenase, mitochondrial OS=Mus musculus OX=10090 GN=Mdh2 PE=1 SV=3	[K].GYLGPEQLPDCLK.[G]	1xCarbamidomethyl [C11]; 1xOxidation [P]; 1xTMT6plex [K13]; 1xTMT6plex [N-Term]	P08249 1xOxidation [P]	0.000137907	0	1	2	55	P08249	P08249 [79-91]	0	1964.06	0	4837.9	5005.5	3.97	1.6		High	High	High	High	High	High	High	High	High	High	High	High	0.1	-0.67	0	1.196e-05	0.000191	0.0001227	3.65	22	4940	4738	5057.7	4672.1	4605	4906	4906.7	5087.9	5005.5	5032.5
High	Malate dehydrogenase, mitochondrial OS=Mus musculus OX=10090 GN=Mdh2 PE=1 SV=3	[K].GCDVVVIPAGVPR.[K]	1xCarbamidomethyl [C2]; 1xOxidation [P8]; 1xTMT6plex [N-Term]	P08249 1xOxidation [P99]	0.000291403	0	1	2	3	P08249	P08249 [92-104]	0	1583.88	0	5.4	7.9	37.17	15.64		High	High	High	High	High	High	High	High	High	High	High	High	-1.59	-1.59	0	1.196e-05	4.908e-05	0.0001268	2.81	23	5.9	2.2	5.9	5	4.6	8.7	7.8	7.9	5.7	8.5
High	Malate dehydrogenase, mitochondrial OS=Mus musculus OX=10090 GN=Mdh2 PE=1 SV=3	[K].ETECTYFSTPLLLGK.[K]	1xCarbamidomethyl [C4]; 1xOxidation [P10]; 1xTMT6plex [K15]; 1xTMT6plex [N-Term]	P08249 1xOxidation [P291]	0.00011121	0	1	1	35	P08249	P08249 [282-296]	0	2233.18	0	2606.8	2590	5.62	1.58		High	High	High	High	High	High	High	High	High	High	High	High	-3.86	-3.86	0	0	1.67e-05	6.191e-05	4.16	31	2706.6	2546.3	2668.8	2322.4	2514.9	2657	2567.6	2590	2571	2640.6
High	Malate dehydrogenase, mitochondrial OS=Mus musculus OX=10090 GN=Mdh2 PE=1 SV=3	[K].TIIPLISQCTPK.[V]	1xCarbamidomethyl [C9]; 1xDeamidated [Q8]; 1xOxidation [P11]; 1xTMT6plex [K12]; 1xTMT6plex [N-Term]	P08249 1xOxidation [P214]	0.0556205	0.00411492	1	1	2	P08249	P08249 [204-215]	0	1846.08	0	165	172.6	8.32	2.7		High	High	High	High	High	High	High	High	High	High	High	High	10.79	10.79	0.001149	0.008421	0.01743	0.1293	2.35	8	163.3	147.1	173.3	149.5	166.8	171.5	174.4	173	172.6	162.8
High	Malate dehydrogenase, mitochondrial OS=Mus musculus OX=10090 GN=Mdh2 PE=1 SV=3	[K].TIIPLISQCTPK.[V]	1xCarbamidomethyl [C9]; 1xOxidation [P11]; 1xTMT6plex [K12]; 1xTMT6plex [N-Term]	P08249 1xOxidation [P214]	0.00157723	0.000170585	1	1	38	P08249	P08249 [204-215]	0	1845.09	1	1808.5	1976.5	9.92	5.48		High	High	High	High	High	High	High	High	High	High	High	High	-0.25	0.76	0.0001257	0.0001448	0.001366	0.001848	3.08	16	1884.2	1730.6	1997	1626	1735.8	1842.9	1920.5	1978.6	1976.5	2137.3
High	Malate dehydrogenase, mitochondrial OS=Mus musculus OX=10090 GN=Mdh2 PE=1 SV=3	[R].LTLYDIAHTPGVAADLSHIETR.[A]	1xOxidation [P10]; 1xTMT6plex [N-Term]	P08249 1xOxidation [P62]	5.02333e-07	0	1	3	8	P08249	P08249 [53-74]	0	2638.4	0	83.7	92.2	10.06	3.88		High	High	High	High	High	High	High	High	High	High	High	High	-2.85	1.52	0	0	9.082e-06	1.171e-06	4.71	22	75.8	90	94.3	76.6	77.9	95.9	86.1	92.2	90.7	92.7
High	Malate dehydrogenase, mitochondrial OS=Mus musculus OX=10090 GN=Mdh2 PE=1 SV=3	[K].VAVLGASGGIGQPLSLLLK.[N]	1xOxidation [P13]; 1xTMT6plex [K19]; 1xTMT6plex [N-Term]	P08249 1xOxidation [P39]	6.52961e-08	0	1	2	4	P08249	P08249 [27-45]	0	2267.41	0	37.3	47.4	26.48	20.73		High	High	High	High	High	High	High	High	High	High	High	High	-0.94	0.92	0	0	4.036e-09	3.336e-07	4.46	34	49.9	39.3	55.8	28.3	32.2	47.4	34	33.7	48.4	53.4
Medium	Manganese-transporting ATPase 13A1 OS=Mus musculus OX=10090 GN=Atp13a1 PE=1 SV=2	[K].QFLPVAFPVGNAFSYYQSNR.[G]	2xDeamidated [Q1; N19]; 1xOxidation [P8]; 1xTMT6plex [N-Term]	Q9EPE9 1xOxidation [P192]	0.151607	0.0109985	1	1	1	Q9EPE9	Q9EPE9 [185-204]	0	2552.27	0	10.6	11.7	24.25	25.31		High	High	High	High	High	High	High	High	High	High	High	n/a	12.85		0.003292		0.05398			1	9.6	10.2	11	11.5	11	6.7	13.9	10.4	13.1	11.7
High	Mannose-6-phosphate isomerase OS=Mus musculus OX=10090 GN=Mpi PE=1 SV=1	[K].SEVACLLASSDPLAQISEDKPYAELWMGTHPR.[G]	1xCarbamidomethyl [C5]; 3xOxidation [P21; M27; P]; 1xTMT6plex [K20]; 1xTMT6plex [N-Term]	Q924M7 3xOxidation [P45; P]	0.000423492	0	1	2	2	Q924M7	Q924M7 [25-56]	0	4078.03	0	61.7	69.9	5.92	11.59		High	High	High	High	High	High	High	High	High	High	High	High	2.86	2.86	0	0	8.378e-05	3.759e-05	6.12	21	65.4	56.4	57.8	60.5	63	56.9	59.6	69.9	73.9	72.2
High	Mannose-6-phosphate isomerase OS=Mus musculus OX=10090 GN=Mpi PE=1 SV=1	[R].LFAPAQSQDDPYLSIYDPPVPDFTVMK.[M]	1xDeamidated [Q8]; 1xOxidation [P11]; 1xTMT6plex [K27]; 1xTMT6plex [N-Term]	Q924M7 1xOxidation [P333]	0.0954545	0.00686669	1	1	3	Q924M7	Q924M7 [323-349]	0	3529.79	0	17.2	16.8	16.27	21.78		High	High	High	High	High	High	High	High	High	High	Medium	High	11.05	9.79	0.01721	0.001833	0.2288	0.02468	3.47	23	17.5	18.9	22.3	14.7	14.8	19.7	11.3	16.8	15.8	20.6
Medium	Matrix metalloproteinase-25 OS=Mus musculus OX=10090 GN=Mmp25 PE=2 SV=1	[R].VTSPPK.[T]	2xOxidation [P4; P5]; 1xTMT6plex [K6]; 1xTMT6plex [N-Term]	Q3U435 2xOxidation [P574; P575]	0.474796	0.0446876	1	1	1	Q3U435	Q3U435 [571-576]	0	1118.68	0	640.3	692.9	4.54	6.35		Medium	Medium	Medium	Medium	Medium	Medium	Medium	Medium	Medium	Medium	Medium	n/a	1.91		0.01434		0.2007			22	659	579.9	635.9	656.9	641.9	732.9	693.7	636.8	692.9	630.9
Medium	Mediator of RNA polymerase II transcription subunit 23 OS=Mus musculus OX=10090 GN=Med23 PE=1 SV=2	[K].MEPAVPPQALNSGSPAPQSNQVPASLPVTQ.[-]	3xDeamidated [N11; Q18; N20]; 4xOxidation [P15; P17; P23; P27]; 1xTMT6plex [N-Term]	Q80YQ2 4xOxidation [P1352; P1354; P1360; P1364]	0.417016	0.0363399	1	1	1	Q80YQ2	Q80YQ2 [1338-1367]	0	3308.6	0					No Quan Values	Medium	Medium	Medium	Medium	Medium	Medium	Medium	Medium	Medium	Medium	Medium	n/a	10.34		0.01174		0.1743			2
High	Methanethiol oxidase OS=Mus musculus OX=10090 GN=Selenbp1 PE=1 SV=2	[R].GGSVQVLEDQELTCQPEPLVVK.[G]	1xCarbamidomethyl [C14]; 1xOxidation [P]; 1xTMT6plex [K22]; 1xTMT6plex [N-Term]	P17563 1xOxidation [P]	3.00155e-06	0	1	4	6	P17563	P17563 [358-379]	0	2899.55	0	146.3	135.4	9.22	8.62		High	High	High	High	High	High	High	High	High	High	High	High	1.64	3.11	0	0	6.398e-06	4.497e-06	4.93	28	173.5	146	153.7	133.2	141.3	124.8	129.9	135.4	155.7	138.8
High	Methylcytosine dioxygenase TET3 OS=Mus musculus OX=10090 GN=Tet3 PE=1 SV=3	[K].NLNQPNHGLALWEAK.[M]	1xDeamidated [N1]; 1xOxidation [P5]; 1xTMT6plex [K15]; 1xTMT6plex [N-Term]	Q8BG87 1xOxidation [P1575]	0.131787	0.00946445	1	2	2	Q8BG87	Q8BG87 [1571-1585]	0	2180.19	0	85.9	86.4	8.04	8.43		High	High	High	High	High	High	High	High	High	High	High	Medium	-2.7	-2.7	0.002853	0.03965	0.04619	0.4494	1.98	11	87.7	76.2	84.1	77.3	93.5	75.9	94.5	86.4	81.3	89.6
High	Methylmalonate-semialdehyde dehydrogenase [acylating], mitochondrial OS=Mus musculus OX=10090 GN=Aldh6a1 PE=1 SV=1	[K].GYENGNFVGPTIISNVKPSMTCYK.[E]	1xCarbamidomethyl [C22]; 1xDeamidated [N4]; 1xOxidation [P/M]; 2xTMT6plex [K17; K24]; 1xTMT6plex [N-Term]	Q9EQ20 1xOxidation [P]	2.89126e-06	0	1	1	15	Q9EQ20	Q9EQ20 [392-415]	0	3380.75	0	688.3	707.1	6.13	7.78		High	High	High	High	High	High	High	High	High	High	High	High	3.53	2.2	0	0	1.176e-05	2.957e-06	6.28	23	680.4	691.3	720.6	637.4	685.4	686.4	664.4	760.1	802.2	707.1
High	Methylmalonate-semialdehyde dehydrogenase [acylating], mitochondrial OS=Mus musculus OX=10090 GN=Aldh6a1 PE=1 SV=1	[K].LLQDSGAPDGTLNIIHGQHDAVNFICDHPDIK.[A]	1xCarbamidomethyl [C26]; 1xOxidation [P]; 1xTMT6plex [K32]; 1xTMT6plex [N-Term]	Q9EQ20 1xOxidation [P]	0.000164729	0	1	1	4	Q9EQ20	Q9EQ20 [224-255]	0	3985.03	0	218.2	200.3	3.92	9.68		High	High	High	High	High	High	High	High	High	High	High	High	0.73	2.02	0	0.0007124	2.587e-05	0.01073	5.25	15	209.3	219.1	217.3	199	219.8	184.6	196.2	200.3	237.5	206.7
High	MICAL-like protein 1 OS=Mus musculus OX=10090 GN=Micall1 PE=1 SV=3	[K].DPAPPSPTSTSPAVQPGEEAQGDDLSPDSLSEQGK.[Q]	5xOxidation [P4; P5; P7; P12; P16]; 1xTMT6plex [K35]; 1xTMT6plex [N-Term]	Q8BGT6 5xOxidation [P126; P127; P129; P134; P138]	7.72457e-06	0	1	1	1	Q8BGT6	Q8BGT6 [123-157]	0	4029.89	0	27.2	25.8	7.01	11.21		High	High	High	High	High	High	High	High	High	High	High	n/a	1.69		0		8.449e-07			42	24.5	29.1	29.3	25.7	27.7	27.9	21.5	22	25.8	25.8
High	MICOS complex subunit MIC13 OS=Mus musculus OX=10090 GN=Micos13 PE=1 SV=1	[K].GSVAGGAVYLVYDQELLGPSDK.[S]	1xDeamidated [Q14]; 1xOxidation [P19]; 1xTMT6plex [K22]; 1xTMT6plex [N-Term]	Q8R404 1xOxidation [P33]	0.000272944	0	1	1	2	Q8R404	Q8R404 [15-36]	0	2713.43	0	82.8	83.6	11.28	7.83		High	High	High	High	High	High	High	High	High	High	High	High	14.2	14.2	0	1.196e-05	4.565e-05	0.0001581	5.64	31	79.9	91.8	77.1	103.4	83.5	87.3	83.6	86.6	77.7	72.3
High	MICOS complex subunit Mic19 OS=Mus musculus OX=10090 GN=Chchd3 PE=1 SV=1	[R].YEYHPVCADLQTK.[I]	1xCarbamidomethyl [C7]; 1xOxidation [P5]; 1xTMT6plex [K13]; 1xTMT6plex [N-Term]	Q9CRB9 1xOxidation [P181]	0.00532172	0.000414721	1	2	6	Q9CRB9	Q9CRB9 [177-189]	0	2098.07	0	227.5	238	8.53	10.24		High	High	High	High	High	High	High	High	High	High	High	High	0.55	0.64	0.0001242	0.0009549	0.001255	0.01328	2.88	9	196.9	251.7	247.1	228.7	226.4	225.7	202.7	238	266.2	251
High	MICOS complex subunit Mic60 OS=Mus musculus OX=10090 GN=Immt PE=1 SV=1 Isoform 2 of MICOS complex subunit Mic60 OS=Mus musculus OX=10090 GN=Immt MICOS complex subunit MIC60 OS=Mus musculus OX=10090 GN=Immt PE=1 SV=1	[R].VNCSDNEFTQALTAAIPPESLTR.[G]	1xCarbamidomethyl [C3]; 1xDeamidated [Q/N]; 1xOxidation [P]; 1xTMT6plex [N-Term]	Q8CAQ8 1xOxidation [P]; Q8CAQ8-2 1xOxidation [P]; E9Q800 1xOxidation [P]	0.000140512	0	3	6	2	Q8CAQ8; Q8CAQ8-2; E9Q800	Q8CAQ8 [600-622]; Q8CAQ8-2 [589-611]; E9Q800 [522-544]	0	2780.36	0	39.5	41.3	9.97	12.26	Shared	High	High	High	High	High	High	High	High	High	High	High	High	14.61	14.61	5.759e-05	0	0.000651	1.014e-05	5.83	33	36.5	46.3	39.7	35.7	43.1	50.4	38.5	39.9	48.5	41.3
High	MICOS complex subunit Mic60 OS=Mus musculus OX=10090 GN=Immt PE=1 SV=1 Isoform 2 of MICOS complex subunit Mic60 OS=Mus musculus OX=10090 GN=Immt MICOS complex subunit MIC60 OS=Mus musculus OX=10090 GN=Immt PE=1 SV=1	[R].VNCSDNEFTQALTAAIPPESLTR.[G]	1xCarbamidomethyl [C3]; 1xOxidation [P17]; 1xTMT6plex [N-Term]	Q8CAQ8 1xOxidation [P616]; Q8CAQ8-2 1xOxidation [P605]; E9Q800 1xOxidation [P538]	0.0451622	0.00307848	3	6	6	Q8CAQ8; Q8CAQ8-2; E9Q800	Q8CAQ8 [600-622]; Q8CAQ8-2 [589-611]; E9Q800 [522-544]	0	2779.38	0	184.4	181.3	4.22	5.73	Shared	High	High	High	High	High	High	High	High	High	High	n/a	High		-2.05		0.0006569		0.009818	3.22		176.7	179.2	191.1	177.5	194.2	182.4	181.3	178	199.7	171.5
High	MICOS complex subunit Mic60 OS=Mus musculus OX=10090 GN=Immt PE=1 SV=1 Isoform 2 of MICOS complex subunit Mic60 OS=Mus musculus OX=10090 GN=Immt MICOS complex subunit MIC60 OS=Mus musculus OX=10090 GN=Immt PE=1 SV=1	[K].ELDSITPDITPGWK.[G]	1xOxidation [P11]; 1xTMT6plex [K14]; 1xTMT6plex [N-Term]	Q8CAQ8 1xOxidation [P381]; Q8CAQ8-2 1xOxidation [P370]; E9Q800 1xOxidation [P303]	3.05739e-05	0	3	7	8	Q8CAQ8; Q8CAQ8-2; E9Q800	Q8CAQ8 [371-384]; Q8CAQ8-2 [360-373]; E9Q800 [293-306]	0	2046.12	0	667.6	614.8	8.3	8.79	Shared	High	High	High	High	High	High	High	High	High	High	High	High	-0.99	-0.93	0	4.502e-05	3.956e-06	0.0006077	5.21	16	556.1	592.7	688.3	670	665.2	582.7	614.8	672	711.6	589.8
High	MICOS complex subunit Mic60 OS=Mus musculus OX=10090 GN=Immt PE=1 SV=1 Isoform 2 of MICOS complex subunit Mic60 OS=Mus musculus OX=10090 GN=Immt MICOS complex subunit MIC60 OS=Mus musculus OX=10090 GN=Immt PE=1 SV=1	[K].ELDSITPDITPGWK.[G]	2xOxidation [P7; P11]; 1xTMT6plex [K14]; 1xTMT6plex [N-Term]	Q8CAQ8 2xOxidation [P377; P381]; Q8CAQ8-2 2xOxidation [P366; P370]; E9Q800 2xOxidation [P299; P303]	0.0775283	0.00548932	3	7	3	Q8CAQ8; Q8CAQ8-2; E9Q800	Q8CAQ8 [371-384]; Q8CAQ8-2 [360-373]; E9Q800 [293-306]	0	2062.11	0	331.8	366.9	5.13	6.01	Shared	High	High	High	High	High	High	High	High	High	High	High	High	-1.08	0.53	0.002048	0.001296	0.03083	0.01904	1.62	1	329.3	304.3	353.6	320.1	340.2	319.3	370.4	368.6	356.1	366.9
High	Microsomal glutathione S-transferase 3 OS=Mus musculus OX=10090 GN=Mgst3 PE=1 SV=1	[K].VEYPVMYSTDPENGHMFNCIQR.[A]	1xCarbamidomethyl [C19]; 1xDeamidated [N]; 1xOxidation [P/M]; 1xTMT6plex [N-Term]	Q9CPU4 1xOxidation [P]	6.35004e-09	0	1	1	49	Q9CPU4	Q9CPU4 [38-59]	0	2933.31	0	1631.3	1657.9	6.16	2.96		High	High	High	High	High	High	High	High	High	High	High	High	-0.23	2.95	0	0	1.539e-09	4.768e-08	6.12	46	1624.1	1842.7	1638.4	1622.2	1660.3	1688.9	1625.6	1641	1750.9	1657.9
High	Microsomal glutathione S-transferase 3 OS=Mus musculus OX=10090 GN=Mgst3 PE=1 SV=1	[K].VEYPVMYSTDPENGHMFNCIQR.[A]	1xCarbamidomethyl [C19]; 1xOxidation [P/M]; 1xTMT6plex [N-Term]	Q9CPU4 1xOxidation [P]	4.70219e-05	0	1	1	4	Q9CPU4	Q9CPU4 [38-59]	0	2932.33	0	88.4	85.6	11.66	11.48		High	High	High	High	High	High	High	High	High	High	High	High	-3.33	-3.33	0	0.0002007	7.556e-05	0.002523	3.08	15	78.4	100.3	97.9	74.6	89.9	108.8	84.5	84.3	91	85.6
High	Microsomal glutathione S-transferase 3 OS=Mus musculus OX=10090 GN=Mgst3 PE=1 SV=1	[K].YKVEYPVMYSTDPENGHMFNCIQR.[A]	1xCarbamidomethyl [C21]; 1xDeamidated [N]; 1xOxidation [P/M]; 1xTMT6plex [K2]; 1xTMT6plex [N-Term]	Q9CPU4 1xOxidation [P]	3.83e-08	0	1	1	11	Q9CPU4	Q9CPU4 [36-59]	1	3453.63	0	298.1	315.4	7.65	10.21		High	High	High	High	High	High	High	High	High	High	High	High	0	3.24	0	0	1.235e-08	9.043e-08	6.48	27	294.3	343.3	315.1	276.5	290.7	315.4	285.5	295.6	333	367.7
Medium	Microtubule-associated protein 2 OS=Mus musculus OX=10090 GN=Map2 PE=1 SV=2	[K].GEVQMEFIQLPK.[E]	2xDeamidated [Q4; Q9]; 1xOxidation [P11]; 1xTMT6plex [K12]; 1xTMT6plex [N-Term]	P20357 1xOxidation [P1206]	0.331351	0.0260591	1	1	1	P20357	P20357 [1196-1207]	0	1895.02	0	79.5	93.7	2.61	14.72		High	High	High	High	High	High	High	High	High	High	High	Low	14.66	14.66	0.008385	0.3145	0.1344	1	2.32	5	75.5	77.8	79.9	79.1	81.1	95.2	93.7	93.7	67.9	75.9
Medium	Microtubule-associated protein RP/EB family member 2 OS=Mus musculus OX=10090 GN=Mapre2 PE=1 SV=1	[R].QGQDAIPPPDPGEQIFNLPK.[K]	1xOxidation [P9]; 1xTMT6plex [K20]; 1xTMT6plex [N-Term]	Q8R001 1xOxidation [P181]	0.362085	0.0296821	1	5	1	Q8R001	Q8R001 [173-192]	0	2635.41	0	75.1	81.9	11.21	5.75		High	High	High	High	High	High	High	High	High	High	n/a	High		2.38		0.009394		0.145	2.77		61	73.5	80.9	68	76.7	73.5	82.2	78.8	85.8	81.9
High	Mitochondrial antiviral-signaling protein OS=Mus musculus OX=10090 GN=Mavs PE=1 SV=1	[R].ETPSCPKPVQDTQPPESPVENSEQLLQTNSGAVAR.[M]	1xCarbamidomethyl [C5]; 1xDeamidated [Q10]; 5xOxidation [P3; P6; P8; P15; P18]; 1xTMT6plex [K7]; 1xTMT6plex [N-Term]	Q8VCF0 5xOxidation [P138; P141; P143; P150; P153]	4.79102e-05	0	1	1	1	Q8VCF0	Q8VCF0 [136-170]	0	4330.1	0	67.8	62.6	10.91	7.17		High	High	High	High	High	High	High	High	High	High	High	n/a	1.81		0		6.507e-06			11	71.5	54.7	64.4	72.4	63.8	62.6	69.3	71.3	61.1	62.1
High	Mitochondrial antiviral-signaling protein OS=Mus musculus OX=10090 GN=Mavs PE=1 SV=1	[R].ETPSCPKPVQDTQPPESPVENSEQLLQTNSGAVAR.[M]	1xCarbamidomethyl [C5]; 5xOxidation [P3; P6; P8; P15; P18]; 1xTMT6plex [K7]; 1xTMT6plex [N-Term]	Q8VCF0 5xOxidation [P138; P141; P143; P150; P153]	4.48876e-06	0	1	1	1	Q8VCF0	Q8VCF0 [136-170]	0	4329.12	0	85.7	91.8	21.81	11.25		High	High	High	High	High	High	High	High	High	High	High	n/a	1.78		0		4.59e-07			66	61.2	109.8	99.3	77.9	70.3	101.1	87.9	93.5	73.8	91.8
High	Mitochondrial import inner membrane translocase subunit Tim8 A OS=Mus musculus OX=10090 GN=Timm8a1 PE=1 SV=1	[-].MESSTSSSGSALGAVDPQLQHFIEVETQK.[Q]	1xAcetyl [N-Term]; 1xDeamidated [Q18]; 1xOxidation [P17]; 1xTMT6plex [K29]; 1xTMT6plex [N-Term]	Q9WVA2 1xAcetyl [N-Term]; 1xOxidation [P17]	0.115107	0.00837343	1	1	1	Q9WVA2	Q9WVA2 [1-29]	0	3580.77	0	38.4	35.4	9.63	9.9		High	High	High	High	High	High	High	High	High	High	n/a	High		4.62		0.002403		0.03107	3.05		39.4	31.3	39	38.9	37.9	37.7	34.3	40	35.4	30.6
Medium	Mitochondrial import inner membrane translocase subunit Tim8 A OS=Mus musculus OX=10090 GN=Timm8a1 PE=1 SV=1	[-].MESSTSSSGSALGAVDPQLQHFIEVETQK.[Q]	1xAcetyl [N-Term]; 1xOxidation [P17]; 1xTMT6plex [K29]; 1xTMT6plex [N-Term]	Q9WVA2 1xAcetyl [N-Term]; 1xOxidation [P17]	0.250691	0.0187429	1	1	1	Q9WVA2	Q9WVA2 [1-29]	0	3579.79	0					No Quan Values	High	High	High	High	High	High	High	High	High	High	n/a	High		1.05		0.005903		0.08619	2.8
Medium	Monocarboxylate transporter 11 OS=Mus musculus OX=10090 GN=Slc16a11 PE=2 SV=1	[R].GELLPVPQVSLLSAGGTGSIR.[D]	2xOxidation [P5; P7]; 1xTMT6plex [N-Term]	Q5NC32 2xOxidation [P427; P429]	0.325024	0.0252483	1	1	1	Q5NC32	Q5NC32 [423-443]	0	2312.3	0	233.2	240.6	10.3	19.41		High	High	High	High	High	High	High	High	High	High	High	n/a	10.91		0.008158		0.1318			1	201	237.6	253.6	201.3	228.8	315.4	183.4	240.6	257.5	231.7
Medium	MORC family CW-type zinc finger protein 4 OS=Mus musculus OX=10090 GN=Morc4 PE=2 SV=2	[R].GAPAGPGTPGGGLAR.[A]	1xOxidation [P9]; 1xTMT6plex [N-Term]	Q8BMD7 1xOxidation [P14]	0.499853	0.0481149	1	1	1	Q8BMD7	Q8BMD7 [6-20]	0	1480.81	0					No Quan Values	Medium	Medium	Medium	Medium	Medium	Medium	Medium	Medium	Medium	Medium	Medium	n/a	-8.49		0.01559		0.213			3
Medium	Msx2-interacting protein OS=Mus musculus OX=10090 GN=Spen PE=1 SV=2	[R].SLPLSEGGPPLR.[I]	2xOxidation [P9; P10]; 1xTMT6plex [N-Term]	Q62504 2xOxidation [P3525; P3526]	0.348667	0.0282967	1	5	2	Q62504	Q62504 [3517-3528]	0	1483.83	0	132.4	131.2	5.21	14.4		High	High	High	High	High	High	High	High	High	High	Medium	High	0.53	0.53	0.02276	0.009012	0.2874	0.1378	2.29	6	126.4	126.3	140.2	130.3	142.6	129.1	116.7	131.2	146	168.8
Medium	Multiple epidermal growth factor-like domains protein 8 OS=Mus musculus OX=10090 GN=Megf8 PE=1 SV=2	[R].DGLQGPR.[E]	1xOxidation [P6]; 1xTMT6plex [N-Term]	P60882 1xOxidation [P445]	0.494217	0.0474262	1	1	4	P60882	P60882 [440-446]	0	987.542	0	319.9	286.5	10.26	7.38		Medium	Medium	Medium	Medium	Medium	Medium	Medium	Medium	Medium	Medium	Medium	n/a	-0.49		0.01531		0.2096			24	328.6	319.9	281.8	342.3	319.8	277.9	293.4	286.5	287.8	242.3
Medium	Myocyte-specific enhancer factor 2A OS=Mus musculus OX=10090 GN=Mef2a PE=1 SV=2	[R].ASPNLIGNTGANSLGK.[V]	1xDeamidated [N8]; 1xOxidation [P3]; 1xTMT6plex [K16]; 1xTMT6plex [N-Term]	Q60929 1xOxidation [P234]	0.382914	0.032056	1	3	1	Q60929	Q60929 [232-247]	0	1989.1	0	132.6	148.7	6.59	9.67		Medium	Medium	Medium	Medium	Medium	Medium	Medium	Medium	Medium	Medium	n/a	Medium		-6.73		0.01022		0.1562	1.8		123.8	148.5	134.1	125.7	133.5	164.2	147.6	125.4	148.7	154.7
High	Myoglobin OS=Mus musculus OX=10090 GN=Mb PE=1 SV=3	[K].KGQHAAEIQPLAQSHATK.[H]	1xOxidation [P10]; 2xTMT6plex [K1; K18]; 1xTMT6plex [N-Term]	P04247 1xOxidation [P89]	0.000953891	5.03951e-05	1	2	2	P04247	P04247 [80-97]	1	2618.5	0	58	46	7.4	13.57		High	High	High	High	High	High	High	High	High	High	High	High	0.56	0.56	2.781e-05	1.196e-05	0.0003042	9.92e-05	5.48	16	57.2	59.2	55.5	62.1	58.7	43.5	39.6	46	51.2	56
Medium	Myoglobin OS=Mus musculus OX=10090 GN=Mb PE=1 SV=3	[K].THPETLDKFDK.[F]	1xOxidation [P3]; 2xTMT6plex [K8; K11]; 1xTMT6plex [N-Term]	P04247 1xOxidation [P38]	0.18582	0.0132596	1	2	5	P04247	P04247 [36-46]	1	2034.15	0	538.3	519.8	8.86	9.82		High	High	High	High	High	High	High	High	High	High	n/a	High		-1.53		0.007623		0.1176	3.73		520.6	520.5	586.1	472.9	603	580.7	464.4	588.4	519.8	506.6
High	Myoglobin OS=Mus musculus OX=10090 GN=Mb PE=1 SV=3	[K].GQHAAEIQPLAQSHATK.[H]	1xOxidation [P9]; 1xTMT6plex [K17]; 1xTMT6plex [N-Term]	P04247 1xOxidation [P89]	4.36303e-05	0	1	2	4	P04247	P04247 [81-97]	0	2261.24	0	123	103.2	17.1	15.35		High	High	High	High	High	High	High	High	High	High	High	High	0.4	0.4	0	0	4.387e-05	1.121e-05	5.13	12	121.7	151.5	129	101.6	93.8	103.2	102.7	99.2	115.5	141.2
High	Myomesin 2 OS=Mus musculus OX=10090 GN=Myom2 PE=1 SV=1	[K].TLNLTCTVFGNPDPEVVWFK.[N]	1xCarbamidomethyl [C6]; 2xOxidation [P12; P14]; 1xTMT6plex [K20]; 1xTMT6plex [N-Term]	Q14BI5 2xOxidation [P1372; P1374]	0.000482663	0	1	1	1	Q14BI5	Q14BI5 [1361-1380]	0	2827.47	0	63.5	69.9	10.24	4.09		High	High	High	High	High	High	High	High	High	High	n/a	High		2		0		4.379e-05	4.02		59.5	56.3	67.1	63.2	75.2	72.1	70.5	69.9	64.6	68.7
High	Myomesin 2 OS=Mus musculus OX=10090 GN=Myom2 PE=1 SV=1	[K].EIVIYQDDLEGDVQIPGPPTNVQASEVSR.[N]	1xDeamidated [Q/N]; 1xOxidation [P16]; 1xTMT6plex [N-Term]	Q14BI5 1xOxidation [P511]	1.57356e-06	0	1	1	2	Q14BI5	Q14BI5 [496-524]	0	3414.71	0	26.4	26.6	9.67	8.31		High	High	High	High	High	High	High	High	High	High	n/a	High		13.74		0		4.974e-08	4.77		26.3	28.7	26.5	24.4	22.1	24.6	26.6	26.5	30.7	26.6
High	Myomesin 2 OS=Mus musculus OX=10090 GN=Myom2 PE=1 SV=1	[R].NYVVLSWDPPSPR.[G]	2xOxidation [P9; P10]; 1xTMT6plex [N-Term]	Q14BI5 2xOxidation [P533; P534]	0.0298015	0.00148964	1	1	1	Q14BI5	Q14BI5 [525-537]	0	1790.93	0	85.5	87.1	6.31	4.12		High	High	High	High	High	High	High	High	High	High	n/a	High		-1.37		0.0004328		0.005971	3.94		84	85.5	94	85.5	83.9	85.7	87.1	81.4	90.5	89.5
High	Myosin light chain 3 OS=Mus musculus OX=10090 GN=Myl3 PE=1 SV=4	[K].IEFTPEQIEEFK.[E]	1xOxidation [P5]; 1xTMT6plex [K12]; 1xTMT6plex [N-Term]	P09542 1xOxidation [P57]	0.0193207	0.000875082	1	2	2	P09542	P09542 [53-64]	0	1984.07	0	248.1	202.9	31.34	8.2		High	High	High	High	High	High	High	High	High	High	High	High	14.49	14.49	0.000264	0.003861	0.00529	0.05221	2.88	13	384.3	193	247.5	155.4	270	228.8	187.2	217.9	194.8	202.9
High	Myosin light chain kinase 3 OS=Mus musculus OX=10090 GN=Mylk3 PE=1 SV=1	[R].ELSLAGSGSTPPTTAQAAWPEVLELVR.[A]	2xOxidation [P12; P20]; 1xTMT6plex [N-Term]	Q3UIZ8 2xOxidation [P86; P94]	2.78558e-07	0	1	1	2	Q3UIZ8	Q3UIZ8 [75-101]	0	3041.6	0	40.1	43.3	15.22	7.89		High	High	High	High	High	High	High	High	High	High	High	High	1.36	1.36	0	0	2.04e-08	2.946e-07	6.8	65	33.9	51.5	38.9	41.4	38.8	37.1	44.5	42	45.8	43.3
High	Myosin light chain kinase 3 OS=Mus musculus OX=10090 GN=Mylk3 PE=1 SV=1	[R].LSSGPLPQPLGPLTPDSDIHSGDALPR.[I]	5xOxidation [P5; P7; P9; P12; P15]; 1xTMT6plex [N-Term]	Q3UIZ8 5xOxidation [P308; P310; P312; P315; P318]	1.54401e-05	0	1	1	2	Q3UIZ8	Q3UIZ8 [304-330]	0	3046.55	0	86.6	87.5	41.14	13.67		High	High	High	High	High	High	High	High	High	High	High	n/a	-2.92		0		1.485e-05			13	50.2	154.5	90.4	104.8	59.8	109.5	77.7	84.6	98.7	87.5
Medium	Myotrophin OS=Mus musculus OX=10090 GN=Mtpn PE=1 SV=2	[K].GADINAPDK.[H]	1xOxidation [P7]; 1xTMT6plex [K9]; 1xTMT6plex [N-Term]	P62774 1xOxidation [P64]	0.266579	0.0200396	1	2	4	P62774	P62774 [58-66]	0	1374.76	0	875.6	945.2	7.85	10.74		High	High	High	High	High	High	High	High	High	High	Medium	High	3.08	-0.4	0.0413	0.006321	0.4605	0.0937	1.86	19	944.1	764.3	957.8	866.6	867.7	1028.3	963.5	913.3	762	945.2
High	Myozenin-2 OS=Mus musculus OX=10090 GN=Myoz2 PE=1 SV=1	[R].VDGSNLEGGSQQGPSTPPNTPDPR.[S]	5xOxidation [P14; P17; P18; P21; P23]; 1xTMT6plex [N-Term]	Q9JJW5 5xOxidation [P105; P108; P109; P112; P114]	1.0041e-06	0	1	1	1	Q9JJW5	Q9JJW5 [92-115]	0	2716.25	0	99.4	92.9	7.75	7.79		High	High	High	High	High	High	High	High	High	High	High	n/a	-1.67		0		8.616e-08			50	83.6	102.1	103	96.8	93.3	105.6	94.3	85.3	92.2	92.9
High	Myristoylated alanine-rich C-kinase substrate OS=Mus musculus OX=10090 GN=Marcks PE=1 SV=2	[R].EAEAAEPEQPEQPEQPAAEEPQAEEQSEAAGEK.[A]	1xDeamidated [Q12]; 1xOxidation [P]; 1xTMT6plex [K33]; 1xTMT6plex [N-Term]	P26645 1xOxidation [P]	2.65874e-08	0	1	1	2	P26645	P26645 [220-252]	0	4008.84	0	32.8	32	7.89	14.36		High	High	High	High	High	High	High	High	High	High	High	High	12.39	12.39	0	0	1.474e-09	1.881e-07	5.02	59	32	33.7	34.5	30.8	29.8	41.2	39.9	31.8	30.5	32
High	NAD(P)H-hydrate epimerase OS=Mus musculus OX=10090 GN=Naxe PE=1 SV=1	[K].SPPTVLVICGPGNNGGDGLVCAR.[H]	2xCarbamidomethyl [C9; C21]; 1xDeamidated [N14]; 1xOxidation [P]; 1xTMT6plex [N-Term]	Q8K4Z3 1xOxidation [P]	0.000246269	0	1	1	3	Q8K4Z3	Q8K4Z3 [101-123]	0	2556.27	0	68.1	67.6	14.38	10.12		High	High	High	High	High	High	High	High	High	High	High	High	0.75	0.75	0	0	4.078e-05	2.253e-05	5.02	16	53.5	58.8	68.4	67.8	80.7	67.6	56.9	65.8	71.7	74.7
High	NAD(P)H-hydrate epimerase OS=Mus musculus OX=10090 GN=Naxe PE=1 SV=1	[K].SPPTVLVICGPGNNGGDGLVCAR.[H]	2xCarbamidomethyl [C9; C21]; 2xDeamidated [N13; N14]; 1xOxidation [P11]; 1xTMT6plex [N-Term]	Q8K4Z3 1xOxidation [P111]	0.0131559	0.000571576	1	1	1	Q8K4Z3	Q8K4Z3 [101-123]	0	2557.26	0					No Quan Values	High	High	High	High	High	High	High	High	High	High	n/a	High		9.62		0.0001884		0.002233	1.55
High	NADH dehydrogenase [ubiquinone] 1 alpha subcomplex subunit 10, mitochondrial OS=Mus musculus OX=10090 GN=Ndufa10 PE=1 SV=1	[K].HYPEAGIQYSSTTTGDGRPLDIEFSGSCSLEK.[F]	1xCarbamidomethyl [C28]; 1xOxidation [P19]; 1xTMT6plex [K32]; 1xTMT6plex [N-Term]	Q99LC3 1xOxidation [P103]	0.000748507	2.60064e-05	1	2	2	Q99LC3	Q99LC3 [85-116]	0	3976.93	0	38.1	39.4	18.04	19.38		High	High	High	High	High	High	High	High	High	High	High	High	3.05	3.05	0	1.196e-05	0.0001415	0.0003445	4.75	22	36.4	53.4	40.4	38.9	37.2	50.7	31.8	33.2	43	39.4
High	NADH dehydrogenase [ubiquinone] 1 alpha subcomplex subunit 10, mitochondrial OS=Mus musculus OX=10090 GN=Ndufa10 PE=1 SV=1	[R].LTLPEYLPPHAVIYIDVPVPEVQSR.[I]	1xOxidation [P18]; 1xTMT6plex [N-Term]	Q99LC3 1xOxidation [P210]	0.00241875	0.000188861	1	1	2	Q99LC3	Q99LC3 [193-217]	0	3090.71	0	20.3	24.1	19.93	8.02		High	High	High	High	High	High	High	High	High	High	High	High	2.02	2.02	0.0002427	1.196e-05	0.004761	0.0002982	4.83	24	17.8	18.6	27.6	21.7	19	24.2	20.4	25.5	23.6	24.1
High	NADH dehydrogenase [ubiquinone] 1 alpha subcomplex subunit 11 OS=Mus musculus OX=10090 GN=Ndufa11 PE=1 SV=2	[R].EKPDDPLNYFIGGCAGGLTLGAR.[TS]	1xCarbamidomethyl [C14]; 1xOxidation [P6]; 1xTMT6plex [K2]; 1xTMT6plex [N-Term]	Q9D8B4 1xOxidation [P87]	0.0244561	0.00113751	1	3	6	Q9D8B4	Q9D8B4 [82-104]	0	2895.51	0	484.4	505.7	2.45	2.6		High	High	High	High	High	High	High	High	High	High	n/a	High		1.77		0.0008624		0.01225	2.57		483.1	485.6	506.9	474.7	477.2	505.7	503.9	530.9	499.1	521
High	NADH dehydrogenase [ubiquinone] 1 alpha subcomplex subunit 3 OS=Mus musculus OX=10090 GN=Ndufa3 PE=1 SV=1	[R].DDGNMPDVPSHPQDPLGPSLDWLK.[N]	2xOxidation [P/M]; 1xTMT6plex [K24]; 1xTMT6plex [N-Term]	Q9CQ91 2xOxidation [P]	2.75908e-06	0	1	2	16	Q9CQ91	Q9CQ91 [59-82]	0	3120.53	0	842.4	864.9	5.68	3.8		High	High	High	High	High	High	High	High	High	High	High	High	-1.34	0.49	0	0	1.236e-06	1.479e-05	5.71	29	804.6	918	844.7	840.2	860.2	912.3	864.9	872.3	821.4	853.8
High	NADH dehydrogenase [ubiquinone] 1 alpha subcomplex subunit 5 OS=Mus musculus OX=10090 GN=Ndufa5 PE=1 SV=3	[K].TTGLVGLAVCDTPHER.[L]	1xCarbamidomethyl [C10]; 1xOxidation [P13]; 1xTMT6plex [N-Term]	Q9CPP6 1xOxidation [P20]	4.01062e-05	0	1	1	9	Q9CPP6	Q9CPP6 [8-23]	0	1971.02	0	338.8	348.5	2.33	3.68		High	High	High	High	High	High	High	High	High	High	High	High	1.27	-3.12	0	0	2.419e-05	4.446e-05	4.08	14	346	342.6	352.1	331.6	335.1	335.1	322.3	352.5	348.5	348.8
High	NADH dehydrogenase [ubiquinone] 1 alpha subcomplex subunit 5 OS=Mus musculus OX=10090 GN=Ndufa5 PE=1 SV=3	[K].WKPWEPLVEEPPANQWK.[W]	1xOxidation [P12]; 2xTMT6plex [K2; K17]; 1xTMT6plex [N-Term]	Q9CPP6 1xOxidation [P108]	0.00735791	0.000425444	1	2	2	Q9CPP6	Q9CPP6 [97-113]	0	2837.56	0					No Quan Values	High	High	High	High	High	High	High	High	High	High	n/a	High		-0.54		0.000725		0.01095	4.37
High	NADH dehydrogenase [ubiquinone] 1 alpha subcomplex subunit 8 OS=Mus musculus OX=10090 GN=Ndufa8 PE=1 SV=3	[K].TDRPLPENPYHSR.[A]	1xOxidation [P9]; 1xTMT6plex [N-Term]	Q9DCJ5 1xOxidation [P141]	0.000392991	0	1	1	2	Q9DCJ5	Q9DCJ5 [133-145]	0	1826.93	0	92.3	102.7	7.69	5.93		High	High	High	High	High	High	High	High	High	High	High	High	-1.24	-1.24	0.0001257	0	0.001358	3.436e-05	5.17	20	91.5	87.4	106.1	93	88.3	93.3	106.1	102.7	108.8	99.3
High	NADH dehydrogenase [ubiquinone] 1 alpha subcomplex subunit 8 OS=Mus musculus OX=10090 GN=Ndufa8 PE=1 SV=3	[K].SHCAEPFTEYWTCLDYSNMQLFR.[H]	2xCarbamidomethyl [C3; C13]; 2xOxidation [P6; M19]; 1xTMT6plex [N-Term]	Q9DCJ5 2xOxidation [P81; ]	0.00168334	0.000170585	1	1	4	Q9DCJ5	Q9DCJ5 [76-98]	0	3216.41	0	49.3	50.1	4.94	7.01		High	High	High	High	High	High	High	High	High	High	High	High	1.65	3.7	3.847e-05	0.002899	0.0003506	0.03754	4.43	6	44.5	51.5	48.8	48.2	49.8	48.8	46.2	50.1	54.8	53.9
High	NADH dehydrogenase [ubiquinone] 1 alpha subcomplex subunit 9, mitochondrial OS=Mus musculus OX=10090 GN=Ndufa9 PE=1 SV=2	[K].LFGLSPFEPWTTK.[D]	2xOxidation [P6; P9]; 1xTMT6plex [K13]; 1xTMT6plex [N-Term]	Q9DC69 2xOxidation [P309; P312]	0.0505741	0.00354348	1	2	4	Q9DC69	Q9DC69 [304-316]	0	2013.11	0	302.9	327.5	14.37	13.45		High	High	High	High	High	High	High	High	High	High	High	High	0.16	0.16	0.001015	0.002359	0.01574	0.03028	2.58	8	290.1	316.4	339.6	264	228	335.9	327.5	311	346.8	241
High	NADH dehydrogenase [ubiquinone] 1 beta subcomplex subunit 10 OS=Mus musculus OX=10090 GN=Ndufb10 PE=1 SV=3	[R].TPAPSPQTSLPNPITYLTK.[A]	1xDeamidated [Q/N]; 1xOxidation [P]; 1xTMT6plex [K19]; 1xTMT6plex [N-Term]	Q9DCS9 1xOxidation [P]	0.0155181	0.000745744	1	2	2	Q9DCS9	Q9DCS9 [17-35]	0	2501.39	0					No Quan Values	High	High	High	High	High	High	High	High	High	High	High	High	14.75	14.75	0.0002356	0.0002442	0.004151	0.003363	4.98	11
High	NADH dehydrogenase [ubiquinone] 1 beta subcomplex subunit 10 OS=Mus musculus OX=10090 GN=Ndufb10 PE=1 SV=3	[K].AYDLVVDWPVTLVR.[EA]	1xOxidation [P9]; 1xTMT6plex [N-Term]	Q9DCS9 1xOxidation [P44]	0.00104707	5.03951e-05	1	2	12	Q9DCS9	Q9DCS9 [36-49]	0	1891.05	0	180.1	174.6	7.65	6.29		High	High	High	High	High	High	High	High	High	High	High	High	-0.72	-0.72	5.7e-06	2.328e-05	0.0002277	0.00038	4.3	41	183.1	191.4	194.3	156.6	177.3	189.8	166.5	174.6	193	174.1
High	NADH dehydrogenase [ubiquinone] 1 beta subcomplex subunit 11, mitochondrial OS=Mus musculus OX=10090 GN=Ndufb11 PE=1 SV=2	[R].EPTMQWQEDPEPEDENVYAK.[N]	1xDeamidated [Q7]; 2xOxidation [P10; M/P]; 1xTMT6plex [K20]; 1xTMT6plex [N-Term]	O09111 2xOxidation [P57; P]	5.83136e-05	0	1	1	4	O09111	O09111 [48-67]	0	2926.33	0	108.4	108.1	6.3	6.89		High	High	High	High	High	High	High	High	High	High	High	High	14.64	14.64	0	2.328e-05	8.14e-06	0.0004392	4.01	30	109.5	96.6	107.3	101.1	114.2	114.2	104.1	119	100.3	108.1
High	NADH dehydrogenase [ubiquinone] 1 beta subcomplex subunit 11, mitochondrial OS=Mus musculus OX=10090 GN=Ndufb11 PE=1 SV=2	[R].EPTMQWQEDPEPEDENVYAK.[N]	2xOxidation [P/M]; 1xTMT6plex [K20]; 1xTMT6plex [N-Term]	O09111 2xOxidation [P]	0.000103191	0	1	1	6	O09111	O09111 [48-67]	0	2925.35	0	230.1	240.7	5.24	4.27		High	High	High	High	High	High	High	High	High	High	High	High	-1.3	-0.17	0	4.502e-05	1.976e-05	0.0005856	5.13	18	211.4	228.9	243.3	223.2	231.3	240.7	242.4	248.7	223.1	231.1
High	NADH dehydrogenase [ubiquinone] 1 beta subcomplex subunit 11, mitochondrial OS=Mus musculus OX=10090 GN=Ndufb11 PE=1 SV=2	[K].NPDFHGYDSDPVVDVWNMR.[A]	2xOxidation [P2; M18]; 1xTMT6plex [N-Term]	O09111 2xOxidation [P69; ]	0.0255839	0.00121065	1	1	2	O09111	O09111 [68-86]	0	2524.14	0					No Quan Values	High	High	High	High	High	High	High	High	High	High	High	High	1.27	1.27	0.000848	0.0003541	0.01366	0.004974	1.72	12
High	NADH dehydrogenase [ubiquinone] 1 beta subcomplex subunit 11, mitochondrial OS=Mus musculus OX=10090 GN=Ndufb11 PE=1 SV=2	[R].EPTMQWQEDPEPEDENVYAK.[N]	3xOxidation [P2; P10; M/P]; 1xTMT6plex [K20]; 1xTMT6plex [N-Term]	O09111 3xOxidation [P49; P57; P]	0.0140294	0.000629802	1	1	14	O09111	O09111 [48-67]	0	2941.34	0	1013.3	1030.4	4.36	3.88		High	High	High	High	High	High	High	High	High	High	High	High	3.37	3.37	0.0002057	0.009424	0.003709	0.1456	3.27	33	966.5	926	1003.3	1023.5	1036.6	1030.4	1063.4	1039.9	966.6	988
High	NADH dehydrogenase [ubiquinone] 1 beta subcomplex subunit 5, mitochondrial OS=Mus musculus OX=10090 GN=Ndufb5 PE=1 SV=1	[R].GDGPWYQFPTPEK.[E]	1xOxidation [P4]; 1xTMT6plex [K13]; 1xTMT6plex [N-Term]	Q9CQH3 1xOxidation [P167]	0.0406527	0.00252446	1	2	3	Q9CQH3	Q9CQH3 [164-176]	0	1996.02	0	556.4	509.3	18.05	2.75		High	High	High	High	High	High	High	High	High	High	High	High	-2.17	-2.17	0.0007304	0.001898	0.01233	0.02572	3.16	6	746.6	483.3	546.3	481.3	662.8	519.5	515.6	483.8	509.2	509.3
Medium	NADH dehydrogenase [ubiquinone] 1 beta subcomplex subunit 7 OS=Mus musculus OX=10090 GN=Ndufb7 PE=1 SV=3	[R].YLWDASVEPDPEK.[I]	1xOxidation [P9]; 1xTMT6plex [K13]; 1xTMT6plex [N-Term]	Q9CR61 1xOxidation [P17]	0.245557	0.0182778	1	1	10	Q9CR61	Q9CR61 [9-21]	0	2023.04	0	531.6	552.1	6.08	3.31		High	High	High	High	High	High	High	High	High	High	High	Medium	1.66	0.19	0.005674	0.04413	0.09532	0.4971	2.99	6	523.3	533.4	575.1	529.9	477	552.1	561.8	535.1	567	523.9
High	NADH dehydrogenase [ubiquinone] 1 beta subcomplex subunit 8, mitochondrial OS=Mus musculus OX=10090 GN=Ndufb8 PE=1 SV=1	[R].VDTSPTPVSWDVMCK.[H]	1xCarbamidomethyl [C14]; 3xOxidation [P5; P7; M13]; 1xTMT6plex [K15]; 1xTMT6plex [N-Term]	Q9D6J5 3xOxidation [P121; P123; ]	0.0359272	0.00213126	1	4	4	Q9D6J5	Q9D6J5 [117-131]	0	2228.1	0	250	254	2.99	5.98		High	High	High	High	High	High	High	High	High	High	High	High	1.61	1.61	0.0006084	0.001496	0.01068	0.02137	2.89	16	255.5	253.3	246.8	240	241.6	258.7	263.2	242.1	226.3	254
High	NADH dehydrogenase [ubiquinone] 1 beta subcomplex subunit 8, mitochondrial OS=Mus musculus OX=10090 GN=Ndufb8 PE=1 SV=1	[R].VEDYEPYPDDGMGYGDYPMLPNR.[S]	1xDeamidated [N22]; 1xOxidation [P/M]; 1xTMT6plex [N-Term]	Q9D6J5 1xOxidation [P]	0.000784248	2.60064e-05	1	4	4	Q9D6J5	Q9D6J5 [59-81]	0	2939.26	0	184.4	196.4	8.41	4.55		High	High	High	High	High	High	High	High	High	High	High	High	5.57	5.57	0	0.002117	0.000149	0.02783	4.79	43	159.1	201.7	183.3	185.6	198.1	196.5	188.8	201.1	196.4	178.8
Medium	NADH dehydrogenase [ubiquinone] 1 beta subcomplex subunit 8, mitochondrial OS=Mus musculus OX=10090 GN=Ndufb8 PE=1 SV=1	[R].DPWYQWDHSELR.[M]	1xOxidation [P2]; 1xTMT6plex [N-Term]	Q9D6J5 1xOxidation [P88]	0.266579	0.0200396	1	4	2	Q9D6J5	Q9D6J5 [87-98]	0	1876.88	0					No Quan Values	High	High	High	High	High	High	High	High	High	High	High	Medium	0.33	0.33	0.006246	0.0245	0.1047	0.2887	3.2	10
High	NADH dehydrogenase [ubiquinone] flavoprotein 1, mitochondrial OS=Mus musculus OX=10090 GN=Ndufv1 PE=1 SV=1	[K].YLVVNADEGEPGTCK.[D]	1xCarbamidomethyl [C14]; 1xOxidation [P11]; 1xTMT6plex [K15]; 1xTMT6plex [N-Term]	Q91YT0 1xOxidation [P122]	4.70219e-05	0	1	5	14	Q91YT0	Q91YT0 [112-126]	0	2126.08	0	573.9	604.9	6.4	3.55		High	High	High	High	High	High	High	High	High	High	High	High	-1.18	2.01	0	8.621e-05	6.374e-06	0.001205	4.36	14	583.2	564.7	600.9	510.7	538.5	614.6	588.4	604.9	568.7	621.5
High	NADH dehydrogenase [ubiquinone] flavoprotein 1, mitochondrial OS=Mus musculus OX=10090 GN=Ndufv1 PE=1 SV=1	[K].QIEGHTICALGDGAAWPVQGLIR.[H]	1xCarbamidomethyl [C8]; 1xOxidation [P17]; 1xTMT6plex [N-Term]	Q91YT0 1xOxidation [P434]	2.33222e-08	0	1	3	8	Q91YT0	Q91YT0 [418-440]	0	2707.42	0	346.4	340	5.92	1.97		High	High	High	High	High	High	High	High	High	High	High	High	0.13	0.13	0	0	1.378e-09	3.37e-10	7.7	51	316.7	344.4	354.7	308.9	348.4	340	336.7	343	336.4	352.9
High	NADH dehydrogenase [ubiquinone] flavoprotein 1, mitochondrial OS=Mus musculus OX=10090 GN=Ndufv1 PE=1 SV=1	[R].LKPPFPADVGVFGCPTTVANVETVAVSPTICR.[R]	2xCarbamidomethyl [C14; C31]; 1xOxidation [P]; 1xTMT6plex [K2]; 1xTMT6plex [N-Term]	Q91YT0 1xOxidation [P]	9.32388e-11	0	1	3	16	Q91YT0	Q91YT0 [225-256]	0	3874.06	0	515.9	536.8	2.52	3.35		High	High	High	High	High	High	High	High	High	High	High	High	-0.81	2.61	0	0	2.625e-12	1.989e-09	8.95	51	519	522.9	510.3	489.5	524.9	549	545.1	513.7	510.8	536.8
High	NADH dehydrogenase [ubiquinone] flavoprotein 1, mitochondrial OS=Mus musculus OX=10090 GN=Ndufv1 PE=1 SV=1	[K].HAGGVTGGWDNLLAVIPGGSSTPLIPK.[S]	2xOxidation [P17; P23]; 1xTMT6plex [K27]; 1xTMT6plex [N-Term]	Q91YT0 2xOxidation [P319; P325]	0.00179656	0.000188861	1	3	1	Q91YT0	Q91YT0 [303-329]	0	3104.71	0	141	165.6	10.6	8.8		High	High	High	High	High	High	High	High	High	High	n/a	High		-1.5		1.196e-05		0.0002107	2.61		141.6	173.1	147.2	140.4	138.1	165.8	145.5	166.1	165.6	137.2
High	NADH dehydrogenase [ubiquinone] flavoprotein 1, mitochondrial OS=Mus musculus OX=10090 GN=Ndufv1 PE=1 SV=1	[K].GPDWILGEMK.[T]	2xOxidation [P2; M9]; 1xTMT6plex [K10]; 1xTMT6plex [N-Term]	Q91YT0 2xOxidation [P73; ]	0.0279902	0.00126328	1	3	4	Q91YT0	Q91YT0 [72-81]	0	1635.88	0	273.1	287.3	4.57	5.36		High	High	High	High	High	High	High	High	High	High	High	High	0.6	0.6	0.0003927	0.0004956	0.008059	0.007313	3.07	24	254.7	268.9	287	267.1	277.3	292.3	272.3	280.2	287.3	313.3
High	NADH dehydrogenase [ubiquinone] flavoprotein 2, mitochondrial OS=Mus musculus OX=10090 GN=Ndufv2 PE=1 SV=2	[K].VAEVLQVPPMR.[V]	1xOxidation [P/M]; 1xTMT6plex [N-Term]	Q9D6J6 1xOxidation [P]	7.50739e-05	0	1	4	290	Q9D6J6	Q9D6J6 [100-110]	0	1483.85	0	15983.7	15964.1	3.88	4.08		High	High	High	High	High	High	High	High	High	High	High	High	-2.22	-0.38	0	0.0001156	0.0002008	0.001568	4.51	44	16784.4	15812.5	16483.4	14983.2	16038.1	17216	15964.1	15836.7	15476.7	16285.4
High	NADH dehydrogenase [ubiquinone] flavoprotein 2, mitochondrial OS=Mus musculus OX=10090 GN=Ndufv2 PE=1 SV=2	[R].DTPENNPDTPFDFTPENYK.[R]	1xOxidation [P15]; 1xTMT6plex [K19]; 1xTMT6plex [N-Term]	Q9D6J6 1xOxidation [P56]	0.00299464	0.000252531	1	1	2	Q9D6J6	Q9D6J6 [42-60]	0	2715.28	0	161.1	161.6	7.19	5.31		High	High	High	High	High	High	High	High	High	High	High	High	0.86	0.86	5.759e-05	0.0002188	0.0006649	0.002758	4.5	36	138.1	169.3	164.9	158	152.2	164.7	161.6	157.3	144.5	164.8
High	NADH dehydrogenase [ubiquinone] flavoprotein 2, mitochondrial OS=Mus musculus OX=10090 GN=Ndufv2 PE=1 SV=2	[K].NYPEGHQAAAVLPVLDLAQR.[Q]	1xOxidation [P3]; 1xTMT6plex [N-Term]	Q9D6J6 1xOxidation [P70]	3.06006e-09	0	1	1	2	Q9D6J6	Q9D6J6 [68-87]	0	2407.29	0	113.4	109.9	4.91	2.71		High	High	High	High	High	High	High	High	High	High	High	High	1.36	1.36	0	0	1.302e-10	2.709e-10	6.56	57	113.2	109.5	124.6	113.6	110.4	111.1	109.9	107.1	112.1	104.9
High	NADH dehydrogenase [ubiquinone] flavoprotein 2, mitochondrial OS=Mus musculus OX=10090 GN=Ndufv2 PE=1 SV=2	[R].FCCEPAGGLTSLTEPPK.[G]	2xCarbamidomethyl [C2; C3]; 1xOxidation [P]; 1xTMT6plex [K17]; 1xTMT6plex [N-Term]	Q9D6J6 1xOxidation [P]	7.37299e-07	0	1	2	27	Q9D6J6	Q9D6J6 [222-238]	0	2338.18	0	1341.3	1367.3	2.4	3.63		High	High	High	High	High	High	High	High	High	High	High	High	-2.66	-2.66	0	0	6.106e-08	2.693e-07	4.77	37	1346.1	1323.7	1383	1285.3	1336.5	1403.7	1420	1313.1	1314.4	1367.3
High	NADH dehydrogenase [ubiquinone] flavoprotein 2, mitochondrial OS=Mus musculus OX=10090 GN=Ndufv2 PE=1 SV=2	[R].FCCEPAGGLTSLTEPPKGPGFGVQAGL.[-]	2xCarbamidomethyl [C2; C3]; 1xOxidation [P5]; 1xTMT6plex [K17]; 1xTMT6plex [N-Term]	Q9D6J6 1xOxidation [P226]	0.00430009	0.000314697	1	2	3	Q9D6J6	Q9D6J6 [222-248]	1	3221.64	0	217.1	212.6	6.71	6.22		High	High	High	High	High	High	High	High	High	High	n/a	High		-0.54		4.502e-05		0.0005928	4.06		197.6	225	220	189.7	214.3	212.6	230.6	204.1	195.2	212.8
High	NADH dehydrogenase [ubiquinone] iron-sulfur protein 2, mitochondrial OS=Mus musculus OX=10090 GN=Ndufs2 PE=1 SV=1	[K].ETAHWKPPPWNDVDILK.[E]	1xDeamidated [N11]; 2xOxidation [P8; P]; 2xTMT6plex [K6; K17]; 1xTMT6plex [N-Term]	Q91WD5 2xOxidation [P64; P]	0.00395579	0.000294152	1	3	3	Q91WD5	Q91WD5 [57-73]	0	2766.51	0					No Quan Values	High	High	High	High	High	High	High	High	High	High	High	High	-1.6	-1.6	7.662e-05	0.002677	0.0008981	0.03496	3.85	18
High	NADH dehydrogenase [ubiquinone] iron-sulfur protein 2, mitochondrial OS=Mus musculus OX=10090 GN=Ndufs2 PE=1 SV=1	[R].MHAAYIRPGGVHQDLPLGLLDDIYEFSK.[N]	1xOxidation [P/M]; 1xTMT6plex [K28]; 1xTMT6plex [N-Term]	Q91WD5 1xOxidation [P]	0.000208119	0	1	2	6	Q91WD5	Q91WD5 [222-249]	0	3629.92	0	129.1	144.8	15.61	2.94		High	High	High	High	High	High	High	High	High	High	High	High	1.11	1.18	0.0001199	0	0.001181	1.626e-05	6.95	8	135.5	123	149.7	102.1	117.1	144.8	143.1	148.4	138.6	149
High	NADH dehydrogenase [ubiquinone] iron-sulfur protein 2, mitochondrial OS=Mus musculus OX=10090 GN=Ndufs2 PE=1 SV=1	[K].TQPYDVYDQVEFDVPIGSR.[G]	1xOxidation [P3]; 1xTMT6plex [N-Term]	Q91WD5 1xOxidation [P307]	0.00138458	0.000123263	1	2	2	Q91WD5	Q91WD5 [305-323]	0	2473.21	0	79.2	78.9	12.03	5.34		High	High	High	High	High	High	High	High	High	High	High	High	1.02	1.02	2.781e-05	0.0001206	0.0002799	0.001655	4.14	29	81.3	65.1	86.7	77.3	71.2	82	75.5	78.9	75.7	85.5
High	NADH dehydrogenase [ubiquinone] iron-sulfur protein 2, mitochondrial OS=Mus musculus OX=10090 GN=Ndufs2 PE=1 SV=1	[K].ETAHWKPPPWNDVDILK.[E]	1xOxidation [P7]; 2xTMT6plex [K6; K17]; 1xTMT6plex [N-Term]	Q91WD5 1xOxidation [P63]	0.00944294	0.0004817	1	3	1	Q91WD5	Q91WD5 [57-73]	0	2749.53	0					No Quan Values	High	High	High	High	High	High	High	High	High	High	n/a	High		-1.06		0.0001156		0.001514	2.07
Medium	NADH dehydrogenase [ubiquinone] iron-sulfur protein 2, mitochondrial OS=Mus musculus OX=10090 GN=Ndufs2 PE=1 SV=1	[R].QWQPDIEWAEQFSGAVMYPSK.[E]	2xOxidation [P4; M17]; 1xTMT6plex [K21]; 1xTMT6plex [N-Term]	Q91WD5 2xOxidation [P39; ]	0.453202	0.0415934	1	3	1	Q91WD5	Q91WD5 [36-56]	0	2987.46	0	60.7	60.4	5.55	10.49		Medium	Medium	Medium	Medium	Medium	Medium	Medium	Medium	Medium	Medium	n/a	Medium		1.19		0.01433		0.1994	1.92		66	65.9	57.6	61.3	60.1	72.8	57.3	56.9	60.4	63.6
High	NADH dehydrogenase [ubiquinone] iron-sulfur protein 2, mitochondrial OS=Mus musculus OX=10090 GN=Ndufs2 PE=1 SV=1	[K].ETAHWKPPPWNDVDILK.[E]	2xOxidation [P8; P]; 2xTMT6plex [K6; K17]; 1xTMT6plex [N-Term]	Q91WD5 2xOxidation [P64; P]	0.00014724	0	1	3	4	Q91WD5	Q91WD5 [57-73]	0	2765.52	0	231.2	244.9	11.57	8.93		High	High	High	High	High	High	High	High	High	High	High	High	-0.22	1.29	0	0	7.397e-05	1.079e-05	4.63	10	206.3	278.6	238.3	205.2	229.2	296.3	256.2	244.7	244.9	240.9
High	NADH dehydrogenase [ubiquinone] iron-sulfur protein 3, mitochondrial OS=Mus musculus OX=10090 GN=Ndufs3 PE=1 SV=2	[K].FDLNSPWEAFPAYR.[Q]	2xOxidation [P6; P11]; 1xTMT6plex [N-Term]	Q9DCT2 2xOxidation [P237; P242]	0.0632605	0.00449209	1	1	3	Q9DCT2	Q9DCT2 [232-245]	0	1973.96	0	133.8	137	18.9	19.81		High	High	High	High	High	High	High	High	High	High	High	High	-2.14	-2.14	0.001317	0.001895	0.02017	0.02563	2.83	2	117.9	192.6	142.6	128.2	139.6	185.9	107.4	150.3	137	136.9
High	NADH dehydrogenase [ubiquinone] iron-sulfur protein 3, mitochondrial OS=Mus musculus OX=10090 GN=Ndufs3 PE=1 SV=2	[R].KFDLNSPWEAFPAYR.[Q]	2xOxidation [P7; P12]; 1xTMT6plex [K1]; 1xTMT6plex [N-Term]	Q9DCT2 2xOxidation [P237; P242]	0.00128521	7.4751e-05	1	1	4	Q9DCT2	Q9DCT2 [231-245]	1	2331.22	0	336	352.9	4.53	4.26		High	High	High	High	High	High	High	High	High	High	High	High	1.31	1.31	4.271e-05	1.196e-05	0.0004043	0.0001409	4.81	23	319.8	328.8	347.5	338.1	333.9	338	352.9	375.4	343	362.8
High	NADH dehydrogenase [ubiquinone] iron-sulfur protein 8, mitochondrial OS=Mus musculus OX=10090 GN=Ndufs8 PE=1 SV=1	[K].LCEAICPAQAITIEAEPR.[A]	2xCarbamidomethyl [C2; C6]; 1xDeamidated [Q9]; 1xOxidation [P7]; 1xTMT6plex [N-Term]	Q8K3J1 1xOxidation [P124]	0.00961886	0.000500778	1	1	1	Q8K3J1	Q8K3J1 [118-135]	0	2288.15	0					No Quan Values	High	High	High	High	High	High	High	High	High	High	n/a	High		3.34		0.0001156		0.001542	3.18
High	NADH dehydrogenase [ubiquinone] iron-sulfur protein 8, mitochondrial OS=Mus musculus OX=10090 GN=Ndufs8 PE=1 SV=1	[K].LCEAICPAQAITIEAEPR.[A]	2xCarbamidomethyl [C2; C6]; 1xOxidation [P7]; 1xTMT6plex [N-Term]	Q8K3J1 1xOxidation [P124]	2.06424e-06	0	1	1	44	Q8K3J1	Q8K3J1 [118-135]	0	2287.16	0	1473.2	1569.3	3.16	2.93		High	High	High	High	High	High	High	High	High	High	High	High	-2.52	-0.54	0	0	2.3e-06	1.464e-05	5.2	42	1461.4	1452.5	1553.3	1461.9	1484.6	1541	1490.2	1569.3	1570.8	1614.4
High	NADH-ubiquinone oxidoreductase 75 kDa subunit, mitochondrial OS=Mus musculus OX=10090 GN=Ndufs1 PE=1 SV=2	[K].AVTEGAQAVEEPSIC.[-]	1xCarbamidomethyl [C15]; 1xOxidation [P12]; 1xTMT6plex [N-Term]	Q91VD9 1xOxidation [P724]	9.22787e-06	0	1	1	34	Q91VD9	Q91VD9 [713-727]	0	1805.88	0	1490.1	1514.7	15.07	10.74		High	High	High	High	High	High	High	High	High	High	High	High	-3.71	-0.38	0	0	1.027e-06	3.835e-05	5.08	57	1985.6	1662.3	1547.2	1335.4	1418.4	1727.1	1864.9	1499.7	1466.9	1514.7
High	NADH-ubiquinone oxidoreductase 75 kDa subunit, mitochondrial OS=Mus musculus OX=10090 GN=Ndufs1 PE=1 SV=2	[K].VDSDNLCTEEIFPTEGAGTDLR.[S]	1xCarbamidomethyl [C7]; 1xDeamidated [N5]; 1xOxidation [P13]; 1xTMT6plex [N-Term]	Q91VD9 1xOxidation [P373]	0.000860911	5.03951e-05	1	1	3	Q91VD9	Q91VD9 [361-382]	0	2685.24	0	286.8	287.3	4.26	7.29		High	High	High	High	High	High	High	High	High	High	High	High	14.76	14.76	0	2.328e-05	0.0001644	0.000387	4.22	8	308.6	276.5	291.7	278.1	282	262.7	287.3	312.9	311.4	281.7
High	NADH-ubiquinone oxidoreductase 75 kDa subunit, mitochondrial OS=Mus musculus OX=10090 GN=Ndufs1 PE=1 SV=2	[K].VDSDNLCTEEIFPTEGAGTDLR.[S]	1xCarbamidomethyl [C7]; 1xOxidation [P13]; 1xTMT6plex [N-Term]	Q91VD9 1xOxidation [P373]	2.08406e-07	0	1	1	23	Q91VD9	Q91VD9 [361-382]	0	2684.26	0	365.7	387	7.21	9.68		High	High	High	High	High	High	High	High	High	High	High	High	0.71	0.71	0	0	1.481e-08	2.159e-07	5.06	56	358.5	411.4	403	342	367.6	458.9	375.6	392.2	387	358.9
High	NADH-ubiquinone oxidoreductase 75 kDa subunit, mitochondrial OS=Mus musculus OX=10090 GN=Ndufs1 PE=1 SV=2	[K].KPMVVLGSSALQRDDGAAILVAVSNMVQK.[I]	1xDeamidated [Q12]; 2xOxidation [P2; M3]; 2xTMT6plex [K1; K29]; 1xTMT6plex [N-Term]	Q91VD9 2xOxidation [P472; ]	0.121744	0.00880793	1	1	1	Q91VD9	Q91VD9 [471-499]	1	3718.09	0					No Quan Values	High	High	High	High	High	High	High	High	High	High	High	n/a	-9.56		0.002626		0.04195			16
High	NADH-ubiquinone oxidoreductase 75 kDa subunit, mitochondrial OS=Mus musculus OX=10090 GN=Ndufs1 PE=1 SV=2	[K].LVNQEVLADPLVPPQLTIK.[D]	1xDeamidated [Q15]; 1xOxidation [P13]; 1xTMT6plex [K19]; 1xTMT6plex [N-Term]	Q91VD9 1xOxidation [P686]	1.66478e-07	0	1	2	4	Q91VD9	Q91VD9 [674-692]	0	2562.52	0	224.5	240.1	8	6.9		High	High	High	High	High	High	High	High	High	High	High	High	12.51	14.13	0	0	1.148e-08	1.635e-05	5.08	49	252.6	221.6	227.3	196.6	228.6	240.1	252.1	254.9	213.4	236
High	NADH-ubiquinone oxidoreductase 75 kDa subunit, mitochondrial OS=Mus musculus OX=10090 GN=Ndufs1 PE=1 SV=2	[K].LVNQEVLADPLVPPQLTIK.[D]	1xOxidation [P]; 1xTMT6plex [K19]; 1xTMT6plex [N-Term]	Q91VD9 1xOxidation [P]	0.00130936	7.4751e-05	1	2	2	Q91VD9	Q91VD9 [674-692]	0	2561.53	0					No Quan Values	High	High	High	High	High	High	High	High	High	High	n/a	High		0.88		1.196e-05		0.0001435	2.76
High	NADH-ubiquinone oxidoreductase 75 kDa subunit, mitochondrial OS=Mus musculus OX=10090 GN=Ndufs1 PE=1 SV=2	[K].VALIGSPVDLTYR.[Y]	1xOxidation [P7]; 1xTMT6plex [N-Term]	Q91VD9 1xOxidation [P435]	0.00658476	0.000425444	1	1	2	Q91VD9	Q91VD9 [429-441]	0	1648.95	0					No Quan Values	High	High	High	High	High	High	High	High	High	High	High	High	-0.46	-0.46	0.0001257	0.0001059	0.001582	0.001475	3.3	22
Medium	NADH-ubiquinone oxidoreductase chain 5 OS=Mus musculus OX=10090 GN=Mtnd5 PE=1 SV=3	[R].FPPLISINENDPDLMNPIK.[R]	1xDeamidated [N10]; 1xOxidation [P12]; 1xTMT6plex [K19]; 1xTMT6plex [N-Term]	P03921 1xOxidation [P448]	0.296675	0.022552	1	1	2	P03921	P03921 [437-455]	0	2642.42	0	19.3	17.6	18.45	19.86		High	High	High	High	High	High	High	High	High	High	High	High	14.47	14.47	0.009881	0.007106	0.1541	0.109	2.43	24	19.1	20.4	20.6	19.5	11.6	15.7	22.8	14.4	21.6	17.6
Medium	N-alpha-acetyltransferase 80 OS=Mus musculus OX=10090 GN=Naa80 PE=2 SV=1	[K].LTLDPARQPELTLR.[F]	1xDeamidated [Q8]; 2xOxidation [P5; P9]; 1xTMT6plex [N-Term]	Q9R123 2xOxidation [P16; P20]	0.466622	0.0436732	1	2	1	Q9R123	Q9R123 [12-25]	1	1885.06	0	213.6	204.7	10.78	12.13		Medium	Medium	Medium	Medium	Medium	Medium	Medium	Medium	Medium	Medium	n/a	Medium		6.45		0.01521		0.2074	2.87		213.1	174.5	214	176.6	216.4	183.9	244.7	207.3	183.9	204.7
High	Nascent polypeptide-associated complex subunit alpha, muscle-specific form OS=Mus musculus OX=10090 GN=Naca PE=1 SV=2	[K].QFPAPPASATLGVPVSPLPATEGLK.[N]	5xOxidation [P3; P5; P6; P14; P17]; 1xTMT6plex [K25]; 1xTMT6plex [N-Term]	P70670 5xOxidation [P457; P459; P460; P468; P471]	0.0176373	0.000799344	1	1	2	P70670	P70670 [455-479]	0	2983.64	0	121.9	207.7	23.2	24.63		High	High	High	High	High	High	High	High	High	High	High	n/a	-0.75		0.0002427		0.00479			12	124.3	189.5	147.3	102.3	118.6	233.5	207.7	207.7	126.4	264.4
High	Natriuretic peptides A OS=Mus musculus OX=10090 GN=Nppa PE=1 SV=2	[K].MPVEDEVMPPQALSEQTEEAGAALSSLPEVPPWTGEVNPPLR.[D]	2xOxidation [P/M]; 1xTMT6plex [N-Term]	P05125 2xOxidation [P]	7.10482e-09	0	1	1	28	P05125	P05125 [50-91]	0	4759.33	0	182.6	203	13.87	13.48		High	High	High	High	High	High	High	High	High	High	High	High	-4.25	2.03	0	1.196e-05	4.811e-07	0.0001214	7.35	28	224.8	181	205.9	156.8	162.7	209.7	193.4	152.5	203	221.6
High	Natriuretic peptides A OS=Mus musculus OX=10090 GN=Nppa PE=1 SV=2	[K].MPVEDEVMPPQALSEQTEEAGAALSSLPEVPPWTGEVNPPLR.[D]	3xOxidation [P31; P/M]; 1xTMT6plex [N-Term]	P05125 3xOxidation [P80; P]	4.12481e-05	0	1	1	8	P05125	P05125 [50-91]	0	4775.33	0	65.3	80.2	15.45	15.91		High	High	High	High	High	High	High	High	High	High	High	High	-1.09	3.43	0	9.038e-05	5.503e-06	0.001386	5.35	28	80.5	58.7	77.9	56.6	60	80.2	80.7	53.9	73.8	82.4
Medium	Nephrin OS=Mus musculus OX=10090 GN=Nphs1 PE=1 SV=2	[K].LSQAGAYQCIVDNGVAPAAR.[G]	1xCarbamidomethyl [C9]; 1xDeamidated [N13]; 1xOxidation [P17]; 1xTMT6plex [N-Term]	Q9QZS7 1xOxidation [P838]	0.412016	0.0358705	1	2	1	Q9QZS7	Q9QZS7 [822-841]	0	2307.16	0					No Quan Values	Medium	Medium	Medium	Medium	Medium	Medium	Medium	Medium	Medium	Medium	n/a	Medium		3.48		0.01157		0.1745	2.45
Medium	Nesprin-1 OS=Mus musculus OX=10090 GN=Syne1 PE=1 SV=2	[K].LGESLEPSR.[S]	1xOxidation [P7]; 1xTMT6plex [N-Term]	Q6ZWR6 1xOxidation [P6001]	0.302588	0.0231722	1	3	1	Q6ZWR6	Q6ZWR6 [5995-6003]	0	1232.67	0					No Quan Values	High	High	High	High	High	High	High	High	High	High	High	Low	0.92	6.64	0.007333	0.7383	0.1209	1	1.5	13
High	Nesprin-4 (Fragment) OS=Mus musculus OX=10090 GN=Syne4 PE=4 SV=1	[K].RTPYLVLSYVNGLPPI.[-]	3xOxidation [P3; P14; P15]; 1xTMT6plex [N-Term]	H3BKW7 3xOxidation [P66; P77; P78]	0.0616586	0.0044688	1	1	1	H3BKW7	H3BKW7 [64-79]	1	2079.17	0	179.4	215.8	82.16	43.31		High	High	High	High	High	High	High	High	High	High	n/a	High		-1.57		0.0009937		0.0144	3.04		117.3	109.5	185.7	626.3	210	336.1	215.3	215.8	146.8	442.6
Medium	Neural cell adhesion molecule 1 OS=Mus musculus OX=10090 GN=Ncam1 PE=1 SV=3	[K].ASPAPTPTPAGAASPLAAVAAPATDAPQAK.[Q]	1xOxidation [P5]; 1xTMT6plex [K30]; 1xTMT6plex [N-Term]	P13595 1xOxidation [P949]	0.229016	0.016949	1	2	1	P13595	P13595 [945-974]	0	3142.71	0	4.2	3.7	30.59	13.32		Not Found	Not Found	High	High	High	Not Found	High	High	High	High	n/a	High		14.72		0.005307		0.07655	1.82				3.3	4.4	4		4.1	3.2	3.4	4.1
Medium	Neurotrophin receptor-interacting factor 2 OS=Mus musculus OX=10090 GN=Nrif2 PE=1 SV=1	[K].QILELLVLEQFLNALPEKLR.[V]	3xDeamidated [Q1; Q10; N13]; 1xOxidation [P16]; 1xTMT6plex [K18]; 1xTMT6plex [N-Term]	Q921B4 1xOxidation [P214]	0.325024	0.0252483	1	4	2	Q921B4	Q921B4 [199-218]	1	2856.67	0	126.2	133.7	3.57	6.97		High	High	High	High	High	High	High	High	High	High	High	Medium	3.71	3.71	0.008082	0.04575	0.1311	0.5152	2.26	35	123.1	130.3	126.7	117.3	127.3	123.4	136.4	116.9	133.7	137.6
High	Nodal modulator 1 OS=Mus musculus OX=10090 GN=Nomo1 PE=1 SV=1	[K].IEPPLGWSFEPTNVELR.[V]	2xOxidation [P3; P4]; 1xTMT6plex [N-Term]	Q6GQT9 2xOxidation [P86; P87]	0.0368939	0.00216608	1	1	2	Q6GQT9	Q6GQT9 [84-100]	0	2245.17	0	17.5	20.7	18.89	22.59		High	High	High	High	High	High	High	High	High	High	High	High	0.2	0.2	0.000633	0.0007425	0.01106	0.01109	3.01	10	18	23.2	18.8	14.3	14.2	23.9	12.4	20.7	22	18.5
Medium	Nuclear factor of activated T-cells 5 OS=Mus musculus OX=10090 GN=Nfat5 PE=1 SV=2	[K].IVVQPETQHR.[A]	2xDeamidated [Q4; Q8]; 1xOxidation [P5]; 1xTMT6plex [N-Term]	Q9WV30 1xOxidation [P288]	0.43485	0.0390111	1	1	1	Q9WV30	Q9WV30 [284-293]	0	1453.78	0					No Quan Values	Medium	Medium	Medium	Medium	Medium	Medium	Medium	Medium	Medium	Medium	Medium	Low	10.6	10.6	0.01253	0.1715	0.1819	1	1.86	0
Medium	Nuclear receptor co-repressor 1, isoform CRA_a OS=Mus musculus OX=10090 GN=Ncor1 PE=1 SV=1	[R].EWEVLQPAPHQVITNLPEGVR.[L]	3xOxidation [P7; P9; P17]; 1xTMT6plex [N-Term]	Q5RIM6 3xOxidation [P1022; P1024; P1032]	0.440041	0.0397292	1	5	1	Q5RIM6	Q5RIM6 [1016-1036]	0	2689.41	0	109.9	107.6	10.85	9.44		Medium	Medium	Medium	Medium	Medium	Medium	Medium	Medium	Medium	Medium	n/a	Medium		-2.21		0.01329		0.1907	3.14		96.6	109.8	110	86.6	116.4	95	107.3	114.2	107.6	123.2
Medium	Nucleoredoxin OS=Mus musculus OX=10090 GN=Nxn PE=1 SV=1	[K].QLIQPIAEK.[I]	2xDeamidated [Q1; Q4]; 1xOxidation [P5]; 1xTMT6plex [K9]; 1xTMT6plex [N-Term]	P97346 1xOxidation [P350]	0.485836	0.0461897	1	2	1	P97346	P97346 [346-354]	0	1515.9	0	4	2.9	21.08	29.43		Not Found	Medium	Medium	Medium	Medium	Not Found	Medium	Medium	Medium	Not Found	n/a	Medium		0.4		0.01652		0.2193	1.64			4	3.5	4.2	5.4		2.9	4.1	2.3
High	Nucleoside diphosphate kinase OS=Mus musculus OX=10090 GN=Gm20390 PE=3 SV=1	[K].EIHLWFKPEELIDYK.[S]	1xOxidation [P8]; 2xTMT6plex [K7; K15]; 1xTMT6plex [N-Term]	E9PZF0 1xOxidation [P251]	0.000663	0	1	2	8	E9PZF0	E9PZF0 [244-258]	0	2663.51	0	239	241	7.09	3.32		High	High	High	High	High	High	High	High	High	High	High	High	0.25	-0.88	2.781e-05	0	0.0003058	6.432e-05	5.39	10	239.2	238.8	264	227.1	218.4	234.2	243.7	250.9	241	230.6
High	Ogdhl protein OS=Mus musculus OX=10090 GN=Ogdhl PE=1 SV=1 2-oxoglutarate dehydrogenase, mitochondrial OS=Mus musculus OX=10090 GN=Ogdh PE=1 SV=3	[R].SSPYPTDVAR.[V]	1xOxidation [P]; 1xTMT6plex [N-Term]	B2RXT3 1xOxidation [P]; Q60597 1xOxidation [P]	0.0627223	0.00449209	2	7	4	B2RXT3; Q60597	B2RXT3 [444-453]; Q60597 [457-466]	0	1337.69	0	187.6	186.3	5.91	5.52	Shared	High	High	High	High	High	High	High	High	High	High	High	High	0.13	0.13	0.00131	0.001921	0.01999	0.02599	3.25	27	186.4	177.3	192.8	168.1	188.9	192.5	206.4	183.1	186.3	179.9
Medium	Osteoclast-stimulating factor 1 OS=Mus musculus OX=10090 GN=Ostf1 PE=1 SV=2	[K].GRTGLIPSNYVAEQAESIDNPLHEAAK.[R]	1xOxidation [P7]; 1xTMT6plex [K27]; 1xTMT6plex [N-Term]	Q62422 1xOxidation [P62]	0.306579	0.023488	1	1	1	Q62422	Q62422 [56-82]	1	3354.77	0	79.2	84.7	12.68	13.25		High	High	High	High	High	High	High	High	High	High	High	Low	12.2	12.2	0.007518	0.0595	0.1231	0.6586	3.47	4	77.3	78.9	79.5	100.5	83.9	84.7	91.9	90	67	73.4
Medium	Partitioning defective 6 homolog alpha OS=Mus musculus OX=10090 GN=Pard6a PE=1 SV=2	[R].ALASGPPPLR.[L]	2xOxidation [P6; P8]; 1xTMT6plex [N-Term]	Q9Z101 2xOxidation [P85; P87]	0.285106	0.021761	1	1	1	Q9Z101	Q9Z101 [80-89]	0	1239.73	0	13.3	13.7	21.9	7.07		High	High	High	High	High	High	High	High	High	High	High	Low	7.86	7.86	0.006835	0.1122	0.1129	0.9768	2.11	14	13.2	8.2	14.5	9.8	14.8	13.7	13.5	15.2	13	15.1
High	Partitioning defective 6 homolog gamma OS=Mus musculus OX=10090 GN=Pard6g PE=2 SV=1	[K].AVSSANPLLR.[V]	1xOxidation [P7]; 1xTMT6plex [N-Term]	Q9JK84 1xOxidation [P89]	0.0231657	0.00107996	1	1	1	Q9JK84	Q9JK84 [83-92]	0	1272.75	0	134.1	128.6	4.7	6.58		High	High	High	High	High	High	High	High	High	High	High	Low	8.21	8.21	0.0003176	0.05339	0.006517	0.5976	2.73	12	125.7	138.1	140.1	135.1	133.2	128.6	133	128.5	146.6	124
Medium	Patatin-like phospholipase domain-containing protein 2 OS=Mus musculus OX=10090 GN=Pnpla2 PE=1 SV=1	[K].TLPADCHER.[A]	1xCarbamidomethyl [C6]; 1xOxidation [P3]; 1xTMT6plex [N-Term]	Q8BJ56 1xOxidation [P103]	0.210301	0.015292	1	5	2	Q8BJ56	Q8BJ56 [101-109]	0	1343.66	0					No Quan Values	High	High	High	High	High	High	High	High	High	High	High	High	0.06	0.06	0.0046	0.006013	0.07908	0.08833	2.49	10
Medium	Pecanex-like protein 2 OS=Mus musculus OX=10090 GN=Pcnx2 PE=2 SV=2	[R].SESGLVNPGALK.[K]	1xDeamidated [N7]; 1xOxidation [P8]; 1xTMT6plex [K12]; 1xTMT6plex [N-Term]	Q5DU28 1xOxidation [P250]	0.259427	0.019543	1	2	2	Q5DU28	Q5DU28 [243-254]	0	1646.94	0	363.5	456	16.91	56.47		High	High	High	High	High	High	High	High	High	High	n/a	High		-0.67		0.006124		0.091	2.34		330.8	500.4	390.4	329.2	379.2	456	310.7	327.1	466.6	1022.5
Medium	Peptidyl-prolyl cis-trans isomerase FKBP7 OS=Mus musculus OX=10090 GN=Fkbp7 PE=1 SV=1	[K].VIIPPSFAYGK.[E]	2xOxidation [P4; P5]; 1xTMT6plex [K11]; 1xTMT6plex [N-Term]	O54998 2xOxidation [P110; P111]	0.404597	0.0350034	1	1	1	O54998	O54998 [107-117]	0	1681.99	0	9	10.6	28.16	11.72		Medium	Medium	Medium	Medium	Medium	Medium	Medium	Medium	Medium	Medium	Medium	n/a	9.86		0.01125		0.1687			3	10.4	5.6	7.5	7.7	10.9	12.7	9.7	10.6	10.2	12.1
High	Peroxiredoxin-1 OS=Mus musculus OX=10090 GN=Prdx1 PE=1 SV=1	[K].KQGGLGPMNIPLISDPK.[R]	1xOxidation [P/M]; 2xTMT6plex [K1; K17]; 1xTMT6plex [N-Term]	P35700 1xOxidation [P]	2.78558e-07	0	1	4	11	P35700	P35700 [93-109]	1	2468.45	0	476.3	504.5	7.31	2.33		High	High	High	High	High	High	High	High	High	High	High	High	-3.68	-3.68	0	0	7.083e-08	8.971e-08	4.74	22	471	481.7	533.9	461.7	466	491.7	504.5	516.2	493	515.5
High	Peroxiredoxin-2 OS=Mus musculus OX=10090 GN=Prdx2 PE=1 SV=3	[R].LVQAFQYTDEHGEVCPAGWKPGSDTIKPNVDDSK.[E]	1xCarbamidomethyl [C15]; 1xDeamidated [N29]; 2xOxidation [P16; P]; 3xTMT6plex [K20; K27; K34]; 1xTMT6plex [N-Term]	Q61171 2xOxidation [P173; P]	5.88967e-07	0	1	1	2	Q61171	Q61171 [158-191]	0	4738.41	0					No Quan Values	High	High	High	High	High	High	High	High	High	High	High	High	2.92	2.92	0	0	4.706e-08	8.345e-08	6.38	39
High	Peroxiredoxin-2 OS=Mus musculus OX=10090 GN=Prdx2 PE=1 SV=3	[R].LVQAFQYTDEHGEVCPAGWKPGSDTIKPNVDDSK.[E]	1xCarbamidomethyl [C15]; 1xDeamidated [N29]; 3xOxidation [P16; P21; P28]; 3xTMT6plex [K20; K27; K34]; 1xTMT6plex [N-Term]	Q61171 3xOxidation [P173; P178; P185]	3.79164e-05	0	1	1	2	Q61171	Q61171 [158-191]	0	4754.41	0	93	96	4.95	11.54		High	High	High	High	High	High	High	High	High	High	High	High	3.11	3.11	0	1.196e-05	5.024e-06	0.0001388	3.04	13	96	92.3	91.2	84.5	93.8	92.7	92.4	104.7	120.1	96
High	Peroxiredoxin-2 OS=Mus musculus OX=10090 GN=Prdx2 PE=1 SV=3	[R].LVQAFQYTDEHGEVCPAGWKPGSDTIKPNVDDSK.[E]	1xCarbamidomethyl [C15]; 1xOxidation [P16]; 3xTMT6plex [K20; K27; K34]; 1xTMT6plex [N-Term]	Q61171 1xOxidation [P173]	3.75749e-06	0	1	1	4	Q61171	Q61171 [158-191]	0	4721.43	0	172.7	193.9	9.87	0.8		High	High	High	High	High	High	High	High	High	High	High	High	2.45	2.94	0	0	3.758e-07	4.212e-06	6.49	24	194.3	177.4	168.2	161.7	159.9	193.1	193.3	196.4	193.9	196.1
High	Peroxiredoxin-2 OS=Mus musculus OX=10090 GN=Prdx2 PE=1 SV=3	[R].LVQAFQYTDEHGEVCPAGWKPGSDTIKPNVDDSK.[E]	1xCarbamidomethyl [C15]; 2xOxidation [P16; P21]; 3xTMT6plex [K20; K27; K34]; 1xTMT6plex [N-Term]	Q61171 2xOxidation [P173; P178]	3.23492e-06	0	1	1	2	Q61171	Q61171 [158-191]	0	4737.43	0	88.6	89.8	5.69	4.31		High	High	High	High	High	High	High	High	High	High	High	High	-0.3	-0.3	0	0	5.155e-07	1.158e-07	5.94	27	87.9	89.2	95.7	80.3	87.4	89.8	89.2	86.3	90.8	96.9
High	Peroxiredoxin-6 OS=Mus musculus OX=10090 GN=Prdx6 PE=1 SV=1 Peroxiredoxin-6 OS=Mus musculus OX=10090 GN=Prdx6 PE=1 SV=3	[R].VVDSLQLTGTKPVATPVDWK.[K]	1xDeamidated [Q6]; 1xOxidation [P12]; 2xTMT6plex [K11; K20]; 1xTMT6plex [N-Term]	Q6GT24 1xOxidation [P174]; O08709 1xOxidation [P174]	0.061133	0.00445504	2	3	1	Q6GT24; O08709	Q6GT24 [163-182]; O08709 [163-182]	0	2858.65	0					No Quan Values	High	High	High	High	High	High	High	High	High	High	n/a	High		12.14		0.0009767		0.01421	4.61
High	Peroxiredoxin-6 OS=Mus musculus OX=10090 GN=Prdx6 PE=1 SV=1 Peroxiredoxin-6 OS=Mus musculus OX=10090 GN=Prdx6 PE=1 SV=3	[R].VVDSLQLTGTKPVATPVDWK.[K]	1xOxidation [P16]; 2xTMT6plex [K11; K20]; 1xTMT6plex [N-Term]	Q6GT24 1xOxidation [P178]; O08709 1xOxidation [P178]	0.00442137	0.000314697	2	3	1	Q6GT24; O08709	Q6GT24 [163-182]; O08709 [163-182]	0	2857.66	0					No Quan Values	High	High	High	High	High	High	High	High	High	High	n/a	High		-3.03		4.502e-05		0.0006139	3.82
High	Peroxiredoxin-6 OS=Mus musculus OX=10090 GN=Prdx6 PE=1 SV=1 Peroxiredoxin-6 OS=Mus musculus OX=10090 GN=Prdx6 PE=1 SV=3	[R].VVDSLQLTGTKPVATPVDWK.[K]	2xOxidation [P12; P16]; 2xTMT6plex [K11; K20]; 1xTMT6plex [N-Term]	Q6GT24 2xOxidation [P174; P178]; O08709 2xOxidation [P174; P178]	1.03247e-05	0	2	3	8	Q6GT24; O08709	Q6GT24 [163-182]; O08709 [163-182]	0	2873.66	0	764.6	737.7	7.21	5.47	Shared	High	High	High	High	High	High	High	High	High	High	High	High	-2.16	0.08	0	0	3.971e-06	1.355e-05	4.82	7	773.4	647	776.2	698.8	773.6	687.3	693.8	780	756.5	737.7
High	Phosphate carrier protein, mitochondrial OS=Mus musculus OX=10090 GN=Slc25a3 PE=1 SV=1	[R].IQTQPGYANTLR.[E]	1xOxidation [P5]; 1xTMT6plex [N-Term]	Q8VEM8 1xOxidation [P189]	0.0328748	0.00188129	1	2	8	Q8VEM8	Q8VEM8 [185-196]	0	1606.88	0	459.9	503.3	9.07	2.91		High	High	High	High	High	High	High	High	High	High	High	High	0.04	-0.75	0.002705	0.0004757	0.04359	0.006669	3.91	10	433.4	552.3	457.3	443.6	462.5	502	506.9	477.1	516.3	503.3
High	Phosphatidylethanolamine-binding protein 1 OS=Mus musculus OX=10090 GN=Pebp1 PE=1 SV=3	[R].YVWLVYEQEQPLSCDEPILSNK.[S]	1xCarbamidomethyl [C14]; 1xOxidation [P]; 1xTMT6plex [K22]; 1xTMT6plex [N-Term]	P70296 1xOxidation [P]	5.83359e-06	0	1	2	10	P70296	P70296 [120-141]	0	3184.63	0	262.8	274.1	9.68	7.58		High	High	High	High	High	High	High	High	High	High	High	High	-1.6	-1.6	0	0	6.166e-07	1.38e-06	5.38	45	264.1	242.4	303.4	261.6	254.4	251	273.4	283.1	309.4	274.1
High	Phosphatidylethanolamine-binding protein 1 OS=Mus musculus OX=10090 GN=Pebp1 PE=1 SV=3	[K].VLTPTQVMNRPSSISWDGLDPGK.[L]	2xOxidation [P/M]; 1xTMT6plex [K23]; 1xTMT6plex [N-Term]	P70296 2xOxidation [P]	0.0346754	0.00208105	1	3	3	P70296	P70296 [40-62]	0	2988.59	0	134.9	161.9	17.11	4.35		High	High	High	High	High	High	High	High	High	High	High	High	0.31	0.31	0.0005886	0.002397	0.01031	0.03087	3.85	4	135.4	122.9	167	123.9	134.5	156.1	170.7	161.9	172.5	159.6
High	Phosphatidylethanolamine-binding protein 1 OS=Mus musculus OX=10090 GN=Pebp1 PE=1 SV=3	[K].VLTPTQVMNRPSSISWDGLDPGK.[L]	3xOxidation [P4; M8; P11]; 1xTMT6plex [K23]; 1xTMT6plex [N-Term]	P70296 3xOxidation [P43; P50; ]	0.0139012	0.000629802	1	3	4	P70296	P70296 [40-62]	0	3004.58	0	336	340.5	11.4	10.82		High	High	High	High	High	High	High	High	High	High	High	High	0.82	-0.12	0.0002015	0.001034	0.00365	0.01515	3.9	6	321.3	306.8	351.3	307.1	351.3	306.6	340.5	327.4	393.4	387.6
High	Phosphoglucomutase-1 OS=Mus musculus OX=10090 GN=Pgm1 PE=1 SV=4	[R].LVIGQNGILSTPAVSCIIR.[K]	1xCarbamidomethyl [C16]; 1xDeamidated [N6]; 1xOxidation [P12]; 1xTMT6plex [N-Term]	Q9D0F9 1xOxidation [P97]	3.9375e-06	0	1	2	7	Q9D0F9	Q9D0F9 [86-104]	0	2257.28	0	179.1	180.1	3.2	6.67		High	High	High	High	High	High	High	High	High	High	High	High	0.51	0.51	0	0	5.079e-07	1.357e-05	4.23	42	169.4	178.1	181.9	180.1	170.6	163.8	168.6	180.1	191.6	187.3
High	Phosphoglucomutase-1 OS=Mus musculus OX=10090 GN=Pgm1 PE=1 SV=4	[K].TIEEYAICPDLK.[V]	1xCarbamidomethyl [C8]; 1xOxidation [P9]; 1xTMT6plex [K12]; 1xTMT6plex [N-Term]	Q9D0F9 1xOxidation [P161]	0.0163941	0.000783181	1	2	5	Q9D0F9	Q9D0F9 [153-164]	0	1926.03	0	109.9	119.8	5.45	4.91		High	High	High	High	High	High	High	High	High	High	High	High	1.04	1.04	0.0002398	0.0005816	0.004432	0.008541	3.15	22	109.5	108.3	124.3	114.4	108.7	113.5	121.4	111.5	119.8	125.7
High	Phosphoglycerate kinase 1 OS=Mus musculus OX=10090 GN=Pgk1 PE=1 SV=4	[K].TGQATVASGIPAGWMGLDCGTESSK.[K]	1xCarbamidomethyl [C19]; 2xOxidation [P11; M15]; 1xTMT6plex [K25]; 1xTMT6plex [N-Term]	P09411 2xOxidation [P308; ]	2.97476e-08	0	1	1	2	P09411	P09411 [298-322]	0	2971.45	0	87.2	82	5.94	10.04		High	High	High	High	High	High	High	High	High	High	High	High	-2.06	-2.06	0	0	1.663e-09	4.937e-08	5.56	52	82.4	95	88.1	92	81.9	82	86.8	89.4	68.2	81.6
High	Phosphoglycerate kinase 1 OS=Mus musculus OX=10090 GN=Pgk1 PE=1 SV=4	[K].QIVWNGPVGVFEWEAFAR.[G]	1xDeamidated [N5]; 1xOxidation [P7]; 1xTMT6plex [N-Term]	P09411 1xOxidation [P339]	0.000592743	0	1	1	2	P09411	P09411 [333-350]	0	2351.2	0	13.2	11.6	17.43	8.31		High	High	High	High	High	High	High	High	High	High	High	High	-0.12	-0.12	0	1.78e-05	0.0001087	0.0003784	2.58	6	14.2	9.9	16.1	14.1	11.2	10.4	11.6	13.1	11.8	11.5
High	Phosphoglycerate kinase 1 OS=Mus musculus OX=10090 GN=Pgk1 PE=1 SV=4	[K].ITLPVDFVTADKFDENAK.[T]	1xOxidation [P4]; 2xTMT6plex [K12; K18]; 1xTMT6plex [N-Term]	P09411 1xOxidation [P283]	0.0238025	0.00107996	1	1	1	P09411	P09411 [280-297]	1	2726.52	0					No Quan Values	High	High	High	High	High	High	High	High	High	High	n/a	High		6.01		0.0003281		0.004544	2.35
High	Phosphoglycerate kinase 1 OS=Mus musculus OX=10090 GN=Pgk1 PE=1 SV=4	[K].DCVGPEVENACANPAAGTVILLENLR.[F]	2xCarbamidomethyl [C2; C11]; 1xDeamidated [N]; 1xOxidation [P]; 1xTMT6plex [N-Term]	P09411 1xOxidation [P]	2.22603e-09	0	1	2	8	P09411	P09411 [98-123]	0	3028.49	0	113.5	112.5	2.84	10.03		High	High	High	High	High	High	High	High	High	High	High	High	1.25	7.99	0	0	4.24e-07	1.723e-09	7.24	56	117.7	113.5	113.5	109.8	111.7	118.8	101.1	101.6	127.3	112.5
High	Phosphoglycerate kinase 1 OS=Mus musculus OX=10090 GN=Pgk1 PE=1 SV=4	[K].DCVGPEVENACANPAAGTVILLENLR.[F]	2xCarbamidomethyl [C2; C11]; 1xOxidation [P]; 1xTMT6plex [N-Term]	P09411 1xOxidation [P]	1.51662e-09	0	1	2	20	P09411	P09411 [98-123]	0	3027.51	0	492.4	510.4	5.21	7.54		High	High	High	High	High	High	High	High	High	High	High	High	-2.02	0.87	0	0	9.439e-11	8.541e-08	8.08	72	486.3	498.6	520.2	444.5	500.1	553.6	483.8	458.5	510.4	535.4
High	Phosphoglycerate mutase 2 OS=Mus musculus OX=10090 GN=Pgam2 PE=1 SV=3	[R].YAGLKPEELPTCESLK.[D]	1xCarbamidomethyl [C12]; 1xOxidation [P10]; 2xTMT6plex [K5; K16]; 1xTMT6plex [N-Term]	O70250 1xOxidation [P151]	0.00822123	0.000443878	1	1	32	O70250	O70250 [142-157]	0	2538.41	0	3200.9	3117.5	7.11	4.02		High	High	High	High	High	High	High	High	High	High	High	High	-0.4	-0.4	0.0001434	0.0004107	0.002034	0.005832	4.54	9	3088.2	2796.5	3330.2	3075.8	3317.7	3069.4	3117.5	3350.5	3205.5	3033.2
High	Phosphoglycerate mutase 2 OS=Mus musculus OX=10090 GN=Pgam2 PE=1 SV=3	[R].ALPFWNEEIAPK.[I]	1xOxidation [P3]; 1xTMT6plex [K12]; 1xTMT6plex [N-Term]	O70250 1xOxidation [P165]	0.00128521	7.4751e-05	1	1	18	O70250	O70250 [163-174]	0	1889.06	0	484.4	487.1	4.58	3.31		High	High	High	High	High	High	High	High	High	High	High	High	-1.37	-1.37	1.127e-05	1.78e-05	0.0002593	0.0003668	4.66	46	463.2	444.9	502.6	476	494.3	455.6	497.6	481.4	489.4	487.1
Medium	Phosphorylase b kinase gamma catalytic chain, skeletal muscle/heart isoform OS=Mus musculus OX=10090 GN=Phkg1 PE=1 SV=3	[K].VSGHPNIIQLK.[D]	2xDeamidated [N6; Q9]; 1xOxidation [P5]; 1xTMT6plex [K11]; 1xTMT6plex [N-Term]	P07934 1xOxidation [P85]	0.20433	0.0148458	1	2	2	P07934	P07934 [81-91]	0	1681.99	0	10.6	13.7	29.53	27.42		High	High	High	High	High	High	High	High	High	High	High	Medium	3.84	3.84	0.00451	0.02873	0.07693	0.3298	1.58	32	10	7.9	15.9	9.2	15.9	13.7	11.5	22	14.7	12.9
High	Phytanoyl-CoA dioxygenase domain-containing protein 1 OS=Mus musculus OX=10090 GN=Phyhd1 PE=1 SV=2	[R].APSDSGPGTSFLGSDPAWASNLFVPLPVR.[R]	2xOxidation [P7; P16]; 1xTMT6plex [N-Term]	Q9DB26 2xOxidation [P211; P220]	0.0497038	0.00347567	1	5	2	Q9DB26	Q9DB26 [205-233]	0	3203.62	0	9.3	8.5	24.66	9.82		High	High	High	High	High	High	High	High	High	High	High	High	-2.62	-2.62	0.001086	0.0007469	0.01653	0.01111	2.41	10	7.4	14.5	11.2	8.8	10	8.4	9.1	7.8	10.1	8.5
High	Platelet glycoprotein 4 OS=Mus musculus OX=10090 GN=Cd36 PE=1 SV=2	[R].FVLPANAFASPLQNPDNHCFCTEK.[V]	2xCarbamidomethyl [C19; C21]; 1xOxidation [P]; 1xTMT6plex [K24]; 1xTMT6plex [N-Term]	Q08857 1xOxidation [P]	7.10207e-07	0	1	1	11	Q08857	Q08857 [293-316]	0	3251.6	0	448.2	412.9	10.61	9.04		High	High	High	High	High	High	High	High	High	High	High	High	3.13	-1.41	0	0	2e-06	1.07e-06	5.17	2	479.7	447.8	514.4	399.1	389.6	412.9	392.3	391.3	462.6	471.6
Medium	Pleckstrin homology domain-containing family A member 4 (Fragment) OS=Mus musculus OX=10090 GN=Plekha4 PE=4 SV=1	[R].LLLLPQGSHAK.[A]	1xDeamidated [Q6]; 1xOxidation [P5]; 1xTMT6plex [K11]; 1xTMT6plex [N-Term]	A0A1B0GS55 1xOxidation [P67]	0.424595	0.0374702	1	1	5	A0A1B0GS55	A0A1B0GS55 [63-73]	0	1652.01	0	172.3	153.2	6.12	9.36		Medium	Medium	Medium	Medium	Medium	Medium	Medium	Medium	Medium	Medium	n/a	Medium		1.73		0.0123		0.1816	2.65		177.1	153.8	167.5	178.4	178.7	144	153.2	157.3	180.2	145.4
Medium	Potassium-transporting ATPase alpha chain 2 OS=Mus musculus OX=10090 GN=Atp12a PE=1 SV=3	[R].AAELLARDGPNALTPPK.[Q]	1xDeamidated [N11]; 1xOxidation [P16]; 1xTMT6plex [K17]; 1xTMT6plex [N-Term]	Q9Z1W8 1xOxidation [P95]	0.175099	0.0125789	1	1	2	Q9Z1W8	Q9Z1W8 [80-96]	1	2209.26	0	21.8	27.2	17.98	11.16		High	High	High	High	High	High	High	High	High	High	High	Medium	-8.94	-8.94	0.00381	0.02917	0.06407	0.3336	2.45	5	19.3	24.7	26.5	16	23.5	30	27.2	28.6	23.5	23.5
Medium	Predicted gene, 39566 OS=Mus musculus OX=10090 GN=Gm39566 PE=4 SV=1	[R].SPAAIQDAGVLR.[S]	1xDeamidated [Q6]; 1xOxidation [P2]; 1xTMT6plex [N-Term]	A0A1B0GT45 1xOxidation [P801]	0.177732	0.0127321	1	1	9	A0A1B0GT45	A0A1B0GT45 [800-811]	0	1443.8	0	2049.3	2043.7	4.68	4.12		High	High	High	High	High	High	High	High	High	High	n/a	High		-1.23		0.003996		0.05408	3.21		2100	1971.4	2160.9	1999.8	2186.2	1930.8	2064.9	2043.7	2005	2160.3
High	Probable G-protein coupled receptor 158 OS=Mus musculus OX=10090 GN=Gpr158 PE=1 SV=2	[K].QHGQQLPR.[A]	2xDeamidated [Q1; Q4]; 1xOxidation [P7]; 1xTMT6plex [N-Term]	Q8C419 1xOxidation [P50]	0.0471761	0.00328824	1	1	6	Q8C419	Q8C419 [44-51]	0	1210.64	0	35.2	38.7	12.51	12.61		High	High	High	High	High	High	High	High	High	High	High	High	-9.93	-10.35	0.000924	0.008134	0.01458	0.125	1.82	6	36.3	26.9	33.5	39.8	36.3	30.6	31.8	38.7	40.5	38.9
Medium	Prohibitin OS=Mus musculus OX=10090 GN=Phb PE=1 SV=1	[R].NITYLPAGQSVLLQLPQ.[-]	1xOxidation [P6]; 1xTMT6plex [N-Term]	P67778 1xOxidation [P261]	0.306579	0.023488	1	1	1	P67778	P67778 [256-272]	0	2100.19	0					No Quan Values	High	High	High	High	High	High	High	High	High	High	n/a	High		2.94		0.007431		0.1142	1.43
Medium	Prostacyclin synthase OS=Mus musculus OX=10090 GN=Ptgis PE=1 SV=1	[R].IFDLQLPNFNPSEEK.[A]	2xDeamidated [N10; Q/N]; 1xOxidation [P]; 1xTMT6plex [K15]; 1xTMT6plex [N-Term]	O35074 1xOxidation [P]	0.480296	0.0454933	1	2	3	O35074	O35074 [108-122]	0	2267.18	0	551.8	537.6	8.14	10.45		Medium	Medium	Medium	Medium	Medium	Medium	Medium	Medium	Medium	Medium	Medium	Medium	-6.38	-6.38	0.01457	0.03161	0.2032	0.3598	3.19	3	524.7	623.5	542.8	601.1	560.9	554.8	463.9	537.6	598.1	479.9
High	Prostaglandin E synthase 2 OS=Mus musculus OX=10090 GN=Ptges2 PE=1 SV=3	[K].TYLVSGQPLEEVITYYPPMK.[A]	1xDeamidated [Q7]; 1xOxidation [P/M]; 1xTMT6plex [K20]; 1xTMT6plex [N-Term]	Q8BWM0 1xOxidation [P]	0.000681824	0	1	1	4	Q8BWM0	Q8BWM0 [173-192]	0	2803.49	0	32.6	33.7	6.7	9.02		High	High	High	High	High	High	High	High	High	High	High	High	5.25	9.31	0	0.005604	0.0001278	0.08118	4.25	45	30.3	36.2	34.2	30.8	32.2	33.7	35.8	36.6	31.4	29.4
Medium	Protein ABHD13 OS=Mus musculus OX=10090 GN=Abhd13 PE=2 SV=1	[R].LPNALLMLVNLR.[V]	2xDeamidated [N3; N10]; 2xOxidation [P2; M7]; 1xTMT6plex [N-Term]	Q80UX8 2xOxidation [P132; ]	0.43744	0.0392824	1	1	1	Q80UX8	Q80UX8 [131-142]	0	1629.94	0					No Quan Values	Medium	Medium	Medium	Medium	Medium	Medium	Medium	Medium	Medium	Medium	Medium	n/a	-14.53		0.01265		0.1837			7
High	Protein CDV3 OS=Mus musculus OX=10090 GN=Cdv3 PE=1 SV=2	[K].TAPVQAPPAPVTVTETPEPAMPSGVYRPPGAR.[L]	1xOxidation [P/M]; 1xTMT6plex [N-Term]	Q4VAA2 1xOxidation [P]	0.000529914	0	1	5	4	Q4VAA2	Q4VAA2 [167-198]	0	3486.83	0	65.9	64	6.27	13.67		High	High	High	High	High	High	High	High	High	High	High	High	1.74	1.74	0	0.0002188	9.638e-05	0.002761	5.03	12	59.2	58.6	65.5	67.1	66.4	54.1	75.9	74.3	64	62.1
High	Protein enabled homolog OS=Mus musculus OX=10090 GN=Enah PE=1 SV=2	[K].VISAPVSDATPDYAVVTALPPTSTPPTPPLR.[H]	5xOxidation [P11; P20; P21; P25; P26]; 1xTMT6plex [N-Term]	Q03173 5xOxidation [P299; P308; P309; P313; P314]	0.00015868	0	1	1	1	Q03173	Q03173 [289-319]	0	3439.8	0	12.5	16	21.05	16.97		High	High	High	High	High	High	High	High	High	High	High	n/a	-1.29		0		2.499e-05			8	14.6	11.5	18.7	12.8	12.1	16.1	11.5	12.6	17.4	16
High	Protein ERGIC-53 OS=Mus musculus OX=10090 GN=Lman1 PE=1 SV=1	[R].GAGTPGQPGQVSQQELDTVVK.[S]	1xOxidation [P5]; 1xTMT6plex [K21]; 1xTMT6plex [N-Term]	Q9D0F3 1xOxidation [P386]	6.90543e-07	0	1	1	4	Q9D0F3	Q9D0F3 [382-402]	0	2570.38	0	117.6	124.6	9.42	7.26		High	High	High	High	High	High	High	High	High	High	High	High	1.8	3.34	0	0	6.56e-07	1.214e-06	6.14	35	115.6	131.1	119.6	108.2	101	124.6	135.4	120.8	115.5	136.6
High	Protein ERGIC-53 OS=Mus musculus OX=10090 GN=Lman1 PE=1 SV=1	[R].GAGTPGQPGQVSQQELDTVVK.[S]	2xOxidation [P5; P8]; 1xTMT6plex [K21]; 1xTMT6plex [N-Term]	Q9D0F3 2xOxidation [P386; P389]	4.61842e-08	0	1	1	2	Q9D0F3	Q9D0F3 [382-402]	0	2586.38	0	313.6	315.3	6.45	8.96		High	High	High	High	High	High	High	High	High	High	High	High	3.01	3.01	0	0	2.742e-09	1.316e-08	6.8	72	307.2	295	333	352.8	311.6	315.3	325.3	319.1	281.6	263.4
Medium	Protein FAM149A (Fragment) OS=Mus musculus OX=10090 GN=Fam149a PE=4 SV=1	[R].GVLATILPTAAR.[A]	1xOxidation [P8]; 1xTMT6plex [N-Term]	F6X0J3 1xOxidation [P26]	0.222643	0.0163167	1	1	4	F6X0J3	F6X0J3 [19-30]	0	1427.88	0	494.5	458.7	3.11	3.46		High	High	High	High	High	High	High	High	High	High	n/a	High		-1.37		0.006747		0.1018	3.14		498.6	511.8	498.2	490.9	483.8	463.9	486.6	443.1	455.4	458.7
Medium	Protein FAM168A OS=Mus musculus OX=10090 GN=Fam168a PE=1 SV=1	[M].NPVYSPVQPGAPYGNPK.[N]	1xOxidation [P16]; 1xTMT6plex [K17]; 1xTMT6plex [N-Term]	Q8BGZ2 1xOxidation [P17]	0.335619	0.026665	1	1	1	Q8BGZ2	Q8BGZ2 [2-18]	0	2259.22	0					No Quan Values	High	High	High	High	High	High	High	High	High	High	High	n/a	-9.36		0.008584		0.1367			2
High	Protein FAM168A OS=Mus musculus OX=10090 GN=Fam168a PE=1 SV=1	[M].NPVYSPVQPGAPYGNPK.[N]	2xDeamidated [N1; N15]; 2xOxidation [P12; P16]; 1xTMT6plex [K17]; 1xTMT6plex [N-Term]	Q8BGZ2 2xOxidation [P13; P17]	0.0970377	0.00699372	1	1	1	Q8BGZ2	Q8BGZ2 [2-18]	0	2277.18	0					No Quan Values	High	High	High	High	High	High	High	High	High	High	High	n/a	-10.88		0.002132		0.03253			8
Medium	Protein FAM208B OS=Mus musculus OX=10090 GN=Fam208b PE=1 SV=2	[K].VMPFRHLQNTSPLQK.[H]	1xDeamidated [N9]; 1xOxidation [P12]; 1xTMT6plex [K15]; 1xTMT6plex [N-Term]	Q5DTT3 1xOxidation [P699]	0.424595	0.0374702	1	2	12	Q5DTT3	Q5DTT3 [688-702]	1	2271.27	0	701.9	690.7	9.61	6.49		Medium	Medium	Medium	Medium	Medium	Medium	Medium	Medium	Medium	Medium	Medium	Medium	6.9	6.9	0.0121	0.04856	0.178	0.546	3.99	12	716.2	646	694	594.7	709.9	624.4	664.8	690.7	739.2	715.3
Medium	Protein mono-ADP-ribosyltransferase PARP4 OS=Mus musculus OX=10090 GN=Parp4 PE=1 SV=1	[R].NYDPLSPAPAAPPAER.[S]	5xOxidation [P4; P7; P9; P12; P13]; 1xTMT6plex [N-Term]	E9PYK3 5xOxidation [P94; P97; P99; P102; P103]	0.192778	0.01393	1	1	1	E9PYK3	E9PYK3 [91-106]	0	1974.96	0	194.5	193.9	5.13	6.05		High	High	High	High	High	High	High	High	High	High	High	n/a	0.54		0.004252		0.07162			0	197.6	191.2	202.2	179.8	191.4	194.4	176	209	193.7	193.9
High	Protein NipSnap homolog 2 OS=Mus musculus OX=10090 GN=Nipsnap2 PE=1 SV=1	[K].LQFHNVKPECLDAYNK.[I]	1xCarbamidomethyl [C10]; 1xOxidation [P8]; 2xTMT6plex [K7; K16]; 1xTMT6plex [N-Term]	O55126 1xOxidation [P78]	0.000581778	0	1	3	7	O55126	O55126 [71-86]	0	2679.45	0	587.7	605.8	3.83	9.74		High	High	High	High	High	High	High	High	High	High	High	High	-1.8	-1.8	0	1.196e-05	0.0001066	0.000265	4.61	7	591.6	557.5	576.3	583.9	620.6	531.7	578	605.8	692.8	612.5
Medium	Protein timeless homolog OS=Mus musculus OX=10090 GN=Timeless PE=1 SV=3	[R].NILHVPANLEQEK.[S]	2xDeamidated [N1; Q11]; 1xOxidation [P6]; 1xTMT6plex [K13]; 1xTMT6plex [N-Term]	Q9R1X4 1xOxidation [P170]	0.166126	0.0119597	1	6	2	Q9R1X4	Q9R1X4 [165-177]	0	1981.1	0	488.9	599.7	11.65	24.38		High	High	High	High	High	High	High	High	High	High	High	Medium	9.22	9.22	0.003535	0.03471	0.05989	0.3909	2.81	10	429.7	527.7	486	583.6	491.8	727.4	844.9	572.1	438.7	599.7
High	Protein/nucleic acid deglycase DJ-1 OS=Mus musculus OX=10090 GN=Park7 PE=1 SV=1	[K].TQGPYDVVVLPGGNLGAQNLSESPMVK.[E]	1xDeamidated [Q/N]; 2xOxidation [P11; P/M]; 1xTMT6plex [K27]; 1xTMT6plex [N-Term]	Q99LX0 2xOxidation [P73; P]	0.00116007	5.03951e-05	1	3	2	Q99LX0	Q99LX0 [63-89]	0	3261.71	0					No Quan Values	High	High	High	High	High	High	High	High	High	High	High	High	13.42	13.42	5.7e-06	0.0002007	0.0002305	0.00247	4.71	8
Medium	Protocadherin-19 OS=Mus musculus OX=10090 GN=Pcdh19 PE=1 SV=3	[R].VIILDVNDNTPVITAPPLINGTAEVYIPR.[N]	3xDeamidated [N7; N9; N20]; 4xOxidation [P11; P16; P17; P28]; 1xTMT6plex [N-Term]	Q80TF3 4xOxidation [P561; P566; P567; P578]	0.442652	0.0401291	1	1	1	Q80TF3	Q80TF3 [551-579]	0	3413.81	0	63.2	59.6	13.85	4.3		Medium	Medium	Medium	Medium	Medium	Medium	Medium	Medium	Medium	Medium	Medium	n/a	-8.22		0.01283		0.1855			2	68.9	48.9	68.7	57.4	70.2	58	59.1	64.7	60.9	59.6
Medium	Protocadherin-8 OS=Mus musculus OX=10090 GN=Pcdh8 PE=1 SV=1	[R].DNYYQAQLPK.[T]	2xDeamidated [Q5; Q7]; 1xOxidation [P9]; 1xTMT6plex [K10]; 1xTMT6plex [N-Term]	Q7TSK3 1xOxidation [P1008]	0.266579	0.0200396	1	1	1	Q7TSK3	Q7TSK3 [1000-1009]	0	1715.89	0					No Quan Values	High	High	High	High	High	High	High	High	High	High	High	n/a	-0.89		0.006253		0.1048			3
High	Pyruvate dehydrogenase E1 component subunit alpha, somatic form, mitochondrial OS=Mus musculus OX=10090 GN=Pdha1 PE=1 SV=1	[K].NFYGGNGIVGAQVPLGAGIALACK.[Y]	1xCarbamidomethyl [C23]; 1xDeamidated [N]; 1xOxidation [P14]; 1xTMT6plex [K24]; 1xTMT6plex [N-Term]	P35486 1xOxidation [P172]	5.26501e-08	0	1	1	12	P35486	P35486 [159-182]	0	2822.53	0	455.3	468.9	9.39	4.4		High	High	High	High	High	High	High	High	High	High	High	High	2.61	1.89	0	0	1.508e-07	1.327e-08	5.08	23	424.9	549.3	451.6	481.7	459.1	470.4	425.8	460.2	477	468.9
High	Pyruvate dehydrogenase E1 component subunit alpha, somatic form, mitochondrial OS=Mus musculus OX=10090 GN=Pdha1 PE=1 SV=1	[K].NFYGGNGIVGAQVPLGAGIALACK.[Y]	1xCarbamidomethyl [C23]; 2xDeamidated [N6; Q/N]; 1xOxidation [P14]; 1xTMT6plex [K24]; 1xTMT6plex [N-Term]	P35486 1xOxidation [P172]	7.44232e-07	0	1	1	4	P35486	P35486 [159-182]	0	2823.51	0	36.6	39.2	14.89	7.97		High	High	High	High	High	High	High	High	High	High	High	High	2.28	5.66	0	0	6.316e-08	1.324e-06	4.95	53	35.4	47.7	39.1	38	31.9	41.3	35.1	38	43.3	39.2
High	Pyruvate dehydrogenase E1 component subunit alpha, somatic form, mitochondrial OS=Mus musculus OX=10090 GN=Pdha1 PE=1 SV=1	[K].LPCIFICENNR.[Y]	2xCarbamidomethyl [C3; C7]; 1xOxidation [P2]; 1xTMT6plex [N-Term]	P35486 1xOxidation [P217]	0.0173182	0.000799344	1	1	6	P35486	P35486 [216-226]	0	1680.84	0	417.3	452.8	7.03	6.13		High	High	High	High	High	High	High	High	High	High	High	High	-0.21	-0.21	0.001573	0.0002361	0.02354	0.003107	1.83	5	388.1	472.5	431.8	400.7	410.3	468.2	422.1	402.5	455.3	452.8
High	Pyruvate dehydrogenase E1 component subunit alpha, somatic form, mitochondrial OS=Mus musculus OX=10090 GN=Pdha1 PE=1 SV=1	[R].GFCHLCDGQEACCVGLEAGINPTDHLITAYR.[A]	4xCarbamidomethyl [C3; C6; C12; C13]; 1xOxidation [P22]; 1xTMT6plex [N-Term]	P35486 1xOxidation [P110]	2.20529e-09	0	1	1	26	P35486	P35486 [89-119]	0	3779.72	0	498.9	490.9	7.84	3.52		High	High	High	High	High	High	High	High	High	High	High	High	-3.88	-0.84	0	0	7.143e-09	8.502e-09	7.62	9	474.2	535.6	512	518.2	427.8	482.2	485.6	490.9	524.5	506.3
Medium	Pyruvate dehydrogenase E1 component subunit alpha, testis-specific form, mitochondrial OS=Mus musculus OX=10090 GN=Pdha2 PE=1 SV=1	[K].NFYGGNGIVGAQVPLGAGVAFACK.[Y]	1xCarbamidomethyl [C23]; 3xDeamidated [N1; N6; Q12]; 1xOxidation [P14]; 1xTMT6plex [K24]; 1xTMT6plex [N-Term]	P35487 1xOxidation [P173]	0.250691	0.0187429	1	1	1	P35487	P35487 [160-183]	0	2844.46	0	97.9	98.2	8.37	11.21		High	High	High	High	High	High	High	High	High	High	n/a	High		3.05		0.005913		0.08626	3.33		86.3	110.4	98.7	100.5	91.8	107.1	93	121.5	95.7	98.2
High	Pyruvate dehydrogenase E1 component subunit beta, mitochondrial OS=Mus musculus OX=10090 GN=Pdhb PE=1 SV=1	[K].VVSPWNSEDAK.[G]	1xOxidation [P4]; 1xTMT6plex [K11]; 1xTMT6plex [N-Term]	Q9D051 1xOxidation [P177]	0.0211591	0.00100901	1	1	2	Q9D051	Q9D051 [174-184]	0	1705.92	0					No Quan Values	High	High	High	High	High	High	High	High	High	High	High	High	-2.16	-2.16	0.0003061	0.003544	0.005903	0.04791	2.11	2
High	Pyruvate dehydrogenase E1 component subunit beta, mitochondrial OS=Mus musculus OX=10090 GN=Pdhb PE=1 SV=1	[K].VLEDNSVPQVK.[D]	1xOxidation [P8]; 1xTMT6plex [K11]; 1xTMT6plex [N-Term]	Q9D051 1xOxidation [P344]	0.00901693	0.0004817	1	1	4	Q9D051	Q9D051 [337-347]	0	1701.98	0	204.1	197.4	2.94	8.72		High	High	High	High	High	High	High	High	High	High	High	High	-2.96	-2.96	0.0001748	0.001195	0.002254	0.01778	3.33	16	194.7	208.6	195	205.9	202.4	192.3	170.7	201.9	217.9	197.4
High	Pyruvate dehydrogenase protein X component, mitochondrial OS=Mus musculus OX=10090 GN=Pdhx PE=1 SV=1	[K].DVSAPPPVSKPPAPTQPSPQPQIPCPAR.[K]	1xCarbamidomethyl [C25]; 1xOxidation [P]; 1xTMT6plex [K10]; 1xTMT6plex [N-Term]	Q8BKZ9 1xOxidation [P]	0.00174713	0.000188861	1	3	4	Q8BKZ9	Q8BKZ9 [146-173]	0	3390.82	0	127.8	122.7	9.65	5.32		High	High	High	High	High	High	High	High	High	High	High	High	3.3	3.3	4.271e-05	6.55e-05	0.0003637	0.001035	5.16	13	123.8	138.7	132	122.8	106.7	120.2	121.4	122.7	132	134.9
High	Pyruvate kinase PKM OS=Mus musculus OX=10090 GN=Pkm PE=1 SV=4 Isoform M1 of Pyruvate kinase PKM OS=Mus musculus OX=10090 GN=Pkm	[R].NTGIICTIGPASR.[S]	1xCarbamidomethyl [C6]; 1xOxidation [P10]; 1xTMT6plex [N-Term]	P52480 1xOxidation [P53]; P52480-2 1xOxidation [P53]	0.135995	0.00973065	2	8	4	P52480; P52480-2	P52480 [44-56]; P52480-2 [44-56]	0	1604.86	0	400.3	378.7	2.22	3.43	Shared	High	High	High	High	High	High	High	High	High	High	High	Medium	-1.14	-0.22	0.002967	0.03939	0.04769	0.4465	1.93	5	389.8	402.1	402.7	398.5	408.6	377.3	385.7	377.9	378.7	408.4
Medium	Pyruvate kinase PKM OS=Mus musculus OX=10090 GN=Pkm PE=1 SV=4 Isoform M1 of Pyruvate kinase PKM OS=Mus musculus OX=10090 GN=Pkm	[K].GDYPLEAVR.[M]	1xOxidation [P4]; 1xTMT6plex [N-Term]	P52480 1xOxidation [P371]; P52480-2 1xOxidation [P371]	0.466622	0.0436732	2	2	2	P52480; P52480-2	P52480 [368-376]; P52480-2 [368-376]	0	1264.67	0					No Quan Values	Medium	Medium	Medium	Medium	Medium	Medium	Medium	Medium	Medium	Medium	Medium	Medium	0.25	0.25	0.02861	0.01517	0.3534	0.207	2.33	4
High	Rab GDP dissociation inhibitor alpha OS=Mus musculus OX=10090 GN=Gdi1 PE=1 SV=3	[R].LSAIYGGTYMLNKPVDDIIMENGK.[V]	1xDeamidated [N22]; 1xOxidation [P/M]; 2xTMT6plex [K13; K24]; 1xTMT6plex [N-Term]	P50396 1xOxidation [P]	4.44545e-05	0	1	1	2	P50396	P50396 [241-264]	0	3346.79	0	70.3	74.5	9.73	5.32		High	High	High	High	High	High	High	High	High	High	High	High	0.4	0.4	0	0	5.973e-06	5.379e-06	5.64	15	68.3	64.2	74.9	58.3	72.4	78.6	76.4	72.3	68.3	74.5
High	Rab GDP dissociation inhibitor alpha OS=Mus musculus OX=10090 GN=Gdi1 PE=1 SV=3	[R].FQILEGPPESMGR.[G]	1xOxidation [P/M]; 1xTMT6plex [N-Term]	P50396 1xOxidation [P]	0.000172616	0	1	2	10	P50396	P50396 [56-68]	0	1705.88	0	335.4	361.5	3	5.28		High	High	High	High	High	High	High	High	High	High	High	High	-2.03	-1.12	0	1.196e-05	3.623e-05	0.000254	4.78	26	333	313.6	337.8	341.1	338.1	361.5	335.8	329.5	364.2	371.5
Medium	Rab3 GTPase-activating protein catalytic subunit OS=Mus musculus OX=10090 GN=Rab3gap1 PE=1 SV=1	[R].LTESSDEAAAVALPEEELK.[K]	1xOxidation [P14]; 1xTMT6plex [K19]; 1xTMT6plex [N-Term]	A0A1D5RLG3 1xOxidation [P917]	0.296675	0.022552	1	1	1	A0A1D5RLG3	A0A1D5RLG3 [904-922]	0	2476.31	0	229.1	169.9	49.48	13.58		High	High	High	High	High	High	High	High	High	High	n/a	High		2.29		0.007098		0.1089	2.18		231.5	330.8	226.6	137.6	58.6	161.5	189.7	131.5	182.7	169.9
Medium	Rabankyrin-5 OS=Mus musculus OX=10090 GN=Ankfy1 PE=1 SV=2	[R].SGCDVNSPR.[Q]	1xCarbamidomethyl [C3]; 1xOxidation [P8]; 1xTMT6plex [N-Term]	Q810B6 1xOxidation [P754]	0.189971	0.0135679	1	1	2	Q810B6	Q810B6 [747-755]	0	1236.58	0	53.8	49.3	16.17	10.36		High	High	High	High	High	High	High	High	High	High	High	High	1.31	1.31	0.007076	0.004219	0.1167	0.05898	2.26	4	48	59.3	53.4	67.9	54.2	52.9	59.4	48.1	45.8	49.3
Medium	Ras GTPase-activating protein-binding protein 2 OS=Mus musculus OX=10090 GN=G3bp2 PE=1 SV=2	[K].SATPPPAEPASLPQEPPK.[A]	2xOxidation [P9; P]; 1xTMT6plex [K18]; 1xTMT6plex [N-Term]	P97379 2xOxidation [P233; P]	0.43744	0.0392824	1	1	2	P97379	P97379 [225-242]	0	2304.25	0	5	9.1	49.23	22.24		Medium	Medium	Medium	Medium	Medium	Medium	Medium	Medium	Medium	Medium	n/a	Medium		-0.62		0.01304		0.1883	1.49		8.1	12.9	4.6	4.9	4.6	9.1	7.9	7.3	10	12.6
Medium	Ras GTPase-activating-like protein IQGAP2 OS=Mus musculus OX=10090 GN=Iqgap2 PE=1 SV=2	[K].EGSWVPPELCLSK.[E]	1xCarbamidomethyl [C10]; 2xOxidation [P6; P7]; 1xTMT6plex [K13]; 1xTMT6plex [N-Term]	Q3UQ44 2xOxidation [P624; P625]	0.455865	0.0419842	1	1	1	Q3UQ44	Q3UQ44 [619-631]	0	1992.05	0	92.2	89.9	10.78	10.32		Medium	Medium	Medium	Medium	Medium	Medium	Medium	Medium	Medium	Medium	n/a	Medium		-2.04		0.01434		0.1997	2.22		91.5	90	97.9	92.9	73.2	88.7	106.7	92	80.8	89.9
Medium	RasGAP-activating-like protein 1 OS=Mus musculus OX=10090 GN=Rasal1 PE=1 SV=2	[R].EAPGTTSPLR.[V]	1xOxidation [P8]; 1xTMT6plex [N-Term]	Q9Z268 1xOxidation [P195]	0.382914	0.032056	1	1	2	Q9Z268	Q9Z268 [188-197]	0	1273.69	0	49.2	52.4	15.43	15.8		Medium	Medium	Medium	Medium	Medium	Medium	Medium	Medium	Medium	Medium	Medium	Medium	1.24	1.24	0.01025	0.03631	0.1581	0.4098	1.51	2	56.5	47.5	67.2	45.4	49.7	52.9	41	52.4	45.7	62.2
High	Receptor expression-enhancing protein 6 OS=Mus musculus OX=10090 GN=Reep6 PE=4 SV=1	[K].SIGPSSWDNPGR.[QT]	1xDeamidated [N9]; 1xOxidation [P4]; 1xTMT6plex [N-Term]	D3YTR1 1xOxidation [P238]	0.100274	0.00728253	1	2	1	D3YTR1	D3YTR1 [235-246]	0	1518.74	0					No Quan Values	High	High	High	High	High	High	High	High	High	High	n/a	High		-7.42		0.001921		0.026	1.43
Medium	Receptor-interacting serine/threonine-protein kinase 1 OS=Mus musculus OX=10090 GN=Ripk1 PE=1 SV=1	[-].MQPDMSLDNIK.[M]	1xAcetyl [N-Term]; 1xDeamidated [Q2]; 1xOxidation [P3]; 1xTMT6plex [K11]; 1xTMT6plex [N-Term]	Q60855 1xAcetyl [N-Term]; 1xOxidation [P3]	0.385281	0.0322547	1	1	1	Q60855	Q60855 [1-11]	0	1808.92	0					No Quan Values	Medium	Medium	Medium	Medium	Medium	Medium	Medium	Medium	Medium	Medium	n/a	Medium		2.94		0.01034		0.1584	0.92
Medium	Reelin OS=Mus musculus OX=10090 GN=Reln PE=1 SV=3	[R].QTGPILGNMWAIDNVYIGPSCLK.[F]	1xCarbamidomethyl [C21]; 1xDeamidated [Q1]; 2xOxidation [P4; M9]; 1xTMT6plex [K23]; 1xTMT6plex [N-Term]	Q60841 2xOxidation [P658; ]	0.399704	0.0341605	1	1	1	Q60841	Q60841 [655-677]	0	3038.57	0	48.1	46	3.91	6.46		Medium	Medium	Medium	Medium	Medium	Medium	Medium	Medium	Medium	Medium	Medium	n/a	1.41		0.01102		0.1656			0	50.1	48.6	45.8	47.6	49.9	43.5	51.6	47.1	45.7	46
Medium	Regulator of G-protein signaling 22 OS=Mus musculus OX=10090 GN=Rgs22 PE=1 SV=1	[K].ILQNQQPRNPIYDVVR.[K]	3xDeamidated [N4; Q6; N9]; 2xOxidation [P7; P10]; 1xTMT6plex [N-Term]	G3UYX5 2xOxidation [P77; P80]	0.167385	0.0120011	1	1	1	G3UYX5	G3UYX5 [71-86]	1	2217.17	0	37	42.7	18.56	14.68		High	High	High	High	High	High	High	High	High	High	High	n/a	-5.25		0.003604		0.06094			10	33.6	53.1	37.2	34.1	36.8	43.6	31.6	42.7	45.6	36
Medium	Retinoic acid-induced protein 1 OS=Mus musculus OX=10090 GN=Rai1 PE=1 SV=3	[R].LSRPDGPADPAK.[Q]	2xOxidation [P4; P7]; 1xTMT6plex [K12]; 1xTMT6plex [N-Term]	Q61818 2xOxidation [P1739; P1742]	0.442652	0.0401291	1	2	2	Q61818	Q61818 [1736-1747]	0	1713.95	0					No Quan Values	Medium	Medium	Medium	Medium	Medium	Medium	Medium	Medium	Medium	Medium	Medium	Medium	-0.1	-0.1	0.04975	0.01341	0.5022	0.1916	2.46	7
Medium	Rho GTPase-activating protein 23 OS=Mus musculus OX=10090 GN=Arhgap23 PE=1 SV=2	[R].SAEALGPGALVSPRLER.[C]	2xOxidation [P7; P13]; 1xTMT6plex [N-Term]	Q69ZH9 2xOxidation [P367; P373]	0.346467	0.0280513	1	3	7	Q69ZH9	Q69ZH9 [361-377]	1	1984.1	0	91.6	71.3	13.15	14.74		High	High	High	High	High	High	High	High	High	High	Medium	High	-0.87	-0.87	0.01444	0.008888	0.2023	0.1364	3.97	11	95.1	88.3	102.3	86.2	103.4	71.3	68.4	69.3	81	95.3
Medium	Rho GTPase-activating protein 31 OS=Mus musculus OX=10090 GN=Arhgap31 PE=1 SV=1	[R].NLSPPLTPAPPPPTPLEEEPEVLLSK.[E]	5xOxidation [P10; P11; P12; P13; P15]; 1xTMT6plex [K26]; 1xTMT6plex [N-Term]	A6X8Z5 5xOxidation [P772; P773; P774; P775; P777]	0.455865	0.0419842	1	1	2	A6X8Z5	A6X8Z5 [763-788]	0	3300.79	0	11	11.5	17.38	23.51		Medium	Medium	Medium	Medium	Medium	Medium	Medium	Medium	Medium	Medium	Medium	n/a	-1.73		0.01344		0.1921			26	8.1	12.1	11.1	10.9	9.5	11.5	12.1	9.3	13.2	6.9
High	Rho GTPase-activating protein 31 OS=Mus musculus OX=10090 GN=Arhgap31 PE=1 SV=1	[K].TSPIPESSPAPFPFPEAPGSLPSSSAPR.[E]	5xOxidation [P3; P5; P9; P11; P13]; 1xTMT6plex [N-Term]	A6X8Z5 5xOxidation [P668; P670; P674; P676; P678]	1.10237e-05	0	1	1	1	A6X8Z5	A6X8Z5 [666-693]	0	3116.53	0	10.5	15.3	29.13	18.44		High	High	High	High	High	High	High	High	High	High	High	n/a	-0.41		0		1.259e-06			24	10.6	14.1	10.4	5.7	12.2	17.3	15.3	12.1	a	16.3
High	Rho GTPase-activating protein 35 OS=Mus musculus OX=10090 GN=Arhgap35 PE=1 SV=3	[R].STALQPYIK.[R]	1xOxidation [P6]; 1xTMT6plex [K9]; 1xTMT6plex [N-Term]	Q91YM2 1xOxidation [P115]	0.0864303	0.00625058	1	1	13	Q91YM2	Q91YM2 [110-118]	0	1494.89	0	1121	1134.4	3.3	4.31		High	High	High	High	High	High	High	High	High	High	High	High	-0.03	0.55	0.002543	0.001536	0.04003	0.02167	3.52	12	1120.3	1148.5	1091.5	1177.8	1076	1154.1	1134.4	1147.2	1116.2	1035.3
High	Ribonuclease inhibitor OS=Mus musculus OX=10090 GN=Rnh1 PE=1 SV=1	[R].ELHLNDNPMGDAGLK.[L]	1xOxidation [P/M]; 1xTMT6plex [K15]; 1xTMT6plex [N-Term]	Q91VI7 1xOxidation [P]	1.14442e-05	0	1	3	5	Q91VI7	Q91VI7 [112-126]	0	2098.1	0	240.3	223.6	12.29	10.42		High	High	High	High	High	High	High	High	High	High	High	High	-1.24	-1.24	0	0	3.741e-06	2.816e-06	5	28	277.7	266.6	253.2	202.6	216.8	223.6	220.6	205.1	246.2	267
High	Ribonuclease inhibitor OS=Mus musculus OX=10090 GN=Rnh1 PE=1 SV=1	[K].LSLQNCGLTEAGCGILPGMLR.[S]	2xCarbamidomethyl [C6; C13]; 1xOxidation [P/M]; 1xTMT6plex [N-Term]	Q91VI7 1xOxidation [P]	1.26955e-09	0	1	4	6	Q91VI7	Q91VI7 [85-105]	0	2505.28	0	126.9	125.3	7.52	8.47		High	High	High	High	High	High	High	High	High	High	High	High	-2.08	-2.08	0	0	1.264e-10	8.53e-09	7.24	85	122.5	132.8	143.5	115.8	130	125.3	114.5	117.6	140.2	133.3
Medium	RIKEN cDNA 2410002F23 gene OS=Mus musculus OX=10090 GN=2410002F23Rik PE=1 SV=1	[K].QNPNELMVTWILR.[V]	2xDeamidated [N2; N4]; 2xOxidation [P3; M7]; 1xTMT6plex [N-Term]	Q3TE80 2xOxidation [P34; ]	0.502685	0.0484172	1	5	1	Q3TE80	Q3TE80 [32-44]	0	1876.97	0	194.4	203.8	34.06	12.69		Medium	Medium	Medium	Medium	Medium	Medium	Medium	Medium	Medium	Medium	n/a	Medium		9.38		0.01776		0.2303	2.26		339.3	160.2	194.6	137.3	194.2	198.6	171.1	241.9	203.8	219.9
Medium	RIKEN cDNA 4932415D10 gene OS=Mus musculus OX=10090 GN=4932415D10Rik PE=4 SV=1	[K].LQEASECCRPAQQAK.[Q]	2xCarbamidomethyl [C7; C8]; 1xOxidation [P10]; 1xTMT6plex [K15]; 1xTMT6plex [N-Term]	A0A1W2P6U8 1xOxidation [P4580]	0.432271	0.0384931	1	1	1	A0A1W2P6U8	A0A1W2P6U8 [4571-4585]	0	2250.14	0	34.1	38.6	15.94	14.98		Medium	Medium	Medium	Medium	Medium	Medium	Medium	Medium	Medium	Medium	n/a	Medium		4.24		0.01276		0.1859	2.38		40.1	38.6	34.1	26.8	28.2	34.5	44.3	32.3	45.5	38.6
High	RIKEN cDNA 4933425K02, isoform CRA_a OS=Mus musculus OX=10090 GN=Slc9b1 PE=4 SV=1	[K].ILEQSEVTFPLK.[V]	1xDeamidated [Q4]; 1xOxidation [P10]; 1xTMT6plex [K12]; 1xTMT6plex [N-Term]	G5E8I2 1xOxidation [P555]	0.128704	0.00926043	1	2	1	G5E8I2	G5E8I2 [546-557]	0	1879.08	0					No Quan Values	High	High	High	High	High	High	High	High	High	High	n/a	High		2.73		0.002752		0.03589	2.52
Medium	RIKEN cDNA G430049J08 gene OS=Mus musculus OX=10090 GN=G430049J08Rik PE=2 SV=1	[K].ILVTATQEPLTLR.[A]	1xOxidation [P9]; 1xTMT6plex [N-Term]	Q3TL09 1xOxidation [P59]	0.404597	0.0350034	1	1	1	Q3TL09	Q3TL09 [51-63]	0	1700.02	0					No Quan Values	Medium	Medium	Medium	Medium	Medium	Medium	Medium	Medium	Medium	Medium	n/a	Medium		-0.66		0.01127		0.1701	1.92
Medium	RNA polymerase-associated protein RTF1 homolog OS=Mus musculus OX=10090 GN=Rtf1 PE=1 SV=1	[R].DPAVQAAILAQLNAK.[Y]	1xDeamidated [Q11]; 1xOxidation [P2]; 1xTMT6plex [K15]; 1xTMT6plex [N-Term]	A2AQ19 1xOxidation [P615]	0.499853	0.0481149	1	1	1	A2AQ19	A2AQ19 [614-628]	0	1998.16	0	97	105.3	11.84	13.73		Medium	Medium	Medium	Medium	Medium	Medium	Medium	Medium	Medium	Medium	Medium	Low	-3.7	-3.7	0.01559	0.1133	0.213	0.9807	2.34	6	99.8	97.2	96.9	76.3	83.5	99.6	105.3	103.7	107	137.3
Medium	RNA pseudouridylate synthase domain-containing protein 2 OS=Mus musculus OX=10090 GN=Rpusd2 PE=1 SV=2	[K].ALVQPNGDAGSNTSGEPLLERLEPAAVGK.[Q]	3xOxidation [P5; P17; P24]; 1xTMT6plex [K29]; 1xTMT6plex [N-Term]	Q149F1 3xOxidation [P55; P67; P74]	0.346467	0.0280513	1	1	1	Q149F1	Q149F1 [51-79]	1	3396.8	0	11	12.4	10.76	11.55		High	High	High	High	High	High	High	High	High	High	n/a	High		3.24		0.008924		0.1366	1.44		9.6	10.2	13.1	11.1	11.1	12.1	10.6	12.4	13.6	14.4
Medium	RNA-binding protein 27 OS=Mus musculus OX=10090 GN=Rbm27 PE=1 SV=3	[R].AISGLEGPLTK.[K]	1xOxidation [P8]; 1xTMT6plex [K11]; 1xTMT6plex [N-Term]	Q5SFM8 1xOxidation [P571]	0.277583	0.0210777	1	3	1	Q5SFM8	Q5SFM8 [564-574]	0	1559.94	0					No Quan Values	High	Not Found	High	High	Not Found	Not Found	Not Found	Not Found	High	Not Found	n/a	High		2.3		0.006632		0.09954	0.83
Medium	Ryanodine receptor 3 OS=Mus musculus OX=10090 GN=Ryr3 PE=1 SV=1	[R].DLYAFYPMLIRYVDNNR.[S]	1xDeamidated [N16]; 1xOxidation [P7]; 1xTMT6plex [N-Term]	A2AGL3 1xOxidation [P3265]	0.458539	0.0423285	1	1	1	A2AGL3	A2AGL3 [3259-3275]	1	2409.21	0	204	182.3	9.9	11.93		Medium	Medium	Medium	Medium	Medium	Medium	Medium	Medium	Medium	Medium	Medium	n/a	6.85		0.01353		0.1932			8	214	231.7	194.5	177.6	191.5	221.4	182.3	165.4	173	199.7
High	Sarcalumenin OS=Mus musculus OX=10090 GN=Srl PE=1 SV=1	[K].DIVEDPDKFYIFK.[T]	1xOxidation [P6]; 2xTMT6plex [K8; K13]; 1xTMT6plex [N-Term]	Q7TQ48 1xOxidation [P812]	0.0300692	0.00150729	1	2	2	Q7TQ48	Q7TQ48 [807-819]	1	2332.3	0					No Quan Values	High	High	High	High	High	High	High	High	High	High	High	High	7.16	7.16	0.0004514	0.00598	0.008775	0.08771	3.01	24
High	Sarcalumenin OS=Mus musculus OX=10090 GN=Srl PE=1 SV=1	[R].ALYADAAPGDK.[N]	1xOxidation [P8]; 1xTMT6plex [K11]; 1xTMT6plex [N-Term]	Q7TQ48 1xOxidation [P61]	9.14191e-06	0	1	1	4	Q7TQ48	Q7TQ48 [54-64]	0	1565.86	0	598.8	514.2	12.81	7.3		High	High	High	High	High	High	High	High	High	High	High	High	-0.91	-0.91	0	0	1.102e-06	3.968e-07	4.92	48	500.9	625.2	611.7	738	575.9	487	476.5	514.2	572.6	522.9
Medium	Sarcoplasmic/endoplasmic reticulum calcium ATPase 3 OS=Mus musculus OX=10090 GN=Atp2a3 PE=1 SV=3	[R].VEPAHK.[S]	1xOxidation [P3]; 1xTMT6plex [K6]; 1xTMT6plex [N-Term]	Q64518 1xOxidation [P681]	0.359823	0.0294776	1	6	3	Q64518	Q64518 [679-684]	0	1154.69	0					No Quan Values	High	High	High	High	High	High	High	High	High	High	Low	High	-0.17	-2.06	0.1066	0.009318	0.6433	0.1436	0.96	14
High	Sarcoplasmic/endoplasmic reticulum calcium ATPase 3 OS=Mus musculus OX=10090 GN=Atp2a3 PE=1 SV=3	[R].DIVPGDIVEVAVGDKVPADIR.[LI]	1xOxidation [P4]; 1xTMT6plex [K15]; 1xTMT6plex [N-Term]	Q64518 1xOxidation [P147]	0.0109444	0.000551893	1	7	2	Q64518	Q64518 [144-164]	1	2651.5	0					No Quan Values	High	High	High	High	High	High	High	High	High	High	High	High	-2.59	-2.59	0.003505	0.0001405	0.05872	0.001801	5.46	18
Medium	Sarcoplasmic/endoplasmic reticulum calcium ATPase 3 OS=Mus musculus OX=10090 GN=Atp2a3 PE=1 SV=3	[R].DIVPGDIVEVAVGDK.[V]	1xOxidation [P4]; 1xTMT6plex [K15]; 1xTMT6plex [N-Term]	Q64518 1xOxidation [P147]	0.402145	0.0346107	1	7	1	Q64518	Q64518 [144-158]	0	2000.13	0					No Quan Values	Medium	Medium	Medium	Medium	Medium	Medium	Medium	Medium	Medium	Medium	n/a	Medium		11.28		0.01103		0.1676	2.49
Medium	Secretogranin-2 OS=Mus musculus OX=10090 GN=Scg2 PE=1 SV=1	[R].EESSPDYNPYQGVSVPLQLK.[E]	2xDeamidated [Q11; Q18]; 1xOxidation [P9]; 1xTMT6plex [K20]; 1xTMT6plex [N-Term]	Q03517 1xOxidation [P80]	0.298636	0.0228526	1	1	1	Q03517	Q03517 [72-91]	0	2726.38	0					No Quan Values	High	High	High	High	High	High	High	High	High	High	High	n/a	0.41		0.007245		0.1191			1
Medium	Serine protease 33 OS=Mus musculus OX=10090 GN=Prss33 PE=2 SV=1	[R].VLLPPDYSEDEARGDLALLQLR.[H]	1xOxidation [P5]; 1xTMT6plex [N-Term]	Q80WM7 1xOxidation [P113]	0.450549	0.0412852	1	1	2	Q80WM7	Q80WM7 [109-130]	1	2728.47	0	89.2	91.6	6.66	5.71		Medium	Medium	Medium	Medium	Medium	Medium	Medium	Medium	Medium	Medium	Medium	Low	-3.7	-5.2	0.0132	0.709	0.1893	1	3.2	7	86	91.5	100.4	93.3	83.9	91.6	89.1	92.4	80.5	92.7
Medium	Serine/threonine-protein kinase D1 OS=Mus musculus OX=10090 GN=Prkd1 PE=1 SV=2	[R].SNSQSYIGRPIQLDK.[L]	3xDeamidated [N2; Q4; Q12]; 1xOxidation [P10]; 1xTMT6plex [K15]; 1xTMT6plex [N-Term]	Q62101 1xOxidation [P262]	0.427143	0.037726	1	1	1	Q62101	Q62101 [253-267]	0	2183.16	0	85.7	87.8	30.92	56.63		Medium	Medium	Medium	Medium	Medium	Medium	Medium	Medium	Medium	Medium	n/a	Medium		-0.6		0.0124		0.1827	2.92		157.2	86.5	102.7	85	83.8	229.1	87.8	98.3	87.8	69.7
Medium	Serine/threonine-protein kinase SIK1 OS=Mus musculus OX=10090 GN=Sik1 PE=1 SV=3	[R].QGPSLEEEQEVQEPLPGSTGR.[R]	2xDeamidated [Q1; Q9]; 1xOxidation [P14]; 1xTMT6plex [N-Term]	Q60670 1xOxidation [P465]	0.304579	0.0232998	1	1	5	Q60670	Q60670 [452-472]	0	2514.2	0	427.7	427.3	27.49	4.41		High	High	High	High	High	High	High	High	High	High	Medium	High	13.76	9.65	0.02915	0.009467	0.3589	0.1464	3.47	5	487.8	570.8	427.3	343.7	240.2	460.4	427.3	424.4	440.3	409.6
High	Serine/threonine-protein phosphatase 2A catalytic subunit beta isoform OS=Mus musculus OX=10090 GN=Ppp2cb PE=1 SV=1 Serine/threonine-protein phosphatase 2A catalytic subunit alpha isoform OS=Mus musculus OX=10090 GN=Ppp2ca PE=1 SV=1	[R].LQEVPHEGPMCDLLWSDPDDR.[G]	1xCarbamidomethyl [C11]; 3xOxidation [P9; M10; P18]; 1xTMT6plex [N-Term]	P62715 3xOxidation [P194; P203; P]; P63330 3xOxidation [P194; P203; P]	0.000107126	0	2	2	2	P62715; P63330	P62715 [186-206]; P63330 [186-206]	0	2786.26	0	45.5	43.9	10.59	8.6	Shared	High	High	High	High	High	High	High	High	High	High	High	Medium	1.66	1.66	0	0.02741	1.595e-05	0.3165	1.99	27	46.5	36.1	50.1	44.6	43.8	48.6	42.4	43.9	45.8	38.5
High	Serine/threonine-protein phosphatase 6 regulatory subunit 1 OS=Mus musculus OX=10090 GN=Ppp6r1 PE=1 SV=1	[R].LLTCVERPQLR.[Q]	1xCarbamidomethyl [C4]; 1xDeamidated [Q9]; 1xOxidation [P8]; 1xTMT6plex [N-Term]	Q7TSI3 1xOxidation [P176]	0.0743327	0.00531834	1	3	23	Q7TSI3	Q7TSI3 [169-179]	0	1630.91	0	2494.6	2445.4	6.24	6.68		High	High	High	High	High	High	High	High	High	High	High	High	1.47	-1.03	0.002121	0.004461	0.03244	0.06292	3.26	16	2563.3	2427.7	2356.8	2691.3	2652.2	2336.9	2518.7	2295.6	2709.6	2445.4
High	Serpin H1 OS=Mus musculus OX=10090 GN=Serpinh1 PE=1 SV=3	[K].KPLEAAAPGTAEK.[L]	1xOxidation [P8]; 2xTMT6plex [K1; K13]; 1xTMT6plex [N-Term]	P19324 1xOxidation [P29]	6.71555e-08	0	1	4	3	P19324	P19324 [22-34]	0	1986.18	0	348.3	422.8	11.51	28.21		High	High	High	High	High	High	High	High	High	High	High	High	-0.2	-0.2	0	0	1.34e-07	1.175e-09	6.03	47	319.5	379.4	364	369.1	275.1	461.8	443.8	289	228.1	422.8
Medium	Serum albumin OS=Mus musculus OX=10090 GN=Alb PE=1 SV=3	[K].AADKDTCFSTEGPNLVTR.[C]	1xCarbamidomethyl [C7]; 1xOxidation [P13]; 1xTMT6plex [K4]; 1xTMT6plex [N-Term]	P07724 1xOxidation [P597]	0.214866	0.0157088	1	1	5	P07724	P07724 [585-602]	1	2456.25	0	473.5	404.3	24.97	46.55		High	High	High	High	High	High	High	High	High	High	High	Medium	3.55	3.78	0.004782	0.03052	0.08162	0.3481	2.41	1	727.9	396.5	479.9	531.4	388.7	404.3	385.1	377.7	673.7	977.7
High	Serum albumin OS=Mus musculus OX=10090 GN=Alb PE=1 SV=3	[K].CCAEANPPACYGTVLAEFQPLVEEPK.[N]	3xCarbamidomethyl [C1; C2; C10]; 1xOxidation [P]; 1xTMT6plex [K26]; 1xTMT6plex [N-Term]	P07724 1xOxidation [P]	3.14444e-05	0	1	1	8	P07724	P07724 [384-409]	0	3424.66	0	134.3	119.8	31.61	50.4		High	High	High	High	High	High	High	High	High	High	High	High	-0.56	1.22	0	0	4.409e-06	3.077e-05	3.72	19	216.5	87.2	140.8	132.8	112.1	119.8	106.7	102.8	195.2	296
Medium	SET domain-containing protein 5 OS=Mus musculus OX=10090 GN=Setd5 PE=1 SV=2	[R].NPNAAELPLPPPPSFPTIGAETRR.[R]	2xDeamidated [N1; N3]; 1xOxidation [P16]; 1xTMT6plex [N-Term]	Q5XJV7 1xOxidation [P432]	0.27945	0.0212729	1	1	3	Q5XJV7	Q5XJV7 [417-440]	1	2789.47	0	93.8	100.1	14.09	2.08		High	High	High	High	High	High	High	High	High	High	High	Low	5.67	5.67	0.006627	0.06048	0.1105	0.668	4.47	2	89.8	83.4	110.9	76	98	102.7	98.6	100.1	103.2	99
High	Short-chain specific acyl-CoA dehydrogenase, mitochondrial OS=Mus musculus OX=10090 GN=Acads PE=1 SV=2	[K].IGCFALSEPGNGSDAGAASTTAR.[E]	1xCarbamidomethyl [C3]; 1xDeamidated [N11]; 1xOxidation [P9]; 1xTMT6plex [N-Term]	Q07417 1xOxidation [P157]	1.6959e-06	0	1	1	8	Q07417	Q07417 [149-171]	0	2456.16	0	501.4	502.4	2.78	2.22		High	High	High	High	High	High	High	High	High	High	High	High	-0.4	1.66	0	0	1.376e-06	5.336e-06	4.08	21	492.7	495.8	521.5	507.1	518.3	502.4	490.5	492.2	515.9	510.6
High	Signal-induced proliferation-associated protein 1 OS=Mus musculus OX=10090 GN=Sipa1 PE=1 SV=2	[K].LGPETAAQMLR.[S]	1xOxidation [P3]; 1xTMT6plex [N-Term]	P46062 1xOxidation [P736]	0.0413737	0.00261438	1	1	2	P46062	P46062 [734-744]	0	1431.78	0	283.9	263.2	9.7	8.04		High	High	High	High	High	High	High	High	High	High	High	High	2.17	2.17	0.004375	0.0006075	0.07397	0.008883	2.82	21	264.1	306.6	281.5	333.8	286.3	299.4	259.6	287.6	263.2	245.9
High	Slit homolog 1 protein OS=Mus musculus OX=10090 GN=Slit1 PE=1 SV=2	[K].LLLTTPAK.[K]	1xOxidation [P6]; 1xTMT6plex [K8]; 1xTMT6plex [N-Term]	Q80TR4 1xOxidation [P908]	0.0694696	0.00501622	1	3	7	Q80TR4	Q80TR4 [903-910]	0	1330.87	0	23	27.5	16.8	25.57		High	High	High	High	High	High	High	High	High	High	High	High	-0.13	-0.13	0.001701	0.00114	0.02565	0.01663	2.53	23	25.9	23.5	15.8	22.8	23.1	29.8	32.8	17.1	20.6	27.5
High	Sodium/calcium exchanger 1 OS=Mus musculus OX=10090 GN=Slc8a1 PE=1 SV=1	[R].GGGEDFEDTCGEPEFQNDEIVK.[T]	1xCarbamidomethyl [C10]; 1xOxidation [P13]; 1xTMT6plex [K22]; 1xTMT6plex [N-Term]	P70414 1xOxidation [P592]	1.46089e-09	0	1	1	6	P70414	P70414 [580-601]	0	2946.34	2	577.4	540	5.52	1.72		High	High	High	High	High	High	High	High	High	High	High	n/a	10.78		0		5.681e-11			66	524.1	596.4	559.1	600.3	596.3	551	534.6	540.6	525.6	540
High	Sodium/calcium exchanger 1 OS=Mus musculus OX=10090 GN=Slc8a1 PE=1 SV=1 Sodium/calcium exchanger 1 OS=Mus musculus OX=10090 GN=Slc8a1 PE=1 SV=1	[K].GVILPIWEPQDPSFGDK.[I]	1xOxidation [P9]; 1xTMT6plex [K17]; 1xTMT6plex [N-Term]	G3X9J1 1xOxidation [P63]; P70414 1xOxidation [P63]	4.24225e-05	0	2	4	2	G3X9J1; P70414	G3X9J1 [55-71]; P70414 [55-71]	0	2372.29	0	55	52.5	9.92	8.11	Shared	High	High	High	High	High	High	High	High	High	High	High	High	13.77	13.77	0	1.196e-05	5.69e-06	0.0001124	3.44	22	61.3	54.1	56	48.3	60.3	47.4	47.5	52.5	54.9	56.5
High	Sodium/calcium exchanger 1 OS=Mus musculus OX=10090 GN=Slc8a1 PE=1 SV=1 Sodium/calcium exchanger 1 OS=Mus musculus OX=10090 GN=Slc8a1 PE=1 SV=1	[K].GVILPIWEPQDPSFGDK.[I]	2xOxidation [P5; P9]; 1xTMT6plex [K17]; 1xTMT6plex [N-Term]	G3X9J1 2xOxidation [P59; P63]; P70414 2xOxidation [P59; P63]	0.00094504	5.03951e-05	2	4	2	G3X9J1; P70414	G3X9J1 [55-71]; P70414 [55-71]	0	2388.29	0	66.3	72.7	5.91	7.55	Shared	High	High	High	High	High	High	High	High	High	High	High	High	0.09	0.09	0	6.55e-05	0.0001839	0.0009884	3.17	24	66.9	70.1	65.2	61	65.7	69.5	72.7	64.9	78.7	76.2
High	Sodium/potassium-transporting ATPase subunit beta-3 OS=Mus musculus OX=10090 GN=Atp1b3 PE=1 SV=1	[R].IIDLIPDGYPQISCLPK.[E]	1xCarbamidomethyl [C14]; 1xOxidation [P10]; 1xTMT6plex [K17]; 1xTMT6plex [N-Term]	P97370 1xOxidation [P187]	0.0173182	0.000799344	1	1	2	P97370	P97370 [178-194]	0	2416.36	0	51.2	52.9	27.1	12.67		High	High	High	High	High	High	High	High	High	High	High	High	-1.64	-1.64	0.0002427	0.001055	0.004706	0.01531	3.42	35	53.5	77.9	49.1	43.4	36.2	52.9	48.1	53	66.2	51.6
High	Solute carrier family 25 member 51 OS=Mus musculus OX=10090 GN=Slc25a51 PE=1 SV=1	[R].IQSQIGGPFLSLPMVFK.[T]	1xOxidation [P/M]; 1xTMT6plex [K17]; 1xTMT6plex [N-Term]	Q5HZI9 1xOxidation [P]	7.16886e-07	0	1	2	2	Q5HZI9	Q5HZI9 [240-256]	0	2336.35	0	49.2	48.2	17.94	8.86		High	High	High	High	High	High	High	High	High	High	High	High	0.82	0.82	0	0	5.875e-08	8.497e-07	4.79	38	38	48.7	62.1	44.9	59.7	47.4	45.7	52.6	56.6	48.2
Medium	Spermatogenesis-associated protein 13 OS=Mus musculus OX=10090 GN=Spata13 PE=1 SV=1	[R].SAAPGPGPGLGDENPLLAPR.[S]	1xDeamidated [N14]; 1xOxidation [P15]; 1xTMT6plex [N-Term]	E9Q3I3 1xOxidation [P324]	0.33348	0.026401	1	1	2	E9Q3I3	E9Q3I3 [310-329]	0	2132.12	0	203.6	208.8	3.29	6.7		High	High	High	High	High	High	High	High	High	High	n/a	High		3.82		0.008405		0.1291	3.01		218.5	200.8	207.6	202.8	204.4	183.4	213.4	193.3	208.8	213.7
High	Stress-70 protein, mitochondrial OS=Mus musculus OX=10090 GN=Hspa9 PE=1 SV=3	[R].VINEPTAAALAYGLDK.[S]	1xOxidation [P5]; 1xTMT6plex [K16]; 1xTMT6plex [N-Term]	P38647 1xOxidation [P223]	0.0822126	0.0059672	1	1	2	P38647	P38647 [219-234]	0	2120.2	0					No Quan Values	High	High	High	High	High	High	High	High	High	High	High	High	-2.69	-2.69	0.004696	0.001441	0.08055	0.0205	3.47	18
High	Succinate dehydrogenase [ubiquinone] flavoprotein subunit, mitochondrial OS=Mus musculus OX=10090 GN=Sdha PE=1 SV=1	[K].TLNEADCATVPPAIR.[S]	1xCarbamidomethyl [C7]; 1xOxidation [P]; 1xTMT6plex [N-Term]	Q8K2B3 1xOxidation [P]	0.00374166	0.000294152	1	2	15	Q8K2B3	Q8K2B3 [648-662]	0	1872.97	0	714.4	720.6	7.77	2.12		High	High	High	High	High	High	High	High	High	High	High	High	-2.52	-1.23	0.0001857	0.0002278	0.002829	0.002896	3.6	12	735.6	688.7	771.5	626	693.9	744.4	704.7	720.6	713.7	730.4
High	Succinate dehydrogenase [ubiquinone] flavoprotein subunit, mitochondrial OS=Mus musculus OX=10090 GN=Sdha PE=1 SV=1	[K].VSDAISTQYPVVDHEFDAVVVGAGGAGLR.[A]	1xOxidation [P10]; 1xTMT6plex [N-Term]	Q8K2B3 1xOxidation [P56]	7.87678e-10	0	1	2	4	Q8K2B3	Q8K2B3 [47-75]	0	3174.63	0	38.8	38.5	6.92	12.4		High	High	High	High	High	High	High	High	High	High	High	High	-1.99	-1.99	0	0	1.767e-08	1.928e-08	8.85	37	40.1	41.1	40.9	35.3	37.6	38.5	47.7	37.3	46.1	37.1
High	Succinate dehydrogenase [ubiquinone] flavoprotein subunit, mitochondrial OS=Mus musculus OX=10090 GN=Sdha PE=1 SV=1	[R].ACALSIAESCRPGDK.[V]	2xCarbamidomethyl [C2; C10]; 1xOxidation [P12]; 1xTMT6plex [K15]; 1xTMT6plex [N-Term]	Q8K2B3 1xOxidation [P477]	0.00395579	0.000294152	1	1	7	Q8K2B3	Q8K2B3 [466-480]	0	2109.08	0	1723.5	1716.6	3.42	2.75		High	High	High	High	High	High	High	High	High	High	High	High	-1.04	-0.94	7.662e-05	4.981e-05	0.0008995	0.0008168	3.04	7	1741.2	1666.1	1705.9	1640	1795.6	1632.1	1735.1	1737.7	1716.6	1665.2
High	Succinate dehydrogenase cytochrome b560 subunit, mitochondrial OS=Mus musculus OX=10090 GN=Sdhc PE=1 SV=1	[K].SLCLGPTLIYSAK.[F]	1xCarbamidomethyl [C3]; 1xOxidation [P6]; 1xTMT6plex [K13]; 1xTMT6plex [N-Term]	Q9CZB0 1xOxidation [P110]	0.0915967	0.00657953	1	2	3	Q9CZB0	Q9CZB0 [105-117]	0	1897.09	0	122.5	121.6	7.76	6.4		High	High	High	High	High	High	High	High	High	High	High	High	-0.48	-0.48	0.00203	0.003811	0.03051	0.05118	2.99	11	116.3	136.1	125	108.3	126.3	108.7	123.6	117.8	121.6	129.4
High	Succinate--CoA ligase [ADP/GDP-forming] subunit alpha, mitochondrial OS=Mus musculus OX=10090 GN=Suclg1 PE=1 SV=4	[R].LIGPNCPGVINPGECK.[I]	2xCarbamidomethyl [C6; C15]; 1xOxidation [P]; 1xTMT6plex [K16]; 1xTMT6plex [N-Term]	Q9WUM5 1xOxidation [P]	1.4597e-05	0	1	1	26	Q9WUM5	Q9WUM5 [167-182]	0	2199.17	0	1695.5	1641.9	2.87	5.34		High	High	High	High	High	High	High	High	High	High	High	High	-0.78	-0.32	0	0.0001448	2.055e-05	0.001905	5.05	21	1694	1808.7	1682.9	1734.8	1681.3	1641.9	1547.7	1691.7	1735.6	1538
High	Succinate--CoA ligase [ADP-forming] subunit beta, mitochondrial OS=Mus musculus OX=10090 GN=Sucla2 PE=1 SV=2	[R].SFQGPVLIGSAQGGVNIEDVAAENPEAIVK.[E]	1xDeamidated [N]; 1xOxidation [P25]; 1xTMT6plex [K30]; 1xTMT6plex [N-Term]	Q9Z2I9 1xOxidation [P200]	9.86056e-10	0	1	1	4	Q9Z2I9	Q9Z2I9 [176-205]	0	3484.86	0	119.2	107.5	5.06	18.66		High	High	High	High	High	High	High	High	High	High	High	High	8.07	11.95	0	0	1.786e-08	1.192e-09	6.68	37	123.7	131.4	119.5	119	113.4	107.5	95.8	129.9	138.3	90.4
High	Succinate--CoA ligase [GDP-forming] subunit beta, mitochondrial OS=Mus musculus OX=10090 GN=Suclg2 PE=1 SV=3	[K].IDATQVEVNPFGETPEGQVVCFDAK.[I]	1xCarbamidomethyl [C21]; 1xOxidation [P]; 1xTMT6plex [K25]; 1xTMT6plex [N-Term]	Q9Z2I8 1xOxidation [P]	3.23397e-05	0	1	2	4	Q9Z2I8	Q9Z2I8 [236-260]	0	3224.62	0	131.1	123.6	11.03	5.95		High	High	High	High	High	High	High	High	High	High	High	High	-1.82	-1.82	0	0	7.068e-06	2.807e-05	4.36	26	157.4	119.6	133.9	118	128.4	133	117.1	123.6	127	115
High	Succinate-semialdehyde dehydrogenase, mitochondrial OS=Mus musculus OX=10090 GN=Aldh5a1 PE=1 SV=1	[K].EVGEVLCTDPLVSK.[I]	1xCarbamidomethyl [C7]; 1xOxidation [P10]; 1xTMT6plex [K14]; 1xTMT6plex [N-Term]	Q8BWF0 1xOxidation [P263]	0.0075649	0.000425444	1	1	2	Q8BWF0	Q8BWF0 [254-267]	0	2020.1	0	111.6	112.2	5.2	3.65		High	High	High	High	High	High	High	High	High	High	High	High	0.87	0.87	0.0001346	0.0004956	0.001865	0.006991	2.98	14	102.7	111.4	118.5	112.6	111.8	105.1	112.4	108.9	115.8	112.2
High	Succinyl-CoA:3-ketoacid coenzyme A transferase 1, mitochondrial OS=Mus musculus OX=10090 GN=Oxct1 PE=1 SV=1	[R].AGGAGVPAFYTSTGYGTLVQEGGSPIK.[Y]	1xDeamidated [Q20]; 1xOxidation [P25]; 1xTMT6plex [K27]; 1xTMT6plex [N-Term]	Q9D0K2 1xOxidation [P171]	0.0229571	0.00107996	1	2	2	Q9D0K2	Q9D0K2 [147-173]	0	3060.59	0	52.7	52.7	11.48	11.04		High	High	High	High	High	High	High	High	High	High	High	High	11.32	11.32	0.0003176	0.002393	0.006449	0.03078	3.85	22	52	63.7	57.5	50.7	53.4	64.3	52.7	57.5	50.3	49.8
High	Sulfide:quinone oxidoreductase, mitochondrial (Fragment) OS=Mus musculus OX=10090 GN=Sqor PE=1 SV=1 Sulfide:quinone oxidoreductase, mitochondrial OS=Mus musculus OX=10090 GN=Sqor PE=1 SV=3	[K].QEAVFEILDKPGETHVIPYEMLHVTPPMSAPDVLK.[R]	1xOxidation [P]; 2xTMT6plex [K10; K35]; 1xTMT6plex [N-Term]	H3BLH2 1xOxidation [P]; Q9R112 1xOxidation [P]	0.000769752	2.60064e-05	2	2	2	H3BLH2; Q9R112	H3BLH2 [53-87]; Q9R112 [271-305]	0	4634.49	0	53.2	59.6	7.68	6.66	Shared	High	High	High	High	High	High	High	High	High	High	High	High	2.43	2.43	0	1.196e-05	0.0001458	0.0001316	4.32	2	56.4	53.3	57.1	49.9	46.3	62.1	59.6	54.4	61	53.6
Medium	Suppressor of tumorigenicity 7 protein-like OS=Mus musculus OX=10090 GN=St7l PE=2 SV=1	[K].GLSTAEINAVEAIHRAVEFNPHVPK.[YH]	1xDeamidated [N20]; 1xOxidation [P21]; 1xTMT6plex [K25]; 1xTMT6plex [N-Term]	Q8K4P7 1xOxidation [P415]	0.480296	0.0454933	1	3	1	Q8K4P7	Q8K4P7 [395-419]	1	3174.73	0	142.2	122.2	10.78	26.46		Medium	Medium	Medium	Medium	Medium	Medium	Medium	Medium	Medium	Medium	n/a	Medium		4.14		0.01617		0.2162	3.89		161	114.4	146.1	144.4	140.1	95.9	134.8	122.2	181.8	104.1
Medium	Talin-1 OS=Mus musculus OX=10090 GN=Tln1 PE=1 SV=2	[K].ALSTDPASPNLK.[S]	1xOxidation [P6]; 1xTMT6plex [K12]; 1xTMT6plex [N-Term]	P26039 1xOxidation [P1326]	0.355329	0.029136	1	1	1	P26039	P26039 [1321-1332]	0	1687.96	0					No Quan Values	High	High	High	High	High	High	High	High	High	High	High	Low	11.98	11.98	0.009304	0.1603	0.1453	1	1.64	1
Medium	T-cell acute lymphocytic leukemia protein 1 homolog OS=Mus musculus OX=10090 GN=Tal1 PE=1 SV=1	[R].AAPAEPPVIELGAR.[S]	2xOxidation [P3; P6]; 1xTMT6plex [N-Term]	P22091 2xOxidation [P46; P49]	0.355329	0.029136	1	2	1	P22091	P22091 [44-57]	0	1651.92	0	52.9	45.5	7.32	8.11		High	High	High	High	High	High	High	High	High	High	n/a	High		2.66		0.009148		0.1404	2.14		48.7	54.2	51.6	56.7	58	46.3	43.6	44.8	53.2	45.5
Medium	Terminal uridylyltransferase 4 OS=Mus musculus OX=10090 GN=Tut4 PE=1 SV=2	[K].VNAASVPGPKDLGLVHR.[D]	1xDeamidated [N2]; 1xOxidation [P9]; 1xTMT6plex [K10]; 1xTMT6plex [N-Term]	B2RX14 1xOxidation [P81]	0.461223	0.0428569	1	3	3	B2RX14	B2RX14 [73-89]	1	2205.28	0	364.9	349.2	10.9	9.44		Medium	Medium	Medium	Medium	Medium	Medium	Medium	Medium	Medium	Medium	Medium	Medium	0.9	0.9	0.01365	0.03341	0.1944	0.3785	2.48	1	376.9	305.4	359.7	354	370.2	288.7	358.3	374.1	349.2	347.9
High	Tether containing UBX domain for GLUT4 OS=Mus musculus OX=10090 GN=Aspscr1 PE=1 SV=1	[R].ASGSPPLLPAPDPVSLESEPIAEDGALGPPEPIQGTAQPVK.[R]	5xOxidation [P6; P9; P11; P13; P]; 1xTMT6plex [K41]; 1xTMT6plex [N-Term]	Q8VBT9 5xOxidation [P498; P501; P503; P505; P]	3.51992e-07	0	1	1	2	Q8VBT9	Q8VBT9 [493-533]	0	4567.37	0	74.2	75.4	6.53	6.85		High	High	High	High	High	High	High	High	High	High	High	n/a	-1.2		0		3.428e-05			8	72.4	83.9	76.1	71.1	77.4	85.6	72.7	73.3	75.4	78.6
Medium	Tetratricopeptide repeat protein 17 OS=Mus musculus OX=10090 GN=Ttc17 PE=1 SV=1	[R].YQANLEITGPKVASPGPQEK.[K]	2xDeamidated [N4; Q18]; 2xOxidation [P15; P17]; 2xTMT6plex [K11; K20]; 1xTMT6plex [N-Term]	E9PVB5 2xOxidation [P942; P944]	0.233887	0.0174741	1	1	1	E9PVB5	E9PVB5 [928-947]	1	2848.55	0					No Quan Values	High	High	High	High	High	High	High	High	High	High	High	n/a	6.36		0.00536		0.08992			10
Medium	Thioredoxin reductase 3 OS=Mus musculus OX=10090 GN=Txnrd3 PE=1 SV=3	[R].AQTSPGLGK.[V]	1xDeamidated [Q2]; 1xOxidation [P5]; 1xTMT6plex [K9]; 1xTMT6plex [N-Term]	Q99MD6 1xOxidation [P17]	0.304579	0.0232998	1	1	2	Q99MD6	Q99MD6 [13-21]	0	1333.77	0					No Quan Values	High	High	High	High	High	High	High	High	High	High	Medium	High	-0.83	-0.83	0.0263	0.007365	0.3286	0.1129	2.6	10
High	Thioredoxin, mitochondrial OS=Mus musculus OX=10090 GN=Txn2 PE=1 SV=1	[R-].VVNSETPVVVDFHAQWCGPCK.[I]	2xCarbamidomethyl [C17; C20]; 2xOxidation [P7; P19]; 1xTMT6plex [K21]; 1xTMT6plex [N-Term]	P97493 2xOxidation [P80; P92]	0.0724736	0.00522641	1	4	1	P97493	P97493 [74-94]	0	2919.45	0					No Quan Values	High	High	High	High	High	High	High	High	High	High	n/a	High		-1.35		0.001175		0.01749	3.12
High	Thioredoxin-dependent peroxide reductase, mitochondrial OS=Mus musculus OX=10090 GN=Prdx3 PE=1 SV=1	[K].AFQFVETHGEVCPANWTPESPTIKPSPTASK.[E]	1xCarbamidomethyl [C12]; 1xDeamidated [N15]; 1xOxidation [P]; 2xTMT6plex [K24; K31]; 1xTMT6plex [N-Term]	P20108 1xOxidation [P]	1.19999e-08	0	1	1	2	P20108	P20108 [219-249]	0	4118.11	0	176.9	177.4	7.74	4.34		High	High	High	High	High	High	High	High	High	High	High	High	6.59	6.59	0	0	6.06e-10	1.035e-08	7.05	39	182.4	190.3	175.5	154.6	161	166.6	167.7	184.6	177.4	178.3
High	Thioredoxin-dependent peroxide reductase, mitochondrial OS=Mus musculus OX=10090 GN=Prdx3 PE=1 SV=1	[K].AFQFVETHGEVCPANWTPESPTIKPSPTASK.[E]	1xCarbamidomethyl [C12]; 1xDeamidated [N15]; 3xOxidation [P13; P18; P21]; 2xTMT6plex [K24; K31]; 1xTMT6plex [N-Term]	P20108 3xOxidation [P231; P236; P239]	0.104453	0.00763392	1	1	1	P20108	P20108 [219-249]	0	4150.1	0	143.3	139	3.39	11.76		High	High	High	High	High	High	High	High	High	High	n/a	High		-9.89		0.002086		0.02753	3.89		152.5	141.3	143.3	138.5	143.4	132.4	132	165.8	165.4	139
High	Thioredoxin-dependent peroxide reductase, mitochondrial OS=Mus musculus OX=10090 GN=Prdx3 PE=1 SV=1	[K].AFQFVETHGEVCPANWTPESPTIKPSPTASK.[E]	1xCarbamidomethyl [C12]; 1xOxidation [P13]; 2xTMT6plex [K24; K31]; 1xTMT6plex [N-Term]	P20108 1xOxidation [P231]	1.4338e-09	0	1	1	12	P20108	P20108 [219-249]	0	4117.13	0	799.1	838.3	2.56	3.38		High	High	High	High	High	High	High	High	High	High	High	High	-2.07	0.41	0	0	4.092e-09	9.278e-09	9.01	18	807.8	791.3	797.8	800.5	845.9	808.8	800.9	871.6	838.3	838.5
High	Thioredoxin-dependent peroxide reductase, mitochondrial OS=Mus musculus OX=10090 GN=Prdx3 PE=1 SV=1	[K].AFQFVETHGEVCPANWTPESPTIKPSPTASK.[E]	1xCarbamidomethyl [C12]; 2xOxidation [P13; P18]; 2xTMT6plex [K24; K31]; 1xTMT6plex [N-Term]	P20108 2xOxidation [P231; P236]	4.79644e-10	0	1	1	8	P20108	P20108 [219-249]	0	4133.13	0	279.1	292.7	3.6	3.56		High	High	High	High	High	High	High	High	High	High	High	High	-0.61	0.61	0	0	1.147e-09	2.011e-09	8.73	23	277	271.3	281.2	267.3	287.3	275.6	285.9	301	292.7	298.9
High	Thioredoxin-dependent peroxide reductase, mitochondrial OS=Mus musculus OX=10090 GN=Prdx3 PE=1 SV=1	[K].AFQFVETHGEVCPANWTPESPTIKPSPTASK.[E]	1xCarbamidomethyl [C12]; 3xOxidation [P13; P18; P21]; 2xTMT6plex [K24; K31]; 1xTMT6plex [N-Term]	P20108 3xOxidation [P231; P236; P239]	3.17557e-07	0	1	1	5	P20108	P20108 [219-249]	0	4149.12	0	238.8	241.5	7.09	5.13		High	High	High	High	High	High	High	High	High	High	High	High	-2.35	4.34	0	0	2.787e-06	3.067e-07	6.88	36	247.2	224.2	233.8	216.6	263.3	238.7	241.5	248.7	254.2	221.7
Medium	Titin OS=Mus musculus OX=10090 GN=Ttn PE=1 SV=1	[R].SPTPPSIAAK.[A]	3xOxidation [P2; P4; P5]; 1xTMT6plex [K10]; 1xTMT6plex [N-Term]	A2ASS6 3xOxidation [P265; P267; P268]	0.281326	0.0214402	1	1	3	A2ASS6	A2ASS6 [264-273]	0	1474.85	3	1460.6	1381.7	23.38	13.32		High	High	High	High	High	High	High	High	High	High	High	n/a	-0.92		0.00667		0.111			18	2086.6	1281.3	1545.8	1064.4	1380	1586.6	1340.3	1098.2	1485.5	1381.7
High	Titin OS=Mus musculus OX=10090 GN=Ttn PE=1 SV=1 Titin OS=Mus musculus OX=10090 GN=Ttn PE=1 SV=1	[K].INADIAGRPLPVISWAK.[D]	1xDeamidated [N2]; 1xOxidation [P11]; 1xTMT6plex [K17]; 1xTMT6plex [N-Term]	E9Q8K5 1xOxidation [P25862]; A2ASS6 1xOxidation [P27608]	0.106166	0.00770984	2	4	2	E9Q8K5; A2ASS6	E9Q8K5 [25852-25868]; A2ASS6 [27598-27614]	0	2296.34	0					No Quan Values	High	High	High	High	High	High	High	High	High	High	High	Medium	-3.07	-3.07	0.002322	0.0374	0.03605	0.4223	2.24	3
High	Titin OS=Mus musculus OX=10090 GN=Ttn PE=1 SV=1 Titin OS=Mus musculus OX=10090 GN=Ttn PE=1 SV=1	[K].VLTVACAFTGEPTPEITWSCGGR.[K]	2xCarbamidomethyl [C6; C20]; 2xOxidation [P12; P14]; 1xTMT6plex [N-Term]	E9Q8K5 2xOxidation [P33399; P33401]; A2ASS6 2xOxidation [P35145; P35147]	0.000283344	0	2	4	2	E9Q8K5; A2ASS6	E9Q8K5 [33388-33410]; A2ASS6 [35134-35156]	0	2770.34	0	37.6	35.1	15.99	24.11	Shared	High	High	High	High	High	High	High	High	High	High	High	High	-2.71	-2.71	0	1.196e-05	4.785e-05	0.0002901	4.34	25	39.3	41.1	41.5	26.5	35.9	51.4	26.7	38.4	35.1	35
Medium	Titin OS=Mus musculus OX=10090 GN=Ttn PE=1 SV=1 Titin OS=Mus musculus OX=10090 GN=Ttn PE=1 SV=1 Isoform 3 of Titin OS=Mus musculus OX=10090 GN=Ttn	[K].TQTTTMATGPEVPPPWK.[Q]	2xOxidation [P10; P13]; 1xTMT6plex [K17]; 1xTMT6plex [N-Term]	E9Q8K5 2xOxidation [P338; P341]; A2ASS6 2xOxidation [P338; P341]; A2ASS6-3 2xOxidation [P338; P341]	0.235528	0.017594	3	6	3	E9Q8K5; A2ASS6; A2ASS6-3	E9Q8K5 [329-345]; A2ASS6 [329-345]; A2ASS6-3 [329-345]	0	2332.23	0	378.3	326.4	15.03	13.64	Shared	High	High	High	High	High	High	High	High	High	High	Medium	High	-0.43	1.81	0.04822	0.005464	0.4952	0.07905	2.63	5	394.1	287.1	363.1	407.2	455.6	255.1	362.8	358.4	307.1	326.4
Medium	Transcription factor HIVEP3 OS=Mus musculus OX=10090 GN=Hivep3 PE=1 SV=1	[R].EAPAGLER.[A]	1xOxidation [P3]; 1xTMT6plex [N-Term]	A2A884 1xOxidation [P2009]	0.339927	0.0272494	1	1	1	A2A884	A2A884 [2007-2014]	0	1087.59	0	132.9	131.2	12.68	12.58		High	High	High	High	High	High	High	High	High	High	High	n/a	-0.33		0.008725		0.1381			16	148.9	139.6	110.3	138	127.9	143.7	152.3	126.4	109	131.2
High	Transcription initiation factor TFIID subunit 1 OS=Mus musculus OX=10090 GN=Taf1 PE=1 SV=2	[K].IITRPMDLQTLR.[E]	1xDeamidated [Q9]; 2xOxidation [P5; M6]; 1xTMT6plex [N-Term]	Q80UV9 2xOxidation [P1445; ]	0.0595813	0.0044104	1	6	1	Q80UV9	Q80UV9 [1441-1452]	0	1718.97	0					No Quan Values	High	High	High	High	High	High	High	High	High	High	n/a	High		-0.7		0.0009734		0.01375	1.55
High	Transcriptional repressor p66-beta OS=Mus musculus OX=10090 GN=Gatad2b PE=1 SV=1	[K].APSLADR.[Q]	1xOxidation [P2]; 1xTMT6plex [N-Term]	Q8VHR5 1xOxidation [P567]	0.117912	0.00851781	1	2	1	Q8VHR5	Q8VHR5 [566-572]	0	974.547	0	391.6	396.4	10.91	13.25		High	High	High	High	High	High	High	High	High	High	n/a	High		-1.34		0.002447		0.03193	2.32		381.8	314.9	369.7	438.6	408.5	298.2	378.4	410.8	396.4	429.1
Medium	Transient receptor potential cation channel subfamily M member 1 (Fragment) OS=Mus musculus OX=10090 GN=Trpm1 PE=4 SV=1	[R].VSYDTKPDSLLHLMV.[-]	2xOxidation [P7; M14]; 1xTMT6plex [K6]; 1xTMT6plex [N-Term]	A0A0U1RP37 2xOxidation [P11; ]	0.350877	0.0286273	1	1	1	A0A0U1RP37	A0A0U1RP37 [5-19]	0	2208.2	0	80.6	79.4	5.75	8.84		High	High	High	High	High	High	High	High	High	High	n/a	High		6.08		0.009018		0.138	3.62		80.1	75.5	85.3	75.3	81	81.7	78.2	79.4	73.7	92.9
High	Transitional endoplasmic reticulum ATPase OS=Mus musculus OX=10090 GN=Vcp PE=1 SV=4	[R].LGDVISIQPCPDVK.[Y]	1xCarbamidomethyl [C10]; 1xOxidation [P9]; 1xTMT6plex [K14]; 1xTMT6plex [N-Term]	Q01853 1xOxidation [P104]	0.122718	0.00887083	1	1	1	Q01853	Q01853 [96-109]	0	2015.12	0					No Quan Values	High	High	High	High	High	High	High	High	High	High	n/a	High		0.91		0.002594		0.03379	2.95
Medium	Transitional endoplasmic reticulum ATPase OS=Mus musculus OX=10090 GN=Vcp PE=1 SV=4	[R].QAAPCVLFFDELDSIAK.[A]	1xCarbamidomethyl [C5]; 1xOxidation [P4]; 1xTMT6plex [K17]; 1xTMT6plex [N-Term]	Q01853 1xOxidation [P571]	0.189971	0.0135679	1	1	1	Q01853	Q01853 [568-584]	0	2398.27	0	13	10.7	19.01	16.85		High	High	High	High	High	High	High	High	High	High	n/a	High		-0.8		0.004237		0.05933	1.78		13.9	12.8	14	7.7	13.3	15	10.1	10.6	11.9	10.7
High	Transitional endoplasmic reticulum ATPase OS=Mus musculus OX=10090 GN=Vcp PE=1 SV=4	[R].FPSGNQGGAGPSQGSGGGTGGSVYTEDNDDDLYG.[-]	1xDeamidated [Q/N]; 1xOxidation [P11]; 1xTMT6plex [N-Term]	Q01853 1xOxidation [P783]	1.81028e-05	0	1	1	4	Q01853	Q01853 [773-806]	0	3466.46	0	76.2	77.6	11.78	5.45		High	High	High	High	High	High	High	High	High	High	High	High	13.12	13.12	0	2.328e-05	2.199e-06	0.0004474	3.46	12	89.4	70.9	77.5	75.5	62.3	83.8	82	77.6	73	77
High	Transitional endoplasmic reticulum ATPase OS=Mus musculus OX=10090 GN=Vcp PE=1 SV=4	[R].ETVVEVPQVTWEDIGGLEDVK.[R]	1xOxidation [P7]; 1xTMT6plex [K21]; 1xTMT6plex [N-Term]	Q01853 1xOxidation [P472]	6.34625e-06	0	1	1	4	Q01853	Q01853 [466-486]	0	2816.5	0	117.8	118.9	5.09	3.63		High	High	High	High	High	High	High	High	High	High	High	High	-3.29	2.52	0	0	3.317e-06	4.482e-06	4.33	14	112.8	119.8	121.5	115.9	108.6	113.6	123.2	113.2	118.9	119.7
High	Transitional endoplasmic reticulum ATPase OS=Mus musculus OX=10090 GN=Vcp PE=1 SV=4	[K].VVETDPSPYCIVAPDTVIHCEGEPIKR.[E]	2xCarbamidomethyl [C10; C20]; 1xOxidation [P8]; 1xTMT6plex [K26]; 1xTMT6plex [N-Term]	Q01853 1xOxidation [P172]	2.00708e-06	0	1	1	2	Q01853	Q01853 [165-191]	1	3555.82	0	41	43.9	12.81	15.36		High	High	High	High	High	High	High	High	High	High	High	High	1.99	1.99	0	0	1.867e-07	2.094e-07	5.77	13	39.4	47.7	42.7	31.8	41.8	38.1	46.5	39.7	43.9	55.4
High	Transitional endoplasmic reticulum ATPase OS=Mus musculus OX=10090 GN=Vcp PE=1 SV=4	[K].GPELLTMWFGESEANVR.[E]	2xOxidation [P2; M7]; 1xTMT6plex [N-Term]	Q01853 2xOxidation [P545; ]	0.0171607	0.000799344	1	1	15	Q01853	Q01853 [544-560]	0	2197.08	0	565.9	612.3	6.04	3.95		High	High	High	High	High	High	High	High	High	High	High	High	0.16	-1.17	0.0002427	0.00196	0.004628	0.02645	2.65	8	536.3	622.1	608.5	570.4	544	620.2	578.1	576.3	612.3	626.6
High	Transmembrane protein 109 OS=Mus musculus OX=10090 GN=Tmem109 PE=1 SV=2	[R].EFASPGQQK.[K]	1xOxidation [P5]; 1xTMT6plex [K9]; 1xTMT6plex [N-Term]	Q3UBX0 1xOxidation [P42]	0.0101663	0.000520251	1	5	6	Q3UBX0	Q3UBX0 [38-46]	0	1465.81	0	640.8	679.9	4.84	5.08		High	High	High	High	High	High	High	High	High	High	High	High	-1.08	2.52	0.000183	0.0006075	0.002581	0.008848	3.99	2	648.1	609.1	696.9	633.6	621.4	742	685.9	679.9	658.7	655.5
Medium	Transmembrane protein 132A OS=Mus musculus OX=10090 GN=Tmem132a PE=1 SV=2	[R].ALIPLAK.[A]	1xOxidation [P4]; 1xTMT6plex [K7]; 1xTMT6plex [N-Term]	Q922P8 1xOxidation [P397]	0.378212	0.0315764	1	2	1	Q922P8	Q922P8 [394-400]	0	1199.81	0	354.2	379.2	12.68	18.51		Medium	Medium	Medium	Medium	Medium	Medium	Medium	Medium	Medium	Medium	n/a	Medium		-0.23		0.01008		0.1535	1.24		315.7	292.1	364.3	419.2	344.5	379.2	285.2	474.2	419.9	354.6
Medium	Transmembrane protein 132E OS=Mus musculus OX=10090 GN=Tmem132e PE=1 SV=1	[R].IGSISLFRPPPRR.[A]	2xOxidation [P10; P11]; 1xTMT6plex [N-Term]	Q6IEE6 2xOxidation [P190; P191]	0.36664	0.0301802	1	2	4	Q6IEE6	Q6IEE6 [181-193]	1	1757.04	0	120.8	120.1	8.38	7.5		High	High	High	High	High	High	High	High	High	High	High	Medium	-4.22	-4.77	0.009693	0.04642	0.151	0.5223	2.77	3	120.3	121.4	135.9	106.6	130.9	120.1	118.8	111.2	135.2	128
High	Trifunctional enzyme subunit alpha, mitochondrial OS=Mus musculus OX=10090 GN=Hadha PE=1 SV=1	[K].EVESVTPEHCIFASNTSALPINQIAAVSK.[R]	1xCarbamidomethyl [C10]; 1xOxidation [P]; 1xTMT6plex [K29]; 1xTMT6plex [N-Term]	Q8BMS1 1xOxidation [P]	1.16631e-06	0	1	1	4	Q8BMS1	Q8BMS1 [461-489]	0	3586.88	0	40.6	39.8	17.78	13.83		High	High	High	High	High	High	High	High	High	High	High	High	2.05	2.05	0	0	1.02e-07	1.791e-05	4.41	6	41.5	54.8	43.1	39.6	32.9	34.5	39.8	38.7	49.7	39.8
High	Trifunctional enzyme subunit alpha, mitochondrial OS=Mus musculus OX=10090 GN=Hadha PE=1 SV=1	[K].TVLGVPEVLLGILPGAGGTQR.[L]	1xDeamidated [Q20]; 1xOxidation [P14]; 1xTMT6plex [N-Term]	Q8BMS1 1xOxidation [P180]	4.20411e-06	0	1	1	2	Q8BMS1	Q8BMS1 [167-187]	0	2293.33	0	19.1	17.1	20.5	8.42		High	High	High	High	High	High	High	High	High	High	High	High	14.2	14.2	0	0	4.275e-07	2.811e-06	4.1	44	19.9	21.8	19	13.9	12.6	15.7	17.6	15.2	18.7	17.1
High	Trifunctional enzyme subunit alpha, mitochondrial OS=Mus musculus OX=10090 GN=Hadha PE=1 SV=1	[K].TVLGVPEVLLGILPGAGGTQR.[L]	1xOxidation [P6]; 1xTMT6plex [N-Term]	Q8BMS1 1xOxidation [P172]	7.65261e-06	0	1	1	9	Q8BMS1	Q8BMS1 [167-187]	0	2292.35	0	82.2	85.1	12.62	14.63		High	High	High	High	High	High	High	High	High	High	High	High	-0.37	-0.37	0	0	8.339e-07	5.785e-07	5.61	36	76.3	102.4	83.4	82.5	81.9	95.8	73.1	66.1	88.4	85.1
High	Trifunctional purine biosynthetic protein adenosine-3 OS=Mus musculus OX=10090 GN=Gart PE=1 SV=3	[K].QVLVAPGNAGTACAGK.[I]	1xCarbamidomethyl [C13]; 2xDeamidated [Q1; N8]; 1xOxidation [P6]; 1xTMT6plex [K16]; 1xTMT6plex [N-Term]	Q64737 1xOxidation [P34]	0.081528	0.00592114	1	5	1	Q64737	Q64737 [29-44]	0	1990.07	0					No Quan Values	High	High	High	High	High	High	High	High	High	High	n/a	High		-6.47		0.001409		0.02024	1.24
Medium	Triosephosphate isomerase OS=Mus musculus OX=10090 GN=Tpi1 PE=1 SV=4	[K].VTNGAFTGEISPGMIK.[D]	1xDeamidated [N3]; 2xOxidation [P12; M14]; 1xTMT6plex [K16]; 1xTMT6plex [N-Term]	P17751 2xOxidation [P131; ]	0.225812	0.0166415	1	1	1	P17751	P17751 [120-135]	0	2113.13	0					No Quan Values	High	High	High	High	High	High	High	High	High	High	High	n/a	4.61		0.005101		0.08615			1
High	Triosephosphate isomerase OS=Mus musculus OX=10090 GN=Tpi1 PE=1 SV=4	[K].VVLAYEPVWAIGTGK.[T]	1xOxidation [P7]; 1xTMT6plex [K15]; 1xTMT6plex [N-Term]	P17751 1xOxidation [P217]	0.000237228	0	1	2	8	P17751	P17751 [211-225]	0	2077.21	0	403.7	406.6	5.12	7.08		High	High	High	High	High	High	High	High	High	High	High	High	-0.77	-0.77	0	1.196e-05	3.902e-05	0.0001005	4.79	43	402.4	387.7	421	405.1	374.3	366.1	406.6	437.6	425.9	388.5
High	Tripartite motif-containing protein 72 OS=Mus musculus OX=10090 GN=Trim72 PE=1 SV=1	[R].LPGPVYPIFDVCWHDK.[G]	1xCarbamidomethyl [C12]; 1xOxidation [P7]; 1xTMT6plex [K16]; 1xTMT6plex [N-Term]	Q1XH17 1xOxidation [P451]	0.109667	0.00794805	1	1	4	Q1XH17	Q1XH17 [445-460]	0	2417.27	0	66.8	65.4	7.37	4.83		High	High	High	High	High	High	High	High	High	High	High	High	0.81	0.81	0.003505	0.006007	0.05876	0.08823	2.92	2	61.1	59.1	71	65.5	68.3	59.4	66.1	65.4	64.4	67.7
High	Tripartite motif-containing protein 72 OS=Mus musculus OX=10090 GN=Trim72 PE=1 SV=1	[R].LVEGLAQVPQGHCEEHLDPLSIYCEQDR.[T]	2xCarbamidomethyl [C13; C24]; 1xOxidation [P]; 1xTMT6plex [N-Term]	Q1XH17 1xOxidation [P]	1.72862e-08	0	1	1	13	Q1XH17	Q1XH17 [74-101]	0	3537.69	0	340.6	325.4	3.76	2.77		High	High	High	High	High	High	High	High	High	High	High	High	-2.58	2.49	0	0	4.898e-06	2.081e-07	6.36	23	325.4	339.6	343.9	336.2	364.5	325	326.7	308.8	333	325.4
High	Tripartite motif-containing protein 72 OS=Mus musculus OX=10090 GN=Trim72 PE=1 SV=1	[R].VAGEPAADGTVACPCCQAPTRPQALSTNLQLSR.[L]	3xCarbamidomethyl [C13; C15; C16]; 1xOxidation [P14]; 1xTMT6plex [N-Term]	Q1XH17 1xOxidation [P54]	2.7095e-09	0	1	1	4	Q1XH17	Q1XH17 [41-73]	0	3741.83	0	37.9	37.7	15.68	6.31		High	High	High	High	High	High	High	High	High	High	High	High	0.4	0.4	0	0	1.228e-10	8.236e-10	6.43	18	33.9	44.4	43.6	31.6	32.5	36.3	37.7	37.7	42.5	40
High	Tripartite motif-containing protein 72 OS=Mus musculus OX=10090 GN=Trim72 PE=1 SV=1	[R].QELSCPLCLQLFDAPVTAECGHSFCR.[A]	4xCarbamidomethyl [C5; C8; C20; C25]; 1xOxidation [P]; 1xTMT6plex [N-Term]	Q1XH17 1xOxidation [P]	1.76094e-07	0	1	1	15	Q1XH17	Q1XH17 [10-35]	0	3340.54	0	77.4	83.6	11.38	9.33		High	High	High	High	High	High	High	High	High	High	High	High	-1.34	1.02	0	0	0.0001391	3.421e-05	5.44	6	77.1	99.7	75.2	77.1	77.7	83.6	77.8	80.9	96.9	92.5
Medium	Tropomodulin-1 OS=Mus musculus OX=10090 GN=Tmod1 PE=1 SV=2 Tropomodulin-3 OS=Mus musculus OX=10090 GN=Tmod3 PE=1 SV=1	[RK].NIPIPTLK.[AED]	1xOxidation [P5]; 1xTMT6plex [K8]; 1xTMT6plex [N-Term]	P49813 1xOxidation [P211]; Q9JHJ0 1xOxidation [P214]	0.259427	0.019543	2	5	3	P49813; Q9JHJ0	P49813 [207-214]; Q9JHJ0 [210-217]	0	1369.88	0	713.4	719.3	9.12	5.06	Shared	High	High	High	High	High	High	High	High	High	High	n/a	High		-1.58		0.006114		0.09064	1.66		722	704.9	639.2	775.8	787.4	664.1	693.9	722.7	761.1	719.3
High	Troponin I, cardiac muscle OS=Mus musculus OX=10090 GN=Tnni3 PE=1 SV=2	[R].CQPLELDGLGFEELQDLCR.[Q]	2xCarbamidomethyl [C1; C18]; 1xDeamidated [Q2]; 1xOxidation [P3]; 1xTMT6plex [N-Term]	P48787 1xOxidation [P83]	0.0120001	0.000551893	1	4	4	P48787	P48787 [81-99]	0	2538.21	0	43.9	44.3	5.73	13.86		High	High	High	High	High	High	High	High	High	High	High	High	8.32	5.67	0.0001933	0.007092	0.003119	0.1087	3.54	19	40.9	47.5	46.2	42.4	45	44.3	42.2	38.2	51.4	53.4
High	Troponin I, cardiac muscle OS=Mus musculus OX=10090 GN=Tnni3 PE=1 SV=2	[R].CQPLELDGLGFEELQDLCR.[Q]	2xCarbamidomethyl [C1; C18]; 1xOxidation [P3]; 1xTMT6plex [N-Term]	P48787 1xOxidation [P83]	6.11306e-06	0	1	4	10	P48787	P48787 [81-99]	0	2537.22	0	219.1	204.6	5.79	9.81		High	High	High	High	High	High	High	High	High	High	High	High	-1.49	1.91	0	0	1.508e-05	2.443e-05	5.75	47	215.5	217.2	221.2	190.3	221	199.3	204.6	192.1	214.6	245.2
High	Tubulin alpha chain (Fragment) OS=Mus musculus OX=10090 GN=Tuba4a PE=1 SV=1	[R].SIQFVDWCPTGFK.[V]	1xCarbamidomethyl [C8]; 1xOxidation [P9]; 1xTMT6plex [K13]; 1xTMT6plex [N-Term]	A0A0A0MQA5 1xOxidation [P377]	0.00293955	0.000252531	1	3	4	A0A0A0MQA5	A0A0A0MQA5 [369-381]	0	2059.07	0	164.1	170.8	8.19	6.52		High	High	High	High	High	High	High	High	High	High	High	High	1.45	-0.23	5.759e-05	0.0001969	0.000646	0.002372	3.6	18	169.8	158.5	183.7	158.1	148.3	162.6	164.5	190.9	173.8	170.8
High	Tubulin alpha-8 chain OS=Mus musculus OX=10090 GN=Tuba8 PE=1 SV=1	[K].AYHEQLSVAEITSSCFEPNSQMVK.[C]	1xCarbamidomethyl [C15]; 1xDeamidated [Q21]; 1xOxidation [P18]; 1xTMT6plex [K24]; 1xTMT6plex [N-Term]	Q9JJZ2 1xOxidation [P298]	0.000228519	0	1	1	3	Q9JJZ2	Q9JJZ2 [281-304]	0	3230.57	0	153.8	154.4	2.81	2.43		High	High	High	High	High	High	High	High	High	High	High	High	6.06	6.06	0	1.196e-05	3.742e-05	0.0002948	7.03	15	147.2	157.2	150.7	155.8	158.4	150.9	150.3	154.8	154.4	159.6
High	Tubulin alpha-8 chain OS=Mus musculus OX=10090 GN=Tuba8 PE=1 SV=1 Tubulin alpha-1A chain OS=Mus musculus OX=10090 GN=Tuba1a PE=1 SV=1 Tubulin alpha-1C chain OS=Mus musculus OX=10090 GN=Tuba1c PE=1 SV=1 Tubulin alpha chain (Fragment) OS=Mus musculus OX=10090 GN=Tuba4a PE=1 SV=1	[R].NLDIERPTYTNLNR.[L]	1xOxidation [P7]; 1xTMT6plex [N-Term]	Q9JJZ2 1xOxidation [P222]; P68369 1xOxidation [P222]; P68373 1xOxidation [P222]; A0A0A0MQA5 1xOxidation [P251]	0.0643498	0.00459211	4	8	1	Q9JJZ2; P68369; P68373; A0A0A0MQA5	Q9JJZ2 [216-229]; P68369 [216-229]; P68373 [216-229]; A0A0A0MQA5 [245-258]	0	1964.04	0	146.3	152.1	4.57	9.16	Shared	High	High	High	High	High	High	High	High	High	High	n/a	High		0.07		0.001034		0.01508	4.04		140.6	151.6	146.5	133.1	148.5	133.3	154	152.1	136.6	166.5
High	Tuftelin-interacting protein 11 OS=Mus musculus OX=10090 GN=Tfip11 PE=1 SV=1	[R].AVSSNVGAYMQPGAR.[E]	2xDeamidated [N5; Q11]; 1xOxidation [P12]; 1xTMT6plex [N-Term]	Q9ERA6 1xOxidation [P726]	0.0585672	0.00431013	1	1	1	Q9ERA6	Q9ERA6 [715-729]	0	1754.86	0	51.4	52.4	17.67	12.33		High	High	High	High	High	High	High	High	High	High	n/a	High		-1.36		0.0009734		0.0135	1.87		73.6	50.3	52.6	47.1	53.4	45.5	45.3	52.4	59	57.2
High	Tumor protein D54 OS=Mus musculus OX=10090 GN=Tpd52l2 PE=1 SV=1	[R].ENGSDNLPPSPGSGDQTLPDHAPF.[-]	1xDeamidated [N2]; 5xOxidation [P8; P9; P11; P19; P23]; 1xTMT6plex [N-Term]	Q9CYZ2 5xOxidation [P204; P205; P207; P215; P219]	0.0162448	0.000783181	1	1	1	Q9CYZ2	Q9CYZ2 [197-220]	0	2759.21	0	56.6	66.6	12.28	8.82		High	High	High	High	High	High	High	High	High	High	High	n/a	-3.19		0.0002356		0.004366			3	68.6	57.4	60.9	47.2	55.8	69	65.5	71.9	56.5	66.6
High	Ubiquitin carboxyl-terminal hydrolase 5 OS=Mus musculus OX=10090 GN=Usp5 PE=1 SV=1	[R].GTGLQPGEEELPDIAPPLVTPDEPK.[GA]	1xDeamidated [Q5]; 1xOxidation [P]; 1xTMT6plex [K25]; 1xTMT6plex [N-Term]	P56399 1xOxidation [P]	7.36821e-05	0	1	2	2	P56399	P56399 [604-628]	0	3074.62	0	55.3	52.5	4.07	6.42		High	High	High	High	High	High	High	High	High	High	High	High	14.3	14.3	0	4.981e-05	1.052e-05	0.000741	4.68	34	56.9	54.1	55.3	57.4	51.2	46.8	49.3	52.5	54.9	53.7
High	Ubiquitin carboxyl-terminal hydrolase 5 OS=Mus musculus OX=10090 GN=Usp5 PE=1 SV=1	[R].GTGLQPGEEELPDIAPPLVTPDEPK.[G]	5xOxidation [P12; P16; P17; P21; P24]; 1xTMT6plex [K25]; 1xTMT6plex [N-Term]	P56399 5xOxidation [P615; P619; P620; P624; P627]	0.000260479	0	1	1	2	P56399	P56399 [604-628]	0	3137.61	0	171.5	213.3	38.76	28.36		High	High	High	High	High	High	High	High	High	High	High	n/a	-1.12		0		4.331e-05			16	134.3	302.8	219.1	131.3	118.2	280.3	213.3	255.7	129.9	178.8
Medium	Ubiquitin carboxyl-terminal hydrolase 8 OS=Mus musculus OX=10090 GN=Usp8 PE=1 SV=1	[R].LSTQPALAGPGAAPR.[A]	1xDeamidated [Q4]; 2xOxidation [P5; P10]; 1xTMT6plex [N-Term]	A2AI52 2xOxidation [P389; P394]	0.427143	0.037726	1	2	1	A2AI52	A2AI52 [385-399]	0	1668.91	0	171.9	172.1	7.94	5.74		Medium	Medium	Medium	Medium	Medium	Medium	Medium	Medium	Medium	Medium	n/a	Medium		0.84		0.0124		0.1826	2.48		170.7	173.1	181.2	156.2	193.5	166.1	165.9	172.1	190.2	176.5
Medium	Ubiquitin carboxyl-terminal hydrolase isozyme L3 OS=Mus musculus OX=10090 GN=Uchl3 PE=1 SV=2	[R].WLPLEANPEVTNQFLK.[Q]	2xOxidation [P3; P8]; 1xTMT6plex [K16]; 1xTMT6plex [N-Term]	Q9JKB1 2xOxidation [P8; P13]	0.247259	0.0184275	1	2	2	Q9JKB1	Q9JKB1 [6-21]	0	2389.32	0	94.8	90.5	6.57	9.29		High	High	High	High	High	High	High	High	High	High	High	High	1.33	1.33	0.005756	0.009849	0.09595	0.1506	2.92	10	95.5	100.5	87.6	94.2	85.7	90.5	84.9	104.4	102.7	88.7
High	Ubiquitin-conjugating enzyme E2 L3 OS=Mus musculus OX=10090 GN=Ube2l3 PE=1 SV=1	[R].NIQVDEANLLTWQGLIVPDNPPYDK.[G]	2xOxidation [P18; P21]; 1xTMT6plex [K25]; 1xTMT6plex [N-Term]	P68037 2xOxidation [P41; P44]	1.17728e-06	0	1	3	4	P68037	P68037 [24-48]	0	3342.76	0	202.9	200.3	10.91	6.67		High	High	High	High	High	High	High	High	High	High	High	High	-1.58	-0.68	0	0	1.03e-07	9.8e-07	5.74	33	154.8	210.7	203.4	212.1	191.8	189.6	220.7	195.9	200.3	217.6
High	Ubiquitin-like modifier-activating enzyme 1 OS=Mus musculus OX=10090 GN=Uba1 PE=1 SV=1	[R].FEVQGLQPNGEEMTLK.[Q]	1xOxidation [P/M]; 1xTMT6plex [K16]; 1xTMT6plex [N-Term]	Q02053 1xOxidation [P]	0.00260531	0.000211203	1	1	2	Q02053	Q02053 [958-973]	0	2294.21	0					No Quan Values	High	High	High	High	High	High	High	High	High	High	High	High	1.18	1.18	5.274e-05	0.0005213	0.0005683	0.007696	3.2	6
High	UBX domain-containing protein 1 OS=Mus musculus OX=10090 GN=Ubxn1 PE=1 SV=1	[R].SSPPATDPGPVPSSPSQEPPTK.[R]	5xOxidation [P3; P4; P8; P10; P12]; 1xTMT6plex [K22]; 1xTMT6plex [N-Term]	Q922Y1 5xOxidation [P189; P190; P194; P196; P198]	0.00198999	0.000188861	1	1	1	Q922Y1	Q922Y1 [187-208]	0	2698.35	0	62.7	63.8	9.79	7.42		High	High	High	High	High	High	High	High	High	High	High	n/a	-3.24		4.271e-05		0.0004199			12	66.4	53.2	59.3	57	67	63.8	64.4	62.6	67.6	55
Medium	Uncharacterized protein C6orf47 homolog OS=Mus musculus OX=10090 GN=D17h6s53e PE=1 SV=1	[K].ADLPAPEPR.[W]	1xOxidation [P4]; 1xTMT6plex [N-Term]	Q9Z1R4 1xOxidation [P25]	0.511235	0.049519	1	1	1	Q9Z1R4	Q9Z1R4 [22-30]	0	1210.66	0	336	352.8	8.38	5.01		Medium	Medium	Medium	Medium	Medium	Medium	Medium	Medium	Medium	Medium	n/a	Medium		0.89		0.01829		0.2354	1.52		323.2	322.1	349.3	296.8	361.5	326.7	362.6	366.8	352.8	334.5
Medium	UPF0606 protein KIAA1549 OS=Mus musculus OX=10090 GN=Kiaa1549 PE=1 SV=3	[K].LDFQPDTVANIQQR.[Q]	2xDeamidated [Q12; Q13]; 1xOxidation [P5]; 1xTMT6plex [N-Term]	Q68FD9 1xOxidation [P1322]	0.48862	0.0467412	1	2	1	Q68FD9	Q68FD9 [1318-1331]	0	1891.96	0	229.5	236.4	22.29	94.11		Medium	Medium	Medium	Medium	Medium	Medium	Medium	Medium	Medium	Medium	n/a	Medium		0.61		0.01673		0.2211	2.5		200.8	344	242	199.2	249.9	1126.2	346.1	236.4	197	207.5
High	UTP--glucose-1-phosphate uridylyltransferase OS=Mus musculus OX=10090 GN=Ugp2 PE=1 SV=3	[R].LVEIAQVPK.[A]	1xOxidation [P8]; 1xTMT6plex [K9]; 1xTMT6plex [N-Term]	Q91ZJ5 1xOxidation [P311]	0.0871519	0.00629598	1	2	2	Q91ZJ5	Q91ZJ5 [304-312]	0	1470.93	0					No Quan Values	High	High	High	High	High	High	High	High	High	High	High	High	-1.32	-1.32	0.002491	0.001565	0.03944	0.02196	2.28	21
Medium	Very long-chain specific acyl-CoA dehydrogenase, mitochondrial OS=Mus musculus OX=10090 GN=Acadvl PE=1 SV=3 Very long-chain-specific acyl-CoA dehydrogenase, mitochondrial OS=Mus musculus OX=10090 GN=Acadvl PE=1 SV=1	[R].SSAIPSPCGK.[Y]	1xCarbamidomethyl [C8]; 1xOxidation [P7]; 1xTMT6plex [K10]; 1xTMT6plex [N-Term]	P50544 1xOxidation [P237]; B1AR28 1xOxidation [P215]	0.302588	0.0231722	2	2	5	P50544; B1AR28	P50544 [231-240]; B1AR28 [209-218]	0	1477.81	0	368.5	361.6	10.78	9.04	Shared	High	High	High	High	High	High	High	High	High	High	High	Medium	2.8	-1.37	0.00733	0.01116	0.1207	0.1688	2.04	9	366.2	348.8	446.1	356.6	433.2	419	345.8	352.8	410.4	361.6
High	Very long-chain specific acyl-CoA dehydrogenase, mitochondrial OS=Mus musculus OX=10090 GN=Acadvl PE=1 SV=3 Very long-chain-specific acyl-CoA dehydrogenase, mitochondrial OS=Mus musculus OX=10090 GN=Acadvl PE=1 SV=1	[K].ELGAFGLQVPSELGGLGLSNTQYAR.[L]	1xDeamidated [Q8]; 1xOxidation [P10]; 1xTMT6plex [N-Term]	P50544 1xOxidation [P148]; B1AR28 1xOxidation [P126]	4.36621e-08	0	2	2	2	P50544; B1AR28	P50544 [139-163]; B1AR28 [117-141]	0	2823.47	0					No Quan Values	High	High	High	High	High	High	High	High	High	High	High	High	13.95	13.95	0	0	2.555e-09	1.278e-07	5.08	30
High	Very long-chain specific acyl-CoA dehydrogenase, mitochondrial OS=Mus musculus OX=10090 GN=Acadvl PE=1 SV=3 Very long-chain-specific acyl-CoA dehydrogenase, mitochondrial OS=Mus musculus OX=10090 GN=Acadvl PE=1 SV=1	[K].ELGAFGLQVPSELGGLGLSNTQYAR.[L]	1xOxidation [P10]; 1xTMT6plex [N-Term]	P50544 1xOxidation [P148]; B1AR28 1xOxidation [P126]	0.0105483	0.000551893	2	2	1	P50544; B1AR28	P50544 [139-163]; B1AR28 [117-141]	0	2822.49	0	326.2	323.1	4.11	2.7	Shared	High	High	High	High	High	High	High	High	High	High	n/a	High		-1.09		0.0001354		0.001721	3.26		319.5	315.6	339.4	333.1	341.8	327.6	315.8	323.1	316.4	337
High	Vesicle-fusing ATPase OS=Mus musculus OX=10090 GN=Nsf PE=1 SV=2	[K].IDGVEQLNNILVIGMTNRPDLIDEALLRPGR.[L]	1xOxidation [P29]; 1xTMT6plex [N-Term]	P46460 1xOxidation [P386]	0.00139752	0.000123263	1	1	1	P46460	P46460 [358-388]	0	3690.02	0	33.3	27.9	12.93	13.15		High	High	High	High	High	High	High	High	High	High	n/a	High		1.42		1.196e-05		0.0001549	3.29		31	35.7	27.8	36.6	37.7	24.4	27.9	26.6	30.9	34.1
High	Voltage-dependent anion-selective channel protein 1 OS=Mus musculus OX=10090 GN=Vdac1 PE=1 SV=3	[R].EHINLGCDVDFDIAGPSIR.[G]	1xCarbamidomethyl [C7]; 1xOxidation [P16]; 1xTMT6plex [N-Term]	Q60932 1xOxidation [P149]	0.00085292	5.03951e-05	1	3	12	Q60932	Q60932 [134-152]	0	2373.17	0	697.8	713.8	2.37	17.21		High	High	High	High	High	High	High	High	High	High	High	High	-0.15	0.48	0	0.0003192	0.000164	0.004468	3.31	12	703.7	691.9	690.9	717.7	681.7	678.3	653.3	971.7	716.7	713.8
High	Voltage-dependent anion-selective channel protein 1 OS=Mus musculus OX=10090 GN=Vdac1 PE=1 SV=3	[K].YQVDPDACFSAK.[V]	1xCarbamidomethyl [C8]; 1xOxidation [P5]; 1xTMT6plex [K12]; 1xTMT6plex [N-Term]	Q60932 1xOxidation [P242]	0.00722305	0.000425444	1	2	26	Q60932	Q60932 [238-249]	0	1874.94	0	1706.6	1743.6	5.08	4.43		High	High	High	High	High	High	High	High	High	High	High	High	-1.36	-1.36	0.0001257	0.0003928	0.001754	0.005641	3.01	24	1539.1	1680.9	1772.7	1732.6	1676.1	1620.1	1771.6	1743.6	1807.3	1670.2
Medium	Voltage-dependent P/Q-type calcium channel subunit alpha-1A OS=Mus musculus OX=10090 GN=Cacna1a PE=1 SV=2	[K].IGNSTNPGPALATNPQNAASRR.[T]	1xOxidation [P15]; 1xTMT6plex [N-Term]	P97445 1xOxidation [P1069]	0.458539	0.0423285	1	3	1	P97445	P97445 [1055-1076]	1	2452.29	0	392.6	370.3	2.26	8.53		Medium	Medium	Medium	Medium	Medium	Medium	Medium	Medium	Medium	Medium	n/a	Medium		-2		0.01468		0.2023	2.99		387.9	381.7	396.2	398.1	388.9	360.7	433.4	370.3	410.4	360.7
Medium	Vomeronasal type-1 receptor 41 OS=Mus musculus OX=10090 GN=Vmn1r41 PE=4 SV=1	[K].GPPGPSCCS.[-]	2xCarbamidomethyl [C7; C8]; 3xOxidation [P2; P3; P5]; 1xTMT6plex [N-Term]	A0A2I3BQ84 3xOxidation [P74; P75; P77]	0.232255	0.0172736	1	1	1	A0A2I3BQ84	A0A2I3BQ84 [73-81]	0	1195.49	0					No Quan Values	High	High	High	High	High	High	High	High	High	High	n/a	High		-1.33		0.005364		0.07749	0.02
Medium	WD repeat domain phosphoinositide-interacting protein 4 (Fragment) OS=Mus musculus OX=10090 GN=Wdr45 PE=1 SV=6	[K].LVLEFTFTKPVLAVRM.[-]	1xOxidation [P10]; 1xTMT6plex [K9]; 1xTMT6plex [N-Term]	A0A0A0MQH0 1xOxidation [P104]	0.14141	0.0101571	1	1	10	A0A0A0MQH0	A0A0A0MQH0 [95-110]	1	2338.4	0	442.1	442.5	14.49	12.55		High	High	High	High	High	High	High	High	High	High	n/a	High		2.41		0.003094		0.04041	1.58		450.8	357.8	433.6	430.4	507.4	337.3	442.5	467.3	392.5	445.8
High	WD repeat-containing protein 1 OS=Mus musculus OX=10090 GN=Wdr1 PE=1 SV=3	[R].LATGSDDNCAAFFEGPPFK.[F]	1xCarbamidomethyl [C9]; 1xOxidation [P16]; 1xTMT6plex [K19]; 1xTMT6plex [N-Term]	O88342 1xOxidation [P177]	0.000419554	0	1	1	6	O88342	O88342 [162-180]	0	2518.23	0	52.7	55.6	13.69	6.35		High	High	High	High	High	High	High	High	High	High	High	High	0.35	0.35	0	3.999e-05	7.411e-05	0.0005354	2.14	9	60.8	47.5	56.4	49.2	60.4	55.6	50	50.1	57.2	55.9
High	Werner syndrome ATP-dependent helicase homolog OS=Mus musculus OX=10090 GN=Wrn PE=1 SV=3	[R].LLPLTAAGMHLAQAVK.[A]	1xDeamidated [Q13]; 1xOxidation [P3]; 1xTMT6plex [K16]; 1xTMT6plex [N-Term]	O09053 1xOxidation [P1248]	0.108783	0.00788489	1	2	85	O09053	O09053 [1246-1261]	0	2109.25	0	4071.2	4186.9	1.46	1.94		High	High	High	High	High	High	High	High	High	High	Medium	High	-3.66	-1.76	0.01337	0.006597	0.1914	0.09897	3.56	6	4040.9	4115.3	4169.1	4056.3	4086.2	4155.3	4186.9	4227.5	4190.5	4018.8
Medium	Werner syndrome ATP-dependent helicase homolog OS=Mus musculus OX=10090 GN=Wrn PE=1 SV=3	[R].LLPLTAAGMHLAQAVK.[A]	1xDeamidated [Q13]; 2xOxidation [P3; M9]; 1xTMT6plex [K16]; 1xTMT6plex [N-Term]	O09053 2xOxidation [P1248; ]	0.373552	0.0310775	1	2	1	O09053	O09053 [1246-1261]	0	2125.25	0	68.1	65.7	4.18	6.94		High	High	High	High	High	High	High	High	High	High	n/a	High		-4.77		0.009891		0.1511	3.84		65	69.5	70.3	66.7	66	65.1	67.8	65.7	66.8	56.6
Medium	Werner syndrome ATP-dependent helicase homolog OS=Mus musculus OX=10090 GN=Wrn PE=1 SV=3	[R].LLPLTAAGMHLAQAVK.[A]	2xOxidation [P3; M9]; 1xTMT6plex [K16]; 1xTMT6plex [N-Term]	O09053 2xOxidation [P1248; ]	0.445274	0.0405564	1	2	3	O09053	O09053 [1246-1261]	0	2124.26	0	158.3	156.1	9.5	9.87		Medium	Medium	Medium	Medium	Medium	Medium	Medium	Medium	Medium	Medium	Medium	Medium	-3.53	-3.53	0.02467	0.01364	0.3096	0.194	3.77	8	156.3	139.7	177.4	137.9	160.9	129.3	160.7	156.1	163	138.9
Medium	Xin actin-binding repeat-containing protein 1 OS=Mus musculus OX=10090 GN=Xirp1 PE=1 SV=1	[R].LGSRPSIQEQSPLELR.[S]	1xOxidation [P5]; 1xTMT6plex [N-Term]	E9QQ93 1xOxidation [P207]	0.199937	0.0144804	1	2	1	E9QQ93	E9QQ93 [203-218]	0	2055.14	0	71.1	79.1	12.89	13.6		High	High	High	High	High	High	High	High	High	High	n/a	High		2.18		0.004522		0.06366	3.02		71.6	77.2	87.6	60.8	66	79.8	56.6	75.8	80.5	79.1
Medium	Zinc finger homeobox protein 3 OS=Mus musculus OX=10090 GN=Zfhx3 PE=1 SV=1	[K].DLALSNPSISNSPLMPNVLQTLSR.[G]	1xDeamidated [Q20]; 2xOxidation [P7; M15]; 1xTMT6plex [N-Term]	Q61329 2xOxidation [P530; ]	0.378212	0.0315764	1	1	1	Q61329	Q61329 [524-547]	0	2829.49	0	36.2	39.1	5.26	13.79		Medium	Medium	Medium	Medium	Medium	Medium	Medium	Medium	Medium	Medium	Medium	n/a	4.27		0.01005		0.1555			3	33.2	33.4	35.9	36.6	36.5	39.5	35.3	34.3	48.1	39.1
Medium	Zinc finger homeobox protein 4 OS=Mus musculus OX=10090 GN=Zfhx4 PE=1 SV=1	[K].NLLSPSSFK.[A]	1xOxidation [P5]; 1xTMT6plex [K9]; 1xTMT6plex [N-Term]	Q9JJN2 1xOxidation [P2707]	0.447906	0.0408988	1	3	2	Q9JJN2	Q9JJN2 [2703-2711]	0	1466.86	0					No Quan Values	Medium	Medium	Medium	Medium	Medium	Medium	Medium	Medium	Medium	Medium	Medium	Medium	0.95	0.95	0.02001	0.01378	0.2588	0.1953	2.71	12
High	Zinc finger protein 235 OS=Mus musculus OX=10090 GN=Znf235 PE=2 SV=1	[R].HSPSVPIQPSVHPGR.[K]	2xOxidation [P3; P6]; 1xTMT6plex [N-Term]	Q61116 2xOxidation [P270; P273]	0.0775283	0.00548932	1	1	7	Q61116	Q61116 [268-282]	0	1856	0	658.6	670.6	5.24	3.54		High	High	High	High	High	High	High	High	High	High	n/a	High		2.03		0.00581		0.08467	3.78		639.8	663.7	653.6	723.1	634.7	637.7	694.9	692	670.6	659.6
Medium	Zinc finger protein 518A OS=Mus musculus OX=10090 GN=Znf518a PE=2 SV=1	[K].QILPSPVLQSNTEK.[N]	1xOxidation [P4]; 1xTMT6plex [K14]; 1xTMT6plex [N-Term]	B2RRF6 1xOxidation [P466]	0.248971	0.0186267	1	1	1	B2RRF6	B2RRF6 [463-476]	0	2028.17	0	440.6	341.9	14.03	10.8		High	High	High	High	High	High	High	High	High	High	High	n/a	-3.11		0.005806		0.09643			0	433.1	448.3	356	497.4	463	333.9	419.3	340	400.2	341.9
High	Zinc finger protein 592 OS=Mus musculus OX=10090 GN=Znf592 PE=1 SV=3	[R].NVEELSSLQSSTDTSSNRPGSR.[A]	1xOxidation [P19]; 1xTMT6plex [N-Term]	Q8BHZ4 1xOxidation [P938]	0.0227503	0.00107996	1	1	1	Q8BHZ4	Q8BHZ4 [920-941]	0	2596.26	0					No Quan Values	High	High	High	High	High	High	High	High	High	High	n/a	High		-0.9		0.0003145		0.00432	1.59
Medium	Zinc finger protein 618 OS=Mus musculus OX=10090 GN=Znf618 PE=2 SV=3	[R].NSANNTTTSGLTPNSVIPEK.[E]	1xOxidation [P18]; 1xTMT6plex [K20]; 1xTMT6plex [N-Term]	Q80YY7 1xOxidation [P461]	0.450549	0.0412852	1	2	4	Q80YY7	Q80YY7 [444-463]	0	2519.34	0					No Quan Values	Medium	Medium	Medium	Medium	Medium	Medium	Medium	Medium	Medium	Medium	Medium	Medium	-4.84	-4.84	0.01317	0.03348	0.1889	0.3791	1.69	5
High	Zinc finger protein 618 OS=Mus musculus OX=10090 GN=Znf618 PE=2 SV=3	[R].APNSGSPASK.[A]	1xOxidation [P2]; 1xTMT6plex [K10]; 1xTMT6plex [N-Term]	Q80YY7 1xOxidation [P349]	0.043229	0.00282819	1	3	2	Q80YY7	Q80YY7 [348-357]	0	1389.77	0					No Quan Values	High	High	High	High	High	High	High	High	High	High	High	Medium	-1.93	-0.64	0.0007946	0.026	0.01322	0.3039	1.44	11
High	Zinc transporter SLC39A7 OS=Mus musculus OX=10090 GN=Slc39a7 PE=1 SV=2	[R].EAGAPGIK.[H]	1xOxidation [P5]; 1xTMT6plex [K8]; 1xTMT6plex [N-Term]	Q31125 1xOxidation [P131]	0.0762353	0.00544671	1	2	2	Q31125	Q31125 [127-134]	0	1216.73	0					No Quan Values	High	High	High	High	High	High	High	High	High	High	High	High	0.35	0.35	0.005792	0.001263	0.09636	0.01871	2.33	0
[truncated: 2 more columns]

## Sheet: P-OH Promx Fin
FINAL data set for hydroxyproline containing peptides (Figure 1A)																																						Table for Figure 1B
Abundance of each P-OH peptide normalized to abundance of the parent protein																				1.5		0.05
Table in Figure 1B over on the right -->																				0.75
Accession	Description	Annotated Seq	Modifications	Positions	WT1	WT2	WT3	WT4	WT5	KO1	KO2	KO3	KO4	KO5	KO/WT1	KO/WT2	KO/WT3	KO/WT4	KO/WT5	Av FC	SD	P	LogFC	LogP														Less P-OH							Raw P-OH values
Q61425	Hydroxyacyl-coenzyme A dehydrogenase, mitochondrial OS=Mus musculus OX=10090 GN=Hadh PE=1 SV=2	[K].LGAGYPMGPFELLDYVGLDTTK.[F]	Q61425 2xOxidation [P255; ]	Q61425 [250-271]	0.000164398	0.000144871	0.000178419	0.000184935	0.000153729	0.000122261	0.000143051	7.2742e-05	0.000129073	0.000114035	0.74369	0.987439	0.407704	0.697935	0.741795	0.715713	0.206448	0.0430022	-0.145261	1.36651														Accession	Description	Annotated Seq	Modifications	Positions			WT1	WT2	WT3	WT4	WT5
P16125	L-lactate dehydrogenase B chain OS=Mus musculus OX=10090 GN=Ldhb PE=1 SV=2	[K].YSPDCTIIVVSNPVDILTYVTWK.[L]	P16125 1xOxidation [P140]	P16125 [128-150]	6.32657e-05	7.32817e-05	7.35026e-05	0.00010066	8.87282e-05	5.89256e-05	7.15851e-05	2.86604e-05	4.6004e-05	7.5652e-05	0.931398	0.976848	0.389923	0.457026	0.852627	0.721565	0.276742	0.0951744	-0.141725	1.02148														Q61425	Hydroxyacyl-coenzyme A dehydrogenase, mitochondrial OS=Mus musculus OX=10090 GN=Hadh PE=1 SV=2	[K].LGAGYPMGPFELLDYVGLDTTK.[F]	Q61425 2xOxidation [P255; ]	Q61425 [250-271]			21	17.2	25.6	26.5	19.5
Q9CPU0	Lactoylglutathione lyase OS=Mus musculus OX=10090 GN=Glo1 PE=1 SV=3	[K].GLAFIQDPDGYWIEILNPNK.[I]	Q9CPU0 1xOxidation [P]	Q9CPU0 [160-179]	0.00088897	0.000948465	0.00117752	0.000632368	0.00109044	0.000618997	0.00078391	0.000675264	0.000741374	0.000610336	0.696308	0.826504	0.573463	1.17238	0.559715	0.765674	0.251637	0.0804267	-0.115956	1.0946														P16125	L-lactate dehydrogenase B chain OS=Mus musculus OX=10090 GN=Ldhb PE=1 SV=2	[K].YSPDCTIIVVSNPVDILTYVTWK.[L]	P16125 1xOxidation [P140]	P16125 [128-150]			8.8	10.8	10.1	13.8	12.1
Q9CPU0	Lactoylglutathione lyase OS=Mus musculus OX=10090 GN=Glo1 PE=1 SV=3	[R].GFGHIGIAVPDVYSACK.[R]	Q9CPU0 1xOxidation [P133]	Q9CPU0 [124-140]	0.00698198	0.0078021	0.00845474	0.00673609	0.00739635	0.00586203	0.00553141	0.00558854	0.00539067	0.00621007	0.839593	0.708964	0.660994	0.800266	0.839612	0.769886	0.0809516	0.0070846	-0.113574	2.14968														Q9D0M3	Cytochrome c1, heme protein, mitochondrial OS=Mus musculus OX=10090 GN=Cyc1 PE=1 SV=1	[R].EGLYFNPYFPGQAIGMAPPIYTEVLEYDDGTPATMSQVAK.[D]	Q9D0M3 1xOxidation [P]	Q9D0M3 [229-268]			77.9	73.2	138.1	140.4	116.8
Q9D0M3	Cytochrome c1, heme protein, mitochondrial OS=Mus musculus OX=10090 GN=Cyc1 PE=1 SV=1	[R].EGLYFNPYFPGQAIGMAPPIYTEVLEYDDGTPATMSQVAK.[D]	Q9D0M3 1xOxidation [P]	Q9D0M3 [229-268]	0.000847957	0.00078678	0.00160287	0.00152903	0.00133069	0.00096906	0.000870182	0.000677672	0.000870333	0.00102006	1.14282	1.106	0.422787	0.569207	0.766565	0.801476	0.319306	0.173779	-0.0961094	0.760002														Q9D1L0	Coiled-coil-helix-coiled-coil-helix domain-containing protein 2 OS=Mus musculus OX=10090 GN=Chchd2 PE=2 SV=1	[R].APAAQPPAAAAPSAVGSPAAAPR.[Q]	Q9D1L0 2xOxidation [P30; P34]	Q9D1L0 [29-51]			30.7	33.2	45.3	33.1	40.4
Q9D1L0	Coiled-coil-helix-coiled-coil-helix domain-containing protein 2 OS=Mus musculus OX=10090 GN=Chchd2 PE=2 SV=1	[R].APAAQPPAAAAPSAVGSPAAAPR.[Q]	Q9D1L0 2xOxidation [P30; P34]	Q9D1L0 [29-51]	0.00495425	0.00548407	0.00764751	0.00549341	0.0066236	0.00498997	0.00604349	0.00483084	0.00392535	0.00432127	1.00721	1.10201	0.631689	0.714556	0.652405	0.821574	0.217504	0.136459	-0.0853534	0.864997														P08121	Collagen alpha-1(III) chain OS=Mus musculus OX=10090 GN=Col3a1 PE=1 SV=4	[R].DGTPGGPGIR.[G]	P08121 2xOxidation [P529; P532]	P08121 [526-535]			65.5	61.3	84.2	69.5	98.6
P08121	Collagen alpha-1(III) chain OS=Mus musculus OX=10090 GN=Col3a1 PE=1 SV=4	[R].DGTPGGPGIR.[G]	P08121 2xOxidation [P529; P532]	P08121 [526-535]	0.033638	0.0324751	0.0578456	0.0457478	0.058673	0.0350855	0.0312623	0.041867	0.0398308	0.0358799	1.04303	0.962654	0.723773	0.870661	0.611524	0.842328	0.175277	0.123758	-0.0745188	0.907425
Q8R3B1	1-phosphatidylinositol 4,5-bisphosphate phosphodiesterase delta-1 OS=Mus musculus OX=10090 GN=Plcd1 PE=1 SV=2	[R].NTLDLIAPSPADVQHWVQGLR.[K]	Q8R3B1 1xOxidation [P113]	Q8R3B1 [106-126]	0.0143215	0.0134663	0.0159139	0.0165153	0.017339	0.0130975	0.0145818	0.012527	0.0126056	0.0124288	0.914537	1.08283	0.787171	0.763263	0.716811	0.852923	0.147939	0.084491	-0.0690901	1.07319														More P-OH
P46460	Vesicle-fusing ATPase OS=Mus musculus OX=10090 GN=Nsf PE=1 SV=2	[K].IDGVEQLNNILVIGMTNRPDLIDEALLRPGR.[L]	P46460 1xOxidation [P386]	P46460 [358-388]	0.00459398	0.00477802	0.0062824	0.00649194	0.00594465	0.00446114	0.00494052	0.00567246	0.00398589	0.00450771	0.971085	1.03401	0.902913	0.613974	0.75828	0.856052	0.169749	0.134472	-0.0674997	0.871368														Accession	Description	Annotated Seq	Modifications	Positions
P26645	Myristoylated alanine-rich C-kinase substrate OS=Mus musculus OX=10090 GN=Marcks PE=1 SV=2	[R].EAEAAEPEQPEQPEQPAAEEPQAEEQSEAAGEK.[A]	P26645 1xOxidation [P]	P26645 [220-252]	0.00387519	0.0044908	0.00376583	0.00401742	0.00414836	0.00335762	0.00350052	0.00315131	0.00388511	0.00387499	0.866441	0.779486	0.836817	0.967066	0.934103	0.876782	0.0751788	0.0270762	-0.0571082	1.56741														P48997	Involucrin OS=Mus musculus OX=10090 GN=Ivl PE=1 SV=1	[K].ELSDQPLDQALVK.[K]	P48997 1xOxidation [P440]	P48997 [435-447]			37	34	27.4	34.3	45.3
P05064	Fructose-bisphosphate aldolase A OS=Mus musculus OX=10090 GN=Aldoa PE=1 SV=2	[K].GVVPLAGTNGETTTQGLDGLSER.[C]	P05064 1xOxidation [P115]	P05064 [112-134]	0.000823399	0.00073411	0.000709536	0.0007583	0.000770246	0.000613529	0.000841895	0.000640691	0.0005776	0.000642643	0.745117	1.14682	0.902971	0.761704	0.834334	0.87819	0.162772	0.163916	-0.0564114	0.785379														P97379	Ras GTPase-activating protein-binding protein 2 OS=Mus musculus OX=10090 GN=G3bp2 PE=1 SV=2	[K].SATPPPAEPASLPQEPPK.[A]	P97379 2xOxidation [P233; P]	P97379 [225-242]			4.6	5.2	4.9	4.6	12.9
Q8BGT6	MICAL-like protein 1 OS=Mus musculus OX=10090 GN=Micall1 PE=1 SV=3	[K].DPAPPSPTSTSPAVQPGEEAQGDDLSPDSLSEQGK.[Q]	Q8BGT6 5xOxidation [P126; P127; P129; P134; P138]	Q8BGT6 [123-157]	0.0730673	0.0690458	0.0630365	0.0676435	0.0722802	0.0562804	0.0653165	0.0611664	0.0660199	0.0528385	0.770254	0.945988	0.970333	0.975998	0.731024	0.878719	0.118279	0.089055	-0.0561499	1.05034														A6X8Z5	Rho GTPase-activating protein 31 OS=Mus musculus OX=10090 GN=Arhgap31 PE=1 SV=1	[K].TSPIPESSPAPFPFPEAPGSLPSSSAPR.[E]	A6X8Z5 5xOxidation [P668; P670; P674; P676; P678]	A6X8Z5 [666-693]			10.4	8.3	5.7	12.2	14.1
P18760	Cofilin-1 OS=Mus musculus OX=10090 GN=Cfl1 PE=1 SV=3	[K].EILVGDVGQTVDDPYTTFVK.[M]	P18760 1xOxidation [P67]	P18760 [54-73]	0.0028515	0.0027116	0.00224929	0.00218736	0.00297742	0.00190181	0.00213309	0.00250313	0.00258123	0.00198613	0.66695	0.786654	1.11285	1.18007	0.667063	0.882718	0.246815	0.272975	-0.0541782	0.563877														Q9EQK5	Major vault protein OS=Mus musculus OX=10090 GN=Mvp PE=1 SV=4	[R].LAQDPFPLYPGELLEK.[D]	Q9EQK5 2xOxidation [P98; P101]	Q9EQK5 [92-107]			422.2	510.6	326.7	114.6	759.7
P97807	Fumarate hydratase, mitochondrial OS=Mus musculus OX=10090 GN=Fh PE=1 SV=3	[R].SGLGELILPENEPGSSIMPGK.[V]	P97807 1xOxidation [P]	P97807 [348-368]	0.00112716	0.00102182	0.00143738	0.00129439	0.0012565	0.00115819	0.00104053	0.000988433	0.00103106	0.00111537	1.02753	1.01831	0.687662	0.796561	0.887678	0.883549	0.145643	0.149562	-0.0537696	0.825179														P08249	Malate dehydrogenase, mitochondrial OS=Mus musculus OX=10090 GN=Mdh2 PE=1 SV=3	[K].GCDVVVIPAGVPR.[K]	P08249 1xOxidation [P99]	P08249 [92-104]			5.9	8.3	5	4.6	2.2
Q8BH59	Calcium-binding mitochondrial carrier protein Aralar1 OS=Mus musculus OX=10090 GN=Slc25a12 PE=1 SV=1	[R].VGGINLLTAGALAGVPAASLVTPADVIK.[T]	Q8BH59 1xOxidation [P531]	Q8BH59 [516-543]	0.001171	0.00114636	0.00132498	0.00122349	0.00145216	0.00110346	0.0012208	0.000919158	0.0011962	0.00107567	0.942325	1.06493	0.693714	0.977697	0.740737	0.883881	0.159414	0.173469	-0.053606	0.760777
P04247	Myoglobin OS=Mus musculus OX=10090 GN=Mb PE=1 SV=3	[K].KGQHAAEIQPLAQSHATK.[H]	P04247 1xOxidation [P89]	P04247 [80-97]	0.000114428	0.00010022	0.000132163	0.000115493	0.000134274	8.65162e-05	0.000114605	0.00012178	0.000104248	9.35589e-05	0.756073	1.14353	0.92144	0.902636	0.696778	0.884092	0.173583	0.177794	-0.0535025	0.750082
Q9D819	Inorganic pyrophosphatase OS=Mus musculus OX=10090 GN=Ppa1 PE=1 SV=1	[K].AIVDALPPPCESACSLPTDVDK.[W]	Q9D819 1xOxidation [P269]	Q9D819 [261-282]	0.00678908	0.00625264	0.00691794	0.00629823	0.00710371	0.00588863	0.00621822	0.00577902	0.00617337	0.00532708	0.867367	0.994496	0.835367	0.980175	0.749901	0.885461	0.102558	0.0710808	-0.0528304	1.14825
P08122	Collagen alpha-2(IV) chain OS=Mus musculus OX=10090 GN=Col4a2 PE=1 SV=4	[R].GDPGFQGAHGEPGSR.[G]	P08122 2xOxidation [P363; P372]	P08122 [361-375]	0.0901377	0.0748193	0.106342	0.0969838	0.106316	0.09769	0.080195	0.0680369	0.08788	0.0781854	1.08379	1.07185	0.639794	0.906131	0.735407	0.887393	0.198337	0.239296	-0.0518839	0.621065
E9Q616	AHNAK nucleoprotein (desmoyokin) OS=Mus musculus OX=10090 GN=Ahnak PE=1 SV=1	[K].VDIDVPDVDVHGPDWHLK.[M]	E9Q616 2xOxidation [P2611; P2618]; 2xOxidation [P5470; P5477]; 2xOxidation [P8781; P8788]; 2xOxidation [P12220; P12227]; 2xOxidation [P15787; P15794]; 2xOxidation [P19608; P19615]; 2xOxidation [P24147; P24154]	E9Q616 [2606-2623]; [2860-2877]; [3312-3329]; [3440-3457]; [3568-3585]; [3822-3839]; [4540-4557]	0.0015196	0.0015404	0.00148681	0.00148875	0.00150836	0.0013046	0.0013743	0.00133881	0.00132988	0.00135822	0.85851	0.89217	0.900457	0.893283	0.900461	0.888976	0.0174689	0.000166686	-0.0511099	3.7781														Collated Table
Q04857	Collagen alpha-1(VI) chain OS=Mus musculus OX=10090 GN=Col6a1 PE=1 SV=1	[R].GDPGEAGPQGDQGR.[E]	Q04857 1xOxidation [P444]	Q04857 [442-455]	0.0288124	0.0242187	0.0202218	0.0251365	0.0208665	0.0230673	0.0215158	0.0191633	0.0242334	0.0181209	0.800601	0.888399	0.947658	0.964074	0.868422	0.893831	0.0655715	0.039146	-0.0487446	1.40731
Q7TQ48	Sarcalumenin OS=Mus musculus OX=10090 GN=Srl PE=1 SV=1	[R].ALYADAAPGDK.[N]	Q7TQ48 1xOxidation [P61]	Q7TQ48 [54-64]	0.00472892	0.00454913	0.00461785	0.00463149	0.00387298	0.00415655	0.0040598	0.00383486	0.00389617	0.00406278	0.878964	0.892434	0.830443	0.841235	1.04901	0.898416	0.0880086	0.0525612	-0.0465223	1.27933														Protein (Accession #)	KO/WT Raw P-OH +/- SE		KO/WT Abundance +/- SE		KO/WT Net P-OH +/- SE		P
P08121	Collagen alpha-1(III) chain OS=Mus musculus OX=10090 GN=Col3a1 PE=1 SV=4	[R].GGPGSPGPK.[G]	P08121 2xOxidation [P733; P736]	P08121 [731-739]	0.0375411	0.0378258	0.0413575	0.0423907	0.0509967	0.0363754	0.0338441	0.0388355	0.0331235	0.0464893	0.968948	0.894735	0.939018	0.781386	0.911614	0.89914	0.0715969	0.0355406	-0.0461726	1.44928														LESS P-OH
P07310	Creatine kinase M-type OS=Mus musculus OX=10090 GN=Ckm PE=1 SV=1	[K].LNYKPQEEYPDLSK.[H]	P07310 1xOxidation [P21]	P07310 [12-25]	0.0008868	0.000800414	0.0010797	0.000901525	0.000907275	0.000834129	0.000794632	0.000742154	0.000769627	0.000929163	0.940606	0.992777	0.68737	0.853694	1.02413	0.899714	0.13511	0.192166	-0.0458953	0.716323														Hydroxyacyl-CoA dehydrogenase (Q61425)	0.683871	0.129973	0.928831	0.0641725	0.715713	0.0923265	0.0430022
P09411	Phosphoglycerate kinase 1 OS=Mus musculus OX=10090 GN=Pgk1 PE=1 SV=4	[K].TGQATVASGIPAGWMGLDCGTESSK.[K]	P09411 2xOxidation [P308; ]	P09411 [298-322]	0.000529729	0.000500387	0.000572387	0.000514733	0.000574179	0.000509579	0.000473194	0.000471226	0.000462286	0.000501108	0.961961	0.945657	0.823265	0.898108	0.872739	0.900346	0.0560316	0.0213257	-0.0455905	1.6711														L-lactate dehydrogenase B chain (P16125)	0.721164	0.12476	0.998419	0.0113012	0.721565	0.123763	0.0951744
Q01149	Collagen alpha-2(I) chain OS=Mus musculus OX=10090 GN=Col1a2 PE=1 SV=2	[K].GPSGEPGTAGAPGTAGPQGLLGAPGILGLPGSR.[G]	Q01149 4xOxidation [P854; P864; P876; P882]	Q01149 [853-885]	0.383349	0.412872	0.442055	0.403776	0.394097	0.364464	0.404882	0.328066	0.370627	0.359878	0.950738	0.980648	0.742138	0.917902	0.913171	0.90092	0.0928554	0.0901868	-0.045314	1.04486														Cytochrome C1 heme protein (Q9D0M3)	0.794415	0.135453	0.997463	0.0194912	0.801476	0.142798	0.173779
Q5HZI9	Solute carrier family 25 member 51 OS=Mus musculus OX=10090 GN=Slc25a51 PE=1 SV=1	[R].IQSQIGGPFLSLPMVFK.[T]	Q5HZI9 1xOxidation [P]	Q5HZI9 [240-256]	0.0698145	0.0580607	0.0527491	0.0737583	0.0541894	0.0658653	0.0604572	0.0415948	0.0563012	0.0530162	0.943432	1.04127	0.78854	0.76332	0.978351	0.902984	0.121495	0.154366	-0.0443201	0.811448														CCH domain-containing protein 2 (Q9D1L0)	0.867373	0.0667496	1.07691	0.0518955	0.821574	0.0972707	0.136459
P97807	Fumarate hydratase, mitochondrial OS=Mus musculus OX=10090 GN=Fh PE=1 SV=3	[R].SGLGELILPENEPGSSIMPGK.[V]	P97807 1xOxidation [P]	P97807 [348-368]	0.0468996	0.0433888	0.0576978	0.0551346	0.0543328	0.0487777	0.0449601	0.04257	0.0467717	0.0466095	1.04005	1.03621	0.737809	0.848318	0.857852	0.904048	0.131186	0.161946	-0.0438086	0.79063														Collagen alpha-1(III) chain (P08121)	0.896767	0.0704256	1.0893	0.0982776	0.842328	0.0783862	0.123758
Q9D0F3	Protein ERGIC-53 OS=Mus musculus OX=10090 GN=Lman1 PE=1 SV=1	[R].GAGTPGQPGQVSQQELDTVVK.[S]	Q9D0F3 2xOxidation [P386; P389]	Q9D0F3 [382-402]	0.0386396	0.0368408	0.0420857	0.0385072	0.0352113	0.0371686	0.0332068	0.0309442	0.0348056	0.0359614	0.96193	0.90136	0.735266	0.903872	1.0213	0.904747	0.106761	0.127399	-0.043473	0.894833
Q61554	Fibrillin-1 OS=Mus musculus OX=10090 GN=Fbn1 PE=1 SV=2	[R].SCTDIDECEDNPNICDGGQCTNIPGEYR.[C]	Q61554 1xOxidation [P1260]	Q61554 [1237-1264]	0.000661017	0.000956381	0.00070549	0.000861817	0.000798246	0.000612541	0.000796094	0.000884332	0.000668302	0.000589147	0.926665	0.832403	1.2535	0.775458	0.738052	0.905216	0.207271	0.296036	-0.043248	0.528656														MORE P-OH
Q810B6	Rabankyrin-5 OS=Mus musculus OX=10090 GN=Ankfy1 PE=1 SV=2	[R].SGCDVNSPR.[Q]	Q810B6 1xOxidation [P754]	Q810B6 [747-755]	0.0358582	0.0286866	0.0455338	0.0394756	0.0417576	0.0326035	0.0299366	0.0338181	0.0354962	0.0389713	0.909236	1.04357	0.742703	0.899194	0.933273	0.905596	0.107695	0.124172	-0.0430655	0.905975														Involucrin (P48997)	1.19533	0.246645	0.850111	0.0872272	1.58759	0.50111	0.414658
Q14BI5	Myomesin 2 OS=Mus musculus OX=10090 GN=Myom2 PE=1 SV=1	[R].NYVVLSWDPPSPR.[G]	Q14BI5 2xOxidation [P533; P534]	Q14BI5 [525-537]	0.00089803	0.000928567	0.000823491	0.000713156	0.000835289	0.00071213	0.000738333	0.000802603	0.000708008	0.000814662	0.792991	0.795132	0.974636	0.99278	0.975306	0.906169	0.1026	0.11661	-0.0427908	0.933264														Ras GAP binding protein 2 (P97379)	1.73443	0.322203	1.07739	0.027418	1.61604	0.305466	0.333698
E9QLJ0	Cardiomyopathy-associated protein 5 OS=Mus musculus OX=10090 GN=Cmya5 PE=1 SV=1	[K].SELGSGLPLPSMSTSEVLRPEPK.[L]	E9QLJ0 1xOxidation [P1523]	E9QLJ0 [1504-1526]	0.00428597	0.00475672	0.00464012	0.00449407	0.00381295	0.00420323	0.0047472	0.00427959	0.00307958	0.00375132	0.980695	0.997999	0.922303	0.685254	0.983838	0.914018	0.131125	0.218203	-0.0390454	0.66114														Rho GTPase-activating protein 31 (A6X8Z5)	1.63156	0.37162	0.962268	0.0566423	1.68981	0.266931	0.0251122
P07310	Creatine kinase M-type OS=Mus musculus OX=10090 GN=Ckm PE=1 SV=1	[K].GGDDLDPNYVLSSR.[V]	P07310 1xOxidation [P123]	P07310 [117-130]	0.00150488	0.00138293	0.00166265	0.00163495	0.00161673	0.00136996	0.00146509	0.00141852	0.00146172	0.00143386	0.910345	1.05941	0.853171	0.894049	0.886888	0.920772	0.080251	0.0800721	-0.0358477	1.09652														Major vault protein (Q9EQK5)	1.75661	0.74519	1.08438	0.0587362	1.72591	0.816396	0.786126
P09411	Phosphoglycerate kinase 1 OS=Mus musculus OX=10090 GN=Pgk1 PE=1 SV=4	[K].QIVWNGPVGVFEWEAFAR.[G]	P09411 1xOxidation [P339]	P09411 [333-350]	9.68064e-05	7.18148e-05	8.77245e-05	7.03908e-05	5.98355e-05	7.46699e-05	8.18724e-05	6.64105e-05	5.86314e-05	6.69684e-05	0.771332	1.14005	0.757035	0.832941	1.11921	0.924113	0.189908	0.330809	-0.0342749	0.480423														Malate dehydrogenase, mito (P08249)	1.8325	0.474949	1.01565	0.021631	1.80106	0.469617	0.156994
P08121	Collagen alpha-1(III) chain OS=Mus musculus OX=10090 GN=Col3a1 PE=1 SV=4	[K].DGPPGPAGNSGSPGNPGIAGPK.[G]	P08121 3xOxidation [P906; P913; P916]	P08121 [901-922]	0.0295296	0.0251113	0.0377851	0.0391654	0.0313597	0.0328281	0.0241904	0.026866	0.0346713	0.0298022	1.1117	0.963328	0.71102	0.885256	0.950334	0.924328	0.145201	0.283097	-0.0341738	0.548065
P70414	Sodium/calcium exchanger 1 OS=Mus musculus OX=10090 GN=Slc8a1 PE=1 SV=1	[R].GGGEDFEDTCGEPEFQNDEIVK.[T]	P70414 1xOxidation [P592]	P70414 [580-601]	0.0496263	0.0482995	0.0574318	0.0533277	0.0552411	0.0497978	0.0474934	0.0481919	0.0490467	0.0487649	1.00346	0.98331	0.839116	0.919722	0.882764	0.925673	0.0684487	0.0777401	-0.0335422	1.10936
M0QWP1	Agrin OS=Mus musculus OX=10090 GN=Agrn PE=1 SV=1	[R].TPGPQRPPK.[S]	M0QWP1 1xOxidation [P1315]	M0QWP1 [1312-1320]	0.268237	0.282512	0.267891	0.280404	0.240155	0.25364	0.26261	0.239156	0.24427	0.238345	0.945582	0.929555	0.892739	0.871137	0.99246	0.926295	0.0472465	0.0265518	-0.0332509	1.57591
P05202	Aspartate aminotransferase, mitochondrial OS=Mus musculus OX=10090 GN=Got2 PE=1 SV=1	[K].EYLPIGGLAEFCK.[A]	P05202 1xOxidation [P98]	P05202 [95-107]	0.000459318	0.000424752	0.000548817	0.000457501	0.000487985	0.00040821	0.000477354	0.000437439	0.000455502	0.000405012	0.88873	1.12384	0.797057	0.99563	0.829968	0.927045	0.133437	0.253201	-0.0328991	0.596535
Q9CQH3	NADH dehydrogenase [ubiquinone] 1 beta subcomplex subunit 5, mitochondrial OS=Mus musculus OX=10090 GN=Ndufb5 PE=1 SV=1	[R].GDGPWYQFPTPEK.[E]	Q9CQH3 1xOxidation [P167]	Q9CQH3 [164-176]	0.0181762	0.0189436	0.016167	0.0215424	0.0158493	0.0153229	0.0190141	0.0165368	0.0165125	0.015925	0.843019	1.00372	1.02288	0.766514	1.00478	0.928183	0.116115	0.239141	-0.0323665	0.621346
Q60994	Adiponectin OS=Mus musculus OX=10090 GN=Adipoq PE=1 SV=2	[R].DGTPGEK.[G]	Q60994 1xOxidation [P65]	Q60994 [62-68]	0.0132595	0.0126133	0.0242888	0.0205229	0.019496	0.0179945	0.0131754	0.0159143	0.0158433	0.0158343	1.35711	1.04456	0.655211	0.771981	0.81218	0.928209	0.278338	0.369302	-0.0323544	0.432619
O35074	Prostacyclin synthase OS=Mus musculus OX=10090 GN=Ptgis PE=1 SV=1	[R].IFDLQLPNFNPSEEK.[A]	O35074 1xOxidation [P]	O35074 [108-122]	0.414699	0.434393	0.480035	0.474414	0.481207	0.460077	0.436793	0.394233	0.429645	0.401193	1.10942	1.00552	0.821259	0.905632	0.833723	0.935112	0.121915	0.263204	-0.0291363	0.579708
P14211	Calreticulin OS=Mus musculus OX=10090 GN=Calr PE=1 SV=1	[K].IDNSQVESGSLEDDWDFLPPK.[K]	P14211 2xOxidation [P204; P205]	P14211 [186-206]	0.00431023	0.00399534	0.00484353	0.00508176	0.00496028	0.0040315	0.00439711	0.00489081	0.00403868	0.00415145	0.935334	1.10056	1.00976	0.794741	0.836939	0.935467	0.124787	0.275177	-0.0289716	0.560388
P49817	Caveolin-1 OS=Mus musculus OX=10090 GN=Cav1 PE=1 SV=1	[K].IDFEDVIAEPEGTHSFDGIWK.[A]	P49817 1xOxidation [P75]	P49817 [66-86]	0.00343496	0.00338141	0.00311404	0.00346695	0.00355776	0.00288302	0.00315744	0.00323958	0.00317973	0.00336872	0.839318	0.933763	1.04031	0.917154	0.946867	0.935483	0.0719468	0.106139	-0.0289642	0.974124
Q921G7	Electron transfer flavoprotein-ubiquinone oxidoreductase, mitochondrial OS=Mus musculus OX=10090 GN=Etfdh PE=1 SV=1	[K].DPSQNINWVVPEGGGGPAYNGM.[-]	Q921G7 2xOxidation [P611; ]	Q921G7 [595-616]	0.000371073	0.000314271	0.00036644	0.000333095	0.000361629	0.000301052	0.000363949	0.000322668	0.000324298	0.000310079	0.811301	1.15807	0.880548	0.973591	0.857452	0.936193	0.137408	0.303932	-0.0286346	0.517223
O08749	Dihydrolipoyl dehydrogenase, mitochondrial OS=Mus musculus OX=10090 GN=Dld PE=1 SV=2	[K].NETLGGTCLNVGCIPSK.[A]	O08749 1xOxidation [P87]	O08749 [73-89]	0.0009758	0.000913873	0.000972718	0.000969109	0.00104808	0.000958652	0.000959422	0.000857366	0.000924938	0.000853021	0.982426	1.04984	0.881413	0.954421	0.813889	0.936398	0.0913026	0.190803	-0.0285395	0.719414
P07724	Serum albumin OS=Mus musculus OX=10090 GN=Alb PE=1 SV=3	[K].AADKDTCFSTEGPNLVTR.[C]	P07724 1xOxidation [P597]	P07724 [585-602]	0.00625009	0.00638671	0.00617175	0.00544749	0.00769431	0.00586614	0.0059436	0.00554963	0.00620334	0.00602122	0.938568	0.930619	0.899199	1.13875	0.782556	0.937939	0.128476	0.287494	-0.0278256	0.541372
Q5EBG6	Heat shock protein beta-6 OS=Mus musculus OX=10090 GN=Hspb6 PE=1 SV=1	[R].LPPGVDPAAVTSALSPEGVLSIQATPASAQAQLPSPPAAK.[-]	Q5EBG6 5xOxidation [P138; P148; P156; P158; P159]	Q5EBG6 [123-162]	0.00290753	0.00308061	0.00164914	0.00166513	0.0026114	0.00196121	0.00243495	0.00211227	0.0018994	0.00210507	0.674529	0.790412	1.28084	1.1407	0.806109	0.938516	0.258464	0.356195	-0.0275582	0.448312
P08121	Collagen alpha-1(III) chain OS=Mus musculus OX=10090 GN=Col3a1 PE=1 SV=4	[R].GAPGPQGPR.[G]	P08121 1xOxidation [P1084]	P08121 [1082-1090]	0.0167933	0.0183831	0.0195109	0.0165219	0.0179113	0.0159303	0.0172869	0.0168827	0.0152719	0.0181799	0.948611	0.940365	0.865298	0.924346	1.01499	0.938723	0.0536551	0.073877	-0.0274627	1.13149
P14824	Annexin A6 OS=Mus musculus OX=10090 GN=Anxa6 PE=1 SV=3	[R].DQAQEDAQVAAEILEIADTPSGDK.[T]	P14824 1xOxidation [P536]	P14824 [517-540]	0.000483348	0.000480724	0.000553941	0.000515204	0.000437785	0.000502138	0.000529086	0.000405345	0.000433591	0.000433228	1.03888	1.1006	0.731747	0.841591	0.989591	0.940481	0.150898	0.40377	-0.0266498	0.393866
P11087	Collagen alpha-1(I) chain OS=Mus musculus OX=10090 GN=Col1a1 PE=1 SV=4	[K].GSPGEAGRPGEAGLPGAK.[G]	P11087 3xOxidation [P512; P518; P524]	P11087 [510-527]	0.0709341	0.0727037	0.0696203	0.0629291	0.0751638	0.0607662	0.0695555	0.0715967	0.0643714	0.0632028	0.856657	0.956698	1.02839	1.02292	0.840868	0.941106	0.0890706	0.204632	-0.0263613	0.689027
P08121	Collagen alpha-1(III) chain OS=Mus musculus OX=10090 GN=Col3a1 PE=1 SV=4	[R].GSPGGPGTAGFPGGR.[G]	P08121 3xOxidation [P865; P868; P874]	P08121 [863-877]	0.0483772	0.0659568	0.0582578	0.0705635	0.0455222	0.0471461	0.0504574	0.0727054	0.0426685	0.0507011	0.974553	0.765008	1.248	0.604682	1.11377	0.941201	0.259472	0.542414	-0.0263177	0.265669
P10126	Elongation factor 1-alpha 1 OS=Mus musculus OX=10090 GN=Eef1a1 PE=1 SV=3	[K].SGDAAIVDMVPGKPMCVESFSDYPPLGR.[F]	P10126 1xOxidation [P]	P10126 [396-423]	0.00151363	0.00153864	0.00137867	0.00178644	0.00150976	0.00165274	0.00155958	0.00129485	0.00149135	0.00126721	1.09191	1.01361	0.939201	0.834814	0.839345	0.943777	0.111378	0.316456	-0.0251307	0.499686
Q9D6J6	NADH dehydrogenase [ubiquinone] flavoprotein 2, mitochondrial OS=Mus musculus OX=10090 GN=Ndufv2 PE=1 SV=2	[K].NYPEGHQAAAVLPVLDLAQR.[Q]	Q9D6J6 1xOxidation [P70]	Q9D6J6 [68-87]	0.00187945	0.00184122	0.00175541	0.00164528	0.00167874	0.00163258	0.00185543	0.00159663	0.00160804	0.00160503	0.868649	1.00772	0.90955	0.977368	0.956094	0.943876	0.0551913	0.0953268	-0.025085	1.02079
Q61554	Fibrillin-1 OS=Mus musculus OX=10090 GN=Fbn1 PE=1 SV=2	[R].GGPEPPASSEMDDNSLSPEACYECK.[I]	Q61554 5xOxidation [P2699; P2701; P2702; P2714; ]	Q61554 [2697-2721]	0.00218606	0.00213716	0.00262955	0.00196303	0.00293378	0.00203383	0.00144231	0.00191221	0.00284209	0.00277894	0.930363	0.67487	0.727199	1.44781	0.947222	0.945493	0.305551	0.592731	-0.0243417	0.227142
Q99N84	28S ribosomal protein S18b, mitochondrial OS=Mus musculus OX=10090 GN=Mrps18b PE=1 SV=1	[R].LYQGNLLEESGPPPESMPEMPTTPPAESSIEQPGSQSA.[-]	Q99N84 1xOxidation [P228]	Q99N84 [217-254]	0.0172378	0.0121212	0.017122	0.0133858	0.0168209	0.0134036	0.0118731	0.0145614	0.0129151	0.0199823	0.777571	0.979529	0.850451	0.964836	1.18795	0.952067	0.15599	0.543485	-0.0213323	0.264813
Q9D0M3	Cytochrome c1, heme protein, mitochondrial OS=Mus musculus OX=10090 GN=Cyc1 PE=1 SV=1	[R].HGGEDYVFSLLTGYCEPPTGVSLR.[E]	Q9D0M3 1xOxidation [P]	Q9D0M3 [205-228]	0.00201485	0.00183045	0.00206133	0.00179802	0.00185476	0.00188752	0.00184673	0.00161901	0.00186161	0.00184588	0.936806	1.0089	0.785419	1.03536	0.995208	0.952339	0.100042	0.335798	-0.0212085	0.473922
Q60597	2-oxoglutarate dehydrogenase, mitochondrial OS=Mus musculus OX=10090 GN=Ogdh PE=1 SV=3	[R].NGHNEMDEPMFTQPLMYK.[Q]	Q60597 1xOxidation [P]	Q60597 [511-528]	0.0244462	0.023717	0.0273611	0.0271729	0.0268382	0.0257958	0.0248235	0.0231035	0.0247695	0.0245218	1.05521	1.04666	0.844392	0.911551	0.913689	0.954299	0.092558	0.297959	-0.0203158	0.525843
P08122	Collagen alpha-2(IV) chain OS=Mus musculus OX=10090 GN=Col4a2 PE=1 SV=4	[R].GQPGAVGPQGYNGPPGLQGFPGLQGR.[K]	P08122 3xOxidation [P75; P]	P08122 [61-86]	0.146626	0.142537	0.131815	0.135432	0.127726	0.140128	0.13293	0.110233	0.134368	0.135153	0.955682	0.9326	0.836271	0.992144	1.05815	0.95497	0.0815766	0.261669	-0.0200103	0.582248
P56399	Ubiquitin carboxyl-terminal hydrolase 5 OS=Mus musculus OX=10090 GN=Usp5 PE=1 SV=1	[R].GTGLQPGEEELPDIAPPLVTPDEPK.[GA]	P56399 1xOxidation [P]	P56399 [604-628]	0.00466588	0.00470496	0.00492277	0.00452289	0.00457718	0.00465715	0.00486551	0.00465887	0.00393833	0.00425062	0.998128	1.03412	0.946392	0.870756	0.928655	0.955611	0.0632136	0.188705	-0.0197189	0.724215
P07310	Creatine kinase M-type OS=Mus musculus OX=10090 GN=Ckm PE=1 SV=1	[K].LNYKPQEEYPDLSK.[H]	P07310 1xOxidation [P16]	P07310 [12-25]	0.000482867	0.000492719	0.00053686	0.00046093	0.00055091	0.000476368	0.000486092	0.000478681	0.000483565	0.000478982	0.986542	0.986551	0.891631	1.04911	0.869437	0.956654	0.0744469	0.244104	-0.0192453	0.612426
P16858	Glyceraldehyde-3-phosphate dehydrogenase OS=Mus musculus OX=10090 GN=Gapdh PE=1 SV=2	[K].LVINGKPITIFQER.[D]	P16858 1xOxidation [P71]	P16858 [65-78]	0.000673919	0.000601941	0.000600356	0.000664467	0.000710446	0.000591017	0.000697731	0.000591777	0.000624493	0.000584537	0.876986	1.15914	0.985711	0.939842	0.822774	0.95689	0.128838	0.439134	-0.0191381	0.357403
P05201	Aspartate aminotransferase, cytoplasmic OS=Mus musculus OX=10090 GN=Got1 PE=1 SV=3	[R].TDESQPWVLPVVR.[K]	P05201 2xOxidation [P48; P52]	P05201 [43-55]	0.00896939	0.00684741	0.00657522	0.00663747	0.00679119	0.00683465	0.00666971	0.00686007	0.00678614	0.00668006	0.761997	0.974048	1.04332	1.0224	0.983636	0.95708	0.112644	0.419048	-0.0190517	0.377736
P16858	Glyceraldehyde-3-phosphate dehydrogenase OS=Mus musculus OX=10090 GN=Gapdh PE=1 SV=2	[R].GAAQNIIPASTGAAK.[A]	P16858 1xOxidation [P206]	P16858 [199-213]	0.000336959	0.00022624	0.000268938	0.000298311	0.000293804	0.000257404	0.000270212	0.000276943	0.000262706	0.000269361	0.763902	1.19436	1.02977	0.880644	0.916805	0.957096	0.16307	0.446992	-0.0190445	0.3497
P05202	Aspartate aminotransferase, mitochondrial OS=Mus musculus OX=10090 GN=Got2 PE=1 SV=1	[R].DDNGKPYVLPSVR.[K]	P05202 1xOxidation [P74]	P05202 [69-81]	0.00245104	0.00220707	0.00307683	0.00262418	0.00267395	0.00237789	0.00250332	0.00246731	0.00234002	0.00265082	0.970155	1.13423	0.801902	0.891716	0.99135	0.95787	0.123568	0.407188	-0.0186934	0.390205
Q9EQ20	Methylmalonate-semialdehyde dehydrogenase [acylating], mitochondrial OS=Mus musculus OX=10090 GN=Aldh6a1 PE=1 SV=1	[K].LLQDSGAPDGTLNIIHGQHDAVNFICDHPDIK.[A]	Q9EQ20 1xOxidation [P]	Q9EQ20 [224-255]	0.00301204	0.00287559	0.00280106	0.00291902	0.00297878	0.0026327	0.00283828	0.00283298	0.00279705	0.00286362	0.874058	0.987027	1.01139	0.958215	0.961341	0.958407	0.0518417	0.148835	-0.01845	0.827295
P07310	Creatine kinase M-type OS=Mus musculus OX=10090 GN=Ckm PE=1 SV=1	[K].AGHPFMWNEHLGYVLTCPSNLGTGLR.[G]	P07310 3xOxidation [P270; P284; ]	P07310 [267-292]	0.000191843	0.000184685	0.000232897	0.000206063	0.000223273	0.000206836	0.000208974	0.00019934	0.000184804	0.000186176	1.07815	1.13152	0.855915	0.896833	0.833846	0.959253	0.13612	0.453089	-0.0180668	0.343816
P14211	Calreticulin OS=Mus musculus OX=10090 GN=Calr PE=1 SV=1	[K].KPEDWDEEMDGEWEPPVIQNPEYK.[G]	P14211 3xOxidation [P263; P]	P14211 [249-272]	0.0049883	0.00525908	0.00518606	0.00527757	0.00523914	0.00499096	0.00515761	0.0047153	0.00504091	0.00498839	1.00053	0.980705	0.909225	0.955157	0.952139	0.959552	0.0344022	0.0570374	-0.0179315	1.24384
Q62422	Osteoclast-stimulating factor 1 OS=Mus musculus OX=10090 GN=Ostf1 PE=1 SV=2	[K].GRTGLIPSNYVAEQAESIDNPLHEAAK.[R]	Q62422 1xOxidation [P62]	Q62422 [56-82]	0.0588018	0.0574021	0.0747156	0.0670342	0.0612292	0.0645948	0.0538196	0.0550762	0.0589504	0.0702599	1.09852	0.93759	0.737144	0.879409	1.14749	0.96003	0.166585	0.554884	-0.0177151	0.255798
P05125	Natriuretic peptides A OS=Mus musculus OX=10090 GN=Nppa PE=1 SV=2	[K].MPVEDEVMPPQALSEQTEEAGAALSSLPEVPPWTGEVNPPLR.[D]	P05125 2xOxidation [P]	P05125 [50-91]	0.00870087	0.00837088	0.00811762	0.00781025	0.0083792	0.00791373	0.00767791	0.00834658	0.0073437	0.00844774	0.909533	0.917216	1.0282	0.940264	1.00818	0.96068	0.0541703	0.180871	-0.0174215	0.742631
Q9JKS4	LIM domain-binding protein 3 OS=Mus musculus OX=10090 GN=Ldb3 PE=1 SV=1	[R].ASPGALEFGDTFSSSFSQTSVCSPLMEASGPVLPLGSPVAK.[A]	Q9JKS4 1xOxidation [P]	Q9JKS4 [128-168]	0.00108414	0.00105582	0.000822813	0.000976485	0.000900318	0.000781401	0.00113529	0.00104867	0.000814805	0.000810248	0.720754	1.07527	1.27449	0.834427	0.899957	0.96098	0.217256	0.618348	-0.0172855	0.208767
Q8K2B3	Succinate dehydrogenase [ubiquinone] flavoprotein subunit, mitochondrial OS=Mus musculus OX=10090 GN=Sdha PE=1 SV=1	[R].ACALSIAESCRPGDK.[V]	Q8K2B3 1xOxidation [P477]	Q8K2B3 [466-480]	0.0109448	0.0113041	0.0105131	0.0111693	0.0108676	0.0102709	0.0112207	0.0103584	0.0102246	0.0106072	0.938422	0.992618	0.985283	0.915424	0.976047	0.961559	0.0331705	0.0629033	-0.0170241	1.20133
P20357	Microtubule-associated protein 2 OS=Mus musculus OX=10090 GN=Map2 PE=1 SV=2	[K].GEVQMEFIQLPK.[E]	P20357 1xOxidation [P1206]	P20357 [1196-1207]	0.625685	0.65235	0.653179	0.675833	0.61992	0.65433	0.584841	0.589744	0.657005	0.618482	1.04578	0.896514	0.902882	0.97214	0.99768	0.962999	0.0635876	0.253107	-0.0163741	0.596696
Q14BI5	Myomesin 2 OS=Mus musculus OX=10090 GN=Myom2 PE=1 SV=1	[K].EIVIYQDDLEGDVQIPGPPTNVQASEVSR.[N]	Q14BI5 1xOxidation [P511]	Q14BI5 [496-524]	0.000253168	0.000273673	0.000235008	0.000187852	0.000280384	0.000231836	0.000250462	0.000238539	0.000203232	0.000248795	0.915739	0.915189	1.01503	1.08188	0.887337	0.963033	0.0822836	0.268099	-0.0163587	0.571705
Q9D051	Pyruvate dehydrogenase E1 component subunit beta, mitochondrial OS=Mus musculus OX=10090 GN=Pdhb PE=1 SV=1	[K].VLEDNSVPQVK.[D]	Q9D051 1xOxidation [P344]	Q9D051 [337-347]	0.00222461	0.00226336	0.0020139	0.00231528	0.00197672	0.00215459	0.00220906	0.00212438	0.00200388	0.00189293	0.968524	0.97601	1.05486	0.865503	0.957615	0.964502	0.0673824	0.291009	-0.0156967	0.536094
Q8K4Z3	NAD(P)H-hydrate epimerase OS=Mus musculus OX=10090 GN=Naxe PE=1 SV=1	[K].SPPTVLVICGPGNNGGDGLVCAR.[H]	Q8K4Z3 1xOxidation [P]	Q8K4Z3 [101-123]	0.0116676	0.0121483	0.0118716	0.0134408	0.0103361	0.0110819	0.0114257	0.012607	0.012114	0.010113	0.949805	0.940519	1.06194	0.901288	0.978419	0.966394	0.0601194	0.280118	-0.0148457	0.552659
Q08091	Calponin-1 OS=Mus musculus OX=10090 GN=Cnn1 PE=1 SV=1	[R].GPAYGLSAEVK.[N]	Q08091 1xOxidation [P10]	Q08091 [9-19]	0.104533	0.105906	0.119405	0.112527	0.0905594	0.120496	0.0978032	0.0762255	0.0949546	0.115936	1.15271	0.923487	0.638378	0.843838	1.28022	0.967726	0.253794	0.67578	-0.0142478	0.170194
Q9CZB0	Succinate dehydrogenase cytochrome b560 subunit, mitochondrial OS=Mus musculus OX=10090 GN=Sdhc PE=1 SV=1	[K].SLCLGPTLIYSAK.[F]	Q9CZB0 1xOxidation [P110]	Q9CZB0 [105-117]	0.0218089	0.0205316	0.0191171	0.0210346	0.0225776	0.0197555	0.0202968	0.0221564	0.018667	0.0203226	0.905844	0.988564	1.15899	0.887445	0.900122	0.968192	0.113862	0.493873	-0.0140383	0.306385
Q9D6J5	NADH dehydrogenase [ubiquinone] 1 beta subcomplex subunit 8, mitochondrial OS=Mus musculus OX=10090 GN=Ndufb8 PE=1 SV=1	[R].VDTSPTPVSWDVMCK.[H]	Q9D6J5 3xOxidation [P121; P123; ]	Q9D6J5 [117-131]	0.00820397	0.00853628	0.00823305	0.00796235	0.00810112	0.00787563	0.00760997	0.00788893	0.00809895	0.00823442	0.959978	0.891485	0.958203	1.01716	1.01645	0.968655	0.0519058	0.246399	-0.0138307	0.60836
P43024	Cytochrome c oxidase subunit 6A1, mitochondrial OS=Mus musculus OX=10090 GN=Cox6a1 PE=1 SV=2	[R].TKPFPWGDGNHTLFHNPHVNPLPTGYEDE.[-]	P43024 2xOxidation [P85; P87]	P43024 [83-111]	0.0808792	0.085302	0.0882968	0.0908709	0.0781763	0.0837471	0.0863286	0.0785687	0.0766006	0.0833757	1.03546	1.01203	0.889825	0.842961	1.06651	0.969357	0.0973787	0.477593	-0.0135161	0.320942
P35486	Pyruvate dehydrogenase E1 component subunit alpha, somatic form, mitochondrial OS=Mus musculus OX=10090 GN=Pdha1 PE=1 SV=1	[K].NFYGGNGIVGAQVPLGAGIALACK.[Y]	P35486 1xOxidation [P172]	P35486 [159-182]	0.00335165	0.00322583	0.00317591	0.00349759	0.00348307	0.0032183	0.00321775	0.00338575	0.0032368	0.00313485	0.960214	0.997495	1.06607	0.925439	0.900027	0.96985	0.0651228	0.332519	-0.0132956	0.478183
Q61554	Fibrillin-1 OS=Mus musculus OX=10090 GN=Fbn1 PE=1 SV=2	[R].GQCVNTPGDFECK.[C]	Q61554 1xOxidation [P1092]	Q61554 [1086-1098]	0.00365911	0.00393505	0.00364466	0.00340947	0.00350035	0.00393606	0.00355785	0.00326049	0.00341148	0.0034192	1.07569	0.904144	0.894594	1.00059	0.976817	0.970366	0.0744549	0.416236	-0.0130644	0.38066
P55264	Adenosine kinase OS=Mus musculus OX=10090 GN=Adk PE=1 SV=2	[K].AADAHVDAHYYEQNEQPTGTCAACITGGNR.[S]	P55264 1xOxidation [P135]	P55264 [119-148]	0.00234274	0.0011678	0.00146881	0.00168814	0.00128959	0.0014151	0.00153195	0.00123329	0.00188239	0.00126828	0.604036	1.31183	0.839652	1.11507	0.983475	0.970811	0.268788	0.606823	-0.0128651	0.216938
Q3TBW2	39S ribosomal protein L10, mitochondrial OS=Mus musculus OX=10090 GN=Mrpl10 PE=1 SV=2	[K].SVPFLPLLGGCVDDTILSR.[Q]	Q3TBW2 1xOxidation [P175]	Q3TBW2 [170-188]	0.0140799	0.0142565	0.0139692	0.0170533	0.0162354	0.0118324	0.0198638	0.0144184	0.0155674	0.0110071	0.840372	1.39332	1.03216	0.912866	0.677966	0.971337	0.268517	0.762576	-0.0126303	0.117717
P45591	Cofilin-2 OS=Mus musculus OX=10090 GN=Cfl2 PE=1 SV=1	[K].KEDLVFIFWAPESAPLK.[S]	P45591 2xOxidation [P106; P110]	P45591 [96-112]	0.00784288	0.0078606	0.00732516	0.00787738	0.00792016	0.00764816	0.00735215	0.00702924	0.00789785	0.00785688	0.975172	0.935318	0.959602	1.0026	0.99201	0.97294	0.0266536	0.0875	-0.0119139	1.05799
Q4VAA2	Protein CDV3 OS=Mus musculus OX=10090 GN=Cdv3 PE=1 SV=2	[K].TAPVQAPPAPVTVTETPEPAMPSGVYRPPGAR.[L]	Q4VAA2 1xOxidation [P]	Q4VAA2 [167-198]	0.0129347	0.0136889	0.013275	0.0126877	0.0136152	0.0135145	0.0129345	0.0122478	0.0104283	0.0153937	1.04483	0.944891	0.922619	0.821921	1.13062	0.972975	0.118487	0.65354	-0.0118983	0.184728
P19536	Cytochrome c oxidase subunit 5B, mitochondrial OS=Mus musculus OX=10090 GN=Cox5b PE=1 SV=1	[K].GLDPYNMLPPK.[A]	P19536 2xOxidation [P60; ]	P19536 [57-67]	0.00203626	0.00208931	0.00188834	0.0018983	0.00208575	0.00199928	0.00208597	0.00191686	0.00175607	0.00198915	0.981836	0.998403	1.0151	0.925076	0.95369	0.974822	0.0358791	0.180933	-0.0110747	0.742482
E9PZF0	Nucleoside diphosphate kinase OS=Mus musculus OX=10090 GN=Gm20390 PE=3 SV=1	[K].EIHLWFKPEELIDYK.[S]	E9PZF0 1xOxidation [P251]	E9PZF0 [244-258]	0.0055961	0.00521509	0.00533941	0.00484297	0.00533891	0.00530952	0.00583816	0.00473426	0.00473082	0.0050546	0.94879	1.11948	0.886663	0.976842	0.946747	0.975704	0.086837	0.552003	-0.0106821	0.258059
D3Z7X0	Acyl-Coenzyme A dehydrogenase family, member 12 OS=Mus musculus OX=10090 GN=Acad12 PE=1 SV=1	[R].WSPSPLIEDLK.[E]	D3Z7X0 2xOxidation [P188; P190]	D3Z7X0 [186-196]	0.00251965	0.00205146	0.00239896	0.00217941	0.00263683	0.00194258	0.00236908	0.00263451	0.00204036	0.00242359	0.770974	1.15483	1.09819	0.936197	0.919127	0.975862	0.153103	0.666768	-0.0106117	0.176025
F8VPN4	Amylo-1,6-glucosidase, 4-alpha-glucanotransferase OS=Mus musculus OX=10090 GN=Agl PE=1 SV=1	[R].CESEEQEDGGGCYDIPNWSSLK.[Y]	F8VPN4 1xOxidation [P926]	F8VPN4 [911-932]	0.000928418	0.00107767	0.000891433	0.000815207	0.00112768	0.000871598	0.0010669	0.000999673	0.000799334	0.000957234	0.9388	0.990002	1.12142	0.980528	0.848849	0.97592	0.098635	0.550842	-0.0105856	0.258973
P17665	Cytochrome c oxidase subunit 7C, mitochondrial OS=Mus musculus OX=10090 GN=Cox7c PE=1 SV=1	[R].SHYEEGPGK.[N]	P17665 1xOxidation [P23]	P17665 [17-25]	0.0142732	0.0139267	0.0149328	0.0140959	0.0122707	0.0129743	0.0139735	0.0140244	0.0123029	0.0141951	0.908997	1.00336	0.939171	0.872805	1.15683	0.976231	0.111739	0.569709	-0.0104472	0.244347
P02463	Collagen alpha-1(IV) chain OS=Mus musculus OX=10090 GN=Col4a1 PE=1 SV=4	[R].GPPGGVGFPGSR.[G]	P02463 2xOxidation [P588; P594]	P02463 [586-597]	0.31103	0.31741	0.317936	0.307402	0.300024	0.311066	0.293992	0.313003	0.30209	0.297785	1.00012	0.926222	0.984482	0.982717	0.992538	0.977215	0.0293368	0.160926	-0.0100099	0.793374
Q9D6J6	NADH dehydrogenase [ubiquinone] flavoprotein 2, mitochondrial OS=Mus musculus OX=10090 GN=Ndufv2 PE=1 SV=2	[R].DTPENNPDTPFDFTPENYK.[R]	Q9D6J6 1xOxidation [P56]	Q9D6J6 [42-60]	0.00248733	0.00255561	0.0024415	0.00226822	0.00259553	0.00239781	0.0023917	0.00250834	0.00238384	0.00236008	0.964009	0.935865	1.02738	1.05097	0.909288	0.977503	0.0601134	0.411149	-0.00988206	0.386001
P09542	Myosin light chain 3 OS=Mus musculus OX=10090 GN=Myl3 PE=1 SV=4	[K].IEFTPEQIEEFK.[E]	P09542 1xOxidation [P57]	P09542 [53-64]	0.0010564	0.00099447	0.000940455	0.0010377	0.00100831	0.00110335	0.00101185	0.000909474	0.000998043	0.000907927	1.04445	1.01748	0.967057	0.961786	0.900444	0.978243	0.0556133	0.447151	-0.00955319	0.349545
Q9Z2I9	Succinate--CoA ligase [ADP-forming] subunit beta, mitochondrial OS=Mus musculus OX=10090 GN=Sucla2 PE=1 SV=2	[R].SFQGPVLIGSAQGGVNIEDVAAENPEAIVK.[E]	Q9Z2I9 1xOxidation [P200]	Q9Z2I9 [176-205]	0.000844374	0.000873519	0.000760841	0.000797022	0.000826456	0.000885921	0.000936905	0.000717032	0.000732989	0.000751828	1.0492	1.07256	0.94242	0.919661	0.909701	0.97871	0.0763935	0.614058	-0.00934599	0.211791
Q60749	KH domain-containing, RNA-binding, signal transduction-associated protein 1 OS=Mus musculus OX=10090 GN=Khdrbs1 PE=1 SV=2	[R].ASPATQPPPLLPPSTPGPDATVVGSAPTPLLPPSATAAVK.[M]	Q60749 5xOxidation [P65; P68; P69; P72; P74]	Q60749 [57-96]	0.0512239	0.0723982	0.0687528	0.0725983	0.0457797	0.0759124	0.0737347	0.0508772	0.0495137	0.0445498	1.48197	1.01846	0.740002	0.682023	0.973134	0.979118	0.316183	0.720081	-0.0091648	0.142619
Q8VCF0	Mitochondrial antiviral-signaling protein OS=Mus musculus OX=10090 GN=Mavs PE=1 SV=1	[R].ETPSCPKPVQDTQPPESPVENSEQLLQTNSGAVAR.[M]	Q8VCF0 5xOxidation [P138; P141; P143; P150; P153]	Q8VCF0 [136-170]	0.00982022	0.0115422	0.0105994	0.0102403	0.0080738	0.0111647	0.00916248	0.00934903	0.00867877	0.00998142	1.13691	0.793825	0.882037	0.847514	1.23627	0.979312	0.195003	0.670872	-0.00907906	0.17336
O70258	Epsilon-sarcoglycan OS=Mus musculus OX=10090 GN=Sgce PE=1 SV=2	[R].GGRVPLPINDMK.[E]	O70258 3xOxidation [P212; P214; ]	O70258 [208-219]	0.1418	0.131679	0.140728	0.177731	0.143777	0.155873	0.143629	0.149593	0.136928	0.125712	1.09925	1.09075	1.06299	0.770425	0.874354	0.979553	0.148706	0.677577	-0.00897188	0.169041
P09411	Phosphoglycerate kinase 1 OS=Mus musculus OX=10090 GN=Pgk1 PE=1 SV=4	[K].DCVGPEVENACANPAAGTVILLENLR.[F]	P09411 1xOxidation [P]	P09411 [98-123]	0.000682455	0.00068282	0.000683132	0.000702023	0.000685993	0.000579119	0.00088325	0.000649668	0.00066975	0.000583664	0.848582	1.29353	0.951015	0.95403	0.850832	0.979598	0.182874	0.812049	-0.00895193	0.0904177
Q9DCX2	ATP synthase subunit d, mitochondrial OS=Mus musculus OX=10090 GN=Atp5pd PE=1 SV=3	[R].LASLSEKPPAIDWAYYR.[A]	Q9DCX2 2xOxidation [P49; P50]	Q9DCX2 [42-58]	0.0221749	0.0209717	0.020506	0.0197613	0.0218418	0.0199607	0.0244023	0.0188334	0.0201756	0.0196381	0.900151	1.16358	0.918431	1.02096	0.899106	0.980446	0.114117	0.699815	-0.00857611	0.155017
A2ASS6	Titin OS=Mus musculus OX=10090 GN=Ttn PE=1 SV=1	[R].SPTPPSIAAK.[A]	A2ASS6 3xOxidation [P265; P267; P268]	A2ASS6 [264-273]	0.0348287	0.0388288	0.0206831	0.0274387	0.0233671	0.0242121	0.0316579	0.0260624	0.0283932	0.0259557	0.695177	0.81532	1.26008	1.03479	1.11078	0.98323	0.227345	0.591174	-0.00734478	0.228285
Q9DB77	Cytochrome b-c1 complex subunit 2, mitochondrial OS=Mus musculus OX=10090 GN=Uqcrc2 PE=1 SV=1	[K].NALANPLYCPDYR.[M]	Q9DB77 1xOxidation [P]	Q9DB77 [184-196]	0.00556831	0.00519515	0.00530419	0.0050649	0.00549948	0.00521999	0.00514681	0.00509358	0.0054501	0.00523529	0.937446	0.990696	0.960295	1.07605	0.95196	0.98329	0.0553885	0.496527	-0.00731852	0.304057
P18760	Cofilin-1 OS=Mus musculus OX=10090 GN=Cfl1 PE=1 SV=3	[K].KEDLVFIFWAPENAPLK.[S]	P18760 2xOxidation [P106; P110]	P18760 [96-112]	0.0103552	0.0114906	0.0100779	0.0106846	0.011709	0.0113656	0.0109075	0.0105554	0.00953814	0.0109471	1.09757	0.949255	1.04739	0.892698	0.934931	0.984369	0.084952	0.646296	-0.00684195	0.189568
Q9D819	Inorganic pyrophosphatase OS=Mus musculus OX=10090 GN=Ppa1 PE=1 SV=1	[K].HTGCCGDNDPIDVCEIGSK.[V]	Q9D819 1xOxidation [P119]	Q9D819 [110-128]	0.00973508	0.00994148	0.0110091	0.0100123	0.00997516	0.00943571	0.0100613	0.00955893	0.0105355	0.0101761	0.969248	1.01206	0.868278	1.05226	1.02014	0.984397	0.0713454	0.625725	-0.00682988	0.203617
O08749	Dihydrolipoyl dehydrogenase, mitochondrial OS=Mus musculus OX=10090 GN=Dld PE=1 SV=2	[R].RPFTQNLGLEELGIELDPK.[G]	O08749 1xOxidation [P333]	O08749 [316-334]	0.000578908	0.00052948	0.000466145	0.000479916	0.000469141	0.00053778	0.000551859	0.000434836	0.000516244	0.000442058	0.928957	1.04227	0.932834	1.0757	0.942272	0.984406	0.0692672	0.629346	-0.00682577	0.201111
Q9CPP6	NADH dehydrogenase [ubiquinone] 1 alpha subcomplex subunit 5 OS=Mus musculus OX=10090 GN=Ndufa5 PE=1 SV=3	[K].TTGLVGLAVCDTPHER.[L]	Q9CPP6 1xOxidation [P20]	Q9CPP6 [8-23]	0.0121751	0.0114164	0.0116799	0.0116396	0.0118912	0.0115999	0.012946	0.0117799	0.0110876	0.0104295	0.952756	1.13399	1.00857	0.952579	0.87708	0.984994	0.0955121	0.71911	-0.00656649	0.143204
P17751	Triosephosphate isomerase OS=Mus musculus OX=10090 GN=Tpi1 PE=1 SV=4	[K].VVLAYEPVWAIGTGK.[T]	P17751 1xOxidation [P217]	P17751 [211-225]	0.00529001	0.00512924	0.00539126	0.0047216	0.00499961	0.00511702	0.00554786	0.00468979	0.00460549	0.00515484	0.967297	1.08161	0.869887	0.97541	1.03105	0.985051	0.079232	0.679018	-0.00654123	0.168119
Q61171	Peroxiredoxin-2 OS=Mus musculus OX=10090 GN=Prdx2 PE=1 SV=3	[R].LVQAFQYTDEHGEVCPAGWKPGSDTIKPNVDDSK.[E]	Q61171 2xOxidation [P173; P178]	Q61171 [158-191]	0.00398042	0.00380919	0.00336868	0.00370036	0.00369343	0.00350837	0.00379077	0.00379586	0.00363477	0.00347172	0.881408	0.995165	1.12681	0.982275	0.939973	0.985126	0.0908007	0.659107	-0.00650828	0.181044
[truncated: 344 more rows]
[truncated: 49 more columns]

## Sheet: WB Quant
Densitometric quantitation of western blots. Protein of interest relative to Ponceau S.
	Fig. 1C	HADH WB
		WT	KO
		1.02595	1.04955
[truncated: 6 more rows]

## Sheet: Enzymes
Enzyme Activity Assays
[truncated: 7 more rows]

[truncated: 1 more sheets: XF]
