# Supplementary material for: ALKBH7 mediates necrosis via rewiring of glyoxal metabolism
Source: eLife journal article supplement (doi:10.7554/elife.58573), 2020-08-14
Supplement: supp [file elife-58573-supp-v1.zip › elife_poa_e58573_Source_data_2.xlsx]

## Sheet: Abnd Promx Raw
Complete RAW data set for protomic protein abundance (peptides grouped by protein), used to generate Figure 2A.
A = knockout, B = wild-type
Accession	Description	Coverage [%]	# Peptides	# PSMs	# Unique Peptides	# Protein Groups	# AAs	MW [kDa]	calc. pI	Score Mascot: Mascot	Score Sequest HT: Sequest HT	# Peptides (by Search Engine): Mascot	# Peptides (by Search Engine): Sequest HT	# Razor Peptides	Abundances (Grouped): Group B	Abundances (Grouped): Group A	Abundances (Grouped) CV [%]: Group B	Abundances (Grouped) CV [%]: Group A	Abundances (Normalized): F2: 126, Sample, n/a, Group B	Abundances (Normalized): F2: 128N, Sample, n/a, Group B	Abundances (Normalized): F2: 128C, Sample, n/a, Group B	Abundances (Normalized): F2: 130N, Sample, n/a, Group B	Abundances (Normalized): F2: 131C, Sample, n/a, Group B	Abundances (Normalized): F2: 127N, Sample, n/a, Group A	Abundances (Normalized): F2: 127C, Sample, n/a, Group A	Abundances (Normalized): F2: 129N, Sample, n/a, Group A	Abundances (Normalized): F2: 129C, Sample, n/a, Group A	Abundances (Normalized): F2: 131N, Sample, n/a, Group A	Found in Sample: [S11] F2: 126, Sample, n/a, Group B	Found in Sample: [S14] F2: 128N, Sample, n/a, Group B	Found in Sample: [S15] F2: 128C, Sample, n/a, Group B	Found in Sample: [S18] F2: 130N, Sample, n/a, Group B	Found in Sample: [S19] F2: 130C, Sample, n/a, Group B	Found in Sample: [S21] F2: 131C, Sample, n/a, Group B	Found in Sample: [S12] F2: 127N, Sample, n/a, Group A	Found in Sample: [S13] F2: 127C, Sample, n/a, Group A	Found in Sample: [S16] F2: 129N, Sample, n/a, Group A	Found in Sample: [S17] F2: 129C, Sample, n/a, Group A	Found in Sample: [S20] F2: 131N, Sample, n/a, Group A	Modifications	Oxidation (P) Count	Oxidation (P) Positions	Ratio A/B (KO/WT)	P-value
Q6ZPJ3	(E3-independent) E2 ubiquitin-conjugating enzyme UBE2O OS=Mus musculus OX=10090 GN=Ube2o PE=1 SV=3	4	3	6	3	1	1288	140.7	5.06	69	15.86	3	3	0	143.68	162.56	8.29	11.38	132.3	162	150.3	138.9	134.9	154	150.6	147.9	192.7	167.6	High	High	High	High	High	High	High	High	High	High	High		0		1.1314	0.185054
O55028	[3-methyl-2-oxobutanoate dehydrogenase [lipoamide]] kinase, mitochondrial OS=Mus musculus OX=10090 GN=Bckdk PE=1 SV=1	18	8	29	7	1	412	46.6	8.91	284	79.53	8	8	0	1210.22	1202.2	9.13	10.19	1137.7	1330.6	1122.5	1357.8	1102.5	1129	1156.2	1141.8	1420	1164	High	High	High	High	High	High	High	High	High	High	High		0		0.993373	0.863313
Q8VDP3	[F-actin]-monooxygenase MICAL1 OS=Mus musculus OX=10090 GN=Mical1 PE=1 SV=1	3	4	5	4	1	1048	116.7	6.05	20	4.91	2	3	0	158.46	153.56	6.58	11.78	159.6	170.1	156.8	157.8	148	132.2	146.1	151.5	181.5	156.5	High	High	High	High	High	High	High	High	High	High	High		0		0.969077	0.638881
P54923	[Protein ADP-ribosylarginine] hydrolase OS=Mus musculus OX=10090 GN=Adprh PE=1 SV=1	28	9	27	9	1	362	40	5.76	372	51.78	9	8	0	1660.8	1705.06	3.98	2.95	1712.4	1610.2	1737.9	1628.3	1615.2	1692.1	1641.3	1698.5	1712.3	1781.1	High	High	High	High	High	High	High	High	High	High	High		0		1.02665	0.300217
Q8BGK2	[Protein ADP-ribosylarginine] hydrolase-like protein 1 OS=Mus musculus OX=10090 GN=Adprhl1 PE=1 SV=1	47	16	156	16	1	353	39.9	5.91	1370	355.51	16	16	0	19510.7	17564.8	12.37	18.44	17978.7	21557.4	17170.1	22686.8	18160.4	19353.2	12290.5	19046.7	20401.7	16731.7	High	High	High	High	High	High	High	High	High	High	High		0		0.900264	0.384636
Q8BFP9	[Pyruvate dehydrogenase (acetyl-transferring)] kinase isozyme 1, mitochondrial OS=Mus musculus OX=10090 GN=Pdk1 PE=1 SV=2	43	17	107	13	1	434	49	8.19	906	203.5	17	17	4	10054.4	10099.5	23.64	23.95	7535.7	13389.2	8581.6	12209.9	8555.7	8801.6	7018.9	9654.7	12956.1	12066.4	High	High	High	High	High	High	High	High	High	High	High		0		1.00449	0.979817
Q9JK42	[Pyruvate dehydrogenase (acetyl-transferring)] kinase isozyme 2, mitochondrial OS=Mus musculus OX=10090 GN=Pdk2 PE=1 SV=2	48	17	113	13	1	407	46	6.61	1138	262.47	16	17	0	9778.34	9060.4	23.16	15.68	7477.2	12941.4	8221.2	11692.4	8559.5	8520.8	6960.1	9256.2	10701.1	9863.8	High	High	High	High	High	High	High	High	High	High	High		0		0.926579	0.630163
O70571	[Pyruvate dehydrogenase (acetyl-transferring)] kinase isozyme 4, mitochondrial OS=Mus musculus OX=10090 GN=Pdk4 PE=1 SV=1	33	12	50	9	1	412	46.6	7.08	429	98.58	11	11	1	3244.14	2736.2	24.19	17.07	2184.5	3923.8	3168.7	4211.7	2732	2713.1	2102.4	3114.9	2495.4	3255.2	High	High	High	High	High	High	High	High	High	High	High		0		0.843428	0.388729
Q3UV70	[Pyruvate dehydrogenase [acetyl-transferring]]-phosphatase 1, mitochondrial OS=Mus musculus OX=10090 GN=Pdp1 PE=1 SV=1	40	16	60	16	1	538	61.1	6.67	564	133.31	14	16	0	4170.04	4298.76	3.66	4.25	4211	4361.8	4246.7	3938.6	4092.1	4233.7	4079.1	4217.4	4541.4	4422.2	High	High	High	High	High	High	High	High	High	High	High		0		1.03087	0.448695
Q99JT9	1,2-dihydroxy-3-keto-5-methylthiopentene dioxygenase OS=Mus musculus OX=10090 GN=Adi1 PE=1 SV=1	20	3	8	3	1	179	21.5	5.5	39	14.76	3	3	0	1132.74	1161.96	4.75	3.37	1198.6	1134	1148.3	1053.7	1129.1	1196.5	1203	1109.2	1160.9	1140.2	High	High	High	High	High	High	High	High	High	High	High		0		1.0258	0.325842
Q9D6Y9	1,4-alpha-glucan-branching enzyme OS=Mus musculus OX=10090 GN=Gbe1 PE=1 SV=1	28	18	101	18	1	702	80.3	6.43	1107	206.1	18	18	0	8987.38	9161.7	4.36	3.45	9481.9	8463.5	9156.4	8610.7	9224.4	9158.8	9394.9	9506.6	9049.1	8699.1	High	High	High	High	High	High	High	High	High	High	High		0		1.0194	0.547435
Q9DCT1	1,5-anhydro-D-fructose reductase OS=Mus musculus OX=10090 GN=Akr1e2 PE=1 SV=1	31	10	41	9	1	301	34.4	7.33	173	70.23	10	10	0	2862.04	2647.06	3.05	5.59	2994.8	2750.3	2849.4	2836.1	2879.6	2584.5	2752.4	2844.5	2576.5	2477.4	High	High	High	High	High	High	High	High	High	High	High		0		0.924886	0.0779581
Q64433	10 kDa heat shock protein, mitochondrial OS=Mus musculus OX=10090 GN=Hspe1 PE=1 SV=2	77	12	339	12	1	102	11	8.35	1663	517.39	11	12	0	56166.5	50824.4	4.67	7.63	57005.1	51883.8	55822.4	56689.3	59431.7	53601.4	53715	52977.3	44806.4	49021.9	High	High	High	High	High	High	High	High	High	High	High		0		0.904889	0.104118
O08810	116 kDa U5 small nuclear ribonucleoprotein component OS=Mus musculus OX=10090 GN=Eftud2 PE=1 SV=1	24	16	42	15	1	971	109.3	5	409	85.4	14	16	0	1012.32	1023.8	7.22	2.6	922.3	1137.7	1017.8	1015.3	968.5	1034.3	991.2	1031.1	1003.8	1058.6	High	High	High	High	High	High	High	High	High	High	High		0		1.01134	0.814044
Q9DAK9	14 kDa phosphohistidine phosphatase OS=Mus musculus OX=10090 GN=Phpt1 PE=1 SV=1	52	6	70	6	1	124	14	5.53	623	129.98	6	6	0	8555.06	8286.18	3.16	5.93	8776.9	8452.2	8590	8364.8	8591.4	8771.8	8617.8	7648.9	7881.6	8510.8	High	High	High	High	High	High	High	High	High	High	High		0		0.968571	0.247911
Q9CQV8	14-3-3 protein beta/alpha OS=Mus musculus OX=10090 GN=Ywhab PE=1 SV=3	68	16	369	7	1	246	28.1	4.83	2206	569.71	16	16	0	4874.08	5157.88	3.25	2.91	4889.9	5038.5	4949	4919.2	4573.8	5354.7	5156.9	4973.9	5245	5058.9	High	High	High	High	High	High	High	High	High	High	High		0		1.05823	0.0368101
P62259	14-3-3 protein epsilon OS=Mus musculus OX=10090 GN=Ywhae PE=1 SV=1	78	23	575	20	1	255	29.2	4.74	5273	1047.85	22	23	5	53736.1	54632.3	2.16	1.49	52365.8	55621	53532.7	53976.9	53183.9	54931.7	54536.7	53277.1	55342.7	55073.4	High	High	High	High	High	High	High	High	High	High	High		0		1.01668	0.257821
P68510	14-3-3 protein eta OS=Mus musculus OX=10090 GN=Ywhah PE=1 SV=2	73	18	263	11	1	246	28.2	4.89	1870	406.76	18	17	2	6206.78	6607.38	5.78	2.49	5782	6582.5	6501.9	6401.6	5765.9	6775.8	6569.6	6396.3	6523.2	6772	High	High	High	High	High	High	High	High	High	High	High		0		1.06454	0.18063
P61982	14-3-3 protein gamma OS=Mus musculus OX=10090 GN=Ywhag PE=1 SV=2	69	17	408	10	1	247	28.3	4.89	2527	635.49	17	17	2	31565.4	31309.7	1.93	1.09	30788.1	32003.5	30962.7	32315	31757.8	31719.5	30961.3	31246	31015.6	31606	High	High	High	High	High	High	High	High	High	High	High		0		0.991898	0.569675
P68254	14-3-3 protein theta OS=Mus musculus OX=10090 GN=Ywhaq PE=1 SV=1	79	21	317	15	1	245	27.8	4.78	2218	534.57	20	21	1	9676.48	10441.2	3.34	5.3	9836	9946	9931	9580.9	9088.5	11151.3	10656	9947.5	9815.3	10636.1	High	High	High	High	High	High	High	High	High	High	High		0		1.07903	0.0614618
P63101	14-3-3 protein zeta/delta OS=Mus musculus OX=10090 GN=Ywhaz PE=1 SV=1	79	22	418	13	1	245	27.8	4.79	3455	739.5	20	22	6	33515.2	36083	2.23	1.92	34356.1	33548.2	33875.3	33286	32510.5	36473.4	36306.9	36006.2	34931.8	36696.8	High	High	High	High	High	High	High	High	High	High	High		0		1.07662	0.00435349
P58871	182 kDa tankyrase-1-binding protein OS=Mus musculus OX=10090 GN=Tnks1bp1 PE=1 SV=2	12	13	27	13	1	1720	181.7	4.88	240	64.41	12	13	0	1801.28	1978.64	3.14	7.43	1855.9	1777.3	1864.5	1750.4	1758.3	2176.7	2070.1	1826.2	1854.1	1966.1	High	High	High	High	High	High	High	High	High	High	High		0		1.09846	0.0544998
Q9DBL9	1-acylglycerol-3-phosphate O-acyltransferase ABHD5 OS=Mus musculus OX=10090 GN=Abhd5 PE=1 SV=1	9	2	4	2	1	351	39.1	6.79	28	8.68	2	2	0	236.8	233.24	4.16	4.84	247.9	240.4	245.5	226	224.2	243.7	228	216	240.2	238.3	High	High	High	High	High	High	High	High	High	High	High		0		0.984966	0.690172
O35083	1-acyl-sn-glycerol-3-phosphate acyltransferase alpha OS=Mus musculus OX=10090 GN=Agpat1 PE=1 SV=1	20	3	6	3	1	285	31.7	9.14	135	18.28	3	3	0	#DIV/0!	#DIV/0!													High	High	High	High	High	High	High	High	High	High	High		0		#DIV/0!	#DIV/0!
Q8K3K7	1-acyl-sn-glycerol-3-phosphate acyltransferase beta OS=Mus musculus OX=10090 GN=Agpat2 PE=1 SV=1	28	8	18	8	1	278	31	8.88	191	38.68	6	8	0	1103.84	1098.6	5.62	9.44	1174.7	1098.9	1151.5	1097.2	996.9	1270.3	1049.8	1121.2	1030.1	1021.6	High	High	High	High	High	High	High	High	High	High	High		0		0.995253	0.867792
Q9D1E8	1-acyl-sn-glycerol-3-phosphate acyltransferase epsilon OS=Mus musculus OX=10090 GN=Agpat5 PE=2 SV=2	20	6	11	6	1	365	42.2	9.38	74	20.43	5	6	0	626.94	651.1	6.35	10.21	564.7	639.2	679.5	647.5	603.8	717	725.4	587.8	592.2	633.1	High	High	High	High	High	High	High	High	High	High	High		0		1.03854	0.617848
Q9D517	1-acyl-sn-glycerol-3-phosphate acyltransferase gamma OS=Mus musculus OX=10090 GN=Agpat3 PE=1 SV=2	32	15	85	15	1	376	43.3	8.51	581	187.13	15	15	0	10410.8	9454.16	2.55	6.48	10335.2	10358.7	10721.3	10126.9	10512.1	9755	10351.9	9021.8	9322	8820.1	High	High	High	High	High	High	High	High	High	High	High		0		0.908107	0.0436167
A2AIG8	1-aminocyclopropane-1-carboxylate synthase-like protein 1 OS=Mus musculus OX=10090 GN=Accs PE=2 SV=1	2	1	2	1	1	502	56.8	6.11	0	3.1	1	1	0	119.7	128.74	6.13	12.71	114.8	120.9	126.3	108.8	127.7	139.8	101.9	127.7	130.5	143.8	High	High	High	High	High	High	High	High	High	High	High		0		1.07552	0.326474
P51432	1-phosphatidylinositol 4,5-bisphosphate phosphodiesterase beta-3 OS=Mus musculus OX=10090 GN=Plcb3 PE=1 SV=2	3	3	15	2	1	1234	139.4	5.94	23	30.75	2	3	1	9575.98	8246.98	13.31	9.7	10723.5	10271.7	8825.8	7461.4	10597.5	8770.4	7960.6	6964.1	8845.2	8694.6	High	High	High	High	High	High	High	High	High	High	High		0		0.861215	0.123498
Q8R3B1	1-phosphatidylinositol 4,5-bisphosphate phosphodiesterase delta-1 OS=Mus musculus OX=10090 GN=Plcd1 PE=1 SV=2	34	19	79	19	1	756	85.8	6.21	824	175.13	19	19	0	4776.8	4762.42	3.5	3.45	4841.6	4717.7	5034.4	4543.2	4747.1	4902.6	4859.7	4489.4	4738.8	4821.6	High	High	High	High	High	High	High	High	High	High	High	Oxidation [P113]	0		0.99699	0.920211
Q4KWH5	1-phosphatidylinositol 4,5-bisphosphate phosphodiesterase eta-1 OS=Mus musculus OX=10090 GN=Plch1 PE=2 SV=1	1	2	4	2	1	1682	187.6	7.33	41	4.12	1	1	0	68.48	71.4	8.86	16	75	69.7	73.4	58.2	66.1	89.5	62.6	60.8	73.3	70.8	High	High	High	High	High	High	High	High	High	High	High		0		1.04264	0.629524
Q62077	1-phosphatidylinositol 4,5-bisphosphate phosphodiesterase gamma-1 OS=Mus musculus OX=10090 GN=Plcg1 PE=1 SV=2	12	12	35	12	1	1302	149.6	5.8	241	70.49	11	12	0	2515.12	2627.8	5.73	3.1	2252.4	2598.9	2536.6	2678.8	2508.9	2668	2646.8	2496	2616.3	2711.9	High	High	High	High	High	High	High	High	High	High	High		0		1.0448	0.274045
Q8CIH5	1-phosphatidylinositol 4,5-bisphosphate phosphodiesterase gamma-2 OS=Mus musculus OX=10090 GN=Plcg2 PE=1 SV=1	2	2	4	2	1	1265	147.5	6.77	35	8.8	2	2	0	215.68	214.58	6.74	8.16	216.3	220.2	239.7	198.9	203.3	228.4	195.1	195.9	228.8	224.7	High	High	High	High	High	High	High	High	High	High	High		0		0.9949	0.942031
Q91UZ1	1-phosphatidylinositol 4,5-bisphosphate phosphodiesterase OS=Mus musculus OX=10090 GN=Plcb4 PE=1 SV=1	2	3	8	3	1	1175	134.4	6.9		18.23		3	0	2984.12	2256.78	38.93	38.7	4153.3	1765.8	2141	2716.6	4143.9	1742.9	1647.9	1781.2	2380.6	3731.3	High	High	High	High	High	High	High	High	High	High	High		0		0.756263	0.161227
Q8K4D7	1-phosphatidylinositol 4,5-bisphosphate phosphodiesterase zeta-1 OS=Mus musculus OX=10090 GN=Plcz1 PE=1 SV=1	2	1	2	1	1	647	74.6	5.63		2.5		1	0	419.6	458.12	5.1	5.58	424	394.9	452.2	414.7	412.2	475.6	441	421.5	473.7	478.8	Medium	Medium	Medium	Medium	Medium	Medium	Medium	Medium	Medium	Medium	Medium	Oxidation [P571]	1	Oxidation [P571]	1.0918	0.0944392
Q5NCQ5	2-(3-amino-3-carboxypropyl)histidine synthase subunit 1 OS=Mus musculus OX=10090 GN=Dph1 PE=1 SV=1	2	1	1	1	1	438	48	6.84		0		1	0	#DIV/0!	#DIV/0!													High	High	High	High	High	High	High	High	High	High	High		0		#DIV/0!	#DIV/0!
P16330	2',3'-cyclic-nucleotide 3'-phosphodiesterase OS=Mus musculus OX=10090 GN=Cnp PE=1 SV=3	9	3	6	3	1	420	47.1	8.97	34	11.7	3	3	0	268.16	265.88	3.76	3.36	262	253	275.9	276.7	273.2	253.6	277.9	267.2	268.8	261.9	High	High	High	High	High	High	High	High	High	High	High		0		0.991498	0.754954
Q9CQ62	2,4-dienoyl-CoA reductase, mitochondrial OS=Mus musculus OX=10090 GN=Decr1 PE=1 SV=1	61	18	366	18	1	335	36.2	8.95	3446	757.84	18	18	0	44786.5	38460.2	7.67	7.54	42379.4	44473.5	41667	49316	46096.7	36700.8	37948.7	39489.3	42855	35307	High	High	High	High	High	High	High	High	High	High	High	Oxidation [P50]	0		0.858744	0.00993048
Q3TIU4	2',5'-phosphodiesterase 12 OS=Mus musculus OX=10090 GN=Pde12 PE=1 SV=2	18	9	17	9	1	608	67.5	6.92	162	33.32	8	9	0	584.08	572.06	1.76	4.52	598.9	590.9	579.2	577.9	573.5	581.5	607.9	536.7	568.5	565.7	High	High	High	High	High	High	High	High	High	High	High		0		0.979421	0.276697
Q3TXS7	26S proteasome non-ATPase regulatory subunit 1 OS=Mus musculus OX=10090 GN=Psmd1 PE=1 SV=1	41	36	185	36	1	953	105.7	5.39	1748	402.67	34	35	0	15599.8	16371.6	5.31	4.74	14381.6	16499.1	15785.4	16404.8	14928.3	16333.4	15231.1	16108.6	17096.6	17088.1	High	High	High	High	High	High	High	High	High	High	High		0		1.04947	0.281168
Q9Z2X2	26S proteasome non-ATPase regulatory subunit 10 OS=Mus musculus OX=10090 GN=Psmd10 PE=1 SV=3	13	2	4	2	1	231	25.1	6.06	40	7.52	2	2	0	385.42	361.8	7.27	7.42	378	372.3	387.8	435.3	353.7	336.8	335.6	374.9	399.2	362.5	High	High	High	High	High	High	High	High	High	High	High		0		0.938716	0.0675946
Q8BG32	26S proteasome non-ATPase regulatory subunit 11 OS=Mus musculus OX=10090 GN=Psmd11 PE=1 SV=3	39	18	80	18	1	422	47.4	6.48	667	161.48	18	17	0	5197.82	5315.84	7.86	5.66	4889.9	5715.2	5052.4	5628.1	4703.5	5328.2	4923.1	5165.8	5729.6	5432.5	High	High	High	High	High	High	High	High	High	High	High		0		1.02271	0.668015
Q9D8W5	26S proteasome non-ATPase regulatory subunit 12 OS=Mus musculus OX=10090 GN=Psmd12 PE=1 SV=4	50	23	115	22	1	456	52.9	7.06	766	210.32	22	23	1	8123.76	8316.8	7.09	4.86	7352	8885.5	8067.9	8645	7668.4	8257.8	7801	8162.3	8899.1	8463.8	High	High	High	High	High	High	High	High	High	High	High		0		1.02376	0.61521
Q9WVJ2	26S proteasome non-ATPase regulatory subunit 13 OS=Mus musculus OX=10090 GN=Psmd13 PE=1 SV=1	51	19	95	19	1	376	42.8	5.71	551	171.23	19	19	0	9722.62	9734.18	7.62	5.04	8723.2	10638.8	9415.3	10471.4	9364.4	9678.2	9130.5	9593.7	10491.4	9777.1	High	High	High	High	High	High	High	High	High	High	High		0		1.00119	0.978941
O35593	26S proteasome non-ATPase regulatory subunit 14 OS=Mus musculus OX=10090 GN=Psmd14 PE=1 SV=2	25	8	24	8	1	310	34.6	6.52	176	46.72	7	8	0	2504.64	2568.94	6.38	5.53	2261.6	2676.5	2606.6	2607.9	2370.6	2602.7	2370.6	2544.6	2768.2	2558.6	High	High	High	High	High	High	High	High	High	High	High		0		1.02567	0.598908
Q8VDM4	26S proteasome non-ATPase regulatory subunit 2 OS=Mus musculus OX=10090 GN=Psmd2 PE=1 SV=1	39	35	187	35	1	908	100.1	5.17	1315	388.9	34	35	0	16512.6	16678.9	6.07	3.55	15244.3	17384.3	16356.1	17817.6	15760.7	17154.2	15808.4	16577.4	17305.9	16548.5	High	High	High	High	High	High	High	High	High	High	High	Oxidation [P503]	0		1.01007	0.791507
P14685	26S proteasome non-ATPase regulatory subunit 3 OS=Mus musculus OX=10090 GN=Psmd3 PE=1 SV=3	34	16	92	16	1	530	60.7	8.44	878	192.42	16	16	0	9365.64	9481.48	11.08	6.41	7855.2	9917.2	9056.9	10927.8	9071.1	9243.9	8807.9	9215.4	10390	9750.2	High	High	High	High	High	High	High	High	High	High	High		0		1.01237	0.805235
O35226	26S proteasome non-ATPase regulatory subunit 4 OS=Mus musculus OX=10090 GN=Psmd4 PE=1 SV=1	46	14	85	2	1	376	40.7	4.79	1515	240.13	14	13	0	761.66	811.9	4.14	3.86	721.8	791.8	801	753.3	740.4	822.8	775.2	782.2	844.5	834.8	High	High	High	High	High	High	High	High	High	High	High		0		1.06596	0.144839
Q8BJY1	26S proteasome non-ATPase regulatory subunit 5 OS=Mus musculus OX=10090 GN=Psmd5 PE=1 SV=4	34	12	28	12	1	504	55.9	5.21	186	58.24	10	11	0	935.96	944.26	6.44	5.46	864.7	1012.7	965.4	970.8	866.2	966.2	862.4	939.3	1002.5	950.9	High	High	High	High	High	High	High	High	High	High	High		0		1.00887	0.864132
Q99JI4	26S proteasome non-ATPase regulatory subunit 6 OS=Mus musculus OX=10090 GN=Psmd6 PE=1 SV=1	43	20	66	20	1	389	45.5	5.52	465	124.64	17	19	0	6450.36	6451.02	4.44	2.57	6068.8	6787.8	6341.4	6766.9	6286.9	6446.6	6175.6	6504.1	6618	6510.8	High	High	High	High	High	High	High	High	High	High	High		0		1.0001	0.99718
P26516	26S proteasome non-ATPase regulatory subunit 7 OS=Mus musculus OX=10090 GN=Psmd7 PE=1 SV=2	33	8	39	8	1	321	36.5	6.77	367	85.5	7	7	0	2680.36	2597.3	6.62	2.93	2506.3	2665.7	2571.4	2996	2662.4	2510.2	2532.2	2600.2	2664.1	2679.8	High	High	High	High	High	High	High	High	High	High	High		0		0.969012	0.293755
Q9CX56	26S proteasome non-ATPase regulatory subunit 8 OS=Mus musculus OX=10090 GN=Psmd8 PE=1 SV=2	31	11	43	11	1	353	39.9	9.58	207	75.14	11	11	0	3198.26	3264.52	6.42	4.3	2907	3436.6	3185.7	3407.7	3054.3	3289.8	3130.2	3158.7	3485.3	3258.6	High	High	High	High	High	High	High	High	High	High	High		0		1.02072	0.596997
Q9CR00	26S proteasome non-ATPase regulatory subunit 9 OS=Mus musculus OX=10090 GN=Psmd9 PE=1 SV=1	37	8	29	8	1	222	24.7	6.43	280	62.4	7	8	0	2353.66	2427.56	5.74	4.21	2433.8	2218	2541.1	2192.9	2382.5	2567.9	2398.1	2320.4	2355.9	2495.5	High	High	High	High	High	High	High	High	High	High	High		0		1.0314	0.377671
P62334	26S proteasome regulatory subunit 10B OS=Mus musculus OX=10090 GN=Psmc6 PE=1 SV=1	67	22	112	22	1	389	44.1	7.49	1070	239.24	21	21	0	9949.14	10158	4.14	3.13	9376.7	10438.4	10093	10278.7	9558.9	10103.9	9724.3	10068.2	10583.9	10309.8	High	High	High	High	High	High	High	High	High	High	High		0		1.02099	0.485145
P62192	26S proteasome regulatory subunit 4 OS=Mus musculus OX=10090 GN=Psmc1 PE=1 SV=1	69	28	144	26	1	440	49.2	6.21	1017	312.38	28	28	2	13510.6	14183.6	4.34	5.67	12885.6	14344.6	13348.1	13997	12977.9	13971.4	13159	13799.4	14872	15116.2	High	High	High	High	High	High	High	High	High	High	High		0		1.04981	0.281736
O88685	26S proteasome regulatory subunit 6A OS=Mus musculus OX=10090 GN=Psmc3 PE=1 SV=2	64	25	151	25	1	442	49.5	5.19	1384	335.27	25	25	0	14102.5	14953.6	4.68	3.39	13216.5	14763.7	14432.1	14665.1	13435.1	15459.9	14202.6	14764	15363.8	14977.6	High	High	High	High	High	High	High	High	High	High	High		0		1.06035	0.15412
P54775	26S proteasome regulatory subunit 6B OS=Mus musculus OX=10090 GN=Psmc4 PE=1 SV=2	51	22	105	21	1	418	47.4	5.21	867	213.45	21	22	0	7254.48	7403.34	4.1	2.56	6930.3	7554.5	7343.1	7564.2	6880.3	7490	7120	7388.3	7637.6	7380.8	High	High	High	High	High	High	High	High	High	High	High		0		1.02052	0.4551
P46471	26S proteasome regulatory subunit 7 OS=Mus musculus OX=10090 GN=Psmc2 PE=1 SV=5	75	30	158	30	1	433	48.6	5.95	1700	354.31	26	30	0	14729.4	15221.6	4.16	4.62	13945.8	15470.7	14710	15356	14164.7	15050.4	14380	14963.9	16285.9	15427.6	High	High	High	High	High	High	High	High	High	High	High		0		1.03341	0.317682
P62196	26S proteasome regulatory subunit 8 OS=Mus musculus OX=10090 GN=Psmc5 PE=1 SV=1	65	25	138	23	1	406	45.6	7.55	1171	282.79	24	25	0	9926.34	10697	6.35	7.4	9373.6	10850.1	10190.2	10116.2	9101.6	10613.1	9660.9	10256.8	11566.9	11387.3	High	High	High	High	High	High	High	High	High	High	High		0		1.07764	0.27154
Q3UHX2	28 kDa heat- and acid-stable phosphoprotein OS=Mus musculus OX=10090 GN=Pdap1 PE=1 SV=1	41	8	30	8	1	181	20.6	7.39	343	62.72	8	8	0	2363.22	2720.3	10.96	15.87	2023.9	2745.1	2266	2384.6	2396.5	3381.3	2784.7	2491.5	2218	2726	High	High	High	High	High	High	High	High	High	High	High		0		1.1511	0.247572
G5E8U5	28S ribosomal protein S10, mitochondrial OS=Mus musculus OX=10090 GN=Mrps10 PE=1 SV=1	39	6	7	6	1	201	22.8	9.11		27.72		6	0	986.6	1074.66	10.99	9.85	873.7	1179.8	937.6	1022	919.9	1177.7	1157.4	947.8	976.2	1114.2	High	High	High	High	High	High	High	High	High	High	High		0		1.08926	0.268529
Q9DCA2	28S ribosomal protein S11, mitochondrial OS=Mus musculus OX=10090 GN=Mrps11 PE=1 SV=2	14	2	6	2	1	191	20.2	10.77	38	11.02	2	2	0	238.38	256.7	7.4	5.14	262.1	227.3	246.8	211	244.7	263.7	259.4	239.3	248.1	273	High	High	High	High	High	High	High	High	High	High	High		0		1.07685	0.108983
O35680	28S ribosomal protein S12, mitochondrial OS=Mus musculus OX=10090 GN=Mrps12 PE=2 SV=1	37	4	9	4	1	139	15.4	10.71	83	19.08	3	4	0	744.2	798.78	6.99	8.46	770.8	808.3	699.2	767.4	675.3	849.7	822.7	858	695.6	767.9	High	High	High	High	High	High	High	High	High	High	High		0		1.07334	0.234657
Q9CR88	28S ribosomal protein S14, mitochondrial OS=Mus musculus OX=10090 GN=Mrps14 PE=1 SV=1	12	1	2	1	1	128	14.9	11.39	69	5.64	1	1	0	108.28	111.42	6.96	3.89	112.4	108.9	117.2	98.7	104.2	106.2	112.8	110.9	109.4	117.8	High	High	High	High	High	High	High	High	High	High	High		0		1.029	0.490827
Q9DC71	28S ribosomal protein S15, mitochondrial OS=Mus musculus OX=10090 GN=Mrps15 PE=1 SV=2	40	11	29	11	1	258	29.4	10.13	151	51.19	10	11	0	1881.08	1918.26	7.44	8.93	2070.3	1988.6	1874.4	1792.2	1679.9	2114.6	2088.9	1744.2	1841.5	1802.1	High	High	High	High	High	High	High	High	High	High	High		0		1.01977	0.449485
Q9CPX7	28S ribosomal protein S16, mitochondrial OS=Mus musculus OX=10090 GN=Mrps16 PE=1 SV=1	30	4	16	3	1	135	15.2	9.67	101	27.37	4	4	1	1261.96	1399.96	7.9	9.75	1160.5	1444.9	1206.2	1284.2	1214	1527.6	1464.1	1257.7	1247.6	1502.8	High	High	High	High	High	High	High	High	High	High	High		0		1.10935	0.158742
Q9CQE3	28S ribosomal protein S17, mitochondrial OS=Mus musculus OX=10090 GN=Mrps17 PE=1 SV=1	57	5	17	5	1	120	13.4	9.89	113	35.84	5	5	0	1154	1263.96	10.43	13.07	1007.1	1367.6	1161.8	1092.4	1141.1	1542	1211.7	1162	1127.8	1276.3	High	High	High	High	High	High	High	High	High	High	High		0		1.09529	0.397143
Q99N85	28S ribosomal protein S18a, mitochondrial OS=Mus musculus OX=10090 GN=Mrps18a PE=2 SV=1	22	5	16	5	1	196	22.3	10.18	55	26.77	4	5	0	991.96	1059.3	8.76	9.01	934.4	1041.2	1123.4	925.7	935.1	1188.4	1100.4	958	972.8	1076.9	High	High	High	High	High	High	High	High	High	High	High		0		1.06789	0.383926
Q99N84	28S ribosomal protein S18b, mitochondrial OS=Mus musculus OX=10090 GN=Mrps18b PE=1 SV=1	40	6	15	6	1	254	28.7	8.35	134	34.05	6	5	0	517.9	535.06	7.92	11.23	479.9	594.5	487.3	519.8	508	596.2	565.5	455.1	488.5	570	High	High	High	High	High	High	High	High	High	High	High	Oxidation [P228]	0		1.03313	0.605126
Q924T2	28S ribosomal protein S2, mitochondrial OS=Mus musculus OX=10090 GN=Mrps2 PE=1 SV=1	19	4	14	3	1	291	32.3	9.14	239	33.29	3	4	0	908.94	990.2	7.92	9.08	844.5	1015.9	897.8	959.2	827.3	1071.7	995.1	879.6	921.3	1083.3	High	High	High	High	High	High	High	High	High	High	High		0		1.0894	0.283827
P58059	28S ribosomal protein S21, mitochondrial OS=Mus musculus OX=10090 GN=Mrps21 PE=1 SV=1	15	1	6	1	1	87	10.6	10.32	108	12.6	1	1	0	340.56	373.62	8.79	7.93	325.4	398.4	329.4	336.7	312.9	422.5	370.8	341.6	366.4	366.8	High	High	High	High	High	High	High	High	High	High	High		0		1.09708	0.187343
Q9CXW2	28S ribosomal protein S22, mitochondrial OS=Mus musculus OX=10090 GN=Mrps22 PE=1 SV=1	34	12	42	12	1	359	41.2	8.56	365	88.39	12	12	0	3943.34	4120.74	5.29	4.22	3733.8	4266	4038.4	3958.2	3720.3	4186.7	4291.4	3916.7	3953.9	4255	High	High	High	High	High	High	High	High	High	High	High		0		1.04499	0.250513
Q8VE22	28S ribosomal protein S23, mitochondrial OS=Mus musculus OX=10090 GN=Mrps23 PE=1 SV=1	31	5	18	5	1	177	20.3	8.59	173	35.78	5	5	0	1021.04	1086.02	9.4	5.57	945.5	1202.3	1022.2	998	937.2	1153.6	1141.7	1020.1	1035.2	1079.5	High	High	High	High	High	High	High	High	High	High	High		0		1.06364	0.253295
Q9CQV5	28S ribosomal protein S24, mitochondrial OS=Mus musculus OX=10090 GN=Mrps24 PE=1 SV=1	12	2	6	2	1	167	18.9	9.76	45	9.85	2	2	0	302.16	330.14	10.38	10.68	279.6	352.9	282.6	319.3	276.4	380.3	333.2	292.7	300.8	343.7	High	High	High	High	High	High	High	High	High	High	High		0		1.0926	0.309691
Q9D125	28S ribosomal protein S25, mitochondrial OS=Mus musculus OX=10090 GN=Mrps25 PE=1 SV=1	30	6	14	6	1	171	19.9	9.23	62	17.26	5	6	0	1184.98	1316.44	6.85	9.35	1109.2	1338.7	1177	1171.2	1128.8	1411.6	1445.9	1201.2	1173.5	1350	High	High	High	High	High	High	High	High	High	High	High		0		1.11094	0.0840818
Q80ZS3	28S ribosomal protein S26, mitochondrial OS=Mus musculus OX=10090 GN=Mrps26 PE=1 SV=1	36	7	35	7	1	200	23.4	9.96	347	69.06	7	7	0	2373.12	2615.44	6.76	7.91	2151.7	2634	2324.5	2434.7	2320.7	2821.8	2780.7	2452.8	2348.2	2673.7	High	High	High	High	High	High	High	High	High	High	High		0		1.10211	0.130326
Q8BK72	28S ribosomal protein S27, mitochondrial OS=Mus musculus OX=10090 GN=Mrps27 PE=1 SV=2	40	13	44	13	1	415	47.7	5.5	402	96.82	12	13	0	2922.8	3107.32	9.06	7.67	2584.3	3383.2	2845.8	2982.1	2818.6	3385.1	3168.8	2822.4	2902.1	3258.2	High	High	High	High	High	High	High	High	High	High	High		0		1.06313	0.385033
Q9CY16	28S ribosomal protein S28, mitochondrial OS=Mus musculus OX=10090 GN=Mrps28 PE=1 SV=1	25	6	16	6	1	186	20.5	8.92	59	27.78	6	6	0	1219.78	1237.84	7.97	5.06	1105.6	1372	1159.4	1240.2	1221.7	1282.3	1284.3	1195.4	1148	1279.2	High	High	High	High	High	High	High	High	High	High	High		0		1.01481	0.73718
Q9ER88	28S ribosomal protein S29, mitochondrial OS=Mus musculus OX=10090 GN=Dap3 PE=1 SV=1	28	9	30	9	1	391	44.7	8.94	277	60.1	8	9	0	1525.92	1614.72	9.09	9.6	1377.6	1739.5	1454.8	1629.4	1428.3	1712.5	1696	1422.1	1475.4	1767.6	High	High	High	High	High	High	High	High	High	High	High		0		1.05819	0.43956
Q9D0G0	28S ribosomal protein S30, mitochondrial OS=Mus musculus OX=10090 GN=Mrps30 PE=1 SV=1	51	15	67	15	1	442	49.9	9.38	826	154.26	14	14	0	3219.98	3608.14	6.71	11.45	3088.2	3591.2	3300.7	3008.3	3111.5	4039	3943.3	3293.4	3079	3686	High	High	High	High	High	High	High	High	High	High	High	Oxidation [P187]	1	Oxidation [P187]	1.12055	0.0903063
Q61733	28S ribosomal protein S31, mitochondrial OS=Mus musculus OX=10090 GN=Mrps31 PE=1 SV=1	27	11	32	11	1	384	43.9	8.51	225	55.69	10	11	0	2150.4	2344.98	9.28	8.25	1957.7	2507.2	2094.7	2208.5	1983.9	2573.2	2453.4	2107.6	2184.7	2406	High	High	High	High	High	High	High	High	High	High	High		0		1.09049	0.226473
Q9D2R8	28S ribosomal protein S33, mitochondrial OS=Mus musculus OX=10090 GN=Mrps33 PE=1 SV=1	22	2	5	2	1	106	12.5	10.26	0	10.32	2	2	0	1105.14	1100.44	7.24	4.91	1066.4	1251.8	1053.7	1124.8	1029	1111.9	1176.8	1030.1	1109	1074.4	High	High	High	High	High	High	High	High	High	High	High		0		0.995747	0.847151
Q9JIK9	28S ribosomal protein S34, mitochondrial OS=Mus musculus OX=10090 GN=Mrps34 PE=1 SV=1	28	6	12	6	1	218	25.8	10.43	104	26.03	5	5	0	892.52	971.34	9.73	8.82	807.7	1052.6	892.3	885.9	824.1	1044.5	1032.3	902.2	856.9	1020.8	High	High	High	High	High	High	High	High	High	High	High		0		1.08831	0.239127
Q8BJZ4	28S ribosomal protein S35, mitochondrial OS=Mus musculus OX=10090 GN=Mrps35 PE=1 SV=2	31	9	20	9	1	320	36	8.59	141	42.6	9	9	0	1828.8	1888.74	14.66	9.25	1577.8	2192.4	1548.4	2007.8	1817.6	2077.7	1971.2	1705.4	1699.8	1989.6	High	High	High	High	High	High	High	High	High	High	High		0		1.03278	0.703623
Q9CQX8	28S ribosomal protein S36, mitochondrial OS=Mus musculus OX=10090 GN=Mrps36 PE=1 SV=1	47	4	181	4	1	102	11.1	9.99	1412	386.46	4	4	0	16915.9	17290.4	3.93	4.35	17272.7	17003.1	17760	15768.2	16775.4	17928	17220.8	16322.3	18136.1	16844.9	High	High	High	High	High	High	High	High	High	High	High	Oxidation [P87]	1	Oxidation [P87]	1.02214	0.572717
Q99N87	28S ribosomal protein S5, mitochondrial OS=Mus musculus OX=10090 GN=Mrps5 PE=1 SV=1	24	12	37	12	1	432	48.2	10.14	179	58.54	10	12	0	3311.16	3505.4	5.76	8.02	3397.9	3558.9	3161.1	3363.7	3074.2	3733.6	3762.3	3339.1	3101.7	3590.3	High	High	High	High	High	High	High	High	High	High	High		0		1.05866	0.206201
P58064	28S ribosomal protein S6, mitochondrial OS=Mus musculus OX=10090 GN=Mrps6 PE=1 SV=3	30	4	9	4	1	125	14.3	9.5	73	19.87	3	4	0	707.88	781.1	10.19	11.11	651.6	835.4	678.9	717.4	656.1	883.1	809.2	687.9	693.4	831.9	High	High	High	High	High	High	High	High	High	High	High		0		1.10344	0.249031
Q80X85	28S ribosomal protein S7, mitochondrial OS=Mus musculus OX=10090 GN=Mrps7 PE=1 SV=1	37	8	30	8	1	242	28	9.94	364	64.6	7	8	0	2246.06	2449.26	6.41	7.03	2133.7	2511.3	2250.7	2225.9	2108.7	2566.4	2519.1	2197	2350.9	2612.9	High	High	High	High	High	High	High	High	High	High	High		0		1.09047	0.145449
Q9D7N3	28S ribosomal protein S9, mitochondrial OS=Mus musculus OX=10090 GN=Mrps9 PE=1 SV=3	42	13	34	13	1	390	44.9	8.81	255	65.37	12	13	0	1669	1789.84	8.45	8.81	1515.8	1922.9	1648.7	1686.8	1570.8	2029.9	1848.9	1644.3	1660.7	1765.4	High	High	High	High	High	High	High	High	High	High	High		0		1.0724	0.327701
O88986	2-amino-3-ketobutyrate coenzyme A ligase, mitochondrial OS=Mus musculus OX=10090 GN=Gcat PE=1 SV=2	35	10	35	10	1	416	44.9	7.33	623	90.2	10	9	0	2076.72	2076.32	5.45	9.09	2224.9	1978.8	2123.1	1960.1	2096.7	1936	1861	2274.1	2266.7	2043.8	High	High	High	High	High	High	High	High	High	High	High		0		0.999807	0.99712
Q6PDY2	2-aminoethanethiol dioxygenase OS=Mus musculus OX=10090 GN=Ado PE=1 SV=2	61	11	30	11	1	256	28.4	5.97	369	68.5	10	11	0	1383.66	1463.86	3.54	6.68	1427.1	1350.4	1440.9	1335.4	1364.5	1579.7	1490.2	1420.3	1321.2	1507.9	High	High	High	High	High	High	High	High	High	High	High		0		1.05796	0.114878
Q8BH00	2-aminomuconic semialdehyde dehydrogenase OS=Mus musculus OX=10090 GN=Aldh8a1 PE=1 SV=1	2	1	1	1	1	487	53.6	7.55		0		1	0	#DIV/0!	#DIV/0!													High	High	High	High	High	High	High	High	High	High	High		0		#DIV/0!	#DIV/0!
Q9QXE0	2-hydroxyacyl-CoA lyase 1 OS=Mus musculus OX=10090 GN=Hacl1 PE=1 SV=2	6	3	8	3	1	581	63.6	6.27	59	15.21	3	3	0	643.66	689.64	4.95	9.8	666.4	616.7	692.7	623.7	618.8	695.8	602.4	782.4	715.2	652.4	High	High	High	High	High	High	High	High	High	High	High		0		1.07144	0.0836254
P52760	2-iminobutanoate/2-iminopropanoate deaminase OS=Mus musculus OX=10090 GN=Rida PE=1 SV=3	56	6	12	6	1	135	14.2	8.68	113	23.95	6	6	0	759.08	720.84	8.58	10.24	849.3	662.5	809.4	725.3	748.9	663.2	644.9	761.5	825.4	709.2	High	High	High	High	High	High	High	High	High	High	High		0		0.949623	0.448556
Q9CXI0	2-methoxy-6-polyprenyl-1,4-benzoquinol methylase, mitochondrial OS=Mus musculus OX=10090 GN=Coq5 PE=1 SV=2	62	16	101	16	1	327	37.3	7.49	1200	276.74	15	16	0	6741.04	6627.96	2.58	3.79	6487.5	6868.3	6880.9	6767	6701.5	6332.9	6708.8	6684.7	6974.1	6439.3	High	High	High	High	High	High	High	High	High	High	High		0		0.983225	0.241515
Q60597	2-oxoglutarate dehydrogenase, mitochondrial OS=Mus musculus OX=10090 GN=Ogdh PE=1 SV=3	63	64	2503	53	1	1023	116.4	6.83	27126	5730.67	60	63	15	206917	205661	2.17	3.2	207138	207465	211104	198534	210346	199411	212313	202669	213169	200744	High	High	High	High	High	High	High	High	High	High	High	Oxidation [P288; P310; P459; P461; P519; P524; P588; P590; P949]	9	Oxidation [P288; P310; P459; P461; P519; P524; P588; P590; P949]	0.993929	0.804828
Q6IYF8	2-oxoglutarate receptor 1 OS=Mus musculus OX=10090 GN=Oxgr1 PE=2 SV=1	3	1	4	1	1	337	38.2	8.25	0	5.21	1	1	0	380.08	395.06	22.1	14.85	349.4	329.5	336.6	514.6	370.3	402.9	306.9	471.7	392.1	401.7	Medium	Medium	Medium	Medium	Medium	Medium	Medium	Medium	Medium	Medium	Medium		0		1.03941	0.743519
Q3U3J1	2-oxoisovalerate dehydrogenase subunit alpha OS=Mus musculus OX=10090 GN=Bckdha PE=1 SV=1	65	22	89	22	1	446	50.7	8.06		384.03		22	0	14536.9	13225.2	5.75	8.69	14038.9	15943.7	13645.4	14995.9	14060.8	12302	13000	13161.8	15180.2	12482.1	High	High	High	High	High	High	High	High	High	High	High		0		0.909766	0.072168
Q6P3A8	2-oxoisovalerate dehydrogenase subunit beta, mitochondrial OS=Mus musculus OX=10090 GN=Bckdhb PE=1 SV=2	45	15	104	15	1	390	42.9	6.7	1084	220.09	14	15	0	9898.08	8757.4	6.5	7.79	9822.5	10700.1	8979.7	10376.2	9611.9	8269.9	8680.2	8909.6	9831.9	8095.4	High	High	High	High	High	High	High	High	High	High	High		0		0.884757	0.0337808
A0A1B0GRV0	3'(2'),5'-bisphosphate nucleotidase 1 OS=Mus musculus OX=10090 GN=Bpnt1 PE=1 SV=1	49	13	32	2	1	323	35	5.82		133		13	12	6597.42	6424.56	2.25	4.45	6573.3	6398.7	6727.5	6505.1	6782.5	5974.8	6415.9	6752.8	6552.7	6426.6	High	High	High	High	High	High	High	High	High	High	High		0		0.973799	0.254773
Q9Z0S1	3'(2'),5'-bisphosphate nucleotidase 1 OS=Mus musculus OX=10090 GN=Bpnt1 PE=1 SV=2	47	12	54	1	1	308	33.2	5.82	527	116.25	12	12	0	58.98	59.28	8.6	6.32	61.8	56.5	67	52.9	56.7	57.8	60.3	59.8	54.1	64.4	High	High	High	High	High	High	High	High	High	High	High		0		1.00509	0.915946
Q99N96	39S ribosomal protein L1, mitochondrial OS=Mus musculus OX=10090 GN=Mrpl1 PE=1 SV=2	38	12	52	11	1	336	37.6	8.72	450	101.7	12	12	0	4102.46	4639.06	7.15	13.52	3999.5	4593.6	4043.8	3956	3919.4	5280.1	5144.1	4132.4	3847.1	4791.6	High	High	High	High	High	High	High	High	High	High	High		0		1.1308	0.101569
Q3TBW2	39S ribosomal protein L10, mitochondrial OS=Mus musculus OX=10090 GN=Mrpl10 PE=1 SV=2	45	9	38	9	1	262	29.4	9.69	515	86.9	8	9	0	1522.94	1686.66	6.38	11.96	1391.1	1576.8	1534.1	1453.2	1659.5	1817.9	1826.1	1512.8	1424.7	1851.8	High	High	High	High	High	High	High	High	High	High	High	Oxidation [P175]	1	Oxidation [P175]	1.1075	0.13027
Q9CQF0	39S ribosomal protein L11, mitochondrial OS=Mus musculus OX=10090 GN=Mrpl11 PE=1 SV=1	64	12	51	12	1	192	20.7	9.73	364	97.42	11	12	0	5790	6196.3	4.8	10.94	5736.7	6074.3	5761.6	5517.1	5860.3	6768.7	6797.2	5703	5275.5	6437.1	High	High	High	High	High	High	High	High	High	High	High		0		1.07017	0.166397
Q9DB15	39S ribosomal protein L12, mitochondrial OS=Mus musculus OX=10090 GN=Mrpl12 PE=1 SV=2	47	8	103	8	1	201	21.7	9.29	1188	252.78	7	8	0	6002.98	6394	3.21	10.73	5969.1	6233.2	6211.4	5747.6	5853.6	6916.9	7086.6	5745.2	5587.4	6633.9	High	High	High	High	High	High	High	High	High	High	High	Oxidation [P100]	0		1.06514	0.252583
Q9D1P0	39S ribosomal protein L13, mitochondrial OS=Mus musculus OX=10090 GN=Mrpl13 PE=1 SV=1	37	6	29	6	1	178	20.7	9.35	366	71.39	5	6	0	1634.8	1743.44	7.89	8.85	1545.5	1850	1661.6	1609	1507.9	1926	1806.7	1578.1	1586.2	1820.2	High	High	High	High	High	High	High	High	High	High	High		0		1.06645	0.330426
Q9D1I6	39S ribosomal protein L14, mitochondrial OS=Mus musculus OX=10090 GN=Mrpl14 PE=1 SV=1	30	4	16	4	1	145	15.9	10.99	185	34.52	4	4	0	909.62	886.02	8.96	8.94	860.7	999.9	863.2	935.1	889.2	1002.5	933.5	842.6	817.8	833.7	High	High	High	High	High	High	High	High	High	High	High		0		0.974055	0.621343
Q9CPR5	39S ribosomal protein L15, mitochondrial OS=Mus musculus OX=10090 GN=Mrpl15 PE=1 SV=1	34	10	35	10	1	295	33.5	10.07	411	75.16	10	10	0	2054.82	2219.32	5.36	12.28	1979	2248.3	2014.5	2001.2	2031.1	2465.2	2482.4	2009.3	1871.8	2267.9	High	High	High	High	High	High	High	High	High	High	High		0		1.08006	0.198825
Q99N93	39S ribosomal protein L16, mitochondrial OS=Mus musculus OX=10090 GN=Mrpl16 PE=1 SV=1	24	6	19	6	1	251	28.8	10.27	210	35.22	5	6	0	1307	1470.18	3.66	11.99	1260.8	1355.7	1374.2	1272.8	1271.5	1636.2	1600.3	1338.1	1231.9	1544.4	High	High	High	High	High	High	High	High	High	High	High		0		1.12485	0.127857
Q9D8P4	39S ribosomal protein L17, mitochondrial OS=Mus musculus OX=10090 GN=Mrpl17 PE=1 SV=1	33	7	18	7	1	176	20.2	9.82	88	27.17	7	7	0	574.6	618.02	13.82	9.98	539.1	711.3	582.1	561.9	478.6	663.9	688.9	567.2	544.2	625.9	High	High	High	High	High	High	High	High	High	High	High		0		1.07557	0.31696
Q9CQL5	39S ribosomal protein L18, mitochondrial OS=Mus musculus OX=10090 GN=Mrpl18 PE=1 SV=1	24	4	12	4	1	180	20.7	9.28	102	18.9	3	4	0	1047.06	1138.08	2.64	9.35	1029.6	1098.9	1038.8	1021.4	1046.6	1191.6	1162.9	1025.9	1035.2	1274.8	High	High	High	High	High	High	High	High	High	High	High		0		1.08693	0.115879
Q9D338	39S ribosomal protein L19, mitochondrial OS=Mus musculus OX=10090 GN=Mrpl19 PE=1 SV=1	38	10	36	10	1	292	33.6	9.44	236	68.97	10	10	0	1287.58	1467.38	6.08	13.97	1212	1423	1292.8	1227.1	1283	1710.1	1596	1319.9	1204	1506.9	High	High	High	High	High	High	High	High	High	High	High		0		1.13964	0.121138
Q9D773	39S ribosomal protein L2, mitochondrial OS=Mus musculus OX=10090 GN=Mrpl2 PE=1 SV=1	34	11	36	11	1	306	33.3	11.06	261	78.07	9	11	0	2628.5	2835.06	5.32	11.36	2473.3	2825	2612.1	2570.5	2661.6	3143.1	3115.9	2534.7	2456.9	2924.7	High	High	High	High	High	High	High	High	High	High	High		0		1.07858	0.221671
Q9CQL4	39S ribosomal protein L20, mitochondrial OS=Mus musculus OX=10090 GN=Mrpl20 PE=1 SV=1	38	6	16	6	1	149	17.6	11.11	82	39.34	6	6	0	1006.94	1162.44	5.31	13.1	1023.7	1098.1	1002.1	949.4	961.4	1318.3	1283.2	1055.9	959	1195.8	High	High	High	High	High	High	High	High	High	High	High		0		1.15443	0.0447614
Q9D1N9	39S ribosomal protein L21, mitochondrial OS=Mus musculus OX=10090 GN=Mrpl21 PE=1 SV=1	36	6	25	6	1	209	23.4	9.99	164	45.07	6	6	0	2090.54	2273.16	6.23	10.7	1998	2292.9	2119.1	2053.6	1989.1	2516.2	2509.5	2121.2	1959.5	2259.4	High	High	High	High	High	High	High	High	High	High	High		0		1.08736	0.164228
Q8BU88	39S ribosomal protein L22, mitochondrial OS=Mus musculus OX=10090 GN=Mrpl22 PE=1 SV=1	36	8	40	8	1	206	23.8	9.86	105	70.94	8	8	0	5084.26	5452.98	6.15	7.74	4675	5620.1	4995	5162.7	4968.5	5529.8	5554.2	4978.5	5138.5	6063.9	High	High	High	High	High	High	High	High	High	High	High		0		1.07252	0.215164
O35972	39S ribosomal protein L23, mitochondrial OS=Mus musculus OX=10090 GN=Mrpl23 PE=1 SV=1	19	2	8	2	1	146	17.1	9.76	144	22.01	2	2	0	631.86	689.6	4.94	9.4	601.8	688.8	638.9	616.3	613.5	743.4	754.1	651	599.3	700.2	High	High	High	High	High	High	High	High	High	High	High		0		1.09138	0.107523
Q9CQ06	39S ribosomal protein L24, mitochondrial OS=Mus musculus OX=10090 GN=Mrpl24 PE=1 SV=1	37	8	29	8	1	216	24.9	9.5	216	52.47	8	8	0	2924.18	3283.44	5.06	13.66	2828.7	3174.3	2927	2878.5	2812.4	3702.7	3680.7	2972.6	2679.9	3381.3	High	High	High	High	High	High	High	High	High	High	High		0		1.12286	0.135219
Q99N92	39S ribosomal protein L27, mitochondrial OS=Mus musculus OX=10090 GN=Mrpl27 PE=1 SV=1	47	6	14	6	1	148	15.9	10.17	120	25.26	4	6	0	1231.06	1378.9	6.31	10.93	1198.1	1373.1	1239	1183.6	1161.5	1525	1493.8	1246.5	1191	1438.2	High	High	High	High	High	High	High	High	High	High	High		0		1.12009	0.090771
Q9D1B9	39S ribosomal protein L28, mitochondrial OS=Mus musculus OX=10090 GN=Mrpl28 PE=1 SV=3	23	7	30	7	1	257	30.2	9.29	97	50.04	7	7	0	3798.32	4251.82	6.23	13.2	3644.4	4195.7	3692.1	3707.6	3751.8	4752	4829.9	3867.3	3526.2	4283.7	High	High	High	High	High	High	High	High	High	High	High		0		1.11939	0.105559
Q99N95	39S ribosomal protein L3, mitochondrial OS=Mus musculus OX=10090 GN=Mrpl3 PE=1 SV=1	27	9	23	9	1	348	39.1	9.55	158	49.9	8	9	0	2846.28	3174.66	6.28	13.76	2722.4	3139.1	2876	2717.7	2776.2	3542.1	3619	2859.2	2603.9	3249.1	High	High	High	High	High	High	High	High	High	High	High		0		1.11537	0.130835
Q9D7N6	39S ribosomal protein L30, mitochondrial OS=Mus musculus OX=10090 GN=Mrpl30 PE=1 SV=1	41	5	11	5	1	160	18.3	10.15	73	25.03	5	5	0	1027.64	1127.46	6.98	11.36	1000.4	1143.4	1051.3	991.6	951.5	1230.1	1255.6	1032.1	958.7	1160.8	High	High	High	High	High	High	High	High	High	High	High		0		1.09714	0.144446
Q9DCI9	39S ribosomal protein L32, mitochondrial OS=Mus musculus OX=10090 GN=Mrpl32 PE=1 SV=1	32	5	12	5	1	187	21.7	9.7	91	26.3	4	5	0	1145.16	1313.56	7.22	17.95	1086	1220.1	1235.7	1084.7	1099.3	1587.5	1515.7	1139.8	1038.6	1286.2	High	High	High	High	High	High	High	High	High	High	High		0		1.14705	0.201547
Q9CQP0	39S ribosomal protein L33, mitochondrial OS=Mus musculus OX=10090 GN=Mrpl33 PE=1 SV=1	11	1	2	1	1	65	7.4	10.89	27	2.98	1	1	0	392.92	435.42	4.37	16.51	394.6	419.7	381.8	392.6	375.9	511.7	494.2	376	347.6	447.6	High	High	High	High	High	High	High	High	High	High	High		0		1.10816	0.223391
Q99N91	39S ribosomal protein L34, mitochondrial OS=Mus musculus OX=10090 GN=Mrpl34 PE=1 SV=1	24	2	5	2	1	92	10.5	11.81	60	10.28	1	2	0	384.02	454.42	7.95	19.9	357.8	430.3	366.3	379.3	386.4	545.6	528.6	386.7	336.5	474.7	High	High	High	High	High	High	High	High	High	High	High		0		1.18332	0.144242
Q9CQL6	39S ribosomal protein L35, mitochondrial OS=Mus musculus OX=10090 GN=Mrpl35 PE=2 SV=1	4	1	2	1	1	188	21.5	11.47	0	2.8	1	1	0	304.9	328.98	6.55	9.38	300.9	336	277.7	309.4	300.5	351.5	354.8	319.3	279.7	339.6	High	High	High	High	High	High	High	High	High	High	High		0		1.07898	0.170152
Q921S7	39S ribosomal protein L37, mitochondrial OS=Mus musculus OX=10090 GN=Mrpl37 PE=1 SV=1	53	19	81	19	1	423	48.3	8.84	740	171.6	18	19	0	4807.14	5413.72	6.64	11.05	4644.4	5382.9	4803	4671	4534.4	5863.1	5700.4	4851.8	4688	5965.3	High	High	High	High	High	High	High	High	High	High	High		0		1.12618	0.112993
Q8K2M0	39S ribosomal protein L38, mitochondrial OS=Mus musculus OX=10090 GN=Mrpl38 PE=1 SV=2	31	10	46	10	1	380	45	8.1	222	76.61	10	10	0	2242.4	2430.5	3.12	6.4	2187.5	2323.8	2318.2	2191	2191.5	2525.2	2499.5	2321.2	2216.5	2590.1	High	High	High	High	High	High	High	High	High	High	High		0		1.08388	0.0780503
Q9JKF7	39S ribosomal protein L39, mitochondrial OS=Mus musculus OX=10090 GN=Mrpl39 PE=1 SV=4	33	12	32	12	1	336	38.5	7.94	347	57.34	12	11	0	1700.34	1805.08	5.38	9.54	1578.4	1802.2	1747.8	1712	1661.3	1992.4	1949.5	1713.9	1571.9	1797.7	High	High	High	High	High	High	High	High	High	High	High		0		1.0616	0.328687
Q9DCU6	39S ribosomal protein L4, mitochondrial OS=Mus musculus OX=10090 GN=Mrpl4 PE=1 SV=1	26	8	23	8	1	294	33.1	9.82	159	42.22	7	8	0	1705.04	1901.24	6.45	11.21	1653.1	1899.4	1700.7	1611.5	1660.5	2074.5	2043.8	1703.8	1635.5	2048.6	High	High	High	High	High	High	High	High	High	High	High		0		1.11507	0.0912918
Q9Z2Q5	39S ribosomal protein L40, mitochondrial OS=Mus musculus OX=10090 GN=Mrpl40 PE=1 SV=2	39	7	28	7	1	206	24.3	9.47	245	59.06	6	7	0	2434.88	2678.22	6.36	15.71	2474.4	2682.4	2342.2	2367.2	2308.2	3110	3005.4	2362.4	2127.7	2785.6	High	High	High	High	High	High	High	High	High	High	High	Oxidation [P44; P49]	0		1.09994	0.197882
Q9CQN7	39S ribosomal protein L41, mitochondrial OS=Mus musculus OX=10090 GN=Mrpl41 PE=1 SV=1	51	6	24	6	1	135	15.3	9.82	329	53.62	6	6	0	1741.7	1784.34	7.86	14.62	1625.8	1896.9	1644.7	1766.6	1774.5	2020.1	1985.6	1557.3	1452.8	1905.9	High	High	High	High	High	High	High	High	High	High	High		0		1.02448	0.735727
Q9CPV3	39S ribosomal protein L42, mitochondrial OS=Mus musculus OX=10090 GN=Mrpl42 PE=1 SV=1	25	2	4	2	1	142	16.5	9.19	54	10.8	2	2	0	152.26	193.84	13.34	8.63	139.5	164.9	173.7	136	147.2	177.9	190.2	178.4	210.5	212.2	High	High	High	High	High	High	High	High	High	High	High		0		1.27309	0.0312853
Q99N89	39S ribosomal protein L43, mitochondrial OS=Mus musculus OX=10090 GN=Mrpl43 PE=1 SV=1	20	4	21	4	1	183	20.2	9.52	140	31.55	4	4	0	1186.46	1327.54	7.07	14.8	1150.2	1333.1	1162.6	1158.7	1127.7	1523.8	1492.2	1179.7	1072.3	1369.7	High	High	High	High	High	High	High	High	High	High	High		0		1.11891	0.157096
Q9CY73	39S ribosomal protein L44, mitochondrial OS=Mus musculus OX=10090 GN=Mrpl44 PE=1 SV=3	35	12	37	12	1	333	37.5	8.51	377	73.44	12	10	0	2621.88	2850.14	5.03	7.89	2428	2814.4	2605.1	2637.9	2624	2956.2	3073.8	2660.7	2561.5	2998.5	High	High	High	High	High	High	High	High	High	High	High		0		1.08706	0.102954
Q9D0Q7	39S ribosomal protein L45, mitochondrial OS=Mus musculus OX=10090 GN=Mrpl45 PE=1 SV=1	51	13	36	13	1	306	35.4	9.23	161	69.94	13	13	0	3124.4	3446.74	6.15	12.9	3035.7	3453.3	3012.7	3063.1	3057.2	3813.2	3813.3	3114.9	2838.8	3653.5	High	High	High	High	High	High	High	High	High	High	High		0		1.10317	0.143734
Q9EQI8	39S ribosomal protein L46, mitochondrial OS=Mus musculus OX=10090 GN=Mrpl46 PE=1 SV=1	27	7	37	7	1	283	32.1	7.4	346	60.21	7	7	0	1823.66	2049.64	6.3	14.1	1774.4	2039.1	1779	1722.5	1803.3	2276.3	2281.3	1814.4	1665.4	2210.8	High	High	High	High	High	High	High	High	High	High	High		0		1.12392	0.100571
Q8K2Y7	39S ribosomal protein L47, mitochondrial OS=Mus musculus OX=10090 GN=Mrpl47 PE=1 SV=2	15	4	22	4	1	252	29.7	10.21	172	39.36	4	4	0	2260.32	2571.36	6.58	11.41	2175.5	2532.4	2252.1	2214.6	2127	2894.7	2713.7	2298	2223.7	2726.7	High	High	High	High	High	High	High	High	High	High	High		0		1.13761	0.100696
Q8JZS9	39S ribosomal protein L48, mitochondrial OS=Mus musculus OX=10090 GN=Mrpl48 PE=1 SV=1	17	4	14	4	1	211	23.9	9.44	59	26.78	4	4	0	518.62	559.52	5.52	11.51	503	561.4	492.6	520	516.1	617.5	623.9	503.2	483.3	569.7	High	High	High	High	High	High	High	High	High	High	High		0		1.07886	0.183725
Q9CQ40	39S ribosomal protein L49, mitochondrial OS=Mus musculus OX=10090 GN=Mrpl49 PE=1 SV=1	34	5	26	5	1	166	19.1	9.5	254	54.21	5	5	0	2175.4	2338.9	5.5	16.1	2160.8	2386.2	2170.8	2044.3	2114.9	2556.2	2720.5	2218.8	1749.3	2449.7	High	High	High	High	High	High	High	High	High	High	High		0		1.07516	0.275617
Q8VDT9	39S ribosomal protein L50, mitochondrial OS=Mus musculus OX=10090 GN=Mrpl50 PE=1 SV=2	69	10	37	10	1	159	18.2	9.33	267	77.33	9	10	0	2061.32	2261.22	8.31	11.71	2022.3	2342	2120	1908.9	1913.4	2585.7	2447.5	2097.2	1924.5	2251.2	High	High	High	High	High	High	High	High	High	High	High		0		1.09698	0.144343
Q9CPY1	39S ribosomal protein L51, mitochondrial OS=Mus musculus OX=10090 GN=Mrpl51 PE=1 SV=1	14	2	6	2	1	128	15.1	11	57	9.6	2	2	0	178.24	195.88	7	11.2	164.7	198.7	179.5	182.5	165.8	208.9	213.6	174.7	169.3	212.9	High	High	High	High	High	High	High	High	High	High	High		0		1.09897	0.225448
Q9D0Y8	39S ribosomal protein L52, mitochondrial OS=Mus musculus OX=10090 GN=Mrpl52 PE=1 SV=1	19	2	5	2	1	121	13.6	10.93	54	11.05	2	2	0	996	1108.28	7.44	13.66	917.4	1115.9	977.5	1008.9	960.3	1255.1	1245.2	960.7	939.5	1140.9	High	High	High	High	High	High	High	High	High	High	High		0		1.11273	0.196916
Q9D1H8	39S ribosomal protein L53, mitochondrial OS=Mus musculus OX=10090 GN=Mrpl53 PE=1 SV=1	51	5	15	5	1	118	12.7	9.52	188	32.46	5	5	0	1247.16	1364.9	8.94	13.35	1178.2	1443.8	1224.3	1218	1171.5	1570.1	1518.6	1243.6	1136.3	1355.9	High	High	High	High	High	High	High	High	High	High	High		0		1.09441	0.219296
Q9CPW3	39S ribosomal protein L54, mitochondrial OS=Mus musculus OX=10090 GN=Mrpl54 PE=1 SV=1	13	2	3	2	1	135	15.4	10.04	32	5.31	1	2	0	720.54	669.66	9.43	10.39	675.4	771.2	662.2	749.8	744.1	748.8	722.7	649.4	571.1	656.3	High	High	High	High	High	High	High	High	High	High	High		0		0.929386	0.288376
Q9CZ83	39S ribosomal protein L55, mitochondrial OS=Mus musculus OX=10090 GN=Mrpl55 PE=1 SV=1	36	4	17	4	1	127	15.1	10.51	197	39.71	4	4	0	661.62	688.38	6.36	3.41	637	656.4	716.2	606.3	692.2	695.5	658	674.1	719.8	694.5	High	High	High	High	High	High	High	High	High	High	High		0		1.04045	0.376616
Q99N94	39S ribosomal protein L9, mitochondrial OS=Mus musculus OX=10090 GN=Mrpl9 PE=1 SV=2	29	7	24	7	1	265	30.2	10.08	195	46.61	6	7	0	1741.66	1878.92	8.95	9.67	1553.9	1996.6	1804.9	1670.4	1682.5	2156.8	1946.9	1758.1	1694.4	1838.4	High	High	High	High	High	High	High	High	High	High	High		0		1.07881	0.324313
Q91WT7	3-alpha-hydroxysteroid dehydrogenase type 1 OS=Mus musculus OX=10090 GN=Akr1c14 PE=1 SV=1	15	4	4	4	1	323	37.2	7.2		13.02		4	0	648.1	705.24	6.02	9.06	702.5	613.4	668.5	626.2	629.9	679.2	634.7	676	737.3	799	High	High	High	High	High	High	High	High	High	High	High		0		1.08817	0.185928
P70245	3-beta-hydroxysteroid-Delta(8),Delta(7)-isomerase OS=Mus musculus OX=10090 GN=Ebp PE=1 SV=3	4	1	2	1	1	230	26.2	7.56	0	2.5	1	1	0	445.18	445.42	6.58	4.35	457.4	392.1	481.4	447.5	447.5	440	469.3	430.5	425.3	462	High	High	High	High	High	High	High	High	High	High	High		0		1.00054	0.991766
A2AFQ2	3-hydroxyacyl-CoA dehydrogenase type-2 OS=Mus musculus OX=10090 GN=Hsd17b10 PE=1 SV=1	71	14	149	14	1	271	28.4	8.76		743.05		14	0	21215.8	21631.8	6.9	4.73	20181	22209.1	19100.4	21991.2	22597.3	21109.1	21815.7	22990.6	20252.5	21991.1	High	High	High	High	High	High	High	High	High	High	High		0		1.01961	0.689011
Q99L13	3-hydroxyisobutyrate dehydrogenase, mitochondrial OS=Mus musculus OX=10090 GN=Hibadh PE=1 SV=1	43	12	153	12	1	335	35.4	8.13	2052	356.8	12	12	0	13391.5	14055.7	5.81	5.26	13299.5	13876	12719.1	14446.7	12616.4	14228.9	14661	12918.4	14701.5	13768.7	High	High	High	High	High	High	High	High	High	High	High	Oxidation [P52; P103]	2	Oxidation [P52; P103]	1.0496	0.0241717
Q8QZS1	3-hydroxyisobutyryl-CoA hydrolase, mitochondrial OS=Mus musculus OX=10090 GN=Hibch PE=1 SV=1	62	22	370	22	1	385	43	8.06	3450	735.54	21	22	0	39416.8	38945.5	3.45	4.55	40313.3	37771.4	39131.4	38340.5	41527.4	37675.9	38073.2	41304	40353.2	37321.3	High	High	High	High	High	High	High	High	High	High	High		0		0.988044	0.729948
Q921H8	3-ketoacyl-CoA thiolase A, peroxisomal OS=Mus musculus OX=10090 GN=Acaa1a PE=1 SV=1	54	17	125	8	1	424	43.9	8.44	1653	345.21	17	17	10	8164.42	7707.06	6.46	10.2	7643.6	8614.2	8552.5	8433.5	7578.3	7518.8	7408.1	8159.6	8759.5	6689.3	High	High	High	High	High	High	High	High	High	High	High	Oxidation [P314]	0		0.943981	0.167477
Q8VCH0	3-ketoacyl-CoA thiolase B, peroxisomal OS=Mus musculus OX=10090 GN=Acaa1b PE=1 SV=1	41	11	80	2	1	424	44	8.51	1059	206.59	9	11	0	959.72	940.7	3.82	4.3	920.8	922.8	992.8	957.1	1005.1	932.7	985.3	975.3	885.8	924.4	High	High	High	High	High	High	High	High	High	High	High	Oxidation [P314]	1	Oxidation [P314]	0.980182	0.513965
Q8BWT1	3-ketoacyl-CoA thiolase, mitochondrial OS=Mus musculus OX=10090 GN=Acaa2 PE=1 SV=3	91	34	2185	34	1	397	41.8	8.09	37497	5798.14	34	33	0	163420	144043	5.29	8.73	157618	158738	157168	179284	164294	134352	145790	139736	165029	135310	High	High	High	High	High	High	High	High	High	High	High	Oxidation [P48; P160; P205; P225; P289; P296]	0		0.881428	0.00292137
Q6GV12	3-ketodihydrosphingosine reductase OS=Mus musculus OX=10090 GN=Kdsr PE=1 SV=1	6	2	3	2	1	332	35.9	7.9	28	6.04	1	2	0	315.36	340.9	2.77	6.32	328.6	312	321.4	303.8	311	353.3	352.7	308	330.3	360.2	High	High	High	High	High	High	High	High	High	High	High		0		1.08099	0.0761791
O88736	3-keto-steroid reductase OS=Mus musculus OX=10090 GN=Hsd17b7 PE=1 SV=1	21	6	13	6	1	334	37.3	6.73	78	25.42	6	5	0	996.02	1073.02	5.81	10.58	1009.1	1000.6	1093.3	954.3	922.8	1184.9	1136.3	1015.3	903	1125.6	High	High	High	High	High	High	High	High	High	High	High		0		1.07731	0.261582
Q99J99	3-mercaptopyruvate sulfurtransferase OS=Mus musculus OX=10090 GN=Mpst PE=1 SV=4	37	8	42	8	1	297	33.1	6.47	481	99.15	8	8	0	2430.82	2347.9	8.91	10.08	2275.1	2749.1	2198.1	2593.1	2338.7	2141.1	2374.2	2127.6	2709.3	2387.3	High	High	High	High	High	High	High	High	High	High	High		0		0.965888	0.385221
Q9D404	3-oxoacyl-[acyl-carrier-protein] synthase, mitochondrial OS=Mus musculus OX=10090 GN=Oxsm PE=1 SV=1	30	10	34	10	1	459	48.6	7.06	450	88.99	8	10	0	2806.84	2874.86	2.71	4.72	2703.9	2889.1	2820	2742.8	2878.4	2888.3	2712.6	2937.2	3058.6	2777.6	High	High	High	High	High	High	High	High	High	High	High		0		1.02423	0.496359
P63325	40S ribosomal protein S10 OS=Mus musculus OX=10090 GN=Rps10 PE=1 SV=1	41	7	29	6	1	165	18.9	10.15	158	46.56	7	7	0	1323.72	1545.46	6.96	16.03	1230.3	1377.6	1331	1410.5	1269.2	1733.3	1837.7	1432.8	1212.2	1511.3	High	High	High	High	High	High	High	High	High	High	High		0		1.16751	0.157992
P62281	40S ribosomal protein S11 OS=Mus musculus OX=10090 GN=Rps11 PE=1 SV=3	44	8	28	8	1	158	18.4	10.3	158	49.45	8	8	0	2459.22	2902.26	7.68	15.32	2177.5	2657.5	2472.5	2628.2	2360.4	3169.7	3472.8	2728.5	2302.9	2837.4	High	High	High	High	High	High	High	High	High	High	High		0		1.18015	0.1275
A0A1W2P7A1	40S ribosomal protein S12 OS=Mus musculus OX=10090 GN=Rps12 PE=1 SV=1	41	5	10	5	1	148	16	8.16		42.03		5	0	2354.94	2421.84	4.66	11.93	2281.3	2483.5	2342	2332.6	2335.3	2770.2	2628.7	2223.1	2061	2426.2	High	High	High	High	High	High	High	High	High	High	High		0		1.02841	0.631937
P62301	40S ribosomal protein S13 OS=Mus musculus OX=10090 GN=Rps13 PE=1 SV=2	52	8	28	8	1	151	17.2	10.54	182	55.96	6	8	0	2564.02	3069.34	8.75	17.43	2283.2	2769.9	2548.8	2783.1	2435.1	3371.9	3745.3	2895.2	2319	3015.3	High	High	High	High	High	High	High	High	High	High	High		0		1.19708	0.141913
P62264	40S ribosomal protein S14 OS=Mus musculus OX=10090 GN=Rps14 PE=1 SV=3	36	5	30	5	1	151	16.3	10.05	368	80.34	5	5	0	2147.26	2575.8	8.76	19.07	1907.4	2250	2173.2	2330.1	2075.6	2909.1	3187.5	2386.5	1916	2479.9	High	High	High	High	High	High	High	High	High	High	High		0		1.19958	0.173712
P62843	40S ribosomal protein S15 OS=Mus musculus OX=10090 GN=Rps15 PE=1 SV=2	31	6	14	5	1	145	17	10.39	16	21.67	5	5	0	765.94	858	3.91	12.28	720.8	768.5	810.2	768.2	762	881.2	1016.6	843.5	726.7	822	High	High	High	High	High	High	High	High	High	High	High		0		1.12019	0.143367
P62245	40S ribosomal protein S15a OS=Mus musculus OX=10090 GN=Rps15a PE=1 SV=2	41	6	22	6	1	130	14.8	10.13	90	35.02	6	6	0	1810.8	2169.46	5.69	16.84	1644	1848.2	1838.2	1946.5	1777.1	2380	2596.8	2123.7	1619.1	2127.7	High	High	High	High	High	High	High	High	High	High	High		0		1.19807	0.141676
P14131	40S ribosomal protein S16 OS=Mus musculus OX=10090 GN=Rps16 PE=1 SV=4	68	13	39	13	1	146	16.4	10.21	182	67.47	10	12	0	4357.64	5400.34	9.48	22.95	3864	4603.3	4345.4	4806.3	4169.2	6355	6928.3	5047.2	3831.8	4839.4	High	High	High	High	High	High	High	High	High	High	High		0		1.23928	0.175955
P63276	40S ribosomal protein S17 OS=Mus musculus OX=10090 GN=Rps17 PE=1 SV=2	48	5	27	5	1	135	15.5	9.85	347	61.26	5	5	0	1809.68	2033	11.33	19.66	1565.4	1839.5	1759.9	2077.2	1806.4	2333.6	2495.3	1982	1478.3	1875.8	High	High	High	High	High	High	High	High	High	High	High	Oxidation [P100]	1	Oxidation [P100]	1.1234	0.410579
P62270	40S ribosomal protein S18 OS=Mus musculus OX=10090 GN=Rps18 PE=1 SV=3	46	9	40	9	1	152	17.7	10.99	294	74.48	9	9	0	5398.18	6168.72	11.02	19.7	4759.7	5645.4	5214.1	6110.3	5261.4	7043	7661.1	5829.5	4545.5	5764.5	High	High	High	High	High	High	High	High	High	High	High		0		1.14274	0.323659
Q9CZX8	40S ribosomal protein S19 OS=Mus musculus OX=10090 GN=Rps19 PE=1 SV=3	52	9	47	9	1	145	16.1	10.4	436	89.83	9	9	0	4854.3	6062.24	8.46	22.95	4347.2	5038	4804.7	5382.9	4698.7	6999.7	7812.1	5570.4	4207	5722	High	High	High	High	High	High	High	High	High	High	High		0		1.24884	0.170053
P25444	40S ribosomal protein S2 OS=Mus musculus OX=10090 GN=Rps2 PE=1 SV=3	54	15	60	15	1	293	31.2	10.24	531	113.81	13	15	0	5233.64	6359.06	8.67	18.43	4579.7	5548.4	5284.8	5727	5028.3	7236.7	7777.7	5954.4	4796.3	6030.2	High	High	High	High	High	High	High	High	High	High	High		0		1.21504	0.150071
P60867	40S ribosomal protein S20 OS=Mus musculus OX=10090 GN=Rps20 PE=1 SV=1	32	4	19	4	1	119	13.4	9.94	139	34.51	4	4	0	771.8	879.42	5.07	9.26	749.5	786.2	757.8	821.7	743.8	922.1	984.2	874.1	766	850.7	High	High	High	High	High	High	High	High	High	High	High		0		1.13944	0.0717681
Q9CQR2	40S ribosomal protein S21 OS=Mus musculus OX=10090 GN=Rps21 PE=1 SV=1	31	3	13	3	1	83	9.1	8.51	62	18.41	3	3	0	1937.58	2173.06	7.99	20.57	1777.7	1966.7	1929.9	2135.2	1878.4	2629.4	2630	2006.2	1605.1	1994.6	High	High	High	High	High	High	High	High	High	High	High		0		1.12153	0.388743
P62267	40S ribosomal protein S23 OS=Mus musculus OX=10090 GN=Rps23 PE=1 SV=3	31	6	17	5	1	143	15.8	10.49	85	32.76	5	6	0	1767.54	1949.84	3.24	11.35	1754.9	1783.8	1747.4	1826	1725.6	2086.4	2221.3	1902.4	1635	1904.1	High	High	High	High	High	High	High	High	High	High	High	Oxidation [P62]	1	Oxidation [P62]	1.10314	0.16258
P62849	40S ribosomal protein S24 OS=Mus musculus OX=10090 GN=Rps24 PE=1 SV=1	35	5	28	5	1	133	15.4	10.78	27	40.91	5	5	0	2048.74	2233.94	9.15	14.55	1889.7	2018	1952.9	2326	2057.1	2418.8	2654.1	2188.9	1791.1	2116.8	High	High	High	High	High	High	High	High	High	High	High		0		1.0904	0.42189
P62852	40S ribosomal protein S25 OS=Mus musculus OX=10090 GN=Rps25 PE=1 SV=1	38	6	47	6	1	125	13.7	10.11	386	81.06	5	6	0	4287.98	4994.54	9.99	16.22	4070.2	4954.6	4376.5	4307.9	3730.7	5739.2	5902.2	4613.7	3975.5	4742.1	High	High	High	High	High	High	High	High	High	High	High		0		1.16478	0.109755
P62855	40S ribosomal protein S26 OS=Mus musculus OX=10090 GN=Rps26 PE=1 SV=3	34	3	13	3	1	115	13	11	201	27.97	2	3	0	1266.56	1464.2	8.12	19.78	1147.9	1340.7	1275.6	1364.1	1204.5	1636.7	1848.3	1395.3	1088.9	1351.8	High	High	High	High	High	High	High	High	High	High	High		0		1.15604	0.241038
Q6ZWU9	40S ribosomal protein S27 OS=Mus musculus OX=10090 GN=Rps27 PE=1 SV=3	25	2	8	2	1	84	9.5	9.45	57	11.87	2	2	0	465.64	517.8	3.69	9.17	448.3	456.4	495.1	467.4	461	528.8	587.3	517.7	457.1	498.1	High	High	High	High	High	High	High	High	High	High	High		0		1.11202	0.100323
P62858	40S ribosomal protein S28 OS=Mus musculus OX=10090 GN=Rps28 PE=1 SV=1	46	3	36	3	1	69	7.8	10.7	219	59.97	3	3	0	2750.22	2926.04	15.55	23.94	2366.2	2884.4	2464.5	3299	2737	3511.1	3719.5	2705.9	1978.9	2714.8	High	High	High	High	High	High	High	High	High	High	High		0		1.06393	0.701949
P62274	40S ribosomal protein S29 OS=Mus musculus OX=10090 GN=Rps29 PE=1 SV=2	11	1	2	1	1	56	6.7	10.13	0	2.19	1	1	0	#DIV/0!	#DIV/0!													Medium	Medium	Medium	Medium	Medium	Medium	Medium	Medium	Medium	Medium	Medium		0		#DIV/0!	#DIV/0!
P62908	40S ribosomal protein S3 OS=Mus musculus OX=10090 GN=Rps3 PE=1 SV=1	74	17	85	17	1	243	26.7	9.66	617	159.27	16	17	0	7876.5	9588.38	7.79	17.66	6983	8360.5	7865.4	8432.2	7741.4	10779.3	11578.7	8677.2	7294.8	9611.9	High	High	High	High	High	High	High	High	High	High	High		0		1.21734	0.124328
P62862	40S ribosomal protein S30 OS=Mus musculus OX=10090 GN=Fau PE=1 SV=1	17	1	10	1	1	59	6.6	12.15	23	12.51	1	1	0	995	1136.6	6.68	6.29	1071.3	987.6	1042.2	930.3	943.6	1243.6	1158.3	1107.5	1050	1123.6	High	High	High	High	High	High	High	High	High	High	High		0		1.14231	0.00293181
P97351	40S ribosomal protein S3a OS=Mus musculus OX=10090 GN=Rps3a PE=1 SV=3	49	14	59	14	1	264	29.9	9.73	379	101.39	12	14	0	8269.16	10089.8	10.49	20.8	7196	8886	8136.6	9211.9	7915.3	11721.1	12655.2	9386.6	7399.4	9286.6	High	High	High	High	High	High	High	High	High	High	High		0		1.22017	0.177659
P62702	40S ribosomal protein S4, X isoform OS=Mus musculus OX=10090 GN=Rps4x PE=1 SV=2	57	16	75	16	1	263	29.6	10.15	523	125.04	15	16	0	6607.74	7889.06	8.18	18.89	5701.3	6865.1	6325	7120.6	7026.7	8716.4	9635.2	7831.7	5636.4	7625.6	High	High	High	High	High	High	High	High	High	High	High		0		1.19391	0.192377
Q91V55	40S ribosomal protein S5 OS=Mus musculus OX=10090 GN=Rps5 PE=1 SV=1	25	6	15	6	1	204	22.9	9.72		56.47		6	0	2683.22	3217.08	9.25	19.45	2354.2	2839.7	2714.7	2930.7	2576.8	3746.8	3935.5	3018.6	2393.2	2991.3	High	High	High	High	High	High	High	High	High	High	High		0		1.19896	0.188083
P62754	40S ribosomal protein S6 OS=Mus musculus OX=10090 GN=Rps6 PE=1 SV=1	33	10	54	10	1	249	28.7	10.84	280	102.01	9	10	0	6694.9	7774.74	7.63	17.14	6009.8	7111.5	6681.7	7251.9	6419.6	8663.9	9454	7477.3	5995.5	7283	High	High	High	High	High	High	High	High	High	High	High		0		1.16129	0.195173
P62082	40S ribosomal protein S7 OS=Mus musculus OX=10090 GN=Rps7 PE=2 SV=1	60	9	60	9	1	194	22.1	10.1	369	141.96	8	9	0	3830.74	4653.44	7.88	20.83	3555.9	4026.8	3717.1	4203.7	3650.2	5347.3	5872.6	4363.5	3400	4283.8	High	High	High	High	High	High	High	High	High	High	High		0		1.21476	0.164814
P62242	40S ribosomal protein S8 OS=Mus musculus OX=10090 GN=Rps8 PE=1 SV=2	40	8	53	8	1	208	24.2	10.32	578	112.93	8	8	0	3925.36	4694.48	8.64	19.26	3480.3	4147.8	3897.5	4273	3828.2	5471.5	5740.4	4465.8	3544.6	4250.1	High	High	High	High	High	High	High	High	High	High	High		0		1.19594	0.183096
Q6ZWN5	40S ribosomal protein S9 OS=Mus musculus OX=10090 GN=Rps9 PE=1 SV=3	46	11	47	10	1	194	22.6	10.65	172	73.53	11	10	0	3003	3539.2	9.73	18.2	2610.7	3098	3000.4	3315.1	2990.8	4052.1	4272.3	3303	2650.8	3417.8	High	High	High	High	High	High	High	High	High	High	High		0		1.17855	0.220615
P14206	40S ribosomal protein SA OS=Mus musculus OX=10090 GN=Rpsa PE=1 SV=4	48	13	74	12	1	295	32.8	4.87	788	176.23	12	13	1	6011.18	6979.16	9.85	19.9	5194.1	6386.4	5959.7	6661.3	5854.4	8121.1	8607.7	6395	5168.7	6603.3	High	High	High	High	High	High	High	High	High	High	High		0		1.16103	0.276013
P12672	43 kDa receptor-associated protein of the synapse OS=Mus musculus OX=10090 GN=Rapsn PE=2 SV=4	2	1	1	1	1	412	46.4	8.05	0		1		0	#DIV/0!	#DIV/0!													High	High	High	High	High	High	High	High	High	High	High		0		#DIV/0!	#DIV/0!
Q61112	45 kDa calcium-binding protein OS=Mus musculus OX=10090 GN=Sdf4 PE=1 SV=1	2	1	2	1	1	361	42	4.96	0	2.79	1	1	0	159.38	182.52	5.88	8.67	145.1	154.6	165.2	172.5	159.5	189.8	182.2	158.9	179.6	202.1	High	High	High	High	High	High	High	High	High	High	High		0		1.14519	0.0810196
P61922	4-aminobutyrate aminotransferase, mitochondrial OS=Mus musculus OX=10090 GN=Abat PE=1 SV=1	38	16	65	16	1	500	56.4	8.09	883	143.12	15	16	0	4495.48	4925.48	13.77	40.16	5322.8	3903.1	4325.3	3809.3	5116.9	3662.7	3633.1	5258.4	8251.1	3822.1	High	High	High	High	High	High	High	High	High	High	High		0		1.09565	0.715688
P10852	4F2 cell-surface antigen heavy chain OS=Mus musculus OX=10090 GN=Slc3a2 PE=1 SV=1	23	12	28	12	1	526	58.3	5.91	93	40.95	10	12	0	2354.26	2386	3.71	2.66	2329.6	2374.5	2481.7	2366.3	2219.2	2469.4	2380.6	2350.6	2423.9	2305.5	High	High	High	High	High	High	High	High	High	High	High		0		1.01348	0.528954
Q66JT7	4-hydroxybenzoate polyprenyltransferase, mitochondrial OS=Mus musculus OX=10090 GN=Coq2 PE=2 SV=2	7	3	6	3	1	374	40.5	9.2	43	11.26	3	3	0	591.68	575.72	5.64	2.88	597	630.7	584.8	535.4	610.5	552.2	580.6	569.9	578.2	597.7	High	High	High	High	High	High	High	High	High	High	High		0		0.973026	0.388817
Q8K248	4-hydroxyphenylpyruvate dioxygenase-like protein OS=Mus musculus OX=10090 GN=Hpdl PE=2 SV=1	14	3	8	3	1	371	39.9	6.84	17	9.58	2	2	0	1071.84	1067.7	4.3	1.34	1059.5	1121.2	1069	1002.8	1106.7	1082.7	1082.3	1054.8	1053.3	1065.4	High	High	High	High	High	High	High	High	High	High	High	Oxidation [P33]	1	Oxidation [P33]	0.996137	0.82864
Q9JLJ2	4-trimethylaminobutyraldehyde dehydrogenase OS=Mus musculus OX=10090 GN=Aldh9a1 PE=1 SV=1	37	17	68	16	1	494	53.5	6.98	529	139.23	16	16	1	8096.74	7763.76	1.79	5.76	8284.6	8230.6	7961.3	8092.9	7914.3	8006.8	7648.5	7294.4	8408.1	7461	High	High	High	High	High	High	High	High	High	High	High		0		0.958875	0.12953
Q9JM14	5'(3')-deoxyribonucleotidase, cytosolic type OS=Mus musculus OX=10090 GN=Nt5c PE=1 SV=1	32	5	20	5	1	200	23.1	5.49	142	44.43	5	5	0	1353.76	1421.64	4.51	3	1390.8	1357.2	1434.2	1308.1	1278.5	1445.4	1391.1	1366.4	1472.6	1432.7	High	High	High	High	High	High	High	High	High	High	High		0		1.05014	0.187399
Q8VCE6	5'(3')-deoxyribonucleotidase, mitochondrial OS=Mus musculus OX=10090 GN=Nt5m PE=1 SV=1	19	4	7	4	1	220	25.6	8.35	54	12.28	4	3	0	95.56	98.42	8.07	3.3	105	99.3	96.2	83	94.3	95.9	103.3	99.2	95	98.7	High	High	High	High	High	High	High	High	High	High	High		0		1.02993	0.446752
Q9DBR1	5'-3' exoribonuclease 2 OS=Mus musculus OX=10090 GN=Xrn2 PE=1 SV=1	1	1	2	1	1	951	108.6	7.59	0	3.01	1	1	0	257.26	209.74	14.98	8.72	254.2	262.6	226.2	306.4	236.9	208.8	237.3	204.4	211.8	186.4	High	High	High	High	High	High	High	High	High	High	High		0		0.815284	0.0217215
P70290	55 kDa erythrocyte membrane protein OS=Mus musculus OX=10090 GN=Mpp1 PE=1 SV=1	3	1	2	1	1	466	52.2	7.2	0	2.09	1	1	0	#DIV/0!	#DIV/0!													High	High	High	High	High	High	High	High	High	High	High		0		#DIV/0!	#DIV/0!
Q8VC19	5-aminolevulinate synthase, nonspecific, mitochondrial OS=Mus musculus OX=10090 GN=Alas1 PE=1 SV=2	12	7	23	7	1	642	71	8.53	129	37.08	6	7	0	1139.5	1239.02	10.86	9.08	903.2	1174.7	1196.8	1261.8	1161	1205.9	1243.4	1077.9	1386.7	1281.2	High	High	High	High	High	High	High	High	High	High	High		0		1.08734	0.214163
Q5EG47	5'-AMP-activated protein kinase catalytic subunit alpha-1 OS=Mus musculus OX=10090 GN=Prkaa1 PE=1 SV=2	17	8	18	4	1	559	63.9	8.12	93	32.53	7	7	0	439.3	434.66	13.32	12.53	374.5	516.8	419	498.6	387.6	429.6	360.4	412.5	503.9	466.9	High	High	High	High	High	High	High	High	High	High	High		0		0.989438	0.915508
Q8BRK8	5'-AMP-activated protein kinase catalytic subunit alpha-2 OS=Mus musculus OX=10090 GN=Prkaa2 PE=1 SV=3	23	10	30	6	1	552	62	7.87	346	63.38	10	10	3	3145.72	3059.92	20.89	13.73	2328.6	3983.3	2842	3784.4	2790.3	3033.8	2581.3	2847.1	3713.4	3124	High	High	High	High	High	High	High	High	High	High	High		0		0.972725	0.821664
Q9R078	5'-AMP-activated protein kinase subunit beta-1 OS=Mus musculus OX=10090 GN=Prkab1 PE=1 SV=2	27	4	16	4	1	270	30.3	6.23	214	42.14	4	4	0	677.64	715.72	10.96	7.49	574.2	776.7	652.5	746.8	638	675.6	652	711.9	767.6	771.5	High	High	High	High	High	High	High	High	High	High	High		0		1.0562	0.444381
Q6PAM0	5'-AMP-activated protein kinase subunit beta-2 OS=Mus musculus OX=10090 GN=Prkab2 PE=1 SV=1	22	4	12	4	1	271	30.2	6.46	99	23.03	4	4	0	290.58	289.2	18.9	19.04	209.7	338.8	291.8	348.5	264.1	283.4	228.4	273.7	379.2	281.3	High	High	High	High	High	High	High	High	High	High	High		0		0.995251	0.966589
O54950	5'-AMP-activated protein kinase subunit gamma-1 OS=Mus musculus OX=10090 GN=Prkag1 PE=1 SV=2	34	10	36	8	1	330	37.5	7.14	411	78.61	10	10	2	3344.7	3385.88	14.75	14.16	2740.7	3978	3164.9	3859.6	2980.3	3213.9	2798.4	3165.1	3963.5	3788.5	High	High	High	High	High	High	High	High	High	High	High		0		1.01231	0.908627
Q91WG5	5'-AMP-activated protein kinase subunit gamma-2 OS=Mus musculus OX=10090 GN=Prkag2 PE=1 SV=2	5	3	8	1	1	566	62.9	9.36	95	14.31	3	3	0	148	149.66	9.8	14.25	122.7	164.5	155.9	154.2	142.7	164.3	126.9	128.3	174.3	154.5	High	High	High	High	High	High	High	High	High	High	High		0		1.01122	0.916615
P97478	5-demethoxyubiquinone hydroxylase, mitochondrial OS=Mus musculus OX=10090 GN=Coq7 PE=1 SV=3	56	8	116	8	1	217	24	7.17	655	253.3	8	8	0	10627.4	9826.76	1.61	4.33	10618.3	10751.1	10778.6	10304.1	10685	9434.5	10030.3	9807.1	10434.9	9427	High	High	High	High	High	High	High	High	High	High	High		0		0.924661	0.0331846
L7N466	5-formyltetrahydrofolate cyclo-ligase OS=Mus musculus OX=10090 GN=Mthfsl PE=1 SV=1	23	4	5	4	1	203	23.2	6.7		14.44		4	0	873.34	926.2	11.18	22.83	1047.5	825.8	861.1	865.6	766.7	845.1	796.9	731.1	996.1	1261.8	High	High	High	High	High	High	High	High	High	High	High		0		1.06053	0.69154
A0A2I3BR81	5'-nucleotidase domain-containing 2 OS=Mus musculus OX=10090 GN=Nt5dc2 PE=1 SV=1	2	1	1	1	1	553	63.8	7.59		3.01		1	0	#DIV/0!	#DIV/0!													High	High	High	High	High	High	High	High	High	High	High		0		#DIV/0!	#DIV/0!
Q3UHB1	5'-nucleotidase domain-containing protein 3 OS=Mus musculus OX=10090 GN=Nt5dc3 PE=1 SV=1	15	8	22	8	1	546	63.1	8.56	130	39.8	8	8	0	1375.4	1457.8	7.34	6.58	1413.5	1400.5	1430.2	1176.8	1456	1578.8	1505.1	1467.2	1324	1413.9	High	High	High	High	High	High	High	High	High	High	High		0		1.05991	0.09697
Q61503	5'-nucleotidase OS=Mus musculus OX=10090 GN=Nt5e PE=1 SV=2	9	4	7	3	1	576	63.8	6.64	86	13.14	4	3	0	483.12	492.2	7.2	12.5	472.2	463.5	537.5	474.8	467.6	575.9	529.2	439.6	429.3	487	High	High	High	High	High	High	High	High	High	High	High		0		1.01879	0.81594
Q8K010	5-oxoprolinase OS=Mus musculus OX=10090 GN=Oplah PE=1 SV=1	38	41	186	42	1	1288	137.5	6.28	1949	412.79	39	41	0	13347.4	12487.1	2.85	9.95	13799.7	12841.5	13779.7	13133.9	13182	11935.3	11992.3	12071.3	14698.8	11737.8	High	High	High	High	High	High	High	High	High	High	High	Oxidation [P407; P412]	0		0.935548	0.244147
Q8R1K4	5-phosphohydroxy-L-lysine phospho-lyase OS=Mus musculus OX=10090 GN=Phykpl PE=1 SV=1	10	4	7	4	1	467	51.9	6.46	82	12.85	3	4	0	371.68	368.62	3.6	4.15	377.3	384.6	377.7	346	372.8	364.5	365.7	347.9	389.5	375.5	High	High	High	High	High	High	High	High	High	High	High		0		0.991767	0.822409
P56379	6.8 kDa mitochondrial proteolipid OS=Mus musculus OX=10090 GN=Mp68 PE=1 SV=1	14	1	173	1	1	58	6.7	9.99	358	219.8	1	1	0	21012.8	21781.9	3.31	1.52	21108.3	20758.8	21802.2	20244.5	21150.4	21291.1	22206.4	21716.9	21798	21897	High	High	High	High	High	High	High	High	High	High	High		0		1.0366	0.0788933
P63038	60 kDa heat shock protein, mitochondrial OS=Mus musculus OX=10090 GN=Hspd1 PE=1 SV=1	83	46	1647	46	1	573	60.9	6.18	20823	3832.64	45	46	0	129504	114472	5.63	2.47	118574	136110	128325	138824	125686	113842	112349	119263	114463	112443	High	High	High	High	High	High	High	High	High	High	High	Oxidation [P20; P57; P71; P449; P556]	0		0.883928	0.0186247
O08848	60 kDa SS-A/Ro ribonucleoprotein OS=Mus musculus OX=10090 GN=Trove2 PE=1 SV=1	5	2	4	2	1	538	60.1	7.9	36	8.84	2	2	0	269.84	299.06	9.09	7.74	268.8	302.9	291.6	241.5	244.4	339	299.4	286.6	286.6	283.7	High	High	High	High	High	High	High	High	High	High	High		0		1.10829	0.116294
P14869	60S acidic ribosomal protein P0 OS=Mus musculus OX=10090 GN=Rplp0 PE=1 SV=3	48	13	54	13	1	317	34.2	6.25	586	125.77	12	13	0	5388.58	6102.96	11.6	13.65	4703.4	6078.9	5319.3	5998.4	4842.9	7105.9	6825.7	5656.8	5122.9	5803.5	High	High	High	High	High	High	High	High	High	High	High		0		1.13257	0.24767
P47955	60S acidic ribosomal protein P1 OS=Mus musculus OX=10090 GN=Rplp1 PE=1 SV=1	57	3	47	3	1	114	11.5	4.32	638	119.37	3	3	0	3438.44	3647.64	3.33	12.8	3376.1	3280.4	3613.9	3437.9	3483.9	4034	4178.8	3445.1	3021.5	3558.8	High	High	High	High	High	High	High	High	High	High	High	Oxidation [P41; P44; P68; P70; P76]	0		1.06084	0.446165
P99027	60S acidic ribosomal protein P2 OS=Mus musculus OX=10090 GN=Rplp2 PE=1 SV=3	77	8	79	8	1	115	11.6	4.54	1095	220.86	8	8	0	9540.24	10468.8	6.85	14.01	9883.1	8862.6	10528.8	9033.3	9393.4	11580.7	12202.9	9544.6	8596.8	10418.9	High	High	High	High	High	High	High	High	High	High	High		0		1.09733	0.295733
Q6ZWV3	60S ribosomal protein L10 OS=Mus musculus OX=10090 GN=Rpl10 PE=1 SV=3	20	5	23	5	1	214	24.6	10.08	90	34.02	5	5	0	2987.36	3539.02	7.53	16	2725.1	3129.4	3016.8	3175	2890.5	3984.4	4186.8	3309.3	2761.3	3453.3	High	High	High	High	High	High	High	High	High	High	High		0		1.18466	0.1361
Q9CXW4	60S ribosomal protein L11 OS=Mus musculus OX=10090 GN=Rpl11 PE=1 SV=4	21	4	25	4	1	178	20.2	9.6	215	48.14	4	4	0	2139.72	2476.96	8.38	19.75	2036.4	2201.8	2072	2333.4	2055	2880.5	3025.3	2303.9	1804.2	2370.9	High	High	High	High	High	High	High	High	High	High	High		0		1.15761	0.249547
P35979	60S ribosomal protein L12 OS=Mus musculus OX=10090 GN=Rpl12 PE=1 SV=2	67	10	45	10	1	165	17.8	9.42	353	95.81	10	10	0	5499.3	6310.74	7.38	17.91	5001.1	5591.4	5438.7	6018.6	5446.7	7275	7638.3	5925.6	4880.9	5833.9	High	High	High	High	High	High	High	High	High	High	High		0		1.14755	0.262347
P47963	60S ribosomal protein L13 OS=Mus musculus OX=10090 GN=Rpl13 PE=1 SV=3	42	10	46	10	1	211	24.3	11.55	273	80.8	9	9	0	4137.42	5188.9	5.58	18.63	3831.1	4167.6	4321.6	4323.2	4043.6	6030.9	6260.9	4754.9	3903.8	4994	High	High	High	High	High	High	High	High	High	High	High		0		1.25414	0.102323
P19253	60S ribosomal protein L13a OS=Mus musculus OX=10090 GN=Rpl13a PE=1 SV=4	43	11	50	11	1	203	23.4	11.02	220	77.34	10	9	0	6316.42	7581.68	7.42	19.39	5888.5	6107.5	6277.3	7014.9	6293.9	8552	9465.5	7197.2	5655.8	7037.9	High	High	High	High	High	High	High	High	High	High	High		0		1.20031	0.199901
Q9CR57	60S ribosomal protein L14 OS=Mus musculus OX=10090 GN=Rpl14 PE=1 SV=3	35	9	44	9	1	217	23.5	11.02	449	79.76	9	9	0	3648.72	4427.34	6.78	19.59	3403.2	3577.9	3682.3	3993.9	3586.3	5086.1	5462.1	4150.8	3258.3	4179.4	High	High	High	High	High	High	High	High	High	High	High		0		1.2134	0.174662
Q9CZM2	60S ribosomal protein L15 OS=Mus musculus OX=10090 GN=Rpl15 PE=1 SV=4	30	6	21	6	1	204	24.1	11.62	155	39.45	4	6	0	3078.58	3604.96	10.02	8.39	2736.5	2988.4	2999.2	3623.3	3045.5	3797.4	3796.2	3853	3163.5	3414.7	High	High	High	High	High	High	High	High	High	High	High		0		1.17098	0.124092
Q9CPR4	60S ribosomal protein L17 OS=Mus musculus OX=10090 GN=Rpl17 PE=1 SV=3	42	8	52	7	1	184	21.4	10.18	225	93.38	8	8	0	4386.48	5542.42	8.46	22.38	3887	4383.9	4417.5	4900.9	4343.1	6381.2	7090.5	5131.2	3871.6	5237.6	High	High	High	High	High	High	High	High	High	High	High		0		1.26352	0.164136
P35980	60S ribosomal protein L18 OS=Mus musculus OX=10090 GN=Rpl18 PE=1 SV=3	37	7	43	7	1	188	21.6	11.78	355	82.77	7	7	0	4719.14	5675.72	7.53	20.21	4313.1	4810.2	4743.2	5122.1	4607.1	6485.2	7109	5372.9	4166	5245.5	High	High	High	High	High	High	High	High	High	High	High		0		1.2027	0.184768
P62717	60S ribosomal protein L18a OS=Mus musculus OX=10090 GN=Rpl18a PE=1 SV=1	30	5	27	5	1	176	20.7	10.71	184	57.42	5	5	0	1713.88	2071.2	5.62	16.52	1582.9	1756.7	1749.9	1808.3	1671.6	2335.4	2439.2	1996.2	1566.3	2018.9	High	High	High	High	High	High	High	High	High	High	High		0		1.20849	0.115104
P84099	60S ribosomal protein L19 OS=Mus musculus OX=10090 GN=Rpl19 PE=1 SV=1	20	5	19	4	1	196	23.5	11.47	235	39.8	5	4	0	1754.42	2217.76	8.12	23.09	1566.7	1754	1787	1912	1752.4	2603.8	2828.9	2053.4	1524.9	2077.8	High	High	High	High	High	High	High	High	High	High	High		0		1.2641	0.164197
O09167	60S ribosomal protein L21 OS=Mus musculus OX=10090 GN=Rpl21 PE=1 SV=3	29	7	32	7	1	160	18.6	10.49	163	50.97	5	7	0	1577.32	1678.1	12.01	14.76	1412.1	1602.4	1477.1	1788.5	1606.5	1884.7	1923.6	1685.7	1312.6	1583.9	High	High	High	High	High	High	High	High	High	High	High		0		1.06389	0.574928
P67984	60S ribosomal protein L22 OS=Mus musculus OX=10090 GN=Rpl22 PE=1 SV=2	40	5	30	5	1	128	14.8	9.19	429	57.53	5	5	0	1594.12	2012.8	6.2	23.52	1469.9	1597.7	1635.8	1676.6	1590.6	2421.7	2557.8	1782.1	1408.6	1893.8	High	High	High	High	High	High	High	High	High	High	High		0		1.26264	0.153857
P62830	60S ribosomal protein L23 OS=Mus musculus OX=10090 GN=Rpl23 PE=1 SV=1	49	6	32	6	1	140	14.9	10.51	296	63	6	6	0	2440.5	2857.5	7.34	12.08	2169.7	2537.7	2401.8	2679.5	2413.8	3079.2	3234.5	2649.9	2374.1	2949.8	High	High	High	High	High	High	High	High	High	High	High		0		1.17087	0.118543
P62751	60S ribosomal protein L23a OS=Mus musculus OX=10090 GN=Rpl23a PE=1 SV=1	47	9	54	9	1	156	17.7	10.45	310	101.48	9	9	0	3588.5	4389.22	6.34	19.35	3244.6	3667	3642.1	3828.2	3560.6	5042.8	5393.5	4137.2	3240.6	4132	High	High	High	High	High	High	High	High	High	High	High		0		1.22314	0.144988
Q8BP67	60S ribosomal protein L24 OS=Mus musculus OX=10090 GN=Rpl24 PE=1 SV=2	38	7	26	7	1	157	17.8	11.25	233	49.2	6	7	0	3417.64	4221.56	9.32	21.56	2962.7	3377.7	3458.9	3868	3420.9	4876.2	5332.1	3948.6	2994.1	3956.8	High	High	High	High	High	High	High	High	High	High	High		0		1.23523	0.201373
P61255	60S ribosomal protein L26 OS=Mus musculus OX=10090 GN=Rpl26 PE=1 SV=1	37	8	26	8	1	145	17.2	10.55	54	36.55	8	8	0	2455.34	3032.16	7.81	19.65	2188.5	2506.2	2480	2656.9	2445.1	3497.2	3694.3	2923.1	2179.9	2866.3	High	High	High	High	High	High	High	High	High	High	High		0		1.23492	0.146843
P61358	60S ribosomal protein L27 OS=Mus musculus OX=10090 GN=Rpl27 PE=1 SV=2	32	4	10	4	1	136	15.8	10.56	60	20.25	2	4	0	1842.04	2293.02	7.16	21.87	1660.8	1894.5	1837.3	2025.4	1792.2	2707.7	2849.5	2170.8	1595.4	2141.7	High	High	High	High	High	High	High	High	High	High	High		0		1.24483	0.164574
P14115	60S ribosomal protein L27a OS=Mus musculus OX=10090 GN=Rpl27a PE=1 SV=5	39	6	26	6	1	148	16.6	11.12	129	45.03	6	6	0	2353.96	2654.96	11.48	19.18	2042.6	2420.4	2311	2669.9	2325.9	3086.2	3199.4	2628.9	1952.5	2407.8	High	High	High	High	High	High	High	High	High	High	High		0		1.12787	0.380129
P41105	60S ribosomal protein L28 OS=Mus musculus OX=10090 GN=Rpl28 PE=1 SV=2	49	9	30	9	1	137	15.7	12.02	162	50.93	8	8	0	4839	6060.8	9.37	21.35	4296.9	4825.3	4856.1	5469.1	4747.6	7028.9	7600.8	5741.8	4299.3	5633.2	High	High	High	High	High	High	High	High	High	High	High		0		1.25249	0.169229
P47915	60S ribosomal protein L29 OS=Mus musculus OX=10090 GN=Rpl29 PE=1 SV=2	20	4	21	4	1	160	17.6	11.84	104	25.38	4	4	0	1409.32	1875.6	7.19	22.41	1252	1369.5	1456.1	1558.2	1410.8	2222.5	2351.2	1738.8	1302.5	1763	High	High	High	High	High	High	High	High	High	High	High		0		1.33085	0.116212
P27659	60S ribosomal protein L3 OS=Mus musculus OX=10090 GN=Rpl3 PE=1 SV=3	23	10	27	9	1	403	46.1	10.21	181	48.15	9	10	0	3233.44	3610.7	5.4	13.93	3135	3280.5	3340.4	3399.6	3011.7	4117.2	4158.8	3410.1	3025.7	3341.7	High	High	High	High	High	High	High	High	High	High	High		0		1.11667	0.209881
P62889	60S ribosomal protein L30 OS=Mus musculus OX=10090 GN=Rpl30 PE=1 SV=2	50	5	24	5	1	115	12.8	9.63	222	48.78	5	5	0	2054.38	2495.86	5.41	18.51	1952.4	2002.9	2081.8	2209.7	2025.1	2879.4	2988.1	2409.8	1831.9	2370.1	High	High	High	High	High	High	High	High	High	High	High		0		1.2149	0.148985
P62900	60S ribosomal protein L31 OS=Mus musculus OX=10090 GN=Rpl31 PE=1 SV=1	53	8	40	8	1	125	14.5	10.54	264	65.81	8	8	0	3896	4767.32	7.37	19.47	3505.2	3848.5	3958.7	4227.4	3940.2	5477.1	5922.7	4392.5	3599.4	4444.9	High	High	High	High	High	High	High	High	High	High	High		0		1.22364	0.163669
P62911	60S ribosomal protein L32 OS=Mus musculus OX=10090 GN=Rpl32 PE=1 SV=2	43	6	18	6	1	135	15.9	11.33	100	27.54	6	5	0	2019.04	2470.54	8.19	20.44	1791.9	2061.7	2015.5	2228.9	1997.2	2900.9	3047.4	2337.7	1807.8	2258.9	High	High	High	High	High	High	High	High	High	High	High		0		1.22362	0.178138
Q9D1R9	60S ribosomal protein L34 OS=Mus musculus OX=10090 GN=Rpl34 PE=1 SV=2	28	4	26	4	1	117	13.3	11.47	126	36.42	4	4	0	2104.08	2631.62	9.17	22.85	1879.5	2105.7	2078	2334.7	2122.5	3082.1	3356.2	2484.2	1827.8	2407.8	High	High	High	High	High	High	High	High	High	High	High		0		1.25072	0.180628
Q6ZWV7	60S ribosomal protein L35 OS=Mus musculus OX=10090 GN=Rpl35 PE=1 SV=1	25	4	13	3	1	123	14.5	11.05	78	21.38	3	4	0	1254.94	1555.38	6.73	22.63	1150.1	1228.2	1285.9	1369.3	1241.2	1859	1941.3	1456.4	1072.9	1447.3	High	High	High	High	High	High	High	High	High	High	High		0		1.23941	0.188275
O55142	60S ribosomal protein L35a OS=Mus musculus OX=10090 GN=Rpl35a PE=1 SV=2	32	4	18	4	1	110	12.5	10.89	65	33.5	3	4	0	3124.06	3683.68	7.9	20.37	2856.2	3128.1	3075.1	3396.2	3164.7	4217.3	4605.4	3501.7	2677	3417	High	High	High	High	High	High	High	High	High	High	High		0		1.17913	0.236297
Q6ZWZ4	60S ribosomal protein L36 OS=Mus musculus OX=10090 GN=Rpl36 PE=1 SV=1	34	4	5	5	1	105	12.2	11.59		16.68		4	0	1439.46	1782.5	7.03	22.73	1332.7	1443.8	1466.3	1553.7	1400.8	2078.2	2274.3	1631.9	1238.2	1689.9	High	High	High	High	High	High	High	High	High	High	High		0		1.23831	0.17491
P83882	60S ribosomal protein L36a OS=Mus musculus OX=10090 GN=Rpl36a PE=3 SV=2	24	3	12	3	1	106	12.4	10.58	67	19.1	3	3	0	1679.18	2028.78	4.75	18.83	1566.9	1688.8	1699.8	1761.7	1678.7	2307.1	2499.5	1885.9	1524.9	1926.5	High	High	High	High	High	High	High	High	High	High	High		0		1.2082	0.144549
Q9D823	60S ribosomal protein L37 OS=Mus musculus OX=10090 GN=Rpl37 PE=3 SV=3	31	4	9	4	1	97	11.1	11.74	51	9.72	3	4	0	1202.92	1417.6	10.09	20.59	1100.2	1197.7	1124.1	1375.9	1216.7	1625.6	1788	1364.1	1056	1254.3	High	High	High	High	High	High	High	High	High	High	High		0		1.17847	0.267129
P61514	60S ribosomal protein L37a OS=Mus musculus OX=10090 GN=Rpl37a PE=1 SV=2	16	2	3	2	1	92	10.3	10.43	0	4.99	1	2	0	#DIV/0!	#DIV/0!													High	High	High	High	High	High	High	High	High	High	High		0		#DIV/0!	#DIV/0!
Q9JJI8	60S ribosomal protein L38 OS=Mus musculus OX=10090 GN=Rpl38 PE=1 SV=3	33	4	11	3	1	70	8.2	10.1	58	15.57	3	4	1	3812.12	3818.72	7.98	28.77	3736.9	3841.4	3477.2	4174.7	3830.4	3968.9	3781.2	5436.8	2366.9	3539.8	High	High	High	High	High	High	High	High	High	High	High		0		1.00173	0.991779
P62892	60S ribosomal protein L39 OS=Mus musculus OX=10090 GN=Rpl39 PE=1 SV=2	20	1	2	1	1	51	6.4	12.56	0	3.8	1	1	0	110	120.36	7.26	9.19	101.9	106.1	124.5	110.2	107.3	131.9	130.3	120.2	105.8	113.6	High	High	High	High	High	High	High	High	High	High	High		0		1.09418	0.221691
Q9D8E6	60S ribosomal protein L4 OS=Mus musculus OX=10090 GN=Rpl4 PE=1 SV=3	37	17	64	17	1	419	47.1	11	448	135.33	17	17	0	5658.04	7013.94	8.32	20.8	5049.9	5719.5	5684.1	6235	5601.7	7988.9	8851.8	6584	5059.9	6585.1	High	High	High	High	High	High	High	High	High	High	High		0		1.23964	0.160364
P47962	60S ribosomal protein L5 OS=Mus musculus OX=10090 GN=Rpl5 PE=1 SV=3	32	11	40	11	1	297	34.4	9.77	122	62.59	11	11	0	4027.48	4942	6.16	18.85	3647.4	4103	4133.2	4303.7	3950.1	5579.8	6074.6	4640.2	3653.8	4761.6	High	High	High	High	High	High	High	High	High	High	High		0		1.22707	0.134655
P47911	60S ribosomal protein L6 OS=Mus musculus OX=10090 GN=Rpl6 PE=1 SV=3	39	14	54	14	1	296	33.5	10.7	317	97.02	13	14	0	6056.46	7286.06	6.76	16.42	5519.4	5956.5	6210.1	6581.4	6014.9	8157.3	8657.8	6935.5	5574.9	7104.8	High	High	High	High	High	High	High	High	High	High	High		0		1.20302	0.147717
P14148	60S ribosomal protein L7 OS=Mus musculus OX=10090 GN=Rpl7 PE=1 SV=2	37	14	57	14	1	270	31.4	10.89	284	95.41	14	14	0	4208.06	4892.86	8.47	17.27	3765.2	4337	4275.8	4551.7	4110.6	5545.8	5919.8	4665.4	3800.6	4532.7	High	High	High	High	High	High	High	High	High	High	High		0		1.16274	0.210497
P12970	60S ribosomal protein L7a OS=Mus musculus OX=10090 GN=Rpl7a PE=1 SV=2	37	12	53	11	1	266	30	10.56	371	100.71	11	11	0	4423.18	5334.36	6.87	19.69	4189	4331.8	4445.5	4838.4	4311.2	6185.5	6553.5	5085.6	3932.2	4915	High	High	High	High	High	High	High	High	High	High	High		0		1.206	0.181608
P62918	60S ribosomal protein L8 OS=Mus musculus OX=10090 GN=Rpl8 PE=1 SV=2	41	10	36	10	1	257	28	11.03	180	61.21	8	10	0	3540.9	4182.84	6.79	17.06	3224.4	3659.8	3692.3	3605.2	3522.8	5020.4	4798.2	3847.8	3292.9	3954.9	High	High	High	High	High	High	High	High	High	High	High		0		1.18129	0.159602
P51410	60S ribosomal protein L9 OS=Mus musculus OX=10090 GN=Rpl9 PE=2 SV=2	46	9	36	9	1	192	21.9	9.95	291	64.87	9	9	0	3224.24	3902.82	7.47	17.63	2892.3	3402.7	3203.6	3432.8	3189.8	4377.1	4755.2	3575.5	2993.9	3812.4	High	High	High	High	High	High	High	High	High	High	High		0		1.21046	0.124555
P70266	6-phosphofructo-2-kinase/fructose-2,6-bisphosphatase 1 OS=Mus musculus OX=10090 GN=Pfkfb1 PE=1 SV=2	23	9	23	8	1	471	54.8	6.76	91	43.5	7	9	0	978.74	895.18	3.79	29.39	1033.5	928.3	998.3	978.2	955.4	699.4	742.9	807.5	1350.5	875.6	High	High	High	High	High	High	High	High	High	High	High		0		0.914625	0.527575
A0A087WRM7	6-phosphofructo-2-kinase/fructose-2,6-bisphosphatase 2 OS=Mus musculus OX=10090 GN=Pfkfb2 PE=1 SV=1	30	16	27	15	1	556	64	7.84		106.51		16	1	3439.48	3437.98	5.43	5.99	3117.8	3366.8	3492.8	3601	3619	3312.1	3363.6	3464.8	3782.3	3267.1	High	High	High	High	High	High	High	High	High	High	High		0		0.999564	0.988614
Q9DCD0	6-phosphogluconate dehydrogenase, decarboxylating OS=Mus musculus OX=10090 GN=Pgd PE=1 SV=3	48	22	141	21	1	483	53.2	7.23	1554	288.24	20	22	0	13333.3	13730.4	6.06	7.2	14835.3	12533.5	13435.9	13070.3	12791.5	15433.8	13528	13561	13232.7	12896.6	High	High	High	High	High	High	High	High	High	High	High		0		1.02978	0.0856717
Q9CQ60	6-phosphogluconolactonase OS=Mus musculus OX=10090 GN=Pgls PE=1 SV=1	67	12	86	12	1	257	27.2	5.85	867	198.49	12	12	0	7674.42	7367.08	8.16	7.26	7423.5	8573.7	7296.1	8197.7	6881.1	7570.2	6639.8	7104.7	8074.4	7446.3	High	High	High	High	High	High	High	High	High	High	High		0		0.959953	0.512239
Q9R1Z7	6-pyruvoyl tetrahydrobiopterin synthase OS=Mus musculus OX=10090 GN=Pts PE=1 SV=2	24	3	5	3	1	144	16.2	6.52	0	8.18	2	3	0	441.96	415.26	12.04	3.48	541.8	415.2	411.1	419	422.7	415.9	419.7	430.6	418.7	391.4	High	High	High	High	High	High	High	High	High	High	High		0		0.939587	0.364812
Q3UFY7	7-methylguanosine phosphate-specific 5'-nucleotidase OS=Mus musculus OX=10090 GN=Nt5c3b PE=1 SV=3	39	10	24	10	1	300	34.4	6.24	66	43.14	9	10	0	244.82	247.4	4.5	5.51	245.5	245.9	251.9	224.5	256.3	266.6	254.2	244.2	241.4	230.6	High	High	High	High	High	High	High	High	High	High	High		0		1.01054	0.779624
Q8K3A9	7SK snRNA methylphosphate capping enzyme OS=Mus musculus OX=10090 GN=Mepce PE=1 SV=2	3	2	4	2	1	666	72	9.25	51	6.39	2	2	0	152.92	160.86	7.96	11.37	136.7	154.1	169	162	142.8	182.6	161.7	148.4	137.7	173.9	High	High	High	High	High	High	High	High	High	High	High		0		1.05192	0.596909
P97819	85/88 kDa calcium-independent phospholipase A2 OS=Mus musculus OX=10090 GN=Pla2g6 PE=1 SV=3	1	1	2	1	1	807	89.5	7.24	0	1.86	1	1	0	12.2	14.42	35.73	44.52		17.5	8.8	8.2	14.3	24.7	7.8	15.9	12.4	11.3	Not Found	Medium	Medium	Medium	Medium	Medium	Medium	Medium	Medium	Medium	Medium		0		1.18197	0.931903
F8VQ03	A disintegrin and metallopeptidase domain 3 OS=Mus musculus OX=10090 GN=Adam3 PE=1 SV=1	1	1	2	1	1	822	91.4	5.95	15		1		0	87.2	82.02	7.72	9.74	79.7	86	87.8	97.4	85.1	70.9	77	88.4	89.9	83.9	Medium	Medium	Medium	Medium	Medium	Medium	Medium	Medium	Medium	Medium	Medium	Oxidation [P375]	1	Oxidation [P375]	0.940596	0.0630964
Q3V0I7	A kinase (PRKA) anchor protein 14 OS=Mus musculus OX=10090 GN=Akap14 PE=1 SV=1	1	1	1	1	1	536	58.2	9.77		2.1		1	0	#DIV/0!	#DIV/0!													Medium	Medium	Medium	Medium	Medium	Medium	Medium	Medium	Medium	Medium	Medium		0		#DIV/0!	#DIV/0!
Q5RL57	A kinase (PRKA) anchor protein 8-like OS=Mus musculus OX=10090 GN=Akap8l PE=1 SV=1	6	3	4	3	1	641	71.3	5.06		10.34		3	0	405.84	422.8	10.33	5.95	339.4	467.3	416.7	400.2	405.6	459.9	405.1	395	423.1	430.9	High	High	High	High	High	High	High	High	High	High	High		0		1.04179	0.607628
Q8BYZ1	ABI gene family member 3 OS=Mus musculus OX=10090 GN=Abi3 PE=1 SV=3	4	1	2	1	1	367	39.1	5.54	0	4.03	1	1	0	#DIV/0!	#DIV/0!													High	High	High	High	High	High	High	High	High	High	High		0		#DIV/0!	#DIV/0!
Q8CBW3	Abl interactor 1 OS=Mus musculus OX=10090 GN=Abi1 PE=1 SV=3	5	2	4	2	1	481	52.3	7.64	35	10.15	2	2	0	61.98	69.68	12.74	14.07	48.3	69.4	60.6	62.3	69.3	84.9	58.9	71.5	69.2	63.9	High	High	High	High	High	High	High	High	High	High	High		0		1.12423	0.401541
Q8CJ27	Abnormal spindle-like microcephaly-associated protein homolog OS=Mus musculus OX=10090 GN=Aspm PE=1 SV=2	0	1	3	1	1	3122	364	10.62		4.63		1	0	303.84	327.62	5.61	11.42	310.8	331.2	281.9	296.3	299	329.8	386	306.2	286.1	330	Medium	Medium	Medium	Medium	Medium	Medium	Medium	Medium	Medium	Medium	Medium		0		1.07826	0.0855951
Q9DAZ9	Abscission/NoCut checkpoint regulator OS=Mus musculus OX=10090 GN=Zfyve19 PE=1 SV=2	2	1	4	1	1	389	43.2	6.54	0		1		0	679.02	653.26	5.75	3.36	647.8	619.6	706.7	713.3	707.7	662.3	687	631.1	642.8	643.1	High	High	High	High	High	High	High	High	High	High	High		0		0.962063	0.417823
Q9D2R0	Acetoacetyl-CoA synthetase OS=Mus musculus OX=10090 GN=Aacs PE=1 SV=1	1	1	3	1	1	672	75.2	6.71	0	1.63	1	1	0	371.28	386	51.46	31.34	254.9	732.7	353.5	245.6	269.7	571	273	368.3	428.6	289.1	High	High	High	High	High	High	High	High	High	High	High		0		1.03965	0.916071
Q8BU33	Acetolactate synthase-like protein OS=Mus musculus OX=10090 GN=Ilvbl PE=1 SV=1	17	7	20	7	1	632	68.1	8.69	130	42.24	7	7	0	937.04	908.94	2.81	3.81	920.6	971.3	963.4	907.9	922	882.9	902.1	915.7	964.9	879.1	High	High	High	High	High	High	High	High	High	High	High		0		0.970012	0.26948
Q8CAY6	Acetyl-CoA acetyltransferase, cytosolic OS=Mus musculus OX=10090 GN=Acat2 PE=1 SV=2	16	4	11	4	1	397	41.3	7.5	115	27.23	4	4	0	375.22	410.8	12.16	11.57	460.7	341.9	383.3	343.9	346.3	491.6	378.1	414.4	378.5	391.4	High	High	High	High	High	High	High	High	High	High	High		0		1.09482	0.000162172
Q8QZT1	Acetyl-CoA acetyltransferase, mitochondrial OS=Mus musculus OX=10090 GN=Acat1 PE=1 SV=1	63	22	653	22	1	424	44.8	8.51	8676	1475.67	21	21	0	60138.9	57519.2	6.37	2.98	57878.3	66061.7	57884.8	56896.5	61973.3	57889.6	60243.1	55675.3	56925.5	56862.3	High	High	High	High	High	High	High	High	High	High	High	Oxidation [P111; P115]	0		0.956438	0.101361
Q5SWU9	Acetyl-CoA carboxylase 1 OS=Mus musculus OX=10090 GN=Acaca PE=1 SV=1	3	6	11	1	1	2345	265.1	6.39	60	24.12	4	6	0	#DIV/0!	#DIV/0!													High	High	High	High	High	High	High	High	High	High	High		0		#DIV/0!	#DIV/0!
E9Q4Z2	Acetyl-CoA carboxylase 2 OS=Mus musculus OX=10090 GN=Acacb PE=1 SV=1	10	20	43	15	1	2448	275.6	6.32	411	89.88	18	20	1	2400.36	2087.84	28.28	10.29	1606.1	3242.6	2267.3	3024.7	1861.1	2305.7	1861	1909.8	2316.2	2046.5	High	High	High	High	High	High	High	High	High	High	High		0		0.869803	0.432845
Q99NB1	Acetyl-coenzyme A synthetase 2-like, mitochondrial OS=Mus musculus OX=10090 GN=Acss1 PE=1 SV=1	60	32	579	32	1	682	74.6	6.98	5751	1343.74	31	32	0	53816	52819.1	3.27	5.26	53804.6	57181.4	52672.7	52700.7	52720.7	49733.5	52262.1	50851.1	56469.4	54779.2	High	High	High	High	High	High	High	High	High	High	High	Oxidation [P43; P62; P68; P79; P252; P259; P497]	7	Oxidation [P43; P62; P68; P79; P252; P259; P497]	0.981475	0.588337
Q9QXG4	Acetyl-coenzyme A synthetase, cytoplasmic OS=Mus musculus OX=10090 GN=Acss2 PE=1 SV=2	11	7	20	7	1	701	78.8	6.64	159	37.52	7	7	0	1389.88	1463.16	7.44	11.52	1552.3	1333.4	1465.8	1304.8	1293.1	1695.8	1574.8	1312.3	1314.1	1418.8	High	High	High	High	High	High	High	High	High	High	High		0		1.05272	0.339489
Q99J27	Acetyl-coenzyme A transporter 1 OS=Mus musculus OX=10090 GN=Slc33a1 PE=1 SV=1	2	1	2	1	1	550	61	8.16	0	0	1	1	0	60.36	59.74	9.04	3.14	61.3	58.9	64	66	51.6	60.1	56.9	62	60.3	59.4	High	High	High	High	High	High	High	High	High	High	High		0		0.989728	0.796146
Q9WV54	Acid ceramidase OS=Mus musculus OX=10090 GN=Asah1 PE=1 SV=1	21	8	22	8	1	394	44.6	8.46	131	31.43	8	8	0	940.98	1007.82	19.54	12.82	1269	855.4	815.1	863	902.4	1052.9	871	1141.6	1103.5	870.1	High	High	High	High	High	High	High	High	High	High	High		0		1.07103	0.530635
Q8BX37	Acid phosphatase type 7 OS=Mus musculus OX=10090 GN=Acp7 PE=2 SV=2	3	1	2	1	1	438	50.6	9.04	0	0	1	1	0	7.36	7.88	13.88	29.93	7.6	6.7	7.8	6.6	8.1	9.7	3.8	9.2	8.7	8	High	High	High	High	High	High	High	High	High	High	High		0		1.07065	0.611301
P70158	Acid sphingomyelinase-like phosphodiesterase 3a OS=Mus musculus OX=10090 GN=Smpdl3a PE=1 SV=2	6	2	10	2	1	445	49.8	6.46	42	15.36	1	2	0	218.42	232.48	3.96	5.42	213.8	226.3	230.9	209.3	211.8	245.2	220.5	229.3	221.1	246.3	High	High	High	High	High	High	High	High	High	High	High		0		1.06437	0.163778
Q80WP8	Acidic amino acid decarboxylase GADL1 OS=Mus musculus OX=10090 GN=Gadl1 PE=1 SV=3	1	1	1	1	1	550	62.5	6.96		0		1	0	642.48	590.88	42.59	3.14	524.5	1108.4	521.3	510	548.2	580.1	610.4	565.4	592.7	605.8	Medium	Medium	Medium	Medium	Medium	Medium	Medium	Medium	Medium	Medium	Medium		0		0.919686	0.668334
O35381	Acidic leucine-rich nuclear phosphoprotein 32 family member A OS=Mus musculus OX=10090 GN=Anp32a PE=1 SV=1	40	14	123	11	1	247	28.5	4.07	818	212.28	14	14	3	12700.7	13444	3.7	11.25	12335.1	12711.3	13351.5	12559	12546.6	14030.4	15065.9	11859.2	11815.3	14449	High	High	High	High	High	High	High	High	High	High	High		0		1.05852	0.392606
Q9EST5	Acidic leucine-rich nuclear phosphoprotein 32 family member B OS=Mus musculus OX=10090 GN=Anp32b PE=1 SV=1	21	8	36	5	1	272	31.1	4.01	157	55.7	7	8	0	976.56	1067.62	2.61	12.36	979.1	1011.9	968.4	979.2	944.2	1149.2	1243.3	975.1	914.4	1056.1	High	High	High	High	High	High	High	High	High	High	High		0		1.09325	0.165501
P97822	Acidic leucine-rich nuclear phosphoprotein 32 family member E OS=Mus musculus OX=10090 GN=Anp32e PE=1 SV=2	30	6	24	6	1	260	29.6	3.88	414	59.83	6	6	0	1174.42	1210.36	3.29	2.9	1141.3	1212.6	1206.1	1162.3	1149.8	1204.6	1260.7	1164.3	1222.1	1200.1	High	High	High	High	High	High	High	High	High	High	High		0		1.0306	0.141254
Q9R0Y1	Acid-sensing ion channel 5 OS=Mus musculus OX=10090 GN=Asic5 PE=2 SV=1	1	1	2	1	1	495	56.5	7.74	27	2.6	1	1	0	181.36	170.54	15.61	16.46	183.6	157.1	232.6	178.8	154.7	136.7	169.4	188.1	207.1	151.4	High	High	High	High	High	High	High	High	High	High	High		0		0.94034	0.513144
A0A2R8W744	Aconitate hydratase, mitochondrial (Fragment) OS=Mus musculus OX=10090 GN=Aco2 PE=1 SV=1	25	4	83	1	1	194	20.4	7.42		313.88		4	0	363.9	391.6	7.12	11.66	377	377.7	358.3	317.4	389.1	353.3	362.4	361.5	427	453.8	High	High	High	High	High	High	High	High	High	High	High	Oxidation [P112]	1	Oxidation [P112]	1.07612	0.341096
Q99KI0	Aconitate hydratase, mitochondrial OS=Mus musculus OX=10090 GN=Aco2 PE=1 SV=1	66	54	4133	51	1	780	85.4	7.93	50872	9989.39	51	54	5	328996	319326	2.88	3.65	336382	321338	320837	323137	343284	306411	318144	323682	336636	311758	High	High	High	High	High	High	High	High	High	High	High	Oxidation [P39; P77; P121; P244; P450; P539; P547; P548; P570; P712]	0		0.970609	0.343822
Q3V140	Acrosin-binding protein OS=Mus musculus OX=10090 GN=Acrbp PE=1 SV=1	1	1	1	1	1	540	61.1	4.98	0		1		0	#DIV/0!	#DIV/0!													High	High	High	High	High	High	High	High	High	High	High		0		#DIV/0!	#DIV/0!
Q80YS6	Actin filament-associated protein 1 OS=Mus musculus OX=10090 GN=Afap1 PE=1 SV=1	1	1	3	1	1	731	80.6	8.68	0	3.53	1	1	0	#DIV/0!	#DIV/0!													High	High	High	High	High	High	High	High	High	High	High		0		#DIV/0!	#DIV/0!
P68134	Actin, alpha skeletal muscle OS=Mus musculus OX=10090 GN=Acta1 PE=1 SV=1	63	22	1351	2	1	377	42	5.39	13879	2664.19	21	22	0	263.5	252.72	7.52	3.99	273.1	284.2	248	238.3	273.9	258.7	246.7	260.4	237.8	260	High	High	High	High	High	High	High	High	High	High	High	Oxidation [P174; P245; P324]	0		0.959089	0.264118
P62737	Actin, aortic smooth muscle OS=Mus musculus OX=10090 GN=Acta2 PE=1 SV=1	63	22	1842	2	1	377	42	5.39	25982	4175.58	21	22	35	175031	162712	15.43	11.42	196260	211973	149360	147658	169904	186141	150867	142378	156104	178067	High	High	High	High	High	High	High	High	High	High	High	Oxidation [P174; P245; P324]	0		0.929614	0.389483
E9Q2D1	Actin, cytoplasmic 1 (Fragment) OS=Mus musculus OX=10090 GN=Actb PE=1 SV=1	44	4	105	1	1	108	11.4	4.93		395.51		4	0	135.36	119.86	7.47	4.5	145.7	148.6	128.7	122.4	131.4	124.6	115.9	123.6	112.4	122.8	High	High	High	High	High	High	High	High	High	High	High		0		0.885491	0.0376654
P60710	Actin, cytoplasmic 1 OS=Mus musculus OX=10090 GN=Actb PE=1 SV=1	63	21	1022	9	1	375	41.7	5.48	9152	1863.84	20	21	0	5472.54	5855.82	10.57	7.03	5361.5	6548.3	4938.9	5257.4	5256.6	6110.9	5741.2	5278.5	5781.2	6367.3	High	High	High	High	High	High	High	High	High	High	High	Oxidation [P243; P322]	2	Oxidation [P243; P322]	1.07004	0.302563
Q8K4G5	Actin-binding LIM protein 1 OS=Mus musculus OX=10090 GN=Ablim1 PE=1 SV=1	10	8	16	8	1	861	96.7	8.63	77	32.3	7	7	0	1531.12	1607.98	4.57	5.72	1481.6	1492.5	1497.9	1552.9	1630.7	1652.5	1697	1456	1598.4	1636	High	High	High	High	High	High	High	High	High	High	High		0		1.0502	0.181784
Q91WC0	Actin-histidine N-methyltransferase OS=Mus musculus OX=10090 GN=Setd3 PE=1 SV=1	6	2	3	2	1	594	67.1	5.6	59	8.72	1	2	0	53.88	55.38	7.57	11.4	50.4	52.5	53.8	51.7	61	48.9	52.6	51.9	58.9	64.6	High	High	High	High	High	High	High	High	High	High	High		0		1.02784	0.433277
Q9Z2N8	Actin-like protein 6A OS=Mus musculus OX=10090 GN=Actl6a PE=1 SV=2	15	6	22	6	1	429	47.4	5.6	183	42.04	6	6	0	1560.46	1536.5	5.94	2.77	1624.6	1469	1693.4	1485.4	1529.9	1546.8	1603.8	1492.1	1512.4	1527.4	High	High	High	High	High	High	High	High	High	High	High		0		0.984646	0.690534
Q9QZB7	Actin-related protein 10 OS=Mus musculus OX=10090 GN=Actr10 PE=1 SV=2	23	6	17	6	1	417	46.2	7.61	240	43.13	5	6	0	622.1	624.56	7.55	5.81	558.9	699.6	595.8	636.5	619.7	605.6	598.2	591.3	666.3	661.4	High	High	High	High	High	High	High	High	High	High	High		0		1.00395	0.932921
P61161	Actin-related protein 2 OS=Mus musculus OX=10090 GN=Actr2 PE=1 SV=1	28	13	61	12	1	394	44.7	6.74	436	123.57	11	13	0	4182.44	4170.96	4.46	4.45	4020.6	4420.1	4051.2	4324.5	4095.8	4371.6	4336.3	3962.4	4007	4177.5	High	High	High	High	High	High	High	High	High	High	High		0		0.997255	0.922371
Q9R0Q6	Actin-related protein 2/3 complex subunit 1A OS=Mus musculus OX=10090 GN=Arpc1a PE=1 SV=1	19	8	20	8	1	370	41.6	8.18	120	34.95	8	8	0	3264.88	3490	2	6.81	3162.1	3304.7	3306.8	3218.2	3332.6	3698.7	3642	3328.8	3152.3	3628.2	High	High	High	High	High	High	High	High	High	High	High		0		1.06895	0.109339
Q9WV32	Actin-related protein 2/3 complex subunit 1B OS=Mus musculus OX=10090 GN=Arpc1b PE=1 SV=4	12	4	10	4	1	372	41	8.35	42	17.38	4	4	0	804.2	959.62	4.16	5.84	783.7	814.5	821.6	843.6	757.6	1021.9	993.3	910.1	891.6	981.2	High	High	High	High	High	High	High	High	High	High	High		0		1.19326	0.0142723
Q9CVB6	Actin-related protein 2/3 complex subunit 2 OS=Mus musculus OX=10090 GN=Arpc2 PE=1 SV=3	33	11	53	11	1	300	34.3	7.36	261	95.51	11	11	0	7368.32	7844.2	2.24	3.56	7231.3	7256.3	7426.7	7662	7265.3	7969.7	8166.8	7809.6	7407.1	7867.8	High	High	High	High	High	High	High	High	High	High	High		0		1.06458	0.0780713
Q9JM76	Actin-related protein 2/3 complex subunit 3 OS=Mus musculus OX=10090 GN=Arpc3 PE=1 SV=3	32	7	22	7	1	178	20.5	8.59	117	29.79	7	6	0	1565.32	1659.78	2.29	2.7	1511.8	1599.8	1592.6	1580	1542.4	1706.2	1693.6	1626.1	1601	1672	High	High	High	High	High	High	High	High	High	High	High		0		1.06035	0.0414586
P59999	Actin-related protein 2/3 complex subunit 4 OS=Mus musculus OX=10090 GN=Arpc4 PE=1 SV=3	64	10	35	10	1	168	19.7	8.43	163	58.85	9	10	0	4325.62	4602.28	1.74	3.95	4229.8	4324	4424.8	4370.3	4279.2	4743.5	4746.6	4636	4302.9	4582.4	High	High	High	High	High	High	High	High	High	High	High		0		1.06396	0.0508122
Q9CPW4	Actin-related protein 2/3 complex subunit 5 OS=Mus musculus OX=10090 GN=Arpc5 PE=1 SV=3	57	7	16	7	1	151	16.3	5.67	187	38.83	6	7	0	2147.88	2337.56	4.43	8.7	2109.6	2222.4	2091	2248.9	2067.5	2594.9	2437.2	2170.7	2095.3	2389.7	High	High	High	High	High	High	High	High	High	High	High		0		1.08831	0.155393
Q9D898	Actin-related protein 2/3 complex subunit 5-like protein OS=Mus musculus OX=10090 GN=Arpc5l PE=1 SV=1	68	9	30	9	1	153	17	6.8	290	84.85	9	9	0	2299.96	2326.86	2.36	4.89	2327.4	2232.8	2377.9	2317.3	2244.4	2397.2	2411.5	2235.3	2174.3	2416	High	High	High	High	High	High	High	High	High	High	High		0		1.0117	0.727327
Q99JY9	Actin-related protein 3 OS=Mus musculus OX=10090 GN=Actr3 PE=1 SV=3	53	19	74	19	1	418	47.3	5.88	754	172.19	17	19	0	6424.9	6925	2.35	4.52	6263.6	6542.3	6587.7	6503.2	6227.7	7245.6	7224.7	6595.4	6624.7	6934.6	High	High	High	High	High	High	High	High	High	High	High		0		1.07784	0.0549634
P11031	Activated RNA polymerase II transcriptional coactivator p15 OS=Mus musculus OX=10090 GN=Sub1 PE=1 SV=3	9	1	2	1	1	127	14.4	9.6	62	4.51	1	1	0	210.98	231	13.72	20.84	224.2	258.9	202.5	177	192.3	282.3	261.7	190.8	170.1	250.1	High	High	High	High	High	High	High	High	High	High	High		0		1.09489	0.270245
Q8BK64	Activator of 90 kDa heat shock protein ATPase homolog 1 OS=Mus musculus OX=10090 GN=Ahsa1 PE=1 SV=2	28	10	26	10	1	338	38.1	5.53	190	55.46	8	10	0	2652.8	2390.56	19.46	5.05	2062.4	3330.5	2656.9	3120.6	2093.6	2559.3	2299.8	2266.1	2364.2	2463.4	High	High	High	High	High	High	High	High	High	High	High		0		0.901146	0.434541
Q8N9S3	Activator of 90 kDa heat shock protein ATPase homolog 2 OS=Mus musculus OX=10090 GN=Ahsa2 PE=1 SV=2	5	2	4	2	1	331	37.6	6.44	0	4.54	2	2	0	309.94	306.72	4.28	4.99	300.1	302.7	307.9	308.9	330.1	322.3	322.1	289.1	305.5	294.6	High	High	High	High	High	High	High	High	High	High	High		0		0.989611	0.785254
Q8C6B9	Active regulator of SIRT1 OS=Mus musculus OX=10090 GN=Rps19bp1 PE=1 SV=1	4	1	5	1	1	143	16	10.83		9.85		1	0	#DIV/0!	#DIV/0!													Medium	Medium	Medium	Medium	Medium	Medium	Medium	Medium	Medium	Medium	Medium		0		#DIV/0!	#DIV/0!
Q9CR21	Acyl carrier protein, mitochondrial OS=Mus musculus OX=10090 GN=Ndufab1 PE=1 SV=1	25	5	386	5	1	156	17.4	5.21	3649	913.38	4	5	0	34685.8	36479.3	5.65	2.77	34086.6	33621.2	36823.8	32563.1	36334.2	36940.5	37969.6	35611.4	35543.2	36331.7	High	High	High	High	High	High	High	High	High	High	High	Oxidation [P141]	0		1.05171	0.15738
Q8R146	Acylamino-acid-releasing enzyme OS=Mus musculus OX=10090 GN=Apeh PE=1 SV=3	38	22	104	22	1	732	81.5	5.59	1020	230.84	21	21	0	8059.44	8076.24	3.21	1.21	8521.3	7928.3	8141.1	7856	7850.5	8060.5	8218	8099.3	8057.1	7946.3	High	High	High	High	High	High	High	High	High	High	High		0		1.00208	0.904558
Q9Z0R9	Acyl-CoA 6-desaturase OS=Mus musculus OX=10090 GN=Fads2 PE=1 SV=1	5	1	1	1	1	444	52.4	8.82	0		1		0	#DIV/0!	#DIV/0!													High	High	High	High	High	High	High	High	High	High	High	Oxidation [P19]	1	Oxidation [P19]	#DIV/0!	#DIV/0!
Q80XL6	Acyl-CoA dehydrogenase family member 11 OS=Mus musculus OX=10090 GN=Acad11 PE=1 SV=2	13	11	23	11	1	779	87.3	8.43	226	48.1	10	11	0	1354	1460.18	10.6	3.55	1191.6	1544	1432.3	1340.8	1261.3	1471.1	1374.2	1502.7	1454.9	1498	High	High	High	High	High	High	High	High	High	High	High		0		1.07842	0.249726
Q8JZN5	Acyl-CoA dehydrogenase family member 9, mitochondrial OS=Mus musculus OX=10090 GN=Acad9 PE=1 SV=2	44	28	211	28	1	625	68.7	7.46	1784	407.73	28	28	0	23300.2	23313.2	2.91	4.3	22102.1	24148.8	23618.6	23454.3	23177.3	23716.6	24835.2	22617.5	22308.3	23088.3	High	High	High	High	High	High	High	High	High	High	High		0		1.00056	0.981297
Q8VCW8	Acyl-CoA synthetase family member 2, mitochondrial OS=Mus musculus OX=10090 GN=Acsf2 PE=1 SV=1	40	19	100	19	1	615	67.9	8.18	1015	231.38	19	19	0	10850.9	10296.2	8.37	19.72	10808.8	10289.8	10174.3	12117.9	10863.9	9079.7	9180.7	9681.6	13897.1	9641.8	High	High	High	High	High	High	High	High	High	High	High		0		0.948874	0.418555
Q3URE1	Acyl-CoA synthetase family member 3, mitochondrial OS=Mus musculus OX=10090 GN=Acsf3 PE=1 SV=2	42	20	80	20	1	583	65	8.02	603	166.94	17	20	0	8000.54	8260.76	2.61	3.72	8035.8	7748.6	7961.7	7910.5	8346.1	8408.5	8142.4	8121	8713.2	7918.7	High	High	High	High	High	High	High	High	High	High	High		0		1.03253	0.265068
Q91YX5	Acyl-CoA:lysophosphatidylglycerol acyltransferase 1 OS=Mus musculus OX=10090 GN=Lpgat1 PE=1 SV=1	11	4	10	4	1	370	43.1	8.79	73	14.21	4	4	0	386.72	424.02	7.49	10.79	343.5	400	385.8	377.7	426.6	370.4	436.9	398.9	421.4	492.5	High	High	High	High	High	High	High	High	High	High	High		0		1.09645	0.0133373
Q5XG73	Acyl-CoA-binding domain-containing protein 5 OS=Mus musculus OX=10090 GN=Acbd5 PE=1 SV=1	6	2	4	2	1	508	56.6	5.41	73	10.81	2	2	0	276.66	253.5	8.11	6.28	247.5	302.3	297.3	282	254.2	276.9	261.4	242.5	249.5	237.2	High	High	High	High	High	High	High	High	High	High	High		0		0.916287	0.18539
Q4VWZ5	Acyl-CoA-binding protein OS=Mus musculus OX=10090 GN=Dbi PE=1 SV=1	45	7	102	7	1	135	15.2	9.13		508.71		7	0	28762.3	25983.5	8.02	8.61	31265.9	24694.5	28779.9	29854.6	29216.4	28580.8	26772.9	26317.6	22444.9	25801.3	High	High	High	High	High	High	High	High	High	High	High		0		0.903389	0.139395
D3Z7X0	Acyl-Coenzyme A dehydrogenase family, member 12 OS=Mus musculus OX=10090 GN=Acad12 PE=1 SV=1	43	29	115	29	1	555	61.4	9.36		463.04		29	0	22787.3	22800.6	9.03	14.56	25104.7	20630.8	21947.5	20925.7	25327.9	19702.4	20300.5	28106.9	23004.7	22888.5	High	High	High	High	High	High	High	High	High	High	High	Oxidation [P188; P190]	2	Oxidation [P188; P190]	1.00058	0.99494
A0A0R4J0P1	Acyl-Coenzyme A dehydrogenase family, member 8 OS=Mus musculus OX=10090 GN=Acad8 PE=1 SV=1	45	16	45	16	1	413	45.1	8.02		165.95		16	0	10602.2	9755.32	6.92	9.31	10443.7	10622.5	9468	11062.4	11414.2	8749.1	9221.2	9844.3	11166.8	9795.2	High	High	High	High	High	High	High	High	High	High	High		0		0.920126	0.132039
Q8BGA8	Acyl-coenzyme A synthetase ACSM5, mitochondrial OS=Mus musculus OX=10090 GN=Acsm5 PE=1 SV=1	26	10	26	10	1	578	64.3	7.72	292	63.3	9	10	0	828.98	802.16	11.33	55.32	919.5	743.8	812	749.4	920.2	547.8	569.1	675	1590.9	628	High	High	High	High	High	High	High	High	High	High	High		0		0.967647	0.909285
O55137	Acyl-coenzyme A thioesterase 1 OS=Mus musculus OX=10090 GN=Acot1 PE=1 SV=1	55	22	239	7	1	419	46.1	6.58	1914	460.39	22	22	0	2079.78	1611.18	5.61	5.19	1925	2064.1	2143	2232.7	2034.1	1637	1615.2	1513.4	1732.8	1557.5	High	High	High	High	High	High	High	High	High	High	High	Oxidation [P18]	1	Oxidation [P18]	0.774688	0.00102377
Q8VHQ9	Acyl-coenzyme A thioesterase 11 OS=Mus musculus OX=10090 GN=Acot11 PE=1 SV=1	3	2	4	2	1	594	67.3	6.8	26	5.92	2	2	0	115.62	112.18	14.81	15.59	104.6	136.2	99.5	136.8	101	127.3	96	97.7	134.1	105.8	High	High	High	High	High	High	High	High	High	High	High		0		0.970247	0.75428
Q9CQR4	Acyl-coenzyme A thioesterase 13 OS=Mus musculus OX=10090 GN=Acot13 PE=1 SV=1	81	10	250	10	1	140	15.2	8.82	1729	432.33	10	9	0	35578.8	37045.7	2.63	7.99	35291.9	36680.9	33988.4	36058.3	35874.5	37598.3	34719.6	41884.4	34741.9	36284.5	High	High	High	High	High	High	High	High	High	High	High		0		1.04123	0.453806
Q9QYR9	Acyl-coenzyme A thioesterase 2, mitochondrial OS=Mus musculus OX=10090 GN=Acot2 PE=1 SV=2	67	27	449	12	1	453	49.6	7.36	4155	940.51	27	27	15	41129.2	35751.6	1.53	3.23	41076.3	40803.6	41124.7	40706.1	41935.2	36264	36513.2	34250	36915.9	34815.1	High	High	High	High	High	High	High	High	High	High	High	Oxidation [P59; P118; P127; P130]	0		0.869252	0.00139784
P58137	Acyl-coenzyme A thioesterase 8 OS=Mus musculus OX=10090 GN=Acot8 PE=1 SV=1	19	6	17	6	1	320	35.8	7.64	128	33.56	5	6	0	1621.42	1583.62	3.61	5.3	1571.3	1577.2	1700.9	1580.2	1677.5	1648.1	1501.4	1677.2	1598.8	1492.6	High	High	High	High	High	High	High	High	High	High	High		0		0.976687	0.443436
Q9R0X4	Acyl-coenzyme A thioesterase 9, mitochondrial OS=Mus musculus OX=10090 GN=Acot9 PE=1 SV=1	45	21	102	21	1	439	50.5	8.59	682	202.24	20	21	0	6462.6	6901.7	4.08	2.48	6031.8	6750	6717.2	6351.1	6462.9	7119.3	6845.9	6742.9	6755.9	7044.5	High	High	High	High	High	High	High	High	High	High	High		0		1.06794	0.0831744
Q3UUI3	Acyl-coenzyme A thioesterase THEM4 OS=Mus musculus OX=10090 GN=Them4 PE=1 SV=1	17	4	7	4	1	230	26	9.64	51	13.84	3	4	0	604.32	604.88	18.77	18.32	486.8	674.8	559.2	778.6	522.2	547.8	490.5	592.5	785.5	608.1	High	High	High	High	High	High	High	High	High	High	High		0		1.00093	0.991264
Q9ESW4	Acylglycerol kinase, mitochondrial OS=Mus musculus OX=10090 GN=Agk PE=1 SV=1	39	15	94	15	1	421	46.9	8.4	1001	202.04	15	15	0	9514.3	9524.04	2.89	4.64	9235.2	9950.3	9710.7	9300.1	9375.2	9648.2	10230.7	9129.7	9213.3	9398.3	High	High	High	High	High	High	High	High	High	High	High	Oxidation [P56]	1	Oxidation [P56]	1.00102	0.957653
O35298	Acyloxyacyl hydrolase OS=Mus musculus OX=10090 GN=Aoah PE=1 SV=1	3	1	3	1	1	574	65.1	6.98	0	5.6	1	1	0	45.64	47.92	12.12	5.85	43.5	44.4	55.7	40.9	43.7	43.3	48.4	50.8	48.6	48.5	High	High	High	High	High	High	High	High	High	High	High		0		1.04996	0.357657
P56376	Acylphosphatase-1 OS=Mus musculus OX=10090 GN=Acyp1 PE=1 SV=2	71	8	32	8	1	99	11.2	9.04	228	55.99	7	8	0	3484.78	3613.68	5.68	5.53	3523.3	3225.7	3678.6	3440.9	3555.4	3586	3548	3886	3344.5	3703.9	High	High	High	High	High	High	High	High	High	High	High		0		1.03699	0.141023
P56375	Acylphosphatase-2 OS=Mus musculus OX=10090 GN=Acyp2 PE=1 SV=2	57	6	146	6	1	106	11.9	9.26	758	208.31	6	6	0	18822.9	18380.5	5.76	6.66	19942.7	17432.9	18937.9	17772.7	20028.3	17280.4	17647.1	18598.8	20391.2	17985.1	High	High	High	High	High	High	High	High	High	High	High		0		0.976498	0.659148
P97823	Acyl-protein thioesterase 1 OS=Mus musculus OX=10090 GN=Lypla1 PE=1 SV=1	34	8	65	8	1	230	24.7	6.62	713	125.54	7	8	0	9483.6	9424.52	1.46	3.31	9372.9	9479.9	9517.5	9714.9	9332.8	9607.9	9073.1	9862.6	9336.4	9242.6	High	High	High	High	High	High	High	High	High	High	High	Oxidation [P178]	1	Oxidation [P178]	0.99377	0.720609
Q9WTL7	Acyl-protein thioesterase 2 OS=Mus musculus OX=10090 GN=Lypla2 PE=1 SV=1	32	8	33	8	1	231	24.8	7.23	303	64.11	8	8	0	3515.18	3398.18	9.57	6.27	3100.4	3849.6	3427.4	3900.1	3298.4	3437.7	3114.4	3310.5	3700	3428.3	High	High	High	High	High	High	High	High	High	High	High	Oxidation [P177]	0		0.966716	0.553581
Q8R0F8	Acylpyruvase FAHD1, mitochondrial OS=Mus musculus OX=10090 GN=Fahd1 PE=1 SV=2	60	13	106	13	1	227	25.2	7.69	1035	223.64	12	13	0	8588.1	12147.2	3.26	2.42	8350.3	8771.7	8923.7	8469.7	8425.1	11657.4	12451.9	12236.5	12212.9	12177.5	High	High	High	High	High	High	High	High	High	High	High		0		1.41443	4.10324e-06
Q64010	Adapter molecule crk OS=Mus musculus OX=10090 GN=Crk PE=1 SV=1	55	17	83	17	1	304	33.8	5.55	874	175.34	17	17	0	5787.54	5918.52	2.27	3.87	5936.6	5816.4	5890.6	5566.9	5727.2	6317	5890.3	5845.2	5783.5	5756.6	High	High	High	High	High	High	High	High	High	High	High		0		1.02263	0.1581
Q9D1J1	Adaptin ear-binding coat-associated protein 2 OS=Mus musculus OX=10090 GN=Necap2 PE=1 SV=1	12	2	4	2	1	266	28.6	7.94	75	8.7	2	2	0	488.62	481.78	9.46	7	431.1	512.8	457.4	554.3	487.5	520.4	450.2	458.6	516.3	463.4	High	High	High	High	High	High	High	High	High	High	High		0		0.986001	0.806634
P08030	Adenine phosphoribosyltransferase OS=Mus musculus OX=10090 GN=Aprt PE=1 SV=2	48	8	30	8	1	180	19.7	6.79	159	59.08	8	8	0	2293.24	2559.92	6.91	4.55	2445.4	2283.3	2413.2	2016.4	2307.9	2586.4	2459.6	2611.4	2428.7	2713.5	High	High	High	High	High	High	High	High	High	High	High		0		1.11629	0.0105364
Q9Z1K7	Adenomatous polyposis coli protein 2 OS=Mus musculus OX=10090 GN=Apc2 PE=1 SV=1	1	3	19	2	1	2274	243	8.88	19	16.96	2	3	0	#DIV/0!	#DIV/0!													High	High	High	High	High	High	High	High	High	High	High	Oxidation [P334]	1	Oxidation [P334]	#DIV/0!	#DIV/0!
Q91ZN5	Adenosine 3'-phospho 5'-phosphosulfate transporter 1 OS=Mus musculus OX=10090 GN=Slc35b2 PE=1 SV=1	2	1	2	1	1	431	47.3	9.29	29	3.66	1	1	0	187	190.04	11.05	8.26	148.9	188.1	205.4	188.6	204	192.6	202.6	163.5	190.7	200.8	High	High	High	High	High	High	High	High	High	High	High		0		1.01626	0.837168
P03958	Adenosine deaminase OS=Mus musculus OX=10090 GN=Ada PE=1 SV=3	4	1	2	1	1	352	40	5.72	0	3.61	1	1	0	115.52	141.8	11.88	17.07	114.2	118.7	133.1	110.4	101.2	127.3	139.4	130.5	127.6	184.2	High	High	High	High	High	High	High	High	High	High	High		0		1.22749	0.148935
P55264	Adenosine kinase OS=Mus musculus OX=10090 GN=Adk PE=1 SV=2	42	17	149	17	1	361	40.1	6.21	842	319.83	16	17	0	19802.6	18331.2	2.98	3.66	20940.9	19308.5	19507.1	19471.6	19785.1	18327.8	19081	17949.3	18864.8	17433.1	High	High	High	High	High	High	High	High	High	High	High	Oxidation [P135]	0		0.925695	0.0347192
Q60612	Adenosine receptor A1 OS=Mus musculus OX=10090 GN=Adora1 PE=2 SV=4	2	1	2	1	1	326	36.6	8.48	0	2.48	1	1	0	#DIV/0!	#DIV/0!													High	High	High	High	High	High	High	High	High	High	High		0		#DIV/0!	#DIV/0!
P50247	Adenosylhomocysteinase OS=Mus musculus OX=10090 GN=Ahcy PE=1 SV=3	53	18	98	18	1	432	47.7	6.54	862	194.08	18	18	0	7339.04	7283.1	3.67	1.44	7619.4	7266.8	7675.8	6996.8	7136.4	7397.2	7220.1	7303.5	7137.1	7357.6	High	High	High	High	High	High	High	High	High	High	High	Oxidation [P30]	1	Oxidation [P30]	0.992378	0.638594
Q01341	Adenylate cyclase type 6 OS=Mus musculus OX=10090 GN=Adcy6 PE=1 SV=1	8	7	25	7	1	1165	130.2	7.87	155	55.91	7	7	0	1048.38	1067.8	10.08	7.82	963.4	1232.3	1073.6	953	1019.6	1063.4	1136.8	926.4	1097.6	1114.8	High	High	High	High	High	High	High	High	High	High	High		0		1.01852	0.757308
P51830	Adenylate cyclase type 9 OS=Mus musculus OX=10090 GN=Adcy9 PE=1 SV=1	2	2	2	2	1	1353	150.9	7.21		2.55		2	0	176.76	158.74	8.66	8.11	159.9	193.5	169.1	183.2	178.1	141.2	165	151.7	174.9	160.9	High	High	High	High	High	High	High	High	High	High	High		0		0.898054	0.00493709
F7BP55	Adenylate kinase 2, mitochondrial (Fragment) OS=Mus musculus OX=10090 GN=Ak2 PE=1 SV=1	88	6	48	1	1	72	7.4	8.94		156.41		6	0	205.82	217.82	4.12	6.38	207.6	205.8	199.7	211.8	204.2	194.6	215.2	224.7	226.3	228.3	High	High	High	High	High	High	High	High	High	High	High	Oxidation [P21]	1	Oxidation [P21]	1.0583	0.157202
Q9WTP6	Adenylate kinase 2, mitochondrial OS=Mus musculus OX=10090 GN=Ak2 PE=1 SV=5	73	18	253	13	1	239	26.5	7.39	2093	439.52	17	16	7	28783.6	30072	1.55	3.28	28494.9	28978.4	28354.7	29562.9	28527.3	29750.1	29517.4	30158.1	31725.4	29209.1	High	High	High	High	High	High	High	High	High	High	High	Oxidation [P24]	0		1.04476	0.0146645
Q9WUR9	Adenylate kinase 4, mitochondrial OS=Mus musculus OX=10090 GN=Ak4 PE=1 SV=1	41	6	21	6	1	223	25	7.53	201	45.3	5	6	0	3315.98	2786.34	24.89	21.81	2569.8	4064.4	2637.6	4341	2967.1	2341.2	2388.6	2825.7	3819.1	2557.1	High	High	High	High	High	High	High	High	High	High	High		0		0.840276	0.163724
Q9R0Y5	Adenylate kinase isoenzyme 1 OS=Mus musculus OX=10090 GN=Ak1 PE=1 SV=1	85	20	808	19	1	194	21.5	5.81	7016	1416.3	20	20	1	96383.3	88668.8	2.54	3.5	94560.5	98790.2	97232.3	96542.7	94790.8	89171.3	88225.1	91729.9	83662	90555.7	High	High	High	High	High	High	High	High	High	High	High		0		0.91996	0.0103326
Q920P5	Adenylate kinase isoenzyme 5 OS=Mus musculus OX=10090 GN=Ak5 PE=1 SV=2	3	2	54	1	1	562	63.3	5.29	67	52.1	2	2	0	#DIV/0!	#DIV/0!													High	High	High	High	High	High	High	High	High	High	High		0		#DIV/0!	#DIV/0!
P54822	Adenylosuccinate lyase OS=Mus musculus OX=10090 GN=Adsl PE=1 SV=2	46	20	158	20	1	484	54.8	7.27	1228	344.03	20	19	0	16628.6	17408.3	2.83	3.88	16668.4	16859.2	17135.3	16149.4	16330.8	18122.6	17801.4	17328.9	16335.7	17452.8	High	High	High	High	High	High	High	High	High	High	High		0		1.04689	0.0374764
P28650	Adenylosuccinate synthetase isozyme 1 OS=Mus musculus OX=10090 GN=Adssl1 PE=1 SV=2	61	25	183	22	1	457	50.2	8.43	1861	403.54	25	25	4	13822.9	14965.8	3.85	4.43	14067.4	13773.6	14199.2	12988	14086.5	14530.1	14557.5	15795.3	14375.6	15570.6	High	High	High	High	High	High	High	High	High	High	High		0		1.08268	0.00660219
P46664	Adenylosuccinate synthetase isozyme 2 OS=Mus musculus OX=10090 GN=Adss PE=1 SV=2	22	9	23	6	1	456	50	6.38	191	38.92	7	8	0	700.72	712.56	1.96	3.97	709.7	702.3	701.9	701.7	688	736.3	735.8	667.1	707.5	716.1	High	High	High	High	High	High	High	High	High	High	High		0		1.0169	0.399771
P40124	Adenylyl cyclase-associated protein 1 OS=Mus musculus OX=10090 GN=Cap1 PE=1 SV=4	44	16	74	15	1	474	51.5	7.52	866	196.01	13	16	0	5192.62	5476.74	9.9	7.32	4796.8	5929.3	5145.1	5581.4	4510.5	5718.5	5079.3	5019	5904.7	5662.2	High	High	High	High	High	High	High	High	High	High	High		0		1.05472	0.47597
Q9CYT6	Adenylyl cyclase-associated protein 2 OS=Mus musculus OX=10090 GN=Cap2 PE=1 SV=1	43	19	87	18	1	476	52.8	6.43	959	196.44	19	19	0	5607.88	5566.82	17.55	11.91	4578.6	7032	5225.1	6488.7	4715	5561.4	4674.1	5194.4	6291.2	6113	High	High	High	High	High	High	High	High	High	High	High		0		0.992678	0.952833
A2BDX3	Adenylyltransferase and sulfurtransferase MOCS3 OS=Mus musculus OX=10090 GN=Mocs3 PE=1 SV=1	11	4	8	4	1	460	49.3	7.49	48	17.49	4	4	0	125.22	125.92	8.57	9.46	112.9	130.6	122.7	142.7	117.2	121.2	121.8	116.4	123.5	146.7	High	High	High	High	High	High	High	High	High	High	High		0		1.00559	0.937837
G5E8Q8	Adhesion G protein-coupled receptor F5 OS=Mus musculus OX=10090 GN=Adgrf5 PE=1 SV=1	3	4	8	4	1	1348	149.3	7.02	47	12.35	4	4	0	419.84	464.9	7.48	4.6	382.9	391.9	471.9	426.5	426	475.3	454.6	449.8	447.1	497.7	High	High	High	High	High	High	High	High	High	High	High		0		1.10733	0.0923898
Q8JZZ7	Adhesion G protein-coupled receptor L2 OS=Mus musculus OX=10090 GN=Adgrl2 PE=1 SV=3	1	1	2	1	1	1487	166.5	6.71	0	3.41	1	1	0	#DIV/0!	#DIV/0!													High	High	High	High	High	High	High	High	High	High	High		0		#DIV/0!	#DIV/0!
Q9D7N9	Adipocyte plasma membrane-associated protein OS=Mus musculus OX=10090 GN=Apmap PE=1 SV=1	34	11	47	11	1	415	46.4	6.32	316	98.26	11	10	0	4030.2	3970.74	3.5	5.26	4170.4	3867.8	4207.9	3888.4	4016.5	4191.1	3985.6	3782.7	4158.3	3736	High	High	High	High	High	High	High	High	High	High	High		0		0.985246	0.667016
Q60994	Adiponectin OS=Mus musculus OX=10090 GN=Adipoq PE=1 SV=2	31	7	72	7	1	247	26.8	5.57	732	125.23	7	7	0	7177.4	7705.4	3.65	2.62	7610	7134.8	7292.9	6949.7	6899.6	7643.6	7534.3	8008	7536.8	7804.3	High	High	High	High	High	High	High	High	High	High	High	Oxidation [P65; P98; P101]	0		1.07356	0.023706
P48962	ADP/ATP translocase 1 OS=Mus musculus OX=10090 GN=Slc25a4 PE=1 SV=4	73	30	2703	18	1	298	32.9	9.72	15467	4233.16	27	29	21	366070	384877	2.96	3.91	348304	365385	363650	375908	377101	385825	397724	398158	361408	381270	High	High	High	High	High	High	High	High	High	High	High		0		1.05138	0.140591
P51881	ADP/ATP translocase 2 OS=Mus musculus OX=10090 GN=Slc25a5 PE=1 SV=3	64	21	1588	9	1	298	32.9	9.73	6848	2152.77	21	21	0	31111.8	32463.9	3.79	6.54	29081.6	32341.5	31566.3	31979.9	30589.9	33869.7	35046.2	32474.3	29628.5	31300.6	High	High	High	High	High	High	High	High	High	High	High		0		1.04346	0.316625
Q3V132	ADP/ATP translocase 4 OS=Mus musculus OX=10090 GN=Slc25a31 PE=1 SV=1	12	4	383	1	1	320	35.2	9.58	1875	566.29	4	4	0	2559.12	2714.88	3.43	4.66	2504.9	2614	2702.3	2504.5	2469.9	2747.6	2824.2	2675.2	2812.2	2515.2	High	High	High	High	High	High	High	High	High	High	High		0		1.06086	0.0686182
Q8VDL4	ADP-dependent glucokinase OS=Mus musculus OX=10090 GN=Adpgk PE=1 SV=2	12	4	10	4	1	496	53.9	5.62	177	23.43	4	4	0	287.5	278.66	3.9	2.62	278.2	289.4	296.8	279	294.1	285.7	275.6	268.5	277.7	285.8	High	High	High	High	High	High	High	High	High	High	High		0		0.969252	0.216583
Q8CG72	ADP-ribose glycohydrolase ARH3 OS=Mus musculus OX=10090 GN=Adprhl2 PE=1 SV=1	24	8	21	8	1	370	39.4	4.96	147	37.35	7	8	0	1115.84	1095.34	2.51	3.78	1151	1125.2	1135.6	1090.7	1076.7	1108.5	1139.7	1077.5	1032.9	1118.1	High	High	High	High	High	High	High	High	High	High	High		0		0.981628	0.37238
Q922B1	ADP-ribose glycohydrolase MACROD1 OS=Mus musculus OX=10090 GN=Macrod1 PE=1 SV=2	53	16	119	16	1	323	35.3	8.85	1147	230.15	16	16	0	14034.5	14277.3	14.34	12.35	10622.6	14625.5	13405.4	16192.3	15326.5	12759.7	12997.5	14527.6	17160.7	13941.1	High	High	High	High	High	High	High	High	High	High	High		0		1.0173	0.760141
Q8R5F3	ADP-ribose glycohydrolase OARD1 OS=Mus musculus OX=10090 GN=Oard1 PE=1 SV=2	6	1	2	1	1	152	17.1	8.53	0	2.03	1	1	0	83.52	91.3	9.67	11.17	81.2	89.3	95.4	75.7	76	96.6	88	77.8	89	105.1	High	High	High	High	High	High	High	High	High	High	High		0		1.09315	0.384131
Q8BVU5	ADP-ribose pyrophosphatase, mitochondrial OS=Mus musculus OX=10090 GN=Nudt9 PE=1 SV=1	21	9	26	9	1	350	38.6	6.76	127	41.44	7	9	0	1961.38	1900.86	0.98	3.65	1980.9	1972.4	1942.3	1952.2	1959.1	1956.6	1928.5	1806.1	1962.9	1850.2	High	High	High	High	High	High	High	High	High	High	High		0		0.969144	0.0895956
P56528	ADP-ribosyl cyclase/cyclic ADP-ribose hydrolase 1 OS=Mus musculus OX=10090 GN=Cd38 PE=1 SV=2	16	4	13	4	1	304	34.4	8.29	47	20.17	3	3	0	719.9	762.22	2.19	5.27	712.1	702.6	748.4	713.5	722.9	819	762.7	775.3	709.7	744.4	High	High	High	High	High	High	High	High	High	High	High		0		1.05879	0.0908738
Q8BSL7	ADP-ribosylation factor 2 OS=Mus musculus OX=10090 GN=Arf2 PE=1 SV=2	57	8	145	4	1	181	20.7	6.58	1052	273.11	8	8	0	10909.3	11163.3	3.1	4.64	10604	10924.5	11470.5	11005.4	10541.9	11289.1	10319.3	11133.6	11714	11360.6	High	High	High	High	High	High	High	High	High	High	High		0		1.02329	0.444621
P61750	ADP-ribosylation factor 4 OS=Mus musculus OX=10090 GN=Arf4 PE=1 SV=2	57	8	47	3	1	180	20.4	7.14	417	89.97	8	8	0	531.66	524.04	15.65	15.49	487.7	619.2	506.6	623.2	421.6	575.9	425	479.6	631.9	507.8	High	High	High	High	High	High	High	High	High	High	High		0		0.985668	0.889935
P84084	ADP-ribosylation factor 5 OS=Mus musculus OX=10090 GN=Arf5 PE=1 SV=2	63	9	63	4	1	180	20.5	6.79	574	119.15	9	9	6	9091.12	9070.5	3.67	4.82	8801.2	9329.1	9189.6	9515.2	8620.5	9158.4	8605.7	8929.4	9768.4	8890.6	High	High	High	High	High	High	High	High	High	High	High		0		0.997732	0.925295
P62331	ADP-ribosylation factor 6 OS=Mus musculus OX=10090 GN=Arf6 PE=1 SV=2	18	3	10	2	1	175	20.1	8.95	57	18.71	3	3	0	#DIV/0!	#DIV/0!													High	High	High	High	High	High	High	High	High	High	High		0		#DIV/0!	#DIV/0!
Q9EPJ9	ADP-ribosylation factor GTPase-activating protein 1 OS=Mus musculus OX=10090 GN=Arfgap1 PE=1 SV=2	39	13	37	13	1	414	45.3	5.57	399	75.81	12	12	0	2460.32	2507.8	3.45	4.96	2476.6	2392.8	2594.2	2436.6	2401.4	2643.5	2603	2328.6	2460.8	2503.1	High	High	High	High	High	High	High	High	High	High	High		0		1.0193	0.603489
Q99K28	ADP-ribosylation factor GTPase-activating protein 2 OS=Mus musculus OX=10090 GN=Arfgap2 PE=1 SV=1	10	5	10	5	1	520	56.6	8.18	103	20.59	5	5	0	609.96	611.4	10.84	5.29	543.8	628.9	607	724.2	545.9	617.6	620.8	554.9	628.3	635.4	High	High	High	High	High	High	High	High	High	High	High		0		1.00236	0.969719
Q8R0H9	ADP-ribosylation factor-binding protein GGA1 OS=Mus musculus OX=10090 GN=Gga1 PE=1 SV=1	8	4	9	3	1	635	69.9	5.27	73	16.69	3	4	0	65.92	66.94	18.56	5.64	48.6	71.1	80.4	75.1	54.4	64.5	66.5	67	73.2	63.5	High	High	High	High	High	High	High	High	High	High	High		0		1.01547	0.853242
Q6P5E6	ADP-ribosylation factor-binding protein GGA2 OS=Mus musculus OX=10090 GN=Gga2 PE=1 SV=1	7	3	6	2	1	603	66	7.3	113	11.85	3	3	0	45.64	46.28	17.77	17.97	44.8	58.1	51	37.9	36.4	56.5	34.3	42.6	49	49	High	High	High	High	High	High	High	High	High	High	High		0		1.01402	0.933981
Q8BMI3	ADP-ribosylation factor-binding protein GGA3 OS=Mus musculus OX=10090 GN=Gga3 PE=1 SV=2	3	2	4	1	1	718	77.9	5.66	32	5.34	2	2	0	9.12	8.92	23.88	6.45	5.6	11.9	10.8	8.1	9.2	9.3	8.2	8.6	8.8	9.7	High	High	High	High	High	High	High	High	High	High	High		0		0.97807	0.883391
G5E8V9	ADP-ribosylation factor-interacting protein 1 OS=Mus musculus OX=10090 GN=Arfip1 PE=1 SV=1	29	9	10	8	1	373	41.5	6.76		39.5		9	0	1613.74	1942.64	12.43	32.01	1544.1	1972.1	1664.5	1480.8	1407.2	1800.4	1449.8	1530.5	1934.6	2997.9	High	High	High	High	High	High	High	High	High	High	High		0		1.20381	0.409275
P61211	ADP-ribosylation factor-like protein 1 OS=Mus musculus OX=10090 GN=Arl1 PE=1 SV=1	31	5	36	5	1	181	20.4	5.72	354	61.4	5	5	0	1063.46	1091.3	4.51	6.18	1019	1029.2	1137.8	1094.2	1037.1	1108.1	1017	1084.2	1195.2	1052	High	High	High	High	High	High	High	High	High	High	High		0		1.02618	0.400011
Q6P3A9	ADP-ribosylation factor-like protein 11 OS=Mus musculus OX=10090 GN=Arl11 PE=2 SV=1	9	2	8	1	1	176	19.2	5.34	40	11.63	2	2	0	337.58	324.7	14.02	10.85	268.5	385.3	347.6	388	298.5	286.2	307.9	336.4	379	314	High	High	High	High	High	High	High	High	High	High	High		0		0.961846	0.49574
Q8BGR6	ADP-ribosylation factor-like protein 15 OS=Mus musculus OX=10090 GN=Arl15 PE=1 SV=1	6	1	3	1	1	204	22.9	5.29	0	2.39	1	1	0	21.6	21.6	19.17	12.47	16.6	28.3	23.9	19.7	19.5	21.2	18.5	20.1	22.6	25.6	High	High	High	High	High	High	High	High	High	High	High		0		1	1
Q9D0J4	ADP-ribosylation factor-like protein 2 OS=Mus musculus OX=10090 GN=Arl2 PE=1 SV=1	5	1	2	1	1	184	20.9	5.96	28	3.77	1	1	0	#DIV/0!	#DIV/0!													High	High	High	High	High	High	High	High	High	High	High		0		#DIV/0!	#DIV/0!
Q9WUL7	ADP-ribosylation factor-like protein 3 OS=Mus musculus OX=10090 GN=Arl3 PE=1 SV=1	47	7	21	7	1	182	20.5	7.24	183	42.04	7	6	0	1268.46	1389.62	4.11	8.49	1275	1326.1	1282.4	1267.8	1191	1473.3	1216.4	1323	1436.2	1499.2	High	High	High	High	High	High	High	High	High	High	High		0		1.09552	0.166544
O88848	ADP-ribosylation factor-like protein 6 OS=Mus musculus OX=10090 GN=Arl6 PE=1 SV=1	17	2	6	2	1	186	20.9	8.25	98	12.44	2	2	0	269.16	332.52	10.06	7.46	256.1	289.6	309.9	254.3	235.9	312.7	347.2	313.3	369.1	320.3	High	High	High	High	High	High	High	High	High	High	High		0		1.2354	0.0261592
Q9JKW0	ADP-ribosylation factor-like protein 6-interacting protein 1 OS=Mus musculus OX=10090 GN=Arl6ip1 PE=1 SV=1	4	1	2	1	1	203	23.4	9.32	28	3.36	1	1	0	151	139.46	11.9	13.68	154.1	128.3	165.1	137.3	170.2	118.5	135.1	126.5	151.7	165.5	High	High	High	High	High	High	High	High	High	High	High		0		0.923576	0.34861
Q8VEH3	ADP-ribosylation factor-like protein 8A OS=Mus musculus OX=10090 GN=Arl8a PE=1 SV=1	56	8	40	2	1	186	21.4	7.77	236	88.68	7	8	0	596.4	596.14	5.64	7	649.8	599	568.5	586.4	578.3	607.7	580.9	549.2	661	581.9	High	High	High	High	High	High	High	High	High	High	High		0		0.999564	0.990281
Q9CQW2	ADP-ribosylation factor-like protein 8B OS=Mus musculus OX=10090 GN=Arl8b PE=1 SV=1	60	9	52	3	1	186	21.5	8.43	301	114.06	8	9	4	4598.94	4460.06	3.06	8.31	4679.2	4322.1	4674.7	4663.1	4655.6	4220.7	4197.7	4408	5102.2	4371.7	High	High	High	High	High	High	High	High	High	High	High		0		0.969802	0.417911
Q8BXL7	ADP-ribosylation factor-related protein 1 OS=Mus musculus OX=10090 GN=Arfrp1 PE=1 SV=2	9	1	2	1	1	201	22.6	6.55	83	6.56	1	1	0	113.22	126.76	16.41	4.34	77.3	125.7	114.6	128.5	120	125.2	121.2	122.4	133.9	131.1	High	High	High	High	High	High	High	High	High	High	High		0		1.11959	0.205912
Q9JKX6	ADP-sugar pyrophosphatase OS=Mus musculus OX=10090 GN=Nudt5 PE=1 SV=1	20	4	10	4	1	218	24	5.48	114	22.66	4	4	0	408.68	480.68	4.15	13.36	426.3	390.2	404.6	423.9	398.4	567.5	492.6	472.3	387.2	483.8	High	High	High	High	High	High	High	High	High	High	High		0		1.17618	0.0728858
P46656	Adrenodoxin, mitochondrial OS=Mus musculus OX=10090 GN=Fdx1 PE=1 SV=1	25	6	39	6	1	188	20.1	5.62	102	45.98	6	6	0	4043.38	4037.24	4.43	7.51	4131.2	3753	4038.1	4017.7	4276.9	4211.3	4321	3853.5	3595.2	4205.2	High	High	High	High	High	High	High	High	High	High	High		0		0.998481	0.972152
E9Q852	Afadin OS=Mus musculus OX=10090 GN=Afdn PE=1 SV=2	13	18	22	18	1	1805	204.4	6.24		89.43		18	0	1859.58	2058.32	5.32	7.75	1790.4	2038.9	1867.8	1800.1	1800.7	2275.3	2095.5	1887.7	1914.5	2118.6	High	High	High	High	High	High	High	High	High	High	High		0		1.10687	0.0871885
Q3V384	AFG1-like ATPase OS=Mus musculus OX=10090 GN=Afg1l PE=1 SV=1	42	16	77	16	1	480	54.3	8.03	474	157.99	16	16	0	6062.3	5795.26	9.17	4.42	6029.6	6278.7	6270.7	6524.5	5208	5663.9	6205.1	5880.7	5657.7	5568.9	High	High	High	High	High	High	High	High	High	High	High		0		0.955951	0.256758
Q920A7	AFG3-like protein 1 OS=Mus musculus OX=10090 GN=Afg3l1 PE=1 SV=2	24	16	47	11	1	789	87	8.85	434	87.36	16	15	0	1625.3	1629.02	2.07	3.22	1569.9	1636.2	1618.9	1649.4	1652.1	1566.8	1655.1	1577.8	1677.5	1667.9	High	High	High	High	High	High	High	High	High	High	High		0		1.00229	0.777402
Q8JZQ2	AFG3-like protein 2 OS=Mus musculus OX=10090 GN=Afg3l2 PE=1 SV=1	54	47	255	40	1	802	89.5	8.6	2399	521.69	46	46	7	32103.6	32438.8	1.91	3.59	31524.7	32315.9	31631.2	32211.3	32834.7	30511.3	32662	33116.2	33536.1	32368.3	High	High	High	High	High	High	High	High	High	High	High		0		1.01044	0.529877
Q8CG76	Aflatoxin B1 aldehyde reductase member 2 OS=Mus musculus OX=10090 GN=Akr7a2 PE=1 SV=3	49	15	133	15	1	367	40.6	8.12	634	231.44	13	15	0	10625	10252.2	3.97	4.02	11038	10311	10996.2	10097.7	10681.9	9769.3	10440.2	10759.1	10402.7	9889.6	High	High	High	High	High	High	High	High	High	High	High		0		0.964915	0.271186
M0QWP1	Agrin OS=Mus musculus OX=10090 GN=Agrn PE=1 SV=1	9	13	16	13	1	2034	216.5	6.15		70.54		13	0	1546.24	1674.68	3.12	4.45	1558.5	1544	1629.9	1492.4	1506.4	1732.1	1660.2	1641.3	1576.1	1763.7	High	High	High	High	High	High	High	High	High	High	High	Oxidation [P1315]	0		1.08307	0.0364774
O08915	AH receptor-interacting protein OS=Mus musculus OX=10090 GN=Aip PE=1 SV=1	8	2	5	2	1	330	37.6	6.4	82	12.7	1	2	0	203.94	214.5	13.26	10.44	182.8	244.9	207.9	216.9	167.2	230.2	200.6	185.9	241.9	213.9	High	High	High	High	High	High	High	High	High	High	High		0		1.05178	0.601126
E9Q616	AHNAK nucleoprotein (desmoyokin) OS=Mus musculus OX=10090 GN=Ahnak PE=1 SV=1	71	218	570	217	1	5656	603.9	6.3		2372.98		218	1	102839	115730	5.44	6.9	103390	105876	101934	108016	94978.9	127380	118243	109766	106963	116298	High	High	High	High	High	High	High	High	High	High	High	Oxidation [P3118; P24147; P24147; P24154; P24154]	5	Oxidation [P3118; P24147; P24147; P24154; P24154]	1.12535	0.0472742
F7CVJ5	AHNAK nucleoprotein 2 (Fragment) OS=Mus musculus OX=10090 GN=Ahnak2 PE=1 SV=1	55	12	24	1	1	1126	115.2	5.59		111.66		12	0	156.18	168.2	9.23	9.7	167.3	152.4	174	154	133.2	158.7	154.2	165.4	195.9	166.8	High	High	High	High	High	High	High	High	High	High	High		0		1.07696	0.326315
F7DBB3	AHNAK nucleoprotein 2 (Fragment) OS=Mus musculus OX=10090 GN=Ahnak2 PE=1 SV=1	22	13	24	3	1	1576	166.4	5.78		108.61		13	10	4289.82	4657.18	6.5	9.12	4680.2	3972.1	4417.5	4395.6	3983.7	4365.8	4194.1	4686.9	5301.1	4738	High	High	High	High	High	High	High	High	High	High	High		0		1.08564	0.164514
E9PYB0	AHNAK nucleoprotein 2 (Fragment) OS=Mus musculus OX=10090 GN=Ahnak2 PE=1 SV=8	37	12	23	2	1	1738	182.5	7.08		103.46		12	0	192.86	207.86	11.4	7.21	156.8	204.9	213.5	187.3	201.8	226.1	186.3	202.2	216.2	208.5	High	High	High	High	High	High	High	High	High	High	High		0		1.07778	0.397835
O08715	A-kinase anchor protein 1, mitochondrial OS=Mus musculus OX=10090 GN=Akap1 PE=1 SV=4	35	22	70	22	1	857	92.1	5.02	734	195.11	21	22	0	5293.14	4988.42	11.89	7.15	4475.2	6066.3	5118.2	5790.5	5015.5	5556.5	4830.4	4607.8	5062.5	4884.9	High	High	High	High	High	High	High	High	High	High	High		0		0.942431	0.478126
Q9WTQ5	A-kinase anchor protein 12 OS=Mus musculus OX=10090 GN=Akap12 PE=1 SV=1	44	56	178	56	1	1684	180.6	4.44	2061	461.01	53	56	0	13161.7	14625.1	4.64	2.71	13678.4	12970.3	14006.5	12807.5	12345.9	15007.9	14338.2	14128	14636.1	15015.4	High	High	High	High	High	High	High	High	High	High	High		0		1.11119	0.0239907
A0A140LJJ5	A-kinase anchor protein 13 OS=Mus musculus OX=10090 GN=Akap13 PE=1 SV=1	1	2	2	2	1	2794	305.8	5.35		0		2	0	#DIV/0!	#DIV/0!													High	High	High	High	High	High	High	High	High	High	High		0		#DIV/0!	#DIV/0!
D3YVF0	A-kinase anchor protein 5 OS=Mus musculus OX=10090 GN=Akap5 PE=1 SV=2	2	1	2	1	1	745	79.4	4.75	19	4.36	1	1	0	#DIV/0!	#DIV/0!													High	High	High	High	High	High	High	High	High	High	High		0		#DIV/0!	#DIV/0!
Q9DBR0	A-kinase anchor protein 8 OS=Mus musculus OX=10090 GN=Akap8 PE=1 SV=1	9	6	13	6	1	687	76.2	5.14	179	24.38	5	6	0	1028.48	1099.76	9.32	6.6	979.9	1057.7	1174.6	964.1	966.1	1149.8	1086.7	991.5	1181	1089.8	High	High	High	High	High	High	High	High	High	High	High		0		1.06931	0.370835
E9QQ10	A-kinase anchor protein 9 OS=Mus musculus OX=10090 GN=Akap9 PE=1 SV=1	1	4	5	3	1	3779	433.9	5.03		12.86		4	0	538.96	592.4	10.66	14.86	517.2	520.5	638.9	542.7	475.5	585.4	506.8	544.4	738.3	587.1	High	High	High	High	High	High	High	High	High	High	High		0		1.09915	0.34624
D3Z2J4	AKT-interacting protein OS=Mus musculus OX=10090 GN=Aktip PE=1 SV=2	10	2	4	2	1	292	32.9	9.31	0	10.24	1	2	0	219.16	251.86	10.84	14.65	202.5	249.7	240.4	210.2	193	219.3	223.4	233	295.6	288	High	High	High	High	High	High	High	High	High	High	High		0		1.14921	0.252805
P58742	Aladin OS=Mus musculus OX=10090 GN=Aaas PE=1 SV=1	2	1	2	1	1	546	59.4	6.87	34	4.35	1	1	0	#DIV/0!	#DIV/0!													High	High	High	High	High	High	High	High	High	High	High		0		#DIV/0!	#DIV/0!
Q8QZR5	Alanine aminotransferase 1 OS=Mus musculus OX=10090 GN=Gpt PE=1 SV=3	47	18	97	17	1	496	55.1	6.64	1080	217.23	18	18	1	8352.84	8203.58	2.01	5.47	8427.4	8249.5	8461.5	8085.7	8540.1	8320.2	8000.8	7730	8912.9	8054	High	High	High	High	High	High	High	High	High	High	High		0		0.982131	0.60496
Q8BGT5	Alanine aminotransferase 2 OS=Mus musculus OX=10090 GN=Gpt2 PE=1 SV=1	19	9	24	8	1	522	57.9	8	104	44.12	9	9	0	855.94	942.9	5.46	10.84	826.8	924.5	873.5	817.4	837.5	1029	1059.8	882.9	812.7	930.1	High	High	High	High	High	High	High	High	High	High	High		0		1.1016	0.0883439
Q3UEG6	Alanine--glyoxylate aminotransferase 2, mitochondrial OS=Mus musculus OX=10090 GN=Agxt2 PE=1 SV=1	2	1	1	1	1	513	57.1	7.93	0		1		0	#DIV/0!	#DIV/0!													High	High	High	High	High	High	High	High	High	High	High		0		#DIV/0!	#DIV/0!
Q8BGQ7	Alanine--tRNA ligase, cytoplasmic OS=Mus musculus OX=10090 GN=Aars PE=1 SV=1	39	31	106	31	1	968	106.8	5.67	965	221.22	30	31	0	8068.66	7876.8	4.96	3.98	8554.7	7624.3	8474.7	7915.7	7773.9	8033.8	8171.7	7545.5	8103.4	7529.6	High	High	High	High	High	High	High	High	High	High	High		0		0.976222	0.500505
Q14CH7	Alanine--tRNA ligase, mitochondrial OS=Mus musculus OX=10090 GN=Aars2 PE=1 SV=1	18	14	45	14	1	980	106.7	6.18	454	91.57	14	14	0	1607.9	1670.44	3.88	5.58	1582.1	1729.2	1568.6	1587.8	1571.8	1674.5	1685.7	1513.6	1724.7	1753.7	High	High	High	High	High	High	High	High	High	High	High		0		1.0389	0.261001
Q3THG9	Alanyl-tRNA editing protein Aarsd1 OS=Mus musculus OX=10090 GN=Aarsd1 PE=1 SV=2	37	12	41	1	1	412	44.9	6.42	464	94	10	12	0	128.78	124.7	4.39	17.56	129.1	132.6	136.2	119.9	126.1	145.9	145.5	108.7	96.9	126.5	High	High	High	High	High	High	High	High	High	High	High		0		0.968318	0.67663
P00329	Alcohol dehydrogenase 1 OS=Mus musculus OX=10090 GN=Adh1 PE=1 SV=2	31	11	40	11	1	375	39.7	8.1	204	78.11	10	11	0	3229.18	3033.6	7.49	19.23	3704.6	3148.4	3087.5	3165.1	3040.3	3035.1	2524.2	2847.6	4023.2	2737.9	High	High	High	High	High	High	High	High	High	High	High		0		0.939434	0.51876
P28474	Alcohol dehydrogenase class-3 OS=Mus musculus OX=10090 GN=Adh5 PE=1 SV=3	39	15	148	15	1	374	39.5	7.25	774	260.52	15	15	0	19970.8	18749	3.47	3.04	20586.6	19357.1	20759.4	19290.8	19860.2	18283.5	19732.3	18662.2	18609.6	18457.3	High	High	High	High	High	High	High	High	High	High	High	Oxidation [P243]	1	Oxidation [P243]	0.938819	0.0673964
Q571I9	Aldehyde dehydrogenase family 16 member A1 OS=Mus musculus OX=10090 GN=Aldh16a1 PE=1 SV=2	3	2	6	2	1	802	84.7	6.32	54	12.22	2	2	0	172.42	167.76	6.33	2.34	184.3	165.6	177.5	161.3	173.4	166	171.4	171.2	162	168.2	High	High	High	High	High	High	High	High	High	High	High		0		0.972973	0.313429
J3QMK6	Aldehyde dehydrogenase family 3 member B3 OS=Mus musculus OX=10090 GN=Aldh3b3 PE=1 SV=1	3	1	1	1	1	479	53.1	6.34		0		1	0	#DIV/0!	#DIV/0!													High	High	High	High	High	High	High	High	High	High	High		0		#DIV/0!	#DIV/0!
Q9CZS1	Aldehyde dehydrogenase X, mitochondrial OS=Mus musculus OX=10090 GN=Aldh1b1 PE=1 SV=1	48	26	150	23	1	519	57.5	7.02	1415	370.17	26	25	3	14009.5	15009.8	8.45	14.88	15009.9	14608.1	14796	13831.9	11801.5	17033.5	16795.7	11487.9	15199.9	14532.1	High	High	High	High	High	High	High	High	High	High	High	Oxidation [P164]	0		1.0714	0.414123
P47739	Aldehyde dehydrogenase, dimeric NADP-preferring OS=Mus musculus OX=10090 GN=Aldh3a1 PE=1 SV=2	6	3	6	2	1	453	50.4	6.95	53	11.39	3	3	0	84.96	94.98	16.66	16	104.5	67.7	97.5	72.4	82.7	88.2	85.2	80.1	116.5	104.9	High	High	High	High	High	High	High	High	High	High	High		0		1.11794	0.44555
A0A0G2JFQ0	Aldehyde dehydrogenase, mitochondrial (Fragment) OS=Mus musculus OX=10090 GN=Aldh2 PE=1 SV=1	45	9	75	1	1	229	25.5	8.18		304.52		9	0	812.96	808.92	5.91	13.46	878.1	775.5	840.4	776.5	794.3	758.9	739.2	868.5	970.7	707.3	High	High	High	High	High	High	High	High	High	High	High		0		0.995031	0.945427
P47738	Aldehyde dehydrogenase, mitochondrial OS=Mus musculus OX=10090 GN=Aldh2 PE=1 SV=1	58	26	523	16	1	519	56.5	7.62	6550	1269.7	26	25	12	51033.9	47407.4	6.46	8.17	56264.9	52038.6	49141.7	46634.2	51090.2	44382.2	44602.6	49419.7	53298.4	45334.1	High	High	High	High	High	High	High	High	High	High	High		0		0.928939	0.324065
O54754	Aldehyde oxidase 1 OS=Mus musculus OX=10090 GN=Aox1 PE=1 SV=2	4	5	11	5	1	1333	146.6	7.02	51	23.9	5	5	0	635.64	630.62	6.97	6.33	651.3	594.9	699.8	624	608.2	625.6	592.4	689	649.1	597	High	High	High	High	High	High	High	High	High	High	High		0		0.992102	0.582491
Q9JII6	Aldo-keto reductase family 1 member A1 OS=Mus musculus OX=10090 GN=Akr1a1 PE=1 SV=3	54	17	96	16	1	325	36.6	7.39	817	192.54	15	17	1	7417.26	7640.64	5.67	5.21	8084.7	7140.5	7671.3	6908	7281.8	7460.3	7545.5	7297.9	8326.9	7572.6	High	High	High	High	High	High	High	High	High	High	High		0		1.03012	0.564898
G5E895	Aldo-keto reductase family 1, member B10 (aldose reductase) OS=Mus musculus OX=10090 GN=Akr1b10 PE=1 SV=1	59	16	58	9	1	316	35.8	7.28		297.6		16	5	12293.3	12120.6	5.31	4.7	12752.7	12300.9	12708.6	11197.2	12507.3	11818	12221.4	13003	11477.1	12083.7	High	High	High	High	High	High	High	High	High	High	High		0		0.985952	0.497771
G3X9Y6	Aldo-keto reductase family 1, member C19 OS=Mus musculus OX=10090 GN=Akr1c19 PE=1 SV=1	9	2	10	1	1	323	37	7.23		4.44		2	0	28.28	31.02	21.68	15.15	37.7	21.6	33.3	24.2	24.6	37.1	31.8	27.2	33.5	25.5	High	High	High	High	High	High	High	High	High	High	High		0		1.09689	0.425776
Q8K157	Aldose 1-epimerase OS=Mus musculus OX=10090 GN=Galm PE=1 SV=1	25	7	34	7	1	342	37.8	6.74	474	69.78	7	7	0	2149.5	1986.62	7.73	7	2237.5	1905.3	2280.8	2126	2197.9	1820.7	1951.8	2197.4	2027	1936.2	High	High	High	High	High	High	High	High	High	High	High		0		0.924224	0.111931
P45376	Aldose reductase OS=Mus musculus OX=10090 GN=Akr1b1 PE=1 SV=3	67	23	349	22	1	316	35.7	7.18	1873	634.85	22	23	1	36642.1	34863.9	4.51	4.93	37768.7	35439.7	37658.3	35161.1	37182.7	33214.7	34713.8	37773.2	34400.3	34217.3	High	High	High	High	High	High	High	High	High	High	High	Oxidation [P189; P216; P219; P223; P226]	0		0.95147	0.107923
P45377	Aldose reductase-related protein 2 OS=Mus musculus OX=10090 GN=Akr1b8 PE=1 SV=2	48	11	53	4	1	316	36.1	6.37	385	114.59	10	11	0	866.72	1071.72	9.72	15.7	1017	805.4	901.4	802.6	807.2	1037.3	908.6	920.1	1218.5	1274.1	High	High	High	High	High	High	High	High	High	High	High		0		1.23652	0.104726
P09242	Alkaline phosphatase, tissue-nonspecific isozyme OS=Mus musculus OX=10090 GN=Alpl PE=1 SV=2	21	9	25	9	1	524	57.5	7.01	267	53.5	9	9	0	1480.84	1572.86	8.11	21.51	1636	1309.1	1455.1	1466.8	1537.2	1327.8	1386.7	1408.4	2152.6	1588.8	High	High	High	High	High	High	High	High	High	High	High		0		1.06214	0.603346
Q80Y20	Alkylated DNA repair protein alkB homolog 8 OS=Mus musculus OX=10090 GN=Alkbh8 PE=1 SV=1	2	2	3	2	1	664	74.7	7.97	0	4.27	1	2	0	323.06	322.34	9.98	8.93	267	329.2	348.8	357.2	313.1	289.7	303.8	333.5	364.5	320.2	Medium	Medium	Medium	Medium	Medium	Medium	Medium	Medium	Medium	Medium	Medium		0		0.997771	0.937646
Q8C0I1	Alkyldihydroxyacetonephosphate synthase, peroxisomal OS=Mus musculus OX=10090 GN=Agps PE=1 SV=1	16	8	20	8	1	645	71.6	7.5	288	48.71	6	8	0	1233.62	1243.32	7.13	7.83	1231.2	1174.4	1381.7	1169.7	1211.1	1140	1237	1333.5	1350.2	1155.9	High	High	High	High	High	High	High	High	High	High	High		0		1.00786	0.855225
Q64FW2	All-trans-retinol 13,14-reductase OS=Mus musculus OX=10090 GN=Retsat PE=1 SV=3	1	1	1	1	1	609	67.3	8.95		0		1	0	#DIV/0!	#DIV/0!													High	High	High	High	High	High	High	High	High	High	High		0		#DIV/0!	#DIV/0!
Q91VB8	Alpha globin 1 OS=Mus musculus OX=10090 GN=Hba-a1 PE=1 SV=1	62	6	86	1	1	142	15.1	8.22		322.41		6	0	274.56	287.46	32.74	17.54	381.3	309.7	269.5	227.4	184.9	354.2	322.3	276.1	254.7	230	High	High	High	High	High	High	High	High	High	High	High		0		1.04698	0.343191
Q8VDI9	Alpha-1,2-mannosyltransferase ALG9 OS=Mus musculus OX=10090 GN=Alg9 PE=2 SV=1	2	1	2	1	1	611	69.5	8.94	0	2.97	1	1	0	74.32	75.82	6.41	12.75	78.3	66.9	73.3	78.1	75	71.9	83.3	87.9	63.8	72.2	High	High	High	High	High	High	High	High	High	High	High		0		1.02018	0.815421
Q60590	Alpha-1-acid glycoprotein 1 OS=Mus musculus OX=10090 GN=Orm1 PE=1 SV=1	12	2	3	2	1	207	23.9	5.85	0	5.77	1	2	0	140.5	142.02	6.29	9.41	145.6	130.2	148.9	142.6	135.2	133.3	140	145.5	162.9	128.4	High	High	High	High	High	High	High	High	High	High	High		0		1.01082	0.810654
P07758	Alpha-1-antitrypsin 1-1 OS=Mus musculus OX=10090 GN=Serpina1a PE=1 SV=4	32	12	88	3	1	413	46	5.72	1020	198.62	12	12	11	8738.56	8496.86	28.1	36.7	12983.6	5420.9	8581	8687.9	8019.4	5906.4	6420.4	7054.6	9663.9	13439	High	High	High	High	High	High	High	High	High	High	High		0		0.972341	0.911513
P22599	Alpha-1-antitrypsin 1-2 OS=Mus musculus OX=10090 GN=Serpina1b PE=1 SV=2	29	11	87	2	1	413	45.9	5.54	1106	209.11	11	11	0	750.24	790.26	22.6	29.55	1045.1	521.8	748.8	728.4	707.1	624.6	599.5	666	922.5	1138.7	High	High	High	High	High	High	High	High	High	High	High		0		1.05334	0.792644
Q00897	Alpha-1-antitrypsin 1-4 OS=Mus musculus OX=10090 GN=Serpina1d PE=1 SV=1	28	11	85	3	1	413	46	5.44	1132	198.46	11	11	0	758.8	816.4	19.27	31.67	1008.6	560.4	766.6	749	709.4	589.5	655.6	665.6	979.9	1191.4	High	High	High	High	High	High	High	High	High	High	High		0		1.07591	0.724511
Q00898	Alpha-1-antitrypsin 1-5 OS=Mus musculus OX=10090 GN=Serpina1e PE=1 SV=1	28	11	57	4	1	413	45.9	5.73	423	125.66	10	11	0	899.8	777.5	20.33	13.05	1149.6	607.2	911.3	1013.4	817.5	727.6	655.7	746	912.2	846	High	High	High	High	High	High	High	High	High	High	High		0		0.864081	0.222976
A2AKD7	Alpha-1-syntrophin OS=Mus musculus OX=10090 GN=Snta1 PE=1 SV=1	40	18	42	17	1	499	53.2	6.8		178.72		18	0	6460.84	5958.2	5.62	9.17	6001.6	6769.2	6272.3	6987.3	6273.8	5680	5855.6	5845.5	6902.2	5507.7	High	High	High	High	High	High	High	High	High	High	High		0		0.922202	0.0286593
P29699	Alpha-2-HS-glycoprotein OS=Mus musculus OX=10090 GN=Ahsg PE=1 SV=1	16	5	22	5	1	345	37.3	6.51	91	42.19	5	5	0	4022	4055.44	29.42	11.95	4313.2	5728.2	4584	3139.9	2344.7	4373.2	3535	3529.9	4533.8	4305.3	High	High	High	High	High	High	High	High	High	High	High		0		1.00831	0.967231
P55302	Alpha-2-macroglobulin receptor-associated protein OS=Mus musculus OX=10090 GN=Lrpap1 PE=1 SV=1	33	15	54	14	1	360	42.2	7.87	328	104.03	14	15	1	4273.32	4501.6	2.89	6.06	4210.8	4099.4	4450.7	4248.6	4357.1	4905.5	4582.8	4236.1	4263.2	4520.4	High	High	High	High	High	High	High	High	High	High	High		0		1.05342	0.232971
Q7TPR4	Alpha-actinin-1 OS=Mus musculus OX=10090 GN=Actn1 PE=1 SV=1	43	30	131	15	1	892	103	5.38	1554	304.28	28	30	0	1369.6	1620.2	6.47	8.55	1244.9	1443.1	1459	1325.2	1375.8	1728.8	1724.2	1559	1404.9	1684.1	High	High	High	High	High	High	High	High	High	High	High		0		1.18297	0.0280364
Q9JI91	Alpha-actinin-2 OS=Mus musculus OX=10090 GN=Actn2 PE=1 SV=2	62	50	313	39	1	894	103.8	5.45	2756	690.75	48	50	12	25660.7	26141.8	15.26	10.61	22588.4	32809.1	22381.1	23990.8	26534.2	28445	27960.9	22262.1	24141.3	27899.7	High	High	High	High	High	High	High	High	High	High	High		0		1.01875	0.792523
P57780	Alpha-actinin-4 OS=Mus musculus OX=10090 GN=Actn4 PE=1 SV=1	54	46	216	33	1	912	104.9	5.41	2025	473.95	45	45	6	11632.7	13908.3	4.11	10.14	10761	11722.7	12162.3	11578.6	11939.1	15217.2	14881.5	13485.6	11676.5	14280.5	High	High	High	High	High	High	High	High	High	High	High		0		1.19561	0.0383145
Q9QYC0	Alpha-adducin OS=Mus musculus OX=10090 GN=Add1 PE=1 SV=2	14	9	23	9	1	735	80.6	5.9	109	32.8	8	8	0	1648.22	1726.06	17.23	8.91	1684.4	2135.2	1540.6	1530.4	1350.5	1939.8	1675.7	1517.6	1718.7	1778.5	High	High	High	High	High	High	High	High	High	High	High		0		1.04723	0.636673
Q9DBF1	Alpha-aminoadipic semialdehyde dehydrogenase OS=Mus musculus OX=10090 GN=Aldh7a1 PE=1 SV=4	47	20	89	20	1	539	58.8	7.47	967	193.79	19	19	0	8514.62	8328.6	4.52	5.19	9106	8275.7	8361.3	8054.7	8775.4	7878.9	7937.3	8672.9	8851.6	8302.3	High	High	High	High	High	High	High	High	High	High	High		0		0.978153	0.619978
P61164	Alpha-centractin OS=Mus musculus OX=10090 GN=Actr1a PE=1 SV=1	29	12	94	8	1	376	42.6	6.64	502	139.2	11	12	0	3269.88	3324.06	5.76	5.78	3333.3	3536.1	3032.9	3355.2	3091.9	3198.9	3400.7	3062.1	3547.9	3410.7	High	High	High	High	High	High	High	High	High	High	High		0		1.01657	0.578889
P23927	Alpha-crystallin B chain OS=Mus musculus OX=10090 GN=Cryab PE=1 SV=2	57	11	437	11	1	175	20.1	7.33	3849	808.38	11	11	0	44028.5	37265.9	11.14	15.15	48197	34835.8	43657.3	46733.1	46719.5	32715.1	34672.2	36077.4	47087.8	35776.8	High	High	High	High	High	High	High	High	High	High	High	Oxidation [P58]	1	Oxidation [P58]	0.846402	0.0922842
P60840	Alpha-endosulfine OS=Mus musculus OX=10090 GN=Ensa PE=1 SV=1	63	8	32	7	1	121	13.3	7.24	356	69.89	7	8	1	2985.52	2912.72	4.13	3.58	2953.9	2785.2	3131.9	2994.6	3062	3005.9	3041	2823	2818.8	2874.9	High	High	High	High	High	High	High	High	High	High	High		0		0.975616	0.509885
B0QZL1	Alpha-enolase (Fragment) OS=Mus musculus OX=10090 GN=Eno1 PE=1 SV=1	78	13	213	1	1	221	23.9	7.96		1064.11		13	0	2418.5	2524.5	4.05	5.93	2545.3	2283.9	2437.8	2336	2489.5	2407	2393.4	2586.3	2754.5	2481.3	High	High	High	High	High	High	High	High	High	High	High	Oxidation [P36]	1	Oxidation [P36]	1.04383	0.317036
P17182	Alpha-enolase OS=Mus musculus OX=10090 GN=Eno1 PE=1 SV=3	82	29	762	12	1	434	47.1	6.8	8918	1878.31	28	29	18	45148.8	48888.7	4.51	6.42	49040.1	43918.7	44960.8	43245	44579.6	54325.9	46473.7	48675.1	47383.1	47585.9	High	High	High	High	High	High	High	High	High	High	High	Oxidation [P36]	1	Oxidation [P36]	1.08283	0.001394
P46660	Alpha-internexin OS=Mus musculus OX=10090 GN=Ina PE=1 SV=3	5	3	16	2	1	501	55.3	5.4	82	25.55	2	2	0	#DIV/0!	#DIV/0!													High	High	High	High	High	High	High	High	High	High	High		0		#DIV/0!	#DIV/0!
Q8K1E6	Alpha-ketoglutarate-dependent dioxygenase alkB homolog 3 OS=Mus musculus OX=10090 GN=Alkbh3 PE=1 SV=1	10	3	6	3	1	286	33	8.06	63	10.03	3	3	0	321.22	377.8	4.37	6.22	302.6	315.4	341.1	318.8	328.2	396.9	349.6	395.4	354.8	392.3	High	High	High	High	High	High	High	High	High	High	High		0		1.17614	0.00671923
Q9D6Z0	Alpha-ketoglutarate-dependent dioxygenase alkB homolog 7, mitochondrial OS=Mus musculus OX=10090 GN=Alkbh7 PE=1 SV=1	7	2	4	2	1	221	25	6.54	0	4.7	2	2	0	488.48	279.38	4.08	6.6	449.4	496.4	494.6	496.8	505.2	301.7	295.8	259.6	267	272.8	High	High	High	High	High	High	High	High	High	High	High		0		0.571937	0.000226459
Q8BGW1	Alpha-ketoglutarate-dependent dioxygenase FTO OS=Mus musculus OX=10090 GN=Fto PE=1 SV=1	6	2	3	2	1	502	58	5.12	0	5.04	1	2	0	#DIV/0!	#DIV/0!													High	High	High	High	High	High	High	High	High	High	High		0		#DIV/0!	#DIV/0!
Q91W89	Alpha-mannosidase 2C1 OS=Mus musculus OX=10090 GN=Man2c1 PE=1 SV=1	13	10	23	10	1	1039	115.6	6.51	185	49.71	9	10	0	1150.54	1165.92	4.05	5.26	1162.2	1119.3	1216.6	1083.7	1170.9	1119.4	1086.5	1199.4	1236.5	1187.8	High	High	High	High	High	High	High	High	High	High	High		0		1.01337	0.689731
O09174	Alpha-methylacyl-CoA racemase OS=Mus musculus OX=10090 GN=Amacr PE=1 SV=4	50	14	76	14	1	381	41.7	7.4	1031	184.7	14	14	0	5254.7	5317.88	4.65	6.38	5403.1	5182.5	5487.2	4921.5	5279.2	5063.1	5110.7	5892.2	5351.4	5172	High	High	High	High	High	High	High	High	High	High	High	Oxidation [P264]	1	Oxidation [P264]	1.01202	0.698702
Q9QWR8	Alpha-N-acetylgalactosaminidase OS=Mus musculus OX=10090 GN=Naga PE=1 SV=2	14	6	12	6	1	415	47.2	6.44	50	20.53	6	6	0	931.1	1019.52	4.43	10.87	907.1	925.6	998.6	877.1	947.1	1090.4	934.5	996.6	1171.6	904.5	High	High	High	High	High	High	High	High	High	High	High		0		1.09496	0.242145
O88325	Alpha-N-acetylglucosaminidase OS=Mus musculus OX=10090 GN=Naglu PE=1 SV=1	5	3	3	3	1	739	82.5	6.61		10.63		3	0	38.58	38.5	9.15	9.53	39.7	32.5	42.8	37.9	40	36.8	44.6	36.1	35.7	39.3	High	High	High	High	High	High	High	High	High	High	High		0		0.997926	0.981262
Q9EPC1	Alpha-parvin OS=Mus musculus OX=10090 GN=Parva PE=1 SV=1	23	8	22	5	1	372	42.3	5.95	173	43.32	8	8	0	381.28	413.84	11.97	9.98	352.4	445.6	375.1	413.1	320.2	463.3	360.8	387.8	443.6	413.7	High	High	High	High	High	High	High	High	High	High	High		0		1.0854	0.400676
Q9CXB8	Alpha-protein kinase 1 OS=Mus musculus OX=10090 GN=Alpk1 PE=2 SV=2	2	2	4	2	1	1231	136	6.38	28	2.02	2	1	0	1260.76	1209.42	7.12	5.99	1281.6	1292.6	1169.6	1316.8	1243.2	1228.3	1241.9	1247.9	1248.3	1080.7	Medium	Medium	Medium	Medium	Medium	Medium	Medium	Medium	Medium	Medium	Medium		0		0.959279	0.252001
D3YUT2	Alpha-protein kinase 3 OS=Mus musculus OX=10090 GN=Alpk3 PE=1 SV=1	1	1	1	1	1	1680	180	6.16		0		1	0	#DIV/0!	#DIV/0!													High	High	High	High	High	High	High	High	High	High	High		0		#DIV/0!	#DIV/0!
P82350	Alpha-sarcoglycan OS=Mus musculus OX=10090 GN=Sgca PE=1 SV=1	46	14	67	14	1	387	43.3	6.47	704	144.18	13	14	0	5013.38	4924.18	3.79	2.21	4710.3	5239.7	5148.7	5076.6	4891.6	4844.5	4981.7	4808.1	5079.6	4907	High	High	High	High	High	High	High	High	High	High	High		0		0.982208	0.376465
Q9DB05	Alpha-soluble NSF attachment protein OS=Mus musculus OX=10090 GN=Napa PE=1 SV=1	67	17	89	17	1	295	33.2	5.45	768	201.71	17	17	0	6144.72	6306.94	3.49	1.27	5971.5	6331.4	6313.4	6270.1	5837.2	6396.5	6258.6	6219.5	6387.2	6272.9	High	High	High	High	High	High	High	High	High	High	High		0		1.0264	0.232791
Q6PAM1	Alpha-taxilin OS=Mus musculus OX=10090 GN=Txlna PE=1 SV=1	8	6	16	3	1	554	62.3	6.74	84	20.57	5	5	0	1181.76	1225.94	13.33	13.58	989.1	1465.8	1185.7	1134.3	1133.9	1496.3	1047.6	1150.3	1216.4	1219.1	High	High	High	High	High	High	High	High	High	High	High		0		1.03738	0.780069
Q8CIH9	Amidophosphoribosyltransferase OS=Mus musculus OX=10090 GN=Ppat PE=1 SV=1	28	10	13	10	1	517	57.4	6.96		52.42		10	0	1118.16	1230.92	2.46	4.18	1128.3	1108.9	1145.1	1118.4	1090.1	1221.2	1270.4	1226	1153	1284	High	High	High	High	High	High	High	High	High	High	High		0		1.10084	0.0171254
Q64133	Amine oxidase [flavin-containing] A OS=Mus musculus OX=10090 GN=Maoa PE=1 SV=3	29	13	44	11	1	526	59.6	7.81	372	85.56	13	13	0	1691.06	1820.16	7.39	9.77	1781.9	1637.2	1882.3	1542.1	1611.8	2020.1	1648.7	1669.4	1997.5	1765.1	High	High	High	High	High	High	High	High	High	High	High		0		1.07634	0.31229
Q8BW75	Amine oxidase [flavin-containing] B OS=Mus musculus OX=10090 GN=Maob PE=1 SV=4	52	24	274	22	1	520	58.5	8.29	2190	582.64	22	24	2	30453.2	28221.7	5.82	19.36	33553.6	28115.4	29916.6	30062.3	30618.1	24532.5	24650.5	28655.4	37531.8	25738.1	High	High	High	High	High	High	High	High	High	High	High	Oxidation [P465; P467]	0		0.926722	0.460458
E9Q745	Amine oxidase OS=Mus musculus OX=10090 GN=1600015I10Rik PE=3 SV=1	2	1	1	1	1	711	81.5	7.33		0		1	0	372.08	381.48	6.3	4.56	355.3	361.4	391.7	399.6	352.4	366.5	406.7	385.4	363.6	385.2	Medium	Medium	Medium	Medium	Medium	Medium	Medium	Medium	Medium	Medium	Medium	Oxidation [P129; P131]	0		1.02526	0.549519
Q9ESU7	Amino acid transporter OS=Mus musculus OX=10090 GN=Slc1a5 PE=1 SV=1	9	4	5	4	1	555	58.4	7.12		19.48		4	0	552.5	541.34	19.04	16.12	747.3	536.1	534.8	478.5	465.8	695.1	488.4	519	516.9	487.3	High	High	High	High	High	High	High	High	High	High	High		0		0.979801	0.571204
P31230	Aminoacyl tRNA synthase complex-interacting multifunctional protein 1 OS=Mus musculus OX=10090 GN=Aimp1 PE=1 SV=2	66	16	89	15	1	310	34	8.35	1166	243.44	14	15	0	5155.86	5425.06	5.87	3.64	4941.8	4812.4	5633.6	5314.4	5077.1	5456.4	5678.2	5358.6	5139.4	5492.7	High	High	High	High	High	High	High	High	High	High	High		0		1.05221	0.280204
Q8R010	Aminoacyl tRNA synthase complex-interacting multifunctional protein 2 OS=Mus musculus OX=10090 GN=Aimp2 PE=1 SV=2	36	9	31	9	1	320	35.4	7.83	210	61.37	8	9	0	3387.2	3372.04	7.67	7.55	3880.7	3172.6	3366.3	3333.1	3183.3	3293.2	3360.8	3810.5	3193.3	3202.4	High	High	High	High	High	High	High	High	High	High	High		0		0.995524	0.934277
Q99JW2	Aminoacylase-1 OS=Mus musculus OX=10090 GN=Acy1 PE=1 SV=1	44	16	62	16	1	408	45.8	6.32	576	128.95	16	16	0	5249.16	5586.58	3.57	5.73	5279.2	5275	5511.1	4978.3	5202.2	5937.9	5647.7	5119.8	5436.5	5791	High	High	High	High	High	High	High	High	High	High	High		0		1.06428	0.148517
Q8VCT3	Aminopeptidase B OS=Mus musculus OX=10090 GN=Rnpep PE=1 SV=2	35	19	66	19	1	650	72.4	5.35	593	150.39	16	19	0	5631.56	5642.8	3.25	3.54	5797.5	5476.6	5851.2	5565.8	5466.7	5576.3	5837.4	5787.4	5334.6	5678.3	High	High	High	High	High	High	High	High	High	High	High		0		1.002	0.928985
P97449	Aminopeptidase N OS=Mus musculus OX=10090 GN=Anpep PE=1 SV=4	22	19	55	18	1	966	109.6	5.9	363	109.42	17	18	0	3464.92	3587.96	6.83	7.56	3691.4	3512.4	3728.2	3235.9	3156.7	3991.5	3346.6	3364.4	3722.5	3514.8	High	High	High	High	High	High	High	High	High	High	High		0		1.03551	0.495317
E9QJR0	Aminopeptidase OS=Mus musculus OX=10090 GN=Lvrn PE=1 SV=1	1	1	1	1	1	991	113.2	5.47		3.02		1	0	546.18	616.4	10.43	4.89	475	519.8	621.2	599.9	515	617.8	622.6	655.1	615.9	570.6	High	High	High	High	High	High	High	High	High	High	High		0		1.12857	0.0391053
Q9DBT5	AMP deaminase 2 OS=Mus musculus OX=10090 GN=Ampd2 PE=1 SV=1	4	4	8	2	1	798	92	6.23	31	12.87	3	4	0	#DIV/0!	#DIV/0!													High	High	High	High	High	High	High	High	High	High	High		0		#DIV/0!	#DIV/0!
O08739	AMP deaminase 3 OS=Mus musculus OX=10090 GN=Ampd3 PE=1 SV=2	19	15	32	13	1	766	88.6	7.33	212	58.92	14	15	1	3556.7	3588.68	2.91	2.4	3505.9	3547.8	3587.9	3636.2	3505.7	3494.8	3673.6	3657.9	3617.8	3499.3	High	High	High	High	High	High	High	High	High	High	High		0		1.00899	0.322912
F8VPN4	Amylo-1,6-glucosidase, 4-alpha-glucanotransferase OS=Mus musculus OX=10090 GN=Agl PE=1 SV=1	56	73	251	74	1	1532	174.2	6.74		1018.56		73	0	43182.9	42595.2	1.33	3.34	44027.2	42565.1	43514.9	42628	43179.2	41534.6	42936.2	41188.7	44802.8	42513.9	High	High	High	High	High	High	High	High	High	High	High	Oxidation [P800; P926]	0		0.986392	0.537314
Q9QXJ1	Amyloid-beta A4 precursor protein-binding family B member 1 OS=Mus musculus OX=10090 GN=Apbb1 PE=1 SV=3	3	2	7	1	1	710	77.3	5	17	10.73	2	2	0	37.94	36.72	20.17	26.91	30.4	48.6	40.7	38.2	31.8	50.8	26.9	32.4	42.9	30.6	High	High	High	High	High	High	High	High	High	High	High		0		0.967844	0.869581
P12023	Amyloid-beta A4 protein OS=Mus musculus OX=10090 GN=App PE=1 SV=3	2	2	7	2	1	770	86.7	4.79	40	9.65	2	2	0	753.46	707.24	3.79	6.75	770.9	701.8	749.7	767.8	777.1	638.5	702.6	714.1	773.1	707.9	High	High	High	High	High	High	High	High	High	High	High		0		0.938656	0.143279
Q91X58	AN1-type zinc finger protein 2B OS=Mus musculus OX=10090 GN=Zfand2b PE=1 SV=1	7	1	2	1	1	257	27.9	6.93	32	3.96	1	1	0	35.92	37.66	9.5	8.29	34.7	39.6	38.4	31.5	35.4	36.8	39.1	32.7	38.9	40.8	High	High	High	High	High	High	High	High	High	High	High		0		1.04844	0.491702
Q9DCH6	AN1-type zinc finger protein 6 OS=Mus musculus OX=10090 GN=Zfand6 PE=1 SV=1	25	4	10	4	1	223	24	6.51	169	20.25	3	4	0	664.16	646.84	3.01	5.31	649.2	649.3	696.7	657.7	667.9	689.1	675.5	606.3	630	633.3	High	High	High	High	High	High	High	High	High	High	High		0		0.973922	0.499622
F8WIK0	Anamorsin OS=Mus musculus OX=10090 GN=Ciapin1 PE=1 SV=2	27	8	50	8	1	309	33.4	5.2	370	89.3	8	8	0	4254.94	4272.88	4.44	4.76	4079.3	4069.1	4406.9	4482.4	4237	4282.1	4271.3	3946.8	4497.8	4366.4	High	High	High	High	High	High	High	High	High	High	High		0		1.00422	0.892233
P53995	Anaphase-promoting complex subunit 1 OS=Mus musculus OX=10090 GN=Anapc1 PE=1 SV=2	2	2	4	2	1	1944	215.9	6.35	23	5.65	2	2	0	22.94	23.44	13.67	20.05	21.7	26.4	25.8	23.1	17.7	25.9	18.5	24.2	29.6	19	High	High	High	High	High	High	High	High	High	High	High		0		1.0218	0.851412
Q8R034	Anaphase-promoting complex subunit 13 OS=Mus musculus OX=10090 GN=Anapc13 PE=3 SV=1	55	2	6	2	1	74	8.3	4.18	62	16.42	2	2	0	155.9	170.94	12.02	3.69	180.1	151.6	168.2	125.1	154.5	178.3	163.3	166	171.5	175.6	High	High	High	High	High	High	High	High	High	High	High		0		1.09647	0.169208
Q91W96	Anaphase-promoting complex subunit 4 OS=Mus musculus OX=10090 GN=Anapc4 PE=1 SV=1	1	1	5	1	1	807	91.6	5.4	22		1		0	1199.86	1159.9	5.24	7.95	1228.4	1112.5	1274.8	1243.6	1140	1188.7	1240.8	1245.1	1048.4	1076.5	Medium	Medium	Medium	Medium	Medium	Medium	Medium	Medium	Medium	Medium	Medium		0		0.966696	0.481215
Q99JP4	Anaphase-promoting complex subunit CDC26 OS=Mus musculus OX=10090 GN=Cdc26 PE=1 SV=1	52	3	6	3	1	85	9.8	6.81	80	14.84	3	3	0	251.04	266.72	5.87	8.71	234.3	254.8	273.8	248.6	243.7	301.9	265	238.2	257.6	270.9	High	High	High	High	High	High	High	High	High	High	High		0		1.06246	0.399192
P70295	Ancient ubiquitous protein 1 OS=Mus musculus OX=10090 GN=Aup1 PE=1 SV=1	16	5	13	5	1	410	46.1	8.4	37	21.49	5	5	0	597.68	640.82	11.35	14.55	515.3	687.3	661.7	534.2	589.9	792.5	536.7	621.2	635.1	618.6	High	High	High	High	High	High	High	High	High	High	High		0		1.07218	0.579904
J3QN89	Angio-associated migratory protein OS=Mus musculus OX=10090 GN=Aamp PE=1 SV=1	6	2	3	2	1	436	46.9	4.41		12.08		2	0	224.46	225.12	5.1	3.07	223.2	213.6	246.2	217.7	221.6	222	227.3	230.4	214.6	231.3	High	High	High	High	High	High	High	High	High	High	High		0		1.00294	0.905082
Q8K371	Angiomotin-like protein 2 OS=Mus musculus OX=10090 GN=Amotl2 PE=1 SV=1	2	2	10	1	1	772	85.2	7.21	32	14.54	1	2	0	1556.8	1784.08	14.5	18.31	1315.4	1711.5	1806.7	1670.1	1280.3	1872.8	1481	1424.5	2199.8	1942.3	High	High	High	High	High	High	High	High	High	High	High		0		1.14599	0.36047
B1AWS8	Angiopoietin-1 receptor OS=Mus musculus OX=10090 GN=Tek PE=1 SV=1	1	1	1	1	1	1123	125.7	6.74		0		1	0	#DIV/0!	#DIV/0!													High	High	High	High	High	High	High	High	High	High	High		0		#DIV/0!	#DIV/0!
P09470	Angiotensin-converting enzyme OS=Mus musculus OX=10090 GN=Ace PE=1 SV=3	17	20	64	20	1	1312	150.8	6.55	425	116.63	19	20	0	6188.28	5998.18	5.14	3.28	6645.4	6009.3	6482.4	5956.4	5847.9	6125.3	6194.6	6063.7	5704.5	5902.8	High	High	High	High	High	High	High	High	High	High	High		0		0.969281	0.232611
P16283	Anion exchange protein 3 OS=Mus musculus OX=10090 GN=Slc4a3 PE=1 SV=2	7	7	22	7	1	1227	135.3	6.51	189	50.19	5	7	0	1958.58	1936.72	3.63	3.81	1864.9	1957.4	2072.6	1921.6	1976.4	1955.6	1986.4	1839.6	2018.6	1883.4	High	High	High	High	High	High	High	High	High	High	High		0		0.988839	0.745548
Q9EP71	Ankycorbin OS=Mus musculus OX=10090 GN=Rai14 PE=1 SV=1	1	1	4	1	1	979	108.8	6.27	0	5.18	1	1	0	640.56	646.32	10.48	5.48	665.2	556.9	663.5	621.1	696.1	601.2	677.1	665.7	615.1	672.5	High	High	High	High	High	High	High	High	High	High	High		0		1.00899	0.860764
A2RT91	Ankyrin and armadillo repeat-containing protein OS=Mus musculus OX=10090 GN=Ankar PE=2 SV=1	0	1	1	1	1	1465	165.2	7.68		1.77		1	0	#DIV/0!	#DIV/0!													Medium	Medium	Medium	Medium	Medium	Medium	Medium	Medium	Medium	Medium	Medium		0		#DIV/0!	#DIV/0!
Q8C0W1	Ankyrin repeat and MYND domain-containing protein 1 OS=Mus musculus OX=10090 GN=Ankmy1 PE=1 SV=1	1	1	1	1	1	906	101.9	6.6	0		1		0	131.22	307.8	32.69	110.08	117	214.3	115.8	92.2	116.8	190.9	97.4	79.7	273.2	897.8	Medium	Medium	Medium	Medium	Medium	Medium	Medium	Medium	Medium	Medium	Medium		0		2.34568	0.329698
P59672	Ankyrin repeat and SAM domain-containing protein 1A OS=Mus musculus OX=10090 GN=Anks1a PE=1 SV=3	3	2	6	2	1	1150	125.2	6.05	60	12.57	2	2	0	36.56	37.78	10.69	8.22	39.2	39.8	39.8	33.8	30.2	36.6	35	37.1	37.1	43.1	High	High	High	High	High	High	High	High	High	High	High		0		1.03337	0.723765
Q8K0L0	Ankyrin repeat and SOCS box protein 2 OS=Mus musculus OX=10090 GN=Asb2 PE=1 SV=1	2	1	2	1	1	634	70.2	7.05	0	3.06	1	1	0	#DIV/0!	#DIV/0!													High	High	High	High	High	High	High	High	High	High	High		0		#DIV/0!	#DIV/0!
E9Q9D8	Ankyrin repeat domain 35 OS=Mus musculus OX=10090 GN=Ankrd35 PE=1 SV=1	1	1	1	1	1	996	109.3	6.07		2.51		1	0	104.7	106.78	7.97	8.28	97.2	102.9	100.5	102.3	120.6	95.5	115.4	114.2	99.7	109.1	Medium	Medium	Medium	Medium	Medium	Medium	Medium	Medium	Medium	Medium	Medium	Oxidation [P396; P400]	2	Oxidation [P396; P400]	1.01987	0.688184
D3Z4K0	Ankyrin repeat domain 36 OS=Mus musculus OX=10090 GN=Ankrd36 PE=1 SV=1	1	1	1	1	1	1415	159.1	5.66		2.59		1	0	179.8	189.66	61.87	25.31	164	378.2	170.2	122.3	64.3	251.1	141.7	139.8	209	206.7	High	High	High	High	High	High	High	High	High	High	High		0		1.05484	0.891298
Q9CR42	Ankyrin repeat domain-containing protein 1 OS=Mus musculus OX=10090 GN=Ankrd1 PE=1 SV=1	5	2	4	2	1	319	36	8.63	16	6.34	2	2	0	437.32	500.5	11.94	18.92	362.2	422.7	447.7	521.7	432.3	491.7	405.4	545.1	637.4	422.9	High	High	High	High	High	High	High	High	High	High	High		0		1.14447	0.116873
Q99NH0	Ankyrin repeat domain-containing protein 17 OS=Mus musculus OX=10090 GN=Ankrd17 PE=1 SV=2	1	2	3	2	1	2603	274	6.52	41	5.51	1	2	0	82.68	85.32	14.32	8.41	70	89.9	81	101.4	71.1	97.6	80.9	81.8	80.7	85.6	High	High	High	High	High	High	High	High	High	High	High		0		1.03193	0.771799
A0A0R4J1L1	Ankyrin repeat domain-containing protein 7 OS=Mus musculus OX=10090 GN=Ankrd7 PE=4 SV=1	2	1	1	1	1	280	31.3	9.07		0		1	0	#DIV/0!	#DIV/0!													High	High	High	High	High	High	High	High	High	High	High		0		#DIV/0!	#DIV/0!
Q99PE2	Ankyrin repeat family A protein 2 OS=Mus musculus OX=10090 GN=Ankra2 PE=1 SV=1	2	1	17	1	1	312	34	5.17		38.84		1	0	164.42	158.94	5.78	6.32	161.3	156.7	172.4	156.4	175.3	145.1	165.3	151.7	168.4	164.2	High	High	High	High	High	High	High	High	High	High	High		0		0.966671	0.455613
S4R2Q9	Ankyrin-2 (Fragment) OS=Mus musculus OX=10090 GN=Ank2 PE=1 SV=1	37	3	5	3	1	142	15.7	5.92		29.36		3	0	321.34	319.92	6.39	9.29	319.3	324	300.1	341.8	321.5	347	348.7	314.9	276.4	312.6	High	High	High	High	High	High	High	High	High	High	High		0		0.995581	0.938304
G5E8K5	Ankyrin-3 OS=Mus musculus OX=10090 GN=Ank3 PE=1 SV=1	17	28	64	25	1	1961	213.9	6.7	488	130.96	28	28	0	3917.9	3900.96	4.43	3.1	3664.4	3992.1	4053.8	4114	3765.2	4100.4	3777.7	3881.9	3900.3	3844.5	High	High	High	High	High	High	High	High	High	High	High		0		0.995676	0.899326
P10107	Annexin A1 OS=Mus musculus OX=10090 GN=Anxa1 PE=1 SV=2	64	19	95	19	1	346	38.7	7.37	1164	230.29	19	19	0	7416.66	8168.48	5.76	5.94	7575	7294.1	8114.1	7284.7	6815.4	8714.7	7726.8	7855.2	8678.8	7866.9	High	High	High	High	High	High	High	High	High	High	High		0		1.10137	0.0651609
P97384	Annexin A11 OS=Mus musculus OX=10090 GN=Anxa11 PE=1 SV=2	34	16	67	15	1	503	54	7.66	761	159.7	13	16	0	7166.98	6602.96	20.52	6.35	6192.2	8899.7	6001	8503.7	6238.3	6792.2	6221.5	6368.1	7250	6383	High	High	High	High	High	High	High	High	High	High	High		0		0.921303	0.413924
P07356	Annexin A2 OS=Mus musculus OX=10090 GN=Anxa2 PE=1 SV=2	58	24	241	24	1	339	38.7	7.69	2127	491.5	24	24	0	25925.9	28543.2	1.02	4.09	25788	26197.8	26014	25648.8	25981.1	29744.1	27952.1	29372.5	26837	28810.5	High	High	High	High	High	High	High	High	High	High	High		0		1.10095	0.00676358
O35639	Annexin A3 OS=Mus musculus OX=10090 GN=Anxa3 PE=1 SV=4	66	23	111	21	1	323	36.4	5.76	891	210.25	21	21	2	13276.5	14066.6	2.37	5.18	13229.1	12945.4	13699.5	13550.2	12958.3	14601.9	13436.8	15013.8	13940.5	13340.1	High	High	High	High	High	High	High	High	High	High	High		0		1.05951	0.0253169
P97429	Annexin A4 OS=Mus musculus OX=10090 GN=Anxa4 PE=1 SV=4	60	18	104	17	1	319	35.9	5.57	1150	209.95	17	18	0	9310.38	9630.82	2.72	4.64	9596.2	8983.3	9469.9	9091.5	9411	9513.9	9140	10154.9	10038.1	9307.2	High	High	High	High	High	High	High	High	High	High	High		0		1.03442	0.204189
P48036	Annexin A5 OS=Mus musculus OX=10090 GN=Anxa5 PE=1 SV=1	78	24	309	23	1	319	35.7	4.96	3100	616.07	24	24	0	38258.6	40799.6	5.12	5.56	41639.7	37404.2	39187.8	36413.5	36648	44101.2	41339.1	40200.3	37801.6	40555.7	High	High	High	High	High	High	High	High	High	High	High		0		1.06641	0.0142124
P14824	Annexin A6 OS=Mus musculus OX=10090 GN=Anxa6 PE=1 SV=3	76	57	737	2	1	673	75.8	5.5	4888	1326.73	53	57	67	93037.4	87815.7	3.76	9.24	94689.4	93653.3	97238.5	92067.5	87538.2	94789.8	93715.1	89019.3	74468.1	87086.3	High	High	High	High	High	High	High	High	High	High	High	Oxidation [P365; P536]	2	Oxidation [P365; P536]	0.943876	0.207102
Q07076	Annexin A7 OS=Mus musculus OX=10090 GN=Anxa7 PE=1 SV=2	29	13	71	13	1	463	49.9	6.18	812	139.54	12	13	0	5715.44	5790.46	16.98	14	4711.9	6856.6	5248.6	6869.1	4891	5715.2	4946	5255.1	7049.3	5986.7	High	High	High	High	High	High	High	High	High	High	High		0		1.01313	0.896486
F8WIT2	Annexin OS=Mus musculus OX=10090 GN=Anxa6 PE=1 SV=1	76	56	381	1	1	667	75.2	5.55		1278.42		56	0	1069.96	997.74	4.68	13.87	1033.6	1108.1	1124.6	1078.2	1005.3	1127.4	1121.7	997.1	792.4	950.1	High	High	High	High	High	High	High	High	High	High	High	Oxidation [P365]	1	Oxidation [P365]	0.932502	0.327277
Q8BH79	Anoctamin-10 OS=Mus musculus OX=10090 GN=Ano10 PE=1 SV=1	9	4	12	4	1	659	76.1	6.7	103	25.39	4	4	0	356.24	360.7	5.39	8.06	351.9	384.7	368.8	331.8	344	346.3	343	353.8	412.2	348.2	High	High	High	High	High	High	High	High	High	High	High		0		1.01252	0.83816
Q6P9J9	Anoctamin-6 OS=Mus musculus OX=10090 GN=Ano6 PE=1 SV=1	5	3	5	3	1	911	106.2	6.76	27	10.98	2	3	0	148.04	163.96	3.23	5.05	147.6	149.5	153.2	147.4	142.5	170.1	153.3	164.6	158.3	173.5	High	High	High	High	High	High	High	High	High	High	High		0		1.10754	0.029711
Q6DFX2	Anthrax toxin receptor 2 OS=Mus musculus OX=10090 GN=Antxr2 PE=1 SV=1	13	5	15	5	1	487	53.2	7.56	62	35.11	4	5	0	350.3	376.04	2.89	6.69	351.7	340.4	358.1	337.4	363.9	382.6	395	346.3	353.3	403	High	High	High	High	High	High	High	High	High	High	High		0		1.07348	0.0845794
P21958	Antigen peptide transporter 1 OS=Mus musculus OX=10090 GN=Tap1 PE=1 SV=3	2	2	4	2	1	724	78.8	8.79	22	4.64	2	2	0	264.42	320.88	4.44	11.96	262.6	285.2	259.3	265.4	249.6	350.3	275.2	306.2	369.8	302.9	High	High	High	High	High	High	High	High	High	High	High		0		1.21352	0.0459137
P36371	Antigen peptide transporter 2 OS=Mus musculus OX=10090 GN=Tap2 PE=1 SV=1	1	1	2	1	1	702	77.4	7.24	36	3.56	1	1	0	208.38	240.36	16.67	13.44	186.4	267.8	204.3	195.6	187.8	276.9	197.9	222.8	267.1	237.1	High	High	High	High	High	High	High	High	High	High	High		0		1.15347	0.31937
P32261	Antithrombin-III OS=Mus musculus OX=10090 GN=Serpinc1 PE=1 SV=1	29	15	46	15	1	465	52	6.46	387	91.52	15	15	0	3397.58	3408.2	19.66	27.1	4283.2	2274.3	3497.7	3166.5	3766.2	2695.9	2563.5	3069.7	3981.1	4730.8	High	High	High	High	High	High	High	High	High	High	High		0		1.00313	0.982981
Q3TIV9	AP complex subunit sigma OS=Mus musculus OX=10090 GN=Ap1s2 PE=1 SV=1	26	4	4	3	1	157	18.6	5.47		13.48		4	0	153.18	162.38	7.4	10.58	135.1	163.3	165.2	148.6	153.7	151.1	149	160.9	159.2	191.7	High	High	High	High	High	High	High	High	High	High	High		0		1.06006	0.363423
O35643	AP-1 complex subunit beta-1 OS=Mus musculus OX=10090 GN=Ap1b1 PE=1 SV=2	36	31	128	14	1	943	103.9	5.17	1153	271.87	29	31	14	10798.4	11112.2	12.75	6.84	9053.7	12240	10113	12504.4	10080.8	11176.9	10226.3	10571.6	12180.4	11405.7	High	High	High	High	High	High	High	High	High	High	High		0		1.02906	0.682215
P22892	AP-1 complex subunit gamma-1 OS=Mus musculus OX=10090 GN=Ap1g1 PE=1 SV=3	15	12	27	12	1	822	91.3	6.8	168	50.42	10	12	0	1192.48	1191.62	14.78	10.66	903.1	1402.7	1245.8	1303.4	1107.4	1219.4	1040.8	1091.5	1358.2	1248.2	High	High	High	High	High	High	High	High	High	High	High		0		0.999279	0.994526
P35585	AP-1 complex subunit mu-1 OS=Mus musculus OX=10090 GN=Ap1m1 PE=1 SV=3	18	7	15	7	1	423	48.5	7.3	56	26.36	7	7	0	1060.14	1105.26	9.4	5.14	954.5	1188.6	1070.4	1138.3	948.9	1153.5	1058.7	1046.7	1174.7	1092.7	High	High	High	High	High	High	High	High	High	High	High		0		1.04256	0.484811
P61967	AP-1 complex subunit sigma-1A OS=Mus musculus OX=10090 GN=Ap1s1 PE=1 SV=1	15	2	3	1	1	158	18.7	5.73	22	5.94	1	2	0	#DIV/0!	#DIV/0!													High	High	High	High	High	High	High	High	High	High	High		0		#DIV/0!	#DIV/0!
P17426	AP-2 complex subunit alpha-1 OS=Mus musculus OX=10090 GN=Ap2a1 PE=1 SV=1	35	32	104	18	1	977	107.6	7.03	655	184.28	32	32	0	2898.86	3043.52	5.9	6.47	2664.9	3122.4	2907.2	3029.9	2769.9	3097.4	2830.5	2875.7	3318.8	3095.2	High	High	High	High	High	High	High	High	High	High	High		0		1.0499	0.340366
P17427	AP-2 complex subunit alpha-2 OS=Mus musculus OX=10090 GN=Ap2a2 PE=1 SV=2	34	32	107	18	1	938	104	6.93	663	196.96	29	32	11	6423.34	6781.64	7.95	6.85	5810.5	6845.8	6448.3	7109.4	5902.7	6852.9	6301.4	6561.4	7532.6	6659.9	High	High	High	High	High	High	High	High	High	High	High		0		1.05578	0.261723
Q9DBG3	AP-2 complex subunit beta OS=Mus musculus OX=10090 GN=Ap2b1 PE=1 SV=1	34	28	111	11	1	937	104.5	5.38	925	227.67	26	28	0	2105.62	2215.08	6.23	5.46	1908.5	2306.6	2088	2168.9	2056.1	2236.2	2102	2085.8	2370.8	2280.6	High	High	High	High	High	High	High	High	High	High	High		0		1.05198	0.313422
P84091	AP-2 complex subunit mu OS=Mus musculus OX=10090 GN=Ap2m1 PE=1 SV=1	35	15	51	15	1	435	49.6	9.54	350	93.41	15	15	0	4852.52	5017.54	13.7	8.69	4050.7	5515.2	4589.5	5709.7	4397.5	5003.4	4622.1	4792.5	5753.8	4915.9	High	High	High	High	High	High	High	High	High	High	High		0		1.03401	0.619057
P62743	AP-2 complex subunit sigma OS=Mus musculus OX=10090 GN=Ap2s1 PE=1 SV=1	25	4	12	4	1	142	17	6.18	49	19.4	4	4	0	163.38	181.24	9.42	4.87	164.7	175.4	183	141.5	152.3	188.3	175.8	176.2	193	172.9	High	High	High	High	High	High	High	High	High	High	High		0		1.10932	0.155164
Q3UHJ0	AP2-associated protein kinase 1 OS=Mus musculus OX=10090 GN=Aak1 PE=1 SV=2	16	8	16	8	1	959	103.3	6.7	144	38.25	6	8	0	354.12	372.64	6.85	8.01	316	381.9	370.3	347.3	355.1	403.9	337.3	344.7	393.4	383.9	High	High	High	High	High	High	High	High	High	High	High		0		1.0523	0.484971
Q9Z1T1	AP-3 complex subunit beta-1 OS=Mus musculus OX=10090 GN=Ap3b1 PE=1 SV=2	2	2	4	2	1	1105	122.7	5.66	62	7.79	2	2	0	372.42	365.68	29.26	13.73	270.2	503.5	310.2	483.4	294.8	375.2	306.6	342.5	442.8	361.3	High	High	High	High	High	High	High	High	High	High	High		0		0.981902	0.905361
O54774	AP-3 complex subunit delta-1 OS=Mus musculus OX=10090 GN=Ap3d1 PE=1 SV=1	12	10	24	9	1	1199	135	7.37	225	61.39	9	10	0	756.78	747.76	13.69	9.22	608.5	873.7	710.2	867.9	723.6	727.1	701.3	728.2	869.5	712.7	High	High	High	High	High	High	High	High	High	High	High		0		0.988081	0.856591
Q9JKC8	AP-3 complex subunit mu-1 OS=Mus musculus OX=10090 GN=Ap3m1 PE=1 SV=1	3	1	2	1	1	418	46.9	6.93	0	2.97	1	1	0	69.44	75.74	8.58	9.18	59.8	76.1	73.4	66.2	71.7	79.8	73	70.4	69.6	85.9	High	High	High	High	High	High	High	High	High	High	High		0		1.09073	0.247351
Q8BSZ2	AP-3 complex subunit sigma-2 OS=Mus musculus OX=10090 GN=Ap3s2 PE=1 SV=1	6	1	2	1	1	193	22	5.22	17	3.34	1	1	0	#DIV/0!	#DIV/0!													High	High	High	High	High	High	High	High	High	High	High		0		#DIV/0!	#DIV/0!
Q3TAP4	AP-5 complex subunit beta-1 OS=Mus musculus OX=10090 GN=Ap5b1 PE=1 SV=1	2	2	5	2	1	876	94.6	6.07	0	3.43	2	1	0	1264	1184.28	17.81	8.31	1203.6	1256.3	1008.1	1506.9	1345.1	1134.6	1322	1077	1141	1246.8	High	High	High	High	High	High	High	High	High	High	High		0		0.93693	0.371333
Q9WV08	Apelin receptor OS=Mus musculus OX=10090 GN=Aplnr PE=1 SV=1	3	1	2	1	1	377	42.2	7.49	20	2.78	1	1	0	154.38	160.4	8.42	7.75	160.7	156.5	173.5	145.8	135.4	143.6	153.4	162.4	176	166.6	High	High	High	High	High	High	High	High	High	High	High		0		1.03899	0.590931
Q00623	Apolipoprotein A-I OS=Mus musculus OX=10090 GN=Apoa1 PE=1 SV=2	48	15	81	15	1	264	30.6	5.73	529	149.63	14	15	0	8178.64	7561.42	22.18	27.75	11163.1	5661.2	8232.8	7891.8	7944.3	6251	6120	5935.4	8858.1	10642.6	High	High	High	High	High	High	High	High	High	High	High		0		0.924533	0.669069
P09813	Apolipoprotein A-II OS=Mus musculus OX=10090 GN=Apoa2 PE=1 SV=2	19	2	11	2	1	102	11.3	7.18	116	22.91	2	2	0	1794.14	1818.3	18.89	32.3	2390.2	1839.7	1785.1	1481.9	1473.8	1530.9	1327	1685.5	1716.2	2831.9	High	High	High	High	High	High	High	High	High	High	High		0		1.01347	0.952516
P06728	Apolipoprotein A-IV OS=Mus musculus OX=10090 GN=Apoa4 PE=1 SV=3	21	8	17	8	1	395	45	5.47	142	35.89	8	8	0	691.72	754.48	16.38	28.71	876.3	536.2	705	708	633.1	591.2	584.4	640.3	881.1	1075.4	High	High	High	High	High	High	High	High	High	High	High		0		1.09073	0.631849
Q8C7G5	Apolipoprotein A-V OS=Mus musculus OX=10090 GN=Apoa5 PE=1 SV=1	2	1	1	1	1	368	41.2	6.01	0		1		0	#DIV/0!	#DIV/0!													Medium	Medium	Medium	Medium	Medium	Medium	Medium	Medium	Medium	Medium	Medium		0		#DIV/0!	#DIV/0!
E9Q414	Apolipoprotein B-100 OS=Mus musculus OX=10090 GN=Apob PE=1 SV=1	1	3	14	3	1	4505	509.1	6.81	21	13.69	3	3	0	2349.84	2326.04	12.55	13.67	2107.5	2437.1	2357.1	2840.5	2007	2345.5	2029.5	2651.6	2624.8	1978.8	High	High	High	High	High	High	High	High	High	High	High		0		0.989872	0.866719
P34928	Apolipoprotein C-I OS=Mus musculus OX=10090 GN=Apoc1 PE=1 SV=1	18	2	6	2	1	88	9.7	9.09	20	9.9	2	2	0	1277.18	1260.26	20.7	18.63	1739.8	1074.4	1276.9	1018.9	1275.9	1170.8	1065.4	1136.7	1269.3	1659.1	High	High	High	High	High	High	High	High	High	High	High		0		0.986752	0.923753
P08226	Apolipoprotein E OS=Mus musculus OX=10090 GN=Apoe PE=1 SV=2	37	11	39	11	1	311	35.8	5.68	306	70.7	11	11	0	2469.06	2811.64	8.7	8.39	2771.7	2221.3	2425.5	2269.1	2657.7	2674.2	2852.4	2483.2	2981.1	3067.3	High	High	High	High	High	High	High	High	High	High	High		0		1.13875	0.0959429
Q9CQW7	Apoptogenic protein 1, mitochondrial OS=Mus musculus OX=10090 GN=Apopt1 PE=1 SV=1	7	1	2	1	1	192	22.7	10.13	20	3.94	1	1	0	104.54	96.82	8.1	10.6	101.9	99.5	121.2	98.5	101.6	92.3	89.5	89.9	114	98.4	High	High	High	High	High	High	High	High	High	High	High		0		0.926153	0.361367
O35841	Apoptosis inhibitor 5 OS=Mus musculus OX=10090 GN=Api5 PE=1 SV=2	37	14	37	14	1	504	56.8	5.92	313	66.44	13	13	0	1771.6	1852.74	8.33	4.66	1531.6	1888.3	1897.7	1874.4	1666	1985.3	1850.8	1779.6	1773	1875	High	High	High	High	High	High	High	High	High	High	High	Oxidation [P319; P321; P322]	0		1.0458	0.501868
Q07813	Apoptosis regulator BAX OS=Mus musculus OX=10090 GN=Bax PE=1 SV=1	23	3	14	3	1	192	21.4	4.98	112	31.89	3	3	0	1161.36	1228.22	1.87	1.79	1169.1	1161.5	1176.4	1175.9	1123.9	1258.3	1220.9	1200	1221.7	1240.2	High	High	High	High	High	High	High	High	High	High	High		0		1.05757	0.0148316
Q9EPB4	Apoptosis-associated speck-like protein containing a CARD OS=Mus musculus OX=10090 GN=Pycard PE=1 SV=1	45	8	47	8	1	193	21.4	5.43	468	114.33	8	7	0	3071.62	3564.04	4.28	7.66	3123.7	3102.7	3125.5	3137.4	2868.8	3732.2	3748.5	3371.5	3179.1	3788.9	High	High	High	High	High	High	High	High	High	High	High		0		1.16031	0.0339843
Q9Z0X1	Apoptosis-inducing factor 1, mitochondrial OS=Mus musculus OX=10090 GN=Aifm1 PE=1 SV=1	54	28	508	28	1	612	66.7	9.17	4736	1264.9	27	28	0	44391.3	43885.1	1.35	3.72	44181.8	43617.5	44306.4	45012.6	44838.1	42053.7	44128.5	46154.7	44509.8	42578.9	High	High	High	High	High	High	High	High	High	High	High	Oxidation [P168]	0		0.988598	0.553528
Q8BUE4	Apoptosis-inducing factor 2 OS=Mus musculus OX=10090 GN=Aifm2 PE=1 SV=1	8	4	6	4	1	373	40.6	8.98	0	6.17	2	4	0	336.2	304.72	6.94	11.96	318.9	325.3	344	377.4	315.4	335.4	304.8	280.6	344.8	258	High	High	High	High	High	High	High	High	High	High	High		0		0.906365	0.0931971
Q9JIX8	Apoptotic chromatin condensation inducer in the nucleus OS=Mus musculus OX=10090 GN=Acin1 PE=1 SV=3	16	16	38	15	1	1338	150.6	5.91	387	87.55	14	15	1	2001.64	2141.6	5.6	3.97	1807.5	2021.7	2145.3	2051.7	1982	2271	2146	2038	2103.6	2149.4	High	High	High	High	High	High	High	High	High	High	High		0		1.06992	0.208471
Q02013	Aquaporin-1 OS=Mus musculus OX=10090 GN=Aqp1 PE=1 SV=3	19	5	68	5	1	269	28.8	7.43	1131	153.76	5	5	0	9689.6	9803.56	3.65	8.52	9209.4	10035.1	9511	9725.7	9966.8	10698.4	10605.5	9037.8	9741	8935.1	High	High	High	High	High	High	High	High	High	High	High		0		1.01176	0.805818
P55088	Aquaporin-4 OS=Mus musculus OX=10090 GN=Aqp4 PE=1 SV=2	11	2	6	2	1	323	34.4	7.42	23	19.89	2	2	0	151.92	172.42	21.82	25.48	120.5	212.5	152.7	143	130.9	218.9	218	123.9	141.2	160.1	High	High	High	High	High	High	High	High	High	High	High		0		1.13494	0.395536
O54794	Aquaporin-7 OS=Mus musculus OX=10090 GN=Aqp7 PE=1 SV=1	8	3	8	3	1	303	32.6	8.7	21	8.42	3	3	0	570.62	585.46	5.95	7.2	557.3	563.4	619.8	537.8	574.8	584.6	539.3	553.6	645.6	604.2	High	High	High	High	High	High	High	High	High	High	High		0		1.02601	0.638425
P48999	Arachidonate 5-lipoxygenase OS=Mus musculus OX=10090 GN=Alox5 PE=1 SV=3	23	11	33	11	1	674	77.9	6.18	456	80.52	10	11	0	1691.64	1421.3	11.6	7.52	1606.2	1480.5	1967.3	1833.3	1570.9	1524.7	1461.8	1496	1268	1356	High	High	High	High	High	High	High	High	High	High	High		0		0.840191	0.0650796
P30355	Arachidonate 5-lipoxygenase-activating protein OS=Mus musculus OX=10090 GN=Alox5ap PE=1 SV=2	8	1	4	1	1	161	18.1	8.47	56	6.38	1	1	0	13.3	13.56	24.83	12.78	14.4	15.5	15.8	13.2	7.6	15.9	11.3	14.5	12.9	13.2	High	High	High	High	High	High	High	High	High	High	High		0		1.01955	0.880501
Q68FF6	ARF GTPase-activating protein GIT1 OS=Mus musculus OX=10090 GN=Git1 PE=1 SV=1	1	1	2	2	1	770	85.2	6.93	0	2.47	1	1	0	#DIV/0!	#DIV/0!													High	High	High	High	High	High	High	High	High	High	High		0		#DIV/0!	#DIV/0!
Q9JLQ2	ARF GTPase-activating protein GIT2 OS=Mus musculus OX=10090 GN=Git2 PE=1 SV=2	2	2	3	3	1	708	78.7	7.72	0	5.31	1	2	0	138.5	149.5	6.47	12.17	124.1	147.4	143.1	145.6	132.3	122.6	161.5	142.7	169.7	151	High	High	High	High	High	High	High	High	High	High	High		0		1.07942	0.0987022
Q8K221	Arfaptin-2 OS=Mus musculus OX=10090 GN=Arfip2 PE=1 SV=2	3	1	2	1	1	341	37.7	5.87	25	3.83	1	1	0	119.66	117.46	4.05	7.98	121.8	123.6	117.6	118.9	116.4	129.3	110.2	106.5	123.6	117.7	High	High	High	High	High	High	High	High	High	High	High		0		0.981615	0.630799
Q8K2K6	Arf-GAP domain and FG repeat-containing protein 1 OS=Mus musculus OX=10090 GN=Agfg1 PE=1 SV=2	8	3	9	3	1	561	58	8.63	187	24.36	2	3	0	403.38	447.68	5.54	8.41	393.2	440.3	416.4	384.5	382.5	476.6	459.5	418.5	398.5	485.3	High	High	High	High	High	High	High	High	High	High	High		0		1.10982	0.0950388
Q6ZQK5	Arf-GAP with coiled-coil, ANK repeat and PH domain-containing protein 2 OS=Mus musculus OX=10090 GN=Acap2 PE=1 SV=2	1	1	2	1	1	770	87.2	6.68	20	2.54	1	1	0	183.3	181.02	10.21	7.14	167.5	200.4	172.3	209.7	166.6	184	162.8	175.5	197.7	185.1	High	High	High	High	High	High	High	High	High	High	High		0		0.987561	0.836955
E9QP44	Arf-GAP with Rho-GAP domain, ANK repeat and PH domain-containing protein 2 OS=Mus musculus OX=10090 GN=Arap2 PE=1 SV=1	0	1	1	1	1	1703	193.3	7.17		2.18		1	0	717.6	679.88	10.82	4.21	672	798.5	661.3	797	659.2	703.9	698.9	655.5	698.6	642.5	Medium	Medium	Medium	Medium	Medium	Medium	Medium	Medium	Medium	Medium	Medium		0		0.947436	0.224612
Q7SIG6	Arf-GAP with SH3 domain, ANK repeat and PH domain-containing protein 2 OS=Mus musculus OX=10090 GN=Asap2 PE=1 SV=3	2	2	6	2	1	958	106.7	6.65	38	2.17	1	2	0	533.78	537.66	21.2	10.12	528.3	738.1	506.1	504	392.4	595.5	486.5	473.6	574.2	558.5	High	High	High	High	High	High	High	High	High	High	High		0		1.00727	0.95914
O08691	Arginase-2, mitochondrial OS=Mus musculus OX=10090 GN=Arg2 PE=1 SV=1	5	1	1	1	1	354	38.9	6.58		0		1	0	#DIV/0!	#DIV/0!													Medium	Medium	Medium	Medium	Medium	Medium	Medium	Medium	Medium	Medium	Medium	Oxidation [P261]	1	Oxidation [P261]	#DIV/0!	#DIV/0!
Q3UL36	Arginine and glutamate-rich protein 1 OS=Mus musculus OX=10090 GN=Arglu1 PE=1 SV=2	3	1	2	1	1	271	32.9	10.36	19	2.8	1	1	0	215.92	239.72	5.75	5.33	201.6	220.9	221.2	224.9	211	246.5	237.9	221.3	237.1	255.8	High	High	High	High	High	High	High	High	High	High	High		0		1.11023	0.0577389
A2AJT4	Arginine/serine-rich protein PNISR OS=Mus musculus OX=10090 GN=Pnisr PE=1 SV=1	1	1	2	1	1	805	92.1	10.01	0	2.63	1	1	0	322.8	362.38	11.62	7.08	280.7	360.3	348.3	317.7	307	335.2	377	336.6	393.3	369.8	Medium	Medium	Medium	Medium	Medium	Medium	Medium	Medium	Medium	Medium	Medium		0		1.12261	0.0703136
A2APY7	Arginine-hydroxylase NDUFAF5, mitochondrial OS=Mus musculus OX=10090 GN=Ndufaf5 PE=1 SV=1	24	9	31	9	1	343	38.4	6.1	196	57.17	9	9	0	2012.42	2088.68	3.22	4.47	1994.9	2028.3	2081.6	1933.1	2024.2	2072.5	2119.7	2159.3	1934	2157.9	High	High	High	High	High	High	High	High	High	High	High		0		1.03789	0.0237259
Q3TMX5	Arginine-rich, mutated in early stage tumors, isoform CRA_b OS=Mus musculus OX=10090 GN=Manf PE=1 SV=1	28	6	7	6	1	179	20.4	8.25		31.83		6	0	1188.28	1341.7	5.31	12.53	1140.6	1257.7	1243.3	1190	1109.8	1513.9	1514	1194.4	1163.6	1322.6	High	High	High	High	High	High	High	High	High	High	High		0		1.12911	0.136027
Q9D0I9	Arginine--tRNA ligase, cytoplasmic OS=Mus musculus OX=10090 GN=Rars PE=1 SV=2	50	35	121	35	1	660	75.6	7.55	860	240.81	34	35	0	10527.4	10903.6	4.19	3.17	9907.7	10472.2	11156.7	10843.7	10256.5	10935.2	11406.7	10700.1	10484.5	10991.4	High	High	High	High	High	High	High	High	High	High	High		0		1.03574	0.310084
Q91YI0	Argininosuccinate lyase OS=Mus musculus OX=10090 GN=Asl PE=1 SV=1	23	11	20	10	1	464	51.7	6.96	124	38.12	9	11	0	1334.26	1474.8	9.59	7.86	1509.7	1229.2	1278.3	1194	1460.1	1495.6	1342.6	1538.3	1375	1622.5	High	High	High	High	High	High	High	High	High	High	High		0		1.10533	0.0361278
P16460	Argininosuccinate synthase OS=Mus musculus OX=10090 GN=Ass1 PE=1 SV=1	12	7	13	7	1	412	46.6	8.22	45	23.56	4	7	0	720.94	784.12	8.53	24.57	805.7	672.9	731.7	650.9	743.5	709.1	653.4	1116.1	782.9	659.1	High	High	High	High	High	High	High	High	High	High	High		0		1.08764	0.521455
A0A1L1SQ41	Arginyl-tRNA--protein transferase 1 OS=Mus musculus OX=10090 GN=Ate1 PE=1 SV=1	23	10	17	10	1	559	64.1	7.8		74.48		10	0	2125.74	2229.94	2.44	3.6	2154.8	2086	2199.1	2110.7	2078.1	2311.6	2288.1	2190.2	2112.5	2247.3	High	High	High	High	High	High	High	High	High	High	High		0		1.04902	0.0798785
P98203	Armadillo repeat protein deleted in velo-cardio-facial syndrome homolog OS=Mus musculus OX=10090 GN=Arvcf PE=1 SV=2	7	4	11	4	1	962	105	6.64	194	24.81	3	4	0	296.74	318.84	15.18	4.79	290.7	348.3	323.4	283.8	237.5	331.1	328.6	294.5	326.8	313.2	High	High	High	High	High	High	High	High	High	High	High		0		1.07448	0.330963
Q9D7A8	Armadillo repeat-containing protein 1 OS=Mus musculus OX=10090 GN=Armc1 PE=1 SV=1	21	6	37	6	1	282	31.2	5.57	232	66.52	6	6	0	4312.24	4333.96	3.19	0.58	4123.1	4430	4437.8	4386.5	4183.8	4346.3	4331.6	4304.4	4369.2	4318.3	High	High	High	High	High	High	High	High	High	High	High		0		1.00504	0.766424
Q9D0L7	Armadillo repeat-containing protein 10 OS=Mus musculus OX=10090 GN=Armc10 PE=1 SV=1	23	6	16	6	1	306	33.3	7.99	135	32.82	5	6	0	1303.12	1380.2	5.27	2.5	1197.4	1396.3	1311.6	1345.4	1264.9	1360.2	1365.7	1344.6	1400.7	1429.8	High	High	High	High	High	High	High	High	High	High	High		0		1.05915	0.11328
Q3URY6	Armadillo repeat-containing protein 2 OS=Mus musculus OX=10090 GN=Armc2 PE=2 SV=3	1	2	22	2	1	854	95.3	8.03	48	4.72	2	1	0	6646.36	6159.18	6.8	9.85	6155.9	6305.3	6503.1	6998.3	7269.2	5795.2	5726.1	6228.1	7187.3	5859.2	High	High	High	High	High	High	High	High	High	High	High		0		0.9267	0.137065
Q8BNU0	Armadillo repeat-containing protein 6 OS=Mus musculus OX=10090 GN=Armc6 PE=1 SV=1	14	5	9	5	1	468	50.7	6	90	21.41	4	5	0	579.34	627.52	9.32	5.49	519.7	636.7	602.1	628.3	509.9	672.7	587.1	602.7	648.6	626.5	High	High	High	High	High	High	High	High	High	High	High		0		1.08316	0.269266
Q9DBR3	Armadillo repeat-containing protein 8 OS=Mus musculus OX=10090 GN=Armc8 PE=1 SV=2	8	3	5	3	1	673	75.3	6.73	78	12.32	3	2	0	146.56	149.94	11.8	15.19	174.1	147.9	150.2	124.8	135.8	122.6	136.4	162.2	181.3	147.2	High	High	High	High	High	High	High	High	High	High	High		0		1.02306	0.857044
Q6PD19	Armadillo-like helical domain-containing protein 3 OS=Mus musculus OX=10090 GN=Armh3 PE=1 SV=2	2	1	3	1	1	689	78.6	6.6	19	3.4	1	1	0	489.4	1102.3	35.95	110.83	395.1	828	452.8	324.8	446.3	754.9	348.4	302.4	862.5	3243.3	High	High	High	High	High	High	High	High	High	High	High		0		2.25235	0.346646
O88533	Aromatic-L-amino-acid decarboxylase OS=Mus musculus OX=10090 GN=Ddc PE=1 SV=1	12	4	9	4	1	480	53.8	6.6	66	20.82	3	4	0	204.02	239.86	9.65	16.78	192.1	225.5	227.7	192.9	181.9	271.8	241.8	209.8	190.3	285.6	High	High	High	High	High	High	High	High	High	High	High		0		1.17567	0.205704
Q9D0A3	Arpin OS=Mus musculus OX=10090 GN=Arpin PE=1 SV=1	27	5	14	5	1	226	25.2	5.19	109	26.38	5	5	0	457.06	506.72	3.44	5.55	452.8	461.2	469.7	453.1	448.5	552.2	485.8	507.7	481	506.9	High	High	High	High	High	High	High	High	High	High	High		0		1.10865	0.0225875
Q91WU5	Arsenite methyltransferase OS=Mus musculus OX=10090 GN=As3mt PE=1 SV=2	49	18	72	18	1	376	41.8	5.86	641	136.95	16	16	0	7690.26	7493.82	6.68	6.9	7917.8	8287.5	7272.8	8002.6	6970.6	8182.6	6749.3	7524.3	7364.2	7648.7	High	High	High	High	High	High	High	High	High	High	High		0		0.974456	0.647774
P50295	Arylamine N-acetyltransferase 2 OS=Mus musculus OX=10090 GN=Nat2 PE=1 SV=1	10	2	4	2	1	290	33.7	5.88	21	7.25	2	2	0	97.64	106.86	10.9	11.99	112.9	86	99.8	86.8	102.7	90.5	106.8	99.6	113.5	123.9	High	High	High	High	High	High	High	High	High	High	High		0		1.09443	0.37028
P50428	Arylsulfatase A OS=Mus musculus OX=10090 GN=Arsa PE=1 SV=2	3	2	3	2	1	506	53.7	5.87	28	5.1	1	2	0	247.46	250.7	6.76	10.04	271.4	226.7	259.9	234.9	244.4	259.3	231.3	232.6	291	239.3	High	High	High	High	High	High	High	High	High	High	High		0		1.01309	0.830721
P50429	Arylsulfatase B OS=Mus musculus OX=10090 GN=Arsb PE=1 SV=3	3	1	2	1	1	534	59.6	7.24	0	3.15	1	1	0	47	43.68	5.8	4.77	43.7	46.1	46.8	47	51.4	46.5	45.1	43.1	41.3	42.4	High	High	High	High	High	High	High	High	High	High	High		0		0.929362	0.174153
Q8BP47	Asparagine--tRNA ligase, cytoplasmic OS=Mus musculus OX=10090 GN=Nars PE=1 SV=2	38	19	86	17	1	559	64.2	5.86	760	175.65	16	19	2	7772.16	7685.36	0.84	2.95	7814	7806.6	7736.7	7720.6	7782.9	7882.8	7733.8	7436.9	7912.8	7460.5	High	High	High	High	High	High	High	High	High	High	High		0		0.988832	0.437643
P05201	Aspartate aminotransferase, cytoplasmic OS=Mus musculus OX=10090 GN=Got1 PE=1 SV=3	68	30	1071	30	1	413	46.2	7.14	6735	1822.31	30	28	0	116976	114519	4.08	3.48	122475	114222	117488	111281	119413	113791	110448	121177	113243	113935	High	High	High	High	High	High	High	High	High	High	High	Oxidation [P48; P52; P299; P300; P314]	5	Oxidation [P48; P52; P299; P300; P314]	0.978995	0.347832
P05202	Aspartate aminotransferase, mitochondrial OS=Mus musculus OX=10090 GN=Got2 PE=1 SV=1	70	35	1602	34	1	430	47.4	9	10936	3068.92	33	35	0	202364	202708	2.18	4.14	204459	205539	199426	197151	205245	206366	211105	204552	188749	202771	High	High	High	High	High	High	High	High	High	High	High	Oxidation [P74; P98; P216; P221; P223]	0		1.0017	0.901667
Q922B2	Aspartate--tRNA ligase, cytoplasmic OS=Mus musculus OX=10090 GN=Dars PE=1 SV=2	63	30	161	30	1	501	57.1	6.49	981	307.3	30	30	0	12303.3	12316.8	2.61	2.05	11987.5	12247.3	12869	12368.7	12043.8	12265.9	12589.3	12097	12061.6	12570.4	High	High	High	High	High	High	High	High	High	High	High		0		1.0011	0.957758
Q8BIP0	Aspartate--tRNA ligase, mitochondrial OS=Mus musculus OX=10090 GN=Dars2 PE=1 SV=1	24	14	38	14	1	653	74.1	6.98	145	69.24	13	14	0	1681.52	1799.02	3.54	4.8	1711	1642	1736.6	1620.2	1697.8	1815	1726.1	1932.9	1719.6	1801.5	High	High	High	High	High	High	High	High	High	High	High		0		1.06988	0.00421767
Q8R3P0	Aspartoacylase OS=Mus musculus OX=10090 GN=Aspa PE=1 SV=2	3	1	2	1	1	312	35.3	6.58	38	3.89	1	1	0	144.46	151.92	9.46	17.31	160.1	127.3	154.5	135.2	145.2	149.7	127	149.6	195.8	137.5	High	High	High	High	High	High	High	High	High	High	High		0		1.05164	0.60713
Q9Z2W0	Aspartyl aminopeptidase OS=Mus musculus OX=10090 GN=Dnpep PE=1 SV=2	44	17	74	17	1	473	52.2	7.25	714	159.46	17	17	0	7098.6	7604.88	5.2	3.27	7239.4	7211.6	7402.8	6555.4	7083.8	7960	7497.3	7503.6	7320.3	7743.2	High	High	High	High	High	High	High	High	High	High	High		0		1.07132	0.0186058
A2AL78	Aspartyl/asparaginyl beta-hydroxylase OS=Mus musculus OX=10090 GN=Asph PE=1 SV=1	36	6	20	4	1	245	25.9	10.04		76.6		6	0	2084.1	2307.32	3.24	10.32	1973.1	2136	2145.9	2063.6	2101.9	2155.1	2246.3	2128.4	2290.1	2716.7	High	High	High	High	High	High	High	High	High	High	High		0		1.10711	0.103527
Q8BSY0	Aspartyl/asparaginyl beta-hydroxylase OS=Mus musculus OX=10090 GN=Asph PE=1 SV=1	40	25	105	23	1	741	83	5.08	1301	251.64	22	25	2	9838.96	10501.6	4.62	2.55	9167.2	10090.7	9770.5	10493.2	9673.2	10683	10581.9	10232.8	10801.9	10208.2	High	High	High	High	High	High	High	High	High	High	High	Oxidation [P434]	0		1.06734	0.0377316
Q99MQ4	Asporin OS=Mus musculus OX=10090 GN=Aspn PE=1 SV=1	5	2	4	2	1	373	42.5	8.57	0	6.82	1	2	0	623.3	644	4.82	5.21	646.4	570.1	642	634.4	623.6	587.5	642	668.6	668.8	653.1	High	High	High	High	High	High	High	High	High	High	High		0		1.03321	0.390465
Q62048	Astrocytic phosphoprotein PEA-15 OS=Mus musculus OX=10090 GN=Pea15 PE=1 SV=1	65	8	40	8	1	130	15	5.02	276	84.59	8	7	0	4746.04	5197.2	4.06	5.89	4964.4	4619.3	4980.6	4661.2	4504.7	5635.2	5305.5	4806.9	5063	5175.4	High	High	High	High	High	High	High	High	High	High	High		0		1.09506	0.0522203
P28658	Ataxin-10 OS=Mus musculus OX=10090 GN=Atxn10 PE=1 SV=2	13	5	10	5	1	475	53.7	5.25	107	21.3	5	5	0	644.36	605.86	16.93	10.03	530.4	779.5	698.9	707.7	505.3	589.9	534.4	572.6	688.8	643.6	High	High	High	High	High	High	High	High	High	High	High		0		0.940251	0.599926
F6U2C2	Ataxin-2 (Fragment) OS=Mus musculus OX=10090 GN=Atxn2 PE=1 SV=1	9	7	8	1	1	929	100	9		29.92		7	0	16.7	17.78	11.08	21.55	15.2	18.7	18.1	13.9	17.6	14.1	19.9	13.8	22.7	18.4	High	High	High	High	High	High	High	High	High	High	High		0		1.06467	0.643461
O70305	Ataxin-2 OS=Mus musculus OX=10090 GN=Atxn2 PE=1 SV=1	6	7	14	1	1	1285	136.4	9.55	87	24.54	7	7	4	643.7	661.9	7.85	7.01	591.4	681.5	607.8	723.1	614.7	711.8	707.9	610.8	625.7	653.3	High	High	High	High	High	High	High	High	High	High	High		0		1.02827	0.630669
Q7TQH0	Ataxin-2-like protein OS=Mus musculus OX=10090 GN=Atxn2l PE=1 SV=1	3	3	5	3	1	1049	110.6	8.85	27	11.12	2	3	0	360.48	385.14	6.05	8.6	335.9	372.9	341.7	395.6	356.3	420.5	404.1	364.8	338.2	398.1	High	High	High	High	High	High	High	High	High	High	High		0		1.06841	0.345745
Q8BH66	Atlastin-1 OS=Mus musculus OX=10090 GN=Atl1 PE=1 SV=1	4	2	8	1	1	558	63.3	6.49	85	15.9	2	2	0	#DIV/0!	#DIV/0!													High	High	High	High	High	High	High	High	High	High	High		0		#DIV/0!	#DIV/0!
Q6PA06	Atlastin-2 OS=Mus musculus OX=10090 GN=Atl2 PE=1 SV=1	22	12	42	11	1	583	66.2	5.43	375	86.21	10	12	1	4454.12	4453.32	3.04	2.62	4318.6	4475	4641.4	4442.1	4393.5	4602.2	4507.7	4361	4312.1	4483.6	High	High	High	High	High	High	High	High	High	High	High		0		0.99982	0.993764
Q91YH5	Atlastin-3 OS=Mus musculus OX=10090 GN=Atl3 PE=1 SV=1	28	12	28	12	1	541	60.5	6.1	137	60.95	10	12	0	1819.4	1920.4	2.95	5.48	1837.3	1808.5	1878.4	1849.4	1723.4	2086.6	1853	1820.3	1954.1	1888	High	High	High	High	High	High	High	High	High	High	High		0		1.05551	0.125266
Q9CQQ7	ATP synthase F(0) complex subunit B1, mitochondrial OS=Mus musculus OX=10090 GN=Atp5pb PE=1 SV=1	45	20	1012	19	1	256	28.9	9.06	5025	1746.35	17	20	1	125488	127085	1.17	3.18	125247	123706	126395	124569	127524	124125	131689	131217	123344	125048	High	High	High	High	High	High	High	High	High	High	High	Oxidation [P254]	1	Oxidation [P254]	1.01273	0.477235
P56383	ATP synthase F(0) complex subunit C2, mitochondrial OS=Mus musculus OX=10090 GN=Atp5mc2 PE=2 SV=2	5	1	102	1	1	146	15.5	10.35	348	131.09	1	1	0	21853.4	22615.7	9.33	13.26	23127	21872.4	19169.5	21234.7	23863.3	21983.3	24045.6	26674.5	18562.1	21812.8	High	High	High	High	High	High	High	High	High	High	High		0		1.03488	0.706098
Q811I0	ATP synthase mitochondrial F1 complex assembly factor 1 OS=Mus musculus OX=10090 GN=Atpaf1 PE=1 SV=1	49	15	69	15	1	324	36.3	8.19	653	145.15	15	15	0	7092.9	6503.78	11.34	15.21	6256	7819	6653.4	8166	6570.1	6039.6	5790.8	6324.6	8239.8	6124.1	High	High	High	High	High	High	High	High	High	High	High		0		0.916942	0.186526
Q91YY4	ATP synthase mitochondrial F1 complex assembly factor 2 OS=Mus musculus OX=10090 GN=Atpaf2 PE=1 SV=1	24	6	40	6	1	289	33.3	6.32	431	84.6	6	6	0	3712.96	3820.94	2.47	3.6	3736.5	3817.4	3790.1	3568.8	3652	4063.5	3768.5	3793.9	3734.9	3743.9	High	High	High	High	High	High	High	High	High	High	High		0		1.02908	0.177072
P03930	ATP synthase protein 8 OS=Mus musculus OX=10090 GN=Mtatp8 PE=1 SV=1	43	3	87	3	1	67	7.8	9.88	488	129.59	3	3	0	6992.78	7260.52	2.45	2.14	6668.6	7065.5	7052.4	7039.5	7137.9	7157.6	7363.7	7448.8	7271.9	7060.6	High	High	High	High	High	High	High	High	High	High	High		0		1.03829	0.0502878
P00848	ATP synthase subunit a OS=Mus musculus OX=10090 GN=Mtatp6 PE=1 SV=1	4	1	65	1	1	226	25.1	10.43	46	92.98	1	1	0	4711.5	4793.7	2.73	3.94	4756.4	4548.2	4664.8	4663	4925.1	4559.1	4775.9	4700.6	5063.5	4869.4	High	High	High	High	High	High	High	High	High	High	High		0		1.01745	0.478649
Q03265	ATP synthase subunit alpha, mitochondrial OS=Mus musculus OX=10090 GN=Atp5f1a PE=1 SV=1	72	52	5125	52	1	553	59.7	9.19	54224	9703.75	47	52	0	603453	597665	1.83	3.76	607628	592591	593888	605798	617361	584941	620064	623992	577198	582128	High	High	High	High	High	High	High	High	High	High	High	Oxidation [P111; P141; P188; P331; P332; P338; P478]	7	Oxidation [P111; P141; P188; P331; P332; P338; P478]	0.990408	0.705589
P56480	ATP synthase subunit beta, mitochondrial OS=Mus musculus OX=10090 GN=Atp5f1b PE=1 SV=2	77	31	5743	31	1	529	56.3	5.34	80472	12741	31	31	0	363491	356752	1.56	1.54	361416	364567	358009	364572	368890	351752	358571	365523	354129	353786	High	High	High	High	High	High	High	High	High	High	High	Oxidation [P131; P135; P195; P326; P333; P363; P396; P410; P503]	9	Oxidation [P131; P135; P195; P326; P333; P363; P396; P410; P503]	0.981461	0.154689
Q9DCX2	ATP synthase subunit d, mitochondrial OS=Mus musculus OX=10090 GN=Atp5pd PE=1 SV=3	91	17	1005	17	1	161	18.7	5.69	8194	2181.18	17	17	0	129494	131692	2.16	4.97	130801	128785	131983	127665	128235	127917	137758	138472	123066	131246	High	High	High	High	High	High	High	High	High	High	High	Oxidation [P21; P49; P50; P127; P141; P151]	6	Oxidation [P21; P49; P50; P127; P141; P151]	1.01697	0.448264
Q9D3D9	ATP synthase subunit delta, mitochondrial OS=Mus musculus OX=10090 GN=Atp5f1d PE=1 SV=1	41	5	273	5	1	168	17.6	5.08	3785	547.56	5	5	0	38500.5	38516	3.37	6.19	39945.4	36554.6	38999.8	37434.2	39568.4	39782.4	40916.8	39245	34705.2	37930.4	High	High	High	High	High	High	High	High	High	High	High		0		1.0004	0.990399
Q06185	ATP synthase subunit e, mitochondrial OS=Mus musculus OX=10090 GN=Atp5me PE=1 SV=2	79	7	292	6	1	71	8.2	9.35	2674	484.16	7	6	1	46028.6	46566.8	5.38	5.13	46624	42470.1	44076.1	48617.4	48355.4	44875.2	47520	50180.2	44170	46088.7	High	High	High	High	High	High	High	High	High	High	High	Oxidation [P3]	1	Oxidation [P3]	1.01169	0.811493
P56382	ATP synthase subunit epsilon, mitochondrial OS=Mus musculus OX=10090 GN=Atp5f1e PE=1 SV=2	48	4	103	4	1	52	5.8	10.01	272	129.88	4	3	0	18811.5	18899.9	1.7	3.63	19310.4	18374.7	18850.2	18940.2	18582.2	18065.7	19555.7	19405.1	19209.4	18263.7	High	High	High	High	High	High	High	High	High	High	High		0		1.0047	0.840452
P56135	ATP synthase subunit f, mitochondrial OS=Mus musculus OX=10090 GN=Atp5mf PE=1 SV=3	51	5	98	5	1	88	10.3	9.95	430	156.82	4	4	0	11755.5	11356.1	3.78	2.88	11596.5	12350.8	11230.3	11493.6	12106.2	11200.6	11848.4	11427.1	10960.5	11344.1	High	High	High	High	High	High	High	High	High	High	High	Oxidation [P21]	0		0.966029	0.0676739
Q9CPQ8	ATP synthase subunit g, mitochondrial OS=Mus musculus OX=10090 GN=Atp5mg PE=1 SV=1	60	7	226	6	1	103	11.4	9.74	1885	392.84	7	7	0	14394.7	14661.8	3.49	4.55	14494.6	14425.3	14901.1	13827.9	14324.5	14516.2	15324	15052.3	13593.4	14823	High	High	High	High	High	High	High	High	High	High	High	Oxidation [P13; P41; P47]	0		1.01856	0.247049
A2AKU9	ATP synthase subunit gamma OS=Mus musculus OX=10090 GN=Atp5c1 PE=1 SV=1	63	21	902	1	1	297	32.8	9.13		2379.99		21	30	267313	267270	2.19	3.61	271654	261831	265867	261001	276211	259107	280889	274018	261354	260982	High	High	High	High	High	High	High	High	High	High	High		0		0.999841	0.995017
Q91VR2	ATP synthase subunit gamma, mitochondrial OS=Mus musculus OX=10090 GN=Atp5f1c PE=1 SV=1	63	21	1690	1	1	298	32.9	9.01	8689	2333.73	20	21	0	63.64	72.82	25.35	12.38	64.8	83.1	77.1	55.9	37.3	83.8	66.9	69.7	80.7	63	High	High	High	High	High	High	High	High	High	High	High		0		1.14425	0.353474
Q9DB20	ATP synthase subunit O, mitochondrial OS=Mus musculus OX=10090 GN=Atp5po PE=1 SV=1	66	18	1468	8	1	213	23.3	9.99	13029	2622.69	17	18	12	155324	157410	1.27	2.55	153674	154009	157799	153862	157275	152357	161946	160901	156794	155049	High	High	High	High	High	High	High	High	High	High	High	Oxidation [P140; P148]	2	Oxidation [P140; P148]	1.01343	0.315371
Q9CRA7	ATP synthase subunit s, mitochondrial OS=Mus musculus OX=10090 GN=Dmac2l PE=1 SV=1	41	7	28	7	1	200	23.3	8.06	270	62.53	7	7	0	1259.76	1207.32	7.8	13.77	1130.9	1365.8	1208.6	1351.2	1242.3	1123.8	1065	1221.2	1487.4	1139.2	High	High	High	High	High	High	High	High	High	High	High		0		0.958373	0.511401
A0A338P776	ATP synthase, H+-transporting, mitochondrial F1 complex, O subunit (Fragment) OS=Mus musculus OX=10090 GN=Atp5o PE=1 SV=1	63	11	184	1	1	109	12.1	9.89		559.01		11	0	1954.4	1971.98	3.75	5.21	2063.5	1998.2	1911.2	1863.2	1935.9	2009.9	1958.7	1881.4	2127.8	1882.1	High	High	High	High	High	High	High	High	High	High	High		0		1.009	0.790568
P97450	ATP synthase-coupling factor 6, mitochondrial OS=Mus musculus OX=10090 GN=Atp5pf PE=1 SV=1	56	8	451	8	1	108	12.5	9.36	3978	935.24	8	8	0	52414.5	54568.2	5.64	3.58	52451.8	48752.8	56362.5	49827.8	54677.6	55656.4	56218	51319.8	54225.1	55421.6	High	High	High	High	High	High	High	High	High	High	High	Oxidation [P65; P91]	2	Oxidation [P65; P91]	1.04109	0.362885
O54984	ATPase Asna1 OS=Mus musculus OX=10090 GN=Asna1 PE=1 SV=2	34	9	36	9	1	348	38.8	4.91	225	68.73	9	9	0	2222.72	2181.18	4.4	4.05	2135.5	2305	2338.3	2248.3	2086.5	2191.8	2198.5	2074.7	2311.1	2129.8	High	High	High	High	High	High	High	High	High	High	High		0		0.981311	0.549979
Q9D5T0	ATPase family AAA domain-containing protein 1 OS=Mus musculus OX=10090 GN=Atad1 PE=1 SV=1	43	15	91	15	1	361	40.7	6.9	989	203.93	15	15	0	8188.74	8233.3	4.55	2.25	7525.5	8664.8	8152.7	8293	8307.7	8143.5	8423.6	7991.4	8193.7	8414.3	High	High	High	High	High	High	High	High	High	High	High		0		1.00544	0.78736
Q925I1	ATPase family AAA domain-containing protein 3 OS=Mus musculus OX=10090 GN=Atad3 PE=1 SV=1	44	25	118	25	1	591	66.7	9.29	706	241.08	25	24	0	10735.5	11543.7	6.88	4.97	9867.5	11278.4	10707.3	11595.1	10229.4	11513.2	12498.2	11018.9	11189.9	11498.3	High	High	High	High	High	High	High	High	High	High	High		0		1.07528	0.0969846
E9PV44	ATPase inhibitory factor 1 OS=Mus musculus OX=10090 GN=Atpif1 PE=1 SV=1	58	9	35	9	1	74	8.8	9.31		92.45		9	0	12003.9	12317.2	5.69	3.39	11630.7	11081.1	12876.1	11774.3	12657.3	12058.8	12827.2	11764.5	12568.8	12366.9	High	High	High	High	High	High	High	High	High	High	High		0		1.0261	0.552951
Q5SSE9	ATP-binding cassette sub-family A member 13 OS=Mus musculus OX=10090 GN=Abca13 PE=2 SV=1	0	1	1	1	1	5034	568.5	6.52		0		1	0	#DIV/0!	#DIV/0!													High	High	High	High	High	High	High	High	High	High	High		0		#DIV/0!	#DIV/0!
Q8K441	ATP-binding cassette sub-family A member 6 OS=Mus musculus OX=10090 GN=Abca6 PE=1 SV=2	1	1	2	1	1	1624	183.2	6.93	31	4.79	1	1	0	#DIV/0!	#DIV/0!													High	High	High	High	High	High	High	High	High	High	High		0		#DIV/0!	#DIV/0!
Q8K440	ATP-binding cassette sub-family A member 8-B OS=Mus musculus OX=10090 GN=Abca8b PE=1 SV=2	4	5	9	4	1	1620	182.9	7.18	66	16.73	4	5	0	323	330.98	5.76	7.1	337.2	314.1	343.9	326.3	293.5	309.9	302.2	344.8	342.1	355.9	High	High	High	High	High	High	High	High	High	High	High		0		1.02471	0.630608
Q8K449	ATP-binding cassette sub-family A member 9 OS=Mus musculus OX=10090 GN=Abca9 PE=1 SV=2	3	5	11	4	1	1623	183	6.93	27	18.9	4	5	1	758.48	783.66	3.53	4.98	742.9	759.3	771.8	789.4	729	746.7	779	801.6	840.8	750.2	High	High	High	High	High	High	High	High	High	High	High		0		1.0332	0.0318289
Q9JI39	ATP-binding cassette sub-family B member 10, mitochondrial OS=Mus musculus OX=10090 GN=Abcb10 PE=1 SV=1	28	18	86	18	1	715	77.1	9.6	1130	187.79	18	18	0	7346.96	7454.88	1.86	2.4	7165.3	7341.4	7421.1	7247.9	7559.1	7388.7	7646.9	7626.4	7387.9	7224.5	High	High	High	High	High	High	High	High	High	High	High		0		1.01469	0.396413
Q9DC29	ATP-binding cassette sub-family B member 6, mitochondrial OS=Mus musculus OX=10090 GN=Abcb6 PE=1 SV=1	8	6	17	4	1	842	93.7	8.05	179	33.77	6	6	0	150.32	164.02	10.78	7.78	127	143.2	172.1	149.9	159.4	174.9	150.4	155.1	179.8	159.9	High	High	High	High	High	High	High	High	High	High	High		0		1.09114	0.295088
Q61102	ATP-binding cassette sub-family B member 7, mitochondrial OS=Mus musculus OX=10090 GN=Abcb7 PE=1 SV=3	32	22	120	21	1	752	82.5	9.32	1038	239.13	21	22	1	12042.6	12006.1	1.39	2.17	11819.2	12027.2	12111.3	12273.5	11981.8	11989.4	12410.9	12049.2	11868.4	11712.5	High	High	High	High	High	High	High	High	High	High	High		0		0.996967	0.811252
Q9CXJ4	ATP-binding cassette sub-family B member 8, mitochondrial OS=Mus musculus OX=10090 GN=Abcb8 PE=1 SV=1	44	27	175	26	1	717	78	9.07	1500	374.89	26	27	0	16402.6	15953	3.18	4.98	16403	16121	16508.2	15726.8	17254.1	15067	15962.1	16151.4	17148.9	15435.7	High	High	High	High	High	High	High	High	High	High	High		0		0.97259	0.466511
P70170	ATP-binding cassette sub-family C member 9 OS=Mus musculus OX=10090 GN=Abcc9 PE=1 SV=2	21	32	107	28	1	1546	174.1	7.47	620	212.85	29	32	1	7486.34	7486.06	3.28	3.12	7202.8	7634.3	7578	7750.3	7266.3	7094.3	7482	7585.1	7706.8	7562.1	High	High	High	High	High	High	High	High	High	High	High		0		0.999963	0.997337
P48410	ATP-binding cassette sub-family D member 1 OS=Mus musculus OX=10090 GN=Abcd1 PE=1 SV=1	14	9	25	9	1	736	81.8	8.7	291	47.05	9	9	0	1230.3	1244.64	14.5	8.73	970.1	1359.5	1247.1	1469.8	1105	1168.7	1152.1	1211.5	1421.2	1269.7	High	High	High	High	High	High	High	High	High	High	High		0		1.01166	0.857484
P55096	ATP-binding cassette sub-family D member 3 OS=Mus musculus OX=10090 GN=Abcd3 PE=1 SV=2	27	18	47	18	1	659	75.4	9.26	482	98.91	18	17	0	5844.4	5097.78	15.47	7.61	4155.9	6076	6641.9	6568.8	5779.4	5578.7	5224	4556.1	5237	4893.1	High	High	High	High	High	High	High	High	High	High	High		0		0.87225	0.271768
O89016	ATP-binding cassette sub-family D member 4 OS=Mus musculus OX=10090 GN=Abcd4 PE=1 SV=2	2	1	2	1	1	606	68.5	6.42	74	4.61	1	1	0	47.76	51.4	9.4	1.97	42.4	46.8	52.4	53.5	43.7	49.6	52.1	52	51.5	51.8	High	High	High	High	High	High	High	High	High	High	High		0		1.07621	0.149343
P61222	ATP-binding cassette sub-family E member 1 OS=Mus musculus OX=10090 GN=Abce1 PE=1 SV=1	32	18	57	18	1	599	67.3	8.34	420	111.89	18	18	0	4189.36	4325	7.86	2.33	3561.7	4303.7	4388.8	4492.5	4200.1	4344.4	4481.7	4304	4288.6	4206.3	High	High	High	High	High	High	High	High	High	High	High		0		1.03238	0.47771
Q6P542	ATP-binding cassette sub-family F member 1 OS=Mus musculus OX=10090 GN=Abcf1 PE=1 SV=1	11	8	18	8	1	837	94.9	6.51	85	25.87	8	8	0	745.08	767.04	3.02	2.16	726.7	719.8	752.9	763.4	762.6	777.6	756.8	749.4	761.3	790.1	High	High	High	High	High	High	High	High	High	High	High		0		1.02947	0.111162
Q99LE6	ATP-binding cassette sub-family F member 2 OS=Mus musculus OX=10090 GN=Abcf2 PE=1 SV=1	3	2	5	2	1	628	71.7	7.05	30	6.91	2	2	0	308.4	362.84	10.35	11.3	251.7	301.4	324.5	334.7	329.7	376.5	404	368	294	371.7	High	High	High	High	High	High	High	High	High	High	High		0		1.17652	0.13177
Q8K268	ATP-binding cassette sub-family F member 3 OS=Mus musculus OX=10090 GN=Abcf3 PE=1 SV=1	12	8	14	8	1	709	79.8	6.16	65	25.25	6	8	0	632.76	661.32	20.38	23.45	470.2	812.7	594.1	751.1	535.7	575.2	513.7	558.8	828.1	830.8	High	High	High	High	High	High	High	High	High	High	High		0		1.04514	0.784412
Q7TMS5	ATP-binding cassette sub-family G member 2 OS=Mus musculus OX=10090 GN=Abcg2 PE=1 SV=1	3	2	4	2	1	657	72.9	8.54	59	7.77	2	2	0	313.3	340.64	4.4	4.98	312.8	297.6	337.2	316	302.9	350.1	314.2	333.2	350.8	354.9	High	High	High	High	High	High	High	High	High	High	High		0		1.08726	0.047123
E9Q236	ATP-binding cassette, sub-family C (CFTR/MRP), member 4 OS=Mus musculus OX=10090 GN=Abcc4 PE=1 SV=1	9	12	12	11	1	1325	148.8	8.28		39.91		12	0	478.36	478.44	6.25	10.56	459.3	455.4	517.9	481	478.2	419.1	456.1	462.9	502.2	551.9	High	High	High	High	High	High	High	High	High	High	High		0		1.00017	0.997384
B2RUS7	ATP-binding cassette, sub-family C (CFTR/MRP), member 8 OS=Mus musculus OX=10090 GN=Abcc8 PE=1 SV=1	8	11	12	7	1	1588	178	8.19		36.08		11	0	521.08	547.48	15.21	13.7	478	643.8	583.6	463	437	679.3	501.2	532.4	523.3	501.2	High	High	High	High	High	High	High	High	High	High	High		0		1.05066	0.673644
Q3V117	ATP-citrate synthase OS=Mus musculus OX=10090 GN=Acly PE=1 SV=1	31	30	46	2	1	1101	120.7	7.44		181.1		30	0	237.28	228.1	17.57	25.43	303.5	213	230.4	238	201.5	329.5	213.5	215.3	196.5	185.7	High	High	High	High	High	High	High	High	High	High	High		0		0.961312	0.453903
Q91V92	ATP-citrate synthase OS=Mus musculus OX=10090 GN=Acly PE=1 SV=1	31	30	88	1	1	1091	119.7	7.44	672	178.27	28	29	24	7502.78	8166.82	29.35	47.18	11381.2	6281.5	7518.2	6791.4	5541.6	15016.9	6482.7	7132.7	6196.9	6004.9	High	High	High	High	High	High	High	High	High	High	High		0		1.08851	0.435548
Q9CZ42	ATP-dependent (S)-NAD(P)H-hydrate dehydratase OS=Mus musculus OX=10090 GN=Naxd PE=1 SV=1	62	15	108	1	1	343	36.7	7.77	1416	282.79	15	15	17	8752.22	8590.26	4.1	1.54	9178	8906.3	8743.5	8113.8	8819.5	8765	8504.7	8688.5	8547.5	8445.6	High	High	High	High	High	High	High	High	High	High	High	Oxidation [P217]	1	Oxidation [P217]	0.981495	0.376745
P12382	ATP-dependent 6-phosphofructokinase, liver type OS=Mus musculus OX=10090 GN=Pfkl PE=1 SV=4	33	26	202	19	1	780	85.3	7.17	1651	389.75	20	26	0	6204.92	6164.86	2.6	2.93	6476.7	6248.5	6179.7	6052.7	6067	6046.2	6273.5	5912.2	6351.3	6241.1	High	High	High	High	High	High	High	High	High	High	High		0		0.993544	0.782713
P47857	ATP-dependent 6-phosphofructokinase, muscle type OS=Mus musculus OX=10090 GN=Pfkm PE=1 SV=3	58	39	754	33	1	780	85.2	8	8716	1619.58	39	38	8	61731	59590.9	1.43	5.02	61726.3	61721.1	60826.9	63256.2	61124.4	57456.6	62470.9	58015.5	63173.7	56838	High	High	High	High	High	High	High	High	High	High	High	Oxidation [P705]	0		0.965333	0.111925
Q9WUA3	ATP-dependent 6-phosphofructokinase, platelet type OS=Mus musculus OX=10090 GN=Pfkp PE=1 SV=1	41	27	125	22	1	784	85.4	7.11	1227	239.1	26	27	4	7347.16	7706.04	2.93	9.14	7227.4	7553.5	7620.9	7178.6	7155.4	8557.1	7921.6	7869	6627.6	7554.9	High	High	High	High	High	High	High	High	High	High	High		0		1.04885	0.295833
Q9JHS4	ATP-dependent Clp protease ATP-binding subunit clpX-like, mitochondrial OS=Mus musculus OX=10090 GN=Clpx PE=1 SV=2	40	22	71	22	1	634	69.2	7.71	621	147.58	20	22	0	3655.48	3549.76	4.95	6.48	3368.8	3813.3	3687.9	3858.2	3549.2	3517.7	3534.9	3239.6	3887.2	3569.4	High	High	High	High	High	High	High	High	High	High	High		0		0.971079	0.39446
O88696	ATP-dependent Clp protease proteolytic subunit, mitochondrial OS=Mus musculus OX=10090 GN=Clpp PE=1 SV=1	34	7	115	7	1	272	29.8	7.47	1300	258.44	7	7	0	8075.82	7871.52	3.09	3.54	8110.1	8214.4	8263.5	7687.1	8104	8036	8249.9	7628.4	7587.1	7856.2	High	High	High	High	High	High	High	High	High	High	High		0		0.974702	0.155154
Q8VHK9	ATP-dependent DNA/RNA helicase DHX36 OS=Mus musculus OX=10090 GN=Dhx36 PE=1 SV=2	1	1	2	1	1	1001	113.8	8.29	37	3.78	1	1	0	#DIV/0!	#DIV/0!													High	High	High	High	High	High	High	High	High	High	High		0		#DIV/0!	#DIV/0!
E9QNN1	ATP-dependent RNA helicase A OS=Mus musculus OX=10090 GN=Dhx9 PE=1 SV=1	28	29	40	1	1	1384	149.6	6.83		169.55		29	17	3791.26	3987.24	6.83	5.46	3506.7	4011	3893	4080.6	3465	4273.2	4125.7	3709.5	3893.8	3934	High	High	High	High	High	High	High	High	High	High	High		0		1.05169	0.353096
Q91VR5	ATP-dependent RNA helicase DDX1 OS=Mus musculus OX=10090 GN=Ddx1 PE=1 SV=1	34	21	85	21	1	740	82.4	7.21	651	175.17	21	20	0	6739.24	7272.84	4.29	4.87	6259	6615.5	7115.8	6844.3	6861.6	7496.8	7769.3	7123.9	6885.4	7088.8	High	High	High	High	High	High	High	High	High	High	High		0		1.07918	0.122548
Q61655	ATP-dependent RNA helicase DDX19A OS=Mus musculus OX=10090 GN=Ddx19a PE=1 SV=2	18	10	30	9	1	478	53.9	6.67	147	54.44	8	10	0	1817.88	1684.72	15.22	14.11	1466.6	2138.6	1721.7	2134.1	1628.4	1635.1	1513.7	1598.3	2102.4	1574.1	High	High	High	High	High	High	High	High	High	High	High		0		0.92675	0.37072
Q8VDW0	ATP-dependent RNA helicase DDX39A OS=Mus musculus OX=10090 GN=Ddx39a PE=1 SV=1	24	12	38	4	1	427	49	5.68	124	54.36	11	12	0	#DIV/0!	#DIV/0!													High	High	High	High	High	High	High	High	High	High	High		0		#DIV/0!	#DIV/0!
Q62167	ATP-dependent RNA helicase DDX3X OS=Mus musculus OX=10090 GN=Ddx3x PE=1 SV=3	23	14	39	3	1	662	73.1	7.18	311	81.38	10	14	9	2215.36	2155.44	14.12	5.54	1832.4	2541.4	2112.9	2596.5	1993.6	2208.6	2050.2	2008.8	2286.2	2223.4	High	High	High	High	High	High	High	High	High	High	High		0		0.972952	0.730202
Q62095	ATP-dependent RNA helicase DDX3Y OS=Mus musculus OX=10090 GN=Ddx3y PE=1 SV=2	21	12	34	1	1	658	73.4	7.53	301	68.79	9	12	0	#DIV/0!	#DIV/0!													High	High	High	High	High	High	High	High	High	High	High		0		#DIV/0!	#DIV/0!
Q8K4L0	ATP-dependent RNA helicase DDX54 OS=Mus musculus OX=10090 GN=Ddx54 PE=1 SV=1	1	1	1	1	1	874	97.7	10.01		2.35		1	0	443.88	453.92	9.88	7.95	471.7	424.3	510.7	394.9	417.8	501.5	470.7	407.6	431.8	458	Medium	Medium	Medium	Medium	Medium	Medium	Medium	Medium	Medium	Medium	Medium		0		1.02262	0.741643
A2A4P0	ATP-dependent RNA helicase DHX8 OS=Mus musculus OX=10090 GN=Dhx8 PE=2 SV=1	1	1	1	1	1	1244	142.5	8.12		2.87		1	0	143.68	152.32	12.37	5.71	137.7	120.5	168.7	149.9	141.6	150	154.5	166	148.3	142.8	High	High	High	High	High	High	High	High	High	High	High	Oxidation [P902]	0		1.06013	0.27724
Q80YD1	ATP-dependent RNA helicase SUPV3L1, mitochondrial OS=Mus musculus OX=10090 GN=Supv3l1 PE=1 SV=1	8	6	14	6	1	779	87	7.84	55	21.28	6	6	0	1263.9	1228.16	16.64	9.7	998.6	1506.1	1220.2	1496	1098.6	1179.3	1079.6	1235.6	1407.3	1239	High	High	High	High	High	High	High	High	High	High	High		0		0.971722	0.758644
O88967	ATP-dependent zinc metalloprotease YME1L1 OS=Mus musculus OX=10090 GN=Yme1l1 PE=1 SV=1	32	22	69	21	1	715	80	8.97	434	127.62	21	22	0	4879.82	4987.1	3.11	3.2	4642.3	4882.1	4931.4	4984.3	4959	4739.7	5090.8	4911.6	5090.1	5103.3	High	High	High	High	High	High	High	High	High	High	High		0		1.02198	0.045376
Q61743	ATP-sensitive inward rectifier potassium channel 11 OS=Mus musculus OX=10090 GN=Kcnj11 PE=1 SV=1	19	8	25	8	1	390	43.5	8.19	166	43.45	8	8	0	1452.94	1342.84	5.34	2.83	1359.8	1436.1	1500.1	1548	1420.7	1331.9	1330	1313.3	1409.4	1329.6	High	High	High	High	High	High	High	High	High	High	High		0		0.924223	0.0138395
P97794	ATP-sensitive inward rectifier potassium channel 8 OS=Mus musculus OX=10090 GN=Kcnj8 PE=1 SV=1	6	2	4	2	1	424	47.9	9.2	25	10.37	2	2	0	180.76	189.84	3.34	7.47	179.1	178.9	188.4	185.8	171.6	184.1	189.9	188.9	212.5	173.8	High	High	High	High	High	High	High	High	High	High	High		0		1.05023	0.128668
Q6VVW5	Atrial natriuretic peptide receptor 2 OS=Mus musculus OX=10090 GN=Npr2 PE=1 SV=2	1	1	2	1	1	1047	117	6.87	32	3.15	1	1	0	139.64	103.78	71.83	27.93	152.9	100.9	67.3	71.1	306	80.6	150.5	99.6	79.3	108.9	High	High	High	High	High	High	High	High	High	High	High		0		0.743197	0.473761
P70180	Atrial natriuretic peptide receptor 3 OS=Mus musculus OX=10090 GN=Npr3 PE=1 SV=3	6	3	6	3	1	536	59.8	7.09	81	12.89	3	3	0	581.04	577.2	7.77	8.39	630.8	521.1	610.9	598	544.4	603.3	537.8	514.1	604.2	626.6	High	High	High	High	High	High	High	High	High	High	High		0		0.993391	0.901935
Q9Z319	Atrial natriuretic peptide-converting enzyme OS=Mus musculus OX=10090 GN=Corin PE=2 SV=2	6	5	8	5	1	1113	122.9	5.39	40	16.24	3	5	0	709.9	731.9	7.37	8.59	633.1	762.3	726.3	698.4	729.4	725.1	751.7	650.3	709.8	822.6	High	High	High	High	High	High	High	High	High	High	High		0		1.03099	0.532094
Q9Z1N7	AT-rich interactive domain-containing protein 3B OS=Mus musculus OX=10090 GN=Arid3b PE=1 SV=1	4	1	1	1	1	568	61	7.47		2.6		1	0	#DIV/0!	#DIV/0!													High	High	High	High	High	High	High	High	High	High	High	Oxidation [P134; P140]	2	Oxidation [P134; P140]	#DIV/0!	#DIV/0!
Q8BM75	AT-rich interactive domain-containing protein 5B OS=Mus musculus OX=10090 GN=Arid5b PE=1 SV=3	1	1	1	1	1	1188	131.8	8.85		2.26		1	0	226.1	435.58	26.52	100.31	213.2	341.6	215	170	190.7	269.6	164.1	128.8	426	1189.4	Medium	Medium	Medium	Medium	Medium	Medium	Medium	Medium	Medium	Medium	Medium	Oxidation [P1033; P1036]	2	Oxidation [P1033; P1036]	1.92649	0.375851
P56485	Atypical chemokine receptor 3 OS=Mus musculus OX=10090 GN=Ackr3 PE=1 SV=2	4	1	2	1	1	362	41.6	7.37	35	5.12	1	1	0	99.88	101.7	8.24	7.3	93.1	111.2	108.2	94.6	92.3	91.7	99.5	101.2	112.3	103.8	High	High	High	High	High	High	High	High	High	High	High		0		1.01822	0.759558
Q60936	Atypical kinase COQ8A, mitochondrial OS=Mus musculus OX=10090 GN=Coq8a PE=1 SV=2	34	19	192	19	1	645	71.7	6.54	1946	390.42	19	19	0	17171.9	15262.4	19.33	11.21	13175.5	21366.9	15551.7	20381	15384.4	14820	13360.9	15087.2	18052.8	14991.1	High	High	High	High	High	High	High	High	High	High	High	Oxidation [P134]	0		0.888801	0.311214
Q99J83	Autophagy protein 5 OS=Mus musculus OX=10090 GN=Atg5 PE=1 SV=1	5	1	2	1	1	275	32.4	5.91	0	4.74	1	1	0	131.46	117.62	5.91	6.91	132.3	130.8	129.3	142.5	122.4	115.2	125.4	127	109.2	111.3	High	High	High	High	High	High	High	High	High	High	High		0		0.894721	0.0650625
Q8C0J2	Autophagy-related protein 16-1 OS=Mus musculus OX=10090 GN=Atg16l1 PE=1 SV=1	6	4	7	4	1	607	68.1	6.38	42	12.49	3	4	0	646.98	692.88	4.38	5.31	602.7	660.6	670.7	675.6	625.3	751.1	675.5	667.4	663.5	706.9	High	High	High	High	High	High	High	High	High	High	High		0		1.07095	0.206017
Q6P4T0	Autophagy-related protein 2 homolog A OS=Mus musculus OX=10090 GN=Atg2a PE=1 SV=2	1	1	1	1	1	1914	210.8	6.06		3.31		1	0	#DIV/0!	#DIV/0!													Medium	Medium	Medium	Medium	Medium	Medium	Medium	Medium	Medium	Medium	Medium		0		#DIV/0!	#DIV/0!
A0A087WP33	Autophagy-related protein 9 (Fragment) OS=Mus musculus OX=10090 GN=Atg9a PE=1 SV=1	3	2	2	2	1	847	95.2	6.9		6.02		2	0	44.54	43.1	9.34	12.28	42.9	49.5	49.5	40.3	40.5	51.6	42.3	37	42.6	42	High	High	High	High	High	High	High	High	High	High	High		0		0.96767	0.720378
Q8C4Q6	Axin interactor, dorsalization-associated protein OS=Mus musculus OX=10090 GN=Aida PE=1 SV=1	4	1	4	1	1	305	34.9	6.74	45	6.93	1	1	0	57.36	67.34	9.87	14.38	58.6	59.3	65.1	48.4	55.4	65	57.3	65.1	65.8	83.5	High	High	High	High	High	High	High	High	High	High	High		0		1.17399	0.152297
Q60739	BAG family molecular chaperone regulator 1 OS=Mus musculus OX=10090 GN=Bag1 PE=1 SV=3	19	8	20	8	1	355	39.7	8.46	195	42.03	8	8	0	1402.52	1441.34	5.86	2.66	1431.3	1360.9	1513.5	1286.8	1420.1	1488.8	1429.1	1392.7	1425.3	1470.8	High	High	High	High	High	High	High	High	High	High	High		0		1.02768	0.416462
Q91YN9	BAG family molecular chaperone regulator 2 OS=Mus musculus OX=10090 GN=Bag2 PE=1 SV=1	58	13	51	13	1	210	23.5	6.42	257	93.44	13	12	0	4392.2	4564.26	7.42	5.69	3854.4	4436.7	4509.9	4855.9	4304.1	4372.6	4394.6	4372.9	4926.7	4754.5	High	High	High	High	High	High	High	High	High	High	High		0		1.03917	0.262627
Q9JLV1	BAG family molecular chaperone regulator 3 OS=Mus musculus OX=10090 GN=Bag3 PE=1 SV=2	65	29	218	29	1	577	61.8	7.27	2253	446.95	28	29	0	20202.4	18413	8.95	7.83	20763	17081.4	19664.3	20996.7	22506.8	17672.9	18735.6	17325.6	20801.3	17529.6	High	High	High	High	High	High	High	High	High	High	High	Oxidation [P383; P385; P389; P391; P392]	5	Oxidation [P383; P385; P389; P391; P392]	0.911425	0.195391
Q8CI32	BAG family molecular chaperone regulator 5 OS=Mus musculus OX=10090 GN=Bag5 PE=1 SV=1	10	4	9	4	1	447	50.9	6.05	132	21.6	3	4	0	490.74	505	7.39	6.17	489.2	550.2	477.4	498.3	438.6	486.8	497.5	482.5	559.3	498.9	High	High	High	High	High	High	High	High	High	High	High		0		1.02906	0.541444
E9Q7G4	BAH and coiled-coil domain-containing protein 1 OS=Mus musculus OX=10090 GN=Bahcc1 PE=1 SV=1	1	1	3	1	1	2643	282.4	9.03		8.37		1	0	1372.5	1086.44	9.99	9.32	1351.3	1286.2	1350.3	1630	1244.7	1092.6	1176	1051.4	1178.4	933.8	Medium	Medium	Medium	Medium	Medium	Medium	Medium	Medium	Medium	Medium	Medium	Oxidation [P2070; P2074; P2076; P2080]	0		0.791577	0.00638896
P04919	Band 3 anion transport protein OS=Mus musculus OX=10090 GN=Slc4a1 PE=1 SV=1	2	1	2	1	1	929	103.1	5.45	0	4.1	1	1	0	#DIV/0!	#DIV/0!													High	High	High	High	High	High	High	High	High	High	High		0		#DIV/0!	#DIV/0!
Q9Z2H5	Band 4.1-like protein 1 OS=Mus musculus OX=10090 GN=Epb41l1 PE=1 SV=2	3	2	10	1	1	879	98.3	5.62	37	14.46	2	2	0	115.4	125.32	3.61	7.74	117.2	113.2	111	116.3	119.3	130.9	123.1	112	122.8	137.8	High	High	High	High	High	High	High	High	High	High	High		0		1.08596	0.0295345
O70318	Band 4.1-like protein 2 OS=Mus musculus OX=10090 GN=Epb41l2 PE=1 SV=2	47	40	118	36	1	988	109.9	5.43	1116	273.07	37	40	2	8482.22	8827.76	5.5	4.03	9026.6	8655	8287.6	8660.9	7781	9312.1	8680.7	8492.5	9089.8	8563.7	High	High	High	High	High	High	High	High	High	High	High		0		1.04074	0.0532112
A0A286YCT6	Band 4.1-like protein 3 (Fragment) OS=Mus musculus OX=10090 GN=Epb41l3 PE=1 SV=1	30	5	5	1	1	223	24.5	4.63		16.82		5	0	51.82	54.98	13.55	4.75	54.7	48.1	59.9	56	40.4	51.8	57.1	52.5	56.7	56.8	High	High	High	High	High	High	High	High	High	High	High		0		1.06098	0.499819
Q8C1Z7	Bardet-Biedl syndrome 4 protein homolog OS=Mus musculus OX=10090 GN=Bbs4 PE=1 SV=1	5	2	3	1	1	520	58.2	8.1	25	0	2	1	0	35.3	37.7	20.26	12.54	28.4	43.6	40.4	25.5	38.6	41.1	31.2	40.7	34.1	41.4	High	High	High	High	High	High	High	High	High	High	High		0		1.06799	0.605731
O54962	Barrier-to-autointegration factor OS=Mus musculus OX=10090 GN=Banf1 PE=1 SV=1	36	2	7	2	1	89	10.1	6.09	19	16.88	2	2	0	506.24	521.94	17.03	15.09	569.6	595.1	433.1	382.6	550.8	563.7	541.5	432.1	451.9	620.5	High	High	High	High	High	High	High	High	High	High	High		0		1.03101	0.545653
Q3V079	Basal body-orientation factor 1 OS=Mus musculus OX=10090 GN=Bbof1 PE=2 SV=2	1	1	1	1	1	533	62.5	9.19		0		1	0	#DIV/0!	#DIV/0!													High	High	High	High	High	High	High	High	High	High	High		0		#DIV/0!	#DIV/0!
Q9R069	Basal cell adhesion molecule OS=Mus musculus OX=10090 GN=Bcam PE=1 SV=1	46	21	110	21	1	622	67.6	6.25	1431	262.69	19	21	0	10396.1	11031.3	3.32	8.78	10456.3	10780.9	10701.6	10006.2	10035.6	11459.1	10886.3	9835.9	10564.9	12410.4	High	High	High	High	High	High	High	High	High	High	High		0		1.0611	0.299926
E9PZ16	Basement membrane-specific heparan sulfate proteoglycan core protein OS=Mus musculus OX=10090 GN=Hspg2 PE=1 SV=1	28	86	182	86	1	4383	469.5	6.47		766.28		86	0	25338.5	25332.4	5.6	3.29	25074.8	23642.2	27309.6	24446.7	26219.1	25651.2	26532	25215	24280.7	24983.3	High	High	High	High	High	High	High	High	High	High	High	Oxidation [P2431]	1	Oxidation [P2431]	0.999762	0.994703
Q9CQC6	Basic leucine zipper and W2 domain-containing protein 1 OS=Mus musculus OX=10090 GN=Bzw1 PE=1 SV=1	27	15	33	11	1	419	48	5.92	192	57.33	12	13	0	1842.82	1928.68	10.68	4.71	1538.6	2077.6	1861.8	2017.5	1718.6	1999.8	1828.7	1831.1	2005.6	1978.2	High	High	High	High	High	High	High	High	High	High	High		0		1.04659	0.525976
Q91VK1	Basic leucine zipper and W2 domain-containing protein 2 OS=Mus musculus OX=10090 GN=Bzw2 PE=1 SV=1	55	24	76	20	1	419	48	6.68	648	152.83	19	23	1	7901.66	7901.5	10.09	6.2	6617	8954.7	7804.3	8491.1	7641.2	7864.4	7194.1	7774.8	8162.3	8511.9	High	High	High	High	High	High	High	High	High	High	High		0		0.99998	0.999772
P18572	Basigin OS=Mus musculus OX=10090 GN=Bsg PE=1 SV=2	27	10	129	10	1	389	42.4	5.85	1024	285.04	10	10	0	16726.6	18415.5	3.98	9.8	16213	17721	16720.6	16921.9	16056.5	20056.3	18827	19177.2	15330.1	18686.8	High	High	High	High	High	High	High	High	High	High	High		0		1.10097	0.142857
Q9D2C7	Bax inhibitor 1 OS=Mus musculus OX=10090 GN=Tmbim6 PE=1 SV=1	3	1	2	1	1	237	26.5	8.73	0	3.24	1	1	0	#DIV/0!	#DIV/0!													High	High	High	High	High	High	High	High	High	High	High		0		#DIV/0!	#DIV/0!
O88282	B-cell CLL/lymphoma 6 member B protein OS=Mus musculus OX=10090 GN=Bcl6b PE=1 SV=1	3	1	3	1	1	474	51.3	9.19		5.41		1	0	14.62	16.48	15.65	11.91	16.7	14	13.7	15	13.7	13.9	17.2	19.2	16.3	15.8	High	High	High	High	High	High	High	High	High	High	High	Oxidation [P48]	0		1.12722	0.243969
Q61334	B-cell receptor-associated protein 29 OS=Mus musculus OX=10090 GN=Bcap29 PE=1 SV=1	20	7	23	7	1	240	27.9	9.72	107	39.24	6	7	0	1590.76	1624.86	4.98	4.63	1454	1632.9	1611.1	1680.1	1575.7	1556.4	1565.3	1665	1735.7	1601.9	High	High	High	High	High	High	High	High	High	High	High		0		1.02144	0.293419
Q61335	B-cell receptor-associated protein 31 OS=Mus musculus OX=10090 GN=Bcap31 PE=1 SV=4	49	15	88	14	1	245	27.9	8.7	487	151.22	14	15	0	8235.98	8789.92	5.37	3.86	7724.7	8476.6	8591.3	8687.6	7699.7	9132.3	8883.4	8283	9017.6	8633.3	High	High	High	High	High	High	High	High	High	High	High		0		1.06726	0.129242
O08734	Bcl-2 homologous antagonist/killer OS=Mus musculus OX=10090 GN=Bak1 PE=1 SV=3	16	2	8	2	1	209	23.3	6.18	173	23.94	2	2	0	198.2	171.52	7.08	4.72	192.9	206.1	198.2	205.4	188.4	175.6	167.3	170.7	182.6	161.4	High	High	High	High	High	High	High	High	High	High	High		0		0.865388	0.0016609
O54940	BCL2/adenovirus E1B 19 kDa protein-interacting protein 2 OS=Mus musculus OX=10090 GN=Bnip2 PE=1 SV=2	4	2	4	2	1	326	37.7	4.97	0	4.16	2	2	0	132.58	153.06	11.78	27.43	127.9	151	137.3	139.3	107.4	132.3	123.7	120.1	169.9	219.3	High	High	High	High	High	High	High	High	High	High	High		0		1.15447	0.457356
O55003	BCL2/adenovirus E1B 19 kDa protein-interacting protein 3 OS=Mus musculus OX=10090 GN=Bnip3 PE=1 SV=1	17	3	10	3	1	187	21	7.14	128	22.55	3	3	0	884.32	818.6	6.5	12.66	814.6	825	948.8	900	933.2	728.8	736.2	925.1	936.8	766.1	High	High	High	High	High	High	High	High	High	High	High		0		0.925683	0.127614
Q8K019	Bcl-2-associated transcription factor 1 OS=Mus musculus OX=10090 GN=Bclaf1 PE=1 SV=2	5	4	8	4	1	919	105.9	9.99	76	12.86	4	4	0	703.82	719.54	5.48	3.95	641.2	696.9	715.6	736.5	728.9	733.6	754.3	686.6	729.2	694	High	High	High	High	High	High	High	High	High	High	High		0		1.02234	0.566687
Q64373	Bcl-2-like protein 1 OS=Mus musculus OX=10090 GN=Bcl2l1 PE=1 SV=1	5	1	2	1	1	233	26.1	4.94	43	4.1	1	1	0	74.84	79.1	8.39	7.39	64.8	71.1	81.5	79.8	77	82.6	73.7	72.4	85.9	80.9	High	High	High	High	High	High	High	High	High	High	High		0		1.05692	0.37692
P59017	Bcl-2-like protein 13 OS=Mus musculus OX=10090 GN=Bcl2l13 PE=1 SV=2	41	14	105	14	1	434	46.7	4.59	1150	263.36	13	14	0	14097.6	13831.2	12.22	8.18	13557.1	15545.6	12300.8	16533.4	12550.9	14660.4	13274.5	15383.3	13082.1	12755.5	High	High	High	High	High	High	High	High	High	High	High	Oxidation [P334]	1	Oxidation [P334]	0.981103	0.831344
Q8CGN4	BCL-6 corepressor OS=Mus musculus OX=10090 GN=Bcor PE=1 SV=2	1	1	1	1	1	1759	192.5	6.54		2.7		1	0	153.26	155.04	7.8	10.02	149.5	139.7	168.2	151.6	157.3	146.7	162	151.2	137.4	177.9	Medium	Medium	Medium	Medium	Medium	Medium	Medium	Medium	Medium	Medium	Medium		0		1.01161	0.842161
O88597	Beclin-1 OS=Mus musculus OX=10090 GN=Becn1 PE=1 SV=3	2	1	2	1	1	448	51.6	4.93	22	2.95	1	1	0	93.38	113.6	12.04	16.74	92.5	95.2	113	85.5	80.7	143.3	103.4	92.7	117.8	110.8	High	High	High	High	High	High	High	High	High	High	High		0		1.21653	0.172118
O35153	BET1-like protein OS=Mus musculus OX=10090 GN=Bet1l PE=3 SV=1	25	2	4	2	1	111	12.4	8.82	37	9.14	2	2	0	246.96	262.2	7.49	8.57	249.1	238.3	280.8	236.7	229.9	281.1	236.8	242.2	264	286.9	High	High	High	High	High	High	High	High	High	High	High		0		1.06171	0.404156
A0A338P6N4	Beta/gamma crystallin domain-containing protein 3 OS=Mus musculus OX=10090 GN=Crybg3 PE=1 SV=1	2	5	5	5	1	2952	325.3	5.11		16.5		5	0	145.6	142.74	6.76	7.27	136.1	144	164	142	141.9	156.3	150.5	139.6	131.2	136.1	High	High	High	High	High	High	High	High	High	High	High		0		0.980357	0.725773
Q8BHT6	Beta-1,3-glucosyltransferase OS=Mus musculus OX=10090 GN=B3glct PE=1 SV=3	3	2	4	1	1	489	55.3	6.92	0	7.73	1	2	0	#DIV/0!	#DIV/0!													High	High	High	High	High	High	High	High	High	High	High		0		#DIV/0!	#DIV/0!
Q09199	Beta-1,4 N-acetylgalactosaminyltransferase 2 OS=Mus musculus OX=10090 GN=B4galnt2 PE=2 SV=1	1	1	1	1	1	510	58.3	8.94	20		1		0	297.92	312.76	3.53	18.12	298.8	315.4	287.9	289.2	298.3	275	283.7	277.8	318	409.3	Medium	Medium	Medium	Medium	Medium	Medium	Medium	Medium	Medium	Medium	Medium		0		1.04981	0.601304
Q8BWP8	Beta-1,4-glucuronyltransferase 1 OS=Mus musculus OX=10090 GN=B4gat1 PE=1 SV=1	4	2	4	2	1	415	47.4	7.27	23	5.67	2	2	0	126.54	133.8	8.18	6.49	126.6	130.1	139.3	113.9	122.8	139.3	134	130.4	144	121.3	High	High	High	High	High	High	High	High	High	High	High		0		1.05737	0.340124
Q99L88	Beta-1-syntrophin OS=Mus musculus OX=10090 GN=Sntb1 PE=1 SV=4	6	4	8	2	1	537	58	8.31	27	11.7	4	4	0	156.28	166.34	13.63	10.82	132	179.4	172.1	168.3	129.6	179	177.6	149.5	144.1	181.5	High	High	High	High	High	High	High	High	High	High	High		0		1.06437	0.57671
Q01339	Beta-2-glycoprotein 1 OS=Mus musculus OX=10090 GN=Apoh PE=1 SV=1	8	2	6	2	1	345	38.6	8.22	0	11.83	2	2	0	63	64.48	16.08	24	80.1	68.3	56	58.9	51.7	50.9	58.1	53.9	70.9	88.6	High	High	High	High	High	High	High	High	High	High	High		0		1.02349	0.900199
P01887	Beta-2-microglobulin OS=Mus musculus OX=10090 GN=B2m PE=1 SV=2	8	1	2	1	1	119	13.8	8.44	37	4.55	1	1	0	198.6	236.06	10.13	10.11	229.4	199.2	206.2	173.8	184.4	255.2	201.2	228.4	261.3	234.2	High	High	High	High	High	High	High	High	High	High	High		0		1.18862	0.0626406
Q61235	Beta-2-syntrophin OS=Mus musculus OX=10090 GN=Sntb2 PE=1 SV=2	13	6	11	4	1	520	56.3	8.69	38	21.28	5	6	0	438.26	454.92	5.52	7.44	433.2	441.8	464.2	452.8	399.3	441	417	439.3	503.3	474	High	High	High	High	High	High	High	High	High	High	High		0		1.03801	0.452696
Q99MK8	Beta-adrenergic receptor kinase 1 OS=Mus musculus OX=10090 GN=Grk2 PE=1 SV=2	1	1	1	1	1	689	79.6	7.28	0		1		0	#DIV/0!	#DIV/0!													Medium	Medium	Medium	Medium	Medium	Medium	Medium	Medium	Medium	Medium	Medium	Oxidation [P671]	1	Oxidation [P671]	#DIV/0!	#DIV/0!
Q8BWG8	Beta-arrestin-1 OS=Mus musculus OX=10090 GN=Arrb1 PE=1 SV=1	15	6	9	6	1	418	46.9	6.28	37	18.21	3	6	0	611.2	630.8	3.71	6.19	610.4	594.9	645.4	621.4	583.9	643.7	603.7	595.7	692.6	618.3	High	High	High	High	High	High	High	High	High	High	High		0		1.03207	0.382263
Q9CWL8	Beta-catenin-like protein 1 OS=Mus musculus OX=10090 GN=Ctnnbl1 PE=1 SV=1	1	1	2	1	1	563	64.9	5.07	0	3.07	1	1	0	199.1	204.28	15.28	8.07	178.2	234.6	196.1	228.9	157.7	220.4	189.1	184.2	211.7	216	High	High	High	High	High	High	High	High	High	High	High		0		1.02602	0.802993
Q8R5C5	Beta-centractin OS=Mus musculus OX=10090 GN=Actr1b PE=1 SV=1	26	12	38	8	1	376	42.3	6.4	158	71.87	9	12	1	2467.68	2565.86	6.76	7.35	2314.1	2771.7	2339.9	2512.4	2400.3	2524.7	2519.6	2294.2	2755.8	2735	High	High	High	High	High	High	High	High	High	High	High		0		1.03979	0.414536
P21550	Beta-enolase OS=Mus musculus OX=10090 GN=Eno3 PE=1 SV=3	78	36	1790	24	1	434	47	7.18	22017	3920.62	36	36	18	174453	177297	1.25	6.53	175836	173873	174679	172697	175182	187543	186447	179842	159271	173381	High	High	High	High	High	High	High	High	High	High	High	Oxidation [P36; P146; P215; P267]	0		1.0163	0.587023
P23780	Beta-galactosidase OS=Mus musculus OX=10090 GN=Glb1 PE=1 SV=1	8	4	10	4	1	647	73.1	7.47	69	20.04	4	4	0	687.86	712.58	5.92	4.41	709.8	681.7	743.3	621.2	683.3	755.7	713.9	693.4	726.4	673.5	High	High	High	High	High	High	High	High	High	High	High		0		1.03594	0.399038
A8DUK4	Beta-globin OS=Mus musculus OX=10090 GN=Hbb-bs PE=1 SV=1	88	11	190	3	1	147	15.7	7.69		837.79		11	15	25766.3	26275.5	31.86	10.09	39674.8	27181	24490	20049	17436.8	28587.3	28821.3	27025.7	23481.8	23461.6	High	High	High	High	High	High	High	High	High	High	High		0		1.01976	0.873048
P12265	Beta-glucuronidase OS=Mus musculus OX=10090 GN=Gusb PE=1 SV=2	5	3	6	3	1	648	74.1	6.7	35	10.03	3	3	0	262.22	282.46	3.45	5.92	260.5	254.7	271.4	259.2	265.3	305.6	268.5	271.4	295	271.8	High	High	High	High	High	High	High	High	High	High	High		0		1.07719	0.0796329
P20060	Beta-hexosaminidase subunit beta OS=Mus musculus OX=10090 GN=Hexb PE=1 SV=2	1	1	2	1	1	536	61.1	8.12	18	2.8	1	1	0	#DIV/0!	#DIV/0!													High	High	High	High	High	High	High	High	High	High	High		0		#DIV/0!	#DIV/0!
Q8K2I4	Beta-mannosidase OS=Mus musculus OX=10090 GN=Manba PE=1 SV=1	5	5	10	5	1	879	100.8	7.25	67	16.97	4	4	0	800.18	784.32	3.93	7.08	767.6	781	832.1	776.4	843.8	707.7	812	764.2	857	780.7	High	High	High	High	High	High	High	High	High	High	High		0		0.980179	0.628494
Q9ES46	Beta-parvin OS=Mus musculus OX=10090 GN=Parvb PE=1 SV=1	31	9	32	7	1	365	41.6	6.33	279	72.29	9	9	2	2311.84	2286.02	12.29	6.76	1965.5	2677.9	2233.5	2603.6	2078.7	2389.7	2038.8	2242.3	2425.9	2333.4	High	High	High	High	High	High	High	High	High	High	High		0		0.988831	0.895526
P82349	Beta-sarcoglycan OS=Mus musculus OX=10090 GN=Sgcb PE=1 SV=1	25	7	37	7	1	320	34.9	8.6	462	96.19	6	7	0	2017.02	1900.82	4.48	3.46	1945.7	2081.4	2113.5	2067.6	1876.9	1836.8	1938.1	1925.5	1976.6	1827.1	High	High	High	High	High	High	High	High	High	High	High		0		0.94239	0.00771858
Q8VBT1	Beta-taxilin OS=Mus musculus OX=10090 GN=Txlnb PE=1 SV=2	54	33	178	31	1	685	77.2	5.01	1558	363.27	28	33	2	15972.9	15980.4	4.38	3.16	15989	17088.1	15990	15821.1	14976.4	16219.6	15196.3	15819.9	16141.3	16525.1	High	High	High	High	High	High	High	High	High	High	High		0		1.00047	0.989839
Q60967	Bifunctional 3'-phosphoadenosine 5'-phosphosulfate synthase 1 OS=Mus musculus OX=10090 GN=Papss1 PE=1 SV=1	3	1	1	1	1	624	70.7	6.77		2.7		1	0	#DIV/0!	#DIV/0!													High	High	High	High	High	High	High	High	High	High	High		0		#DIV/0!	#DIV/0!
O88428	Bifunctional 3'-phosphoadenosine 5'-phosphosulfate synthase 2 OS=Mus musculus OX=10090 GN=Papss2 PE=1 SV=2	10	5	12	5	1	621	70.3	7.58	60	26.51	5	5	0	681.44	718.02	4.44	8.19	706.3	662.5	706.5	696.4	635.5	694	685.9	655.6	802.9	751.7	High	High	High	High	High	High	High	High	High	High	High		0		1.05368	0.326505
Q9DBL7	Bifunctional coenzyme A synthase OS=Mus musculus OX=10090 GN=Coasy PE=1 SV=2	16	7	17	7	1	563	62	7.11	93	38.71	5	7	0	550.38	562.4	8.32	8.65	481.3	614.6	545.4	577.7	532.9	583.3	503.1	539.5	632.5	553.6	High	High	High	High	High	High	High	High	High	High	High		0		1.02184	0.753687
P34914	Bifunctional epoxide hydrolase 2 OS=Mus musculus OX=10090 GN=Ephx2 PE=1 SV=2	66	24	527	24	1	554	62.5	6.19	5785	1232.22	23	24	0	34007.5	30090.4	7.05	3.94	30309.9	34479.1	36508.1	34701.8	34038.6	28587.6	30219.5	29641.2	31859.6	30144	High	High	High	High	High	High	High	High	High	High	High	Oxidation [P46; P362; P363; P365]	0		0.884816	0.0103794
Q8CGC7	Bifunctional glutamate/proline--tRNA ligase OS=Mus musculus OX=10090 GN=Eprs PE=1 SV=4	51	75	346	71	1	1512	170	7.66	2366	689.14	70	75	2	38183.9	38648.1	3.12	3.84	36511.3	38865.8	39492.9	38930.2	37119.2	39795.1	40601.5	37862.7	37058.3	37922.7	High	High	High	High	High	High	High	High	High	High	High	Oxidation [P1120]	0		1.01216	0.662977
P0C872	Bifunctional peptidase and (3S)-lysyl hydroxylase Jmjd7 OS=Mus musculus OX=10090 GN=Jmjd7 PE=1 SV=1	10	2	4	2	1	316	35.9	5.47	31	7.82	2	2	0	156.38	154.46	6.94	9.05	154.8	141	157.4	161.4	167.3	138.7	151	160.8	146.8	175	High	High	High	High	High	High	High	High	High	High	High		0		0.987722	0.748505
Q9CWJ9	Bifunctional purine biosynthesis protein PURH OS=Mus musculus OX=10090 GN=Atic PE=1 SV=2	53	25	115	25	1	592	64.2	6.76	1308	259.76	24	24	0	11466.5	11804.2	4.76	4.88	11979.9	11039.1	11723.6	10631.2	11958.7	11684.8	11123.1	12720.8	11701.5	11790.6	High	High	High	High	High	High	High	High	High	High	High		0		1.02945	0.310277
P28653	Biglycan OS=Mus musculus OX=10090 GN=Bgn PE=1 SV=1	23	8	32	7	1	369	41.6	7.27	339	65.35	8	8	0	1640.08	1728.58	10.51	17.61	1597.9	1371.4	1802.1	1849.5	1579.5	1677.9	1506.6	1667.4	2255.6	1535.4	High	High	High	High	High	High	High	High	High	High	High		0		1.05396	0.392116
Q9QY30	Bile salt export pump OS=Mus musculus OX=10090 GN=Abcb11 PE=1 SV=2	1	1	2	1	1	1321	146.7	7.66	39	6.04	1	1	0	105.98	129.72	30.26	41.01	70.9	152.1	100.5	73.6	132.8	221.1	84.1	125.9	107.9	109.6	High	High	High	High	High	High	High	High	High	High	High		0		1.224	0.551471
Q9CY64	Biliverdin reductase A OS=Mus musculus OX=10090 GN=Blvra PE=1 SV=1	37	11	44	11	1	295	33.5	7.02	396	92.71	9	11	0	3391.76	3455.5	2.76	4.4	3384.7	3265.2	3495.3	3347.9	3465.7	3595.2	3318.8	3641.6	3389.5	3332.4	High	High	High	High	High	High	High	High	High	High	High		0		1.01879	0.335039
Q6P1B9	Bin1 protein OS=Mus musculus OX=10090 GN=Bin1 PE=1 SV=1	13	5	6	5	1	477	52.7	5.24		23.3		5	0	723.5	820	4.18	4.33	720.1	712	736.8	756.7	691.9	875.3	803.5	784.2	803.8	833.2	High	High	High	High	High	High	High	High	High	High	High		0		1.13338	0.0131965
O55102	Biogenesis of lysosome-related organelles complex 1 subunit 1 OS=Mus musculus OX=10090 GN=Bloc1s1 PE=1 SV=2	8	1	2	1	1	125	14.3	8.15	0	3.09	1	1	0	171.72	166.74	5.13	7.49	157.3	182	172.7	173.5	173.1	153.5	154.2	168.7	176.8	180.5	High	High	High	High	High	High	High	High	High	High	High		0		0.970999	0.460307
Q9CWG9	Biogenesis of lysosome-related organelles complex 1 subunit 2 OS=Mus musculus OX=10090 GN=Bloc1s2 PE=1 SV=1	6	1	2	1	1	143	16.3	4.88	0	2.59	1	1	0	#DIV/0!	#DIV/0!													High	High	High	High	High	High	High	High	High	High	High		0		#DIV/0!	#DIV/0!
Q5U5M8	Biogenesis of lysosome-related organelles complex 1 subunit 3 OS=Mus musculus OX=10090 GN=Bloc1s3 PE=1 SV=1	9	2	3	2	1	195	20.4	4.92	0	4.87	1	2	0	210.04	216.4	9.38	2.6	216.7	205.7	239.4	191.9	196.5	216.3	213.8	212.3	213.5	226.1	High	High	High	High	High	High	High	High	High	High	High		0		1.03028	0.553676
Q8VED2	Biogenesis of lysosome-related organelles complex 1 subunit 4 OS=Mus musculus OX=10090 GN=Bloc1s4 PE=1 SV=1	16	3	5	3	1	215	23.1	5.14	19	7.72	2	3	0	104.4	102.38	8.31	9.6	94.2	103.7	95.6	114.6	113.9	89.8	100.8	110.1	114.1	97.1	High	High	High	High	High	High	High	High	High	High	High		0		0.980651	0.70691
Q8R015	Biogenesis of lysosome-related organelles complex 1 subunit 5 OS=Mus musculus OX=10090 GN=Bloc1s5 PE=1 SV=1	4	1	1	1	1	185	21.3	7.34		0		1	0	#DIV/0!	#DIV/0!													High	High	High	High	High	High	High	High	High	High	High		0		#DIV/0!	#DIV/0!
Q5SQY2	Biorientation of chromosomes in cell division protein 1 OS=Mus musculus OX=10090 GN=Bod1 PE=3 SV=1	34	4	9	4	1	173	18.4	5.9	35	18.35	3	4	0	431.08	448.38	5.09	3.61	425.6	423.4	445	401.9	459.5	441.1	446	437.8	440.1	476.9	High	High	High	High	High	High	High	High	High	High	High		0		1.04013	0.0770743
Q8CIF4	Biotinidase OS=Mus musculus OX=10090 GN=Btd PE=1 SV=2	4	2	4	2	1	520	58.1	5.8	41	7.7	2	2	0	61.14	64.86	8.42	13.02	65.3	65.2	62.7	54.2	58.3	76.4	66.7	64.7	52.7	63.8	High	High	High	High	High	High	High	High	High	High	High		0		1.06084	0.159191
Q8BTJ4	Bis(5'-adenosyl)-triphosphatase enpp4 OS=Mus musculus OX=10090 GN=Enpp4 PE=1 SV=1	8	3	12	3	1	456	51.6	6.73	199	21.41	3	3	0	316.8	326.24	3.42	5.9	310.1	307.1	322.9	314.2	329.7	348.9	322.1	301.1	341.8	317.3	High	High	High	High	High	High	High	High	High	High	High		0		1.0298	0.460224
O89106	Bis(5'-adenosyl)-triphosphatase OS=Mus musculus OX=10090 GN=Fhit PE=1 SV=3	24	3	8	3	1	150	17.2	6.73	157	19.09	3	3	0	501.5	516.54	8.3	8.47	498.7	559.1	497.8	434.6	517.3	561.4	490.8	467	499.6	563.9	High	High	High	High	High	High	High	High	High	High	High		0		1.02999	0.609908
P56380	Bis(5'-nucleosyl)-tetraphosphatase [asymmetrical] OS=Mus musculus OX=10090 GN=Nudt2 PE=1 SV=3	57	7	39	7	1	147	17	6.28	642	94.95	6	7	0	2316.56	2365.6	2.5	7.02	2312.5	2326.4	2389.6	2243.6	2310.7	2182.2	2245.6	2321.8	2533.9	2544.5	High	High	High	High	High	High	High	High	High	High	High		0		1.02117	0.607203
P15327	Bisphosphoglycerate mutase OS=Mus musculus OX=10090 GN=Bpgm PE=1 SV=2	18	4	10	4	1	259	30	7.06	75	20.07	4	4	0	881.12	848.54	9.18	4.06	1030.9	854.7	882.4	839.3	798.3	902.3	853.8	825.8	812.3	848.5	High	High	High	High	High	High	High	High	High	High	High		0		0.963024	0.33477
Q8R016	Bleomycin hydrolase OS=Mus musculus OX=10090 GN=Blmh PE=1 SV=1	35	13	48	13	1	455	52.5	6.48	310	103.39	13	13	0	3495.38	3604.38	2.92	6.75	3483.2	3605.2	3590.8	3477	3320.7	3759.2	3895.2	3433.4	3292.3	3641.8	High	High	High	High	High	High	High	High	High	High	High		0		1.03118	0.395561
Q9D920	BLOC-1-related complex subunit 5 OS=Mus musculus OX=10090 GN=Borcs5 PE=1 SV=1	27	4	7	4	1	195	22.1	6.55	65	16.79	3	4	0	462.48	454.42	4.15	7.16	433.3	448.5	467.7	477.7	485.2	409.1	442	455.4	497.2	468.4	High	High	High	High	High	High	High	High	High	High	High		0		0.982572	0.341475
Q9D6W8	BLOC-1-related complex subunit 6 OS=Mus musculus OX=10090 GN=Borcs6 PE=1 SV=1	19	5	12	4	1	360	38	5.34	161	26.53	5	5	0	330.8	327.24	7.01	3.07	297.2	363	347.7	318.4	327.7	340.8	312.8	325.9	330.5	326.2	High	High	High	High	High	High	High	High	High	High	High		0		0.989238	0.832591
Q9CRC6	BLOC-1-related complex subunit 7 OS=Mus musculus OX=10090 GN=Borcs7 PE=1 SV=1	38	3	6	3	1	105	11.5	6.79	73	13.47	3	3	0	526.48	554.08	9.31	7.52	485.2	549.2	595.8	460.2	542	588.2	528.2	508.7	538.3	607	High	High	High	High	High	High	High	High	High	High	High		0		1.05242	0.479873
Q9D6Y4	BLOC-1-related complex subunit 8 OS=Mus musculus OX=10090 GN=Borcs8 PE=1 SV=1	13	2	4	2	1	120	13.6	6.54	0	2.09	2	1	0	284.26	269.9	9.05	7.32	263.1	314.4	293.4	304.3	246.1	238.2	281.6	271.6	267.9	290.2	High	High	High	High	High	High	High	High	High	High	High		0		0.949483	0.388271
Q9ES83	Blood vessel epicardial substance OS=Mus musculus OX=10090 GN=Bves PE=1 SV=1	26	10	66	10	1	358	41	7.31	500	158.59	10	10	0	4759.54	5236.28	4.6	6.69	4523.8	5110.9	4903.4	4653.3	4606.3	5588.6	5526.7	5172.5	4711.4	5182.2	High	High	High	High	High	High	High	High	High	High	High	Oxidation [P334]	0		1.10017	0.0485637
Q9D0L6	BMP and activin membrane-bound inhibitor homolog OS=Mus musculus OX=10090 GN=Bambi PE=2 SV=1	9	1	1	1	1	260	29.2	7.59	0		1		0	112.6	116.96	7.88	6.32	115	107.4	112.6	102.3	125.7	113	125.7	106.7	121.4	118	High	High	High	High	High	High	High	High	High	High	High	Oxidation [P94]	0		1.03872	0.502816
Q9D8S9	BolA-like protein 1 OS=Mus musculus OX=10090 GN=Bola1 PE=1 SV=1	57	6	35	6	1	137	14.4	8.76	599	105.23	6	6	0	2674.28	2749.04	4.82	5.71	2778.1	2485.6	2762	2578.2	2767.5	2554.9	2614.9	2817.7	2831.2	2926.5	High	High	High	High	High	High	High	High	High	High	High		0		1.02796	0.407876
Q8BGS2	BolA-like protein 2 OS=Mus musculus OX=10090 GN=Bola2 PE=1 SV=1	71	5	11	5	1	86	10.2	6.16	143	29.16	4	5	0	651.78	659.86	7.08	2.33	668.6	639.3	699	585	667	661.9	650.5	677.2	638.9	670.8	High	High	High	High	High	High	High	High	High	High	High		0		1.0124	0.559969
Q8CEI1	BolA-like protein 3 OS=Mus musculus OX=10090 GN=Bola3 PE=1 SV=1	54	7	74	7	1	110	12.2	8.97	712	176.39	5	7	0	5229.62	5461.48	4.86	1.97	5335.6	4912.2	5373.9	4977	5549.4	5520.8	5375.3	5354.2	5442.9	5614.2	High	High	High	High	High	High	High	High	High	High	High		0		1.04434	0.082096
Q99KU6	Bombesin receptor-activated protein C6orf89 homolog OS=Mus musculus OX=10090 PE=2 SV=2	14	4	8	4	1	348	39.5	6.62	39	13.54	4	4	0	218.06	226.6	8.08	11.47	249.4	204.3	200.1	223.2	213.3	210.6	201.5	239.1	265.9	215.9	High	High	High	High	High	High	High	High	High	High	High		0		1.03916	0.599565
Q8R2Q8	Bone marrow stromal antigen 2 OS=Mus musculus OX=10090 GN=Bst2 PE=1 SV=1	12	3	10	3	1	172	19.1	7.34	26	15.38	2	3	0	110.6	114.2	10.5	16.17	96.8	114.1	130.4	110.2	101.5	145.8	105.1	111.6	110.4	98.1	High	High	High	High	High	High	High	High	High	High	High		0		1.03255	0.775418
Q9R229	Bone morphogenetic protein 10 OS=Mus musculus OX=10090 GN=Bmp10 PE=1 SV=2	24	9	30	9	1	421	47.9	4.84	453	69.3	9	9	0	1206.64	1261.4	11.1	12.58	1341.7	1130.7	1251.1	1202.9	1106.8	1292.7	1091.7	1103.3	1378.2	1441.1	High	High	High	High	High	High	High	High	High	High	High		0		1.04538	0.565528
Q8BHE5	Bone morphogenetic protein 3 OS=Mus musculus OX=10090 GN=Bmp3 PE=1 SV=1	1	1	2	1	1	468	52.7	9.38	0	2.11	1	1	0	172.58	197.64	8.15	12.51	150.5	171.4	176.4	194.3	170.3	206.1	234.2	191.2	167.2	189.5	High	High	High	High	High	High	High	High	High	High	High		0		1.14521	0.195709
Q8C186	BPI fold-containing family C protein OS=Mus musculus OX=10090 GN=Bpifc PE=2 SV=1	1	1	1	1	1	509	56.6	6.29		2.87		1	0	#DIV/0!	#DIV/0!													High	High	High	High	High	High	High	High	High	High	High		0		#DIV/0!	#DIV/0!
A0A338P791	Brachyury 2 OS=Mus musculus OX=10090 GN=T2 PE=4 SV=1	2	1	1	1	1	393	44.8	9.07		1.83		1	0	#DIV/0!	#DIV/0!													Medium	Medium	Medium	Medium	Medium	Medium	Medium	Medium	Medium	Medium	Medium	Oxidation [P352]	1	Oxidation [P352]	#DIV/0!	#DIV/0!
Q91XV3	Brain acid soluble protein 1 OS=Mus musculus OX=10090 GN=Basp1 PE=1 SV=3	79	11	28	11	1	226	22.1	4.51	418	78.96	11	11	0	1223.38	1285.42	7.11	4.91	1292.2	1196.1	1337.8	1203.4	1087.4	1364	1301.3	1190.2	1270.6	1301	High	High	High	High	High	High	High	High	High	High	High		0		1.05071	0.350132
Q80Y61	Brain-specific angiogenesis inhibitor 1-associated protein 2-like protein 2 OS=Mus musculus OX=10090 GN=Baiap2l2 PE=1 SV=1	1	1	3	1	1	522	58.4	9.5	0	2.07	1	1	0	526.86	997.06	25.12	92.75	487.5	772.5	531	397.9	445.4	705.8	458.3	412.2	781.7	2627.3	High	High	High	High	High	High	High	High	High	High	High		0		1.89246	0.350409
O35855	Branched-chain-amino-acid aminotransferase, mitochondrial OS=Mus musculus OX=10090 GN=Bcat2 PE=1 SV=2	37	15	288	15	1	393	44.1	8.29	2510	609.03	15	15	0	28193.9	26457	4.53	11.25	28814.5	27402.1	26306	29522.7	28924.2	24299.6	24830.9	26678.7	31534.9	24941	High	High	High	High	High	High	High	High	High	High	High	Oxidation [P138; P347; P367]	0		0.938395	0.241445
O70445	BRCA1-associated RING domain protein 1 OS=Mus musculus OX=10090 GN=Bard1 PE=2 SV=1	4	1	2	1	1	765	84.2	8.37	0	0	1	1	0	#DIV/0!	#DIV/0!													High	High	High	High	High	High	High	High	High	High	High		0		#DIV/0!	#DIV/0!
Q8CHH5	BRD4-interacting chromatin-remodeling complex-associated protein-like OS=Mus musculus OX=10090 GN=Bicral PE=1 SV=2	1	1	6	1	1	1074	114.3	6.62	0	7.22	1	1	0	1154.08	1079.9	4.11	3.58	1226.3	1099.8	1124.4	1128.6	1191.3	1122.6	1089.5	1103.4	1059.9	1024.1	High	High	High	High	High	High	High	High	High	High	High		0		0.935724	0.0609712
Q9QZK2	Breast cancer anti-estrogen resistance protein 3 OS=Mus musculus OX=10090 GN=Bcar3 PE=1 SV=1	1	1	7	1	1	820	92.2	7.81	0	11.01	1	1	0	1477.72	1329.7	15.42	8.28	1568.4	1457.6	1277.6	1698.2	1386.8	1259.8	1458.2	1387	1179.4	1364.1	High	High	High	High	High	High	High	High	High	High	High		0		0.899832	0.269637
P97929	Breast cancer type 2 susceptibility protein homolog OS=Mus musculus OX=10090 GN=Brca2 PE=1 SV=2	0	1	9	1	1	3329	370.4	6.67	0	9.66	1	1	0	2313.64	1869.54	11.83	7.98	2512.3	1824.5	2399.5	2600.8	2231.1	1636.5	2022.5	1958.9	1824	1905.8	High	High	High	High	High	High	High	High	High	High	High		0		0.808051	0.0798148
Q8CCN5	Breast carcinoma-amplified sequence 3 homolog OS=Mus musculus OX=10090 GN=Bcas3 PE=1 SV=2	1	1	3	1	1	928	101	6.7	15	3.38	1	1	0	165.74	176.34	5.71	3.31	158.7	166.4	182.9	159.5	161.2	176	169.2	172.4	183.4	180.7	High	High	High	High	High	High	High	High	High	High	High		0		1.06396	0.170505
Q8BXV2	BRI3-binding protein OS=Mus musculus OX=10090 GN=Bri3bp PE=1 SV=1	19	4	26	4	1	253	28.2	9.52	320	58.18	4	4	0	2154.38	2189.38	7.13	4.45	1863.3	2208.4	2234.2	2296.6	2169.4	2089	2083.6	2217.9	2272.5	2283.9	High	High	High	High	High	High	High	High	High	High	High		0		1.01625	0.59667
Q3UI43	BRISC and BRCA1-A complex member 1 OS=Mus musculus OX=10090 GN=Babam1 PE=1 SV=1	20	3	10	3	1	333	36.8	4.55	93	20.22	3	3	0	100.98	100.12	18.87	12.19	77	114.9	99.4	128.9	84.7	100.8	85.4	90.9	115.3	108.2	High	High	High	High	High	High	High	High	High	High	High		0		0.991483	0.93917
Q8K3W0	BRISC and BRCA1-A complex member 2 OS=Mus musculus OX=10090 GN=Babam2 PE=1 SV=2	3	1	2	1	1	383	43.5	5.94	24	3.31	1	1	0	137.94	125.2	24.94	11.08	106.2	177	116.5	170.4	119.6	122	111.7	115.9	146.9	129.5	High	High	High	High	High	High	High	High	High	High	High		0		0.907641	0.436529
Q3TCJ1	BRISC complex subunit Abraxas 2 OS=Mus musculus OX=10090 GN=Abraxas2 PE=1 SV=1	6	2	6	2	1	415	46.9	6.18	33	9.23	2	2	0	521.7	522.92	8.22	6.66	517.4	560.7	543.1	546.6	440.7	548	476.5	519.8	564.7	505.6	High	High	High	High	High	High	High	High	High	High	High		0		1.00234	0.964266
Q8K2Q7	BRO1 domain-containing protein BROX OS=Mus musculus OX=10090 GN=Brox PE=1 SV=1	22	9	31	9	1	411	46.2	7.69	170	50.91	9	9	0	2661.44	2814.44	7.52	6.92	2489.9	3001.8	2721	2656.6	2437.9	2921.4	2738	2572	2757.1	3083.7	High	High	High	High	High	High	High	High	High	High	High		0		1.05749	0.422689
E9PZ26	Bromodomain-containing 1 OS=Mus musculus OX=10090 GN=Brd1 PE=1 SV=1	1	1	5	1	1	1189	133.3	8.59		11.68		1	0	635.82	635.48	5.85	5.95	663.6	598.9	657.9	607.3	651.4	595.1	626.5	654	690.8	611	High	High	High	High	High	High	High	High	High	High	High		0		0.999465	0.990387
Q80Y55	BSD domain-containing protein 1 OS=Mus musculus OX=10090 GN=Bsdc1 PE=1 SV=1	33	8	16	8	1	427	46.9	4.4	177	36.07	5	8	0	641.1	653.04	4.27	4.63	635.3	651.9	666.3	612.2	639.8	628	653.4	630.9	703.3	649.6	High	High	High	High	High	High	High	High	High	High	High		0		1.01862	0.603412
Q9DB72	BTB/POZ domain-containing protein 17 OS=Mus musculus OX=10090 GN=Btbd17 PE=1 SV=1	3	1	5	2	1	478	52.6	9.42	0	5.23	1	1	0	1003.98	964.96	15.82	15.15	1282.5	927	926.5	956.9	927	909.7	999.2	1202.8	880.4	832.7	High	High	High	High	High	High	High	High	High	High	High		0		0.961135	0.733092
Q6WVG3	BTB/POZ domain-containing protein KCTD12 OS=Mus musculus OX=10090 GN=Kctd12 PE=1 SV=1	44	11	35	8	1	327	35.9	5.81	273	67.3	10	11	2	1930.82	1996.16	4.57	2.26	1838.6	2052.2	2003.7	1920.9	1838.7	2033.2	2023.3	1924.2	1979.5	2020.6	High	High	High	High	High	High	High	High	High	High	High		0		1.03384	0.29951
Q9JMD0	BUB3-interacting and GLEBS motif-containing protein ZNF207 OS=Mus musculus OX=10090 GN=Znf207 PE=1 SV=1	3	1	2	1	1	495	52.8	9.1	47	4.62	1	1	0	#DIV/0!	#DIV/0!													High	High	High	High	High	High	High	High	High	High	High		0		#DIV/0!	#DIV/0!
A4QPC6	Butyrophilin subfamily 2 member A2 OS=Mus musculus OX=10090 GN=Btn2a2 PE=1 SV=1	1	1	2	1	1	514	58.4	5.9		4.84		1	0	#DIV/0!	#DIV/0!													High	High	High	High	High	High	High	High	High	High	High		0		#DIV/0!	#DIV/0!
Q8BJE2	Butyrophilin-like protein 9 OS=Mus musculus OX=10090 GN=Btnl9 PE=1 SV=1	8	4	8	4	1	536	60.5	6.42	48	13.43	4	4	0	773.84	777.16	4.68	5.81	786.5	759.4	825.3	721.7	776.3	827.8	722.3	746.1	772.5	817.1	High	High	High	High	High	High	High	High	High	High	High		0		1.00429	0.904642
Q9WV35	C->U-editing enzyme APOBEC-2 OS=Mus musculus OX=10090 GN=Apobec2 PE=1 SV=1	54	9	39	9	1	224	25.6	4.79	481	104.29	8	9	0	1513.48	2010.4	12.75	15.5	1574.3	1538.4	1589.5	1183.1	1682.1	1967.4	2324.9	1822.7	1615.9	2321.1	High	High	High	High	High	High	High	High	High	High	High		0		1.32833	0.00689193
Q497Y9	C130050O18Rik protein OS=Mus musculus OX=10090 GN=C130050O18Rik PE=2 SV=1	2	1	1	1	1	356	38.7	8.34		2.43		1	0	218.32	247.7	3.28	5.69	214.5	228	222.7	215.6	210.8	257.4	259.8	244.6	224.8	251.9	High	High	High	High	High	High	High	High	High	High	High		0		1.13457	0.00946813
Q922D8	C-1-tetrahydrofolate synthase, cytoplasmic OS=Mus musculus OX=10090 GN=Mthfd1 PE=1 SV=4	43	36	144	36	1	935	101.1	7.14	1159	285.43	33	35	0	13799.7	13931.9	2.79	1.05	13879.9	13630.7	14358.3	13634.2	13495.3	13932.1	13993.2	14055	13680.9	13998.3	High	High	High	High	High	High	High	High	High	High	High		0		1.00958	0.399463
Q7TPS5	C2 domain-containing protein 5 OS=Mus musculus OX=10090 GN=C2cd5 PE=1 SV=2	2	1	2	1	1	1016	111.6	5.78	19	3.12	1	1	0	13.7	13.82	12.39	15.33	15	12.2	14.7	15	11.6	13.9	13.1	10.7	15.3	16.1	High	High	High	High	High	High	High	High	High	High	High		0		1.00876	0.935055
Q80W54	CAAX prenyl protease 1 homolog OS=Mus musculus OX=10090 GN=Zmpste24 PE=1 SV=2	20	8	40	8	1	475	54.7	6.95	362	80.38	8	8	0	2327.34	2303.44	1.5	3.34	2323.5	2354.3	2361.1	2296.9	2300.9	2358.1	2264.4	2283	2402.6	2209.1	High	High	High	High	High	High	High	High	High	High	High		0		0.989731	0.583045
B2RQC6	CAD protein OS=Mus musculus OX=10090 GN=Cad PE=1 SV=1	8	15	31	15	1	2225	243.1	6.43	240	55.91	12	14	0	5145.94	5015.6	23.94	27.15	7216	3452.1	5234.4	5220.2	4607	4100.2	3900.4	4319.7	5626.2	7131.5	High	High	High	High	High	High	High	High	High	High	High		0		0.974671	0.895016
Q9R0M0	Cadherin EGF LAG seven-pass G-type receptor 2 OS=Mus musculus OX=10090 GN=Celsr2 PE=1 SV=2	0	1	3	1	1	2920	317.4	5.68		7.52		1	0	956.4	928.2	39.86	15.92	957.4	1588.3	1048	729.1	459.2	1111.4	873.8	724	1021.6	910.2	High	High	High	High	High	High	High	High	High	High	High		0		0.970514	0.901962
P70408	Cadherin-10 OS=Mus musculus OX=10090 GN=Cdh10 PE=1 SV=3	1	1	4	1	1	788	88.3	4.94	47		1		0	1612.96	1544	4.7	7.65	1714	1511.6	1651.9	1539.5	1647.8	1456.2	1478.9	1507.6	1749.5	1527.8	High	High	High	High	High	High	High	High	High	High	High		0		0.957246	0.428999
Q9WTR5	Cadherin-13 OS=Mus musculus OX=10090 GN=Cdh13 PE=1 SV=2	34	20	288	20	1	714	78.1	5.12	2808	626.23	20	20	0	25066.6	27623.1	4.98	5.02	26592.2	24815.7	26290.5	24087.4	23547.4	28282.4	26929.7	28079.2	25610.2	29214	High	High	High	High	High	High	High	High	High	High	High		0		1.10199	0.0309952
P15116	Cadherin-2 OS=Mus musculus OX=10090 GN=Cdh2 PE=1 SV=2	31	17	83	17	1	906	99.7	4.78	1076	210.78	15	17	0	5118.2	5253.16	2.18	2.43	4979.8	5141	5216.1	5161.3	5092.8	5381.8	5331.2	5176.9	5307.3	5068.6	High	High	High	High	High	High	High	High	High	High	High	Oxidation [P793]	1	Oxidation [P793]	1.02637	0.169638
P55284	Cadherin-5 OS=Mus musculus OX=10090 GN=Cdh5 PE=1 SV=2	13	10	24	10	1	784	87.8	5.3	137	45.18	10	10	0	1275.44	1420.3	9.99	6.06	1187.7	1134	1264.4	1453.5	1337.6	1388.9	1351.9	1526.6	1496.7	1337.4	High	High	High	High	High	High	High	High	High	High	High		0		1.11358	0.0489719
F8WHU6	Cadherin-9 OS=Mus musculus OX=10090 GN=Cdh9 PE=1 SV=1	3	1	1	1	1	788	88.5	4.96		0		1	0	19.24	16.64	7.83	8.07	20.1	18.3	17.2	19.7	20.9	18.2	16	16.3	14.9	17.8	Medium	Medium	Medium	Medium	Medium	Medium	Medium	Medium	Medium	Medium	Medium	Oxidation [P409]	1	Oxidation [P409]	0.864865	0.0164805
P61022	Calcineurin B homologous protein 1 OS=Mus musculus OX=10090 GN=Chp1 PE=1 SV=2	59	10	30	10	1	195	22.4	5.1	191	58.23	8	10	0	1265.78	1298.78	5.28	2.91	1189.7	1286.1	1374.4	1251	1227.7	1315.4	1306.2	1237.3	1296.1	1338.9	High	High	High	High	High	High	High	High	High	High	High		0		1.02607	0.520301
Q9JKL5	Calcineurin B homologous protein 3 OS=Mus musculus OX=10090 GN=Tesc PE=1 SV=2	33	6	13	6	1	214	24.6	4.98	115	23.65	4	6	0	641.56	614.66	3.1	4.13	616.6	670.6	645.9	629.8	644.9	614	621.4	571.7	631.8	634.4	High	High	High	High	High	High	High	High	High	High	High		0		0.958071	0.144951
Q63810	Calcineurin subunit B type 1 OS=Mus musculus OX=10090 GN=Ppp3r1 PE=1 SV=3	68	8	33	8	1	170	19.3	4.81	438	85.02	8	8	0	1943.44	1934.46	2.86	5.37	1877.6	1961.5	2003.7	1930.3	1944.1	1976	2061.1	1820.1	1833.7	1981.4	High	High	High	High	High	High	High	High	High	High	High		0		0.995379	0.881223
Q9R1W5	Calcitonin gene-related peptide type 1 receptor OS=Mus musculus OX=10090 GN=Calcrl PE=1 SV=2	5	2	5	2	1	463	53.2	6.71	36	11.03	2	2	0	43.68	49.1	12.95	15.02	39.2	44	36.3	52.4	46.5	55.8	40.8	42.6	49.3	57	High	High	High	High	High	High	High	High	High	High	High		0		1.12408	0.233265
Q8BG21	Calcium channel flower homolog OS=Mus musculus OX=10090 GN=Cacfd1 PE=1 SV=1	9	2	10	2	1	171	18.3	5.44	94	14.81	2	2	0	434.1	471	5.55	8.16	410.7	454.9	458	431.5	415.4	511.6	456.9	442.9	431.3	512.3	High	High	High	High	High	High	High	High	High	High	High		0		1.085	0.221277
Q8CGZ0	Calcium homeostasis endoplasmic reticulum protein OS=Mus musculus OX=10090 GN=Cherp PE=1 SV=1	1	1	2	1	1	936	106.1	9.14	0	3.19	1	1	0	#DIV/0!	#DIV/0!													High	High	High	High	High	High	High	High	High	High	High		0		#DIV/0!	#DIV/0!
Q921L3	Calcium load-activated calcium channel OS=Mus musculus OX=10090 GN=Tmco1 PE=1 SV=1	16	3	6	3	1	188	21.2	9.74	53	10.69	3	3	0	781.96	822.26	5.01	7.11	712.9	828.4	795.2	795.8	777.5	890.3	875.6	776.6	759.3	809.5	High	High	High	High	High	High	High	High	High	High	High		0		1.05154	0.344206
Q8BWG9	Calcium release-activated calcium channel protein 1 OS=Mus musculus OX=10090 GN=Orai1 PE=2 SV=1	3	1	2	1	1	304	33	7.06	0	2.67	1	1	0	#DIV/0!	#DIV/0!													High	High	High	High	High	High	High	High	High	High	High		0		#DIV/0!	#DIV/0!
P49070	Calcium signal-modulating cyclophilin ligand OS=Mus musculus OX=10090 GN=Camlg PE=1 SV=2	3	1	2	1	1	294	32.5	7.74	47	3.3	1	1	0	132.34	128.84	6.72	8.39	121.6	128.1	147.6	130.7	133.7	133.6	123.5	113.2	132.6	141.3	High	High	High	High	High	High	High	High	High	High	High		0		0.973553	0.691882
Q3UMR5	Calcium uniporter protein, mitochondrial OS=Mus musculus OX=10090 GN=Mcu PE=1 SV=2	29	8	24	8	1	350	39.7	8.56	212	51.07	5	8	0	1108.88	1078.56	3.35	5.53	1087.2	1098	1146	1058.5	1154.7	1051.8	1071.1	1095.4	1167.9	1006.6	High	High	High	High	High	High	High	High	High	High	High		0		0.972657	0.501972
Q9CTY5	Calcium uptake protein 3, mitochondrial OS=Mus musculus OX=10090 GN=Micu3 PE=2 SV=2	2	1	1	1	1	523	59.8	7.15		2.19		1	0	#DIV/0!	#DIV/0!													High	High	High	High	High	High	High	High	High	High	High		0		#DIV/0!	#DIV/0!
Q64338	Calcium/calmodulin-dependent 3',5'-cyclic nucleotide phosphodiesterase 1C OS=Mus musculus OX=10090 GN=Pde1c PE=1 SV=2	7	4	21	3	1	706	80.2	9.06	105	45.24	3	4	0	172.52	189.54	9.89	11.83	150.9	196.1	184.3	175.5	155.8	207	183.2	153	204.1	200.4	High	High	High	High	High	High	High	High	High	High	High		0		1.09866	0.36859
Q91YS8	Calcium/calmodulin-dependent protein kinase type 1 OS=Mus musculus OX=10090 GN=Camk1 PE=1 SV=1	28	8	28	8	1	374	41.6	5.35	368	70.12	8	8	0	1810.68	1740.62	9.81	4.44	1511.4	1972.9	1832.7	2000.3	1736.1	1700.7	1659.5	1696.7	1815.2	1831	High	High	High	High	High	High	High	High	High	High	High		0		0.961307	0.491154
Q9QYK9	Calcium/calmodulin-dependent protein kinase type 1B OS=Mus musculus OX=10090 GN=Pnck PE=1 SV=1	4	1	1	1	1	343	38.5	6.47		0		1	0	#DIV/0!	#DIV/0!													High	High	High	High	High	High	High	High	High	High	High		0		#DIV/0!	#DIV/0!
F8WIS9	Calcium/calmodulin-dependent protein kinase type II subunit alpha OS=Mus musculus OX=10090 GN=Camk2a PE=1 SV=1	28	10	23	1	1	489	55.3	7.44		114.12		10	0	161.94	146	8.71	5.58	138.5	169.2	166.8	158.4	176.8	152.3	149.9	142.7	151.9	133.2	High	High	High	High	High	High	High	High	High	High	High		0		0.901568	0.16973
P11798	Calcium/calmodulin-dependent protein kinase type II subunit alpha OS=Mus musculus OX=10090 GN=Camk2a PE=1 SV=2	27	10	42	1	1	478	54.1	7.08	546	103.3	8	10	6	1919.62	1879.52	7.48	3.23	1667.9	2003.3	2043.9	1925	1958	1794.5	1856.5	1872.4	1949.1	1925.1	High	High	High	High	High	High	High	High	High	High	High		0		0.97911	0.506716
Q6PHZ2	Calcium/calmodulin-dependent protein kinase type II subunit delta OS=Mus musculus OX=10090 GN=Camk2d PE=1 SV=1	42	17	79	2	1	499	56.3	7.25	937	173.34	16	17	16	8060.64	8653.94	10.02	5.79	6950.4	9205.9	7481.3	8517.4	8148.2	8849.4	9240	8020.4	8254.9	8905	High	High	High	High	High	High	High	High	High	High	High		0		1.0736	0.186718
A0A286YDL6	Calcium/calmodulin-dependent protein kinase type II subunit gamma (Fragment) OS=Mus musculus OX=10090 GN=Camk2g PE=1 SV=1	46	8	12	1	1	241	26.1	8.73		45.41		8	0	#DIV/0!	#DIV/0!													High	High	High	High	High	High	High	High	High	High	High		0		#DIV/0!	#DIV/0!
Q923T9	Calcium/calmodulin-dependent protein kinase type II subunit gamma OS=Mus musculus OX=10090 GN=Camk2g PE=1 SV=1	23	11	29	1	1	529	59.6	7.58	197	55.64	10	11	4	1139.44	1168.18	10.72	6.24	1032.6	1376.9	1087.2	1119.7	1080.8	1160.2	1188.4	1058.7	1171.8	1261.8	High	High	High	High	High	High	High	High	High	High	High		0		1.02522	0.680308
Q8CGU1	Calcium-binding and coiled-coil domain-containing protein 1 OS=Mus musculus OX=10090 GN=Calcoco1 PE=1 SV=2	7	4	8	4	1	691	77.2	4.82	44	13.64	4	4	0	457.62	481.86	6.54	3.48	441	434.2	512.5	438.2	462.2	484.4	497.3	463.1	466	498.5	High	High	High	High	High	High	High	High	High	High	High		0		1.05297	0.277717
Q8C633	Calcium-binding and spermatid-specific protein 1 OS=Mus musculus OX=10090 GN=Cabs1 PE=1 SV=1	2	1	2	1	1	391	42.3	4.18	0	2.48	1	1	0	#DIV/0!	#DIV/0!													High	High	High	High	High	High	High	High	High	High	High		0		#DIV/0!	#DIV/0!
Q8BH59	Calcium-binding mitochondrial carrier protein Aralar1 OS=Mus musculus OX=10090 GN=Slc25a12 PE=1 SV=1	68	39	726	33	1	677	74.5	8.25	8865	1610.51	38	39	8	69763.1	70054.7	3.01	2.75	66648.2	69758.3	68488.7	72076.5	71843.7	68132.3	71676.5	71502.4	71182.9	67779.4	High	High	High	High	High	High	High	High	High	High	High	Oxidation [P531; P629; P630]	3	Oxidation [P531; P629; P630]	1.00418	0.828602
Q9QXX4	Calcium-binding mitochondrial carrier protein Aralar2 OS=Mus musculus OX=10090 GN=Slc25a13 PE=1 SV=1	59	38	559	32	1	676	74.4	8.6	5584	1205.92	34	37	0	44196.8	46559.4	3.49	4.9	41601.6	44851.6	43370.5	45247.2	45912.9	44875.8	46014.3	50258.3	44623	47025.6	High	High	High	High	High	High	High	High	High	High	High	Oxidation [P521; P534]	2	Oxidation [P521; P534]	1.05346	0.140754
Q8BMD8	Calcium-binding mitochondrial carrier protein SCaMC-1 OS=Mus musculus OX=10090 GN=Slc25a24 PE=1 SV=1	11	6	10	6	1	475	52.9	7.43	35	16.33	4	6	0	623.26	698.4	18.89	14.13	820.1	523.4	688.9	545.7	538.2	711	638.8	862.9	664.8	614.5	High	High	High	High	High	High	High	High	High	High	High		0		1.12056	0.197107
A2ASZ8	Calcium-binding mitochondrial carrier protein SCaMC-2 OS=Mus musculus OX=10090 GN=Slc25a25 PE=1 SV=1	2	1	4	1	1	469	52.6	8.54	0	5.93	1	1	0	264.96	294.98	13.57	7.2	306	258.1	302.6	216.4	241.7	291.4	263.2	297.6	322.2	300.5	High	High	High	High	High	High	High	High	High	High	High		0		1.1133	0.258561
Q06138	Calcium-binding protein 39 OS=Mus musculus OX=10090 GN=Cab39 PE=1 SV=2	43	17	54	14	1	341	39.8	6.89	359	115.85	15	17	3	7545.7	7573.7	7.59	5.97	6688.4	8146.7	7836.8	7968.5	7088.1	7793	6767	7727	7817.4	7764.1	High	High	High	High	High	High	High	High	High	High	High		0		1.00371	0.950627
Q9DB16	Calcium-binding protein 39-like OS=Mus musculus OX=10090 GN=Cab39l PE=1 SV=3	9	4	14	1	1	337	39.1	8.31	87	17.04	4	4	0	#DIV/0!	#DIV/0!													High	High	High	High	High	High	High	High	High	High	High		0		#DIV/0!	#DIV/0!
E9Q835	Calcium-dependent secretion activator 2 OS=Mus musculus OX=10090 GN=Cadps2 PE=1 SV=1	1	2	9	1	1	1304	148.5	6.05		20.24		2	0	132.76	140.34	10.43	4.04	124.7	122.6	154.1	138.7	123.7	135.6	144.3	142.3	146.3	133.2	High	High	High	High	High	High	High	High	High	High	High		0		1.0571	0.235215
Q8K1N1	Calcium-independent phospholipase A2-gamma OS=Mus musculus OX=10090 GN=Pnpla8 PE=1 SV=1	18	13	29	13	1	776	87.3	9.23	192	64.13	11	13	0	2364.98	2381.92	1.64	1.62	2361.4	2359.5	2344.6	2346	2413.4	2376.8	2425.2	2359.8	2332.6	2415.2	High	High	High	High	High	High	High	High	High	High	High		0		1.00716	0.271458
Q9CR86	Calcium-regulated heat stable protein 1 OS=Mus musculus OX=10090 GN=Carhsp1 PE=1 SV=1	24	3	10	3	1	148	16.1	8.21	97	24.62	3	3	0	842.74	924.52	11.97	13.6	1003	785	915.1	781.8	728.8	1142.8	915.1	839.8	844.2	880.7	High	High	High	High	High	High	High	High	High	High	High		0		1.09704	0.124874
Q80XR2	Calcium-transporting ATPase type 2C member 1 OS=Mus musculus OX=10090 GN=Atp2c1 PE=1 SV=2	2	2	9	1	1	918	100.2	6.83	21	16.57	1	2	0	#DIV/0!	#DIV/0!													High	High	High	High	High	High	High	High	High	High	High		0		#DIV/0!	#DIV/0!
Q9CXW3	Calcyclin-binding protein OS=Mus musculus OX=10090 GN=Cacybp PE=1 SV=1	35	8	18	7	1	229	26.5	7.87	98	31.14	8	7	0	1703.72	1706.88	13.54	6.16	1335.2	1916.6	1663.8	1976.6	1626.4	1680.1	1618.7	1606.1	1780.9	1848.6	High	High	High	High	High	High	High	High	High	High	High		0		1.00185	0.980608
F6T2Z7	Caldesmon 1 (Fragment) OS=Mus musculus OX=10090 GN=Cald1 PE=1 SV=8	10	4	4	2	1	354	41.3	5.2		13.76		4	0	77.86	102.84	11.42	18.27	84.1	85	80.9	70.1	69.2	119.4	109.2	87.6	78.6	119.4	High	High	High	High	High	High	High	High	High	High	High		0		1.32083	0.0383384
E9QA15	Caldesmon 1 OS=Mus musculus OX=10090 GN=Cald1 PE=1 SV=1	18	14	20	11	1	768	89.2	5.5		73.11		14	2	3078.4	3717.7	8.63	15.71	3417.1	3142.3	2945.5	3024	2863.1	4406.4	4083.5	3368.2	2926.2	3804.2	High	High	High	High	High	High	High	High	High	High	High		0		1.20767	0.03908
Q99JT6	Calfacilitin OS=Mus musculus OX=10090 GN=Tlcd1 PE=2 SV=1	5	1	2	1	1	247	28.8	9.64	35	4.46	1	1	0	146.68	150.16	7.37	2.32	144	145.3	167.3	137.4	139.4	149.6	148.4	147.1	156.1	149.6	High	High	High	High	High	High	High	High	High	High	High		0		1.02373	0.620201
P0DP27	Calmodulin-2 OS=Mus musculus OX=10090 GN=Calm2 PE=1 SV=1	52	10	244	10	1	149	16.8	4.22	1285	473.06	10	10	0	33924.2	33569.6	11.68	9.38	37122.4	27694.3	35701.4	32924.1	36179	36898.9	36059.2	34139.4	29473.7	31277	High	High	High	High	High	High	High	High	High	High	High		0		0.989547	0.885984
P35564	Calnexin OS=Mus musculus OX=10090 GN=Canx PE=1 SV=1	41	31	326	31	1	591	67.2	4.64	2110	679.03	29	31	0	43732.4	43284.2	3.7	3.48	42219.6	43463.9	44569.3	46378.3	42030.9	44680.1	45131.7	42256	42497	41856.3	High	High	High	High	High	High	High	High	High	High	High		0		0.989752	0.725378
A0A0R4J0K6	Calpain 8, isoform CRA_a OS=Mus musculus OX=10090 GN=Capn8 PE=1 SV=1	1	1	1	1	1	703	79.2	5.55		1.95		1	0	#DIV/0!	#DIV/0!													High	High	High	High	High	High	High	High	High	High	High		0		#DIV/0!	#DIV/0!
A0A0R4IZW8	Calpain small subunit 1 OS=Mus musculus OX=10090 GN=Capns1 PE=1 SV=1	54	8	22	8	1	268	28.4	5.63		105.74		8	0	2434.06	2059.72	13.77	3.18	2254	2406.3	2172.7	2947.1	2390.2	2100.8	2074.1	2132.2	2026.4	1965.1	High	High	High	High	High	High	High	High	High	High	High		0		0.846208	0.0697103
O35350	Calpain-1 catalytic subunit OS=Mus musculus OX=10090 GN=Capn1 PE=1 SV=1	33	23	79	23	1	713	82.1	5.87	586	156.76	23	23	0	4317.84	4424.02	6.75	4.11	3942.2	4736.2	4370.8	4489.4	4050.6	4411.5	4240.2	4320.5	4719.5	4428.4	High	High	High	High	High	High	High	High	High	High	High		0		1.02459	0.575455
O08529	Calpain-2 catalytic subunit OS=Mus musculus OX=10090 GN=Capn2 PE=1 SV=4	37	23	96	23	1	700	79.8	4.96	1134	217.31	21	23	0	9777.84	9520.76	18.47	9.68	7271.2	11470.2	9205	12099.1	8843.7	9038.6	8469	9350	10908.5	9837.7	High	High	High	High	High	High	High	High	High	High	High		0		0.973708	0.775714
Q9R1S8	Calpain-7 OS=Mus musculus OX=10090 GN=Capn7 PE=2 SV=1	3	3	6	3	1	813	92.5	7.97	25	8.59	3	3	0	294.04	287.8	8.07	5.1	303	317.6	316.4	272.2	261	299.3	282	277.4	307.1	273.2	High	High	High	High	High	High	High	High	High	High	High		0		0.978778	0.680893
P51125	Calpastatin OS=Mus musculus OX=10090 GN=Cast PE=1 SV=2	53	33	148	2	1	788	84.9	5.52	1318	369.38	28	33	28	12279.1	12563.5	3.6	2.32	11969.2	11619.6	12410.1	12528.4	12868	12854.2	12790	12308.5	12203.3	12661.6	High	High	High	High	High	High	High	High	High	High	High		0		1.02317	0.40908
Q08091	Calponin-1 OS=Mus musculus OX=10090 GN=Cnn1 PE=1 SV=1	23	7	18	6	1	297	33.3	8.97	98	26.23	6	7	1	1574.24	1880.78	11.82	31.49	1802	1716	1579.4	1479	1294.8	1982	1388.7	1329.5	1902.8	2800.9	High	High	High	High	High	High	High	High	High	High	High	Oxidation [P10]	1	Oxidation [P10]	1.19472	0.405721
Q08093	Calponin-2 OS=Mus musculus OX=10090 GN=Cnn2 PE=1 SV=1	16	3	8	1	1	305	33.1	7.62	39	14.76	2	3	0	60.64	77.58	22.71	37.44	48.1	67.1	83.6	48.3	56.1	125.9	47.2	73.5	69.3	72	High	High	High	High	High	High	High	High	High	High	High		0		1.27935	0.376525
Q9DAW9	Calponin-3 OS=Mus musculus OX=10090 GN=Cnn3 PE=1 SV=1	23	6	15	4	1	330	36.4	5.72	115	26.92	5	6	0	490.22	507.18	12.57	14.05	449.2	573.8	477.6	538.2	412.3	551.6	488	421.2	471.5	603.6	High	High	High	High	High	High	High	High	High	High	High		0		1.0346	0.77344
P14211	Calreticulin OS=Mus musculus OX=10090 GN=Calr PE=1 SV=1	57	23	283	23	1	416	48	4.49	2456	727.62	22	23	0	34244.4	35920.4	4.82	9.97	36074.8	33707.8	35984.2	33281.5	32173.9	40310.2	39070.7	34081.6	31952.8	34186.6	High	High	High	High	High	High	High	High	High	High	High	Oxidation [P204; P205; P250; P263; P264; P269]	6	Oxidation [P204; P205; P250; P263; P264; P269]	1.04894	0.3123
O09161	Calsequestrin-2 OS=Mus musculus OX=10090 GN=Casq2 PE=1 SV=3	45	17	302	17	1	415	48.1	4.27	2334	551.24	17	16	0	35453.4	35891.1	12.53	3.86	29101.5	40443.1	32826.1	39974.2	34922.3	35434.6	36059.7	38108.6	34349.1	35503.4	High	High	High	High	High	High	High	High	High	High	High		0		1.01234	0.865915
Q6XLQ8	Calumenin OS=Mus musculus OX=10090 GN=Calu PE=1 SV=1	57	18	81	3	1	315	37.1	4.59		346.77		18	16	13371.1	13889	5.37	6.53	14534.4	12515.9	13752.7	13256.5	12795.9	14860	14554.9	12720.9	13191.3	14117.7	High	High	High	High	High	High	High	High	High	High	High		0		1.03873	0.388386
O35887	Calumenin OS=Mus musculus OX=10090 GN=Calu PE=1 SV=1	62	18	161	3	1	315	37	4.67	1378	361.47	17	18	0	1853.26	1998.48	5.36	9.07	1993	1773.9	1944.9	1812.6	1741.9	2228.2	2088.5	1795	1834.7	2046	High	High	High	High	High	High	High	High	High	High	High		0		1.07836	0.184348
P05132	cAMP-dependent protein kinase catalytic subunit alpha OS=Mus musculus OX=10090 GN=Prkaca PE=1 SV=3	39	15	95	9	1	351	40.5	8.79	859	205.85	14	15	8	15527.7	15972.9	2.75	4.86	14755.7	15623.8	15605.7	16074.4	15578.8	15553	16186.7	15243	15660.4	17221.6	High	High	High	High	High	High	High	High	High	High	High		0		1.02868	0.311729
P68181	cAMP-dependent protein kinase catalytic subunit beta OS=Mus musculus OX=10090 GN=Prkacb PE=1 SV=2	35	11	56	5	1	351	40.7	8.56	392	122.2	8	11	0	895.88	962.14	2.64	2.47	898.2	904.9	919.6	865.4	891.3	953.1	962.9	928.8	993	972.9	High	High	High	High	High	High	High	High	High	High	High		0		1.07396	0.0264658
P63248	cAMP-dependent protein kinase inhibitor alpha OS=Mus musculus OX=10090 GN=Pkia PE=1 SV=2	70	4	22	4	1	76	8	4.54	234	54.53	4	4	0	2057.08	2189.1	8.61	9.77	2343	1857.7	2006.9	2165.8	1912	1927.4	2062.6	2169.9	2305.3	2480.3	High	High	High	High	High	High	High	High	High	High	High		0		1.06418	0.449255
O70139	cAMP-dependent protein kinase inhibitor gamma OS=Mus musculus OX=10090 GN=Pkig PE=1 SV=1	74	4	14	4	1	76	7.9	4.21	271	35.49	4	4	0	474.7	513.14	8.56	11.91	538	475.2	450.5	443.8	466	519.3	548.4	430.3	479.4	588.3	High	High	High	High	High	High	High	High	High	High	High		0		1.08098	0.232484
Q9DBC7	cAMP-dependent protein kinase type I-alpha regulatory subunit OS=Mus musculus OX=10090 GN=Prkar1a PE=1 SV=3	48	20	123	20	1	381	43.2	5.35	1280	273.63	20	19	0	10003.6	10565.5	5.09	3.17	9152.1	10165.6	10568.5	10212.6	9919	10625.4	10760	10007.8	10557.1	10877.3	High	High	High	High	High	High	High	High	High	High	High		0		1.05618	0.172565
P56212	cAMP-regulated phosphoprotein 19 OS=Mus musculus OX=10090 GN=Arpp19 PE=1 SV=2	40	5	18	4	1	112	12.3	9.09	130	42.24	5	5	0	1008.72	1023.78	7.06	7.09	1008.2	872.5	1063.5	1062	1037.4	1067.4	989.5	955.7	1129.4	976.9	High	High	High	High	High	High	High	High	High	High	High		0		1.01493	0.74014
O89084	cAMP-specific 3',5'-cyclic phosphodiesterase 4A OS=Mus musculus OX=10090 GN=Pde4a PE=1 SV=2	2	1	2	1	1	844	93.5	5.26	13	2.92	1	1	0	22.08	20.78	23.58	12.22	16.9	29.7	25.1	21.1	17.6	18.4	21.6	19.8	24.8	19.3	High	High	High	High	High	High	High	High	High	High	High		0		0.941123	0.599247
B2RX12	Canalicular multispecific organic anion transporter 2 OS=Mus musculus OX=10090 GN=Abcc3 PE=1 SV=1	2	3	6	1	1	1523	169	7.06	24	9.72	1	3	0	#DIV/0!	#DIV/0!													High	High	High	High	High	High	High	High	High	High	High		0		#DIV/0!	#DIV/0!
F8WIA1	CAP-Gly domain-containing linker protein 1 OS=Mus musculus OX=10090 GN=Clip1 PE=1 SV=1	59	88	197	2	1	1437	161.1	5.24		747.47		88	0	453.44	453.28	6.8	6.45	468.8	417.6	472.1	420.4	488.3	423	432.5	469.2	495.3	446.4	High	High	High	High	High	High	High	High	High	High	High		0		0.999647	0.994549
Q922J3	CAP-Gly domain-containing linker protein 1 OS=Mus musculus OX=10090 GN=Clip1 PE=1 SV=1	61	89	369	2	1	1391	155.7	5.24	2787	749.3	80	87	76	32363	33944.8	3.71	2.22	32834.8	31004.2	33874.4	30977.2	33124.4	33991.8	32813.4	34478	34749.6	33691	High	High	High	High	High	High	High	High	High	High	High		0		1.04888	0.055797
Q99LB4	Capping protein (Actin filament), gelsolin-like OS=Mus musculus OX=10090 GN=Capg PE=1 SV=1	39	10	24	10	1	349	38.7	6.95		103.35		10	0	3250.48	3465.26	3.3	6.72	3348.1	3246.4	3262.3	3312.5	3083.1	3463	3196.2	3509.9	3820.3	3336.9	High	High	High	High	High	High	High	High	High	High	High		0		1.06608	0.0794726
Q60865	Caprin-1 OS=Mus musculus OX=10090 GN=Caprin1 PE=1 SV=2	15	12	34	12	1	707	78.1	5.25	188	61.77	11	12	0	3713.34	4073.18	3.66	12.95	3748	3609.3	3706.9	3554.8	3947.7	4647.2	4524.9	3746.7	3385.4	4061.7	High	High	High	High	High	High	High	High	High	High	High		0		1.0969	0.190168
Q9DBC3	Cap-specific mRNA (nucleoside-2'-O-)-methyltransferase 1 OS=Mus musculus OX=10090 GN=Cmtr1 PE=1 SV=1	3	3	5	2	1	837	95.6	7.27	0	8.41	1	2	1	5028.06	4278.08	13.6	8.68	5622.3	5257.3	4710.7	3883.8	5666.2	4380.2	4186.6	3680.5	4610.9	4532.2	High	High	High	High	High	High	High	High	High	High	High		0		0.850841	0.113302
Q3UZA1	CapZ-interacting protein OS=Mus musculus OX=10090 GN=Rcsd1 PE=1 SV=1	42	16	81	16	1	412	44.1	5.16	686	152.58	16	16	0	4505.5	4682.76	5.08	10.25	4317.8	4749.5	4760.9	4189.2	4510.1	5222.1	4982.4	4178.2	4176.5	4854.6	High	High	High	High	High	High	High	High	High	High	High		0		1.03934	0.504826
O88199	Carbohydrate sulfotransferase 3 OS=Mus musculus OX=10090 GN=Chst3 PE=2 SV=1	5	1	1	1	1	472	54	9.1	0		1		0	36.54	40.4	13.16	5.38	32.4	41.5	42.5	32.9	33.4	38.7	40.9	39.9	43.9	38.6	Medium	Medium	Medium	Medium	Medium	Medium	Medium	Medium	Medium	Medium	Medium		0		1.10564	0.190706
P13634	Carbonic anhydrase 1 OS=Mus musculus OX=10090 GN=Ca1 PE=1 SV=4	10	2	5	2	1	261	28.3	6.96	0	5.5	1	2	0	117.3	117.84	16.57	4.4	113.9	136.5	122.2	121.9	92	118.4	122	109.8	122.6	116.4	High	High	High	High	High	High	High	High	High	High	High	Oxidation [P31]	1	Oxidation [P31]	1.0046	0.942175
Q9D6N1	Carbonic anhydrase 13 OS=Mus musculus OX=10090 GN=Ca13 PE=1 SV=1	5	1	2	1	1	262	29.5	6.65	15	3.23	1	1	0	77.6	80.76	7.45	11.35	78.6	86.9	74.1	69.5	78.9	78.5	74.5	74.7	79.4	96.7	High	High	High	High	High	High	High	High	High	High	High	Oxidation [P216]	1	Oxidation [P216]	1.04072	0.568658
Q9WVT6	Carbonic anhydrase 14 OS=Mus musculus OX=10090 GN=Ca14 PE=1 SV=1	15	4	14	4	1	337	37.5	6.35	96	30.8	3	4	0	588.88	595.86	6.27	7.09	535.8	606.8	646.1	578.3	577.4	643.8	601.9	542.3	626.9	564.4	High	High	High	High	High	High	High	High	High	High	High		0		1.01185	0.852393
P00920	Carbonic anhydrase 2 OS=Mus musculus OX=10090 GN=Ca2 PE=1 SV=4	40	7	17	7	1	260	29	7.01	196	46.54	6	7	0	1059.26	1050.42	20.01	7.3	1437.2	1028.7	1048	908.8	873.6	1106.4	1051.5	1144.8	976.6	972.8	High	High	High	High	High	High	High	High	High	High	High		0		0.991655	0.919007
P16015	Carbonic anhydrase 3 OS=Mus musculus OX=10090 GN=Ca3 PE=1 SV=3	61	13	75	13	1	260	29.3	7.37	584	186.93	12	13	0	7621.44	5595.92	81.73	55.01	18746.4	4429	5819.4	4827.6	4284.8	10897.6	3503.9	4693	5429.3	3455.8	High	High	High	High	High	High	High	High	High	High	High		0		0.734234	0.244991
Q64444	Carbonic anhydrase 4 OS=Mus musculus OX=10090 GN=Ca4 PE=1 SV=1	22	7	27	7	1	305	34.3	8.21	212	51.36	7	7	0	2134.12	2265.12	3.93	6.02	2043.4	2154.5	2252.3	2056.1	2164.3	2454.3	2268.4	2245.7	2071.1	2286.1	High	High	High	High	High	High	High	High	High	High	High		0		1.06138	0.153655
P28651	Carbonic anhydrase-related protein OS=Mus musculus OX=10090 GN=Ca8 PE=1 SV=5	20	3	7	3	1	291	33.1	4.78	104	19.11	3	3	0	537.54	523.58	5.57	1.93	551.9	504.9	575.7	509.7	545.5	533.8	509.3	526.1	517.6	531.1	High	High	High	High	High	High	High	High	High	High	High		0		0.97403	0.244985
P48758	Carbonyl reductase [NADPH] 1 OS=Mus musculus OX=10090 GN=Cbr1 PE=1 SV=3	70	16	98	15	1	277	30.6	8.31	1100	250.44	15	16	1	8037.06	8501.02	6.8	5.47	8521.7	7572.1	8656.9	7395.4	8039.2	8309.9	7932.4	9209.4	8564	8489.4	High	High	High	High	High	High	High	High	High	High	High	Oxidation [P259]	1	Oxidation [P259]	1.05773	0.103113
P08074	Carbonyl reductase [NADPH] 2 OS=Mus musculus OX=10090 GN=Cbr2 PE=1 SV=1	42	9	62	8	1	244	25.9	9.01	708	129.21	9	9	1	3559.82	4108.16	5.97	33.66	3845.8	3494.9	3678.6	3564.8	3215	3738.6	3774.9	3152.5	6536.1	3338.7	High	High	High	High	High	High	High	High	High	High	High		0		1.15404	0.426958
Q8K354	Carbonyl reductase [NADPH] 3 OS=Mus musculus OX=10090 GN=Cbr3 PE=1 SV=1	31	6	19	5	1	277	30.9	6.57	255	51.29	6	6	0	420.32	441.66	4.41	10.34	434.4	422.7	433.8	399.7	411	490.1	407.9	414.8	492.8	402.7	High	High	High	High	High	High	High	High	High	High	High		0		1.05077	0.39697
Q91VT4	Carbonyl reductase family member 4 OS=Mus musculus OX=10090 GN=Cbr4 PE=1 SV=2	57	13	64	13	1	236	25.4	9.69	643	135.18	13	13	0	6232.42	6249.68	4.53	12.69	5888	6470	6124.6	6445.5	6234	6488.3	5385.8	6205.6	7446.5	5722.2	High	High	High	High	High	High	High	High	High	High	High		0		1.00277	0.965448
P23953	Carboxylesterase 1C OS=Mus musculus OX=10090 GN=Ces1c PE=1 SV=4	17	8	40	6	1	554	61	5.06	212	72.56	8	8	0	914.98	1019.24	15.12	26.34	1128.4	703.2	967.3	889.8	886.2	828	848.6	830.6	1161.2	1427.8	High	High	High	High	High	High	High	High	High	High	High		0		1.11395	0.522068
Q8VCT4	Carboxylesterase 1D OS=Mus musculus OX=10090 GN=Ces1d PE=1 SV=1	35	16	179	14	1	565	61.7	6.61	1657	375.22	16	16	2	18466.6	19681.3	10.34	9.96	21609.1	19342.4	18253.7	16825.5	16302.4	22013.9	18212	21559.3	17818.4	18802.8	High	High	High	High	High	High	High	High	High	High	High		0		1.06578	0.195304
Q91WU0	Carboxylesterase 1F OS=Mus musculus OX=10090 GN=Ces1f PE=1 SV=1	3	1	1	1	1	561	61.6	6.48	0		1		0	#DIV/0!	#DIV/0!													High	High	High	High	High	High	High	High	High	High	High		0		#DIV/0!	#DIV/0!
E9PV38	Carboxylic ester hydrolase OS=Mus musculus OX=10090 GN=Ces2g PE=1 SV=1	5	2	2	2	1	560	62.7	6.04		8.08		2	0	127.16	136.18	5.02	6.15	126.9	121.8	136.1	118.9	132.1	142.1	141.1	121.7	139.5	136.5	High	High	High	High	High	High	High	High	High	High	High		0		1.07093	0.238178
Q8R1G2	Carboxymethylenebutenolidase homolog OS=Mus musculus OX=10090 GN=Cmbl PE=1 SV=1	54	13	87	13	1	245	27.9	7.18	445	199.87	13	13	0	11438.7	10823.1	3.55	3.54	11254.4	11242.8	11745.9	11796.2	11154.3	10551.9	11046	10289.9	11183.5	11044.3	High	High	High	High	High	High	High	High	High	High	High		0		0.946183	0.0617832
Q7TPZ8	Carboxypeptidase A1 OS=Mus musculus OX=10090 GN=Cpa1 PE=1 SV=1	3	1	5	1	1	419	47.4	5.67	0	5.63	1	1	0	204.52	197.76	10.53	6.09	204.1	166.3	226	208.3	217.9	202.2	194.9	201.1	211.6	179	High	High	High	High	High	High	High	High	High	High	High		0		0.966947	0.59434
Q00493	Carboxypeptidase E OS=Mus musculus OX=10090 GN=Cpe PE=1 SV=2	8	4	8	4	1	476	53.2	5.19	57	14.33	4	4	0	390.92	422.4	8.72	8.28	424.3	380.1	437	363.3	349.9	435.8	415.6	380.8	405.8	474	High	High	High	High	High	High	High	High	High	High	High		0		1.08053	0.338521
Q80V42	Carboxypeptidase M OS=Mus musculus OX=10090 GN=Cpm PE=1 SV=2	5	1	2	1	1	443	50.5	7.78	70	6.3	1	1	0	51.52	59.3	9.69	9.86	45.2	47.9	56.3	54	54.2	66.9	53.7	55.4	64.2	56.3	High	High	High	High	High	High	High	High	High	High	High		0		1.15101	0.11983
Q9WVJ3	Carboxypeptidase Q OS=Mus musculus OX=10090 GN=Cpq PE=1 SV=1	14	6	22	6	1	470	51.8	6.21	156	44.58	6	6	0	1757.06	1853.8	5.96	4.49	1944.4	1648.7	1787.4	1704.4	1700.4	1793.6	1819.4	1829.5	2000.7	1825.8	High	High	High	High	High	High	High	High	High	High	High		0		1.05506	0.262765
P58466	Carboxy-terminal domain RNA polymerase II polypeptide A small phosphatase 1 OS=Mus musculus OX=10090 GN=Ctdsp1 PE=1 SV=1	10	3	8	3	1	261	29.2	6.13	28	11.96	3	3	0	548.96	520.96	7.08	4.55	529.1	577.5	540.5	603.8	493.9	534.8	501.4	520.6	552.8	495.2	High	High	High	High	High	High	High	High	High	High	High		0		0.948994	0.148224
P31809	Carcinoembryonic antigen-related cell adhesion molecule 1 OS=Mus musculus OX=10090 GN=Ceacam1 PE=1 SV=1	3	1	1	1	1	521	57	5.58		0		1	0	#DIV/0!	#DIV/0!													High	High	High	High	High	High	High	High	High	High	High		0		#DIV/0!	#DIV/0!
P61014	Cardiac phospholamban OS=Mus musculus OX=10090 GN=Pln PE=1 SV=1	33	2	325	2	1	52	6.1	8.81	2568	465.93	2	2	0	33310.2	33852.1	4.76	3.3	31875.6	35045.6	32794.3	34388.3	32447.1	32609	33092.4	34805.3	33534.4	35219.5	High	High	High	High	High	High	High	High	High	High	High		0		1.01627	0.569591
Q80ZM8	Cardiolipin synthase (CMP-forming) OS=Mus musculus OX=10090 GN=Crls1 PE=1 SV=1	7	1	2	1	1	303	32.5	9.86	102	8.51	1	1	0	38.62	42.62	13.77	12.79	41.8	36.4	34.4	34.2	46.3	35.8	43	38.7	46.4	49.2	High	High	High	High	High	High	High	High	High	High	High		0		1.10357	0.248032
E9QLJ0	Cardiomyopathy-associated protein 5 OS=Mus musculus OX=10090 GN=Cmya5 PE=1 SV=1	39	98	168	16	1	3676	405.3	4.74		736.23		98	63	19274.5	18714.2	5.09	5.73	17977.9	20850	18782.2	19159	19603.6	20035.2	17833.7	17581.7	19590.5	18529.8	High	High	High	High	High	High	High	High	High	High	High	Oxidation [P1523]	1	Oxidation [P1523]	0.970927	0.546956
Q70KF4	Cardiomyopathy-associated protein 5 OS=Mus musculus OX=10090 GN=Cmya5 PE=1 SV=2	30	84	279	2	1	3739	412.8	4.75	2300	612.07	78	82	0	#DIV/0!	#DIV/0!													High	High	High	High	High	High	High	High	High	High	High	Oxidation [P1254]	0		#DIV/0!	#DIV/0!
Q60753	Cardiotrophin-1 OS=Mus musculus OX=10090 GN=Ctf1 PE=2 SV=1	8	1	1	1	1	203	21.5	7.05		0		1	0	15.64	12.7	7.77	17.28	13.8	17	17	15.4	15	14.9	13.9	10.6	10.1	14	High	High	High	High	High	High	High	High	High	High	High		0		0.81202	0.098784
P47934	Carnitine O-acetyltransferase OS=Mus musculus OX=10090 GN=Crat PE=1 SV=3	41	26	376	26	1	626	70.8	8.44	2638	674.79	26	26	0	44809.8	41822.5	5.05	6.2	40843.9	46238.3	43824.5	45987.1	47155.3	39091.6	41022.5	41683.6	46113.8	41200.9	High	High	High	High	High	High	High	High	High	High	High	Oxidation [P376]	1	Oxidation [P376]	0.933333	0.0578895
P97742	Carnitine O-palmitoyltransferase 1, liver isoform OS=Mus musculus OX=10090 GN=Cpt1a PE=1 SV=4	27	17	125	15	1	773	88.2	8.62	757	213.17	14	17	0	3348.06	3225.94	7.03	6.81	2961.2	3551.9	3488.1	3467.1	3272	3039.7	3434.7	3027.8	3487	3140.5	High	High	High	High	High	High	High	High	High	High	High		0		0.963525	0.261622
Q924X2	Carnitine O-palmitoyltransferase 1, muscle isoform OS=Mus musculus OX=10090 GN=Cpt1b PE=1 SV=1	43	32	590	30	1	772	88.2	8.38	3860	972.94	32	32	4	56339.7	54694.8	3.7	5.34	54391.1	57197.1	55912.8	54920.7	59276.7	50441.6	55351.7	54250.1	58625.2	54805.4	High	High	High	High	High	High	High	High	High	High	High		0		0.970804	0.319526
P52825	Carnitine O-palmitoyltransferase 2, mitochondrial OS=Mus musculus OX=10090 GN=Cpt2 PE=1 SV=2	60	42	595	42	1	658	73.9	8.37	5516	1207.96	40	42	0	73382.3	63948.7	2.55	7.62	71949.1	73534.9	71640.3	75876	73911.4	60000.8	65178.6	62223.3	71876.3	60464.7	High	High	High	High	High	High	High	High	High	High	High	Oxidation [P399]	1	Oxidation [P399]	0.871446	0.00442617
Q80UY1	Carnosine N-methyltransferase OS=Mus musculus OX=10090 GN=Carnmt1 PE=1 SV=1	23	9	27	9	1	400	46.3	6.16	202	48.77	8	9	0	1483.76	1495.8	4.7	7.08	1515.9	1434.7	1533.5	1448.6	1486.1	1491.1	1531.7	1541.2	1318.6	1596.4	High	High	High	High	High	High	High	High	High	High	High		0		1.00811	0.797161
D3Z7H8	Cartilage intermediate layer protein 2 OS=Mus musculus OX=10090 GN=Cilp2 PE=1 SV=1	4	2	3	2	1	1162	125.9	7.77		0		2	0	9.26	11.08	26.45	12.36	13.3	10.8	8.2	7.4	6.6	10.2	13.1	11.9	9.8	10.4	High	High	High	High	High	High	High	High	High	High	High	Oxidation [P528; P773; P775]	3	Oxidation [P528; P773; P775]	1.19654	0.224947
Q9R0G6	Cartilage oligomeric matrix protein OS=Mus musculus OX=10090 GN=Comp PE=1 SV=2	12	6	12	6	1	755	82.3	4.64	144	25.02	6	6	0	405.3	441.42	18.47	10.47	548.8	336.2	382.2	361.9	397.4	392.1	483.2	479.3	461.4	391.1	High	High	High	High	High	High	High	High	High	High	High		0		1.08912	0.542447
Q9CYD3	Cartilage-associated protein OS=Mus musculus OX=10090 GN=Crtap PE=1 SV=3	4	1	2	1	1	400	46.1	5.71	16	3.3	1	1	0	27.68	30.08	15.42	14.5	23	34.5	25.1	25	30.8	26.1	30.1	25.4	33.7	35.1	High	High	High	High	High	High	High	High	High	High	High		0		1.08671	0.331362
Q8BK63	Casein kinase I isoform alpha OS=Mus musculus OX=10090 GN=Csnk1a1 PE=1 SV=2	6	2	3	2	1	337	38.9	9.57	0	5.24	1	2	0	336.38	358.56	6.85	10.89	303.6	353.7	328.4	365.2	331	338.8	356.5	309.6	374	413.9	High	High	High	High	High	High	High	High	High	High	High		0		1.06594	0.272607
Q60737	Casein kinase II subunit alpha OS=Mus musculus OX=10090 GN=Csnk2a1 PE=1 SV=2	27	10	62	9	1	391	45.1	7.74	329	88.64	7	10	0	967.78	998.34	4.8	3.5	906.4	938.2	1045.6	974.1	974.6	1039.4	981.9	1016.5	1006	947.9	High	High	High	High	High	High	High	High	High	High	High		0		1.03158	0.359996
O54833	Casein kinase II subunit alpha' OS=Mus musculus OX=10090 GN=Csnk2a2 PE=1 SV=1	9	3	33	2	1	350	41.2	8.56	57	25.44	3	3	0	53.62	59.58	10.49	11.74	47.6	50.9	55.2	61	53.4	65.9	56.4	58.7	66.9	50	High	High	High	High	High	High	High	High	High	High	High		0		1.11115	0.164573
P67871	Casein kinase II subunit beta OS=Mus musculus OX=10090 GN=Csnk2b PE=1 SV=1	22	4	12	4	1	215	24.9	5.55	192	28.71	4	4	0	268.72	277.04	4.18	1.58	266.8	262.5	286.6	261.3	266.4	279.7	272.2	273.8	276.6	282.9	High	High	High	High	High	High	High	High	High	High	High		0		1.03096	0.198651
Q60649	Caseinolytic peptidase B protein homolog OS=Mus musculus OX=10090 GN=Clpb PE=1 SV=1	31	19	63	19	1	677	76	8.51	452	122.19	17	19	0	4589.52	4632.44	5.39	3.91	4219.7	4826.8	4528.3	4894.2	4478.6	4642.4	4612.6	4507.4	4929.8	4470	High	High	High	High	High	High	High	High	High	High	High		0		1.00935	0.701511
Q8VHK1	Caskin-2 OS=Mus musculus OX=10090 GN=Caskin2 PE=1 SV=3	2	3	6	2	1	1201	126.7	7.39	0	8.18	2	3	0	219.46	227.04	5.39	5.99	238.7	217.4	224.9	206.7	209.6	248.4	219.7	231.2	222.9	213	High	High	High	High	High	High	High	High	High	High	High		0		1.03454	0.0390676
Q9D1I2	Caspase recruitment domain-containing protein 19 OS=Mus musculus OX=10090 GN=Card19 PE=1 SV=1	27	5	16	5	1	183	20.9	8.03	104	26.45	5	5	0	1549.8	1607.14	5.12	5.66	1527.7	1472.5	1656.6	1569.1	1523.1	1494.7	1648.2	1651.4	1711.4	1530	High	High	High	High	High	High	High	High	High	High	High		0		1.037	0.247048
O08738	Caspase-6 OS=Mus musculus OX=10090 GN=Casp6 PE=1 SV=1	6	2	5	2	1	276	31.6	6.89	53	9.77	1	2	0	680.16	716.88	5.46	6.86	724.2	687.7	677.7	612.7	698.5	725.4	734.1	645.2	779.3	700.4	High	High	High	High	High	High	High	High	High	High	High		0		1.05399	0.350926
P97864	Caspase-7 OS=Mus musculus OX=10090 GN=Casp7 PE=1 SV=2	13	2	4	2	1	303	34	6.33	100	12.71	2	2	0	223	247.58	8.2	10.38	217.4	253.2	232.5	211.2	200.7	249.4	284.4	221.8	224.8	257.5	High	High	High	High	High	High	High	High	High	High	High		0		1.11022	0.0929098
O89110	Caspase-8 OS=Mus musculus OX=10090 GN=Casp8 PE=1 SV=1	1	1	4	1	1	480	55.3	5.25	41	2.31	1	1	0	129.8	153.54	8.65	25.01	118.8	146.9	130.8	132.2	120.3	167.8	120.2	120.1	147.5	212.1	High	High	High	High	High	High	High	High	High	High	High		0		1.1829	0.327442
Q8C3Q9	Caspase-9 OS=Mus musculus OX=10090 GN=Casp9 PE=1 SV=1	6	1	2	1	1	454	49.9	6.83	0	0	1	1	0	9.78	10.5	18.69	24.91	9.7	11.6	9.3	8.4	9.9	9.6	11.1	7.7	14.6	9.5	High	High	High	High	High	High	High	High	High	High	High		0		1.07362	0.632592
P24270	Catalase OS=Mus musculus OX=10090 GN=Cat PE=1 SV=4	68	31	278	31	1	527	59.8	7.88	2600	573.69	30	31	0	29647.9	27055.4	5.63	7.99	28179.6	29332.8	32345.7	28547.3	29834.1	26634.8	24936.9	30616.1	27188	25901.4	High	High	High	High	High	High	High	High	High	High	High	Oxidation [P336]	1	Oxidation [P336]	0.912558	0.0161633
Q8BIG7	Catechol O-methyltransferase domain-containing protein 1 OS=Mus musculus OX=10090 GN=Comtd1 PE=1 SV=1	23	5	21	5	1	262	28.9	8.32	282	41.55	5	5	0	1120.58	1231.06	5.55	6.17	1133.1	1040.3	1186.2	1110.7	1132.6	1164.8	1246.2	1356.3	1195.5	1192.5	High	High	High	High	High	High	High	High	High	High	High		0		1.09859	0.0292476
O88587	Catechol O-methyltransferase OS=Mus musculus OX=10090 GN=Comt PE=1 SV=2	35	9	43	9	1	265	29.5	5.83	343	89.31	9	9	0	3213.92	3100.76	6.16	4.03	3302.1	2903.3	3416.4	3110	3337.8	3093.5	2908.3	3247.2	3091.8	3163	High	High	High	High	High	High	High	High	High	High	High		0		0.964791	0.0625286
P26231	Catenin alpha-1 OS=Mus musculus OX=10090 GN=Ctnna1 PE=1 SV=1	50	41	164	31	1	906	100	6.23	1304	337.9	37	41	10	13658.2	14162.3	5.08	4.21	12548.6	14065	13965.9	14452.4	13259.2	15064.4	13645.8	14220.3	14288.8	13592.1	High	High	High	High	High	High	High	High	High	High	High		0		1.03691	0.388407
Q61301	Catenin alpha-2 OS=Mus musculus OX=10090 GN=Ctnna2 PE=1 SV=3	12	10	52	1	1	953	105.2	5.71	418	106.37	10	10	0	263.02	264.66	17.42	18.82	194.5	320.1	274.4	260.2	265.9	339.3	218.7	266.4	279.3	219.6	High	High	High	High	High	High	High	High	High	High	High		0		1.00624	0.970093
Q65CL1	Catenin alpha-3 OS=Mus musculus OX=10090 GN=Ctnna3 PE=1 SV=2	12	10	24	9	1	895	99.7	6.52	88	38.2	10	10	0	813.32	852.02	4.74	7.01	798.4	859.5	858.3	783.6	766.8	850.1	814.6	785.9	866.5	943	High	High	High	High	High	High	High	High	High	High	High		0		1.04758	0.437554
Q02248	Catenin beta-1 OS=Mus musculus OX=10090 GN=Ctnnb1 PE=1 SV=1	30	21	64	17	1	781	85.4	5.86	570	127.41	19	21	0	3812.64	4026.6	4.5	3.14	3789.7	4011.1	3768.6	3957.4	3536.4	4035.7	3891.5	3905	4149	4151.8	High	High	High	High	High	High	High	High	High	High	High		0		1.05612	0.144812
P30999	Catenin delta-1 OS=Mus musculus OX=10090 GN=Ctnnd1 PE=1 SV=2	17	15	32	15	1	938	104.9	6.87	153	60.15	11	15	0	2056.18	2242.82	5	7.17	2016.5	2185.6	2127.7	2035.6	1915.5	2420.2	2321.8	2061.4	2082.8	2327.9	High	High	High	High	High	High	High	High	High	High	High		0		1.09077	0.12358
P10605	Cathepsin B OS=Mus musculus OX=10090 GN=Ctsb PE=1 SV=2	37	10	106	10	1	339	37.3	5.91	962	220.41	10	10	0	6107	6367.04	3.21	6.48	6237.7	5998.5	6037.7	5865	6396.1	6764.5	5820.9	6235.5	6796.4	6217.9	High	High	High	High	High	High	High	High	High	High	High		0		1.04258	0.289634
P18242	Cathepsin D OS=Mus musculus OX=10090 GN=Ctsd PE=1 SV=1	42	14	257	14	1	410	44.9	7.15	3277	566.91	14	14	0	23408.6	24261.2	5.55	15.83	24627.6	21833.4	23048.6	22335	25198.3	20839.9	21801	25791.9	30274.7	22598.4	High	High	High	High	High	High	High	High	High	High	High	Oxidation [P326]	0		1.03642	0.705269
Q9R013	Cathepsin F OS=Mus musculus OX=10090 GN=Ctsf PE=1 SV=1	3	1	2	1	1	462	51.6	6.55	38	6.34	1	1	0	140.46	161.58	7.88	33.04	124.3	153.2	132.8	149.2	142.8	134.7	123.5	152.4	255.2	142.1	High	High	High	High	High	High	High	High	High	High	High		0		1.15036	0.406379
P06797	Cathepsin L1 OS=Mus musculus OX=10090 GN=Ctsl PE=1 SV=2	18	4	10	4	1	334	37.5	6.83	81	23.18	4	4	0	834.6	866.22	6.76	5.38	780	783	832.6	924.7	852.7	834.8	845.4	822.9	934.4	893.6	High	High	High	High	High	High	High	High	High	High	High		0		1.03789	0.0823453
O70370	Cathepsin S OS=Mus musculus OX=10090 GN=Ctss PE=1 SV=2	9	2	4	2	1	340	38.4	6.96	15	7.58	2	2	0	116.94	121.74	6.12	14.42	118.9	112.8	128.2	108.4	116.4	113.6	122.9	104.6	150.8	116.8	High	High	High	High	High	High	High	High	High	High	High		0		1.04105	0.682025
Q9WUU7	Cathepsin Z OS=Mus musculus OX=10090 GN=Ctsz PE=1 SV=1	20	6	16	6	1	306	34	6.6	164	30.96	6	6	0	864.4	1038.86	8.43	9.21	979.2	801.2	861.4	896.2	784	1169.4	1034.6	925	1089.6	975.7	High	High	High	High	High	High	High	High	High	High	High		0		1.20183	0.00378146
E9Q355	Cation channel sperm-associated protein subunit gamma 1 OS=Mus musculus OX=10090 GN=Catsperg1 PE=2 SV=1	1	1	2	1	1	1151	132.3	7.84	0	0	1	1	0	111.54	118.12	5.1	6.17	110.6	121.2	111.6	103.4	110.9	119.1	115.9	109.8	129.7	116.1	Medium	Medium	Medium	Medium	Medium	Medium	Medium	Medium	Medium	Medium	Medium		0		1.05899	0.297904
P24668	Cation-dependent mannose-6-phosphate receptor OS=Mus musculus OX=10090 GN=M6pr PE=1 SV=1	32	9	37	9	1	278	31.2	5.39	363	79.09	8	9	0	3257	3551.2	2.19	4.82	3325.1	3244.4	3331.7	3239.3	3144.5	3749.8	3587.5	3545.5	3278.4	3594.8	High	High	High	High	High	High	High	High	High	High	High		0		1.09033	0.0179285
Q07113	Cation-independent mannose-6-phosphate receptor OS=Mus musculus OX=10090 GN=Igf2r PE=1 SV=1	15	32	75	32	1	2483	273.6	5.71	551	156.81	29	32	0	5202.96	5566.64	5.52	7.78	4801.8	5364.5	5412.3	5519.3	4916.9	5537.3	5225.4	5183.3	5626	6261.2	High	High	High	High	High	High	High	High	High	High	High		0		1.0699	0.288621
Q9CTG6	Cation-transporting ATPase 13A2 OS=Mus musculus OX=10090 GN=Atp13a2 PE=2 SV=3	4	2	2	2	1	1169	126.4	8.12		2.59		2	0	60.86	62.36	33.74	43.8	43.2	90	71.1	36.6	63.4	110.4	44.5	57.5	51.9	47.5	Medium	Medium	Medium	Medium	Medium	Medium	Medium	Medium	Medium	Medium	Medium	Oxidation [P1164]	1	Oxidation [P1164]	1.02465	0.940975
O54724	Caveolae-associated protein 1 OS=Mus musculus OX=10090 GN=Cavin1 PE=1 SV=1	54	21	490	21	1	392	43.9	5.52	8127	1171.15	19	20	0	48657.2	50214.5	3.89	3.05	47479.4	49987	47966.6	51180.9	46672.3	50871	48555.5	51811	48594.3	51240.5	High	High	High	High	High	High	High	High	High	High	High	Oxidation [P12]; Acetyl [N-Term]	1	Oxidation [P12]	1.032	0.351874
Q63918	Caveolae-associated protein 2 OS=Mus musculus OX=10090 GN=Cavin2 PE=1 SV=3	61	26	325	25	1	418	46.7	5.21	3596	765.69	25	25	1	32951.9	34023.1	2.35	5.14	32053.9	32948.5	33542.4	33962.4	32252.1	35568	32409.2	35231.2	31847.8	35059.1	High	High	High	High	High	High	High	High	High	High	High		0		1.03251	0.365857
Q91VJ2	Caveolae-associated protein 3 OS=Mus musculus OX=10090 GN=Cavin3 PE=1 SV=1	55	10	39	10	1	260	27.8	5.57	261	52.02	10	9	0	2545.4	2703.78	4.41	2.03	2749.5	2498.6	2479.1	2535	2464.8	2790.7	2642.4	2682.9	2689.9	2713	High	High	High	High	High	High	High	High	High	High	High		0		1.06222	0.0103089
A2AMM0	Caveolae-associated protein 4 OS=Mus musculus OX=10090 GN=Cavin4 PE=1 SV=1	48	14	115	14	1	362	41	8.65	1069	216.44	14	14	0	14015.6	13283.9	6.79	7.16	12948.7	14263.2	13785.3	15648.4	13432.6	12174.9	12564.5	14128	14357.3	13194.7	High	High	High	High	High	High	High	High	High	High	High		0		0.94779	0.114659
P49817	Caveolin-1 OS=Mus musculus OX=10090 GN=Cav1 PE=1 SV=1	57	10	270	8	1	178	20.5	6.02	1354	454.86	10	10	3	38012.4	41197.4	2.58	5.25	39389.3	37720.4	38894.2	36993.7	37064.3	43745.9	39748	42559.5	38353.9	41579.5	High	High	High	High	High	High	High	High	High	High	High	Oxidation [P75]	0		1.08379	0.00737155
Q9WVC3	Caveolin-2 OS=Mus musculus OX=10090 GN=Cav2 PE=1 SV=1	32	4	20	4	1	162	18.2	5.63	261	44.1	4	3	0	2572.4	2573.84	11.42	12.33	2891.5	2531.5	2295.1	2708.5	2435.4	2963.9	2512.4	2788.5	2139.3	2465.1	High	High	High	High	High	High	High	High	High	High	High		0		1.00056	0.993625
P51637	Caveolin-3 OS=Mus musculus OX=10090 GN=Cav3 PE=1 SV=1	32	5	53	3	1	151	17.3	5.81	142	82.14	4	5	0	3276.18	3193.1	7.1	6.71	2940.5	3499.7	3533.9	3327.8	3079	3521.5	3302.1	3055.5	3043.7	3042.7	High	High	High	High	High	High	High	High	High	High	High	Acetyl [N-Term]	0		0.974641	0.669549
P10148	C-C motif chemokine 2 OS=Mus musculus OX=10090 GN=Ccl2 PE=1 SV=1	4	1	2	1	1	148	16.3	9.77	0	2.32	1	1	0	517.26	454.02	7.33	9.73	479	530.7	495.3	575.1	506.2	428.9	405.7	437.8	482	515.7	High	High	High	High	High	High	High	High	High	High	High		0		0.87774	0.0488139
Q8K1J6	CCA tRNA nucleotidyltransferase 1, mitochondrial OS=Mus musculus OX=10090 GN=Trnt1 PE=1 SV=1	31	13	40	13	1	434	49.9	8.56	251	81.25	13	13	0	4580.84	4758.26	5.24	0.99	4347.4	4469.1	4868	4676.3	4543.4	4737.3	4684.7	4785.5	4785.7	4798.1	High	High	High	High	High	High	High	High	High	High	High		0		1.03873	0.0880015
Q8C5L3	CCR4-NOT transcription complex subunit 2 OS=Mus musculus OX=10090 GN=Cnot2 PE=1 SV=2	3	2	4	2	1	540	59.7	7.66	22	4.86	2	2	0	242.24	250	6.12	6.25	236.6	237	235	270.2	232.4	255.7	230.9	261.5	265.9	236	High	High	High	High	High	High	High	High	High	High	High		0		1.03203	0.295921
Q8K0V4	CCR4-NOT transcription complex subunit 3 OS=Mus musculus OX=10090 GN=Cnot3 PE=1 SV=1	1	1	2	1	1	751	81.9	6.2	0	2.23	1	1	0	#DIV/0!	#DIV/0!													High	High	High	High	High	High	High	High	High	High	High		0		#DIV/0!	#DIV/0!
Q9JKY0	CCR4-NOT transcription complex subunit 9 OS=Mus musculus OX=10090 GN=Cnot9 PE=1 SV=1	6	1	1	1	1	299	33.6	8.03		2.69		1	0	#DIV/0!	#DIV/0!													High	High	High	High	High	High	High	High	High	High	High		0		#DIV/0!	#DIV/0!
O35566	CD151 antigen OS=Mus musculus OX=10090 GN=Cd151 PE=1 SV=2	23	7	35	7	1	253	28.2	7.47	234	51.61	7	6	0	5229.78	5285.62	4.07	3.41	5145.9	5029.6	5444.7	5385.8	5142.9	5525.6	5219.5	5394.5	5234.1	5054.4	High	High	High	High	High	High	High	High	High	High	High		0		1.01068	0.604611
Q9JLQ0	CD2-associated protein OS=Mus musculus OX=10090 GN=Cd2ap PE=1 SV=3	5	3	5	3	1	637	70.4	6.38	45	10.33	2	3	0	138.9	140.08	4.51	7.98	141.8	129.3	139.4	147	137	154.8	147.8	127.5	132.2	138.1	High	High	High	High	High	High	High	High	High	High	High		0		1.0085	0.866412
P15379	CD44 antigen OS=Mus musculus OX=10090 GN=Cd44 PE=1 SV=3	4	3	7	3	1	778	85.6	4.96	41	5.56	3	3	0	628.18	665.7	5.39	3.92	669.4	584.2	664.9	620.7	601.7	657	681.4	626.1	669.6	694.4	High	High	High	High	High	High	High	High	High	High	High		0		1.05973	0.243231
O55186	CD59A glycoprotein OS=Mus musculus OX=10090 GN=Cd59a PE=2 SV=1	14	1	2	1	1	123	13.6	7.47	31	5.53	1	1	0	78.88	80.04	6.43	8.46	80.3	79.7	72.1	75.9	86.4	85.1	70.5	75.2	84	85.4	High	High	High	High	High	High	High	High	High	High	High		0		1.01471	0.71659
P41731	CD63 antigen OS=Mus musculus OX=10090 GN=Cd63 PE=1 SV=2	3	1	4	1	1	238	25.7	6.98	30	5.21	1	1	0	985.4	1090.54	5.53	8.7	1054.8	943.9	973.1	1031.7	923.5	1039.8	998.3	1062	1244.9	1107.7	High	High	High	High	High	High	High	High	High	High	High		0		1.1067	0.0663259
P35762	CD81 antigen OS=Mus musculus OX=10090 GN=Cd81 PE=1 SV=2	24	4	105	4	1	236	25.8	5.83	2371	307.01	4	3	0	6699.48	6918.82	4.07	4.23	6592.2	6814	7103.3	6339.6	6648.3	7338.4	6898	6649.2	6648.7	7059.8	High	High	High	High	High	High	High	High	High	High	High		0		1.03274	0.332868
P40237	CD82 antigen OS=Mus musculus OX=10090 GN=Cd82 PE=1 SV=1	4	1	4	1	1	266	29.6	5.02	22	7.58	1	1	0	368.3	366.3	5.93	5.86	403.2	339.8	377.2	355	366.3	373.3	361.4	350	399.9	346.9	High	High	High	High	High	High	High	High	High	High	High		0		0.99457	0.900068
P40240	CD9 antigen OS=Mus musculus OX=10090 GN=Cd9 PE=1 SV=2	27	4	15	4	1	226	25.2	7.23	50	29.09	4	4	0	1950.22	1955.2	8.45	6.5	2005.3	1755.1	2023.5	1901.4	2065.8	1997.6	1779.5	1870.2	2043.4	2085.3	High	High	High	High	High	High	High	High	High	High	High		0		1.00255	0.921068
Q9Z0M6	CD97 antigen OS=Mus musculus OX=10090 GN=Cd97 PE=1 SV=2	3	2	4	2	1	818	90.4	7.39	0	6.39	2	2	0	67.92	71.48	15.26	22.29	71.6	78.2	76.9	62.5	50.4	73	72.7	63.8	95.6	52.3	High	High	High	High	High	High	High	High	High	High	High		0		1.05241	0.674576
Q8BIF0	CD99 antigen-like protein 2 OS=Mus musculus OX=10090 GN=Cd99l2 PE=1 SV=1	22	4	8	4	1	237	25.4	4.86	82	23.62	4	4	0	1024.42	1090.54	3.49	5.34	995.9	1052.4	1054.5	1033.4	985.9	1097.9	1182.7	1081.4	1065.9	1024.8	High	High	High	High	High	High	High	High	High	High	High		0		1.06454	0.0345371
Q91W92	Cdc42 effector protein 1 OS=Mus musculus OX=10090 GN=Cdc42ep1 PE=1 SV=1	4	1	2	1	1	409	43.1	7.21	18	2.99	1	1	0	#DIV/0!	#DIV/0!													High	High	High	High	High	High	High	High	High	High	High		0		#DIV/0!	#DIV/0!
Q9JM96	Cdc42 effector protein 4 OS=Mus musculus OX=10090 GN=Cdc42ep4 PE=1 SV=1	10	2	4	2	1	349	37.8	5.36	64	11.45	2	2	0	217.74	220.76	6.09	4.9	202.9	205.9	232.9	232.3	214.7	234.4	211.1	212.2	230.3	215.8	High	High	High	High	High	High	High	High	High	High	High		0		1.01387	0.737043
Q8CJ53	Cdc42-interacting protein 4 OS=Mus musculus OX=10090 GN=Trip10 PE=1 SV=2	33	18	48	18	1	603	68.4	5.9	400	97.25	17	18	0	4030.26	3983	9.53	3.86	3450.8	4512.9	4010.1	4368.3	3809.2	4012.8	3759.6	3907.5	4146.9	4088.2	High	High	High	High	High	High	High	High	High	High	High		0		0.988274	0.843672
Q91WS0	CDGSH iron-sulfur domain-containing protein 1 OS=Mus musculus OX=10090 GN=Cisd1 PE=1 SV=1	57	7	198	7	1	108	12.1	9.06	2233	427.68	7	6	0	20920.4	21418.5	2.69	4.78	21258	20082	21242.8	20965.9	21053.5	20069.3	20850.1	22472.3	22382.2	21318.4	High	High	High	High	High	High	High	High	High	High	High		0		1.02381	0.345773
Q9CQB5	CDGSH iron-sulfur domain-containing protein 2 OS=Mus musculus OX=10090 GN=Cisd2 PE=1 SV=1	56	7	47	7	1	135	15.2	9.51	479	102.95	7	6	0	4048	4189.82	2.51	2.53	4049.4	3957.8	4192.3	3984.2	4056.3	4175.4	4233.3	4187.3	4030.8	4322.3	High	High	High	High	High	High	High	High	High	High	High		0		1.03503	0.0664935
B1AR13	CDGSH iron-sulfur domain-containing protein 3, mitochondrial OS=Mus musculus OX=10090 GN=Cisd3 PE=1 SV=1	52	8	50	8	1	137	15.7	9.79	192	83.62	8	8	0	6690.86	6747.76	9.07	9.43	5892.1	6925.8	6221.5	7646.3	6768.6	6432.7	6071.5	6899.2	7753.3	6582.1	High	High	High	High	High	High	High	High	High	High	High		0		1.0085	0.846132
Q99LM2	CDK5 regulatory subunit-associated protein 3 OS=Mus musculus OX=10090 GN=Cdk5rap3 PE=1 SV=1	12	7	13	7	1	503	57	4.83	42	19.05	6	6	0	955.64	1130.7	13.44	18.7	777	1147.8	970.3	1018.2	864.9	1116.8	983.6	946	1126	1481.1	High	High	High	High	High	High	High	High	High	High	High		0		1.18319	0.273525
F6RXI4	cDNA sequence BC067074 OS=Mus musculus OX=10090 GN=BC067074 PE=4 SV=2	1	1	1	1	1	2391	265.6	6.52		0		1	0	#DIV/0!	#DIV/0!													Medium	Medium	Medium	Medium	Medium	Medium	Medium	Medium	Medium	Medium	Medium		0		#DIV/0!	#DIV/0!
Q8BHF7	CDP-diacylglycerol--glycerol-3-phosphate 3-phosphatidyltransferase, mitochondrial OS=Mus musculus OX=10090 GN=Pgs1 PE=1 SV=1	5	2	4	2	1	553	62.5	8.9	19	8.94	2	2	0	123.42	125.52	7.5	3.72	117.6	135.1	132.7	116.2	115.5	129.3	121.4	125.6	130.9	120.4	High	High	High	High	High	High	High	High	High	High	High		0		1.01702	0.719389
Q8VDP6	CDP-diacylglycerol--inositol 3-phosphatidyltransferase OS=Mus musculus OX=10090 GN=Cdipt PE=1 SV=1	18	4	14	4	1	213	23.6	8.27	66	20.12	4	4	0	1154.44	1237.36	6.96	5.11	1014.4	1235.8	1221	1141.2	1159.8	1346.3	1204.3	1194.7	1202.2	1239.3	High	High	High	High	High	High	High	High	High	High	High		0		1.07183	0.278257
Q8VDP4	Cell cycle and apoptosis regulator protein 2 OS=Mus musculus OX=10090 GN=Ccar2 PE=1 SV=2	12	9	20	9	1	922	102.9	5.25	171	33.95	9	9	0	793.2	821.06	10.15	9.37	702.8	911.5	824.1	820.6	707	904.2	874.9	713	776.9	836.3	High	High	High	High	High	High	High	High	High	High	High		0		1.03512	0.659987
Q8VEK0	Cell cycle control protein 50A OS=Mus musculus OX=10090 GN=Tmem30a PE=1 SV=1	20	6	20	6	1	364	41	8.37	235	42.85	6	6	0	1360.62	1412.98	2.12	6.45	1318.1	1363.8	1407.9	1358.9	1354.4	1450.8	1350.2	1285.8	1495.3	1482.8	High	High	High	High	High	High	High	High	High	High	High		0		1.03848	0.370964
Q9JKC6	Cell cycle exit and neuronal differentiation protein 1 OS=Mus musculus OX=10090 GN=Cend1 PE=1 SV=1	35	5	14	5	1	149	15	8.97	123	19.36	4	5	0	1088.48	1150.3	7.07	10.44	1181.3	989.3	1044.4	1050.9	1176.5	1025.7	1046	1173.4	1184.3	1322.1	High	High	High	High	High	High	High	High	High	High	High		0		1.05679	0.335716
Q9D9K3	Cell death regulator Aven OS=Mus musculus OX=10090 GN=Aven PE=1 SV=2	14	3	6	3	1	342	37.2	4.98	32	18.82	2	3	0	612.3	552.34	8.6	5.62	535.1	584.3	606.2	666.3	669.6	510.7	592.6	555.1	567.4	535.9	High	High	High	High	High	High	High	High	High	High	High		0		0.902074	0.0780211
Q9DB75	Cell death-inducing p53-target protein 1 OS=Mus musculus OX=10090 GN=Cdip1 PE=2 SV=1	4	1	2	1	1	208	21.8	5.66	23	3.08	1	1	0	200.36	178.96	8.97	3.57	199.5	211.3	192.3	216.7	182	181.8	188	178.1	175.9	171	High	High	High	High	High	High	High	High	High	High	High		0		0.893192	0.0152567
P60766	Cell division control protein 42 homolog OS=Mus musculus OX=10090 GN=Cdc42 PE=1 SV=2	48	8	84	2	1	191	21.2	6.55	911	174.58	8	8	4	6162.48	6579.32	3.81	6.58	6432.2	5924.8	6451.4	6049.6	5954.4	7248.8	6738.3	6345.7	6131.1	6432.7	High	High	High	High	High	High	High	High	High	High	High		0		1.06764	0.0908194
D3Z3I0	Cell division cycle 20B OS=Mus musculus OX=10090 GN=Cdc20b PE=4 SV=1	2	1	1	1	1	519	57.4	8.69		2.27		1	0	#DIV/0!	#DIV/0!													Medium	Medium	Medium	Medium	Medium	Medium	Medium	Medium	Medium	Medium	Medium		0		#DIV/0!	#DIV/0!
Q6A068	Cell division cycle 5-like protein OS=Mus musculus OX=10090 GN=Cdc5l PE=1 SV=2	10	5	10	5	1	802	92.1	8.02	54	20.8	4	5	0	347.08	361.88	5.26	6.99	347.2	371.6	351.9	324.1	340.6	378	368.9	317.1	374.4	371	High	High	High	High	High	High	High	High	High	High	High		0		1.04264	0.380901
Q8CH18	Cell division cycle and apoptosis regulator protein 1 OS=Mus musculus OX=10090 GN=Ccar1 PE=1 SV=1	8	9	17	7	1	1146	132	5.76	50	22.96	8	9	1	1227.96	1289.06	14.02	8.98	979.4	1442.7	1210.3	1382	1125.4	1322.8	1209.8	1136.7	1346.7	1429.3	High	High	High	High	High	High	High	High	High	High	High		0		1.04976	0.615493
Q8CII2	Cell division cycle protein 123 homolog OS=Mus musculus OX=10090 GN=Cdc123 PE=1 SV=2	5	1	2	1	1	336	38.8	4.67	16	3.42	1	1	0	#DIV/0!	#DIV/0!													High	High	High	High	High	High	High	High	High	High	High		0		#DIV/0!	#DIV/0!
Q8R349	Cell division cycle protein 16 homolog OS=Mus musculus OX=10090 GN=Cdc16 PE=1 SV=1	3	2	3	2	1	620	71.4	5.76	0	5.79	1	2	0	241.4	235.66	7.15	5.38	222.6	266.7	235	255.9	226.8	216.1	237.2	231.6	246.8	246.6	High	High	High	High	High	High	High	High	High	High	High		0		0.976222	0.505459
Q8R1U2	Cell growth regulator with EF hand domain protein 1 OS=Mus musculus OX=10090 GN=Cgref1 PE=1 SV=1	2	1	2	1	1	281	30.8	4.31		4.25		1	0	475.18	484.7	10.9	24.63	496.4	395.3	469.9	459.6	554.7	383.6	404.2	482.8	684.8	468.1	Medium	Medium	Medium	Medium	Medium	Medium	Medium	Medium	Medium	Medium	Medium		0		1.02003	0.880574
Q08288	Cell growth-regulating nucleolar protein OS=Mus musculus OX=10090 GN=Lyar PE=1 SV=2	2	1	3	1	1	388	43.7	9.5	0	2.19	1	1	0	#DIV/0!	#DIV/0!													Medium	Medium	Medium	Medium	Medium	Medium	Medium	Medium	Medium	Medium	Medium		0		#DIV/0!	#DIV/0!
Q8R2Y2	Cell surface glycoprotein MUC18 OS=Mus musculus OX=10090 GN=Mcam PE=1 SV=1	33	21	68	21	1	648	71.5	5.83	547	148.11	18	21	0	4018.32	4548.12	6	5.95	4395.7	3959.4	4179.6	3821.1	3735.8	4844.9	4449.5	4193.9	4457.1	4795.2	High	High	High	High	High	High	High	High	High	High	High		0		1.13185	0.0344962
Q5FWI3	Cell surface hyaluronidase OS=Mus musculus OX=10090 GN=Cemip2 PE=1 SV=1	1	1	2	1	1	1383	153.7	7.78	38	2.99	1	1	0	137.06	144.86	4.94	2.03	136.8	131.9	142.7	146.2	127.7	148.7	146.9	141.3	143.5	143.9	High	High	High	High	High	High	High	High	High	High	High		0		1.05691	0.128982
P53996	Cellular nucleic acid-binding protein OS=Mus musculus OX=10090 GN=Cnbp PE=1 SV=2	52	8	42	1	1	178	19.6	7.58	251	67.63	8	8	0	#DIV/0!	#DIV/0!													High	High	High	High	High	High	High	High	High	High	High		0		#DIV/0!	#DIV/0!
A2AM05	Centlein OS=Mus musculus OX=10090 GN=Cntln PE=1 SV=1	1	1	4	1	1	1397	160.6	7.99	0	6.8	1	1	0	1410.84	1383.48	11.44	18.35	1420.3	1494.1	1582.5	1180.3	1377	1698.1	1490	1092.4	1153.7	1483.2	High	High	High	High	High	High	High	High	High	High	High		0		0.980607	0.840706
Q9R1K9	Centrin-2 OS=Mus musculus OX=10090 GN=Cetn2 PE=1 SV=1	11	2	2	2	1	172	19.8	5		4.82		2	0	126.7	139.12	9.98	11.41	121.4	126.6	146.5	111	128	121.5	141.1	135.9	132.6	164.5	High	High	High	High	High	High	High	High	High	High	High		0		1.09803	0.205161
O35648	Centrin-3 OS=Mus musculus OX=10090 GN=Cetn3 PE=1 SV=1	12	1	2	1	1	167	19.5	4.78	0	5.75	1	1	0	176.84	183.22	16.38	16.29	144.6	192.2	188.4	144.5	214.5	227	175.1	173.4	146.3	194.3	High	High	High	High	High	High	High	High	High	High	High		0		1.03608	0.758566
Q8CB62	Centrobin OS=Mus musculus OX=10090 GN=Cntrob PE=2 SV=2	1	1	2	1	1	887	99.3	5.55	0	2.4	1	1	0	100.86	99.08	6.92	12.42	109.9	95.6	107.4	91.3	100.1	82.6	92.7	105.5	115	99.6	High	High	High	High	High	High	High	High	High	High	High		0		0.982352	0.836284
E9Q3P4	Centromere protein F OS=Mus musculus OX=10090 GN=Cenpf PE=1 SV=1	1	3	3	3	1	2997	342.3	5.16		2.16		3	0	250.62	262.88	8.41	10.15	230.3	246.5	247.8	286.8	241.7	296.9	281.6	255.1	252	228.8	High	High	High	High	High	High	High	High	High	High	High		0		1.04892	0.529147
Q9QYM8	Centromere protein H OS=Mus musculus OX=10090 GN=Cenph PE=1 SV=1	5	2	8	2	1	241	28.1	5.54	23	6.51	1	2	0	903.26	952.9	4	3.15	849.1	954.9	923.2	907.6	881.5	918.7	951.6	928.2	985.6	980.4	High	High	High	High	High	High	High	High	High	High	High		0		1.05496	0.0728699
Q8K1K4	Centromere protein I OS=Mus musculus OX=10090 GN=Cenpi PE=2 SV=1	1	1	1	1	1	746	85.3	8.05		1.7		1	0	#DIV/0!	#DIV/0!													High	High	High	High	High	High	High	High	High	High	High		0		#DIV/0!	#DIV/0!
Q569L8	Centromere protein J OS=Mus musculus OX=10090 GN=Cenpj PE=2 SV=2	0	1	3	1	1	1344	153	6.55		4.92		1	0	#DIV/0!	#DIV/0!													High	High	High	High	High	High	High	High	High	High	High		0		#DIV/0!	#DIV/0!
Q6RT24	Centromere-associated protein E OS=Mus musculus OX=10090 GN=Cenpe PE=1 SV=1	0	1	1	1	1	2474	286.3	5.31		2.03		1	0	298.02	493.76	14.48	76.79	279	363	332.9	246.6	268.6	366.4	254.3	233.7	462.7	1151.7	Medium	Medium	Medium	Medium	Medium	Medium	Medium	Medium	Medium	Medium	Medium		0		1.6568	0.343282
Q7TSG1	Centrosomal protein of 120 kDa OS=Mus musculus OX=10090 GN=Cep120 PE=1 SV=1	1	1	2	1	1	988	112.5	5.94	19	0	1	1	0	125.86	126.84	5.67	10.55	118.8	122.7	133.7	127.9	126.2	146.8	115.7	114.4	132.5	124.8	Medium	Medium	Medium	Medium	Medium	Medium	Medium	Medium	Medium	Medium	Medium	Oxidation [P84]	0		1.00779	0.906345
Q0VBV7	Centrosomal protein of 126 kDa OS=Mus musculus OX=10090 GN=Cep126 PE=2 SV=1	1	1	1	1	1	1103	123.6	9.07		0		1	0	#DIV/0!	#DIV/0!													Medium	Medium	Medium	Medium	Medium	Medium	Medium	Medium	Medium	Medium	Medium		0		#DIV/0!	#DIV/0!
Q8BI22	Centrosomal protein of 128 kDa OS=Mus musculus OX=10090 GN=Cep128 PE=1 SV=2	1	1	1	1	1	1102	128.4	6.52	0		1		0	#DIV/0!	#DIV/0!													Medium	Medium	Medium	Medium	Medium	Medium	Medium	Medium	Medium	Medium	Medium	Oxidation [P862]	1	Oxidation [P862]	#DIV/0!	#DIV/0!
Q62036	Centrosomal protein of 131 kDa OS=Mus musculus OX=10090 GN=Cep131 PE=1 SV=2	2	1	2	1	1	1060	120.2	8.72	0	3.55	1	1	0	102	103.24	9.8	5.7	88.9	108	93.3	103.5	116.3	100.5	98.7	110.5	108.6	97.9	Medium	Medium	Medium	Medium	Medium	Medium	Medium	Medium	Medium	Medium	Medium		0		1.01216	0.860321
Q6ZQ06	Centrosomal protein of 162 kDa OS=Mus musculus OX=10090 GN=Cep162 PE=1 SV=2	1	1	9	1	1	1403	160.8	5.53	0	6.92	1	1	0	1642.76	1757.92	16.78	15.59	2045.3	1779.3	1510.7	1465.2	1413.3	1770.2	2017.1	1511.8	1451.7	2038.8	Medium	Medium	Medium	Medium	Medium	Medium	Medium	Medium	Medium	Medium	Medium		0		1.0701	0.488762
Q5DU05	Centrosomal protein of 164 kDa OS=Mus musculus OX=10090 GN=Cep164 PE=1 SV=2	1	2	3	1	1	1446	162.5	5.31	0	4.95	1	2	0	201.24	198.8	3.68	10.49	199.9	197.9	210.4	197.4	200.6	182.2	179.1	223.2	219	190.5	High	High	High	High	High	High	High	High	High	High	High		0		0.987875	0.782758
Q6A078	Centrosomal protein of 290 kDa OS=Mus musculus OX=10090 GN=Cep290 PE=1 SV=2	1	4	15	2	1	2472	288.9	6.1	0	26.55	1	4	0	334.6	629.78	48.06	102.11	386.7	580.7	308.4	192.9	204.3	464.7	239.2	187	504.5	1753.5	High	High	High	High	High	High	High	High	High	High	High		0		1.88219	0.423651
Q8BT07	Centrosomal protein of 55 kDa OS=Mus musculus OX=10090 GN=Cep55 PE=1 SV=2	2	1	2	1	1	462	53.9	7.94	0		1		0	12.94	13.38	23.74	17.68	11.7	7.9	16.5	13.7	14.9	11.1	12.1	16.7	15	12	Medium	Medium	Medium	Medium	Medium	Medium	Medium	Medium	Medium	Medium	Medium		0		1.034	0.724984
Q8CEE0	Centrosomal protein of 57 kDa OS=Mus musculus OX=10090 GN=Cep57 PE=1 SV=2	2	1	2	1	1	500	56.9	9.07	0	2.17	1	1	0	#DIV/0!	#DIV/0!													High	High	High	High	High	High	High	High	High	High	High		0		#DIV/0!	#DIV/0!
Q9D5R3	Centrosomal protein of 83 kDa OS=Mus musculus OX=10090 GN=Cep83 PE=1 SV=2	2	2	4	1	1	692	81.9	6.61	0	4.73	2	2	0	170.24	168.52	6.11	3.53	188.7	162.4	163.4	170.8	165.9	165.1	169.1	176.3	171.4	160.7	High	High	High	High	High	High	High	High	High	High	High		0		0.989897	0.796745
Q8BMK0	Centrosomal protein of 85 kDa OS=Mus musculus OX=10090 GN=Cep85 PE=1 SV=2	1	1	1	1	1	761	85.3	6.24		0		1	0	#DIV/0!	#DIV/0!													Medium	Medium	Medium	Medium	Medium	Medium	Medium	Medium	Medium	Medium	Medium		0		#DIV/0!	#DIV/0!
Q9DBS8	Centrosomal protein POC5 OS=Mus musculus OX=10090 GN=Poc5 PE=2 SV=1	2	1	1	1	1	558	60.9	8.09		2.75		1	0	302.56	317.28	7.21	5.79	276	295	323	333	285.8	286.7	326.6	331.6	327.7	313.8	Medium	Medium	Medium	Medium	Medium	Medium	Medium	Medium	Medium	Medium	Medium		0		1.04865	0.0952303
Q60952	Centrosome-associated protein CEP250 OS=Mus musculus OX=10090 GN=Cep250 PE=1 SV=4	1	2	2	2	1	2414	276.6	5.07	0	2.51	1	1	0	152.42	163.54	37.64	19.23	139.7	244.8	171.8	120.9	84.9	210.4	151.8	129.2	178	148.3	Medium	Medium	Medium	Medium	Medium	Medium	Medium	Medium	Medium	Medium	Medium		0		1.07296	0.754918
Q924Z4	Ceramide synthase 2 OS=Mus musculus OX=10090 GN=Cers2 PE=1 SV=1	6	2	3	2	1	380	45	8.75	0	5.61	1	2	0	355.82	351	6.49	4.4	398.3	346.1	361.1	338.4	335.2	359.3	355.2	365	350.4	325.1	High	High	High	High	High	High	High	High	High	High	High		0		0.986454	0.63342
Q9D6J1	Ceramide synthase 4 OS=Mus musculus OX=10090 GN=Cers4 PE=1 SV=1	2	1	2	1	1	393	46	8.38	0	2.98	1	1	0	#DIV/0!	#DIV/0!													High	High	High	High	High	High	High	High	High	High	High		0		#DIV/0!	#DIV/0!
Q8CC36	Cerebral dopamine neurotrophic factor OS=Mus musculus OX=10090 GN=Cdnf PE=1 SV=1	25	6	18	6	1	187	21	6.9	102	29.63	6	6	0	1276.66	1289.5	5.36	3.76	1266.6	1158.1	1354.2	1278.8	1325.6	1265.4	1298.6	1364	1233	1286.5	High	High	High	High	High	High	High	High	High	High	High		0		1.01006	0.722142
Q61147	Ceruloplasmin OS=Mus musculus OX=10090 GN=Cp PE=1 SV=2	29	26	82	26	1	1061	121.1	5.85	728	202.62	25	26	0	6494.92	6922.36	10.94	7.7	7364.4	5740.3	7017.8	5580.7	6771.4	6745.2	6062	7316.9	7286.2	7201.5	High	High	High	High	High	High	High	High	High	High	High		0		1.06581	0.313727
Q922S4	cGMP-dependent 3',5'-cyclic phosphodiesterase OS=Mus musculus OX=10090 GN=Pde2a PE=1 SV=4	10	6	12	6	1	939	105.6	5.41	77	28.97	6	6	0	621.98	658.54	23.82	10.14	401.5	782.5	616.2	778.7	531	669.4	613.4	573.3	743.4	693.2	High	High	High	High	High	High	High	High	High	High	High		0		1.05878	0.665427
P0C605	cGMP-dependent protein kinase 1 OS=Mus musculus OX=10090 GN=Prkg1 PE=1 SV=1	23	14	29	14	1	671	76.3	6.04	192	52.61	13	14	0	2427.94	2525.76	9.79	10.25	2115.9	2555.9	2502.7	2763.4	2201.8	2484.9	2192.9	2463.8	2912	2575.2	High	High	High	High	High	High	High	High	High	High	High		0		1.04029	0.518704
Q9Z0X4	cGMP-inhibited 3',5'-cyclic phosphodiesterase A OS=Mus musculus OX=10090 GN=Pde3a PE=1 SV=1	2	3	4	2	1	1141	124.4	6.3	37	5.53	2	2	0	92.24	90.32	13.53	5.4	99.1	103.3	95.4	90.3	73.1	94.4	85.4	86.9	96.5	88.4	High	High	High	High	High	High	High	High	High	High	High	Oxidation [P954]	0		0.979185	0.756549
Q921W0	Charged multivesicular body protein 1a OS=Mus musculus OX=10090 GN=Chmp1a PE=1 SV=1	23	6	13	6	1	196	21.6	8.06	67	16.44	5	5	0	1368.56	1476.78	4.11	5.71	1373.6	1273.3	1435.6	1410.8	1349.5	1560.5	1557.5	1406.8	1376.7	1482.4	High	High	High	High	High	High	High	High	High	High	High		0		1.07908	0.155667
Q99LU0	Charged multivesicular body protein 1b-1 OS=Mus musculus OX=10090 GN=Chmp1b1 PE=1 SV=1	4	1	2	1	1	199	22.1	8.1	30	2.72	1	1	0	230.74	236.38	5.53	3.76	236.4	214.6	247.1	228.2	227.4	225	246.4	233.5	232.6	244.4	High	High	High	High	High	High	High	High	High	High	High		0		1.02444	0.547269
Q9DB34	Charged multivesicular body protein 2a OS=Mus musculus OX=10090 GN=Chmp2a PE=1 SV=1	20	6	17	6	1	222	25.1	5.97	200	34.72	5	6	0	596.28	623.42	4.25	2.81	579.9	561.3	625.3	617.6	597.3	624.8	617.4	610.3	611.6	653	High	High	High	High	High	High	High	High	High	High	High		0		1.04552	0.156118
Q8BJF9	Charged multivesicular body protein 2b OS=Mus musculus OX=10090 GN=Chmp2b PE=1 SV=1	8	2	6	2	1	213	23.9	8.78	59	11.11	2	2	0	981.16	1063.24	3.38	8.25	977.8	960.7	1027.6	1004.6	935.1	1167.5	1077.3	993.1	956.5	1121.8	High	High	High	High	High	High	High	High	High	High	High		0		1.08366	0.190177
Q9CQ10	Charged multivesicular body protein 3 OS=Mus musculus OX=10090 GN=Chmp3 PE=1 SV=3	14	4	6	4	1	224	25.2	5.06	0	10.58	2	4	0	694.24	717.4	2.1	4.72	672.7	687	713.8	706.5	691.2	736.2	690.8	733.2	673.1	753.7	High	High	High	High	High	High	High	High	High	High	High		0		1.03336	0.276343
Q9D8B3	Charged multivesicular body protein 4b OS=Mus musculus OX=10090 GN=Chmp4b PE=1 SV=2	42	8	35	8	1	224	24.9	4.82	422	84.03	8	8	0	2876.88	2993	3.43	2.57	2793.1	2746	3014	2880.9	2950.4	3083.3	3047.4	2937.3	2896.5	3000.5	High	High	High	High	High	High	High	High	High	High	High		0		1.04036	0.202443
Q9D7S9	Charged multivesicular body protein 5 OS=Mus musculus OX=10090 GN=Chmp5 PE=1 SV=1	31	5	26	5	1	219	24.6	4.79	417	53.89	5	5	0	576.08	579.02	3.54	2.9	567.9	584.7	589.3	552.4	586.1	592.8	586.7	556.6	565.8	593.2	High	High	High	High	High	High	High	High	High	High	High		0		1.0051	0.776829
P0C0A3	Charged multivesicular body protein 6 OS=Mus musculus OX=10090 GN=Chmp6 PE=1 SV=2	28	6	19	5	1	200	23.4	5.44	119	27.97	6	6	0	1293.52	1355.52	3.47	2.38	1273.4	1319.5	1349.6	1304.6	1220.5	1355.3	1405.2	1314.7	1351.9	1350.5	High	High	High	High	High	High	High	High	High	High	High		0		1.04793	0.087654
Q8R1T1	Charged multivesicular body protein 7 OS=Mus musculus OX=10090 GN=Chmp7 PE=1 SV=1	20	6	12	6	1	451	50.6	5.22	135	25.61	6	6	0	203.62	198.28	9.05	7.15	178.4	233.4	195.9	212	198.4	203.4	179.7	196.2	218.4	193.7	High	High	High	High	High	High	High	High	High	High	High		0		0.973775	0.704298
P97468	Chemokine-like receptor 1 OS=Mus musculus OX=10090 GN=Cmklr1 PE=1 SV=1	4	2	3	2	1	371	41.8	8.31	0	2.04	2	1	0	#DIV/0!	#DIV/0!													High	High	High	High	High	High	High	High	High	High	High		0		#DIV/0!	#DIV/0!
Q922Q9	Chitinase domain-containing protein 1 OS=Mus musculus OX=10090 GN=Chid1 PE=1 SV=1	2	1	2	1	1	393	44.9	7.97	25	2.86	1	1	0	#DIV/0!	#DIV/0!													High	High	High	High	High	High	High	High	High	High	High		0		#DIV/0!	#DIV/0!
Q921Q3	Chitobiosyldiphosphodolichol beta-mannosyltransferase OS=Mus musculus OX=10090 GN=Alg1 PE=1 SV=3	9	3	5	3	1	482	54.4	8.37	64	11.44	2	3	0	97.52	104.46	5.38	5.32	106.7	99	96	94.7	91.2	110.6	98.4	106.9	98.7	107.7	High	High	High	High	High	High	High	High	High	High	High		0		1.07116	0.0827771
Q99LI2	Chloride channel CLIC-like protein 1 OS=Mus musculus OX=10090 GN=Clcc1 PE=1 SV=1	23	9	20	9	1	539	60.6	5.68	180	44.88	9	9	0	1305.38	1293.24	6.82	1.95	1232.4	1451.9	1342.3	1298.5	1201.8	1280.2	1309.9	1272.2	1329.4	1274.5	High	High	High	High	High	High	High	High	High	High	High		0		0.9907	0.779494
Q9Z1Q5	Chloride intracellular channel protein 1 OS=Mus musculus OX=10090 GN=Clic1 PE=1 SV=3	83	17	96	16	1	241	27	5.17	1275	223.68	17	17	1	6182.26	6856.18	2.96	6.07	6199.6	6171.7	6286.9	6395.1	5858	7178.3	7026.4	6648.3	6225.7	7202.2	High	High	High	High	High	High	High	High	High	High	High		0		1.10901	0.0624968
Q9QYB1	Chloride intracellular channel protein 4 OS=Mus musculus OX=10090 GN=Clic4 PE=1 SV=3	73	15	174	14	1	253	28.7	5.59	1934	437.28	15	15	0	10717.7	11737.3	2.68	4.29	10234	11059.4	10792.7	10890.3	10612.3	12372	11452.8	11383.3	11289.6	12189	High	High	High	High	High	High	High	High	High	High	High	Oxidation [P160]	0		1.09513	0.0454141
Q8BXK9	Chloride intracellular channel protein 5 OS=Mus musculus OX=10090 GN=Clic5 PE=1 SV=1	32	7	18	6	1	251	28.3	5.94	260	42.45	6	6	0	368.96	438.42	9.46	8.73	319.9	365.9	364.5	372	422.5	401.1	407.1	451.3	496	436.6	High	High	High	High	High	High	High	High	High	High	High		0		1.18826	0.0219341
Q6X893	Choline transporter-like protein 1 OS=Mus musculus OX=10090 GN=Slc44a1 PE=1 SV=3	2	1	2	1	1	653	73	8.75	0	3.73	1	1	0	#DIV/0!	#DIV/0!													High	High	High	High	High	High	High	High	High	High	High		0		#DIV/0!	#DIV/0!
A0A1L1SU40	Choline transporter-like protein 2 (Fragment) OS=Mus musculus OX=10090 GN=Slc44a2 PE=1 SV=1	8	2	3	2	1	170	19.7	6.52		8.38		2	0	295.14	249.38	8.47	9.48	319.4	307.9	307.4	287.2	253.8	240.7	252.9	287.5	241.5	224.3	High	High	High	High	High	High	High	High	High	High	High		0		0.844955	0.0111436
Q8BY89	Choline transporter-like protein 2 OS=Mus musculus OX=10090 GN=Slc44a2 PE=1 SV=2	18	12	39	12	1	706	80.1	8.79	212	77.08	11	12	0	5972.42	5783.02	4.8	6.81	5627.3	6246.1	6146.6	6207	5635.1	6249.2	6036.6	5835.3	5536	5258	High	High	High	High	High	High	High	High	High	High	High		0		0.968288	0.431773
O55229	Choline/ethanolamine kinase OS=Mus musculus OX=10090 GN=Chkb PE=1 SV=3	5	1	2	1	1	394	45.1	5.41	47	6.24	1	1	0	51.84	56.86	16.55	11.2	40.7	62.1	57	56.5	42.9	49.2	51.7	57.4	62.3	63.7	High	High	High	High	High	High	High	High	High	High	High		0		1.09684	0.380956
Q8BGS7	Choline/ethanolaminephosphotransferase 1 OS=Mus musculus OX=10090 GN=Cept1 PE=1 SV=1	2	1	1	1	1	416	46.4	8.1		0		1	0	#DIV/0!	#DIV/0!													High	High	High	High	High	High	High	High	High	High	High		0		#DIV/0!	#DIV/0!
P49586	Choline-phosphate cytidylyltransferase A OS=Mus musculus OX=10090 GN=Pcyt1a PE=1 SV=1	38	12	27	12	1	367	41.6	7.03	314	55.54	10	12	0	2270.42	2344.02	7.61	4.01	2037.2	2501.7	2382	2322.5	2108.7	2412.7	2447.3	2277.6	2220.4	2362.1	High	High	High	High	High	High	High	High	High	High	High		0		1.03242	0.504963
D3YU39	Cholinephosphotransferase 1 OS=Mus musculus OX=10090 GN=Chpt1 PE=1 SV=1	9	3	6	1	1	406	45.4	7.08		23.82		3	0	153.56	151.86	7.83	6.09	134.2	145.5	166.3	158.6	163.2	151.5	137	152.7	156.1	162	High	High	High	High	High	High	High	High	High	High	High		0		0.988929	0.761993
Q8C025	Cholinephosphotransferase 1 OS=Mus musculus OX=10090 GN=Chpt1 PE=1 SV=1	8	3	16	1	1	398	44.6	7.08	156	32.16	3	3	2	2034.62	2134.76	1.67	6.22	2051	1988.8	2085.6	2025.5	2022.2	2136.6	2217.4	2301.3	2056.1	1962.4	High	High	High	High	High	High	High	High	High	High	High		0		1.04922	0.142717
Q8VHY0	Chondroitin sulfate proteoglycan 4 OS=Mus musculus OX=10090 GN=Cspg4 PE=1 SV=3	18	30	81	30	1	2327	252.2	5.44	687	182.29	29	29	0	4314.4	4646.76	2.7	5.63	4379.8	4319.4	4458.7	4241.3	4172.8	5088.8	4665	4443	4475.7	4561.3	High	High	High	High	High	High	High	High	High	High	High		0		1.07704	0.0473637
Q8VEA6	Chordin-like protein 2 OS=Mus musculus OX=10090 GN=Chrdl2 PE=1 SV=1	1	1	2	1	1	426	47.7	7.65	0	2.75	1	1	0	558.78	586.22	5.74	11.31	554.8	512.2	589.9	596.2	540.8	575.1	676.7	613.8	570.2	495.3	Medium	Medium	Medium	Medium	Medium	Medium	Medium	Medium	Medium	Medium	Medium		0		1.04911	0.496864
Q9DCT6	Chromatin complexes subunit BAP18 OS=Mus musculus OX=10090 GN=Bap18 PE=1 SV=1	12	1	5	1	1	171	18	7.33	0	4.81	1	1	0	228	249.94	6.19	7.2	210.3	240.1	237.4	221.1	231.1	241.3	239.2	241.8	245.5	281.9	High	High	High	High	High	High	High	High	High	High	High		0		1.09623	0.0789241
Q9CY57	Chromatin target of PRMT1 protein OS=Mus musculus OX=10090 GN=Chtop PE=1 SV=2	20	3	7	3	1	249	26.6	12.23	58	17.77	3	3	0	346.72	386.58	9.86	8.09	315.3	320.6	396.1	354.7	346.9	412.1	421	368.7	344.7	386.4	High	High	High	High	High	High	High	High	High	High	High		0		1.11496	0.205306
P83917	Chromobox protein homolog 1 OS=Mus musculus OX=10090 GN=Cbx1 PE=1 SV=1	35	8	35	7	1	185	21.4	4.93	391	77.42	6	8	0	2713.5	2908.68	6.62	13.8	2884.8	2551.1	2940.4	2521.4	2669.8	3256.1	3342.2	2543.2	2459.8	2942.1	High	High	High	High	High	High	High	High	High	High	High		0		1.07193	0.386756
P23198	Chromobox protein homolog 3 OS=Mus musculus OX=10090 GN=Cbx3 PE=1 SV=2	43	9	39	8	1	183	20.8	5.22	389	84.1	8	9	1	4002.2	4198.32	3.26	10.36	4132	4014.7	4114.5	3803.9	3945.9	4471.2	4757.5	3665.2	3907.3	4190.4	High	High	High	High	High	High	High	High	High	High	High		0		1.049	0.36755
Q6PDQ2	Chromodomain-helicase-DNA-binding protein 4 OS=Mus musculus OX=10090 GN=Chd4 PE=1 SV=1	1	1	2	1	1	1915	217.6	5.81	27	3.41	1	1	0	173.96	174.44	8.77	6.81	156.5	193.4	175	187.9	157	185	173.6	164.1	187.9	161.6	High	High	High	High	High	High	High	High	High	High	High		0		1.00276	0.956101
A2AJK6	Chromodomain-helicase-DNA-binding protein 7 OS=Mus musculus OX=10090 GN=Chd7 PE=1 SV=1	1	1	6	1	1	2986	333.9	6.47	0	0	1	1	0	19.7	16.78	15.82	18.67	20	18.3	21.4	16.6	22.2	21.5	13.1	15.1	16.5	17.7	High	High	High	High	High	High	High	High	High	High	High	Oxidation [P2457; P2462]	0		0.851777	0.128332
Q09XV5	Chromodomain-helicase-DNA-binding protein 8 OS=Mus musculus OX=10090 GN=Chd8 PE=1 SV=1	0	1	2	1	1	2582	290.7	6.42	0	1.87	1	1	0	537.76	522.7	9.91	14.15	591.8	475.8	505.9	504.5	610.8	423.3	500.9	578.9	611.1	499.3	Medium	Medium	Medium	Medium	Medium	Medium	Medium	Medium	Medium	Medium	Medium		0		0.971995	0.791884
Q8BYH8	Chromodomain-helicase-DNA-binding protein 9 OS=Mus musculus OX=10090 GN=Chd9 PE=1 SV=2	0	1	1	1	1	2885	323.7	7.5		0		1	0	180.92	223.8	18.87	10	178.5	175.5	226	135	189.6	208.8	203.9	217.5	228.7	260.1	Medium	Medium	Medium	Medium	Medium	Medium	Medium	Medium	Medium	Medium	Medium	Oxidation [P2568]	0		1.23701	0.0738866
P26339	Chromogranin-A OS=Mus musculus OX=10090 GN=Chga PE=1 SV=1	1	1	5	1	1	463	51.8	4.72	0	3.98	1	1	0	455.3	450.66	6.33	4.82	454.6	462.9	496.3	416.1	446.6	443.6	439.9	483.9	427.1	458.8	High	High	High	High	High	High	High	High	High	High	High		0		0.989809	0.540898
P33174	Chromosome-associated kinesin KIF4 OS=Mus musculus OX=10090 GN=Kif4 PE=1 SV=3	2	3	5	2	1	1231	139.4	6.68	42	3.2	2	2	0	295.48	341.8	13.28	15.51	283.8	288.4	355.3	287.2	262.7	322.5	269.2	392.4	395.5	329.4	High	High	High	High	High	High	High	High	High	High	High		0		1.15676	0.0904318
Q8C6E0	Cilia- and flagella-associated protein 36 OS=Mus musculus OX=10090 GN=Cfap36 PE=1 SV=1	15	3	6	3	1	343	39.6	4.93	79	13.91	3	3	0	211.04	220.42	6.5	4.33	186.9	218.9	216.7	216.7	216	204.7	219.5	224.8	223.1	230	High	High	High	High	High	High	High	High	High	High	High		0		1.04445	0.0352536
E9Q5M6	Cilia- and flagella-associated protein 44 OS=Mus musculus OX=10090 GN=Cfap44 PE=2 SV=1	1	2	3	1	1	1843	211.4	5.53	0	4.47	1	2	0	#DIV/0!	#DIV/0!													Medium	Medium	Medium	Medium	Medium	Medium	Medium	Medium	Medium	Medium	Medium		0		#DIV/0!	#DIV/0!
Q9D439	Cilia- and flagella-associated protein 53 OS=Mus musculus OX=10090 GN=Cfap53 PE=2 SV=3	2	2	9	2	1	514	61.9	9.29	0	4.33	1	2	0	2080.52	1984.7	6.83	7.36	2092.1	1984.4	2276.3	2172.7	1877.1	2078.2	2024	2154.7	1846.9	1819.7	High	High	High	High	High	High	High	High	High	High	High		0		0.953944	0.20452
A0A087WRI3	Cilia and flagella-associated protein 77 OS=Mus musculus OX=10090 GN=Cfap77 PE=1 SV=1	2	1	4	1	1	283	32.7	10.07		9.95		1	0	165.94	166.98	17.66	26.22	200.4	125.1	151.1	168	185.1	122.8	155.6	153.6	162.6	240.3	High	High	High	High	High	High	High	High	High	High	High		0		1.00627	0.965184
F6XLV1	Ciliary rootlet coiled-coil, rootletin family member 2 OS=Mus musculus OX=10090 GN=Crocc2 PE=1 SV=2	0	1	1	1	1	1638	186.5	6.13		1.94		1	0	416.08	407.72	4.01	2.31	392.9	418.9	426.9	405.1	436.6	409.5	411.5	395	420	402.6	Medium	Medium	Medium	Medium	Medium	Medium	Medium	Medium	Medium	Medium	Medium		0		0.979908	0.485887
P59242	Cingulin OS=Mus musculus OX=10090 GN=Cgn PE=1 SV=1	1	1	4	1	1	1191	136.4	5.91	28	2.15	1	1	0	1734.02	1782.56	13.77	4.95	1502.4	1419.4	2056.1	1893.8	1798.4	1707.5	1775.7	1879.3	1864.6	1685.7	Medium	Medium	Medium	Medium	Medium	Medium	Medium	Medium	Medium	Medium	Medium		0		1.02799	0.654384
Q6AW69	Cingulin-like protein 1 OS=Mus musculus OX=10090 GN=Cgnl1 PE=1 SV=2	0	1	1	1	1	1298	148.1	5.77		2.46		1	0	987.66	912.26	20.52	15.68	626.3	1196	1046.7	1104.1	965.2	1002.7	1091.9	763.4	928.9	774.4	High	High	High	High	High	High	High	High	High	High	High		0		0.923658	0.552766
Q8R4N0	Citramalyl-CoA lyase, mitochondrial OS=Mus musculus OX=10090 GN=Clybl PE=1 SV=2	66	23	292	23	1	338	37.5	8.54	2745	590.79	23	23	0	34701	35490.6	1.99	2.9	35042.4	34011.4	34684.3	34207.3	35559.7	34288.7	35243.8	37132.1	35517.3	35271	High	High	High	High	High	High	High	High	High	High	High		0		1.02275	0.24602
Q80X68	Citrate synthase OS=Mus musculus OX=10090 GN=Csl PE=1 SV=1	31	13	283	4	1	466	52.3	8.79		1024.1		13	0	7.26	7.86	26.66	13.25	7.6	5.5	9	4.7	9.5	8	9.4	6.5	7.7	7.7	High	High	High	High	High	High	High	High	High	High	High	Oxidation [P87; P99; P343]	0		1.08264	0.660281
Q9CZU6	Citrate synthase, mitochondrial OS=Mus musculus OX=10090 GN=Cs PE=1 SV=1	45	21	1248	12	1	464	51.7	8.57	9554	1954.78	20	21	20	148725	148134	1.36	2.57	145348	148102	149952	150417	149804	150280	149898	152284	144587	143621	High	High	High	High	High	High	High	High	High	High	High	Oxidation [P87; P99; P343]	0		0.99603	0.807972
D3YU89	Citron Rho-interacting kinase OS=Mus musculus OX=10090 GN=Cit PE=1 SV=1	2	3	4	3	1	2070	236.9	6.6		12.36		3	0	1459.58	1573.2	4.35	10.29	1358.3	1514.3	1420.1	1528	1477.2	1610	1339.9	1519.6	1612.3	1784.2	High	High	High	High	High	High	High	High	High	High	High		0		1.07784	0.24668
Q9ESN9	C-Jun-amino-terminal kinase-interacting protein 3 OS=Mus musculus OX=10090 GN=Mapk8ip3 PE=1 SV=1	9	10	23	5	1	1337	147.5	5.45	140	42.41	9	10	0	229.48	256.7	17.56	7.67	184.7	297.4	217.6	241.6	206.1	255.4	247.6	231.6	284.6	264.3	High	High	High	High	High	High	High	High	High	High	High		0		1.11862	0.273349
Q58A65	C-Jun-amino-terminal kinase-interacting protein 4 OS=Mus musculus OX=10090 GN=Spag9 PE=1 SV=2	30	34	86	28	1	1321	146.1	5.15	655	178.71	32	33	4	5836.58	6167.06	8.09	3.24	4978.8	6062	5949.9	6390.7	5801.5	6153.2	5854.8	6200.2	6218.7	6408.4	High	High	High	High	High	High	High	High	High	High	High		0		1.05662	0.270258
Q8CJ61	CKLF-like MARVEL transmembrane domain-containing protein 4 OS=Mus musculus OX=10090 GN=Cmtm4 PE=1 SV=1	4	1	2	1	1	208	22.9	5.59	17	2.59	1	1	0	90.28	89.58	16.42	14.36	80.2	107.2	106.4	77.5	80.1	107.8	83.5	72.8	92.4	91.4	High	High	High	High	High	High	High	High	High	High	High		0		0.992246	0.955659
Q9CZ69	CKLF-like MARVEL transmembrane domain-containing protein 6 OS=Mus musculus OX=10090 GN=Cmtm6 PE=1 SV=1	9	2	6	2	1	183	19.8	6.29	79	9.46	2	2	0	549.64	584.56	5.76	5.65	528.7	561.4	579.3	575.5	503.3	585	634.7	550.5	592.9	559.7	High	High	High	High	High	High	High	High	High	High	High		0		1.06353	0.130302
Q9ESD6	CKLF-like MARVEL transmembrane domain-containing protein 7 OS=Mus musculus OX=10090 GN=Cmtm7 PE=1 SV=1	13	1	2	1	1	167	18.1	7.74	37	4.55	1	1	0	#DIV/0!	#DIV/0!													High	High	High	High	High	High	High	High	High	High	High		0		#DIV/0!	#DIV/0!
Q68FD5	Clathrin heavy chain 1 OS=Mus musculus OX=10090 GN=Cltc PE=1 SV=3	48	69	339	69	1	1675	191.4	5.69	3665	784.38	66	69	0	22771.1	23974.8	19.42	9.06	16470.8	27904.3	21929.3	27564.5	19986.8	22745.1	21708.2	22923.6	26879.2	25618	High	High	High	High	High	High	High	High	High	High	High	Oxidation [P593; P813]	2	Oxidation [P593; P813]	1.05286	0.625018
Q5SUH6	Clathrin interactor 1 OS=Mus musculus OX=10090 GN=Clint1 PE=1 SV=1	20	12	17	12	1	641	69.7	6.65		67.18		12	0	2374.84	2315.02	6.05	4.32	2178.1	2391.6	2378.9	2609.4	2316.2	2403.3	2285.5	2157.4	2392.1	2336.8	High	High	High	High	High	High	High	High	High	High	High		0		0.974811	0.515241
O08585	Clathrin light chain A OS=Mus musculus OX=10090 GN=Clta PE=1 SV=2	32	10	49	1	1	235	25.6	4.58	199	73.77	9	10	9	6699.9	7013.62	4.31	6.44	7080.1	6442.8	7002.5	6564.3	6409.8	7609.9	7227	6382.2	6948.8	6900.2	High	High	High	High	High	High	High	High	High	High	High		0		1.04682	0.265512
Q6PFA2	Clathrin light chain OS=Mus musculus OX=10090 GN=Clta PE=1 SV=1	41	10	30	1	1	218	23.6	4.5		96.3		10	0	259.94	258.78	4.11	7.14	269.4	265.9	241.9	254.4	268.1	268.1	263.9	229.9	253.4	278.6	High	High	High	High	High	High	High	High	High	High	High		0		0.995537	0.761211
Q9CQX5	Claudin domain-containing protein 1 OS=Mus musculus OX=10090 GN=Cldnd1 PE=1 SV=1	4	1	2	1	1	253	28.6	6.1	0	3.34	1	1	0	#DIV/0!	#DIV/0!													High	High	High	High	High	High	High	High	High	High	High		0		#DIV/0!	#DIV/0!
Q9CQF3	Cleavage and polyadenylation specificity factor subunit 5 OS=Mus musculus OX=10090 GN=Nudt21 PE=1 SV=1	11	2	4	2	1	227	26.2	8.82	0	5.84	2	2	0	#DIV/0!	#DIV/0!													High	High	High	High	High	High	High	High	High	High	High		0		#DIV/0!	#DIV/0!
Q6NVF9	Cleavage and polyadenylation specificity factor subunit 6 OS=Mus musculus OX=10090 GN=Cpsf6 PE=1 SV=1	3	1	2	1	1	551	59.1	7.15	36	5.15	1	1	0	44.58	49.04	11.09	9.93	52.2	39.2	46.4	39.1	46	46.2	43.9	47	55.7	52.4	High	High	High	High	High	High	High	High	High	High	High		0		1.10004	0.295777
Q99LC2	Cleavage stimulation factor subunit 1 OS=Mus musculus OX=10090 GN=Cstf1 PE=1 SV=1	4	1	4	1	1	431	48.4	6.58	87	10.48	1	1	0	68.9	77.42	13.15	6.41	81.3	70.3	74.4	63.4	55.1	77	72.9	73.9	85.6	77.7	High	High	High	High	High	High	High	High	High	High	High		0		1.12366	0.213913
Q8BIQ5	Cleavage stimulation factor subunit 2 OS=Mus musculus OX=10090 GN=Cstf2 PE=1 SV=2	13	5	16	2	1	580	61.3	6.83	167	30.08	4	5	0	148.3	169.16	5.1	8.94	149.9	144.9	161.6	144.7	140.4	183.2	178.6	152.6	152.9	178.5	High	High	High	High	High	High	High	High	High	High	High		0		1.14066	0.0844428
Q8C7E9	Cleavage stimulation factor subunit 2 tau variant OS=Mus musculus OX=10090 GN=Cstf2t PE=1 SV=2	12	5	15	2	1	632	65.8	7.25	113	26.33	5	5	2	979.66	953.2	3.21	2.96	953.8	938.4	1012.5	1016	977.6	980.9	982.5	951.6	922.3	928.7	High	High	High	High	High	High	High	High	High	High	High		0		0.972991	0.374752
Q99LI7	Cleavage stimulation factor subunit 3 OS=Mus musculus OX=10090 GN=Cstf3 PE=1 SV=1	3	1	2	1	1	717	82.8	8.12	26	4.61	1	1	0	30.4	33.94	12.24	12.75	24.7	29.4	35.9	29.6	32.4	35.1	26.9	33.3	38.4	36	High	High	High	High	High	High	High	High	High	High	High		0		1.11645	0.26428
Q8VBZ3	Cleft lip and palate transmembrane protein 1 homolog OS=Mus musculus OX=10090 GN=Clptm1 PE=1 SV=1	30	11	47	11	1	664	75.2	6.3	845	125.37	11	10	0	2793.06	2915.94	3.58	3.02	2650.1	2764.6	2902.9	2884.1	2763.6	3000.3	2926.4	2791	2993	2869	High	High	High	High	High	High	High	High	High	High	High		0		1.04399	0.171055
Q80TV8	CLIP-associating protein 1 OS=Mus musculus OX=10090 GN=Clasp1 PE=1 SV=2	10	13	28	11	1	1535	169.1	9.03	281	50.27	12	13	2	1990.98	2004.18	16.09	9.02	1617.7	2414.3	1889.3	2316.9	1716.7	1964.7	1825.9	1867.7	2270.7	2091.9	High	High	High	High	High	High	High	High	High	High	High		0		1.00663	0.94334
Q8BRT1	CLIP-associating protein 2 OS=Mus musculus OX=10090 GN=Clasp2 PE=1 SV=1	3	3	6	1	1	1286	140.7	8.63	78	11.36	3	3	0	#DIV/0!	#DIV/0!													High	High	High	High	High	High	High	High	High	High	High		0		#DIV/0!	#DIV/0!
A0A0R4J140	Clustered mitochondria protein homolog OS=Mus musculus OX=10090 GN=Cluh PE=1 SV=1	49	50	120	50	1	1353	151.7	6.02		514.27		50	0	17035.1	17076.1	4.53	4.12	15965.5	18160.5	17211.6	17424.9	16413.1	17660.2	17044.4	15880.4	17349.3	17446.4	High	High	High	High	High	High	High	High	High	High	High		0		1.00241	0.947881
Q06890	Clusterin OS=Mus musculus OX=10090 GN=Clu PE=1 SV=1	30	14	61	14	1	448	51.6	5.67	570	123.67	13	14	0	4810.7	4999.24	5.02	13.31	5107.9	4511	4978.9	4818.8	4636.9	4648.6	4375.6	4856.2	6112.4	5003.4	High	High	High	High	High	High	High	High	High	High	High		0		1.03919	0.571293
Q1ERP8	CMRF35-like molecule 9 OS=Mus musculus OX=10090 GN=Cd300lg PE=1 SV=1	23	6	25	6	1	331	36.7	5.85	507	64.69	6	6	0	1740.34	1738.86	2.25	4.48	1725.8	1733.7	1747.7	1700.2	1794.3	1740.7	1648.7	1705.3	1861.6	1738	High	High	High	High	High	High	High	High	High	High	High		0		0.99915	0.974691
Q9EQS3	c-Myc-binding protein OS=Mus musculus OX=10090 GN=Mycbp PE=1 SV=5	72	6	23	6	1	103	12	5.91	118	54.42	6	6	0	2024.04	2095.02	1.35	6.33	2037.6	2021.9	2065.1	2005.3	1990.3	2218.1	2112.2	1950	1967.3	2227.5	High	High	High	High	High	High	High	High	High	High	High		0		1.03507	0.341188
Q9CQI6	Coactosin-like protein OS=Mus musculus OX=10090 GN=Cotl1 PE=1 SV=3	55	8	23	8	1	142	15.9	5.4	210	40.51	7	8	0	2575.88	2732.76	5.28	8.11	2598.7	2695.9	2617.1	2635.8	2331.9	2972.2	2756.1	2377	2840.8	2717.7	High	High	High	High	High	High	High	High	High	High	High		0		1.0609	0.24725
Q8BH61	Coagulation factor XIII A chain OS=Mus musculus OX=10090 GN=F13a1 PE=1 SV=3	22	15	50	15	1	732	83.2	5.92	431	97.96	13	15	0	3492.56	3619.08	2.06	6.28	3460.4	3442.5	3464.4	3608	3487.5	3582.2	3848	3253	3750.8	3661.4	High	High	High	High	High	High	High	High	High	High	High		0		1.03623	0.268852
Q8CIE6	Coatomer subunit alpha OS=Mus musculus OX=10090 GN=Copa PE=1 SV=2	29	31	73	31	1	1224	138.3	7.65	481	140.47	29	31	0	5475.74	5250.52	12.35	7.61	4568.1	6284	5375.1	6185.5	4966	5250.2	4743.8	5136.8	5858	5263.8	High	High	High	High	High	High	High	High	High	High	High		0		0.958869	0.582032
Q9JIF7	Coatomer subunit beta OS=Mus musculus OX=10090 GN=Copb1 PE=1 SV=1	24	18	46	18	1	953	107	6	375	106.89	17	18	0	3071.48	2909.62	19.19	11.06	2360.9	3748.5	3010.8	3695	2542.2	3011.8	2489.8	2731.7	3348.1	2966.7	High	High	High	High	High	High	High	High	High	High	High		0		0.947302	0.654998
O55029	Coatomer subunit beta' OS=Mus musculus OX=10090 GN=Copb2 PE=1 SV=2	29	24	62	24	1	905	102.4	5.3	421	117.47	21	24	0	4267	4330.72	8.41	3.42	3825.3	4736.8	4355.7	4509	3908.2	4398.2	4182.3	4184.4	4527.7	4361	High	High	High	High	High	High	High	High	High	High	High		0		1.01493	0.772699
Q5XJY5	Coatomer subunit delta OS=Mus musculus OX=10090 GN=Arcn1 PE=1 SV=2	27	14	38	14	1	511	57.2	6.21	204	72.82	12	14	0	2507.48	2399.3	10.44	6.08	2094.3	2715.7	2329.5	2736.4	2661.5	2348.1	2199.1	2463	2595.1	2391.2	High	High	High	High	High	High	High	High	High	High	High		0		0.956857	0.478386
O89079	Coatomer subunit epsilon OS=Mus musculus OX=10090 GN=Cope PE=1 SV=3	26	6	12	6	1	308	34.5	5.06	131	21.88	6	5	0	430.22	406.56	14.63	6.75	357.7	511.7	400.7	488	393	427.7	371.9	410.1	437	386.1	High	High	High	High	High	High	High	High	High	High	High		0		0.945005	0.535175
Q9QZE5	Coatomer subunit gamma-1 OS=Mus musculus OX=10090 GN=Copg1 PE=1 SV=1	16	13	27	10	1	874	97.5	5.35	192	52.61	10	13	3	1872.12	1717.5	13.3	12.02	1755.7	2191.3	1780.8	2081.4	1551.4	1709.8	1415.6	1802.8	1982.9	1676.4	High	High	High	High	High	High	High	High	High	High	High		0		0.917409	0.38778
Q9QXK3	Coatomer subunit gamma-2 OS=Mus musculus OX=10090 GN=Copg2 PE=1 SV=1	14	12	25	9	1	871	97.6	5.8	151	44.9	12	12	0	994.92	927.64	14.92	11.47	802.3	1175.7	972.7	1151.9	872	886.8	800.3	907.5	1090	953.6	High	High	High	High	High	High	High	High	High	High	High		0		0.932376	0.46664
P61924	Coatomer subunit zeta-1 OS=Mus musculus OX=10090 GN=Copz1 PE=1 SV=1	32	4	15	4	1	177	20.2	4.81	232	39.68	4	4	0	1165.38	1193.54	8.51	7.84	1027.1	1251.4	1191.6	1278.8	1078	1300.8	1078.2	1145.2	1277.9	1165.6	High	High	High	High	High	High	High	High	High	High	High		0		1.02416	0.724371
Q9JHH9	Coatomer subunit zeta-2 OS=Mus musculus OX=10090 GN=Copz2 PE=1 SV=1	14	2	8	2	1	205	22.9	5.17	86	20.28	2	2	0	311.22	310.32	11.02	3.03	286.2	365.9	323.1	306.6	274.3	310	299.2	303.4	321.9	317.1	High	High	High	High	High	High	High	High	High	High	High		0		0.997108	0.965078
Q8VEH6	COBW domain-containing protein 1 OS=Mus musculus OX=10090 GN=Cbwd1 PE=1 SV=1	14	4	8	4	1	393	43.7	4.89	111	16.04	4	4	0	517.86	513.64	4.24	1.74	516	523.9	543.5	498.2	507.7	526.9	503.9	517.2	512.5	507.7	High	High	High	High	High	High	High	High	High	High	High		0		0.991851	0.631612
E9Q3H6	Coenzyme Q10A OS=Mus musculus OX=10090 GN=Coq10a PE=1 SV=1	31	9	29	9	1	259	28.9	9.82		91.76		9	0	4327.82	3952.8	9.93	11.34	3751.2	4694.8	3928.6	4777.5	4487	3595.3	3664.5	4075.2	4683.7	3745.3	High	High	High	High	High	High	High	High	High	High	High		0		0.913347	0.162626
P18760	Cofilin-1 OS=Mus musculus OX=10090 GN=Cfl1 PE=1 SV=3	83	17	172	14	1	166	18.5	8.09	1141	364.78	15	17	0	19416.1	20720.4	3.27	4.13	20268.6	18438.8	19603.7	19339.4	19429.8	21733.8	21348.1	19875.8	19830.4	20813.9	High	High	High	High	High	High	High	High	High	High	High	Oxidation [P67; P106; P110]	0		1.06718	0.0487332
P45591	Cofilin-2 OS=Mus musculus OX=10090 GN=Cfl2 PE=1 SV=1	83	18	165	15	1	166	18.7	7.88	879	343.15	16	18	5	24339.8	25391	4.1	2.06	25764.5	23648.5	24735.8	22948.3	24602.1	25766.5	24628.1	25352.5	25230.7	25977.2	High	High	High	High	High	High	High	High	High	High	High	Oxidation [P67; P106; P110]	3	Oxidation [P67; P106; P110]	1.04319	0.0512094
Q8K2I2	Coiled-coil alpha-helical rod protein 1 OS=Mus musculus OX=10090 GN=Cchcr1 PE=2 SV=3	2	3	9	2	1	770	87.1	5.96	0	11.11	1	3	0	626.44	644.86	5.34	5.18	596.9	644.6	623.7	679.6	587.4	694.7	657.5	631.4	605.4	635.3	High	High	High	High	High	High	High	High	High	High	High		0		1.0294	0.549147
Q8BRN9	Coiled-coil and C2 domain-containing protein 1B OS=Mus musculus OX=10090 GN=Cc2d1b PE=1 SV=1	4	3	7	3	1	848	93	5.41	43	13.59	2	3	0	138.76	132.68	5.99	3.76	130.1	127.9	143.9	142.6	149.3	138	130.1	127.9	129.2	138.2	High	High	High	High	High	High	High	High	High	High	High		0		0.956183	0.265162
E9Q8Q6	Coiled-coil domain-containing 141 OS=Mus musculus OX=10090 GN=Ccdc141 PE=1 SV=2	5	5	5	5	1	1531	173.5	5.88		21.83		5	0	417.96	427.8	4.76	5.73	390.8	450.4	425.7	412.8	410.1	426.4	467.2	401.4	415.3	428.7	High	High	High	High	High	High	High	High	High	High	High		0		1.02354	0.3817
E9Q9F7	Coiled-coil domain-containing 146 OS=Mus musculus OX=10090 GN=Ccdc146 PE=1 SV=1	1	1	1	1	1	977	115	6.84		2.13		1	0	591.64	583.14	5.09	4.54	616.2	573.9	561.9	628.5	577.7	552	608.4	559	607.1	589.2	High	High	High	High	High	High	High	High	High	High	High		0		0.985633	0.636718
S4R181	Coiled-coil domain-containing 166 OS=Mus musculus OX=10090 GN=Ccdc166 PE=4 SV=1	3	1	1	1	1	449	51.1	9.67		0		1	0	#DIV/0!	#DIV/0!													High	High	High	High	High	High	High	High	High	High	High	Oxidation [P302; P306]	2	Oxidation [P302; P306]	#DIV/0!	#DIV/0!
E9Q4T4	Coiled-coil domain-containing 71-like OS=Mus musculus OX=10090 GN=Ccdc71l PE=1 SV=1	7	1	1	1	1	218	24.2	11.52		2.17		1	0	189.44	183.22	6.76	4.85	184.8	189.9	176.1	199.4	197	171.7	185.6	196.2	181.3	181.3	Medium	Medium	Medium	Medium	Medium	Medium	Medium	Medium	Medium	Medium	Medium		0		0.967166	0.423303
A0A1L1SS82	Coiled-coil domain-containing 7A OS=Mus musculus OX=10090 GN=Ccdc7a PE=4 SV=1	1	1	4	1	1	1642	184.8	9.13		6.94		1	0	1368.24	1420.16	14.44	15.42	1684.5	1449.1	1219.1	1279.6	1208.9	1421	1592.8	1242.1	1167.2	1677.7	High	High	High	High	High	High	High	High	High	High	High		0		1.03795	0.697856
Q9D9P2	Coiled-coil domain-containing protein 103 OS=Mus musculus OX=10090 GN=Ccdc103 PE=1 SV=1	5	1	1	1	1	237	26.8	7.24	0		1		0	#DIV/0!	#DIV/0!													High	High	High	High	High	High	High	High	High	High	High		0		#DIV/0!	#DIV/0!
Q8VE99	Coiled-coil domain-containing protein 115 OS=Mus musculus OX=10090 GN=Ccdc115 PE=1 SV=1	3	1	1	1	1	180	19.7	8.81	0		1		0	122.66	124.34	8.83	6.13	109	135.8	115.7	122.6	130.2	131.6	120.3	117.3	119	133.5	High	High	High	High	High	High	High	High	High	High	High		0		1.0137	0.799127
Q8R344	Coiled-coil domain-containing protein 12 OS=Mus musculus OX=10090 GN=Ccdc12 PE=1 SV=2	22	3	5	3	1	166	18.9	7.21	0	7.59	2	3	0	478.02	501.46	2.93	10.21	492.2	460.6	482	487.6	467.7	522.3	499	425.2	494.7	566.1	High	High	High	High	High	High	High	High	High	High	High		0		1.04904	0.403112
Q9D8X2	Coiled-coil domain-containing protein 124 OS=Mus musculus OX=10090 GN=Ccdc124 PE=1 SV=1	29	6	13	6	1	217	25.3	9.64	75	21.2	6	5	0	656.82	725.68	3.39	15.26	642.6	627.3	657	686.2	671	833.5	805.9	710.3	550.4	728.3	High	High	High	High	High	High	High	High	High	High	High		0		1.10484	0.306715
Q3TC33	Coiled-coil domain-containing protein 127 OS=Mus musculus OX=10090 GN=Ccdc127 PE=1 SV=2	24	7	25	7	1	260	30.5	9.13	188	40.82	6	7	0	3510.64	3456.38	5.56	8.91	3199.9	3430	3486.8	3738.2	3698.3	3021	3377.3	3485.4	3879.6	3518.6	High	High	High	High	High	High	High	High	High	High	High		0		0.984544	0.417992
Q8C7V8	Coiled-coil domain-containing protein 134 OS=Mus musculus OX=10090 GN=Ccdc134 PE=1 SV=1	8	1	1	1	1	229	26.5	8.53		3.62		1	0	#DIV/0!	#DIV/0!													High	High	High	High	High	High	High	High	High	High	High		0		#DIV/0!	#DIV/0!
Q3TVA9	Coiled-coil domain-containing protein 136 OS=Mus musculus OX=10090 GN=Ccdc136 PE=1 SV=2	1	1	2	1	1	1136	131.8	4.84	0		1		0	#DIV/0!	#DIV/0!													High	High	High	High	High	High	High	High	High	High	High		0		#DIV/0!	#DIV/0!
Q8BSN3	Coiled-coil domain-containing protein 151 OS=Mus musculus OX=10090 GN=Ccdc151 PE=2 SV=1	1	1	1	1	1	593	69.7	8.66	22		1		0	#DIV/0!	#DIV/0!													High	High	High	High	High	High	High	High	High	High	High		0		#DIV/0!	#DIV/0!
Q9D162	Coiled-coil domain-containing protein 167 OS=Mus musculus OX=10090 GN=Ccdc167 PE=1 SV=2	24	2	4	2	1	97	11.5	9.39	27	6.8	2	2	0	436.64	455.02	8.49	3.93	387.3	401	478.8	449.7	466.4	429.8	448.5	468.8	452.8	475.2	High	High	High	High	High	High	High	High	High	High	High		0		1.04209	0.179606
Q8CE13	Coiled-coil domain-containing protein 17 OS=Mus musculus OX=10090 GN=Ccdc17 PE=2 SV=1	3	1	2	1	1	565	62.5	8.28	0	3.32	1	1	0	875.94	797.36	3.56	6.13	861.6	838	859.8	909.2	911.1	785	834.1	778.3	856.7	732.7	High	High	High	High	High	High	High	High	High	High	High	Oxidation [P169]	1	Oxidation [P169]	0.910291	0.0509463
A2AJB1	Coiled-coil domain-containing protein 183 OS=Mus musculus OX=10090 GN=Ccdc183 PE=2 SV=1	3	2	3	2	1	534	62.1	9.25	27	2.44	2	1	0	145.02	153.2	4.1	5.64	140.3	152.6	149	137.4	145.8	151.9	145.9	145.8	155.7	166.7	High	High	High	High	High	High	High	High	High	High	High		0		1.05641	0.217774
A0A2I3BPI0	Coiled-coil domain-containing protein 187 OS=Mus musculus OX=10090 GN=Ccdc187 PE=1 SV=1	0	1	1	1	1	2202	239.3	6.61		0		1	0	#DIV/0!	#DIV/0!													Medium	Medium	Medium	Medium	Medium	Medium	Medium	Medium	Medium	Medium	Medium		0		#DIV/0!	#DIV/0!
Q9JIG7	Coiled-coil domain-containing protein 22 OS=Mus musculus OX=10090 GN=Ccdc22 PE=1 SV=1	12	6	11	6	1	627	70.8	6.01	140	22.86	5	6	0	494.74	503.3	6.94	7.18	430.9	526.4	496.8	518.3	501.3	501	461.8	474.8	533.5	545.4	High	High	High	High	High	High	High	High	High	High	High		0		1.0173	0.737851
Q78PG9	Coiled-coil domain-containing protein 25 OS=Mus musculus OX=10090 GN=Ccdc25 PE=1 SV=1	9	2	4	2	1	208	24.5	6.95	35	6.7	2	2	0	314.08	324.2	13	7.14	243.2	352	313.9	355.7	305.6	305.3	296.2	328.3	351.6	339.6	High	High	High	High	High	High	High	High	High	High	High		0		1.03222	0.636137
Q8CDN8	Coiled-coil domain-containing protein 38 OS=Mus musculus OX=10090 GN=Ccdc38 PE=2 SV=1	1	1	2	1	1	563	65.8	8.91	0	2.37	1	1	0	263.08	270.2	4.34	2.78	270.7	249.7	266.8	250.2	278	259.7	266	275.9	271.3	278.1	Medium	Medium	Medium	Medium	Medium	Medium	Medium	Medium	Medium	Medium	Medium		0		1.02706	0.283325
Q9D5Y1	Coiled-coil domain-containing protein 39 OS=Mus musculus OX=10090 GN=Ccdc39 PE=1 SV=1	1	1	1	1	1	937	110	6.6		2.4		1	0	#DIV/0!	#DIV/0!													High	High	High	High	High	High	High	High	High	High	High		0		#DIV/0!	#DIV/0!
Q5SV66	Coiled-coil domain-containing protein 42 OS=Mus musculus OX=10090 GN=Ccdc42 PE=2 SV=2	2	1	5	1	1	316	38	8.18	56	3.22	1	1	0	587.72	554.34	6.02	3.85	614.5	550.4	600.8	559.2	613.7	530.8	536.5	582.1	567.7	554.6	High	High	High	High	High	High	High	High	High	High	High		0		0.943204	0.115436
Q9CR29	Coiled-coil domain-containing protein 43 OS=Mus musculus OX=10090 GN=Ccdc43 PE=1 SV=1	9	2	4	2	1	222	25	4.97	40	6.16	2	2	0	348.24	376.4	6.73	6.28	389.4	333.4	354.2	343.3	320.9	384.5	367.2	409.6	345.1	375.6	High	High	High	High	High	High	High	High	High	High	High		0		1.08086	0.0922785
Q9D024	Coiled-coil domain-containing protein 47 OS=Mus musculus OX=10090 GN=Ccdc47 PE=1 SV=2	17	10	27	10	1	483	55.8	4.84	149	51.74	10	10	0	3319.9	3514.74	4.04	6.21	3092.2	3323	3380.7	3494	3309.6	3683.7	3762.1	3384.1	3225.6	3518.2	High	High	High	High	High	High	High	High	High	High	High		0		1.05869	0.271934
Q3URS9	Coiled-coil domain-containing protein 51 OS=Mus musculus OX=10090 GN=Ccdc51 PE=1 SV=1	37	14	41	14	1	406	45.1	8.09	331	71.36	14	14	0	4049.14	4136.46	2.64	3.18	3960	3961.6	3991.8	4239.1	4093.2	4230.2	4259.4	4068.2	3940.7	4183.8	High	High	High	High	High	High	High	High	High	High	High		0		1.02157	0.458141
Q8R3Q6	Coiled-coil domain-containing protein 58 OS=Mus musculus OX=10090 GN=Ccdc58 PE=1 SV=1	48	7	36	7	1	144	16.7	8.16	351	72.75	7	7	0	4128.64	4345.58	2.58	5.32	4128.8	4068.2	4314	4056.4	4075.8	4466.5	4576	4197.4	4016.1	4471.9	High	High	High	High	High	High	High	High	High	High	High		0		1.05255	0.155713
D3YZP9	Coiled-coil domain-containing protein 6 OS=Mus musculus OX=10090 GN=Ccdc6 PE=1 SV=1	14	6	10	6	1	469	52.9	7.34	52	19.33	4	6	0	192.92	196.2	6.49	6.34	174.5	197.5	204.1	206.1	182.4	187.4	186.2	189.5	202.9	215	High	High	High	High	High	High	High	High	High	High	High		0		1.017	0.726391
Q3UJV1	Coiled-coil domain-containing protein 61 OS=Mus musculus OX=10090 GN=Ccdc61 PE=1 SV=1	2	1	1	1	1	511	57.3	10.49		1.96		1	0	136.36	121.18	8.07	9.64	142.4	127.5	138.7	143.9	129.3	121.4	113.4	136.8	127.4	106.9	High	High	High	High	High	High	High	High	High	High	High		0		0.888677	0.0140521
Q8CDV6	Coiled-coil domain-containing protein 63 OS=Mus musculus OX=10090 GN=Ccdc63 PE=2 SV=2	3	2	3	1	1	558	65.2	9.04	0	0	1	1	0	#DIV/0!	#DIV/0!													High	High	High	High	High	High	High	High	High	High	High		0		#DIV/0!	#DIV/0!
Q9D9B0	Coiled-coil domain-containing protein 70 OS=Mus musculus OX=10090 GN=Ccdc70 PE=2 SV=1	3	1	1	1	1	223	27.6	5.33		1.85		1	0	#DIV/0!	#DIV/0!													Medium	Medium	Medium	Medium	Medium	Medium	Medium	Medium	Medium	Medium	Medium		0		#DIV/0!	#DIV/0!
D3YZV8	Coiled-coil domain-containing protein 8 homolog OS=Mus musculus OX=10090 GN=Ccdc8 PE=1 SV=2	1	1	6	1	1	685	73.9	9.09	37		1		0	1644.5	1466.9	27.71	45.11	2212.5	1152.6	1399.3	1303.3	2154.8	840	1003.3	1868.1	2421.9	1201.2	High	High	High	High	High	High	High	High	High	High	High		0		0.892004	0.715808
Q6PG04	Coiled-coil domain-containing protein 82 OS=Mus musculus OX=10090 GN=Ccdc82 PE=2 SV=1	1	1	4	1	1	518	61	5.43	37	5.9	1	1	0	867.88	821.66	9.65	11.59	912.2	988.6	875.9	820.6	742.1	779.1	754.3	726.9	921.4	926.6	High	High	High	High	High	High	High	High	High	High	High		0		0.946744	0.594857
Q8VC31	Coiled-coil domain-containing protein 9 OS=Mus musculus OX=10090 GN=Ccdc9 PE=1 SV=1	3	2	4	2	1	543	61.4	5	38	3.55	2	2	0	165.08	169.68	7.35	19.16	179.4	161.9	178.9	152.3	152.9	195.5	210	145.1	133.5	164.3	High	High	High	High	High	High	High	High	High	High	High		0		1.02787	0.763889
Q8C3X2	Coiled-coil domain-containing protein 90B, mitochondrial OS=Mus musculus OX=10090 GN=Ccdc90b PE=1 SV=1	63	17	87	15	1	256	29.6	8.53	530	173.91	16	17	0	7066.46	6931.2	3.88	1.83	7378.7	6978.9	7133.9	6590.4	7250.4	6783.7	6879	7105	7012.9	6875.4	High	High	High	High	High	High	High	High	High	High	High		0		0.980859	0.475892
Q9D8L5	Coiled-coil domain-containing protein 91 OS=Mus musculus OX=10090 GN=Ccdc91 PE=1 SV=2	2	1	2	1	1	442	50	5.07	0	2.4	1	1	0	102.24	108.7	5.09	5.94	101.7	100.9	107.3	100.9	100.4	113.5	101.8	106.8	117.2	104.2	High	High	High	High	High	High	High	High	High	High	High		0		1.06318	0.118091
Q7TQK5	Coiled-coil domain-containing protein 93 OS=Mus musculus OX=10090 GN=Ccdc93 PE=1 SV=1	5	2	4	2	1	629	72.6	8.29	53	9.56	2	2	0	#DIV/0!	#DIV/0!													High	High	High	High	High	High	High	High	High	High	High		0		#DIV/0!	#DIV/0!
Q7TNL9	Coiled-coil-helix-coiled-coil-helix domain-containing 10 OS=Mus musculus OX=10090 GN=Chchd10 PE=1 SV=1	23	2	8	2	1	138	13.8	8.22		47.15		2	0	1343.46	1724.44	2.32	10.31	1373.7	1325.4	1355.5	1303.3	1359.4	1936.6	1830.5	1545.1	1535.7	1774.3	High	High	High	High	High	High	High	High	High	High	High		0		1.28358	0.00662446
Q9CQA6	Coiled-coil-helix-coiled-coil-helix domain-containing protein 1 OS=Mus musculus OX=10090 GN=Chchd1 PE=1 SV=1	9	1	1	1	1	118	13.6	10.15		0		1	0	#DIV/0!	#DIV/0!													High	High	High	High	High	High	High	High	High	High	High		0		#DIV/0!	#DIV/0!
Q9D1L0	Coiled-coil-helix-coiled-coil-helix domain-containing protein 2 OS=Mus musculus OX=10090 GN=Chchd2 PE=2 SV=1	35	5	65	5	1	153	15.7	9.66	956	155.55	5	4	0	6038.16	6521.32	1.67	10.12	5945.8	6099.4	6196.7	5923.5	6025.4	7362.4	6942.4	5931.9	5807.9	6562	High	High	High	High	High	High	High	High	High	High	High	Oxidation [P30; P34]	2	Oxidation [P30; P34]	1.08002	0.194063
Q9CQP3	Coiled-coil-helix-coiled-coil-helix domain-containing protein 5 OS=Mus musculus OX=10090 GN=Chchd5 PE=1 SV=1	46	3	14	3	1	110	12.3	7.31	217	34.51	3	3	0	451.42	450.44	3.4	5.23	445.1	457.2	459.6	449	446.2	483.5	456.8	424.4	456.3	431.2	High	High	High	High	High	High	High	High	High	High	High		0		0.997829	0.93994
Q8K2Q5	Coiled-coil-helix-coiled-coil-helix domain-containing protein 7 OS=Mus musculus OX=10090 GN=Chchd7 PE=1 SV=1	60	6	36	6	1	85	10.1	8.51	382	80.39	6	6	0	2071.2	2103.1	2.31	1.24	2017.1	2044.8	2151.5	2089.2	2053.4	2130	2085.7	2129	2071.4	2099.4	High	High	High	High	High	High	High	High	High	High	High		0		1.0154	0.267241
Q63ZW6	Col4a5 protein OS=Mus musculus OX=10090 GN=Col4a5 PE=1 SV=1	2	3	5	1	1	1691	161.7	8.1		16.05		3	0	#DIV/0!	#DIV/0!													High	High	High	High	High	High	High	High	High	High	High		0		#DIV/0!	#DIV/0!
Q91YQ3	Cold shock domain-containing protein C2 OS=Mus musculus OX=10090 GN=Csdc2 PE=1 SV=2	6	1	2	1	1	154	16.8	7.55	34	2.83	1	1	0	148.38	138.96	10.04	9.22	149	133.1	165.5	144.7	149.6	150.7	129.7	128.3	155	131.1	High	High	High	High	High	High	High	High	High	High	High		0		0.936514	0.323632
Q91W50	Cold shock domain-containing protein E1 OS=Mus musculus OX=10090 GN=Csde1 PE=1 SV=1	41	29	75	29	1	798	88.7	6.37	652	152.21	27	29	0	5756.82	5887.6	4.44	4.73	6003.5	5369.9	6063.7	5701.8	5645.2	6254.5	6089.2	5782.3	5564.8	5747.2	High	High	High	High	High	High	High	High	High	High	High		0		1.02272	0.493325
P60824	Cold-inducible RNA-binding protein OS=Mus musculus OX=10090 GN=Cirbp PE=1 SV=1	8	1	2	1	1	172	18.6	9.61	0	3.81	1	1	0	69.72	85.3	5.29	9.47	71.8	65	68.4	68.1	75.3	85.5	81.5	77.4	98.8	83.3	High	High	High	High	High	High	High	High	High	High	High		0		1.22347	0.0188763
P11087	Collagen alpha-1(I) chain OS=Mus musculus OX=10090 GN=Col1a1 PE=1 SV=4	5	7	20	7	1	1453	137.9	5.85	108	29.98	7	7	0	1055.02	1006.1	32.6	11.61	1701.3	900.7	1112.3	774.2	786.6	1158.9	1031.6	832.7	987.7	1019.6	High	High	High	High	High	High	High	High	High	High	High	Oxidation [P512; P518; P524; P581; P680; P746; P818]	0		0.953631	0.767359
P28481	Collagen alpha-1(II) chain OS=Mus musculus OX=10090 GN=Col2a1 PE=1 SV=2	1	1	4	1	1	1487	141.9	6.92	0	0	1	1	0	285.26	259.16	9.02	11.16	259.8	254.7	296.3	325	290.5	224.4	260	280.2	294	237.2	Medium	Medium	Medium	Medium	Medium	Medium	Medium	Medium	Medium	Medium	Medium		0		0.908505	0.0568283
P08121	Collagen alpha-1(III) chain OS=Mus musculus OX=10090 GN=Col3a1 PE=1 SV=4	23	23	55	23	1	1464	138.9	6.52	483	94.66	22	21	0	1943.96	1811.86	31.59	8.71	3117.3	1680.5	1947.2	1455.6	1519.2	1938.2	1875.7	1550.5	1781.7	1913.2	High	High	High	High	High	High	High	High	High	High	High	Oxidation [P310; P313; P358; P364; P415; P417; P424; P433; P454; P457; P469; P472; P478; P529; P532; P589; P619; P667; P670; P684; P685; P691; P700; P708; P715; P721; P727; P733; P736; P769; P771; P775; P849; P852; P865; P868; P874; P880; P882; P883; P894; P898; P906; P913; P916; P928; P1075; P1084]	0		0.932046	0.67914
P02463	Collagen alpha-1(IV) chain OS=Mus musculus OX=10090 GN=Col4a1 PE=1 SV=4	7	8	19	6	1	1669	160.6	8.24	195	30.07	7	6	1	848.08	841.66	4.52	5.74	900.6	844.6	875.8	796.7	822.7	827.9	826.1	788.9	845.6	919.8	High	High	High	High	High	High	High	High	High	High	High	Oxidation [P301; P304; P310; P313; P349; P352; P588; P594; P647; P648; P654; P657; P660; P971; P974]	15	Oxidation [P301; P304; P310; P313; P349; P352; P588; P594; P647; P648; P654; P657; P660; P971; P974]	0.99243	0.864182
Q05722	Collagen alpha-1(IX) chain OS=Mus musculus OX=10090 GN=Col9a1 PE=2 SV=2	2	1	1	1	1	921	92	8.95	0		1		0	179.68	179.38	2.28	6.51	174.9	181.1	181.2	176.3	184.9	166	194.9	185.7	180.2	170.1	High	High	High	High	High	High	High	High	High	High	High	Oxidation [P747; P752; P753]	3	Oxidation [P747; P752; P753]	0.99833	0.956061
Q04857	Collagen alpha-1(VI) chain OS=Mus musculus OX=10090 GN=Col6a1 PE=1 SV=1	22	20	56	20	1	1025	108.4	5.36	489	106.67	20	20	0	2665.12	2869.12	9.61	44.51	2806.2	2702.9	2394.8	2967.1	2454.6	2224.2	2119.1	2466.7	5140.4	2395.2	High	High	High	High	High	High	High	High	High	High	High	Oxidation [P264; P444; P483]	0		1.07654	0.709634
Q63870	Collagen alpha-1(VII) chain OS=Mus musculus OX=10090 GN=Col7a1 PE=1 SV=3	0	1	1	1	1	2944	295.1	6.34		0		1	0	#DIV/0!	#DIV/0!													Medium	Medium	Medium	Medium	Medium	Medium	Medium	Medium	Medium	Medium	Medium	Oxidation [P1489]	1	Oxidation [P1489]	#DIV/0!	#DIV/0!
Q05306	Collagen alpha-1(X) chain OS=Mus musculus OX=10090 GN=Col10a1 PE=2 SV=1	2	1	1	1	1	680	66.7	9.79		2.08		1	0	#DIV/0!	#DIV/0!													High	High	High	High	High	High	High	High	High	High	High	Oxidation [P394]	1	Oxidation [P394]	#DIV/0!	#DIV/0!
Q60847	Collagen alpha-1(XII) chain OS=Mus musculus OX=10090 GN=Col12a1 PE=2 SV=3	0	1	2	1	1	3120	340	5.64	0	2.18	1	1	0	129.92	139.94	7.73	6.94	128.3	119.4	136.3	141.1	124.5	150.8	146.2	129	143.2	130.5	High	High	High	High	High	High	High	High	High	High	High	Oxidation [P1247]	1	Oxidation [P1247]	1.07712	0.191839
O35206	Collagen alpha-1(XV) chain OS=Mus musculus OX=10090 GN=Col15a1 PE=1 SV=2	9	12	48	12	1	1367	140.4	4.89	289	74.71	12	12	0	2473.78	2459.54	9.13	7.02	2183	2503.8	2523.6	2316	2842.5	2538.2	2618.1	2274.4	2271.9	2595.1	High	High	High	High	High	High	High	High	High	High	High	Oxidation [P688; P690; P691; P773; P774; P776]	6	Oxidation [P688; P690; P691; P773; P774; P776]	0.994244	0.907246
Q8BLX7	Collagen alpha-1(XVI) chain OS=Mus musculus OX=10090 GN=Col16a1 PE=1 SV=2	1	1	1	1	1	1580	155.7	7.91	0		1		0	11.02	11.6	25.53	9.76	10.1	12.9	13.9	7.3	10.9	12.4	13.1	10.9	11.3	10.3	Medium	Medium	Medium	Medium	Medium	Medium	Medium	Medium	Medium	Medium	Medium		0		1.05263	0.655255
P39061	Collagen alpha-1(XVIII) chain OS=Mus musculus OX=10090 GN=Col18a1 PE=1 SV=4	2	3	7	3	1	1774	182.1	5.62	27	8.6	2	3	0	419.52	658.54	14.61	19.37	388.3	457.2	515.8	362.1	374.2	767	732.3	552.5	490.6	750.3	High	High	High	High	High	High	High	High	High	High	High		0		1.56975	0.0246751
Q8K4G2	Collagen alpha-1(XXIII) chain OS=Mus musculus OX=10090 GN=Col23a1 PE=2 SV=2	5	2	8	1	1	532	51.4	6.89	26	5.33	2	1	1	654.34	702.94	19.41	4.01	502.1	837.7	620.6	759.9	551.4	701.8	679.8	685.1	750.8	697.2	High	High	High	High	High	High	High	High	High	High	High	Oxidation [P201; P204; P208]	3	Oxidation [P201; P204; P208]	1.07427	0.481222
Q01149	Collagen alpha-2(I) chain OS=Mus musculus OX=10090 GN=Col1a2 PE=1 SV=2	9	5	7	5	1	1372	129.5	9.19	68	12.16	3	4	0	323.8	308.44	8.42	8.8	366.4	288	327.9	334.8	301.9	303	295.1	296.6	356.4	291.1	High	High	High	High	High	High	High	High	High	High	High	Oxidation [P210; P510; P513; P554; P558; P564; P566; P576; P854; P864; P876; P882; P891; P900; P902; P908]	0		0.952563	0.361478
P08122	Collagen alpha-2(IV) chain OS=Mus musculus OX=10090 GN=Col4a2 PE=1 SV=4	10	11	26	11	1	1707	167.2	8.48	282	54.56	11	11	0	1732.28	1775.3	3.82	2.96	1780.5	1774.9	1720.7	1707.7	1677.6	1746.7	1809.8	1701.3	1784.4	1834.3	High	High	High	High	High	High	High	High	High	High	High	Oxidation [P63; P68; P74; P75; P81; P363; P372; P378; P381; P386; P387; P768; P776; P851; P854; P860; P1408; P1416; P1419; P1420; P1423; P1444]	22	Oxidation [P63; P68; P74; P75; P81; P363; P372; P378; P381; P386; P387; P768; P776; P851; P854; P860; P1408; P1416; P1419; P1420; P1423; P1444]	1.02483	0.281443
Q3U962	Collagen alpha-2(V) chain OS=Mus musculus OX=10090 GN=Col5a2 PE=1 SV=1	1	1	1	1	1	1497	144.9	6.7	0		1		0	#DIV/0!	#DIV/0!													High	High	High	High	High	High	High	High	High	High	High	Oxidation [P918; P920]	0		#DIV/0!	#DIV/0!
Q02788	Collagen alpha-2(VI) chain OS=Mus musculus OX=10090 GN=Col6a2 PE=1 SV=3	9	9	29	9	1	1034	110.3	6.42	199	57.85	9	9	0	2446.44	2608.02	10.51	48.26	2745.2	2317	2126.2	2705.2	2338.6	1829.1	1908.1	2178.4	4834.1	2290.4	High	High	High	High	High	High	High	High	High	High	High	Oxidation [P372; P378; P498]	3	Oxidation [P372; P378; P498]	1.06605	0.771629
A6H584	Collagen alpha-5(VI) chain OS=Mus musculus OX=10090 GN=Col6a5 PE=1 SV=4	0	1	2	1	1	2640	289.4	6.57	0	2.25	1	1	0	191.24	245.32	6.5	34.77	178.1	208.8	200.4	184.2	184.7	211.1	179.3	184.1	267.8	384.3	High	High	High	High	High	High	High	High	High	High	High		0		1.28279	0.262397
Q9EQG9	Collagen type IV alpha-3-binding protein OS=Mus musculus OX=10090 GN=Col4a3bp PE=1 SV=1	9	5	12	5	1	624	71.1	5.44	93	21.09	5	5	0	459.24	491.24	5.01	2.97	416.8	469.9	455.3	470.7	483.5	511.2	475.9	483.5	484.1	501.5	High	High	High	High	High	High	High	High	High	High	High		0		1.06968	0.116276
E9PWQ3	Collagen, type VI, alpha 3 OS=Mus musculus OX=10090 GN=Col6a3 PE=1 SV=2	12	31	37	31	1	3284	353.7	6.93		144.57		31	0	3471.8	3610.24	12.06	41.48	3377.1	3701.2	3098.6	4073.9	3108.2	2825.2	2663.2	3085.5	6261.1	3216.2	High	High	High	High	High	High	High	High	High	High	High	Oxidation [P2061; P2235; P2236; P2245]	0		1.03988	0.814146
Q8K4Q8	Collectin-12 OS=Mus musculus OX=10090 GN=Colec12 PE=1 SV=1	1	1	3	1	1	742	81.3	5.49	0	2.51	1	1	0	#DIV/0!	#DIV/0!													High	High	High	High	High	High	High	High	High	High	High		0		#DIV/0!	#DIV/0!
Q8K4M5	COMM domain-containing protein 1 OS=Mus musculus OX=10090 GN=Commd1 PE=1 SV=2	6	2	4	2	1	188	21	7.59	40	7.62	2	2	0	355.42	351.82	7.06	7.41	338.9	358.3	395.3	363.2	321.4	345.2	314.7	368.1	383.6	347.5	High	High	High	High	High	High	High	High	High	High	High		0		0.989871	0.804671
Q8JZY2	COMM domain-containing protein 10 OS=Mus musculus OX=10090 GN=Commd10 PE=1 SV=1	12	2	4	2	1	202	22.8	6.65	51	6.56	2	2	0	46.96	50.26	7.02	16.46	49.6	45.4	48.2	43	48.6	50.9	49.1	40.9	46.9	63.5	High	High	High	High	High	High	High	High	High	High	High		0		1.07027	0.404691
Q63829	COMM domain-containing protein 3 OS=Mus musculus OX=10090 GN=Commd3 PE=1 SV=1	28	4	9	4	1	195	22	5.59	26	12.34	4	4	0	19.38	16.58	11.9	30.62	16	20.7	18.8	21.6	19.8	25	15.7	16.9	11.9	13.4	High	High	High	High	High	High	High	High	High	High	High		0		0.855521	0.43165
Q3V4B5	COMM domain-containing protein 6 OS=Mus musculus OX=10090 GN=Commd6 PE=1 SV=1	10	1	2	1	1	87	9.8	5.38	51	2.7	1	1	0	#DIV/0!	#DIV/0!													High	High	High	High	High	High	High	High	High	High	High		0		#DIV/0!	#DIV/0!
Q8BG94	COMM domain-containing protein 7 OS=Mus musculus OX=10090 GN=Commd7 PE=1 SV=1	6	1	2	1	1	200	22.6	5.94	0	2.63	1	1	0	#DIV/0!	#DIV/0!													High	High	High	High	High	High	High	High	High	High	High		0		#DIV/0!	#DIV/0!
Q9CZG3	COMM domain-containing protein 8 OS=Mus musculus OX=10090 GN=Commd8 PE=1 SV=1	16	3	11	3	1	183	20.8	5.59	26	26.31	1	3	0	510.36	513.48	3.12	5.71	507.6	501.5	521.2	488.9	532.6	523.7	512.5	535.6	463.5	532.1	High	High	High	High	High	High	High	High	High	High	High		0		1.00611	0.705896
Q8K2Q0	COMM domain-containing protein 9 OS=Mus musculus OX=10090 GN=Commd9 PE=1 SV=3	32	3	7	3	1	198	21.8	5.82	104	23.14	2	3	0	135.62	137.94	7.37	10.56	133	154.5	131.9	125.5	133.2	146.6	115	131.8	149.1	147.2	High	High	High	High	High	High	High	High	High	High	High		0		1.01711	0.844872
P01027	Complement C3 OS=Mus musculus OX=10090 GN=C3 PE=1 SV=3	16	21	43	21	1	1663	186.4	6.73	236	85.95	17	21	0	2388.42	2588.68	8.71	18.46	2710.8	2109.7	2521.8	2270.3	2329.5	2265	2275.8	2345.1	2665.3	3392.2	High	High	High	High	High	High	High	High	High	High	High		0		1.08385	0.482671
P01029	Complement C4-B OS=Mus musculus OX=10090 GN=C4b PE=1 SV=3	4	7	15	7	1	1738	192.8	7.53	92	23.56	6	7	0	1136.98	1057.12	6.98	9.6	1283.4	1063	1140.5	1078.3	1119.7	974.2	1071.3	972.1	1220.7	1047.3	High	High	High	High	High	High	High	High	High	High	High		0		0.929761	0.356586
P06684	Complement C5 OS=Mus musculus OX=10090 GN=C5 PE=1 SV=2	0	1	4	1	1	1680	188.8	6.81	0	5.12	1	1	0	1356.5	1305.94	10	11.5	1368.5	1165.6	1518.2	1298.5	1431.7	1175.6	1271.3	1384.9	1525.1	1172.8	High	High	High	High	High	High	High	High	High	High	High		0		0.962728	0.614338
Q8R5L1	Complement component 1 Q subcomponent-binding protein, mitochondrial OS=Mus musculus OX=10090 GN=C1qbp PE=1 SV=1	43	8	128	8	1	279	31	4.87		605.93		8	0	22554.8	22221.9	2.72	5.36	22225.2	21831.8	23190.9	22156.6	23369.5	22039.2	24294.2	21871.6	21329.5	21574.9	High	High	High	High	High	High	High	High	High	High	High	Oxidation [P186]	0		0.98524	0.679273
O89103	Complement component C1q receptor OS=Mus musculus OX=10090 GN=Cd93 PE=1 SV=1	22	9	31	9	1	644	69.3	5.07	413	77.76	9	9	0	2348.54	2674.08	4.06	11.96	2205.9	2474.8	2426	2297.1	2338.9	3183.1	2698.6	2523.4	2318.9	2646.4	High	High	High	High	High	High	High	High	High	High	High		0		1.13861	0.128416
Q8K182	Complement component C8 alpha chain OS=Mus musculus OX=10090 GN=C8a PE=1 SV=1	2	1	1	1	1	587	66	6.54		2.23		1	0	#DIV/0!	#DIV/0!													High	High	High	High	High	High	High	High	High	High	High		0		#DIV/0!	#DIV/0!
Q64735	Complement component receptor 1-like protein OS=Mus musculus OX=10090 GN=Cr1l PE=1 SV=1	16	8	25	8	1	483	53.7	6.65	113	42.9	8	8	0	2701.22	2855.74	3.44	3.49	2697.8	2622.8	2869.8	2656.8	2658.9	2943.3	2810.9	2965.8	2723.2	2835.5	High	High	High	High	High	High	High	High	High	High	High		0		1.0572	0.00890989
P19070	Complement receptor type 2 OS=Mus musculus OX=10090 GN=Cr2 PE=1 SV=1	1	1	2	1	1	1025	112.9	7.31	0	1.92	1	1	0	518.46	516.88	7.3	7.2	527.3	465.8	555.4	558	485.8	497.8	502.4	581.5	513.5	489.2	Medium	Medium	Medium	Medium	Medium	Medium	Medium	Medium	Medium	Medium	Medium		0		0.996953	0.924225
Q8BUY5	Complex I assembly factor TIMMDC1, mitochondrial OS=Mus musculus OX=10090 GN=Timmdc1 PE=1 SV=1	28	7	47	7	1	285	31.8	9.29	387	93.65	6	7	0	4150.46	3560.64	3.21	4.13	4100.9	4097.2	4176.9	4005.3	4372	3451.6	3578.5	3600.5	3775.4	3397.2	High	High	High	High	High	High	High	High	High	High	High	Oxidation [P247]	0		0.85789	0.00788538
Q9D1R1	Complex I assembly factor TMEM126B, mitochondrial OS=Mus musculus OX=10090 GN=Tmem126b PE=1 SV=1	10	2	11	2	1	230	25.4	9.51	197	25.2	2	2	0	1014.66	1182.04	4.01	6.91	1016	1054.7	1041.7	989.1	971.8	1251.6	1246.4	1151.6	1054.8	1205.8	High	High	High	High	High	High	High	High	High	High	High		0		1.16496	0.00803758
Q9CWX2	Complex I intermediate-associated protein 30, mitochondrial OS=Mus musculus OX=10090 GN=Ndufaf1 PE=1 SV=2	44	16	61	16	1	328	37.8	8.6	244	111.68	16	16	0	5377.72	5656.22	3.12	4.37	5242.8	5412.7	5667.4	5241.8	5323.9	5950.8	5864.6	5462.6	5382.2	5620.9	High	High	High	High	High	High	High	High	High	High	High		0		1.05179	0.142624
Q9DA03	Complex III assembly factor LYRM7 OS=Mus musculus OX=10090 GN=Lyrm7 PE=3 SV=2	46	7	23	7	1	104	12	9.45	119	40.13	6	7	0	2551.46	2283.16	3.04	11.85	2595.9	2496.3	2675.5	2518.9	2470.7	2306.2	2248.9	2697.3	1943.2	2220.2	High	High	High	High	High	High	High	High	High	High	High		0		0.894845	0.0473837
P84086	Complexin-2 OS=Mus musculus OX=10090 GN=Cplx2 PE=1 SV=1	17	1	2	1	1	134	15.4	5.08	89	6.62	1	1	0	83.62	91.5	7.58	6.19	81	81.4	90.6	77.1	88	95.8	99	87.5	89.3	85.9	High	High	High	High	High	High	High	High	High	High	High		0		1.09424	0.145394
Q6ZQK0	Condensin-2 complex subunit D3 OS=Mus musculus OX=10090 GN=Ncapd3 PE=1 SV=3	1	1	4	1	1	1506	169.3	7.15	0		1		0	36.14	30.84	7.92	21.92	33.6	32.8	40.6	36	37.7	31.3	35.9	38.8	25	23.2	Medium	Medium	Medium	Medium	Medium	Medium	Medium	Medium	Medium	Medium	Medium		0		0.853348	0.176399
Q6DFV1	Condensin-2 complex subunit G2 OS=Mus musculus OX=10090 GN=Ncapg2 PE=1 SV=2	1	1	2	1	1	1138	130.8	6.93	0	1.93	1	1	0	#DIV/0!	#DIV/0!													High	High	High	High	High	High	High	High	High	High	High		0		#DIV/0!	#DIV/0!
P29268	Connective tissue growth factor OS=Mus musculus OX=10090 GN=Ctgf PE=2 SV=3	5	2	3	2	1	348	37.8	7.81	16	3.85	1	2	0	#DIV/0!	#DIV/0!													High	High	High	High	High	High	High	High	High	High	High		0		#DIV/0!	#DIV/0!
Q80YA9	Connector enhancer of kinase suppressor of ras 2 OS=Mus musculus OX=10090 GN=Cnksr2 PE=1 SV=1	1	1	1	1	1	1032	117.3	6.79	0		1		0	252.36	242.84	4.84	3.15	267.1	247.4	260.1	253.9	233.3	235.1	237.2	245.6	241.9	254.4	Medium	Medium	Medium	Medium	Medium	Medium	Medium	Medium	Medium	Medium	Medium		0		0.962276	0.329692
Q8BMA3	Connector enhancer of kinase suppressor of ras 3 OS=Mus musculus OX=10090 GN=Cnksr3 PE=1 SV=1	1	1	1	1	1	555	61.8	9.01	0		1		0	#DIV/0!	#DIV/0!													Medium	Medium	Medium	Medium	Medium	Medium	Medium	Medium	Medium	Medium	Medium		0		#DIV/0!	#DIV/0!
E9QL65	Conserved oligomeric Golgi complex subunit 3 OS=Mus musculus OX=10090 GN=Cog3 PE=1 SV=1	2	1	1	1	1	828	94.1	5.72		2.73		1	0	18.86	19.98	13.26	20.44	20.9	20.8	20.7	16.4	15.5	19.9	13.3	24.2	20.5	22	High	High	High	High	High	High	High	High	High	High	High		0		1.05938	0.674073
Q8R1U1	Conserved oligomeric Golgi complex subunit 4 OS=Mus musculus OX=10090 GN=Cog4 PE=1 SV=1	3	2	9	2	1	785	88.6	5.15	0	12.86	1	2	0	1889.12	1947.84	14.03	9.7	1451.3	2202.3	1848.1	2119	1824.9	1915.4	1718.4	1828.5	2105.6	2171.3	High	High	High	High	High	High	High	High	High	High	High		0		1.03108	0.741783
Q8R3I3	Conserved oligomeric Golgi complex subunit 6 OS=Mus musculus OX=10090 GN=Cog6 PE=1 SV=2	4	2	4	2	1	657	73	6.14	0	5.24	2	2	0	188.34	195.12	6.34	12.45	171.5	192.9	192.4	205.8	179.1	194.8	160.2	189.4	227.2	204	High	High	High	High	High	High	High	High	High	High	High		0		1.036	0.574708
Q9JJA2	Conserved oligomeric Golgi complex subunit 8 OS=Mus musculus OX=10090 GN=Cog8 PE=1 SV=3	1	1	2	1	1	640	71.6	5.19	0	2.79	1	1	0	#DIV/0!	#DIV/0!													High	High	High	High	High	High	High	High	High	High	High		0		#DIV/0!	#DIV/0!
Q8CBC4	Consortin OS=Mus musculus OX=10090 GN=Cnst PE=1 SV=1	11	6	12	6	1	711	76.8	4.59	67	22.45	5	6	0	228.66	247.26	9.89	6.31	203.4	264.8	221.6	243.4	210.1	258	249.7	223.9	263.7	241	High	High	High	High	High	High	High	High	High	High	High		0		1.08134	0.194299
Q6A0A9	Constitutive coactivator of PPAR-gamma-like protein 1 OS=Mus musculus OX=10090 GN=FAM120A PE=1 SV=2	22	20	59	19	1	1112	121.6	8.92	443	135	19	20	0	3504.76	3662.92	7.51	3.62	3374	3228.2	3868.9	3456.8	3595.9	3705.4	3848	3683	3579	3499.2	High	High	High	High	High	High	High	High	High	High	High		0		1.04513	0.340329
Q8C3F2	Constitutive coactivator of PPAR-gamma-like protein 2 OS=Mus musculus OX=10090 GN=Fam120c PE=1 SV=3	5	4	7	3	1	1091	119.6	8.46	65	16.89	3	4	0	277.58	323.4	5.72	12.11	260.5	286.5	297	265.3	278.6	319	292	289.2	330.9	385.9	High	High	High	High	High	High	High	High	High	High	High		0		1.16507	0.094708
P12960	Contactin-1 OS=Mus musculus OX=10090 GN=Cntn1 PE=1 SV=1	2	1	1	1	1	1020	113.3	6.16	0		1		0	#DIV/0!	#DIV/0!													Medium	Medium	Medium	Medium	Medium	Medium	Medium	Medium	Medium	Medium	Medium		0		#DIV/0!	#DIV/0!
Q9CQ13	Coordinator of PRMT5 and differentiation stimulator OS=Mus musculus OX=10090 GN=Coprs PE=1 SV=1	6	1	2	1	1	173	18.7	4.08	0	2.93	1	1	0	166	151.86	32.62	24.6	102.5	111.3	166.1	209	241.1	152.8	100.2	159.7	142.2	204.4	High	High	High	High	High	High	High	High	High	High	High		0		0.914819	0.50584
Q99LD4	COP9 signalosome complex subunit 1 OS=Mus musculus OX=10090 GN=Gps1 PE=1 SV=1	38	16	57	16	1	471	53.4	6.84	430	114.39	16	15	0	4570.38	4599.24	13.9	6.01	3723	5360.5	4367.5	5224.7	4176.2	4494.3	4254.9	4534.7	4996.4	4715.9	High	High	High	High	High	High	High	High	High	High	High		0		1.00631	0.93461
P61202	COP9 signalosome complex subunit 2 OS=Mus musculus OX=10090 GN=Cops2 PE=1 SV=1	30	13	43	13	1	443	51.6	5.53	200	66.46	13	13	0	2908.08	2952.5	13.07	7.38	2420.6	3394.5	2766.3	3310.6	2648.4	2855.8	2666.1	2925	3240.6	3075	High	High	High	High	High	High	High	High	High	High	High		0		1.01527	0.846219
O88543	COP9 signalosome complex subunit 3 OS=Mus musculus OX=10090 GN=Cops3 PE=1 SV=3	34	12	51	12	1	423	47.8	6.65	526	113.66	12	12	0	4689.56	4597.1	11.68	5.33	4056.4	5369.3	4466.7	5276.5	4278.9	4659.2	4241.6	4513.7	4911.2	4659.8	High	High	High	High	High	High	High	High	High	High	High		0		0.980284	0.777612
O88544	COP9 signalosome complex subunit 4 OS=Mus musculus OX=10090 GN=Cops4 PE=1 SV=1	45	13	40	13	1	406	46.3	5.83	430	87.36	12	13	0	5686.76	5577	24.99	29.39	4984.4	5744.5	5447.9	6388.8	5868.2	5389.6	5811.2	7436.2	2983.8	6264.2	High	High	High	High	High	High	High	High	High	High	High		0		0.980699	0.907712
O35864	COP9 signalosome complex subunit 5 OS=Mus musculus OX=10090 GN=Cops5 PE=1 SV=3	42	11	40	11	1	334	37.5	6.54	380	91.13	11	11	0	3089.12	3138.02	10.29	4.93	2726.5	3497.9	3041.9	3410.1	2769.2	3097.9	2955.8	3071.1	3368.5	3196.8	High	High	High	High	High	High	High	High	High	High	High		0		1.01583	0.792582
O88545	COP9 signalosome complex subunit 6 OS=Mus musculus OX=10090 GN=Cops6 PE=1 SV=1	31	7	22	7	1	324	35.9	5.73	226	53.89	6	7	0	716.36	746.82	8.74	5.32	640.8	810.2	710.2	759.2	661.4	760	685.1	731	775.7	782.3	High	High	High	High	High	High	High	High	High	High	High		0		1.04252	0.535798
Q9CZ04	COP9 signalosome complex subunit 7a OS=Mus musculus OX=10090 GN=Cops7a PE=1 SV=2	23	6	30	6	1	275	30.2	7.87	225	61.18	6	6	0	1988.16	1972.08	11.45	4.96	1722.6	2306.6	1908	2196	1807.6	1915.9	1863.6	1935.3	2101.4	2044.2	High	High	High	High	High	High	High	High	High	High	High		0		0.991912	0.901555
Q8VBV7	COP9 signalosome complex subunit 8 OS=Mus musculus OX=10090 GN=Cops8 PE=1 SV=1	35	5	28	5	1	209	23.2	5.2	340	67.05	5	5	0	1410.24	1355.94	8.65	4.31	1281.5	1599.8	1391.7	1487.1	1291.1	1338.2	1283.5	1350.5	1445.7	1361.8	High	High	High	High	High	High	High	High	High	High	High		0		0.961496	0.478971
Q8C166	Copine-1 OS=Mus musculus OX=10090 GN=Cpne1 PE=1 SV=1	18	10	25	9	1	536	58.8	5.66	143	42.94	10	10	0	1380.04	1421.54	3.32	2.33	1406	1391.1	1438.2	1360.1	1304.8	1412.1	1459.6	1386.7	1396.1	1453.2	High	High	High	High	High	High	High	High	High	High	High		0		1.03007	0.279852
Q8BT60	Copine-3 OS=Mus musculus OX=10090 GN=Cpne3 PE=1 SV=2	28	14	41	12	1	533	59.5	5.78	335	84.61	14	14	2	3240.26	3389.18	4	4.14	3303.9	3262.2	3436.5	3106.5	3092.2	3448.5	3557.8	3174.9	3403.4	3361.3	High	High	High	High	High	High	High	High	High	High	High		0		1.04596	0.23419
Q8BLR2	Copine-4 OS=Mus musculus OX=10090 GN=Cpne4 PE=1 SV=1	4	2	13	1	1	557	62.4	6.33	33	19.47	2	2	0	655.22	650.06	19.45	19.31	892.9	591.6	597.2	615.4	579	550.1	787.2	562.2	563.2	787.6	High	High	High	High	High	High	High	High	High	High	High		0		0.992125	0.961618
Q9WU84	Copper chaperone for superoxide dismutase OS=Mus musculus OX=10090 GN=Ccs PE=1 SV=1	16	5	13	5	1	274	28.9	6.1	76	22.04	4	5	0	1003.52	1012.46	6.81	5.3	1082.9	914.9	1067.1	933.6	1019.1	951.7	1044.8	969.3	1082.5	1014	High	High	High	High	High	High	High	High	High	High	High		0		1.00891	0.883384
Q9D8X1	Copper homeostasis protein cutC homolog OS=Mus musculus OX=10090 GN=Cutc PE=1 SV=1	37	8	18	8	1	272	29	7.34	169	37.72	8	8	0	1065.98	1077.72	4.12	5.43	1096.4	1083.2	1106	995.9	1048.4	1028.3	1050.5	1089.4	1174.6	1045.8	High	High	High	High	High	High	High	High	High	High	High		0		1.01101	0.799019
O08997	Copper transport protein ATOX1 OS=Mus musculus OX=10090 GN=Atox1 PE=1 SV=1	62	5	29	5	1	68	7.3	6.51	349	67.39	5	4	0	4039.36	3726.44	6.62	8.32	3791.7	4080.1	3847	4470.7	4007.3	4007.3	4056.7	3444.8	3383.9	3739.5	High	High	High	High	High	High	High	High	High	High	High		0		0.922532	0.228794
Q3UMF0	Cordon-bleu protein-like 1 OS=Mus musculus OX=10090 GN=Cobll1 PE=1 SV=2	18	19	55	19	1	1273	137.3	8.16	406	122.85	18	19	0	3007.68	3068.04	4.45	3.33	2903.3	3160.1	2912.8	3093.5	2968.7	3163.6	2906	3035.9	3100.8	3133.9	High	High	High	High	High	High	High	High	High	High	High		0		1.02007	0.532614
Q08024	Core-binding factor subunit beta OS=Mus musculus OX=10090 GN=Cbfb PE=1 SV=1	14	2	6	2	1	187	22	5.77	87	14.41	2	2	0	191.8	223.64	8.83	5.83	163.1	205.1	203.8	193.5	193.5	219.7	237.6	223.8	204.1	233	High	High	High	High	High	High	High	High	High	High	High		0		1.16601	0.016051
Q62266	Cornifin-A OS=Mus musculus OX=10090 GN=Sprr1a PE=1 SV=1	11	1	2	1	1	144	15.8	7.85	0	2.42	1	1	0	124.58	139.04	7.85	21.2	116.2	127.3	139.5	127.3	112.6	123.1	126.4	128.5	191.7	125.5	High	High	High	High	High	High	High	High	High	High	High		0		1.11607	0.331951
O89053	Coronin-1A OS=Mus musculus OX=10090 GN=Coro1a PE=1 SV=5	6	2	4	2	1	461	51	6.48	68	6.71	2	2	0	26.02	29.54	23.02	11.63	37.8	24	21.9	24.7	21.7	30	34.6	25.2	30.1	27.8	High	High	High	High	High	High	High	High	High	High	High		0		1.13528	0.315491
Q9WUM3	Coronin-1B OS=Mus musculus OX=10090 GN=Coro1b PE=1 SV=1	15	7	12	7	1	484	53.9	5.78	131	22.62	5	7	0	1414.84	1528.58	5.87	7.78	1507.7	1452.6	1347	1320.3	1446.6	1530.2	1671	1458.2	1372.3	1611.2	High	High	High	High	High	High	High	High	High	High	High		0		1.08039	0.0337296
Q9WUM4	Coronin-1C OS=Mus musculus OX=10090 GN=Coro1c PE=1 SV=2	2	1	2	1	1	474	53.1	7.08	32	3.54	1	1	0	124.76	150.32	11.69	14.05	126.9	115.9	140.5	105.8	134.7	151.7	149.1	125.3	142.2	183.3	High	High	High	High	High	High	High	High	High	High	High		0		1.20487	0.0786289
Q920M5	Coronin-6 OS=Mus musculus OX=10090 GN=Coro6 PE=1 SV=1	1	1	2	1	1	471	52.6	5.96	0	2.54	1	1	0	70.52	72.76	7.79	16.2	79.4	71.9	64.6	68.6	68.1	69.5	88.1	62	62.3	81.9	High	High	High	High	High	High	High	High	High	High	High		0		1.03176	0.696897
Q9D2V7	Coronin-7 OS=Mus musculus OX=10090 GN=Coro7 PE=1 SV=2	14	9	21	9	1	922	100.7	5.77	234	47.12	8	9	0	747.72	794.02	5.07	6.66	795.8	733.9	782.7	690.3	735.9	821.1	762.7	717	823.9	845.4	High	High	High	High	High	High	High	High	High	High	High		0		1.06192	0.259745
Q9D273	Corrinoid adenosyltransferase OS=Mus musculus OX=10090 GN=Mmab PE=1 SV=1	48	10	28	10	1	237	26.3	9.2	290	58.45	8	10	0	1211.58	1251	3.46	15.08	1251.9	1144.9	1219.6	1185.5	1256	1092.4	1093.9	1341.9	1535.1	1191.7	High	High	High	High	High	High	High	High	High	High	High		0		1.03254	0.683624
Q8CIT0	Corticoliberin OS=Mus musculus OX=10090 GN=Crh PE=2 SV=1	7	1	1	1	1	187	20.8	10.52		2.87		1	0	86.68	93.32	19.93	6.62	99.6	74	110.2	67.4	82.2	87.6	100.8	86.4	94.6	97.2	Medium	Medium	Medium	Medium	Medium	Medium	Medium	Medium	Medium	Medium	Medium		0		1.0766	0.558751
P50172	Corticosteroid 11-beta-dehydrogenase isozyme 1 OS=Mus musculus OX=10090 GN=Hsd11b1 PE=1 SV=3	18	7	21	7	1	292	32.3	8.46	128	35.08	7	7	0	2699.18	2267.1	7.31	21.53	2940.3	2460	2588.3	2878.6	2628.7	2209.4	1984.6	2031.3	3124.4	1985.8	High	High	High	High	High	High	High	High	High	High	High		0		0.839922	0.068756
Q4KML4	Costars family protein ABRACL OS=Mus musculus OX=10090 GN=Abracl PE=1 SV=1	27	2	14	2	1	81	9	5.8	172	29.46	2	2	0	923.1	915.16	8.08	4.48	901.4	978.9	874.3	966	894.9	887.8	898.3	910.6	986.8	892.3	High	High	High	High	High	High	High	High	High	High	High		0		0.991399	0.713698
Q8K199	COX assembly mitochondrial protein 2 homolog OS=Mus musculus OX=10090 GN=Cmc2 PE=3 SV=1	68	5	45	5	1	79	9.4	8.24	195	64.86	4	5	0	3802.78	3743.68	3.42	4.48	3819.7	3577.2	3952	3832.3	3832.7	3785.3	3951.1	3835.6	3546.6	3599.8	High	High	High	High	High	High	High	High	High	High	High	Acetyl [N-Term]	0		0.984459	0.639529
Q9CPZ8	COX assembly mitochondrial protein homolog OS=Mus musculus OX=10090 GN=Cmc1 PE=1 SV=1	51	7	29	7	1	106	12.5	8.24	238	51.11	6	6	0	2969.1	3049.2	4.21	3.15	3027.3	2761.6	2942	2982.8	3131.8	3166.1	3022.3	2904.4	3077.7	3075.5	High	High	High	High	High	High	High	High	High	High	High		0		1.02698	0.243615
P97792	Coxsackievirus and adenovirus receptor homolog OS=Mus musculus OX=10090 GN=Cxadr PE=1 SV=1	16	4	8	4	1	365	39.9	6.96	111	16.12	4	4	0	290.6	289.48	4.22	6.9	281.7	309.9	297.8	280.9	282.7	312.6	290.9	261.2	280.1	302.6	High	High	High	High	High	High	High	High	High	High	High		0		0.996146	0.932048
O88271	Craniofacial development protein 1 OS=Mus musculus OX=10090 GN=Cfdp1 PE=1 SV=1	19	4	11	4	1	295	32.9	4.86	55	24.46	3	4	0	565	603.86	3.98	9.04	527.6	578.4	590.1	577	551.9	637.1	607.1	542.7	558.1	674.3	High	High	High	High	High	High	High	High	High	High	High		0		1.06878	0.314334
Q04447	Creatine kinase B-type OS=Mus musculus OX=10090 GN=Ckb PE=1 SV=1	55	17	425	15	1	381	42.7	5.67	3757	883.79	17	17	0	24152	26723.7	4.34	5.1	25052.6	23976.5	25316.6	23928.9	22485.4	26834.2	27321	25263.3	25574.2	28625.8	High	High	High	High	High	High	High	High	High	High	High		0		1.10648	0.0690525
P07310	Creatine kinase M-type OS=Mus musculus OX=10090 GN=Ckm PE=1 SV=1	75	29	2801	26	1	381	43	7.06	22661	5859.7	29	28	2	287923	293393	2.78	5.98	293928	274999	291385	284246	295056	299236	291660	309424	264147	302498	High	High	High	High	High	High	High	High	High	High	High	Oxidation [P16; P21; P123; P197; P200; P270; P284]	7	Oxidation [P16; P21; P123; P197; P200; P270; P284]	1.019	0.469778
Q6P8J7	Creatine kinase S-type, mitochondrial OS=Mus musculus OX=10090 GN=Ckmt2 PE=1 SV=1	71	29	2411	21	1	419	47.4	8.4	22656	5082.49	28	29	13	240495	244024	2.68	3.87	239650	233310	235062	243811	250644	233333	247268	236254	256933	246334	High	High	High	High	High	High	High	High	High	High	High	Oxidation [P82; P125; P177; P178; P231; P234; P318]	0		1.01467	0.454965
P30275	Creatine kinase U-type, mitochondrial OS=Mus musculus OX=10090 GN=Ckmt1 PE=1 SV=1	22	10	418	2	1	418	47	8.16	1393	420.24	10	10	0	216.06	212.76	10.84	2.88	243.9	236.4	222.1	185.6	192.3	216.7	216.2	202.5	216.8	211.6	High	High	High	High	High	High	High	High	High	High	High	Oxidation [P318]	1	Oxidation [P318]	0.984726	0.794978
Q91X84	CREB-regulated transcription coactivator 3 OS=Mus musculus OX=10090 GN=Crtc3 PE=1 SV=2	3	1	2	1	1	619	67	6.83		0		1	0	7.24	6.72	36.37	33.27	9	2.6	7	10.5	7.1	8.8	4.3	5.4	9.4	5.7	High	Medium	High	High	High	High	High	High	High	High	High	Oxidation [P362]	1	Oxidation [P362]	0.928177	0.438163
P47941	Crk-like protein OS=Mus musculus OX=10090 GN=Crkl PE=1 SV=2	43	10	35	10	1	303	33.8	6.74	500	82.31	10	10	0	2323.94	2370.32	2.65	2.35	2261.6	2261.9	2401.1	2306.2	2388.9	2388.5	2370.3	2295.2	2349.5	2448.1	High	High	High	High	High	High	High	High	High	High	High		0		1.01996	0.321648
Q91YT8	CSC1-like protein 1 OS=Mus musculus OX=10090 GN=Tmem63a PE=1 SV=1	2	2	3	2	1	804	91.8	7.93	0	2.03	1	2	0	86.06	89.68	10.51	10.72	97.8	85.1	94.5	73.8	79.1	91.3	90.6	74.2	100.8	91.5	High	High	High	High	High	High	High	High	High	High	High		0		1.04206	0.676889
Q3TWI9	CSC1-like protein 2 OS=Mus musculus OX=10090 GN=Tmem63b PE=1 SV=1	5	4	7	4	1	832	94.7	7.49	37	13.47	3	4	0	122.8	126.08	18.13	28.75	142.3	111.3	131.3	121.2	107.9	190.6	116.1	106	108.5	109.2	High	High	High	High	High	High	High	High	High	High	High		0		1.02671	0.805373
Q3TP92	CTD nuclear envelope phosphatase 1 OS=Mus musculus OX=10090 GN=Ctdnep1 PE=1 SV=2	9	2	3	2	1	244	28.4	9.76	0	3.21	1	2	0	#DIV/0!	#DIV/0!													High	High	High	High	High	High	High	High	High	High	High	Oxidation [P196]	1	Oxidation [P196]	#DIV/0!	#DIV/0!
O88712	C-terminal-binding protein 1 OS=Mus musculus OX=10090 GN=Ctbp1 PE=1 SV=2	21	9	31	5	1	441	47.7	6.77	296	64.49	9	9	4	4052.96	3897.6	1.87	5.13	4116.4	4091.6	4024.1	4031.6	4001.1	3969.9	4216.4	3796	3734	3771.7	High	High	High	High	High	High	High	High	High	High	High		0		0.961668	0.103776
P56546	C-terminal-binding protein 2 OS=Mus musculus OX=10090 GN=Ctbp2 PE=1 SV=2	16	7	18	3	1	445	48.9	6.95	137	31.79	7	7	0	546.16	557	5.25	3.15	559.4	511.8	576.2	512	571.4	557.4	556.5	530.6	560.9	579.6	High	High	High	High	High	High	High	High	High	High	High		0		1.01985	0.56387
P70698	CTP synthase 1 OS=Mus musculus OX=10090 GN=Ctps1 PE=1 SV=2	17	11	31	10	1	591	66.6	6.58	214	54.5	10	11	0	1855.96	1944.32	2.57	3.55	1816.5	1815.6	1928.7	1883.4	1835.6	1845	1911.4	1950.3	2012.8	2002.1	High	High	High	High	High	High	High	High	High	High	High		0		1.04761	0.0350084
P70303	CTP synthase 2 OS=Mus musculus OX=10090 GN=Ctps2 PE=1 SV=1	6	4	7	3	1	586	65.5	6.49	30	5.97	3	4	0	131.94	142.02	4.94	3.04	130.8	134.1	138.4	135.2	121.2	137	142	139.9	142.5	148.7	High	High	High	High	High	High	High	High	High	High	High		0		1.0764	0.0885154
P49300	C-type lectin domain family 10 member A OS=Mus musculus OX=10090 GN=Clec10a PE=1 SV=1	12	3	7	3	1	304	34.6	5.55	88	11.86	3	3	0	559.86	565.06	5.29	6.72	532.8	541.3	583.7	604.3	537.2	570.5	561.9	502.6	593	597.3	High	High	High	High	High	High	High	High	High	High	High		0		1.00929	0.842437
Q149M0	C-type lectin domain family 12 member B OS=Mus musculus OX=10090 GN=Clec12b PE=1 SV=1	5	2	7	2	1	275	31.2	5.17	58	1.93	1	1	0	632	629.94	7.01	8.23	582.3	588.5	651.1	686.4	651.7	580.8	640.9	649.4	701.2	577.4	High	High	High	High	High	High	High	High	High	High	High		0		0.996741	0.925077
Q64449	C-type mannose receptor 2 OS=Mus musculus OX=10090 GN=Mrc2 PE=1 SV=3	4	5	11	5	1	1479	167	5.99	93	18.41	5	5	0	680.6	764.44	8.19	14.45	725	691.2	752	612.4	622.4	807.9	780.4	654.6	660.6	918.7	High	High	High	High	High	High	High	High	High	High	High		0		1.12319	0.253815
Q8R3V6	CUE domain-containing protein 1 OS=Mus musculus OX=10090 GN=Cuedc1 PE=2 SV=2	5	2	4	2	1	388	42.8	5.58	0	5.33	2	2	0	122.28	124.48	7.62	7.08	107.4	128.3	117.6	134.7	123.4	127.4	124.7	110.7	135.1	124.5	High	High	High	High	High	High	High	High	High	High	High		0		1.01799	0.66267
Q9CXX9	CUE domain-containing protein 2 OS=Mus musculus OX=10090 GN=Cuedc2 PE=1 SV=1	11	2	4	2	1	284	31.8	4.98	65	9.2	2	2	0	267.16	273.46	5.08	8.43	256	289	275.9	257.1	257.8	269.5	257.7	251.2	278.9	310	High	High	High	High	High	High	High	High	High	High	High		0		1.02358	0.704315
P28659	CUGBP Elav-like family member 1 OS=Mus musculus OX=10090 GN=Celf1 PE=1 SV=2	6	3	8	1	1	486	52.1	8.46	57	16.83	2	3	0	148.64	155.72	3.33	3.64	145.6	150.7	148.4	153.3	145.2	158.8	160	145.8	156.9	157.1	High	High	High	High	High	High	High	High	High	High	High		0		1.04763	0.0728982
Q9WTX6	Cullin-1 OS=Mus musculus OX=10090 GN=Cul1 PE=1 SV=1	22	14	31	14	1	776	89.6	8	109	57.1	11	14	0	1773.48	1832.48	8.48	3.6	1544.7	1956.1	1823.4	1883.6	1659.6	1889.8	1728.5	1820.5	1888.8	1834.8	High	High	High	High	High	High	High	High	High	High	High		0		1.03327	0.571969
Q9D4H8	Cullin-2 OS=Mus musculus OX=10090 GN=Cul2 PE=1 SV=2	14	11	25	11	1	745	86.8	7.01	97	39.91	10	11	0	1238.02	1241.14	19.45	7.91	992.3	1597	1121.8	1439.5	1039.5	1235.6	1179.1	1131.5	1388.5	1271	High	High	High	High	High	High	High	High	High	High	High		0		1.00252	0.980573
Q9JLV5	Cullin-3 OS=Mus musculus OX=10090 GN=Cul3 PE=1 SV=1	13	10	23	10	1	768	88.9	8.46	163	41.43	10	10	0	1851.18	1866.92	17.84	9.14	1403.4	2276.6	1771	2169.9	1635	1829.4	1683.4	1739.9	2089.8	1992.1	High	High	High	High	High	High	High	High	High	High	High		0		1.0085	0.935459
Q3TCH7	Cullin-4A OS=Mus musculus OX=10090 GN=Cul4a PE=1 SV=1	30	23	55	15	1	759	87.7	8.35	232	106.67	20	23	6	3514.08	3752.44	4.64	2.92	3293.5	3638.1	3672.3	3625.1	3341.4	3792.4	3832.7	3579.5	3844.9	3712.7	High	High	High	High	High	High	High	High	High	High	High		0		1.06783	0.0744566
A2A432	Cullin-4B OS=Mus musculus OX=10090 GN=Cul4b PE=1 SV=1	9	10	35	2	1	970	110.6	8.37	106	66.19	9	10	0	421.32	431.8	5.57	5.49	419.1	408.6	446.6	399.5	432.8	461.2	417.2	448.6	402.2	429.8	High	High	High	High	High	High	High	High	High	High	High		0		1.02487	0.266194
Q9D5V5	Cullin-5 OS=Mus musculus OX=10090 GN=Cul5 PE=1 SV=3	26	21	52	20	1	780	90.9	7.81	359	93.54	19	19	0	3449.54	3348.46	12.55	6.88	2872.1	3932.6	3348.6	3941	3153.4	3399.7	3071.9	3276	3701.6	3293.1	High	High	High	High	High	High	High	High	High	High	High		0		0.970698	0.681926
S4R1Y1	Cullin-9 OS=Mus musculus OX=10090 GN=Cul9 PE=1 SV=1	1	1	1	1	1	2530	282.3	5.45		3.31		1	0	179.08	225.42	10.87	21.59	153.9	208.8	185.6	164.3	182.8	282.1	231	208.5	153.1	252.4	High	High	High	High	High	High	High	High	High	High	High	Oxidation [P2328; P2329]	2	Oxidation [P2328; P2329]	1.25877	0.127691
Q6ZQ38	Cullin-associated NEDD8-dissociated protein 1 OS=Mus musculus OX=10090 GN=Cand1 PE=1 SV=2	27	33	86	31	1	1230	136.2	5.78	460	157.3	26	33	1	4998.86	4808	20.74	11.01	3697.3	6466	4665.4	5809.9	4355.7	4910.3	4161.4	4406.2	5486.4	5075.7	High	High	High	High	High	High	High	High	High	High	High		0		0.961819	0.767723
Q6ZQ73	Cullin-associated NEDD8-dissociated protein 2 OS=Mus musculus OX=10090 GN=Cand2 PE=1 SV=2	23	24	72	22	1	1235	135.5	5.58	584	149.28	21	24	0	5213.2	4558.44	29.81	12.49	3794	7428.8	4356.8	6566.2	3920.2	4423.4	4018.5	4115.3	5405.6	4829.4	High	High	High	High	High	High	High	High	High	High	High		0		0.874403	0.447544
Q8CI33	CWF19-like protein 1 OS=Mus musculus OX=10090 GN=Cwf19l1 PE=1 SV=2	2	1	2	1	1	537	60.2	7.14	24	1.64	1	1	0	4.76667	3.18	15.38	19.13		4.4	5.7	4.2		3.2	2.8	3.4	2.4	4.1	Not Found	High	High	High	High	Not Found	High	High	High	High	High		0		0.667133	0.0117918
Q61908	Cx9C motif-containing protein 4 OS=Mus musculus OX=10090 GN=Cmc4 PE=2 SV=1	34	2	8	2	1	68	7.7	8.38	28	18.2	2	2	0	951.36	1119.54	6.65	10.14	1028.6	918.2	977	864.4	968.6	1181.5	1169.2	1088.7	935.9	1222.4	High	High	High	High	High	High	High	High	High	High	High		0		1.17678	0.0101785
Q8BHG2	CXXC motif containing zinc binding protein OS=Mus musculus OX=10090 GN=Czib PE=1 SV=1	49	7	36	7	1	160	18	5.12	272	73.23	7	7	0	2972.84	2762.44	3.84	6.73	3033.2	2835.8	3136.4	2920.2	2938.6	2659.8	2976.2	2622.7	2953.2	2600.3	High	High	High	High	High	High	High	High	High	High	High		0		0.929226	0.170117
F6VAN0	Cyclic AMP-dependent transcription factor ATF-6 alpha OS=Mus musculus OX=10090 GN=Atf6 PE=1 SV=2	2	1	4	1	1	656	72.6	7.77	0	5.8	1	1	0	423.58	653.84	12.47	20.77	382.7	457.1	496.7	368.8	412.6	787.8	787.2	580.3	473.8	640.1	High	High	High	High	High	High	High	High	High	High	High		0		1.5436	0.0209603
Q01147	Cyclic AMP-responsive element-binding protein 1 OS=Mus musculus OX=10090 GN=Creb1 PE=1 SV=1	2	1	3	1	1	341	36.7	5.57	0	2.53	1	1	0	260.1	263.78	6.57	4.57	265.3	282.1	265.6	257	230.5	276.2	267.2	243.9	263.5	268.1	High	High	High	High	High	High	High	High	High	High	High		0		1.01415	0.743383
Q61817	Cyclic AMP-responsive element-binding protein 3 OS=Mus musculus OX=10090 GN=Creb3 PE=2 SV=2	2	1	1	1	1	404	45.1	5.01	0		1		0	#DIV/0!	#DIV/0!													High	High	High	High	High	High	High	High	High	High	High		0		#DIV/0!	#DIV/0!
D3YUJ3	Cyclin Y-like 1 OS=Mus musculus OX=10090 GN=Ccnyl1 PE=1 SV=1	5	1	1	1	1	367	41.6	6.34		3.76		1	0	#DIV/0!	#DIV/0!													High	High	High	High	High	High	High	High	High	High	High		0		#DIV/0!	#DIV/0!
P51943	Cyclin-A2 OS=Mus musculus OX=10090 GN=Ccna2 PE=1 SV=2	1	1	2	1	1	422	47.2	6.21	0	1.82	1	1	0	317.1	506.84	20.79	79.8	344.9	426.1	316.2	246.9	251.4	366	278.3	281.4	383.2	1225.3	Medium	Medium	Medium	Medium	Medium	Medium	Medium	Medium	Medium	Medium	Medium		0		1.59836	0.3993
Q14AX6	Cyclin-dependent kinase 12 OS=Mus musculus OX=10090 GN=Cdk12 PE=1 SV=2	0	1	2	1	1	1484	163.6	9.47		5.23		1	0	213.48	222.66	28.36	14.91	226.4	265.5	268.4	178.3	128.8	202.2	217.1	192.4	277.8	223.8	High	High	High	High	High	High	High	High	High	High	High		0		1.043	0.815702
Q04735	Cyclin-dependent kinase 16 OS=Mus musculus OX=10090 GN=Cdk16 PE=1 SV=1	7	3	5	1	1	496	55.9	7.87	0	8.69	2	3	0	208.44	201.68	35.31	5.47	351.1	169.7	197.1	173.6	150.7	199.2	184.5	202	211.1	211.6	High	High	High	High	High	High	High	High	High	High	High		0		0.967569	0.865891
Q8K0D0	Cyclin-dependent kinase 17 OS=Mus musculus OX=10090 GN=Cdk17 PE=1 SV=2	6	3	5	1	1	523	59.5	9.03	0	5.1	2	2	1	1053.8	1154.44	6.4	5.3	1005	1024.1	1054.9	1035.6	1149.4	1160.7	1218.5	1056.7	1146.9	1189.4	High	High	High	High	High	High	High	High	High	High	High		0		1.0955	0.0475865
Q9CPY4	Cyclin-dependent kinase 2-associated protein 2 OS=Mus musculus OX=10090 GN=Cdk2ap2 PE=1 SV=1	6	1	2	1	1	127	13.2	9.48	0	2.52	1	1	0	#DIV/0!	#DIV/0!													High	High	High	High	High	High	High	High	High	High	High		0		#DIV/0!	#DIV/0!
Q60772	Cyclin-dependent kinase 4 inhibitor C OS=Mus musculus OX=10090 GN=Cdkn2c PE=1 SV=1	5	1	2	1	1	168	18.1	6	35	3	1	1	0	#DIV/0!	#DIV/0!													High	High	High	High	High	High	High	High	High	High	High		0		#DIV/0!	#DIV/0!
Q64261	Cyclin-dependent kinase 6 OS=Mus musculus OX=10090 GN=Cdk6 PE=1 SV=2	5	1	2	1	1	326	37	6.62	0	2.37	1	1	0	20.76	22.08	12.64	9.58	20.5	23.9	20.6	16.2	22.6	25.2	23.2	21.4	20.5	20.1	High	High	High	High	High	High	High	High	High	High	High		0		1.06358	0.399402
P46414	Cyclin-dependent kinase inhibitor 1B OS=Mus musculus OX=10090 GN=Cdkn1b PE=1 SV=2	48	6	16	6	1	197	22.2	7.02	307	42.3	6	6	0	661.54	676.18	4.86	7.26	632.2	682.5	702.4	622.6	668	740.4	678.6	656.6	607.9	697.4	High	High	High	High	High	High	High	High	High	High	High		0		1.02213	0.607375
P49615	Cyclin-dependent-like kinase 5 OS=Mus musculus OX=10090 GN=Cdk5 PE=1 SV=1	30	8	15	8	1	292	33.3	7.66	69	26.99	5	8	0	280.76	280.4	18.46	6.35	214.3	357.9	305.7	293.2	232.7	259.3	303.7	266.1	286.6	286.3	High	High	High	High	High	High	High	High	High	High	High		0		0.998718	0.987577
Q99KY4	Cyclin-G-associated kinase OS=Mus musculus OX=10090 GN=Gak PE=1 SV=2	1	1	1	1	1	1305	143.6	5.73	0		1		0	#DIV/0!	#DIV/0!													High	High	High	High	High	High	High	High	High	High	High		0		#DIV/0!	#DIV/0!
Q9JJA7	Cyclin-L2 OS=Mus musculus OX=10090 GN=Ccnl2 PE=1 SV=1	1	1	3	1	1	518	58	10.18	0	4.25	1	1	0	#DIV/0!	#DIV/0!													Medium	Medium	Medium	Medium	Medium	Medium	Medium	Medium	Medium	Medium	Medium		0		#DIV/0!	#DIV/0!
Q8BGU5	Cyclin-Y OS=Mus musculus OX=10090 GN=Ccny PE=1 SV=1	16	4	11	4	1	341	39.4	7.2	107	26.72	3	4	0	922.14	929.16	18.86	15.67	1063.9	1045.5	1049.7	830.9	620.7	1005.2	941.9	985.2	1037.4	676.1	High	High	High	High	High	High	High	High	High	High	High		0		1.00761	0.907083
Q62426	Cystatin-B OS=Mus musculus OX=10090 GN=Cstb PE=1 SV=1	53	5	14	5	1	98	11	7.39	68	23.3	2	5	0	2419.26	2580.84	6.92	3.62	2648.9	2240.6	2534.2	2237	2435.6	2629.6	2484.8	2507.4	2714	2568.4	High	High	High	High	High	High	High	High	High	High	High		0		1.06679	0.159493
P21460	Cystatin-C OS=Mus musculus OX=10090 GN=Cst3 PE=1 SV=2	41	5	32	5	1	140	15.5	9	481	65.33	5	5	0	2507.78	2661.78	3.34	4.38	2465.7	2605.4	2543.6	2540	2384.2	2679.7	2753.4	2471.7	2646.4	2757.7	High	High	High	High	High	High	High	High	High	High	High		0		1.06141	0.100857
P97315	Cysteine and glycine-rich protein 1 OS=Mus musculus OX=10090 GN=Csrp1 PE=1 SV=3	24	5	14	4	1	193	20.6	8.57	71	24.69	5	5	0	974.1	1024.44	15.96	10.52	1267.7	858.6	966.3	935.8	842.1	977.7	1033.7	939.3	1207	964.5	High	High	High	High	High	High	High	High	High	High	High		0		1.05168	0.633927
P50462	Cysteine and glycine-rich protein 3 OS=Mus musculus OX=10090 GN=Csrp3 PE=1 SV=1	58	12	173	11	1	194	20.9	8.54	1823	399.11	10	12	1	26281.7	23519.6	14.36	11.04	29463	21967.1	22967.1	29478.1	27533.4	20428.5	25021.4	22778.8	27124.3	22245.2	High	High	High	High	High	High	High	High	High	High	High		0		0.894904	0.254488
Q9D1P4	Cysteine and histidine-rich domain-containing protein 1 OS=Mus musculus OX=10090 GN=Chordc1 PE=1 SV=1	40	9	30	9	1	331	37.3	7.9	299	77.92	7	9	0	2333.36	2297.46	14.12	7.26	1752.6	2580.2	2407.6	2674.4	2252	2212	2298.3	2065.5	2457.6	2453.9	High	High	High	High	High	High	High	High	High	High	High		0		0.984614	0.82965
Q9Z1J3	Cysteine desulfurase, mitochondrial OS=Mus musculus OX=10090 GN=Nfs1 PE=1 SV=3	57	21	106	21	1	459	50.5	8.16	1149	233.52	20	21	0	9908.98	10063.9	2.43	2.3	10077.5	9840.6	9480	9992.6	10154.2	9695.1	10117.8	10113.1	10333.5	10060.1	High	High	High	High	High	High	High	High	High	High	High		0		1.01564	0.431581
A0A0R4J065	Cysteine protease OS=Mus musculus OX=10090 GN=Atg4b PE=1 SV=1	13	3	3	3	1	393	44.4	5.07		14.77		3	0	138.36	145.26	10.92	7.98	115.8	155.5	145.4	143.8	131.3	156.9	158.4	134.9	141.1	135	High	High	High	High	High	High	High	High	High	High	High		0		1.04987	0.482307
Q9DBE0	Cysteine sulfinic acid decarboxylase OS=Mus musculus OX=10090 GN=Csad PE=1 SV=1	6	4	10	4	1	493	55.1	6.61	49	14.79	4	4	0	559.08	607.18	13.16	11.35	693.7	512.4	556.6	477	555.7	725.3	543.9	594.6	587	585.1	High	High	High	High	High	High	High	High	High	High	High		0		1.08603	0.0364034
Q8K353	Cysteine-rich and transmembrane domain-containing protein 1 OS=Mus musculus OX=10090 GN=Cystm1 PE=1 SV=1	10	1	2	1	1	104	11.4	4.32	40	4.12	1	1	0	346.04	363.78	5.2	9.32	344.6	347.6	378.1	335.5	324.4	406	370.8	349.8	377.3	315	High	High	High	High	High	High	High	High	High	High	High		0		1.05127	0.339918
P63254	Cysteine-rich protein 1 OS=Mus musculus OX=10090 GN=Crip1 PE=1 SV=2	43	5	28	4	1	77	8.5	8.57	47	37.46	5	5	0	3333.64	3444.88	7.98	6.98	3848.7	3114	3305	3247.8	3152.7	3641.4	3574.3	3062.1	3355.6	3591	High	High	High	High	High	High	High	High	High	High	High		0		1.03337	0.502045
Q9DCT8	Cysteine-rich protein 2 OS=Mus musculus OX=10090 GN=Crip2 PE=1 SV=1	49	10	130	9	1	208	22.7	8.63	1213	301.57	10	10	1	15909.6	16196.7	8.54	6.41	18046.8	14961.4	15109.3	15673.3	15757	15467.1	17952.7	15946.5	15404.6	16212.7	High	High	High	High	High	High	High	High	High	High	High		0		1.01805	0.765443
Q91XD7	Cysteine-rich with EGF-like domain protein 1 OS=Mus musculus OX=10090 GN=Creld1 PE=1 SV=1	20	7	15	7	1	420	45.7	5.02	225	34.39	6	7	0	1508.5	1637.94	4.3	3.96	1496.3	1466.2	1575.1	1571.3	1433.6	1749.3	1606.8	1631.2	1581.8	1620.6	High	High	High	High	High	High	High	High	High	High	High		0		1.08581	0.0415296
Q9CYA0	Cysteine-rich with EGF-like domain protein 2 OS=Mus musculus OX=10090 GN=Creld2 PE=1 SV=1	11	4	8	4	1	350	38.2	4.58	24	12.16	4	4	0	470.9	497.18	4.02	5.45	487.7	456.2	499.4	457.9	453.3	542.8	492.8	496.9	475.7	477.7	High	High	High	High	High	High	High	High	High	High	High		0		1.05581	0.0519449
Q9ER72	Cysteine--tRNA ligase, cytoplasmic OS=Mus musculus OX=10090 GN=Cars PE=1 SV=2	20	13	32	13	1	831	94.8	6.76	233	64.54	13	13	0	1303.86	1332.66	4.22	2.21	1343.2	1245.1	1386.1	1254.4	1290.5	1378.7	1297.5	1329.9	1334.1	1323.1	High	High	High	High	High	High	High	High	High	High	High		0		1.02209	0.275838
A0A0R4J0B4	Cytidine monophospho-N-acetylneuraminic acid synthetase OS=Mus musculus OX=10090 GN=Cmas PE=1 SV=1	1	1	1	1	1	432	48	8.1		1.92		1	0	#DIV/0!	#DIV/0!													Medium	Medium	Medium	Medium	Medium	Medium	Medium	Medium	Medium	Medium	Medium		0		#DIV/0!	#DIV/0!
P00158	Cytochrome b OS=Mus musculus OX=10090 GN=Mt-Cyb PE=1 SV=1	4	3	45	3	1	381	43.2	7.97	106	36.22	3	3	0	7187.42	6896.44	2.72	9.18	7234.4	7231.5	6965.5	7316.1	7189.6	6982.3	7596.5	7015.4	5860.6	7027.4	High	High	High	High	High	High	High	High	High	High	High		0		0.959515	0.400913
Q3TYS2	Cytochrome b-245 chaperone 1 OS=Mus musculus OX=10090 GN=Cybc1 PE=1 SV=2	10	2	4	2	1	187	20.9	8.59	38	6.38	2	2	0	367.64	393.62	6.41	2.73	346.1	365.4	405.7	374.4	346.6	391.3	409.1	379.3	396.7	391.7	High	High	High	High	High	High	High	High	High	High	High		0		1.07067	0.132781
P56395	Cytochrome b5 OS=Mus musculus OX=10090 GN=Cyb5a PE=1 SV=2	50	6	41	6	1	134	15.2	5.07	462	78.04	6	5	0	5245.36	5184.56	4.11	7.06	5644	5137.9	5222.3	5023	5199.6	5189.1	4877.6	5326.8	5716.9	4812.4	High	High	High	High	High	High	High	High	High	High	High		0		0.988409	0.788476
Q9CQX2	Cytochrome b5 type B OS=Mus musculus OX=10090 GN=Cyb5b PE=1 SV=1	55	6	48	6	1	146	16.3	4.89	534	122.4	5	6	0	6409.94	6794.28	3.55	3.95	6533.2	6032.8	6583.4	6629.9	6270.4	7197.9	6837.4	6581.6	6836.6	6517.9	High	High	High	High	High	High	High	High	High	High	High		0		1.05996	0.0633555
Q9CZ13	Cytochrome b-c1 complex subunit 1, mitochondrial OS=Mus musculus OX=10090 GN=Uqcrc1 PE=1 SV=2	52	20	1725	19	1	480	52.8	6.21	21822	4062.69	19	20	1	138924	139890	2.18	1.78	138888	135502	142074	136045	142110	137528	143605	140922	137848	139548	High	High	High	High	High	High	High	High	High	High	High	Oxidation [P263; P267; P408; P454; P461; P466]	0		1.00696	0.641743
Q9CPX8	Cytochrome b-c1 complex subunit 10 OS=Mus musculus OX=10090 GN=Uqcr11 PE=3 SV=1	21	1	45	1	1	56	6.5	9.82	319	75.25	1	1	0	2747.24	2780.48	2.78	3.28	2701.3	2785.8	2770.5	2631.2	2847.4	2673.2	2862.5	2694	2862.1	2810.6	High	High	High	High	High	High	High	High	High	High	High	Oxidation [P46]	0		1.0121	0.581684
A0A140LI98	Cytochrome b-c1 complex subunit 2, mitochondrial (Fragment) OS=Mus musculus OX=10090 GN=Uqcrc2 PE=1 SV=1	71	11	249	1	1	145	16	9.42		788.07		11	0	119.28	134.44	17.62	14.94	94.9	155.9	127.1	108.7	109.8	164.1	112	143.5	129	123.6	High	High	High	High	High	High	High	High	High	High	High	Oxidation [P35]	1	Oxidation [P35]	1.1271	0.445715
Q9DB77	Cytochrome b-c1 complex subunit 2, mitochondrial OS=Mus musculus OX=10090 GN=Uqcrc2 PE=1 SV=1	68	29	1828	19	1	453	48.2	9.25	19167	3628.25	29	29	15	166089	166274	1.82	2.7	166028	162834	169064	162626	169895	164731	172502	168027	160235	165875	High	High	High	High	High	High	High	High	High	High	High	Oxidation [P44; P57; P189; P193]	0		1.00111	0.942927
P99028	Cytochrome b-c1 complex subunit 6, mitochondrial OS=Mus musculus OX=10090 GN=Uqcrh PE=1 SV=2	87	10	439	10	1	89	10.4	4.87	5285	1105.88	10	8	0	38446	38766.6	3.75	6.22	37627	36801.8	40380.9	37465.3	39955	41341.8	40817	36577.8	36024.5	39072.1	High	High	High	High	High	High	High	High	High	High	High	Oxidation [P16]	0		1.00834	0.844096
Q9D855	Cytochrome b-c1 complex subunit 7 OS=Mus musculus OX=10090 GN=Uqcrb PE=1 SV=3	78	13	597	13	1	111	13.5	9.11	2832	1013.98	12	13	0	75482.7	76446.6	3.16	3.26	77295.7	73349.6	77680	73194.4	75893.9	76183.6	80124.1	76135	73117.9	76672.4	High	High	High	High	High	High	High	High	High	High	High		0		1.01277	0.557487
Q9CQ69	Cytochrome b-c1 complex subunit 8 OS=Mus musculus OX=10090 GN=Uqcrq PE=1 SV=3	55	6	435	6	1	82	9.8	10.26	2514	629.83	6	6	0	59533.3	59430.1	3.73	3.97	60561.2	55854.6	60745.3	58693.4	61811.9	57293.5	62871.9	60537.1	59160.4	57287.8	High	High	High	High	High	High	High	High	High	High	High		0		0.998268	0.961487
Q8R1I1	Cytochrome b-c1 complex subunit 9 OS=Mus musculus OX=10090 GN=Uqcr10 PE=1 SV=1	63	6	219	6	1	64	7.4	9.19	2562	536.44	6	5	0	24503.9	24105.3	3.94	3.07	23291.7	24264.7	24075.6	24678.5	26209.1	23790.2	24107.9	25184.3	23159.4	24284.7	High	High	High	High	High	High	High	High	High	High	High		0		0.983732	0.529417
Q9CR68	Cytochrome b-c1 complex subunit Rieske, mitochondrial OS=Mus musculus OX=10090 GN=Uqcrfs1 PE=1 SV=1	59	17	769	17	1	274	29.3	8.7	8096	1730.89	17	17	0	63861.7	64186.5	1.93	2.59	64264.5	62246	65224.6	62695.2	64878.4	64061.7	66743.7	64660.4	62636.8	62830.1	High	High	High	High	High	High	High	High	High	High	High	Oxidation [P35; P40]	0		1.00509	0.782739
Q9D2R6	Cytochrome c oxidase assembly factor 3 homolog, mitochondrial OS=Mus musculus OX=10090 GN=Coa3 PE=1 SV=1	26	3	14	3	1	108	12	9.86	100	23.37	3	3	0	1799.48	1699.96	2.42	5	1744.8	1798.7	1759.3	1859.8	1834.8	1779	1737.8	1754	1657.2	1571.8	High	High	High	High	High	High	High	High	High	High	High		0		0.944695	0.157264
Q8BT51	Cytochrome c oxidase assembly factor 4 homolog, mitochondrial OS=Mus musculus OX=10090 GN=COA4 PE=3 SV=1	39	4	13	4	1	87	10.1	6.9	48	28.38	3	4	0	557.98	629.8	5.75	11.2	535	523.4	584.4	547.2	599.9	692.4	683.8	632.5	515.6	624.7	High	High	High	High	High	High	High	High	High	High	High		0		1.12871	0.130552
Q99M07	Cytochrome c oxidase assembly factor 5 OS=Mus musculus OX=10090 GN=Coa5 PE=1 SV=1	45	2	7	2	1	74	8.4	8.7	78	22.11	2	2	0	1083.06	1135.32	3.64	14.88	1043	1102.4	1051.1	1077.7	1141.1	1339.3	1271.3	1075.6	920.4	1070	High	High	High	High	High	High	High	High	High	High	High		0		1.04825	0.556581
Q8BGD8	Cytochrome c oxidase assembly factor 6 homolog OS=Mus musculus OX=10090 GN=Coa6 PE=1 SV=1	61	5	28	5	1	79	9.3	8.16	507	61.1	5	5	0	2016.84	2014.7	4.07	1.32	1977.3	1974.4	2092.6	1929.5	2110.4	2001.8	2026.5	1993.6	2056	1995.6	High	High	High	High	High	High	High	High	High	High	High		0		0.998939	0.965105
Q921H9	Cytochrome c oxidase assembly factor 7 OS=Mus musculus OX=10090 GN=Coa7 PE=1 SV=1	21	5	17	5	1	231	25.6	6.29	173	35.02	4	5	0	1857.92	1845.08	3.65	4.61	1896.7	1955.4	1805.7	1816.4	1815.4	1807.9	1983.8	1861.9	1809.3	1762.5	High	High	High	High	High	High	High	High	High	High	High		0		0.993089	0.651423
Q6P8I6	Cytochrome c oxidase assembly protein COX11, mitochondrial OS=Mus musculus OX=10090 GN=Cox11 PE=1 SV=1	9	3	7	3	1	275	30.8	8.78	41	10.76	3	3	0	336.06	369.04	7.09	9.1	338.5	364.4	345	324	308.4	384	419.5	338.1	342.2	361.4	High	High	High	High	High	High	High	High	High	High	High		0		1.09814	0.0508497
Q8BH51	Cytochrome c oxidase assembly protein COX14 OS=Mus musculus OX=10090 GN=Cox14 PE=3 SV=1	26	2	22	2	1	57	6.4	9.79	62	33.1	2	2	0	3415.82	3404.92	3.67	2.94	3503.9	3198.4	3515.2	3502.8	3358.8	3392.2	3516.2	3446.2	3424.5	3245.5	High	High	High	High	High	High	High	High	High	High	High		0		0.996809	0.901441
Q8BJ03	Cytochrome c oxidase assembly protein COX15 homolog OS=Mus musculus OX=10090 GN=Cox15 PE=1 SV=1	26	8	38	8	1	413	45.8	9.79	287	83.56	7	8	0	2448.1	2264.4	4.49	5.67	2311.6	2465.3	2419.9	2596	2447.7	2250.5	2450.9	2298.1	2096.4	2226.1	High	High	High	High	High	High	High	High	High	High	High		0		0.924962	0.100202
Q9CR63	Cytochrome c oxidase assembly protein COX16 homolog, mitochondrial OS=Mus musculus OX=10090 GN=Cox16 PE=3 SV=1	42	5	10	5	1	106	12.3	9.82	94	16.1	5	4	0	1133.64	1152.14	2.4	2.18	1107.9	1157.8	1135.6	1098.6	1168.3	1115.6	1173	1142	1152.5	1177.6	High	High	High	High	High	High	High	High	High	High	High		0		1.01632	0.108352
Q8VC74	Cytochrome c oxidase assembly protein COX18, mitochondrial OS=Mus musculus OX=10090 GN=Cox18 PE=1 SV=5	5	2	4	2	1	331	36.3	9.73	38	7.63	2	2	0	401.98	386.8	3.23	4.74	408.4	381.7	406.3	396	417.5	380.3	384.7	409.1	398.8	361.1	High	High	High	High	High	High	High	High	High	High	High		0		0.962237	0.271913
Q8K0C8	Cytochrome c oxidase assembly protein COX19 OS=Mus musculus OX=10090 GN=Cox19 PE=1 SV=1	42	4	10	4	1	92	10.8	8.07	36	19.72	3	4	0	1173.46	1189.78	5.39	3.52	1101.4	1112	1260.9	1210.2	1182.8	1131.7	1245.3	1209.7	1178.1	1184.1	High	High	High	High	High	High	High	High	High	High	High		0		1.01391	0.64105
Q9D7J4	Cytochrome c oxidase assembly protein COX20, mitochondrial OS=Mus musculus OX=10090 GN=Cox20 PE=1 SV=1	22	2	28	2	1	117	13.2	9.01	378	66.73	2	2	0	1303.88	1323.56	3.44	5.46	1283.2	1344.6	1337.9	1227.3	1326.4	1367.1	1264.9	1324	1418.8	1243	High	High	High	High	High	High	High	High	High	High	High	Oxidation [P27]	0		1.01509	0.727147
P56394	Cytochrome c oxidase copper chaperone OS=Mus musculus OX=10090 GN=Cox17 PE=1 SV=2	57	3	39	3	1	63	6.8	7.69	223	68.3	3	2	0	6415.7	6069.58	8.31	6.12	6769.3	6138.7	5599.9	6629.8	6940.8	5888.9	6139.5	5554.3	6220	6545.2	High	High	High	High	High	High	High	High	High	High	High		0		0.946051	0.0943923
P00397	Cytochrome c oxidase subunit 1 OS=Mus musculus OX=10090 GN=Mtco1 PE=1 SV=2	10	2	82	2	1	514	56.9	6.7	1601	314.85	1	2	0	2910.44	3094.82	8.26	4.08	2731.1	3274.5	3045.1	2767.8	2733.7	3308.1	3038	2975.3	3071.6	3081.1	High	High	High	High	High	High	High	High	High	High	High	Oxidation [P499; P500; P501]	3	Oxidation [P499; P500; P501]	1.06335	0.280188
P00405	Cytochrome c oxidase subunit 2 OS=Mus musculus OX=10090 GN=Mtco2 PE=1 SV=1	31	6	953	6	1	227	26	4.73	8532	1763.41	6	6	0	84905.1	87418.6	2.68	3.51	84121.4	86857.7	87115.3	80961	85469.9	88726.6	90192.3	88989.8	82380.9	86803.2	High	High	High	High	High	High	High	High	High	High	High	Oxidation [P145; P166]	2	Oxidation [P145; P166]	1.0296	0.0166403
P00416	Cytochrome c oxidase subunit 3 OS=Mus musculus OX=10090 GN=mt-Co3 PE=1 SV=2	5	1	10	1	1	261	29.9	7.3	27	14.96	1	1	0	451.08	465.38	23.15	18.73	371.9	639	426.3	391.4	426.8	619.3	422.4	420.8	450.4	414	High	High	High	High	High	High	High	High	High	High	High		0		1.0317	0.856989
P19783	Cytochrome c oxidase subunit 4 isoform 1, mitochondrial OS=Mus musculus OX=10090 GN=Cox4i1 PE=1 SV=2	70	17	922	17	1	169	19.5	9.23	7401	1662.46	15	17	0	127449	129582	1.88	3.74	126647	128116	127636	123794	131051	132771	133216	132532	122058	127330	High	High	High	High	High	High	High	High	High	High	High	Oxidation [P36]	1	Oxidation [P36]	1.01674	0.350507
Q91W29	Cytochrome c oxidase subunit 4 isoform 2, mitochondrial OS=Mus musculus OX=10090 GN=Cox4i2 PE=1 SV=1	24	3	6	3	1	172	20.2	9.47	98	15.13	3	3	0	211.26	238.48	3.27	5	208.8	217.7	215.9	206.8	207.1	237.8	233.3	229.9	232.2	259.2	High	High	High	High	High	High	High	High	High	High	High		0		1.12885	0.0163952
P12787	Cytochrome c oxidase subunit 5A, mitochondrial OS=Mus musculus OX=10090 GN=Cox5a PE=1 SV=2	58	10	904	10	1	146	16.1	6.54	7744	1678.66	10	10	0	85700.8	87797.5	3.12	5.6	84536.8	81770.3	89810.5	86500.8	85885.5	89677.4	91833	90035.5	79320.5	88121.2	High	High	High	High	High	High	High	High	High	High	High	Oxidation [P59; P80]	0		1.02447	0.502548
P19536	Cytochrome c oxidase subunit 5B, mitochondrial OS=Mus musculus OX=10090 GN=Cox5b PE=1 SV=1	59	10	1210	10	1	128	13.8	8.38	6800	1770.28	10	10	0	129862	134571	3.11	5.21	129374	126190	133382	125295	135068	138889	141115	134148	123012	135690	High	High	High	High	High	High	High	High	High	High	High	Oxidation [P60; P80; P113]	3	Oxidation [P60; P80; P113]	1.03626	0.218535
P43024	Cytochrome c oxidase subunit 6A1, mitochondrial OS=Mus musculus OX=10090 GN=Cox6a1 PE=1 SV=2	41	2	55	2	1	111	12.3	9.98	192	224.84	2	2	0	2838.86	3021.52	5.6	6.79	2813.7	2921.6	3066.3	2773.6	2619.1	3220.6	3144.8	2880.1	2734.9	3127.2	High	High	High	High	High	High	High	High	High	High	High	Oxidation [P85; P87]	2	Oxidation [P85; P87]	1.06434	0.235486
P43023	Cytochrome c oxidase subunit 6A2, mitochondrial OS=Mus musculus OX=10090 GN=Cox6a2 PE=1 SV=2	49	3	177	3	1	97	10.7	9.07	1709	486.5	3	3	0	8016.9	8335.8	3.8	1.82	7545.9	7989	8415.7	7888.9	8245	8226.2	8366.1	8418.4	8143.6	8524.7	High	High	High	High	High	High	High	High	High	High	High	Oxidation [P71; P85]	2	Oxidation [P71; P85]	1.03978	0.0435322
P56391	Cytochrome c oxidase subunit 6B1 OS=Mus musculus OX=10090 GN=Cox6b1 PE=1 SV=2	71	8	615	8	1	86	10.1	8.72	3547	1115.59	8	8	0	78076.3	79214.5	1.68	3.96	77475.3	78903.9	79816.2	77129.6	77056.6	80321.6	82879.2	79837.5	74302.9	78731.3	High	High	High	High	High	High	High	High	High	High	High	Oxidation [P66]	0		1.01458	0.392251
Q9CPQ1	Cytochrome c oxidase subunit 6C OS=Mus musculus OX=10090 GN=Cox6c PE=1 SV=3	87	12	320	12	1	76	8.5	10.14	709	308.78	9	11	0	65156.7	62276.1	5.14	5.85	64660.5	65274.9	61357.8	66297.2	68193.1	62891.5	65010.2	65643.8	56542.5	61292.5	High	High	High	High	High	High	High	High	High	High	High		0		0.95579	0.309747
P56392	Cytochrome c oxidase subunit 7A1, mitochondrial OS=Mus musculus OX=10090 GN=Cox7a1 PE=1 SV=1	29	2	342	2	1	80	9	9.79	2595	636.56	2	2	0	37312.2	36643.6	6.32	3.67	34851	36922.3	35922.8	38002.2	40862.8	36527.6	36296.5	38906.1	35306.8	36181	High	High	High	High	High	High	High	High	High	High	High	Oxidation [P40]	1	Oxidation [P40]	0.98208	0.65728
P48771	Cytochrome c oxidase subunit 7A2, mitochondrial OS=Mus musculus OX=10090 GN=Cox7a2 PE=1 SV=2	28	2	300	2	1	83	9.3	10.27	3019	634.21	2	2	0	23471.8	23512.5	4.57	5.41	23493.8	24262.1	24493	21520.1	23589.9	24265.4	25343.2	22370.1	22473.8	23110.2	High	High	High	High	High	High	High	High	High	High	High	Oxidation [P42]	0		1.00174	0.949798
Q61387	Cytochrome c oxidase subunit 7A-related protein, mitochondrial OS=Mus musculus OX=10090 GN=Cox7a2l PE=1 SV=1	68	6	24	6	1	111	12.4	9.6	129	43.82	6	6	0	5474.16	5071.92	7.34	6.17	4885.2	5165.9	5519.3	5909	5891.4	4599.5	5441.9	5195.7	5152.6	4969.9	High	High	High	High	High	High	High	High	High	High	High		0		0.92652	0.126795
P56393	Cytochrome c oxidase subunit 7B, mitochondrial OS=Mus musculus OX=10090 GN=Cox7b PE=3 SV=1	10	2	31	2	1	80	9	10.27	101	44.65	2	2	0	6369.3	6396.6	2.28	2.34	6120.8	6568.5	6411.3	6346	6399.9	6500.3	6475.6	6523.2	6175.7	6308.2	High	High	High	High	High	High	High	High	High	High	High		0		1.00429	0.797807
P17665	Cytochrome c oxidase subunit 7C, mitochondrial OS=Mus musculus OX=10090 GN=Cox7c PE=1 SV=1	32	3	229	3	1	63	7.3	11	1420	436.23	3	3	0	23993.6	24215.7	1.4	3.38	23899.8	23731.3	23897.9	23793.3	24645.5	23864.2	25227	24941.6	23365.7	23680.1	High	High	High	High	High	High	High	High	High	High	High	Oxidation [P23]	0		1.00926	0.653016
[truncated: 4,297 more rows]

## Sheet: Abnd Promx Fin
FINAL data set for proteomics of protein abundance (Figure 2A)
3737 hits from raw data sheet, calculate fold change then sort by it.
Accession	Description	WT1	WT2	WT3	WT4	WT5	KO1	KO2	KO3	KO4	KO5	KO/WT1	KO/WT2	KO/WT3	KO/WT4	KO/WT5	Ave FC	SEM	P	LOGFC	LOGP
[truncated: 3,737 more rows]

## Sheet: WB Quant
Densitometric quantitation of western blots. Protein of interest relative to Ponceau S.
[truncated: 13 more rows]

[truncated: 2 more sheets: PullDown, Enzymes]
