# Supplementary material for: ALKBH7 mediates necrosis via rewiring of glyoxal metabolism
Source: eLife journal article supplement (doi:10.7554/elife.58573), 2020-08-14
Supplement: supp [file elife-58573-supp-v1.zip › elife_poa_e58573_Source_data_3.xlsx]

## Sheet: Metabolom
Metabolomics Data Set. (Figure 3A)
WT/KO pairs 1-8 run in one batch, and 9-17 run in another batch on different matching apparatus
																																					KO/WT
	WT1	WT2	WT3	WT4	WT5	WT6	WT7	WT8	WT9	WT10	WT11	WT12	WT13	WT14	WT15	WT16	WT17		KO1	KO2	KO3	KO4	KO5	KO6	KO7	KO8	KO9	KO10	KO11	KO12	KO13	KO14	KO15	KO16	KO17		1	2	3	4	5	6	7	8	9	10	11	12	14
Histidine									2.3188	3.42666	2.87714	4.08112	2.93271	2.64063	1.77071	2.98094	2.28079										2.74563	4.00186	3.07702	2.9794	3.76522	2.70154	2.04748	2.06164	2.16726										1.18407	1.16786	1.06947	0.730046	1.28387
Carnosine									0.0288138	0.0282968	0.0599	0.0418409	0.0194222	0.0285553	0.0253755	0.0308367	0.0219521										0.00804439	0.0188525	0.0122152	0.00583349	0.0053947	0.0163839	0.0221332	0.0218941	0.0080464										0.279185	0.66624	0.203926	0.139421	0.27776
Taurine	11.6049	11.3643	11.5516	12.464	14.9918	14.5532	14.003	24.8621	8.11241	8.49889	5.95438	6.64976	8.22542	7.23507	6.03905	6.51585	5.57009		11.5147	12.9271	11.8829	10.8305	13.1795	15.0845	16.6488	19.4897	7.66079	7.1803	7.39588	7.97922	7.94939	4.72341	5.30933	4.75002	7.79107		0.99223	1.13751	1.02868	0.868941	0.879116	1.0365	1.18895	0.783911	0.94433	0.844852	1.24209	1.19993	0.966441
Phosphoethanolamine									0.00868643	0.0127424	0.0156122	0.0113848	0.0154875	0.0154428	0.0129146	0.00893737	0.010407										0.0143987	0.0164228	0.0177882	0.0177704	0.0181057	0.0109153	0.0140757	0.0107237	0.0123023										1.65761	1.28883	1.13938	1.5609	1.16906
Aspartate									4.96621	6.41661	2.40538	3.19314	3.27005	1.54841	1.51957	2.36281	1.69225										4.6184	4.53832	1.0138	4.73498	4.16179	1.56655	1.62236	1.33532	2.08696										0.929963	0.707278	0.421472	1.48286	1.2727
Threonine									0.035539	0.0447714	0.0299462	0.0315289	0.0293877	0.0254947	0.0276848	0.0452456	0.0183033										0.0266891	0.0181405	0.0208109	0.0411225	0.0292733	0.02794	0.0296499	0.0205717	0.0170734										0.75098	0.405181	0.694943	1.30428	0.996105
Glutamine									0.178679	0.253762	0.318286	0.230514	0.243429	0.275374	0.243473	0.265065	0.279158										0.20761	0.353276	0.228855	0.17763	0.251813	0.232589	0.210859	0.218694	0.28218										1.16192	1.39215	0.719022	0.770582	1.03444
Galactose									0.0301871	0.0226283	0.0385019	0.0318277	0.0448906	0.123558	0.0762877	0.0536963	0.0853235										0.0348006	0.0392783	0.0457898	0.0618326	0.0611175	0.0536971	0.0495281	0.0993909	0.0950252										1.15283	1.73581	1.18929	1.94273	1.36148
Serine									0.00395307	0.002313	0.00593776	0.00884644	0.0032273	0.00357571	0.00299483	0.00386363	0.00303311										0.0100206	0.00663347	0.00372341	0.00598727	0.0032214	0.00455694	0.00740577	0.00471738	0.00500084										2.5349	2.8679	0.627074	0.676799	0.998173
Glutamate	23.3618	17.5132	18.6956	21.456	28.5229	30.5088	28.862	1.40403e-06	3.5028	3.17346	2.46904	2.84458	4.33149	3.96146	3.52806	3.09126	2.98007		22.7812	20.0857	25.6067	20.4757	29.1908	31.5317	34.7197	1.34299e-06	4.11475	3.17905	4.61498	3.77916	4.50949	2.75996	3.30392	2.54941	3.93882		0.975149	1.14689	1.36966	0.954309	1.02342	1.03353	1.20295	0.956523	1.1747	1.00176	1.86914	1.32855	1.0411
Glutathione_reduced_(GSH)	0.0057485	0.00609198	0.00939261	0.0107078	2.55298	1.2284	0.762432	1.91401	4.3087	2.66071	1.29372	1.78721	3.78651	0.61966	0.557444	0.600141	0.476804		0.00801973	0.00330404	0.00722119	0.005653	0.445391	0.0657102	0.229893	0.672523	1.44921	0.526798	1.21672	1.66045	1.34259	0.374835	0.476195	0.388523	0.606464		1.3951	0.542359	0.768816	0.527933	0.174459	0.0534924	0.301526	0.351369	0.336345	0.197991	0.940483	0.929077	0.354571
Gluconate	0.133782	0.133782	0.133782	0.133782	0.0631262	0.0697444	0.0701429	0.120243	0.138471	0.144237	0.118075	0.129532	0.133782	0.164029	0.151031	0.174608	0.137341		0.13995	0.13995	0.13995	0.13995	0.0855774	0.0652055	0.0851968	0.0939893	0.13995	0.125408	0.164487	0.162775	0.153155	0.138033	0.164379	0.154962	0.178074		1.04611	1.04611	1.04611	1.04611	1.35566	0.93492	1.21462	0.781664	1.01068	0.869455	1.39307	1.25664	1.14481
Urate									0.197616	0.20998	0.122422	0.223927	0.222279	0.0226323	0.00218457	0.00621112	0.000775508										0.159714	0.31242	0.147849	0.169428	0.215211	0.0143449	0.0050759	0.00802737	0.0011636										0.808201	1.48785	1.20771	0.756622	0.968202
Xanthine									0.0370749	0.0229502	0.0244672	0.0192995	0.0526659	0.00954226	0.00400048	0.0384987	0.00745284										0.0398473	0.0554419	0.0290816	0.0792899	0.0568283	0.00681101	0.0053515	0.00797132	0.0320935										1.07478	2.41574	1.1886	4.10838	1.07903
Ascorbate									5.18952	7.67019	6.39748	6.2074	5.71227	0.0179029	0.00871816	0.0081257	0.00481355										3.72379	0.086012	5.744	5.41709	6.05979	0.00771807	0.0107091	0.00335058	0.0091535										0.717559	0.0112138	0.897853	0.872682	1.06084
Malate	9.25122	10.717	9.57527	9.65034	7.49076	3.36904	3.88382	4.79374	2.28844	3.34539	2.59797	4.06425	3.00234	2.5449	1.6082	2.9569	2.10239		6.61257	10.2574	10.4903	10.7736	2.42748	3.34913	3.00696	4.71174	2.63243	3.58363	3.05669	2.97733	3.74876	2.26077	1.97528	1.61109	2.17388		0.714778	0.957115	1.09556	1.11639	0.324064	0.99409	0.774225	0.982894	1.15032	1.07122	1.17657	0.732567	1.24862
Inosine	0.0754169	0.0477334	0.0345913	0.0730554	0.0775651	0.02499	0.0797133	0.115799	0.50442	0.639561	0.0839232	0.361899	0.555174	0.0628511	0.0416388	0.165716	0.0552733		0.0657926	0.0689701	0.149683	0.0681084	0.045276	0.0496768	0.0492924	0.0826743	0.200377	0.103567	0.26021	0.0681084	0.0681084	0.0364195	0.0353944	0.0378417	0.200604		0.872385	1.4449	4.32719	0.932284	0.583717	1.98787	0.618372	0.713947	0.397243	0.161935	3.10057	0.188197	0.122679
2-Hydroxyglutarate	0.0462027	0.0239618	0.0292218	0.0351108	0.014396	0.0451211	0.0536723	0.014396	0.00955828	0.0049443	0.00674464	0.0111427	0.0105728	0.0256581	0.0121959	0.014396	0.0107132		0.0284037	0.0222541	0.0308017	0.0458054	0.0464789	0.0451249	0.05207	0.0408711	0.00982713	0.015142	0.0138054	0.0104532	0.00899157	0.0293945	0.0140423	0.0314029	0.015068		0.614763	0.928731	1.05407	1.3046	3.22861	1.00008	0.970148	2.83907	1.02813	3.06253	2.04687	0.938114	0.850445
Lactate	0.360643	0.231778	0.147282	0.274021	0.218086	0.540724	0.605298	1.11107	0.210264	0.195612	0.16625	0.190074	0.191043	0.28564	0.167739	0.22024	0.177576		0.301038	0.210599	0.409117	0.339629	0.419224	0.754443	0.643809	0.787475	0.247759	0.338942	0.179495	0.197442	0.160416	0.115029	0.149597	0.100695	0.243242		0.834727	0.908626	2.77778	1.23943	1.92229	1.39525	1.06362	0.708752	1.17832	1.73272	1.07967	1.03876	0.839686
3-Hydroxybutyrate									0.00710897	0.00152596	0.0012349	0.00170847	0.00651215	0.00216439	0.00280006	0.00216439	0.00216439										0.00738436	0.00117858	0.00327578	0.00536007	0.00154285	0.00279005	0.00515243	0.00209443	0.00230217										1.03874	0.772353	2.65267	3.13734	0.236919
Succinate	2.22686	2.06517	1.5031	1.76566	1.26852	1.26401	1.85269	2.81314	0.328696	0.124937	0.466521	0.217833	0.334675	0.121644	0.141984	0.341936	0.343643		1.09546	1.34794	1.43518	1.07302	3.26787	1.25706	1.21126	3.13012	0.356695	0.223246	0.216482	0.330799	0.312955	0.207297	0.173518	0.194109	0.384312		0.491929	0.652702	0.954815	0.607717	2.57614	0.994497	0.653785	1.11268	1.08518	1.78687	0.464035	1.51859	0.935101
Erythrose-4-Phosphate	0.0959509	0.0781643	0.0583695	0.0818947	0.130649	0.0902863	0.0910484	0.126292	0.299223	0.477659	0.203404	0.37786	0.214133	0.321715	0.187809	0.226569	0.212932		0.0776289	0.0875234	0.119524	0.0811915	0.0834629	0.0939751	0.060217	0.137769	0.217148	0.140104	0.319504	0.459092	0.461973	0.245412	0.215289	0.24396	0.195811		0.809049	1.11974	2.04772	0.991414	0.638832	1.04086	0.661373	1.09087	0.725707	0.293313	1.57078	1.21498	2.15741
Glucose-1-Phosphate	0.00617107	0.00576931	0.00401531	0.00362591	0.0471765	0.0302116	0.0212029	0.0425009	1.43577	2.94042	1.42523	3.0971	1.81569	4.04376	2.09147	2.20383	1.38348		0.00537527	0.00195791	0.00420878	0.00443399	0.0245453	0.0281006	0.0228302	0.0464055	1.65268	1.07786	2.15852	3.18941	3.75944	2.39152	1.92692	1.801	1.56889		0.871045	0.339366	1.04818	1.22287	0.520288	0.930127	1.07675	1.09187	1.15108	0.366566	1.5145	1.02981	2.07053
Ribose-5-Phosphate	0.00134143	0.00108049	0.00148567	0.00213895	0.0390015	0.0759676	0.16815	0.201833	1.05263	0.741623	0.618006	1.23009	1.41127	0.0972315	0.105689	0.446161	0.100563		0.00228513	0.000453143	0.00248771	0.00167786	0.118796	0.118645	0.13639	0.156909	0.833076	1.66876	0.633802	1.19399	1.31775	0.0477494	0.0393925	0.0213053	0.197864		1.70351	0.419386	1.67447	0.784432	3.04593	1.56179	0.811122	0.777421	0.791423	2.25015	1.02556	0.970653	0.933733
Sedoheptulose-7-Phosphate	0.00805199	0.00682701	0.00228026	0.00460842	0.0414456	0.0558967	0.072137	0.096628	0.0791241	0.105183	0.0613401	0.0622906	0.0703827	0.149247	0.107587	0.17005	0.124862		0.00479717	0.0060147	0.00909307	0.00723825	0.060197	0.0616424	0.0624973	0.0824614	0.0753904	0.0342903	0.0612435	0.0948214	0.0591409	0.102979	0.113884	0.116943	0.123446		0.595775	0.881015	3.98773	1.57066	1.45243	1.10279	0.866369	0.85339	0.952812	0.326007	0.998426	1.52224	0.840276
Glucose-6-Phosphate	1.79195	1.79195	1.79195	1.79195	0.125042	0.0653072	0.0692494	0.102057	1.79195	3.36899	1.51949	3.4828	1.94789	4.96436	2.20401	2.89346	1.56291		1.83058	1.83058	1.83058	1.83058	0.0443897	0.0671821	0.0634677	0.0743546	1.79981	1.30352	2.78437	3.64357	4.28004	2.85905	2.36395	2.07047	1.83058		1.02156	1.02156	1.02156	1.02156	0.354999	1.02871	0.916509	0.728559	1.00439	0.386917	1.83243	1.04616	2.19727
Fructose-6-Phosphate	0.0627347	0.0262762	0.0192366	0.0139979	0.118709	0.0480979	0.0379063	0.0694057	1.46827	2.83794	1.28729	2.74259	1.60094	4.21656	1.98594	2.28079	1.44572		0.0430845	0.0191398	0.0149645	0.018146	0.0341971	0.0436849	0.0385441	0.0552281	1.53441	1.17107	2.42513	2.99041	3.73943	2.25806	2.0681	1.82501	1.63342		0.686774	0.728408	0.777921	1.29633	0.288075	0.908249	1.01683	0.795729	1.04504	0.412648	1.88391	1.09036	2.33578
Dihydroxyacetone-Phosphate	0.00157872	0.000958	0.00127617	0.00116183	0.00250462	0.000710311	0.000427402	0.0011202	0.0143587	0.0537366	0.0125362	0.0298175	0.0232936	0.140734	0.18501	0.110642	0.0989016		0.00181271	0.000891627	0.00149942	0.00136585	0.000598342	0.000591504	0.000135549	0.000487201	0.0354734	0.0461337	0.0356894	0.0578717	0.0770175	0.0387278	0.132359	0.144356	0.12922		1.14822	0.930717	1.17494	1.1756	0.238895	0.832739	0.317148	0.434922	2.47052	0.858516	2.84691	1.94087	3.30638
Propanoyl-Carnitine									0.000177959	0.000125449	0.00066269	0.000200336	0.000330321	0.00103739	8.02385e-05	0.000215668	0.000231										8.27092e-05	0.000332954	0.000706626	0.000104733	2.18634e-05	0.000160275	0.000335644	0.000497359	0.000100393										0.464766	2.65409	1.0663	0.522784	0.0661881
Glyceraldehyde-3-Phosphate	0.479043	0.331872	0.223234	0.320894	0.441169	0.0396295	0.0392501	0.242885	0.0243104	0.0316843	0.0160803	0.0209722	0.0130105	0.0855505	0.154924	0.132619	0.102671		0.37507	0.388082	0.463535	0.562608	0.0507325	0.104551	0.0270546	0.0389112	0.0335787	0.038551	0.016997	0.0324924	0.067066	0.0320926	0.0899861	0.108611	0.101266		0.782956	1.16938	2.07646	1.75325	0.114996	2.63821	0.689288	0.160204	1.38125	1.21672	1.05701	1.54931	5.15476
Itaconate									0.193194	0.12166	0.177777	0.113831	0.207984	0.280531	0.193285	0.193103	0.21424										0.202109	0.20809	0.209933	0.152088	0.154397	0.236218	0.206246	0.228963	0.232381										1.04615	1.71042	1.18088	1.33609	0.74235
Ribulose-5-Phosphate									1.1746	1.37739	1.81005	2.42637	2.67769	0.273334	0.252856	1.03872	0.257095										1.44728	0.941577	1.44588	1.77128	1.90117	0.238375	0.172539	0.203187	0.437279										1.23214	0.683596	0.798804	0.730011	0.710005
Carnitine									0.92504	0.762412	1.45379	1.16759	1.18644	1.67951	1.2456	1.33782	1.66261										1.17729	0.972206	1.08733	1.0833	1.36188	0.971031	1.33344	1.5207	1.61445										1.27269	1.27517	0.747928	0.927806	1.14788
Acetyl-Carnitine									0.242169	0.209106	0.274705	0.267102	0.294125	0.368849	0.2861	0.322623	0.369559										0.294291	0.233268	0.327454	0.30886	0.355362	0.191511	0.261258	0.393832	0.353271										1.21523	1.11555	1.19202	1.15634	1.2082
Phenylalanine									1.51461	1.76608	2.69874	1.37106	0.982626	1.15834	0.667905	0.744581	0.592863										1.64256	3.02932	1.79626	1.2908	1.2302	0.741311	0.601865	0.691318	0.707179										1.08448	1.71528	0.66559	0.941463	1.25195
Creatine-Phosphate									0.00186631	0.00327288	0.00113969	0.00476755	0.00280878	0.137881	0.10052	0.0677735	0.062391										0.00571501	0.000656948	0.022678	0.00134067	0.0017863	0.11498	0.118963	0.120807	0.0396409										3.0622	0.200725	19.8984	0.281207	0.635969
Pantothenate	0.475923	0.283027	0.473273	0.402208	0.566139	0.289385	0.278823	0.469879	0.443673	0.131157	0.464949	0.287742	0.311617	0.593743	0.478649	0.451052	0.436295		0.439052	0.433186	0.53571	0.467246	0.467909	0.193693	0.260347	0.604357	0.129387	0.314906	0.338467	0.259522	0.532997	0.50803	0.376709	0.32878	0.587658		0.922526	1.53055	1.13193	1.1617	0.82649	0.669325	0.933736	1.2862	0.291627	2.40098	0.727966	0.901927	1.71042
Nic_Ad_Dinuc_Red_(NADH)	1.23913	1.12443	1.63316	0.650192	0.294776	1.21115	0.834645	0.599857	0.0159158	0.0216985	0.0273532	0.017844	0.0221137	0.0646558	0.0583786	0.0468733	0.0591636		1.38994	1.10895	0.791453	1.09359	0.989203	2.24572	1.55242	1.45992	0.0198688	0.0156376	0.0229618	0.0166776	0.0144754	0.0706549	0.0558927	0.0669406	0.0407009		1.1217	0.98623	0.484615	1.68196	3.35577	1.85421	1.85997	2.43378	1.24837	0.720674	0.839456	0.934629	0.654592
Nic_Ad_Dinuc_Ox_(NAD+)	9.61102	9.40568	9.9209	9.35775	7.82515	6.57466	6.30389	9.65669	0.614399	0.805087	1.32612	0.815155	0.852802	2.11573	1.95817	2.02089	1.9645		6.15514	7.77151	8.40963	7.24218	5.73982	5.85651	4.28397	8.12647	0.959562	0.570499	0.725096	0.624118	0.706447	2.20316	2.01469	2.09415	1.53617		0.640425	0.826257	0.847668	0.773923	0.73351	0.89077	0.679576	0.841537	1.56179	0.708618	0.546779	0.765643	0.828384
Pyruvate	0.0251126	0.0208143	0.0170298	0.0305112	0.0118346	0.0506889	0.059335	0.0730357	0.0333371	0.0164257	0.0202753	0.0112758	0.00900296	0.0057629	0.00855561	0.0101039	0.010279		0.029726	0.0276217	0.0531994	0.0414022	0.0697881	0.0820102	0.0275157	0.0904039	0.0270546	0.0422766	0.0294383	0.0104546	0.00784085	0.014022	0.0112813	0.0130515	0.0123361		1.18371	1.32705	3.1239	1.35695	5.89694	1.61791	0.463736	1.2378	0.811547	2.57382	1.45193	0.927177	0.87092
Adenosine_Monophosphate_(AMP)	0.626059	0.626059	0.626059	0.626059	1.52751	0.324577	0.267934	1.9604	1.12419	0.846698	1.61585	0.626059	1.15114	0.21277	0.094557	0.381911	0.397427		0.69588	0.69588	0.69588	0.69588	0.661845	0.92517	0.486526	1.62957	1.15076	1.31964	0.617612	1.17295	0.945363	0.171882	0.111992	0.157721	0.69588		1.11152	1.11152	1.11152	1.11152	0.433283	2.85039	1.81585	0.831242	1.02363	1.55858	0.38222	1.87355	0.821241
Fumarate	0.142429	0.192987	0.139402	0.181368	0.0184492	0.0813658	0.0988411	0.049179	0.0357985	0.0287472	0.0283026	0.0332438	0.0153063	0.0220722	0.00984928	0.0307907	0.0141007		0.243859	0.170733	0.170948	0.216893	0.0522384	0.0624694	0.0588381	0.105466	0.0261079	0.03694	0.0211037	0.0234703	0.0321221	0.0214749	0.0137973	0.0139161	0.0157593		1.71214	0.884691	1.22629	1.19587	2.83147	0.76776	0.59528	2.14453	0.7293	1.285	0.745643	0.706005	2.09861
Cytidine_Diphosphate_(CDP)	0.0144905	0.0245841	0.0298987	0.0252647	0.0182883	0.02635	0.0215824	0.0535295	0.0684543	0.0646601	0.0786936	0.0656887	0.0699457	0.0191194	0.0130611	0.0325019	0.0529516		0.0181252	0.0231261	0.0232785	0.0215055	0.0479743	0.0370034	0.0355871	0.0810216	0.0711781	0.0873206	0.0549316	0.0698193	0.050431	0.023614	0.0282662	0.0371984	0.0788635		1.25084	0.940697	0.778579	0.85121	2.62323	1.4043	1.64889	1.51359	1.03979	1.35046	0.698045	1.06288	0.721003
Isocitrate									7.08117	2.80459	6.63767	6.99233	7.61804	6.60648	7.27808	7.84045	8.61219										5.96718	10.873	6.80663	5.30671	4.05903	9.81794	7.66822	8.07891	8.59932										0.842682	3.87687	1.02546	0.758933	0.532817
Glutathione_oxidized_(GSSG)	3.62751	3.39956	2.20675	3.03119	1.3841	0.838982	0.931709	1.28721	2.70302	2.4963	3.50775	2.82245	2.29525	3.32038	2.56249	2.98317	2.75287		1.63677	2.28112	2.71033	2.39244	1.24687	1.15245	1.10289	1.5274	2.91313	2.62441	2.58615	2.44002	2.52056	3.50091	3.04593	3.4962	2.60461		0.451209	0.671005	1.2282	0.789272	0.900853	1.37363	1.18373	1.1866	1.07773	1.05132	0.737269	0.864503	1.09816
alpha-Ketoglutarate_(a-KG)	0.444081	0.217916	0.157908	0.166457	0.192187	0.615889	1.11989	0.162803	0.00530936	0.0208964	0.0288702	0.0737426	0.117167	0.454719	0.366972	0.327505	0.368818		0.37378	0.206044	0.663822	0.291925	1.08725	0.115799	0.348312	0.66288	0.0473983	0.0501441	0.275704	0.0577201	0.0832629	0.368578	0.376242	0.508737	0.215604		0.841693	0.945521	4.20386	1.75375	5.65726	0.18802	0.311023	4.07166	8.92731	2.39965	9.54981	0.782724	0.710634
Citrate	12.0466	16.5831	15.5821	13.8145	11.0246	13.9881	16.216	18.3721	1.128	0.378116	1.14455	0.990032	1.05152	0.913912	1.02127	1.07492	1.27834		13.6571	15.1188	11.5948	12.2628	13.2521	10.4356	11.4073	22.0825	0.863525	1.6811	0.948081	0.739919	0.582104	1.37924	1.10942	1.15185	1.21266		1.13369	0.911702	0.74411	0.887674	1.20205	0.746038	0.703462	1.20196	0.765535	4.44598	0.828344	0.747368	0.553582
Oxaloacetate	0.0777851	0.0855323	0.0867514	0.0830554	0.186004	0.191754	0.0933581	0.159087	0.0371356	0.0437845	0.0448622	0.0212377	0.0204883	0.0228232	0.0155614	0.0118165	0.0146082		0.0369789	0.072774	0.0866375	0.066753	0.175303	0.138049	0.161451	0.233112	0.0549697	0.0434242	0.028643	0.0259393	0.0236721	0.0237752	0.0161797	0.0192019	0.0314583		0.475398	0.850836	0.998687	0.803717	0.942464	0.719929	1.72938	1.46532	1.48024	0.991771	0.638467	1.22138	1.1554
2-Phosphoglycerate									0.928616	1.30886	1.64545	1.10076	0.499484	0.206864	0.235134	0.123818	0.432761										1.86934	0.645183	1.60092	0.773144	0.625401	0.265353	0.218567	0.250502	0.601251										2.01304	0.492936	0.972938	0.702373	1.25209
3-Phosphoglycerate	1.26738	1.20978	1.07161	1.05548	0.827561	1.56373	1.4608	0.723411	0.433368	0.629054	0.47023	0.426913	0.323421	0.0436796	0.0714809	0.0361836	0.0898288		1.12502	1.95655	2.53405	2.34452	1.62276	2.88946	1.7586	2.54383	0.806057	0.20895	0.654643	0.380649	0.31415	0.0572155	0.0616936	0.0433885	0.213251		0.887678	1.61728	2.36472	2.22128	1.96089	1.8478	1.20386	3.51644	1.85999	0.332165	1.39218	0.891631	0.971336
Aconitate	0.844585	0.960076	0.95959	0.95424	0.686235	0.868609	0.920116	1.12655	1.34197	1.81252	2.14127	2.13705	2.07389	1.21938	1.70185	1.94089	2.00711		0.901555	0.899934	0.779369	0.787551	0.771441	0.73763	0.772201	1.4047	2.09492	2.46924	2.46879	1.91793	1.5638	2.45412	2.10305	2.05789	2.1512		1.06745	0.937357	0.81219	0.825318	1.12416	0.849208	0.839243	1.24691	1.56107	1.36232	1.15295	0.897464	0.754043
Phosphoenolpyruvate	1.51895	1.46928	1.66746	2.12697	0.121924	0.809243	0.675064	0.600929	0.0119246	0.169646	0.0645933	0.0742011	0.0712436	0.0141335	0.0113987	0.0068309	0.019586		1.96391	2.11226	2.99826	2.35914	0.85747	1.57012	1.08523	1.4176	0.0839422	0.498022	0.138574	0.10886	0.123417	0.00615329	0.0080778	0.0133152	0.0275866		1.29293	1.43762	1.7981	1.10916	7.03285	1.94024	1.6076	2.35901	7.0394	2.93566	2.14533	1.46709	1.73232
Nic_Ad-Dinuc_Phos_Ox_(NADP+)	3.22875	2.55683	2.98441	3.18035	0.687784	2.07132	1.95197	2.08265	1.99881	1.4232	1.37645	1.41849	1.91159	0.988408	1.48745	1.67659	1.34353		3.36255	2.38032	2.34551	2.74231	1.89542	1.95107	1.58324	2.2407	1.57889	1.82354	1.1445	1.31267	0.977592	1.47987	1.6254	1.35548	1.6406		1.04144	0.930964	0.785919	0.862266	2.75583	0.941946	0.811099	1.07589	0.789915	1.28129	0.83149	0.925402	0.511402
Fructose-1,6-Bisphosphate	1.76365	1.43299	1.25203	1.42148	0.56007	1.40006	1.67008	1.41682	4.57539	0.759667	5.67595	1.33665	4.39585	2.7621	3.26196	6.45253	7.44557		1.57967	0.746921	0.98815	1.52392	1.17723	0.908685	1.20798	2.08562	5.64396	5.33977	2.62354	3.16298	1.46165	2.40142	2.90958	5.03039	7.8152		0.89568	0.521234	0.789239	1.07207	2.10194	0.649032	0.723307	1.47204	1.23355	7.02909	0.46222	2.36635	0.332506
Adenosine_Diphosphate_(ADP)	0.931965	1.55024	1.72458	0.884224	4.54201	3.10286	2.75781	5.19777	14.5753	15.0685	14.3903	13.4136	14.4438	3.12886	4.77939	5.63112	9.42391		0.953507	1.23584	2.03923	1.2752	3.80684	4.3767	3.97839	6.32748	15.4086	13.2067	12.8917	14.0664	13.5391	2.35494	4.54394	6.37413	12.9365		1.02312	0.797196	1.18245	1.44217	0.83814	1.41054	1.44259	1.21734	1.05717	0.876447	0.89586	1.04866	0.937365
UDP-N-Acetyl-Glucosamine	0.735093	0.625744	0.619265	0.543769	0.0699812	0.484954	0.414856	0.351143	3.52141	2.92007	3.91958	2.66325	2.65071	3.4368	2.86756	3.15552	2.89631		0.843798	0.893471	0.731973	1.0276	0.52655	0.442749	0.402006	0.65903	2.73229	4.01789	3.0747	3.17375	2.98743	3.13744	3.20783	3.36885	2.84692		1.14788	1.42785	1.182	1.88977	7.52417	0.912972	0.969024	1.87681	0.775906	1.37596	0.784446	1.19169	1.12703
UDP-Glucose	2.86287	2.6747	3.31626	4.37031	0.209778	1.14301	0.688101	0.906538	3.55512	2.62673	3.19746	1.89837	2.23569	4.47816	3.12995	2.82048	3.36179		5.26721	4.23605	2.66431	3.49747	1.37867	0.829373	0.946656	1.47574	2.83222	3.95741	3.30635	3.38385	2.25191	3.93089	3.93188	4.23315	3.17062		1.83984	1.58375	0.803409	0.800279	6.57207	0.725606	1.37575	1.62789	0.796658	1.50659	1.03406	1.7825	1.00725
Guanosine_Diphosphate_(GDP)	0.0169222	0.0279113	0.0246775	0.031056	0.121094	0.0542078	0.0371209	0.0985322	0.530065	0.468562	0.509186	0.414121	0.627861	0.0551437	0.12536	0.170916	0.251465		0.0164151	0.0272154	0.0415028	0.036504	0.104104	0.124108	0.0758175	0.139263	0.560277	0.650999	0.414966	0.568947	0.480038	0.0572529	0.139505	0.153309	0.349462		0.970032	0.975066	1.68181	1.17542	0.859691	2.28948	2.04245	1.41338	1.057	1.38936	0.81496	1.37387	0.764561
Cytidine_Triphosphate_(CTP)	0.258167	0.268818	0.336431	0.229433	0.619366	0.792646	0.690119	0.903534	0.0642609	0.0916737	0.145857	0.120006	0.0310861	0.553494	1.37327	0.561751	0.295717		0.450044	0.340335	0.186235	0.448683	0.976541	0.614845	0.587674	0.756606	0.0864647	0.045905	0.407517	0.0509731	0.0496888	0.428482	0.971796	0.235934	0.233726		1.74323	1.26604	0.55356	1.95562	1.57668	0.775687	0.851555	0.837385	1.34553	0.500744	2.79395	0.424756	1.59842
Flavin_Mononucleotide_(FMN)	0.0262645	0.0262645	0.0262645	0.0262645	0.0299782	0.0276392	0.0191931	0.0264865	0.0163847	0.0167518	0.0132485	0.0262645	0.0138687	0.0240116	0.0269823	0.0385965	0.0365343		0.0183255	0.0183255	0.0183255	0.0183255	0.0185791	0.0134004	0.0211425	0.0201368	0.012611	0.0143201	0.0183255	0.0178292	0.021393	0.0179886	0.017365	0.0297175	0.0282058		0.697729	0.697729	0.697729	0.697729	0.619754	0.484834	1.10157	0.760267	0.769682	0.854841	1.38322	0.678832	1.54254
UDP-Glucuronate	1.56819	1.65112	1.80328	0.956792	0.962993	0.887247	0.899112	1.20263	1.65006	1.496	1.97425	1.30667	1.55693	2.01094	1.84524	2.19608	1.85888		1.75381	1.20805	0.707568	1.40816	0.996605	0.571523	0.519	1.05115	1.72203	1.97506	1.66073	1.93789	1.82113	1.78001	1.91891	2.13983	1.93148		1.11836	0.731655	0.392378	1.47176	1.0349	0.644153	0.577237	0.87404	1.04362	1.32023	0.841198	1.48308	1.16969
Nic_Ad_Dinuc_Phos_Red_(NADPH)	0.0223391	0.021907	0.0220895	0.0173718	0.00578605	0.0176394	0.0137272	0.0168588	0.00295257	0.00316712	0.00206107	0.00376531	0.00278733	0.003542	0.00219999	0.00468607	0.00394988		0.0227223	0.0181042	0.0208311	0.0159261	0.0138907	0.0171006	0.0117942	0.0164329	0.00370782	0.00362191	0.00301661	0.00297757	0.00329237	0.00195128	0.00120592	0.00299078	0.00287779		1.01716	0.826413	0.943034	0.916776	2.40073	0.969457	0.859183	0.974741	1.25579	1.1436	1.46361	0.79079	1.18119
Guanosine_Triphosphate_(GTP)	0.374891	0.37069	0.414923	0.330083	0.961778	0.878737	0.908295	1.18006	0.340342	0.338343	0.378109	0.460247	0.250707	0.686805	0.7396	0.751532	0.854642		0.592656	0.47078	0.337098	0.733435	1.03106	0.924491	0.715902	1.11121	0.403275	0.329605	0.455935	0.226935	0.289541	0.645153	0.651862	0.748154	0.740731		1.58088	1.27001	0.812437	2.22197	1.07204	1.05207	0.788183	0.941651	1.18491	0.974174	1.20583	0.493072	1.1549
Adenosine_Triphosphate_(ATP)/10	3.63987	3.50047	3.6842	2.93245	2.4894	2.23098	2.20655	3.24389	3.80918	3.99401	3.49849	4.82818	3.35762	10.2065	10.9919	9.4255	10.5856		3.58137	3.27653	1.8346	2.83214	2.06304	2.42524	2.18474	2.60282	4.08024	3.1085	5.17562	3.49798	3.97469	10.5216	11.3349	10.6361	7.88635		0.983929	0.936023	0.497964	0.965793	0.82873	1.08708	0.990114	0.802376	1.07116	0.778291	1.47939	0.724492	1.18378
Flavin_Adenine_Dinucleotide_(FAD)									2.44528	2.6271	2.64655	2.76921	3.49088	2.52035	2.16149	2.88094	2.83962										2.79322	3.24656	2.16899	2.75934	2.72926	2.10576	2.00365	2.45008	3.15921										1.14229	1.23579	0.819555	0.996435	0.781826
Uridine_Triphosphate_(UTP)	0.91061	1.04728	1.94528	1.39795	4.17615	4.17746	4.00136	5.98518	3.66763	3.52755	4.4385	5.01921	2.24809	13.5658	24.0055	13.5602	13.8345		2.58421	1.90914	0.837108	2.78096	5.4543	3.60877	4.11336	5.42467	3.82569	2.67087	6.95302	2.37457	2.87486	21.8453	22.4818	19.8166	7.89034		2.83789	1.82295	0.430327	1.98931	1.30606	0.863867	1.02799	0.90635	1.0431	0.757145	1.56653	0.473096	1.2788
Octanoyl-Carnitine									0.000634208	0.000455709	0.000303527	0.000791915	9.84015e-05	0.000760464	0.000624089	0.00017846	0.000152922										0.000394013	0.0007225	0.000151493	0.000631229	0.000781723	0.000539959	0.000324864	0.00122111	0.00135185										0.621267	1.58544	0.499108	0.797092	7.94422
Coenzyme-A_(CoA)	0.372738	1.26986	1.32881	0.884491	0.223604	0.0274866	0.0205523	0.0377737	0.493539	0.658195	0.677235	0.534428	0.344033	0.984123	0.811261	0.634534	0.813629		1.32138	0.573659	0.39949	0.868696	0.0524096	0.0350276	0.0213857	0.0347991	0.981008	0.498115	0.482205	0.605873	0.45774	0.962324	0.799425	0.820031	0.646741		3.54507	0.451751	0.300637	0.982143	0.234386	1.27435	1.04055	0.921254	1.9877	0.756788	0.71202	1.13369	1.33051
Acetyl-CoA	0.534699	0.545279	0.552025	0.469584	0.598463	0.0682394	0.0423486	0.292246	0.695455	0.630317	0.874394	0.533746	0.343054	0.63555	0.281281	0.286195	0.463091		0.137	0.181573	0.300212	0.208017	0.18951	0.193028	0.0383392	0.119447	0.819812	0.496592	1.11482	1.04452	1.27513	0.743443	0.315687	0.358467	0.357281		0.25622	0.332991	0.543837	0.442982	0.316661	2.82868	0.905324	0.408721	1.17881	0.787845	1.27496	1.95696	3.717
Succinyl-CoA									0.0258766	0.0455039	0.0129043	0.0105134	0.00654206	0.380916	0.361733	0.273773	0.541778										0.0425321	0.0130253	0.00645483	0.00851681	0.00866705	0.630748	0.44124	0.576884	0.216933										1.64365	0.286245	0.500206	0.810089	1.32482
Propanoyl-CoA	0.00378958	0.00524222	0.00417401	0.00389414	0.00716601	0.00109847	0.00411094	0.00367226	0.0332587	0.0276503	0.00829179	0.0129022	0.0143398	0.0310285	0.0544926	0.0452734	0.0500574		0.00221433	0.00218222	0.00288456	0.00109169	0.0055434	0.00300201	0.0016032	0.00242284	0.0272913	0.00863936	0.0156268	0.0137413	0.0152548	0.0526793	0.0567439	0.0558474	0.0504589		0.584321	0.416279	0.691076	0.280341	0.773569	2.7329	0.389982	0.659767	0.820576	0.312451	1.88461	1.06503	1.06381
Acetylphosphate	0.000663804	0.0123656	0.0137899	0.0101112	0.0016916	0.00152211	0.00205616	0.00173868											0.00559555	0.00901372	0.00653089	0.00523137	0.00153193	0.00177824	0.00236046	0.00170049											8.42953	0.728938	0.473601	0.517384	0.905614	1.16827	1.14799	0.978037
Aalantoin	0.00352607	0.00291556	0.00227971	0.00390467	0.0108665	0.00642954	0.00794362	0.0125619											0.00532827	0.00354224	0.00520781	0.00403108	0.00439238	0.00983938	0.00709226	0.00985258											1.51111	1.21494	2.28442	1.03237	0.404211	1.53034	0.892825	0.784321
Glycerol-3-phosphate	0.460453	0.400588	0.267895	0.28733	0.741086	0.531763	0.993889	1.3751											0.376515	0.326246	0.517954	0.4027	0.492663	0.60713	0.499301	0.819466											0.817705	0.814417	1.93342	1.40152	0.664785	1.14173	0.50237	0.595931
Shikimate	0.111985	0.0803636	0.0863325	0.043088	0.168622	0.0619009	0.0820559	0.0922298											0.0939946	0.0757776	0.0828958	0.0699202	0.227388	0.110855	0.0766167	0.100846											0.839349	0.942934	0.960192	1.62273	1.34851	1.79085	0.933714	1.09343
N-Carbamoyl-L-aspartate	0.238703	0.273068	0.166774	0.321115	0.204783	0.212142	0.175453	0.25322											0.215662	0.332801	0.335224	0.252486	0.0716112	0.14585	0.142809	0.233422											0.903473	1.21875	2.01005	0.786279	0.349692	0.68751	0.813947	0.921816
1,3-Di-P-Glycerate	2.46709	3.61625	3.07822	3.09777	0.514493	1.61694	1.63501	1.57945											5.46227	3.50184	2.53268	5.27454	1.40893	1.67892	1.52958	0.834733											2.21405	0.968362	0.822775	1.70269	2.73849	1.03833	0.935519	0.528495
6-Phospho-D-gluconate	0.0595992	0.0492156	0.0264708	0.0528824	0.0492156	0.0448421	0.051724	0.0122827											0.0503358	0.111814	0.113855	0.123804	0.0587275	0.0583469	0.0377171	0.0616127											0.844571	2.27192	4.30113	2.34112	1.19327	1.30116	0.7292	5.01621
N-Acetyl-Glucosamine-1-P	0.028211	0.0239019	0.0152359	0.0137553	0.0274733	0.0178196	0.0393913	0.0336428											0.0120945	0.0132784	0.018777	0.0110563	0.042934	0.0187557	0.0194602	0.0313478											0.428714	0.555538	1.23241	0.803782	1.56275	1.05253	0.494022	0.931782
AICAR	0.0255214	0.0339539	0.0297975	0.0297645	0.0295693	0.0181312	0.0110503	0.0212652											0.0194968	0.0264897	0.0386813	0.0289776	0.0113884	0.0156881	0.0112062	0.018612											0.763941	0.780168	1.29814	0.973563	0.385143	0.865253	1.01411	0.875232
IMP	0.106642	0.0973219	0.160655	0.0917641	0.597091	0.160655	0.270531	0.601547											0.0671705	0.108	0.478575	0.196561	0.695974	0.380045	0.2316	1.04448											0.629867	1.10972	2.9789	2.14202	1.16561	2.3656	0.856096	1.73633
5-P-Ribosyl-1-Pyro-P	0.0862294	0.102181	0.0866188	0.0901135	0.0989171	0.066527	0.062157	0.0899644											0.0960095	0.0770031	0.0724501	0.0782462	0.0469541	0.0638893	0.0444027	0.0843304											1.11342	0.753598	0.836425	0.868308	0.474682	0.960351	0.714364	0.937375
UDP	0.0345859	0.068141	0.0695236	0.062097	0.19889	0.180345	0.158446	0.402569											0.0417693	0.0616739	0.0631955	0.048565	0.355328	0.318916	0.253306	0.560082											1.2077	0.905092	0.90898	0.782082	1.78655	1.76836	1.59869	1.39127
dATP	0.017561	0.0171367	0.0235597	0.0106954	0.0248396	0.02384	0.0162083	0.0308088											0.0228718	0.0148742	0.0137291	0.0205164	0.0206305	0.013169	0.0168571	0.0235272											1.30242	0.86797	0.582738	1.91825	0.830551	0.55239	1.04003	0.76365
Adenosine-5'-P-Sulfate	0.0680525	0.0970597	0.111586	0.048271	0.287618	0.190181	0.176749	0.360121											0.0637713	0.080417	0.130844	0.0802092	0.252994	0.252041	0.252533	0.382596											0.937089	0.828531	1.17259	1.66165	0.879618	1.32527	1.42876	1.06241
ADP-D-glucose	0.0135327	0.0167238	0.0139688	0.00809007	0.00714729	0.00706663	0.0085611	0.00768141											0.00862338	0.00500394	0.00511534	0.00541005	0.0169499	0.0101172	0.00802696	0.0261957											0.637227	0.299211	0.366197	0.668728	2.37151	1.43169	0.937608	3.41027
Dehydro-D-gluconate	0.0260249	0.0210138	0.0162022	0.019617	0.00791933	0.0146524	0.0168487	0.0245741											0.0179669	0.0175421	0.0219112	0.0196966	0.0126989	0.0159955	0.0149766	0.0197273											0.690372	0.834789	1.35236	1.00406	1.60354	1.09166	0.888889	0.802766
[truncated: 10 more columns]

## Sheet: 13C-Flux
Fractional saturation of cardiac glycolytic metabolites with 13C after 5 min. of [U-13C] glucose. Figure 3C
		KO1	KO2	KO3	KO4	KO5	Av	SE		WT1	WT2	WT3	WT4	WT5	Av	SE	P (unpaired)
	Hexose-P	0.786593	0.746561	0.791941	0.710535	0.771159	0.761358	0.0149501		0.68564	0.786814	0.860842	0.480501	0.463743	0.655508	0.0799102	0.229145
	Fructose-1,6-Bis-P	0.916572	0.893091	0.892936	0.88451	0.843147	0.886051	0.0119825		0.806866	0.838934		0.793891	0.620066	0.764939	0.0492099	0.0318538
	2/3-P-glycerate	0.85993	0.792573	0.84881	0.861636	0.810977	0.834785	0.0139617		0.72605	0.680981	0.782755	0.726373	0.528861	0.689004	0.0431674	0.0123642
	P-enol-pyruvate	0.854273	0.788599	0.820094	0.816247	0.799774	0.815798	0.0111704		0.758447	0.633191	0.752692	0.709757	0.551342	0.681086	0.0394092	0.0110431
	Lactate	0.91484	0.88069	0.839511	0.844682	0.903177	0.87658	0.0151324		0.967555	0.867946	0.899793	0.888767	0.851745	0.895161	0.0199109	0.478739
	UDP-N-Acetyl-Glucosamine_M	0.105191	0.102875	0.102919	0.101939	0.109661	0.104517	0.00139314		0.0950368	0.0905664	0.10297	0.0897478	0.104386	0.0965414	0.00305762	0.0449848

## Sheet: WB Quant
Densitometric quantitation of western blots. Protein of interest relative to Ponceau S.
	Fig. 3F	Anti-MGO
		WT Cyto	KO Cyto	WT Mito	KO Mito
		0.77338	5.56001	0.7393	3.16437
		1.80705	5.56524	0.976351	3.72498
		2.27614	5.81948	1.6885	3.45164
		3.42881	3.56785	3.21468	5.90719
		3.68626	4.18602	3.22621	4.53485
		2.6966	3.62909	3.15753	2.84127
		2.30451	2.42991	1.74297	3.83047
		2.61563	3.34064
	Ave	2.44855	4.26228	2.10651	3.92211
	SE	0.323222	0.441238	0.409408	0.388127
	P	0.0298931		0.00417978
