# Supplementary material for: ALKBH7 mediates necrosis via rewiring of glyoxal metabolism
Source: eLife journal article supplement (doi:10.7554/elife.58573), 2020-08-14
Supplement: supp [file elife-58573-supp-v1.zip › elife_poa_e58573_Source_data_4.xlsx]

## Sheet: Heart Perfusion
	Cardiac function data for IR injury experiments
	Pre-Isch' time set at 10 min. Then 25 min. Isch', so zero reperfusion = 35 min.
	RPP = Heart Rate (bpm) x LV developed pressure (mmHg)
			RPP									RPP %
	Fig. 4A		10	35	45	55	65	75	85	95		10	35	45	55	65	75	85	95
	Young Male	WT1	71054.5	0	216.852	2448.19	3232.94	4226.24	5308.29	5100.34		100	0	0.305191	3.44551	4.54994	5.94789	7.47072	7.17807
		WT2	75970.3	0	114.091	381.357	1694.71	5295.71	5544.4	5638.66		100	0	0.150178	0.501982	2.23076	6.97077	7.29811	7.42219
		WT3	62790.3	0	184.893	924.771	2138.41	2411.93	2874.45	2761.41		100	0	0.294461	1.47279	3.40564	3.84126	4.57787	4.39784
		WT4	52255.1	0	656.669	871.473	695.391	1044.98	1918.25	1285.23		100	0	1.25666	1.66773	1.33076	1.99976	3.67093	2.45954
		WT5	47215.3	0	705.528	671.031	1372.92	2143.97	6035.83	5582.99		100	0	1.49428	1.42121	2.90778	4.54084	12.7836	11.8245
		WT6	52344.8	0	706.71	1510.47	3526.87	4064.95	4111.25	372.816		100	0	1.3501	2.88561	6.73777	7.76572	7.85417	0.712231
		WT7	57721.6	0	163.602	1657.64	3396.28	4260.86	4572.11	5608.98		100	0	0.283433	2.87178	5.8839	7.38174	7.92097	9.71731
		WT8	38236	0	87.2347	251.03	2186.39	2145.06	1493.35	4783.03		100	0	0.228148	0.656528	5.71814	5.61006	3.90563	12.5092
		WT9	24686.3	0	328.974	3744.71	4388.18	4051.53	3752.65	3775.78		100	0	1.33262	15.1692	17.7758	16.4121	15.2013	15.295
		WT10	29362.5	0	2357.47	7613.27	10858.3	12843.6	13209.4	12461.8		100	0	8.02885	25.9286	36.9802	43.7415	44.9871	42.4411
		WT11	53280	0	384	360	1350	1620	756	648		100	0	0.720721	0.675676	2.53378	3.04054	1.41892	1.21622
		WT12	47619	0	972	966	4806	4800	5340	4620		100	0	2.0412	2.0286	10.0926	10.08	11.214	9.70201
		WT13	41112	0	1872	1656	3480	5700	6660	6696		100	0	4.55342	4.02802	8.46468	13.8646	16.1996	16.2872
		WT14	40491	0	3000	4464	4368	3960	5130	5676		100	0	7.40905	11.0247	10.7876	9.77995	12.6695	14.0179
		WT15	54576	0	1080	5928	13734	15414	15330	15330		100	0	1.97889	10.8619	25.1649	28.2432	28.0893	28.0893
		WT16	38940	0	6450	12852	12432	13944	10920	15288		100	0	16.5639	33.0046	31.926	35.8089	28.0431	39.2604
		AV	49228.4	0	1205	2893.75	4603.77	5495.43	5809.75	5976.81		100	0	2.99945	7.35277	11.0306	12.8143	13.3316	13.9081
		SE	3466.49	0	410.061	854.762	1013.14	1119.4	1020.34	1151.59		0	0	1.09327	2.43508	2.77322	3.09816	2.87517	3.12997
		KO1	91486.6	0	0	3262.47	3228.41	3477.25	5411.88	5541.36		100	0	0	3.56607	3.52883	3.80083	5.91549	6.05702
		KO2	62763.3	0	325.094	637.009	1960.06	7179.2	7324.66	7233.85		100	0	0.517968	1.01494	3.12294	11.4385	11.6703	11.5256
		KO3	52804	0	6652.88	27301.4	29898	35776.2	34082.2	33815.7		100	0	12.5992	51.7032	56.6208	67.7528	64.5447	64.04
		KO4	73126.5	0	2149.32	1779.9	2555.87	3430.78	4516.08	6170.31		100	0	2.93918	2.43399	3.49513	4.69157	6.17571	8.43786
		KO5	86082.1	0	10737.8	18343.3	35699	29889.1	37002.2	37012.6		100	0	12.4739	21.3091	41.4709	34.7216	42.9847	42.9969
		KO6	49804.1	0	22951.5	34423.7	33024	37077.3	37623.2	40076.2		100	0	46.0836	69.1181	66.3077	74.4462	75.5424	80.4676
		KO7	68294.5	0	6860.29	28047.5	27996	25683.8	28421.4	26655.4		100	0	10.0452	41.0685	40.993	37.6074	41.616	39.0302
		KO8	52698.3	0	2548.82	11685.4	21507.6	17218.9	14587.4	19735.3		100	0	4.83663	22.1742	40.8127	32.6744	27.6809	37.4497
		KO9	51898.1	0	14760.6	16969.4	8658.42	5532.91	10160	11364.1		100	0	28.4414	32.6975	16.6835	10.6611	19.5768	21.8969
		KO10	28267.8	0	13941.6	15669.8	20091.7	19255.1	20961.5	16203.8		100	0	49.3199	55.4334	71.0764	68.1166	74.1533	57.3225
		KO11	42126	0	2376	8106	7686	6660	8736	8106		100	0	5.64022	19.2423	18.2453	15.8097	20.7378	19.2423
		KO12	56196	0	3528	17532	14820	21150	14280	16848		100	0	6.27803	31.198	26.372	37.6361	25.4111	29.9808
		KO13	49896	0	16269	29790	33693	36216	29040	34236		100	0	32.6058	59.7042	67.5265	72.583	58.2011	68.6147
		KO14	56826	0	3648	19056	21984	20706	20664	19656		100	0	6.4196	33.5339	38.6865	36.4375	36.3636	34.5898
		KO15	52206	0	22890	31584	35070	36876	32904	31356		100	0	43.8455	60.4988	67.1762	70.6356	63.0272	60.0621
		KO16	56736	0	34608	35868	32796	39942	39144	35364		100	0	60.9983	63.2191	57.8046	70.3997	68.9932	62.3308	P
		AV	58200.7	0	10265.4	18753.5	20666.8	21629.4	21553.7	21835.9		100	0	20.1903	35.4947	38.7452	40.5883	40.1621	40.2528	0.000389749
		SE	3909.26	0	2490.43	2899.99	3144.81	3343.44	3126.03	3058.64		0	0	5.04523	5.69212	6.10772	6.64279	6.13044	5.80887
	Fig 4 - Suppl 1 A		RPP									RPP %
	Young Female		10	35	45	55	65	75	85	95		10	35	45	55	65	75	85	95
		WT1	32328	0	420	864	1440	918	1368	1440		100	0	1.29918	2.67261	4.45434	2.83964	4.23163	4.45434
		WT2	41976	0	5640	630	1260	3570	4032	4320		100	0	13.4362	1.50086	3.00172	8.50486	9.60549	10.2916
		WT3	41088	0	1968	5250	5586	3432	5490	7280		100	0	4.78972	12.7775	13.5952	8.3528	13.3616	17.7181
		WT4	36708	0	1680	6972	6888	6930	6762	6972		100	0	4.57666	18.9931	18.7643	18.8787	18.4211	18.9931
		AV	38025	0	2427	3429	3793.5	3712.5	4413	5003		100	0	6.02545	8.98601	9.95389	9.64401	11.4049	12.8643
		SE	2220.79	0	1122.5	1588.57	1436.04	1233.58	1158.12	1360.86		0	0	2.59621	4.18732	3.75788	3.34843	2.99651	3.39691
		KO1	44730	0	1872	3402	6012	4896	2508	5124		100	0	4.18511	7.60563	13.4406	10.9457	5.60698	11.4554
		KO2	35322	0	2184	2646	3420	4212	3744	4368		100	0	6.18312	7.49108	9.68235	11.9246	10.5996	12.3662
		KO3	37764	0	1530	2160	1764	2982	3360	4272		100	0	4.05148	5.71973	4.67112	7.89641	8.89736	11.3124
		KO4	30720	0	1632	8520	9480	10800	8136	10290		100	0	5.3125	27.7344	30.8594	35.1562	26.4844	33.4961
		AV	37134	0	1804.5	4182	5169	5722.5	4437	6013.5		100	0	4.93305	12.1377	14.6634	16.4807	12.8971	17.1575	0.528727
		SE	2922.88	0	145.397	1468.4	1681.97	1738.2	1259.76	1438.17		0	0	0.50359	5.21678	5.68962	6.28398	4.64611	5.45119
	Fig 4 Suppl 2 A		RPP									RPP %
	Old Male		10	35	45	55	65	75	85	95		10	35	45	55	65	75	85	95
		WT1	40536	0	6012	10920	14796	13950	14880	17208		100	0	14.8313	26.939	36.5009	34.4139	36.7081	42.4512
		WT2	59724	0	3120	480	1020	1404	1116	2088		100	0	5.22403	0.803697	1.70786	2.35081	1.8686	3.49608
		WT3	48384	0	2268	3510	4272	2808	4428	2736		100	0	4.6875	7.25446	8.82937	5.80357	9.15179	5.65476
		AV	49548	0	3800	4970	6696	6054	6808	7344		100	0	8.2476	11.6657	15.6794	14.1894	15.9095	17.2007
		SE	5569.59	0	1133.02	3100.92	4157.38	3968.75	4147.7	4935.55		0	0	3.29547	7.86041	10.6118	10.1612	10.6097	12.6406
		KO1	55566	0	198	1440	2088	3030	4212	3948		100	0	0.356333	2.59151	3.75769	5.45297	7.58017	7.10506
		KO2	45828	0	3768	9492	6510	11340	12432	14196		100	0	8.22205	20.7122	14.2053	24.7447	27.1275	30.9767
		KO3	44580	0	144	378	414	1488	1908	2736		100	0	0.323015	0.847914	0.928668	3.33782	4.27995	6.13728
		KO4	38070	0	90	2394	5448	6594	9660	9780		100	0	0.236407	6.28842	14.3105	17.3207	25.3743	25.6895
		KO5	65280	0	2184	3024	5904	14436	16002	9180		100	0	3.34559	4.63235	9.04412	22.114	24.5129	14.0625	P
		AV	49864.8	0	1276.8	3345.6	4072.8	7377.6	8842.8	7968		100	0	2.49668	7.01448	8.44925	14.594	17.775	16.7942	0.967639
		SE	4761.69	0	737.72	1600.39	1193.96	2446.68	2591.72	2086.56		0	0	1.54782	3.54555	2.70564	4.34328	4.88195	4.97585

## Sheet: Infarcts
	Cardiac infarct data from post IR TTC staining
	Fig 4B		Infarct	Live	Infarct %	X-Axis
	Male Young	WT1	12558	15569.8	44.6463	1
		WT2	24068	5366.5	81.768	1
		WT3	19819.8	6300.83	75.878	1.1
		WT4	17296.5	7180.17	70.6653	1.1
		WT5	16518.5	10401.2	61.3622	1
		WT6	20135.5	15175.8	57.0229	0.9
		WT7	13612.5	13704.2	49.8322	0.9
		WT8	9349.5	20372.8	31.4562	1
		WT9	15212.8	14657.2	50.9301	1
		WT10	198276	66054	75.0108	0.9
		WT11	194376	103898	65.1669	1
		WT12	144469	59761	70.7384	0.9
		WT13	160178	161511	49.7928	1.1
		WT14	140324	102664	57.7494	1.1
				AV	60.1442	2
				SE	3.75254
		KO1	15082.8	7691.75	66.2265	3
		KO2	13047.3	12718.7	50.6378	3
		KO3	1392.17	24272.7	5.42441	2.9
		KO4	20408.8	8987	69.4276	3
		KO5	5377.67	17358.3	23.6527	3
		KO6	4731.25	26136	15.3277	3
		KO7	6653.5	27906.8	19.2519	3.1
		KO8	6822.5	23584.2	22.4375	3.1
		KO9	1486.14	22560.9	6.18016	3.1
		KO10	51615	144573	26.3089	3
		KO11	64990	149856	30.2496	3
		KO12	38414	152535	20.1174	3	P
		KO13	60948	235440	20.5636	2.9	9.49664e-05
				AV	28.9081	4
				SE	5.705
	Fig 4 Suppl 1 B		Infarct	Live	Infarct %	X-Axis
	Young Female	WT1	137942	49996	73.3976	1
		WT2	81354	127286	38.9925	1
		WT3	115950	111847	50.9006	1
		WT4	125129	68747	64.5407	1
				AV	56.9579	2
				SE	7.56753
		KO1	39977	159337	20.0573	3
		KO2	134097	36607	78.5553	3
		KO3	134353	64227	67.6569	3
		KO4	134697	93814	58.9455	3	P
				AV	56.3037	4	0.966204
				SE	12.7306
	Fig 4 Suppl 2 B		Infarct	Live	Infarct %	X-Axis
	Old Male	WT1	231163	71243	76.4413	1
		WT2	227130	89220	71.7971	1
		WT3	258705	63407	80.3152	1
				AV	76.1845	2
				SE	2.46233
		KO1	241670	121323	66.577	3
		KO2	221814	95580	69.886	3
		KO3	244599	49908	83.0537	3
		KO4	143634	36948	79.5395	3
		KO5	150382	68053	68.8452	3	P
				AV	73.5803	4	0.598274
				SE	3.24324

## Sheet: WB Quant
Densitometric quantitation of western blots. Protein of interest relative to Ponceau S.
	Fig 4 Suppl 1 D	Anti-GLO-1 (female)
		WT	KO
		0.167189	0.36009
		0.248656	0.288196
		0.135486	0.278513
		0.36198	0.870537
		0.232896	0.725014
		0.318879	0.848487
	Ave	0.244181	0.561806
	SE	0.0352827	0.115462
	P	0.0157557
	Fig 4 Suppl 1 F/G	Anti-MGO(female)
		WT Cyto	KO Cyto	WT Mito	KO Mito
		3.1301	3.5314
		3.62724	3.26078
		3.01238	3.65478
	new	6.41664	4.10213	4.42067	2.59628
		5.02716	5.48016	3.61279	3.19682
		6.51367	3.58629	4.31068	1.56118
	Ave	4.6212	3.93592	4.11472	2.45143
	SE	0.652418	0.328281	0.252962	0.47769
	P	0.328444		0.133781

## Sheet: Enzymes
Enzyme Activity Assays
HEART
Figure	Enzyme	Source	Units	WT1	KO1	WT2	KO2	WT3	KO3	WT4	KO4	WT5	KO5			WT	KO	P
																				GLO1-1 Fem
Fig 4 Suppl 1 E	GLO1 Female	Cytosol	umol/min/mg	0.517036		0.64566		0.601123							Av	0.58794	1.3424
					1.37139		1.31692		1.3389						SE	0.0377111	0.0158218	0.00499254
