# Supplementary material for: ALKBH7 mediates necrosis via rewiring of glyoxal metabolism
Source: eLife journal article supplement (doi:10.7554/elife.58573), 2020-08-14
Supplement: supp [file elife-58573-supp-v1.zip › elife_poa_e58573_Source_data_5.xlsx]

## Sheet: PT Pore
WT vs. ALKBH7 KO Heart Mitochondria, Calcum induced swelling, Abs @ 540nm in spectrophotometer (Figure 5A/B)
Calcium added at 5 min. Absorbance @ 520nm.
Calculations at bottom of sheet, average traces over on right -->
																																	Averages
	Run 1					Run2					Run3				Run4					Run5			Run6					Run7
	WT	WT	KO	KO		WT	WT	KO	KO		WT	KO	KO		WT	WT	KO	KO		WT	KO		WT	WT	KO	KO		WT	WT	KO	KO		WT	WT	KO	KO
Time (min)	Ca	Ca+CsA	Ca	Ca+CsA		Ca	Ca+CsA	Ca	Ca+CsA		Ca	Ca	Ca+CsA		Ca	Ca+CsA	Ca	Ca+CsA		Ca	Ca		Ca	Ca+CsA	Ca	Ca+CsA		Ca	Ca+CsA	Ca	Ca+CsA		Ca	Ca+CsA	Ca	Ca+CsA
0	0.8454	0.8396	0.8486	0.8391		0.8245	0.8309	0.8576	0.8494		0.826	0.8373	0.8288		0.9466	0.9485	0.917	0.9156		0.7169	0.7134		0.7317	0.7201	0.7331	0.7215		0.5949	0.5885	0.6214	0.6104		0.783714	0.78552	0.789771	0.794133
0.26	0.845	0.8389	0.8462	0.8397		0.8227	0.8306	0.8575	0.8481		0.8228	0.8343	0.8271		0.9463	0.9496	0.9166	0.9158		0.7142	0.7092		0.7322	0.7212	0.7333	0.7204		0.5929	0.5868	0.6237	0.6098		0.7823	0.78542	0.788686	0.793483
0.52	0.8446	0.8384	0.8463	0.8382		0.8209	0.8301	0.856	0.848		0.8221	0.8341	0.8256		0.946	0.95	0.917	0.9168		0.713	0.7083		0.7316	0.7211	0.7336	0.72		0.5908	0.5832	0.6209	0.6068		0.781286	0.78456	0.788029	0.792567
0.78	0.8447	0.8381	0.8462	0.8367		0.8191	0.8279	0.8569	0.8471		0.8197	0.8365	0.8235		0.9456	0.95	0.9173	0.9176		0.71	0.7053		0.7319	0.7204	0.7345	0.7192		0.5905	0.5817	0.6197	0.6024		0.780214	0.78362	0.788057	0.791083
1.04	0.8446	0.8376	0.8481	0.8362		0.8193	0.8276	0.853	0.8465		0.8181	0.8356	0.8233		0.9459	0.9494	0.9173	0.9167		0.71	0.7041		0.7326	0.7194	0.7355	0.7192		0.5898	0.5804	0.6187	0.6013		0.780043	0.78288	0.787471	0.790533
1.3	0.8434	0.8369	0.8476	0.8358		0.8199	0.8276	0.8539	0.8438		0.817	0.8311	0.8211		0.9466	0.9503	0.9202	0.9154		0.7101	0.7016		0.7331	0.7193	0.735	0.7192		0.5891	0.5777	0.6184	0.5994		0.779886	0.78236	0.786829	0.789117
1.56	0.8433	0.8368	0.8476	0.8355		0.8182	0.8269	0.8488	0.8426		0.8152	0.8314	0.8199		0.9452	0.949	0.9154	0.9149		0.7068	0.7003		0.7333	0.7189	0.7357	0.7193		0.5889	0.5761	0.6216	0.5985		0.7787	0.78154	0.785829	0.78845
1.82	0.843	0.8363	0.8475	0.8345		0.8171	0.8273	0.8477	0.8416		0.8139	0.8285	0.8196		0.9455	0.9482	0.9147	0.913		0.7063	0.6981		0.7333	0.7184	0.7361	0.7195		0.5892	0.5759	0.6224	0.5973		0.778329	0.78122	0.785	0.787583
2.08	0.8428	0.8362	0.8476	0.8339		0.8164	0.8248	0.8493	0.8396		0.8127	0.8249	0.8196		0.9451	0.9489	0.9135	0.914		0.7051	0.6965		0.7333	0.718	0.7363	0.7194		0.5876	0.5747	0.6158	0.5967		0.777571	0.78052	0.783414	0.7872
2.34	0.8429	0.8358	0.8474	0.8337		0.815	0.8246	0.8502	0.8386		0.8113	0.8232	0.8197		0.9419	0.9488	0.9181	0.913		0.7036	0.6956		0.7336	0.7178	0.7363	0.7188		0.5861	0.5722	0.6135	0.5957		0.776343	0.77984	0.783471	0.786583
2.6	0.8431	0.8355	0.8468	0.8334		0.8145	0.8255	0.8476	0.8413		0.8117	0.82	0.8192		0.9378	0.9455	0.9129	0.9143		0.7031	0.6949		0.7338	0.7176	0.7364	0.7185		0.5861	0.5714	0.6133	0.5936		0.775729	0.7791	0.7817	0.786717
2.86	0.8432	0.8357	0.8458	0.8337		0.8129	0.8255	0.8444	0.8371		0.8111	0.8188	0.8184		0.935	0.9433	0.9133	0.9135		0.7023	0.6935		0.7341	0.7172	0.7368	0.7189		0.5862	0.5701	0.6138	0.5923		0.774971	0.77836	0.780914	0.78565
3.12	0.8432	0.8359	0.8452	0.8333		0.8136	0.8232	0.8441	0.8356		0.81	0.8174	0.8179		0.9323	0.9421	0.9108	0.9125		0.7016	0.6926		0.7344	0.717	0.7373	0.7185		0.5856	0.569	0.6131	0.5918		0.774386	0.77744	0.780071	0.784933
3.38	0.8432	0.8352	0.8448	0.8338		0.8121	0.8204	0.8443	0.8359		0.8089	0.8155	0.8173		0.9299	0.9382	0.9087	0.9102		0.7012	0.6918		0.7345	0.7179	0.7373	0.7181		0.5841	0.5678	0.6142	0.5904		0.773414	0.7759	0.779514	0.784283
3.64	0.8434	0.8358	0.8448	0.8331		0.8094	0.8172	0.8433	0.835		0.8076	0.8141	0.8163		0.9291	0.937	0.9054	0.9074		0.7007	0.6923		0.7345	0.7183	0.7374	0.7183		0.5839	0.568	0.6145	0.5901		0.772657	0.77526	0.778829	0.783367
3.9	0.8432	0.8363	0.8453	0.8329		0.8057	0.8164	0.8432	0.8335		0.8062	0.8128	0.8155		0.9265	0.9356	0.9028	0.9046		0.7	0.69		0.7343	0.7162	0.738	0.7182		0.5833	0.5668	0.6141	0.5893		0.771314	0.77426	0.778029	0.782333
4.16	0.8431	0.836	0.8452	0.8315		0.8036	0.8128	0.8416	0.8314		0.8049	0.8112	0.8147		0.9256	0.9348	0.901	0.9029		0.6994	0.6888		0.7347	0.7161	0.7382	0.718		0.5824	0.5665	0.6142	0.5886		0.770529	0.77324	0.777171	0.781183
4.42	0.8427	0.8348	0.8447	0.8313		0.8029	0.8107	0.8401	0.8304		0.8046	0.8093	0.8141		0.9248	0.9334	0.9002	0.9013		0.6985	0.6887		0.7345	0.7157	0.7382	0.718		0.5836	0.5655	0.614	0.5881		0.770229	0.77202	0.776457	0.780533
4.68	0.8425	0.8344	0.8394	0.8289		0.8005	0.8092	0.839	0.831		0.8031	0.8081	0.8136		0.9242	0.9328	0.898	0.8998		0.6994	0.6883		0.7345	0.7154	0.7385	0.718		0.5822	0.5654	0.6127	0.5884		0.769486	0.77144	0.774857	0.77995
4.94	0.8404	0.8314	0.8358	0.8256		0.7992	0.8068	0.8377	0.8305		0.8028	0.8065	0.8124		0.9228	0.9311	0.8977	0.8994		0.6997	0.6875		0.735	0.7153	0.7389	0.7182		0.5822	0.5662	0.6129	0.5881		0.768871	0.77016	0.773857	0.779033
5.2
5.46	0.8596	0.8664	0.8676	0.8623		0.8144	0.8178	0.8499	0.8347		0.7829	0.7702	0.782		0.9384	0.9436	0.9171	0.9206		0.6893	0.6839		0.7487	0.7468	0.7466	0.7604		0.5729	0.5542	0.6069	0.5828		0.772314	0.78576	0.777457	0.790467
5.72	0.8647	0.8725	0.8666	0.8627		0.8171	0.8222	0.8465	0.8388		0.7683	0.7653	0.7805		0.9415	0.947	0.9226	0.926		0.6959	0.689		0.7517	0.7462	0.7467	0.7644		0.576	0.5611	0.6088	0.589		0.7736	0.7898	0.777929	0.793567
5.98	0.8507	0.8591	0.855	0.8634		0.8141	0.8251	0.8477	0.8413		0.7587	0.7811	0.7795		0.938	0.9466	0.9264	0.9322		0.6932	0.6913		0.7525	0.7513	0.7472	0.766		0.5783	0.5635	0.6097	0.5919		0.769357	0.78912	0.779771	0.795717
6.24	0.8348	0.8469	0.8408	0.8483		0.8092	0.8277	0.8501	0.844		0.7498	0.7844	0.778		0.9312	0.9464	0.9264	0.9327		0.6968	0.6962		0.7482	0.7553	0.7464	0.7675		0.5791	0.5648	0.6109	0.5946		0.764157	0.78822	0.779314	0.794183
6.5	0.8242	0.8394	0.8214	0.8376		0.8031	0.8302	0.8432	0.8425		0.7445	0.7843	0.7779		0.9216	0.9474	0.9149	0.9338		0.6989	0.7005		0.7346	0.758	0.745	0.7695		0.5813	0.568	0.6138	0.5996		0.758314	0.7886	0.774729	0.793483
6.76	0.8097	0.8333	0.8041	0.8302		0.7963	0.8321	0.8305	0.8428		0.741	0.7818	0.7778		0.912	0.9475	0.8965	0.9316		0.7018	0.7004		0.6961	0.7612	0.7433	0.7681		0.5824	0.5701	0.6155	0.6007		0.748471	0.78884	0.767443	0.791867
7.02	0.7835	0.8295	0.7891	0.8243		0.7837	0.8311	0.8194	0.8421		0.7384	0.7825	0.7779		0.9008	0.9475	0.8795	0.9285		0.7014	0.7038		0.6678	0.7608	0.7411	0.7694		0.5842	0.5719	0.6165	0.599		0.737114	0.78816	0.7617	0.7902
7.28	0.7601	0.8172	0.7753	0.8191		0.7713	0.8331	0.8111	0.8392		0.7365	0.7815	0.778		0.89	0.9479	0.8654	0.928		0.699	0.7052		0.6468	0.7616	0.7398	0.7698		0.5859	0.5731	0.6182	0.6004		0.727086	0.78658	0.756643	0.789083
7.54	0.7421	0.808	0.7617	0.8131		0.7577	0.8312	0.8024	0.8361		0.73	0.7815	0.778		0.8819	0.9496	0.856	0.9242		0.6986	0.7089		0.6306	0.7621	0.7375	0.7708		0.5857	0.5727	0.618	0.5999		0.718086	0.78472	0.752286	0.787017
7.8	0.7286	0.8	0.7526	0.8068		0.7499	0.8305	0.7913	0.8348		0.7165	0.7737	0.7764		0.8731	0.9505	0.8457	0.9228		0.699	0.7092		0.6187	0.7619	0.7368	0.7714		0.5854	0.5753	0.6173	0.5998		0.710171	0.78364	0.746657	0.785333
8.06	0.7179	0.7926	0.7458	0.8006		0.743	0.8276	0.7852	0.8347		0.708	0.7602	0.7681		0.8588	0.9505	0.8383	0.9213		0.6964	0.7081		0.6183	0.761	0.7356	0.7661		0.5844	0.5733	0.6147	0.5992		0.703829	0.781	0.741129	0.781667
8.32	0.7101	0.7855	0.7403	0.7952		0.7341	0.8247	0.7792	0.8325		0.7018	0.7537	0.7644		0.8425	0.9479	0.8327	0.9197		0.6928	0.7079		0.6043	0.7548	0.7265	0.7635		0.5835	0.5731	0.6139	0.5991		0.695586	0.7772	0.736314	0.779067
8.58	0.702	0.779	0.7347	0.7906		0.7276	0.8204	0.7759	0.8274		0.6976	0.7505	0.7617		0.8258	0.9428	0.8262	0.917		0.6895	0.7081		0.596	0.7491	0.7002	0.7595		0.5826	0.5724	0.6132	0.599		0.688729	0.77274	0.729829	0.775867
8.84	0.6964	0.7719	0.7317	0.786		0.7263	0.8181	0.7745	0.8269		0.6945	0.7449	0.7598		0.8141	0.9371	0.8208	0.9158		0.6874	0.7077		0.5919	0.744	0.6792	0.7568		0.5801	0.5722	0.6126	0.5984		0.684386	0.76866	0.724486	0.77395
9.1	0.692	0.766	0.7266	0.7819		0.7246	0.8159	0.7728	0.8283		0.6895	0.7419	0.758		0.8046	0.9318	0.8164	0.9135		0.6836	0.709		0.5887	0.7393	0.6633	0.7551		0.5789	0.5718	0.6098	0.5985		0.680271	0.76496	0.719971	0.77255
9.36	0.6887	0.7589	0.7231	0.7778		0.7242	0.8116	0.7695	0.8257		0.6871	0.7397	0.7563		0.7966	0.9265	0.8138	0.912		0.6778	0.7094		0.5863	0.7345	0.6505	0.7531		0.5759	0.5709	0.6068	0.5987		0.676657	0.76048	0.716114	0.7706
9.62	0.6859	0.7531	0.7206	0.7728		0.7211	0.8097	0.7679	0.8235		0.685	0.7383	0.7542		0.791	0.9215	0.8111	0.9109		0.6755	0.7098		0.5848	0.7295	0.6406	0.7498		0.5742	0.5705	0.6054	0.5979		0.673929	0.75686	0.713386	0.768183
9.88	0.6832	0.7475	0.7185	0.7685		0.7177	0.8064	0.7674	0.8229		0.6821	0.7343	0.7528		0.785	0.9166	0.8085	0.9087		0.6738	0.7095		0.5828	0.7245	0.6325	0.7468		0.5732	0.5703	0.6045	0.5983		0.671114	0.75306	0.710743	0.766333
10.14	0.6809	0.7429	0.7153	0.7653		0.7147	0.804	0.7664	0.8239		0.6784	0.7327	0.7513		0.7803	0.9115	0.8051	0.9064		0.6694	0.7088		0.578	0.72	0.6259	0.7455		0.5721	0.5702	0.6032	0.5986		0.667686	0.74972	0.7082	0.765167
10.4	0.6792	0.7384	0.7117	0.7611		0.7159	0.8009	0.762	0.8204		0.6752	0.7305	0.7501		0.7766	0.9066	0.8024	0.9043		0.6653	0.708		0.5757	0.715	0.6204	0.743		0.5688	0.5697	0.6015	0.599		0.665243	0.74612	0.705214	0.762983
10.66	0.6773	0.7343	0.7095	0.7576		0.7114	0.7973	0.7616	0.8218		0.6732	0.7288	0.749		0.7722	0.9014	0.7994	0.903		0.6623	0.7038		0.5739	0.7103	0.6159	0.7404		0.5674	0.5696	0.6007	0.599		0.662529	0.74258	0.702814	0.7618
10.92	0.6748	0.7297	0.7071	0.7534		0.7104	0.7939	0.7584	0.8196		0.6719	0.7267	0.7482		0.7689	0.896	0.797	0.9015		0.6605	0.7028		0.5724	0.7052	0.6119	0.7391		0.5661	0.5689	0.6001	0.5989		0.660714	0.73874	0.700571	0.760117
11.18	0.6716	0.7253	0.7051	0.7508		0.7094	0.7892	0.7572	0.819		0.6701	0.7251	0.7468		0.7659	0.8908	0.7953	0.8997		0.657	0.701		0.571	0.7003	0.6085	0.7348		0.5633	0.5678	0.5998	0.5981		0.658329	0.73468	0.698857	0.7582
11.44	0.6692	0.7206	0.7024	0.7474		0.7068	0.7875	0.7577	0.8177		0.6686	0.7237	0.7461		0.7632	0.8859	0.7935	0.8966		0.6553	0.6997		0.5698	0.6956	0.6054	0.7334		0.5618	0.568	0.5996	0.5977		0.656386	0.73152	0.697429	0.756483
11.7	0.6674	0.7168	0.7003	0.7441		0.7057	0.7824	0.7563	0.8163		0.6674	0.7219	0.7448		0.7612	0.8813	0.7913	0.8938		0.6533	0.6968		0.5685	0.6914	0.6026	0.7332		0.5598	0.5687	0.5981	0.5975		0.654757	0.72812	0.695329	0.75495
11.96	0.6655	0.7133	0.6981	0.741		0.7053	0.7807	0.7543	0.8138		0.6663	0.7203	0.7442		0.7582	0.8762	0.7891	0.8915		0.6525	0.6958		0.5674	0.6865	0.6003	0.7298		0.5586	0.5684	0.598	0.597		0.6534	0.72502	0.6937	0.752883
12.22	0.6635	0.71	0.696	0.7381		0.7042	0.7767	0.7524	0.8132		0.6652	0.7191	0.7434		0.7561	0.8713	0.7869	0.89		0.6505	0.6935		0.5666	0.682	0.5985	0.7278		0.558	0.5686	0.598	0.5967		0.652014	0.72172	0.692057	0.751533
12.48	0.6619	0.7067	0.6942	0.7349		0.7054	0.7705	0.7538	0.8119		0.6637	0.7181	0.7429		0.7549	0.8669	0.7846	0.8884		0.648	0.6904		0.5661	0.6786	0.5964	0.725		0.5573	0.5678	0.5982	0.5958		0.651043	0.7181	0.690814	0.749817
12.74	0.6601	0.7038	0.6925	0.7313		0.7009	0.7677	0.7501	0.8109		0.6623	0.7165	0.7421		0.7523	0.8637	0.7828	0.8869		0.6469	0.6891		0.5657	0.6743	0.5944	0.722		0.5562	0.5678	0.5973	0.5946		0.6492	0.71546	0.688957	0.747967
13	0.6585	0.7007	0.6908	0.7293		0.7017	0.7612	0.75	0.8099		0.6607	0.7154	0.7415		0.7503	0.8612	0.7806	0.885		0.6451	0.6861		0.5655	0.6683	0.5928	0.7232		0.556	0.5692	0.5969	0.5939		0.648257	0.71212	0.687514	0.747133
13.26	0.6569	0.6973	0.6895	0.7265		0.7016	0.7575	0.7482	0.8079		0.6592	0.7143	0.7411		0.7484	0.8594	0.7784	0.8832		0.6432	0.6838		0.5648	0.6641	0.5912	0.7188		0.5554	0.5668	0.597	0.5931		0.647071	0.70902	0.686057	0.7451
13.52	0.6557	0.6944	0.6877	0.7233		0.699	0.7539	0.7468	0.8078		0.6579	0.7131	0.7408		0.7464	0.8574	0.776	0.8814		0.6418	0.6829		0.5633	0.66	0.5896	0.7173		0.5553	0.5657	0.5972	0.5926		0.645629	0.70628	0.684757	0.743867
13.78	0.6545	0.692	0.6858	0.7208		0.6979	0.7484	0.7459	0.8066		0.6561	0.7121	0.7401		0.746	0.8555	0.7739	0.8799		0.6389	0.6802		0.5622	0.6563	0.5879	0.7151		0.5547	0.5657	0.5963	0.5923		0.644329	0.70358	0.683157	0.742467
14.04	0.6532	0.6889	0.6834	0.7182		0.6953	0.7445	0.7453	0.8064		0.655	0.7112	0.7386		0.7446	0.8534	0.772	0.8786		0.6358	0.6774		0.5615	0.6534	0.5864	0.7126		0.5538	0.5653	0.5943	0.5921		0.642743	0.7011	0.681429	0.741083
14.3	0.6522	0.6868	0.681	0.7154		0.6933	0.7408	0.7433	0.8042		0.6545	0.7104	0.7379		0.743	0.8512	0.7704	0.8766		0.6343	0.6761		0.5605	0.6515	0.5854	0.7115		0.5537	0.5643	0.5927	0.5911		0.641643	0.69892	0.6799	0.73945
14.56	0.6507	0.6846	0.6792	0.7132		0.6919	0.7358	0.7417	0.8053		0.6532	0.7093	0.7374		0.741	0.8478	0.769	0.8749		0.6312	0.6745		0.5593	0.65	0.5843	0.7087		0.5528	0.5641	0.5921	0.5904		0.640014	0.69646	0.678586	0.738317
14.82	0.6486	0.6818	0.6776	0.7109		0.6898	0.7325	0.7399	0.8024		0.6519	0.7085	0.7367		0.7404	0.8439	0.7682	0.8739		0.6284	0.673		0.5583	0.6487	0.5832	0.7057		0.5526	0.5639	0.5909	0.5893		0.638571	0.69416	0.677329	0.736483
15.08	0.6471	0.6796	0.6764	0.7087		0.6915	0.7288	0.7366	0.803		0.6513	0.7072	0.7361		0.7384	0.8397	0.7668	0.8715		0.626	0.6724		0.5577	0.6476	0.5825	0.7033		0.5515	0.5637	0.5905	0.5882		0.637643	0.69188	0.676057	0.735133
15.34	0.6457	0.6769	0.675	0.7064		0.6896	0.7254	0.737	0.8006		0.6507	0.7062	0.7353		0.7372	0.8351	0.7659	0.8699		0.6216	0.6711		0.5571	0.6473	0.5816	0.7035		0.5507	0.5635	0.5902	0.5872		0.636086	0.68964	0.675286	0.733817
15.6	0.6443	0.6749	0.673	0.7038		0.6893	0.7225	0.7358	0.8003		0.6494	0.7056	0.7347		0.7364	0.8309	0.764	0.8684		0.6198	0.6708		0.5565	0.6473	0.5806	0.7008		0.5491	0.5623	0.5896	0.5864		0.634971	0.68758	0.6742	0.7324
15.86	0.6427	0.6729	0.6704	0.7008		0.6871	0.719	0.7343	0.7987		0.6477	0.7048	0.7344		0.7355	0.8265	0.7624	0.8668		0.6175	0.6697		0.5561	0.6477	0.5797	0.6975		0.5487	0.5619	0.5892	0.5851		0.633614	0.6856	0.672929	0.73055
16.12	0.6412	0.6713	0.6671	0.6975		0.6862	0.7162	0.7341	0.7975		0.6464	0.7044	0.7338		0.7341	0.8218	0.7607	0.8642		0.6118	0.6687		0.5555	0.6477	0.5788	0.6977		0.5483	0.5616	0.5887	0.5842		0.631929	0.68372	0.671786	0.72915
16.38	0.6392	0.6695	0.6628	0.6948		0.6856	0.7128	0.7308	0.7984		0.6454	0.704	0.7331		0.7329	0.8169	0.7596	0.8614		0.6108	0.6685		0.5548	0.647	0.5779	0.6962		0.547	0.5604	0.5879	0.5825		0.630814	0.68132	0.670214	0.727733
16.64	0.6377	0.6672	0.6579	0.6913		0.6855	0.7104	0.73	0.7961		0.6448	0.7034	0.7325		0.7314	0.8124	0.7583	0.8591		0.61	0.6685		0.5544	0.6463	0.5772	0.6963		0.5468	0.5598	0.5876	0.5814		0.630086	0.67922	0.668986	0.726117
16.9	0.636	0.6646	0.6545	0.6884		0.6834	0.7066	0.7297	0.7949		0.6445	0.7032	0.7318		0.7294	0.808	0.7567	0.8566		0.6078	0.6681		0.5542	0.6454	0.5771	0.6959		0.5463	0.5591	0.5869	0.5809		0.6288	0.67674	0.668029	0.72475
17.16	0.6345	0.6623	0.6523	0.6858		0.6819	0.7037	0.728	0.7939		0.6445	0.7028	0.7314		0.728	0.8031	0.7557	0.8542		0.6074	0.6681		0.5539	0.6441	0.5774	0.6937		0.5453	0.5577	0.5832	0.5799		0.627929	0.67418	0.666786	0.72315
17.42	0.6323	0.66	0.6504	0.6828		0.6814	0.7016	0.725	0.7915		0.6451	0.7017	0.7307		0.727	0.7983	0.7549	0.8524		0.6054	0.6691		0.553	0.6424	0.5782	0.6923		0.5446	0.5569	0.5815	0.5794		0.626971	0.67184	0.665829	0.721517
17.68	0.6287	0.6583	0.6489	0.6807		0.6806	0.6978	0.7239	0.7904		0.6447	0.7003	0.7306		0.7253	0.793	0.7534	0.8503		0.6048	0.6693		0.5518	0.6408	0.5794	0.6935		0.5437	0.556	0.5801	0.5786		0.625657	0.66918	0.665043	0.720683
17.94	0.6246	0.6565	0.6475	0.6787		0.6791	0.6956	0.7237	0.79		0.6446	0.6996	0.7301		0.7229	0.7883	0.7523	0.8479		0.6023	0.6695		0.5509	0.639	0.5807	0.6926		0.5418	0.555	0.5755	0.5768		0.623743	0.66688	0.664114	0.71935
18.2	0.6213	0.6539	0.647	0.6759		0.6787	0.6927	0.7212	0.7886		0.6446	0.6992	0.7293		0.722	0.7843	0.7511	0.8459		0.6016	0.6691		0.5501	0.6373	0.5823	0.6905		0.5399	0.5545	0.5736	0.5767		0.6226	0.66454	0.663357	0.717817
18.46	0.6193	0.6512	0.6461	0.6741		0.6772	0.6913	0.7214	0.7879		0.644	0.6983	0.7287		0.7215	0.7802	0.7494	0.8431		0.6007	0.6689		0.5496	0.6352	0.5837	0.6915		0.5379	0.5537	0.5722	0.5763		0.621457	0.66232	0.662857	0.716933
18.72	0.6178	0.6489	0.6445	0.6716		0.6774	0.6908	0.7205	0.7857		0.6436	0.6977	0.7278		0.7208	0.7763	0.7482	0.8398		0.5971	0.6691		0.5493	0.6326	0.5842	0.6901		0.5341	0.5523	0.57	0.575		0.620014	0.66018	0.662029	0.715
18.98	0.6161	0.6465	0.6423	0.6693		0.6756	0.6887	0.719	0.7844		0.6425	0.6965	0.727		0.7204	0.7731	0.7472	0.8381		0.5957	0.6689		0.5491	0.6303	0.5845	0.6909		0.5314	0.5517	0.5692	0.5743		0.618686	0.65806	0.661086	0.714
19.24	0.6151	0.6449	0.6412	0.6674		0.6744	0.6865	0.7183	0.7834		0.6409	0.695	0.7268		0.7197	0.7694	0.746	0.8362		0.5925	0.6687		0.5485	0.6276	0.5844	0.6885		0.5275	0.5502	0.5684	0.5721		0.616943	0.65572	0.660286	0.7124
19.5	0.6142	0.6435	0.6407	0.6654		0.6729	0.6848	0.7161	0.7825		0.6392	0.6944	0.7264		0.7187	0.7658	0.7452	0.8334		0.5911	0.6693		0.5485	0.6245	0.5849	0.6885		0.526	0.5497	0.5678	0.572		0.6158	0.65366	0.659771	0.711367
19.76	0.6135	0.6418	0.6403	0.6634		0.6715	0.6841	0.7135	0.781		0.6376	0.6944	0.726		0.7172	0.7624	0.7443	0.8307		0.59	0.6689		0.5486	0.6212	0.5848	0.6853		0.5249	0.5497	0.568	0.5716		0.614757	0.65184	0.659171	0.709667
20.02	0.6128	0.6404	0.6402	0.6608		0.6708	0.6843	0.7136	0.7801		0.6362	0.6941	0.7251		0.7163	0.759	0.7428	0.8277		0.5883	0.6678		0.5486	0.6184	0.5846	0.6851		0.5233	0.5492	0.568	0.5709		0.613757	0.65026	0.658729	0.708283
20.28	0.6118	0.6391	0.6398	0.6594		0.6703	0.6831	0.7154	0.7793		0.6349	0.6939	0.7244		0.7151	0.7558	0.7422	0.8253		0.5861	0.6685		0.5485	0.6157	0.5835	0.6849		0.5207	0.5481	0.5687	0.5707		0.612486	0.64836	0.658857	0.707333
20.54	0.6107	0.6379	0.639	0.6584		0.6703	0.6815	0.7167	0.778		0.6335	0.6926	0.7237		0.7142	0.7532	0.7416	0.8231		0.585	0.668		0.5471	0.6132	0.5831	0.6837		0.52	0.5474	0.5689	0.57		0.611543	0.64664	0.658557	0.70615
20.8	0.6099	0.6369	0.6384	0.6561		0.6699	0.6799	0.7169	0.7767		0.6326	0.6924	0.7232		0.7135	0.7505	0.741	0.8208		0.5835	0.6679		0.5469	0.6114	0.5838	0.6835		0.5186	0.5457	0.5687	0.5702		0.6107	0.64488	0.658443	0.705083
Delta Absorbance at 5 min. after calcium addition																																	AV	SE
WTCa	0.1595					0.0845					0.1244				0.1425					0.0303			0.157					0.0101					0.101186	0.0230741
WTCaCsA		0.0885					0.0028									0.0196								-0.0047					-0.004				0.02044	0.017569	0.0273448
KOCa			0.1205					0.0713				0.0738					0.0926				-0.0213				0.113					0.0097			0.0656571	0.0199797		0.267035
KOCaCsA				0.0603					0.0066				0.0611					-0.007								-0.0273					-0.0105		0.0138667	0.0154528	0.071307

## Sheet: Ca2+
Ca2+ Handling w. Ca-Green 5N. Each expt. is a separate mito' prep (Figures 5D & 5E)
20 nM pulses of Ca2+ at 2 min. intervals starting at 1 min.
													Traces, Expts. 1-5 top to bottom					Fig. 5D
													Expt. 1 used for example in Fig. 5C					Calc' # of pulses to trigger PT pore…
		Expt. 1		Expt 2		Expt3		Expt4		Expt5									WT	KO
	Time (min.)	WT	KO	WT	KO	WT	KO	WT	KO	WT	KO								5	7
	0.00208333	1.45694	-0.898801	-0.912663	-0.818482	0.28513	-0.455832	-0.202504	-1.05451	1.45694	-0.898801								6	8
	0.01875	0.848518	-1.1966	-1.03369	-1.13038	0.324635	-0.310794	0.595656	-1.21751	0.848518	-1.1966								6	8
	0.0354167	1.34974	-0.92222	-0.59219	-1.07778	0.0954689	-0.895614	0.554443	-1.16813	1.34974	-0.92222								6	8
	0.0520833	0.826263	-1.3413	-0.4753	-0.727033	0.0583534	-0.557595	0.108122	-0.594776	0.826263	-1.3413								5	7
	0.06875	1.23784	-1.11535	-1.24885	-1.49252	0.0944302	-0.78756	0.580247	-0.461591	1.23784	-1.11535							Ave	5.6	7.6
	0.0854167	1.23023	-0.756234	-1.67422	-1.0192	0.00129089	-0.435577	0.430346	-1.54877	1.23023	-0.756234							SE	0.244949	0.244949
	0.102083	1.42851	-1.40372	-1.18541	-1.73123	0.172758	-0.603955	0.318939	-0.851515	1.42851	-1.40372							P	0.000417607
	0.11875	1.09222	-0.607139	-1.49141	-1.00186	0.0924065	-0.920411	0.646387	-0.908127	1.09222	-0.607139
	0.135417	1.09922	-1.59561	-0.84762	-1.68548	-0.0736256	-0.211399	0.319615	-1.18037	1.09922	-1.59561
	0.152083	0.836057	-1.03206	-1.59909	-1.22787	0.0206608	-1.17547	-0.317871	-1.48599	0.836057	-1.03206
	0.16875	1.29736	-0.732961	-1.14837	-1.34676	0.162523	-1.07445	0.435037	-1.26228	1.29736	-0.732961							Fig. 5E
	0.185417	0.769031	-1.14798	-1.57595	-1.71323	-0.949013	-1.5227	0.280764	-1.02716	0.769031	-1.14798							Calc' downward slopes for Ca2+ entry kinetics…
	0.202083	0.883608	-1.49978	-1.10177	-1.56446	-0.400575	-1.01924	0.64375	-0.829707	0.883608	-1.49978
	0.21875	0.405993	-0.753914	-1.06018	-1.63341	0.274366	-1.26045	0.222416	-1.82619	0.405993	-0.753914							Slopes for first uptake (1 min)
	0.235417	1.02174	-1.40911	-0.97887	-1.53399	0.122184	-1.32197	0.0720341	-1.33288	1.02174	-1.40911							WTs	7.33743		10.4036		11.776		0.383255		7.33743
	0.252083	0.0912842	-1.44445	-1.50296	-2.0163	0.121348	-1.1462	0.41846	-1.49172	0.0912842	-1.44445							KOs		13.7719		15.3101		13.7339		13.8434		13.7719
	0.26875	1.28075	-1.53817	-1.52933	-1.27728	0.111925	-1.26358	0.783038	-1.87356	1.28075	-1.53817
	0.285417	0.787498	-1.49172	-1.04737	-2.25805	-0.236695	-0.863102	0.793021	-1.94138	0.787498	-1.49172							Slopes for 2nd Uptake (3 min)
	0.302083	0.271828	-1.29451	-1.20022	-1.73478	-0.00185127	-1.74335	0.461934	-1.74224	0.271828	-1.29451							WTs	8.00691		14.9393		11.6042		19.5628		8.00691
	0.31875	0.725465	-1.77753	-2.26993	-2.27997	-0.668102	-1.25712	0.618142	-1.46238	0.725465	-1.77753							KOs		8.90283		18.2462		8.73911		16.874		8.90283
	0.335417	0.915958	-1.65347	-1.21744	-2.19197	-0.844666	-1.41817	0.0163433	-1.48941	0.915958	-1.65347
	0.352083	0.815573	-2.06103	-1.40938	-2.43317	-0.286626	-1.82991	0.0842827	-2.2802	0.815573	-2.06103							Slopes for 3rd uptake (5 min)
	0.36875	0.585154	-1.71826	-1.7331	-2.0556	-0.119738	-1.48362	-0.138995	-1.74122	0.585154	-1.71826							WTs	8.25339		11.4842		11.7128		15.8341		8.64675
	0.385417	0.583557	-1.40891	-1.83214	-2.23066	-0.263225	-1.72009	-0.0425434	-1.87466	0.583557	-1.40891							KOs		11.7537		15.8473		13.9747		15.9488		11.7537
	0.402083	0.363388	-1.75633	-1.16674	-2.46056	-0.365491	-1.55528	0.584553	-2.13991	0.363388	-1.75633
	0.41875	0.866711	-1.43006	-1.35031	-2.28169	-0.275961	-1.50629	0.369752	-2.43666	0.866711	-1.43006							Ave slopes for all 3 additions
	0.435417	0.396493	-1.93926	-1.93197	-1.73108	0.0708511	-1.59534	0.353427	-1.65073	0.396493	-1.93926							WTs	7.86591		12.2757		11.6977		11.9267		7.99703
	0.452083	0.454748	-1.657	-2.28587	-2.14322	-0.421466	-1.50155	0.153462	-1.70693	0.454748	-1.657							KOs		11.4762		16.4679		12.1492		15.5554		11.4762
	0.46875	1.30589	-1.72898	-2.46912	-2.33585	-0.216997	-1.21393	0.380563	-1.45196	1.30589	-1.72898
	0.485417	0.579842	-1.49669	-1.10439	-2.31324	-0.614266	-1.70489	-0.0451126	-1.95794	0.579842	-1.49669								WT	KO
	0.502083	0.573822	-1.36656	-2.26587	-2.33399	-0.755535	-1.72988	0.105122	-1.65405	0.573822	-1.36656							Ave	10.3526	13.425
	0.51875	0.657189	-1.69815	-1.65353	-1.74637	-1.05249	-1.40073	0.483606	-1.98251	0.657189	-1.69815							SE	0.99292	1.07287
	0.535417	0.735397	-1.46049	-1.7491	-2.46479	-0.318822	-1.94248	0.448098	-2.52201	0.735397	-1.46049							P	0.0687536
	0.552083	0.340353	-1.80918	-2.06064	-2.75723	-0.143812	-1.71158	-0.278662	-2.31363	0.340353	-1.80918
	0.56875	-0.20255	-2.59084	-2.14861	-2.64125	-0.432632	-2.15247	0.456716	-2.20478	-0.20255	-2.59084
	0.585417	0.7416	-2.12906	-1.86613	-2.50883	-0.279503	-2.00721	-0.0681698	-2.27039	0.7416	-2.12906
	0.602083	0.219706	-2.38144	-2.10908	-2.67884	-0.754024	-1.41795	-0.387341	-2.13153	0.219706	-2.38144
	0.61875	0.811458	-1.93992	-1.70842	-2.48409	-0.200024	-1.96646	0.160929	-2.45935	0.811458	-1.93992
	0.635417	0.680576	-2.34943	-2.21	-2.85718	-0.581039	-1.85532	-0.169312	-2.08062	0.680576	-2.34943
	0.652083	0.336108	-1.94324	-1.90796	-2.48037	-0.0292549	-1.63034	0.106612	-2.36507	0.336108	-1.94324
	0.66875	0.23105	-2.66962	-2.28664	-2.41685	-0.814876	-2.09796	0.24668	-2.87682	0.23105	-2.66962
	0.685417	0.184033	-2.30802	-1.52848	-3.024	-0.476707	-1.84796	-0.345436	-2.24586	0.184033	-2.30802
	0.702083	0.165117	-2.1954	-2.97094	-2.62542	-0.777602	-2.47749	-0.0595772	-2.09982	0.165117	-2.1954
	0.71875	0.445665	-2.73214	-2.15388	-2.82691	-0.822312	-1.97628	-0.345579	-2.84856	0.445665	-2.73214
	0.735417	-0.163303	-2.53958	-1.75705	-2.54079	-0.4123	-2.11977	0.0445305	-2.50556	-0.163303	-2.53958
	0.752083	0.875995	-1.88645	-2.22982	-2.99824	-0.3349	-1.81093	-0.175938	-1.7147	0.875995	-1.88645
	0.76875	0.544507	-2.19756	-2.85067	-3.07702	-0.653537	-1.89716	0.627821	-2.92507	0.544507	-2.19756
	0.785417	0.344061	-3.20968	-2.39323	-3.13216	-1.0187	-2.27302	0.322439	-3.32869	0.344061	-3.20968
	0.802083	0.347723	-2.22118	-2.53791	-3.20863	-0.662627	-1.63803	0.477228	-3.0649	0.347723	-2.22118
	0.81875	0.0309105	-2.95457	-2.62817	-3.10092	-0.816721	-2.70749	0.0366528	-3.07103	0.0309105	-2.95457
	0.835417	0.277169	-2.49022	-2.79489	-2.74264	-0.34547	-2.25451	-0.10556	-2.66865	0.277169	-2.49022
	0.852083	0.483753	-2.69541	-2.66095	-2.60107	-0.600381	-2.66113	0.34265	-3.1927	0.483753	-2.69541
	0.86875	3.72036	-2.23014	-2.16448	-2.5178	-1.35555	-1.96303	-0.00430679	-3.10074	3.72036	-2.23014
	0.885417	9.22063	-2.4478	-2.23941	-3.10014	-0.86705	-2.37177	-0.330033	-2.67858	9.22063	-2.4478
	0.902083	12.462	-2.6645	-2.67167	-3.49671	-0.84199	-2.00744	0.318372	-3.21636	12.462	-2.6645
	0.91875	13.202	-2.68756	-2.28481	-3.11945	-0.615214	-2.24608	0.152505	-3.59827	13.202	-2.68756
	0.935417	14.4919	-2.44449	-2.99477	-2.83113	-0.687362	-2.46916	-0.302823	-2.59876	14.4919	-2.44449
	0.952083	14.0603	-2.21695	-2.12152	-3.56283	-0.769476	-2.581	0.377762	-2.85611	14.0603	-2.21695
	0.96875	14.5846	-1.51698	-2.65242	-2.1133	-0.0583111	0.0825546	0.294694	5.83054	14.5846	-1.51698
	0.985417	14.3235	-1.27583	5.71165	13.0632	8.9377	8.44897	-0.0394188	11.7783	14.3235	-1.27583
	1.00208	14.3393	4.06966	13.1953	16.9275	12.641	10.1831	0.463652	15.0578	14.3393	4.06966
	1.01875	14.8692	9.3407	16.8365	19.8488	13.2853	10.415	10.3216	16.7437	14.8692	9.3407
	1.03542	14.0651	10.8472	18.4233	19.8536	13.0619	11.1978	14.1364	17.5142	14.0651	10.8472
	1.05208	13.7545	11.0644	19.7888	19.5952	13.3625	11.0029	15.0717	17.8732	13.7545	11.0644
	1.06875	13.0107	10.8875	20.3752	20.0925	13.3042	10.9742	17.3501	17.2015	13.0107	10.8875
	1.08542	13.8233	10.3955	20.904	20.0914	13.1607	10.9679	18.8517	17.2364	13.8233	10.3955
	1.10208	13.5304	9.48985	20.705	20.1926	12.7474	11.3792	18.6275	17.0486	13.5304	9.48985
	1.11875	12.9427	10.5492	21.0766	19.8565	12.4026	10.7662	19.887	17.5636	12.9427	10.5492
	1.13542	13.2646	9.57316	20.783	18.8245	12.5373	10.5377	19.4409	16.2318	13.2646	9.57316
	1.15208	13.413	9.01615	20.925	19.4755	12.4649	10.4825	19.4317	16.253	13.413	9.01615
	1.16875	13.5542	9.67161	20.389	19.0918	11.7372	9.26907	19.6168	16.5041	13.5542	9.67161
	1.18542	12.5858	8.58431	20.1735	19.1636	11.8091	9.98258	19.528	15.7549	12.5858	8.58431
	1.20208	12.9277	8.80806	19.9524	18.4375	11.4569	9.351	19.9851	16.319	12.9277	8.80806
	1.21875	12.8266	8.07553	20.3402	19.0806	11.5741	9.71094	20.226	16.1265	12.8266	8.07553
	1.23542	12.8712	8.56515	20.3398	19.1741	11.2143	9.32363	20.0553	15.101	12.8712	8.56515
	1.25208	12.189	8.83803	19.7975	18.0922	11.3995	8.98638	20.3147	14.9691	12.189	8.83803
	1.26875	12.1814	7.75182	19.0873	17.8113	10.1294	8.04162	19.2716	14.8195	12.1814	7.75182
	1.28542	11.9643	8.14208	19.4086	18.0046	10.6977	8.35371	19.6949	14.6951	11.9643	8.14208
	1.30208	12.0454	7.4267	18.7947	17.0235	10.4764	7.41969	19.6969	14.3278	12.0454	7.4267
	1.31875	11.6119	7.1836	19.2662	16.3052	10.4565	7.47129	18.5617	14.0692	11.6119	7.1836
	1.33542	11.6492	6.57639	18.4226	16.1326	10.1561	7.20931	19.0191	13.5778	11.6492	6.57639
	1.35208	11.8167	6.92926	18.2115	16.0447	9.66686	7.31626	19.3535	13.8615	11.8167	6.92926
	1.36875	11.2563	6.12416	18.11	16.0018	10.0793	7.35411	18.9343	13.282	11.2563	6.12416
	1.38542	11.1529	6.6757	17.9878	16.1094	9.67533	6.72877	18.1387	13.0987	11.1529	6.6757
	1.40208	10.5905	6.87508	17.747	16.2281	9.48868	6.50913	18.4586	12.0046	10.5905	6.87508
	1.41875	10.8101	5.92897	17.3312	16.2454	8.88033	6.04522	18.7718	11.4606	10.8101	5.92897
	1.43542	11.0495	5.66059	17.6951	14.9336	9.04685	6.31417	18.0413	13.1899	11.0495	5.66059
	1.45208	10.7869	6.25487	16.57	14.9998	8.50603	5.67524	18.2193	12.1652	10.7869	6.25487
	1.46875	10.7748	5.30675	16.1954	14.6749	9.07419	5.961	18.7674	11.5353	10.7748	5.30675
	1.48542	10.1811	5.08362	15.9648	14.6495	8.80132	5.87147	17.742	10.9481	10.1811	5.08362
	1.50208	10.1857	5.00614	15.9842	14.1445	8.49778	5.75857	17.2554	10.5786	10.1857	5.00614
	1.51875	10.3282	4.91607	15.1665	13.7081	8.28222	5.20429	17.5624	11.3223	10.3282	4.91607
	1.53542	10.4014	5.10107	15.5153	13.1998	8.83134	5.3209	17.5147	10.8436	10.4014	5.10107
	1.55208	9.93834	4.41492	15.6387	14.079	8.13818	5.43652	17.195	10.1722	9.93834	4.41492
	1.56875	9.66803	4.87609	15.2548	12.9779	7.69045	4.7042	17.1137	10.3006	9.66803	4.87609
	1.58542	10.3623	4.65078	15.6242	13.5441	7.64723	4.98191	17.1223	10.365	10.3623	4.65078
	1.60208	9.21202	3.675	14.8879	13.2689	7.2654	4.50206	16.9176	9.56229	9.21202	3.675
	1.61875	9.90374	4.03359	14.6044	12.9766	7.88418	4.5479	17.124	8.80369	9.90374	4.03359
	1.63542	9.88819	3.643	13.9616	13.1854	7.80872	4.09003	16.2445	9.1074	9.88819	3.643
	1.65208	9.20857	3.99528	14.3259	12.3548	7.14429	4.02501	16.5916	8.77796	9.20857	3.99528
	1.66875	9.47839	4.15117	13.6463	12.4103	7.09368	4.53454	16.3716	9.26841	9.47839	4.15117
	1.68542	8.95723	4.05512	13.9104	12.0078	7.36853	3.97666	16.6031	9.23329	8.95723	4.05512
	1.70208	9.39954	3.5829	13.5181	11.4323	7.18774	4.1677	15.9287	8.38481	9.39954	3.5829
	1.71875	8.15329	3.16914	13.6379	11.6256	7.16137	3.64903	16.2887	8.14301	8.15329	3.16914
	1.73542	8.68815	3.24408	14.3869	11.194	6.58719	3.26764	15.8979	8.09742	8.68815	3.24408
	1.75208	8.88224	3.11517	13.9149	11.4457	6.49768	3.55322	16.2899	8.27693	8.88224	3.11517
	1.76875	8.42269	2.98482	13.4993	11.0933	6.75762	3.82087	15.7128	8.27738	8.42269	2.98482
	1.78542	8.27517	2.47224	12.8303	10.6485	6.53792	3.09825	15.1535	7.6737	8.27517	2.47224
	1.80208	8.50581	2.93175	13.1716	10.7753	6.52658	2.89721	14.8877	7.45572	8.50581	2.93175
	1.81875	8.37005	3.00225	12.9518	10.2841	6.27255	3.07421	15.8305	7.54331	8.37005	3.00225
	1.83542	8.2563	2.59417	12.9511	10.3946	6.71422	2.517	15.2103	7.14472	8.2563	2.59417
	1.85208	8.12587	2.13689	12.3833	9.86969	6.09934	2.52915	15.3846	6.72682	8.12587	2.13689
	1.86875	8.38669	2.56239	11.7763	9.74921	6.36378	2.57688	15.2971	7.63873	8.38669	2.56239
	1.88542	7.77058	1.87444	12.5136	9.83	5.97351	2.59635	14.5216	6.50492	7.77058	1.87444
	1.90208	7.50174	2.0316	12.3183	9.52602	6.35317	2.61497	14.6165	6.67693	7.50174	2.0316
	1.91875	7.71536	2.10667	11.7528	9.30509	5.98181	2.24882	14.9812	5.99638	7.71536	2.10667
	1.93542	7.89776	2.0849	11.5639	9.37083	5.87415	2.08106	14.4949	6.14579	7.89776	2.0849
	1.95208	6.94188	1.88588	11.3097	8.67153	5.60631	2.22785	14.5246	6.41013	6.94188	1.88588
	1.96875	7.22446	1.87721	11.1004	9.43693	5.53632	2.57614	14.2454	5.61805	7.22446	1.87721
	1.98542	7.88623	1.78117	11.1051	9.1758	4.92792	2.3179	14.1332	5.41004	7.88623	1.78117
	2.00208	7.2567	2.14403	10.5983	8.01274	5.39693	1.96653	14.1888	6.01628	7.2567	2.14403
	2.01875	6.94248	1.91672	11.8264	8.01964	5.35078	2.29589	14.1883	5.58494	6.94248	1.91672
	2.03542	6.91873	1.27309	10.7952	8.47497	5.2892	2.20297	14.1729	5.36966	6.91873	1.27309
	2.05208	7.2061	1.14968	10.5035	8.48291	5.31773	2.10415	13.7587	4.95322	7.2061	1.14968
	2.06875	7.24971	2.00722	10.6119	7.74529	5.46715	1.97578	13.4827	4.83752	7.24971	2.00722
	2.08542	6.2975	1.47459	10.8873	7.98513	5.37878	1.5905	14.0701	5.04887	6.2975	1.47459
	2.10208	6.62965	1.44827	10.5214	7.54197	4.64432	1.29758	13.5058	5.58617	6.62965	1.44827
	2.11875	6.28484	1.26878	10.664	7.74639	4.53941	1.1824	13.9984	5.2618	6.28484	1.26878
	2.13542	7.02865	1.30719	10.1049	7.06167	4.64074	1.20808	13.9649	4.53605	7.02865	1.30719
	2.15208	6.51919	1.57116	10.5205	7.22345	4.43867	1.23998	13.5645	5.18989	6.51919	1.57116
	2.16875	6.49031	1.19928	9.68913	7.20831	4.90871	1.69656	13.2716	3.83583	6.49031	1.19928
	2.18542	6.22806	1.30037	9.60616	7.14824	4.53712	1.61514	12.8578	5.38175	6.22806	1.30037
	2.20208	6.36351	1.0106	9.69532	6.99085	4.52311	0.925011	13.5136	3.897	6.36351	1.0106
	2.21875	6.60465	1.22543	9.53812	6.92359	4.63683	1.78359	13.515	3.75923	6.60465	1.22543
	2.23542	6.42734	0.994632	9.68865	7.0201	4.16939	1.27896	13.281	3.79327	6.42734	0.994632
	2.25208	6.36309	0.764201	9.27059	6.87695	4.44981	0.575897	12.9405	3.48595	6.36309	0.764201
	2.26875	7.01426	0.632232	9.2466	6.0537	4.37816	0.976033	12.7608	3.60018	7.01426	0.632232
	2.28542	6.01404	0.340674	9.4031	6.45894	4.27734	1.07128	12.7333	4.13948	6.01404	0.340674
	2.30208	6.16148	0.966772	9.28526	6.0424	4.42494	0.726726	12.6744	3.45065	6.16148	0.966772
	2.31875	5.45524	0.611769	9.11052	5.57722	3.82748	1.04294	12.3792	3.40265	5.45524	0.611769
	2.33542	5.67014	-0.0771549	8.58589	5.6036	4.04516	0.940237	12.5109	3.8362	5.67014	-0.0771549
	2.35208	6.23542	0.349415	8.82868	5.64269	3.87381	0.598059	12.4807	3.34255	6.23542	0.349415
	2.36875	6.21634	0.832747	8.10406	5.88134	3.99971	0.699119	12.1216	3.31344	6.21634	0.832747
	2.38542	5.40622	0.0927723	8.42076	6.09908	4.36747	0.20592	12.5379	3.68142	5.40622	0.0927723
	2.40208	5.28759	0.327792	8.66558	6.08817	4.31614	0.794714	12.1596	3.42651	5.28759	0.327792
	2.41875	5.26197	0.29536	8.34334	5.17195	3.53272	0.712623	12.3292	2.70976	5.26197	0.29536
	2.43542	5.55603	0.461031	8.94722	5.15855	3.64717	0.594548	11.7546	3.29747	5.55603	0.461031
	2.45208	5.62242	0.0932301	7.78376	5.39216	3.54579	0.318219	11.8916	3.06882	5.62242	0.0932301
	2.46875	5.25364	0.426498	9.0993	4.93499	3.42398	-0.00267334	12.8416	2.83318	5.25364	0.426498
	2.48542	4.88761	0.241306	8.22016	5.30986	3.94435	0.131674	11.9606	3.42309	4.88761	0.241306
	2.50208	5.14827	0.137741	7.93568	5.49172	3.65402	0.444722	11.8464	2.44918	5.14827	0.137741
	2.51875	5.66044	0.10622	8.03802	4.42516	3.24212	-0.0972427	12.0654	2.21641	5.66044	0.10622
	2.53542	5.35386	0.12255	7.48964	4.82031	2.90091	0.528112	12.0554	2.69782	5.35386	0.12255
	2.55208	4.76785	-0.412614	7.71284	4.78941	3.21882	0.198232	11.731	1.99226	4.76785	-0.412614
	2.56875	5.00141	0.155676	7.71545	4.4507	3.66897	-0.270505	11.8419	1.80868	5.00141	0.155676
	2.58542	4.67683	-0.178338	7.54303	4.50268	2.98135	0.160976	11.4503	2.55597	4.67683	-0.178338
	2.60208	5.3624	0.218213	7.68848	4.10816	3.1826	0.080027	11.8442	2.46973	5.3624	0.218213
	2.61875	4.46764	-0.344062	7.93447	3.9973	3.59068	-0.35059	11.7049	2.05833	4.46764	-0.344062
	2.63542	5.17037	-0.427755	7.24083	3.73063	3.29615	0.109013	11.8642	2.19349	5.17037	-0.427755
	2.65208	4.7436	-0.029018	7.48202	3.97647	3.02215	-0.0179245	12.0542	2.01153	4.7436	-0.029018
	2.66875	4.55809	-0.620557	7.51398	4.07931	3.05463	-0.420029	11.4818	1.89812	4.55809	-0.620557
	2.68542	5.18102	-0.805227	8.96536	3.63543	3.6662	0.142894	11.4699	1.95614	5.18102	-0.805227
	2.70208	4.4718	-0.676516	9.82232	3.48492	2.8878	0.309869	11.309	1.59195	4.4718	-0.676516
	2.71875	4.68748	-0.375166	9.93736	4.09041	2.8777	-0.516834	11.7582	1.4952	4.68748	-0.375166
	2.73542	4.29845	-0.530336	9.16025	3.72993	2.68117	-0.0179195	11.7185	1.3612	4.29845	-0.530336
	2.75208	4.44937	-0.669745	9.1372	3.46897	2.51987	-0.278186	11.3271	2.18769	4.44937	-0.669745
	2.76875	4.56356	-0.628506	9.12095	3.78686	2.52945	-0.980967	11.3045	1.14829	4.56356	-0.628506
	2.78542	4.83391	-0.816673	9.84517	3.94072	3.37727	-0.444038	11.4671	1.29085	4.83391	-0.816673
	2.80208	4.21159	-0.502029	8.58342	3.64382	2.96881	-0.592339	11.4412	1.0016	4.21159	-0.502029
	2.81875	4.05332	-0.673482	8.85062	3.79911	2.9344	-0.518995	11.0956	1.2268	4.05332	-0.673482
	2.83542	4.63616	-0.802505	8.44889	2.92875	3.14529	-0.945139	11.375	1.61955	4.63616	-0.802505
	2.85208	4.48786	-0.934617	8.62739	3.81017	2.79519	-0.292981	10.7946	0.915188	4.48786	-0.934617
	2.86875	4.25285	-0.73857	8.79741	2.7684	2.60619	-0.299976	11.0414	0.506808	4.25285	-0.73857
	2.88542	4.18789	-1.19795	8.81306	2.76877	2.40309	-0.654863	10.8537	0.446449	4.18789	-1.19795
	2.90208	4.49487	-0.8908	8.80149	2.76377	1.95115	-0.995647	11.0558	3.45959	4.49487	-0.8908
	2.91875	3.8654	-0.125751	8.67524	3.48578	3.00863	-0.406899	11.1462	11.7512	3.8654	-0.125751
	2.93542	7.72175	2.83313	20.8795	2.67564	2.53248	-0.612741	11.3165	17.7306	7.72175	2.83313
	2.95208	11.0652	4.20469	24.4813	3.02441	2.58002	-0.791631	11.9979	18.6175	11.0652	4.20469
	2.96875	12.7004	4.93656	28.201	2.69089	3.00401	5.11106	10.6448	17.5175	12.7004	4.93656
	2.98542	14.2584	5.40548	29.3421	8.67644	11.804	6.9918	10.4585	18.8389	14.2584	5.40548
	3.00208	14.8103	5.82946	29.6135	14.9218	14.6365	8.58893	10.9732	18.0092	14.8103	5.82946
	3.01875	14.9321	5.44438	29.4734	20.1295	15.4748	8.31937	10.4705	17.8683	14.9321	5.44438
	3.03542	14.9282	6.02761	29.6607	22.335	14.6046	8.97848	10.3612	18.3594	14.9282	6.02761
	3.05208	14.3229	6.34597	29.1797	23.2265	15.1928	9.60143	10.6188	18.0474	14.3229	6.34597
	3.06875	15.2816	6.61059	29.1894	22.5033	15.7369	9.05212	9.9871	16.8975	15.2816	6.61059
	3.08542	14.8065	5.95163	28.2031	23.5718	14.5253	8.32506	11.4987	16.4583	14.8065	5.95163
	3.10208	14.7262	6.44306	28.9876	22.7129	14.6319	9.16235	11.3265	16.2932	14.7262	6.44306
	3.11875	14.2493	6.15476	28.8353	22.4186	14.6462	8.49049	24.8743	16.7689	14.2493	6.15476
	3.13542	14.1144	5.41285	28.3441	21.8311	14.5299	8.40255	29.8809	16.1595	14.1144	5.41285
	3.15208	14.3716	5.43706	27.6851	21.9335	13.9565	8.85036	30.6254	16.1729	14.3716	5.43706
	3.16875	14.1326	5.32875	27.4646	22.2159	14.2875	9.18	30.795	15.9576	14.1326	5.32875
	3.18542	14.0758	5.0484	28.0487	21.8661	13.7315	8.58525	30.8793	15.091	14.0758	5.0484
	3.20208	13.7128	4.84328	27.0023	20.9791	13.6762	8.41525	30.7163	15.0009	13.7128	4.84328
	3.21875	14.0923	5.15763	26.6433	21.0762	13.2955	7.74679	29.87	15.1299	14.0923	5.15763
	3.23542	12.9479	4.72243	26.7957	20.4543	12.6139	8.25246	30.1533	13.9695	12.9479	4.72243
	3.25208	14.1101	4.65868	26.5954	20.7524	12.6984	7.36516	30.1662	14.4801	14.1101	4.65868
	3.26875	12.8959	4.83393	25.1723	19.6869	13.2954	7.56428	29.1878	13.5547	12.8959	4.83393
	3.28542	13.5314	4.56276	26.2386	19.0405	12.6016	7.1255	28.6693	14.2767	13.5314	4.56276
	3.30208	13.4988	4.404	25.9252	19.8895	12.6491	6.81755	28.618	13.7355	13.4988	4.404
	3.31875	13.1281	4.07987	25.2502	18.8438	12.0499	7.21199	28.0553	13.5107	13.1281	4.07987
	3.33542	12.866	3.70869	24.9793	18.829	11.9651	6.74997	27.0396	13.2021	12.866	3.70869
	3.35208	12.1946	4.00646	24.6393	18.1137	12.2188	6.70436	27.3043	13.5148	12.1946	4.00646
	3.36875	12.6336	3.54251	24.3657	18.0811	11.4818	6.54286	26.9752	13.2096	12.6336	3.54251
	3.38542	12.1828	3.42912	24.5917	17.7306	11.2791	6.25955	27.7382	13.5541	12.1828	3.42912
	3.40208	12.1655	3.51682	24.6483	17.0228	12.0046	5.85379	26.8108	11.9046	12.1655	3.51682
	3.41875	12.2464	2.92701	23.2931	17.3007	11.126	6.32499	26.5667	12.4076	12.2464	2.92701
	3.43542	12.4705	3.66005	24.0469	17.3109	11.2681	5.78712	25.3305	12.0274	12.4705	3.66005
	3.45208	11.7655	2.6481	23.6059	16.8912	10.9837	5.2765	25.7899	12.4687	11.7655	2.6481
	3.46875	11.7965	2.43293	23.9224	17.0217	10.6602	5.26612	25.5967	11.2027	11.7965	2.43293
	3.48542	12.0517	3.09035	22.7448	16.6214	10.2401	5.48073	24.6991	11.5187	12.0517	3.09035
	3.50208	11.6032	2.62038	23.0075	16.7537	10.6139	5.4162	24.7064	10.8966	11.6032	2.62038
	3.51875	11.5606	2.59349	22.8662	14.9692	10.3823	4.87665	25.0383	10.4116	11.5606	2.59349
	3.53542	11.9886	2.97559	22.8863	15.3673	10.7463	4.74665	24.898	10.7575	11.9886	2.97559
	3.55208	10.7702	2.04763	23.415	14.8303	10.1151	4.74665	24.7406	10.365	10.7702	2.04763
	3.56875	10.6397	2.4919	21.8808	15.9019	10.2609	4.60945	23.5378	10.2848	10.6397	2.4919
	3.58542	11.5869	2.50952	22.2479	14.5255	9.72945	4.26238	23.0093	10.5486	11.5869	2.50952
	3.60208	10.7038	2.09702	22.3025	13.935	9.39427	4.32546	23.5876	10.4349	10.7038	2.09702
	3.61875	10.8735	2.00265	22.4447	14.4098	9.3753	4.04674	23.2913	9.80519	10.8735	2.00265
	3.63542	11.3897	2.62745	22.0594	14.5187	9.31948	4.29428	22.7864	9.3808	11.3897	2.62745
	3.65208	10.5803	1.9886	21.2363	14.1179	8.8035	3.73176	23.0351	9.95262	10.5803	1.9886
	3.66875	10.8131	2.11766	20.7114	13.0689	9.26234	4.15231	22.4605	9.09573	10.8131	2.11766
	3.68542	10.1652	1.57509	20.9586	13.1414	9.01013	3.91261	22.4576	8.88616	10.1652	1.57509
	3.70208	10.6801	1.56987	21.3534	12.8645	9.19697	3.85897	22.1157	8.2882	10.6801	1.56987
	3.71875	10.0067	1.27556	21.4318	12.2369	8.62198	3.39448	22.0306	8.64616	10.0067	1.27556
	3.73542	9.55247	1.52536	20.5645	12.8661	8.60637	3.50603	21.54	8.07006	9.55247	1.52536
	3.75208	9.80275	1.70189	20.8956	12.123	8.46324	3.01829	21.7678	8.38147	9.80275	1.70189
	3.76875	9.59632	1.08456	20.7221	12.5266	8.12588	3.05316	21.034	7.90063	9.59632	1.08456
	3.78542	10.0596	1.26256	21.1629	12.0739	8.0284	2.78567	21.139	8.6219	10.0596	1.26256
	3.80208	9.45567	1.13536	19.6355	11.6677	8.27268	2.84703	20.8459	7.72461	9.45567	1.13536
	3.81875	9.96401	1.30838	20.4806	11.3106	8.50908	2.87138	20.8836	7.97403	9.96401	1.30838
	3.83542	9.27781	1.24449	19.9771	11.7967	8.30318	2.3166	21.1394	8.07143	9.27781	1.24449
	3.85208	9.68781	1.16658	20.1783	11.0837	7.79109	3.30374	20.1577	7.85021	9.68781	1.16658
	3.86875	9.61926	0.880097	19.1799	11.0564	8.26585	2.9049	19.7434	6.9216	9.61926	0.880097
	3.88542	9.39214	0.788193	19.7459	11.4336	7.317	2.61914	20.0707	6.98691	9.39214	0.788193
	3.90208	9.45294	0.603399	19.0601	10.6414	7.02221	2.79411	20.0167	7.33724	9.45294	0.603399
	3.91875	9.73287	0.715993	19.1376	10.6297	7.35791	2.67223	19.9295	6.95633	9.73287	0.715993
	3.93542	9.41427	0.491919	18.4329	10.5369	6.97116	2.34033	20.0417	7.13597	9.41427	0.491919
	3.95208	8.4478	0.806124	18.9068	10.2773	6.64674	2.29307	19.6178	6.3595	8.4478	0.806124
	3.96875	9.09748	0.797409	19.0314	10.434	7.30436	2.2068	19.3216	6.72374	9.09748	0.797409
	3.98542	8.13111	0.583858	18.3442	10.0991	6.94206	2.03358	19.3631	6.30861	8.13111	0.583858
	4.00208	9.15097	0.882299	18.5437	10.6841	6.71513	1.69388	18.8325	6.34262	9.15097	0.882299
	4.01875	8.80374	0.597084	17.8271	10.2577	6.70207	1.64663	18.4413	6.21418	8.80374	0.597084
	4.03542	8.38421	0.0423313	18.2787	9.89659	6.57696	2.05593	18.6464	6.57494	8.38421	0.0423313
	4.05208	8.36627	0.304098	17.3559	9.95685	6.84623	1.76758	18.611	5.57414	8.36627	0.304098
	4.06875	8.63957	0.466127	17.567	9.21289	7.12622	1.82548	18.4297	5.09483	8.63957	0.466127
	4.08542	8.01866	0.354829	17.9324	8.76129	6.63927	1.79141	18.4659	6.21839	8.01866	0.354829
	4.10208	8.75019	0.214476	18.2137	8.78881	6.43773	1.0256	18.1709	5.92715	8.75019	0.214476
	4.11875	8.31145	0.293588	17.5236	9.60035	6.32743	1.41166	17.9331	5.72749	8.31145	0.293588
	4.13542	8.07486	0.477366	17.2252	9.35371	6.46757	1.96703	17.1653	5.09986	8.07486	0.477366
	4.15208	7.82067	-0.158918	17.0192	8.40528	5.95222	1.2415	17.789	4.69824	7.82067	-0.158918
	4.16875	8.05095	0.336995	17.0741	9.13423	5.69933	0.737354	18.1942	4.4244	8.05095	0.336995
	4.18542	7.65024	0.510628	17.0521	7.99585	6.16636	0.996587	17.8963	4.91558	7.65024	0.510628
	4.20208	7.47506	0.106601	16.7091	8.50089	6.38961	0.979033	17.0485	4.45898	7.47506	0.106601
	4.21875	7.93346	-0.378436	17.4763	8.08355	5.4828	1.04882	16.6448	4.97118	7.93346	-0.378436
	4.23542	7.62424	-0.0626659	17.1588	7.67202	5.30838	1.13533	17.3277	4.47563	7.62424	-0.0626659
	4.25208	7.5074	0.0477852	16.3316	8.16322	5.47617	1.13328	16.8372	4.54771	7.5074	0.0477852
	4.26875	7.7309	-0.205292	16.4905	8.41436	5.95161	0.984298	17.3896	4.42814	7.7309	-0.205292
	4.28542	7.60552	-0.185246	16.2941	7.60515	5.75499	1.04848	16.7598	4.08773	7.60552	-0.185246
	4.30208	6.97397	-0.41663	16.6915	7.50174	5.65713	0.653441	16.6777	4.66353	6.97397	-0.41663
	4.31875	6.9561	-0.526101	16.0984	7.43883	5.83566	0.881876	17.0402	4.40786	6.9561	-0.526101
	4.33542	7.33887	-0.0848637	16.1087	7.06828	5.45946	1.0917	16.3638	4.45204	7.33887	-0.0848637
	4.35208	6.45441	-0.472815	15.3298	7.34081	4.86545	0.972913	16.1485	4.17037	6.45441	-0.472815
	4.36875	7.4953	-0.498728	16.3305	7.75403	4.86527	0.857688	16.1975	3.57833	7.4953	-0.498728
	4.38542	6.89536	-0.853032	14.3555	6.96495	5.41364	0.527397	16.6206	3.21836	6.89536	-0.853032
	4.40208	6.39245	-0.411987	15.5341	6.94553	5.20931	0.641835	16.0987	3.31416	6.39245	-0.411987
	4.41875	6.98632	-0.252503	15.3047	6.78138	5.71172	0.412853	15.9478	4.03627	6.98632	-0.252503
	4.43542	6.65201	-0.901157	15.9823	6.57187	4.82667	0.220165	15.9131	2.96972	6.65201	-0.901157
	4.45208	7.11117	-0.466414	15.2521	6.46607	4.87627	0.0722816	15.9834	3.72611	7.11117	-0.466414
	4.46875	6.38848	-0.603162	15.3761	6.12349	5.32935	0.436195	15.6738	3.26412	6.38848	-0.603162
	4.48542	6.87817	-0.70745	15.7037	6.08289	4.64527	0.625333	15.8498	2.74333	6.87817	-0.70745
	4.50208	6.63282	-1.31866	14.5686	6.92707	4.24283	-0.349029	15.4992	3.50391	6.63282	-1.31866
	4.51875	6.22929	-1.00247	14.755	6.49304	5.31355	-0.111316	15.5999	3.48075	6.22929	-1.00247
	4.53542	6.85428	-1.01101	14.6551	5.96528	4.68897	0.0284344	14.7656	2.85729	6.85428	-1.01101
	4.55208	6.62249	-1.15141	14.5146	6.5273	5.01619	0.0445637	15.5704	2.68221	6.62249	-1.15141
	4.56875	6.2762	-0.79998	14.7167	5.94651	5.06808	-0.163132	15.6169	3.18847	6.2762	-0.79998
	4.58542	6.72446	-0.338254	14.0376	5.11679	4.51215	0.379081	14.7726	2.17409	6.72446	-0.338254
	4.60208	6.31026	-0.480302	14.5876	6.10055	4.74268	-0.493589	15.08	3.23015	6.31026	-0.480302
	4.61875	6.41438	-0.709243	14.1793	5.29352	4.55719	-0.173204	15.8232	3.32624	6.41438	-0.709243
	4.63542	5.93234	-0.791607	14.2299	5.22001	4.13069	-0.288003	15.2519	2.57141	5.93234	-0.791607
	4.65208	5.98779	-1.01219	14.1364	5.77102	4.50969	-0.0354732	15.0671	2.7587	5.98779	-1.01219
	4.66875	6.03508	-1.12719	14.1995	4.99902	4.35683	0.0671005	14.3809	3.27088	6.03508	-1.12719
	4.68542	5.77954	-0.636006	14.0719	5.8665	4.07088	-0.370412	15.2193	2.48062	5.77954	-0.636006
	4.70208	5.92255	-0.874508	14.4481	4.73125	4.731	-0.000810242	14.4793	2.32324	5.92255	-0.874508
	4.71875	5.98491	-0.83274	13.9279	4.81416	4.12184	-0.205768	14.4834	2.35436	5.98491	-0.83274
	4.73542	6.45328	-1.23597	14.1513	5.38175	4.73271	-0.103366	14.4842	2.41239	6.45328	-1.23597
	4.75208	5.28234	-1.2762	13.415	5.31069	4.69347	-0.166037	14.2638	2.08174	5.28234	-1.2762
	4.76875	5.789	-0.723138	14.1676	5.0464	3.62368	-0.105309	13.8487	2.1192	5.789	-0.723138
	4.78542	6.39731	-1.6748	13.4473	5.16313	3.77402	-0.288677	14.8375	2.35566	6.39731	-1.6748
	4.80208	5.7346	-1.19259	14.2277	4.98492	4.15391	-0.0489311	14.4434	1.6303	5.7346	-1.19259
	4.81875	5.73441	-0.83224	13.6469	5.03504	3.63041	-0.479617	14.0886	1.75599	5.73441	-0.83224
	4.83542	5.06824	-1.4052	14.0058	4.75056	3.9119	-0.206909	13.5261	1.77758	5.06824	-1.4052
	4.85208	6.03007	-1.11278	13.1976	4.11613	3.87689	-0.317014	13.9235	1.49108	6.03007	-1.11278
	4.86875	5.5637	-1.15314	13.8067	4.14456	3.59649	-1.13354	14.1016	1.76375	5.5637	-1.15314
	4.88542	5.3781	-1.46556	13.2075	5.23529	3.68245	-0.689352	13.5535	2.00305	5.3781	-1.46556
	4.90208	5.6545	-1.27076	13.1129	11.3244	3.44715	-0.803243	14.1001	2.29574	5.6545	-1.27076
	4.91875	5.74872	-1.50841	12.9959	16.443	3.36418	-0.492593	13.2336	1.70402	5.74872	-1.50841
	4.93542	5.44526	-1.4095	13.392	20.7498	3.64056	-0.87752	13.6561	1.49263	5.44526	-1.4095
	4.95208	5.04938	4.70632	13.0556	21.5852	3.27823	0.682569	13.9865	2.17372	5.04938	4.70632
	4.96875	5.61357	6.7263	12.8032	22.7494	3.70239	2.92938	13.7151	1.94119	5.61357	6.7263
	4.98542	5.52863	8.44275	13.2542	22.5975	3.64508	9.71981	13.8616	7.57849	5.52863	8.44275
	5.00208	9.17379	7.86722	12.774	23.0707	4.46663	10.9126	13.6241	13.2447	9.17379	7.86722
	5.01875	14.307	8.61495	12.2177	22.0484	11.0019	11.0089	13.6908	16.2071	14.307	8.61495
	5.03542	16.5638	8.93023	15.9044	21.8255	13.8879	11.4996	13.5031	16.9135	16.5638	8.93023
	5.05208	18.2066	8.9517	26.1258	21.4413	15.0589	10.7309	13.6257	17.7177	18.2066	8.9517
	5.06875	18.2668	8.4346	29.402	21.9529	15.0052	11.0207	13.655	18.0917	18.2668	8.4346
	5.08542	18.794	8.96996	31.0878	20.7718	15.0859	10.4955	15.9206	18.1973	18.794	8.96996
	5.10208	17.9668	8.58097	32.4106	20.6331	15.3981	10.924	24.9792	17.8957	17.9668	8.58097
	5.11875	17.5916	8.45093	32.6532	21.8255	15.5335	9.99199	29.5278	18.6941	17.5916	8.45093
	5.13542	18.8881	8.14798	33.5516	19.7686	14.8436	10.4778	29.9001	17.0269	18.8881	8.14798
	5.15208	18.462	7.70137	32.8954	19.5385	14.5821	10.0224	30.9362	17.6615	18.462	7.70137
	5.16875	18.0746	7.57312	33.2133	20.0284	14.8387	9.29862	30.7077	17.9198	18.0746	7.57312
	5.18542	17.9725	7.48158	33.1657	19.6485	14.4823	8.82767	30.5449	17.1892	17.9725	7.48158
	5.20208	17.7038	7.42587	32.2422	19.6719	14.5325	8.92657	31.0391	16.6364	17.7038	7.42587
	5.21875	17.9391	7.36132	32.5201	19.4511	14.0161	8.62451	30.312	17.0079	17.9391	7.36132
	5.23542	17.09	7.01278	32.9776	19.3896	13.6961	8.35206	29.7688	16.6204	17.09	7.01278
	5.25208	17.4872	7.10911	31.4321	18.2953	13.535	8.12637	29.6266	16.627	17.4872	7.10911
	5.26875	16.8359	6.09588	31.7591	18.1759	13.6688	8.22847	29.9582	16.1852	16.8359	6.09588
	5.28542	16.6404	6.73446	32.3418	17.8575	13.1584	8.17493	28.6445	16.1459	16.6404	6.73446
	5.30208	16.7461	6.70612	30.8525	17.7087	12.2519	7.8121	29.0359	15.3412	16.7461	6.70612
	5.31875	17.0536	6.01338	31.219	18.2527	12.5388	7.36458	28.499	15.3533	17.0536	6.01338
	5.33542	17.091	5.85179	31.1095	17.9088	13.2071	7.64511	27.4868	14.3095	17.091	5.85179
	5.35208	16.2852	5.27144	30.9196	17.5008	11.8273	6.75047	27.7838	14.1564	16.2852	5.27144
	5.36875	15.9283	5.44906	31.2182	16.9528	12.8134	7.55892	27.2749	13.7579	15.9283	5.44906
	5.38542	16.644	5.92325	30.6899	16.7498	12.0291	6.93137	27.7468	14.4467	16.644	5.92325
	5.40208	16.4291	4.88644	30.0704	17.0395	12.2927	6.83066	27.1584	13.8924	16.4291	4.88644
	5.41875	16.1373	5.3276	30.1905	16.5381	12.1891	6.57017	27.5218	13.5255	16.1373	5.3276
	5.43542	15.2018	5.47208	31.0326	15.7384	12.2537	6.61653	26.714	12.8883	15.2018	5.47208
	5.45208	15.8635	5.12595	30.7535	15.7505	11.7318	5.71557	26.5864	12.9716	15.8635	5.12595
	5.46875	16.1039	4.63593	29.682	14.8706	11.2888	5.7541	27.055	12.6087	16.1039	4.63593
	5.48542	15.0951	4.7155	29.376	15.7168	11.3244	5.86526	26.2899	13.1145	15.0951	4.7155
	5.50208	15.5408	4.56455	29.1955	15.2363	10.6954	5.58459	25.6234	12.4731	15.5408	4.56455
	5.51875	15.0559	5.07473	28.6222	14.1833	10.6635	5.51506	26.1566	12.6894	15.0559	5.07473
	5.53542	14.8549	4.91143	29.5449	14.6086	11.2866	5.73293	24.6308	12.0977	14.8549	4.91143
	5.55208	15.3928	3.69297	28.6065	14.3865	10.9332	5.02306	25.1309	12.4665	15.3928	3.69297
	5.56875	14.2039	4.13083	28.9957	14.4984	9.89354	5.49106	24.9501	11.567	14.2039	4.13083
	5.58542	15.2201	4.41911	28.312	14.4044	10.8795	5.31424	24.2418	11.1612	15.2201	4.41911
	5.60208	15.1945	3.48884	28.7298	13.8459	10.392	5.02486	24.7936	10.9601	15.1945	3.48884
	5.61875	14.5215	3.91176	28.5431	13.5884	10.1864	4.62211	24.2581	11.4921	14.5215	3.91176
	5.63542	14.7177	3.52506	28.4713	13.4961	9.8891	5.04676	23.5948	10.8341	14.7177	3.52506
	5.65208	14.1919	3.49757	27.3046	13.7779	9.73427	4.82223	23.6538	10.0401	14.1919	3.49757
	5.66875	14.6904	3.29348	26.6861	12.9786	9.95544	3.89782	24.1227	10.1573	14.6904	3.29348
	5.68542	14.7283	3.81629	27.5631	12.7044	9.96155	4.22018	23.7479	10.9361	14.7283	3.81629
	5.70208	14.4222	3.18083	27.5939	12.6673	10.0566	4.13816	23.2725	10.0159	14.4222	3.18083
	5.71875	13.9322	3.37743	27.0297	13.4807	9.00927	3.98773	22.7951	10.3786	13.9322	3.37743
	5.73542	13.6206	2.41253	26.3719	12.379	9.33779	4.25933	22.7109	9.69993	13.6206	2.41253
	5.75208	13.3306	3.36419	27.2128	12.3003	9.52237	4.1315	23.268	9.59513	13.3306	3.36419
	5.76875	14.0986	3.15993	26.5296	11.656	9.44619	3.64181	23.1472	9.09794	14.0986	3.15993
	5.78542	13.7289	2.53622	26.1134	11.8169	9.06759	3.81763	22.3118	9.09412	13.7289	2.53622
	5.80208	13.9875	2.39683	27.6092	11.5278	9.13621	3.59952	22.5014	8.5838	13.9875	2.39683
	5.81875	13.8397	2.71141	25.9389	11.1284	8.43091	3.24041	22.4664	9.90108	13.8397	2.71141
	5.83542	13.5451	2.4276	25.8952	11.7541	8.56145	3.13868	21.9132	9.00416	13.5451	2.4276
	5.85208	13.6602	2.69886	25.1357	11.0754	8.30997	3.49791	21.5324	8.85835	13.6602	2.69886
	5.86875	13.2576	2.5947	25.9041	10.9406	8.39129	3.60303	21.709	8.51632	13.2576	2.5947
	5.88542	12.9506	2.2241	25.1868	10.9707	8.51051	3.16372	21.6944	7.536	12.9506	2.2241
	5.90208	12.5801	1.76561	24.9674	10.948	8.73845	3.1898	21.5752	7.93506	12.5801	1.76561
	5.91875	12.8466	1.77206	24.6245	10.6844	8.5949	2.6553	20.6305	8.08274	12.8466	1.77206
	5.93542	13.0007	2.13954	25.3612	10.5013	8.35926	3.14691	21.1743	7.73005	13.0007	2.13954
	5.95208	12.7365	2.16233	24.3026	10.8284	8.10892	2.42715	20.9989	7.94165	12.7365	2.16233
	5.96875	12.8595	2.60026	25.0632	9.76451	7.46625	3.24027	21.1345	7.46581	12.8595	2.60026
	5.98542	12.5705	1.78471	24.1545	10.724	7.6033	2.04927	20.9854	7.14592	12.5705	1.78471
	6.00208	12.0854	1.45126	23.9419	10.4408	8.03959	2.94671	20.3557	8.20809	12.0854	1.45126
	6.01875	12.5879	1.81669	23.9826	10.0247	7.35756	1.984	19.2752	6.80741	12.5879	1.81669
	6.03542	12.3215	0.656387	24.2717	9.67967	7.762	2.38744	19.7616	7.32824	12.3215	0.656387
	6.05208	12.0097	1.71546	23.8667	9.48366	7.87925	2.59685	20.3092	6.80685	12.0097	1.71546
	6.06875	11.4508	1.11493	24.1564	9.38223	7.89431	2.3973	20.6505	7.20322	11.4508	1.11493
	6.08542	12.081	1.54485	24.1416	9.44762	7.30173	1.87041	19.7058	6.24765	12.081	1.54485
	6.10208	12.4176	1.2616	23.922	9.17875	7.59645	1.55794	20.3883	6.75854	12.4176	1.2616
	6.11875	11.6285	1.67215	23.5765	9.10341	7.07718	2.44716	19.4584	6.79337	11.6285	1.67215
	6.13542	12.0383	0.954617	22.7932	9.22588	6.74652	1.87477	19.1447	6.44925	12.0383	0.954617
	6.15208	11.9016	1.51247	22.5511	9.1757	7.86175	1.80638	20.1494	6.16962	11.9016	1.51247
	6.16875	11.2033	0.965018	22.3702	8.29834	6.85905	2.04533	20.5135	6.37144	11.2033	0.965018
	6.18542	11.51	1.1054	23.201	8.42945	7.31626	1.4953	19.6429	6.02702	11.51	1.1054
	6.20208	11.19	0.946109	23.0186	8.90535	6.74976	1.76228	19.9881	5.65373	11.19	0.946109
	6.21875	11.6099	0.970407	21.8059	8.73505	7.11158	2.06333	19.7065	6.06346	11.6099	0.970407
	6.23542	11.1899	0.457735	22.1321	8.07363	7.04976	2.2351	19.8707	5.41836	11.1899	0.457735
	6.25208	11.7779	0.730972	22.1498	7.22805	7.14781	1.51919	20.6041	5.7981	11.7779	0.730972
	6.26875	11.565	0.58823	22.1988	8.2584	6.99635	1.12792	19.7059	5.5946	11.565	0.58823
	6.28542	11.207	1.06672	21.5401	8.85155	6.43915	1.63079	19.144	5.86445	11.207	1.06672
	6.30208	10.9387	0.461605	22.344	8.09888	6.76623	1.3172	20.4479	6.1901	10.9387	0.461605
	6.31875	11.0164	0.447882	21.5938	7.89119	6.78511	1.33799	19.4227	5.69034	11.0164	0.447882
	6.33542	11.2179	0.496679	21.3191	8.18442	6.26674	1.32514	19.7254	5.43751	11.2179	0.496679
	6.35208	11.0192	0.244471	21.6126	7.74976	6.60308	1.34967	18.996	5.29281	11.0192	0.244471
	6.36875	10.1538	0.362257	22.0037	7.18704	5.37418	0.905181	18.9119	4.91454	10.1538	0.362257
	6.38542	10.4882	0.565045	20.3453	7.48076	5.70312	1.09131	18.597	4.76285	10.4882	0.565045
	6.40208	9.48214	0.652094	20.7772	7.66082	6.52175	0.687913	18.9227	4.73615	9.48214	0.652094
	6.41875	10.1699	0.361684	20.6338	7.58934	6.19552	1.0649	19.0982	4.97289	10.1699	0.361684
	6.43542	10.5557	0.358924	21.0385	7.53947	6.199	0.856675	19.036	5.14304	10.5557	0.358924
	6.45208	10.3736	0.318357	21.6327	6.33393	6.47152	0.869827	18.0389	4.72846	10.3736	0.318357
	6.46875	10.5604	0.344178	20.867	6.47299	5.38743	1.31147	18.7708	4.6902	10.5604	0.344178
	6.48542	9.80121	0.0194386	19.4571	6.57601	5.80897	0.972051	18.2009	4.80881	9.80121	0.0194386
	6.50208	10.6109	0.432711	20.2326	6.53549	5.45486	1.09614	18.2087	5.16704	10.6109	0.432711
	6.51875	9.67879	0.307044	19.8782	6.9578	5.39336	1.04094	17.8223	5.2529	9.67879	0.307044
	6.53542	10.2333	-0.0762619	19.8665	6.23999	5.65496	0.744533	18.1509	4.53106	10.2333	-0.0762619
	6.55208	10.428	0.260491	20.061	6.77388	5.4554	0.633902	18.0432	4.4368	10.428	0.260491
	6.56875	10.1657	-0.12864	19.2252	6.15189	5.18488	0.693382	18.1982	3.6436	10.1657	-0.12864
	6.58542	9.54871	0.191444	19.8229	7.34011	5.62046	0.376149	17.3681	4.30831	9.54871	0.191444
	6.60208	9.99445	-0.0210987	20.3622	5.95279	5.54417	0.689357	17.3007	3.64636	9.99445	-0.0210987
	6.61875	9.57386	-0.394728	19.9345	5.99415	5.78875	0.469498	17.4295	4.36637	9.57386	-0.394728
	6.63542	9.75773	-0.241979	19.5426	6.6302	5.50798	0.89773	17.2116	4.04834	9.75773	-0.241979
	6.65208	9.76233	-0.43098	19.103	6.32815	5.35929	0.30333	17.0564	4.10438	9.76233	-0.43098
	6.66875	9.45716	-0.424289	19.5718	6.23903	4.90306	0.384311	17.5623	3.67729	9.45716	-0.424289
	6.68542	9.52247	-0.45577	18.8148	6.07942	5.05454	0.00839844	17.6912	3.9078	9.52247	-0.45577
	6.70208	9.50276	-0.13784	18.9566	5.8146	4.90792	0.405208	17.3183	2.97014	9.50276	-0.13784
	6.71875	8.7516	0.084951	18.6917	5.87517	5.22388	-0.104911	16.7141	4.08362	8.7516	0.084951
	6.73542	9.06515	-0.7236	18.9699	5.66212	5.15767	0.293354	16.9869	3.79765	9.06515	-0.7236
	6.75208	8.8491	-0.441234	18.6779	5.55018	5.25482	0.651007	17.0817	3.99456	8.8491	-0.441234
	6.76875	9.40425	-0.14251	18.3507	5.39949	4.677	0.281046	17.0295	3.88265	9.40425	-0.14251
	6.78542	8.59714	0.215144	18.0105	5.68588	4.77031	0.110716	16.7841	3.35767	8.59714	0.215144
	6.80208	9.67771	-0.303311	18.4803	5.27939	4.87136	0.364289	16.2468	3.67206	9.67771	-0.303311
	6.81875	9.10449	-0.664839	17.9583	5.48716	4.61742	-0.127764	16.0787	3.55822	9.10449	-0.664839
	6.83542	8.86243	-0.57311	18.3851	5.49418	4.8609	0.20544	16.2347	3.69735	8.86243	-0.57311
	6.85208	8.46948	-0.0227898	17.6194	5.93883	4.87108	0.0756134	16.6989	3.30181	8.46948	-0.0227898
	6.86875	8.75254	-0.459615	17.926	5.407	4.89296	0.402268	16.1362	3.6859	8.75254	-0.459615
	6.88542	8.78077	-0.398294	18.0667	4.71507	4.95475	0.0926792	16.652	3.44405	8.78077	-0.398294
	6.90208	8.03817	3.44099	17.7533	5.63702	5.02329	-0.679955	16.1904	2.78793	8.03817	3.44099
	6.91875	8.40809	5.01132	17.6864	4.98804	4.78143	0.0596897	22.4928	3.0105	8.40809	5.01132
	6.93542	8.73501	5.91662	17.7862	6.09144	4.54577	-0.316548	27.5038	4.55344	8.73501	5.91662
	6.95208	10.9179	7.01999	19.7388	12.3779	5.16372	-0.34496	32.5471	10.0866	10.9179	7.01999
	6.96875	14.0251	7.24259	30.6027	17.8706	4.61628	0.440578	33.5717	16.5934	14.0251	7.24259
	6.98542	15.7487	8.29721	33.3061	21.2011	4.22262	0.330122	34.2329	18.2592	15.7487	8.29721
	7.00208	18.1169	8.50322	34.0429	23.0193	4.17872	0.235619	34.197	19.8037	18.1169	8.50322
	7.01875	17.9803	8.3939	35.2702	24.3312	4.68368	6.17732	34.0177	20.9672	17.9803	8.3939
	7.03542	19.3467	8.0404	35.0556	23.9896	4.47508	7.31427	33.6257	20.7903	19.3467	8.0404
	7.05208	17.9267	8.2621	35.9086	24.4682	4.39684	9.37849	33.8372	20.5173	17.9267	8.2621
	7.06875	18.273	7.81611	35.1538	24.5812	4.70014	10.0908	33.4036	21.2441	18.273	7.81611
	7.08542	17.9804	7.85991	35.8538	23.8649	4.51283	9.70927	32.677	20.2903	17.9804	7.85991
	7.10208	18.467	8.06319	35.2662	23.7862	9.37924	9.49854	32.2481	20.3787	18.467	8.06319
	7.11875	18.6887	7.68285	35.5938	23.5572	13.1772	9.94757	32.8079	20.5351	18.6887	7.68285
	7.13542	17.8369	7.38782	34.6932	23.1746	14.6248	8.87546	32.658	20.3346	17.8369	7.38782
	7.15208	18.2444	7.31436	35.7949	22.7193	14.7367	9.21247	32.1329	19.9106	18.2444	7.31436
	7.16875	17.6517	7.33943	34.7449	22.8479	15.3711	9.51314	32.771	20.256	17.6517	7.33943
	7.18542	18.2873	7.18411	35.2984	23.0677	15.6833	8.93798	31.9001	19.4522	18.2873	7.18411
	7.20208	17.9512	6.76935	34.1897	22.4436	15.0446	9.34383	31.4736	19.8077	17.9512	6.76935
	7.21875	17.8208	7.32641	34.2134	21.9433	15.5956	8.3815	31.1692	18.7337	17.8208	7.32641
	7.23542	17.1824	7.15383	34.3904	21.5327	15.8335	8.60095	31.2386	18.7293	17.1824	7.15383
	7.25208	17.47	5.80785	33.5158	21.0659	15.6657	8.03437	30.536	18.2153	17.47	5.80785
	7.26875	16.9564	6.49185	34.532	21.0692	15.2982	8.70526	30.4284	18.9551	16.9564	6.49185
	7.28542	16.9989	5.75777	32.9735	20.6632	14.1245	8.27997	30.0552	17.3453	16.9989	5.75777
	7.30208	17.3488	6.29521	33.2241	21.4039	14.1961	7.47654	29.8805	17.4407	17.3488	6.29521
	7.31875	17.1787	5.5866	33.4854	20.5747	14.7545	7.62105	30.1177	16.8718	17.1787	5.5866
	7.33542	16.6367	5.83269	33.5999	19.8676	14.7023	7.412	30.3108	16.5707	16.6367	5.83269
	7.35208	16.2093	5.00965	33.3873	19.7907	13.8054	7.53934	29.3887	17.2209	16.2093	5.00965
	7.36875	16.6595	4.79041	32.6902	20.2143	13.5693	7.01365	29.5429	16.0241	16.6595	4.79041
	7.38542	16.2516	5.39557	32.6828	18.9188	13.5658	7.25098	29.5929	16.5286	16.2516	5.39557
	7.40208	16.1354	5.03945	32.1506	19.4962	13.6598	6.19182	29.6408	16.5062	16.1354	5.03945
	7.41875	16.6052	4.88295	32.4753	18.6754	13.7193	7.08822	28.7131	15.6183	16.6052	4.88295
	7.43542	16.5954	4.91307	33.2093	18.655	13.4595	6.62307	28.7763	15.6519	16.5954	4.91307
	7.45208	16.0812	4.96714	32.3148	18.9041	12.4686	6.3447	28.2677	15.9042	16.0812	4.96714
	7.46875	16.0291	4.88616	31.2035	18.2702	13.2355	6.20773	28.1062	15.7104	16.0291	4.88616
	7.48542	15.8033	4.24016	31.355	18.2031	13.2632	6.18473	27.6758	15.41	15.8033	4.24016
	7.50208	16.3314	4.42573	31.3905	17.0888	13.0686	6.11492	27.5663	14.4259	16.3314	4.42573
	7.51875	15.4797	3.84156	31.5871	17.466	13.0636	5.33009	27.3995	14.6002	15.4797	3.84156
	7.53542	15.382	3.8117	30.4856	17.3681	12.0917	5.3907	27.0626	14.7206	15.382	3.8117
	7.55208	15.747	3.81785	31.7634	17.0215	12.4582	5.78581	27.8117	14.3163	15.747	3.81785
	7.56875	15.871	4.16394	31.23	16.4457	12.4001	5.34605	27.0324	14.5866	15.871	4.16394
	7.58542	15.0836	3.79093	30.9534	17.1035	12.2287	5.27717	26.9399	13.7117	15.0836	3.79093
	7.60208	15.6093	3.97095	30.6935	15.8425	11.4728	4.90108	26.5281	13.6334	15.6093	3.97095
	7.61875	15.7296	3.56547	31.1682	16.662	11.2784	4.30913	26.5354	14.2168	15.7296	3.56547
	7.63542	15.2175	3.63331	30.8434	15.4191	11.7689	5.15668	26.6522	12.9775	15.2175	3.63331
	7.65208	14.9209	3.96331	29.2481	16.0379	11.9851	4.73535	25.7789	13.4671	14.9209	3.96331
	7.66875	14.8324	3.78241	30.275	15.3321	11.713	5.4189	25.9542	12.9138	14.8324	3.78241
	7.68542	14.5449	3.34251	30.5975	15.8947	11.969	4.39726	25.9677	12.5658	14.5449	3.34251
	7.70208	15.2238	3.70454	29.4999	15.6591	11.2601	4.65294	25.7624	12.4093	15.2238	3.70454
	7.71875	15.5451	3.41268	29.2535	15.6414	10.9608	3.94669	25.934	12.6259	15.5451	3.41268
	7.73542	14.9108	3.23349	29.5819	15.5751	11.3084	4.25464	25.2828	12.019	14.9108	3.23349
	7.75208	14.9764	2.65519	28.6536	14.5322	11.2886	4.40638	24.8975	12.1788	14.9764	2.65519
	7.76875	14.9049	3.52566	29.9081	14.5423	11.3666	3.77117	25.4335	12.3017	14.9049	3.52566
	7.78542	14.348	3.2786	28.6142	14.4401	10.5608	3.47499	25.1891	13.2215	14.348	3.2786
	7.80208	14.6827	2.51809	28.9176	14.1561	10.4638	3.57421	24.7582	12.1671	14.6827	2.51809
	7.81875	14.4419	2.70825	29.5352	14.4521	10.6945	4.02297	23.848	11.6439	14.4419	2.70825
	7.83542	13.819	2.44052	28.0225	13.4058	10.5723	3.66814	24.6445	11.6055	13.819	2.44052
	7.85208	13.8883	2.41573	29.128	14.253	10.307	3.22483	24.3614	11.2524	13.8883	2.41573
	7.86875	14.6649	2.69533	28.0457	13.6504	10.8918	3.69457	24.4691	10.6688	14.6649	2.69533
	7.88542	14.4782	2.89707	27.659	13.7654	10.4733	3.8899	24.7719	11.1177	14.4782	2.89707
	7.90208	14.4044	2.44142	28.5929	14.2926	10.1004	3.10233	23.8562	10.9905	14.4044	2.44142
	7.91875	14.0209	2.60207	27.3623	13.3875	9.77451	3.34114	23.5092	11.2514	14.0209	2.60207
	7.93542	14.5679	2.33819	28.1176	13.6986	9.85735	2.98065	23.8377	11.1787	14.5679	2.33819
	7.95208	14.4086	1.93392	27.2297	13.1402	10.2979	2.84747	23.9157	10.5226	14.4086	1.93392
	7.96875	13.5191	2.27291	27.1041	13.2263	9.38477	3.55824	23.6901	10.1334	13.5191	2.27291
	7.98542	13.9759	1.86327	27.7069	12.1583	9.7626	3.3911	23.1388	9.39155	13.9759	1.86327
	8.00208	13.8906	1.94728	27.317	12.4296	9.52765	2.50481	23.3997	10.0084	13.8906	1.94728
	8.01875	13.2856	2.21656	27.3522	12.2155	8.95604	3.16582	23.467	9.62501	13.2856	2.21656
	8.03542	13.3898	1.5937	27.3919	12.8672	9.71923	2.4112	23.6933	9.85435	13.3898	1.5937
	8.05208	13.225	2.06603	27.0521	12.0398	9.43187	2.11736	23.8053	9.79535	13.225	2.06603
	8.06875	13.3498	1.70216	27.0999	12.1944	9.37197	3.19337	22.8198	9.86536	13.3498	1.70216
	8.08542	13.598	1.78935	26.8534	11.9828	9.47878	2.55764	22.2459	8.5933	13.598	1.78935
	8.10208	14.099	2.04286	26.3199	11.9016	9.1458	2.80002	22.5287	9.59386	14.099	2.04286
	8.11875	13.0189	1.47378	27.4795	11.4729	9.03434	2.69955	22.8768	9.2409	13.0189	1.47378
	8.13542	13.1752	1.24033	25.8914	11.5965	9.04389	2.18125	22.3309	8.7759	13.1752	1.24033
	8.15208	13.1371	0.917189	25.4711	11.0069	9.15734	2.87896	22.1811	8.9586	13.1371	0.917189
	8.16875	13.4772	1.36256	25.1301	11.1408	8.85576	2.28096	22.4946	8.62174	13.4772	1.36256
	8.18542	12.8173	0.970574	26.3724	11.1253	8.59657	1.9977	22.1497	8.28668	12.8173	0.970574
	8.20208	13.203	1.34683	25.5142	11.1687	8.25672	2.43467	21.7884	8.4684	13.203	1.34683
	8.21875	13.0505	1.10678	25.5753	10.718	8.56982	1.75631	21.8313	7.89915	13.0505	1.10678
	8.23542	13.4827	1.34617	25.4175	11.1944	8.97365	1.6158	22.0306	8.39292	13.4827	1.34617
	8.25208	12.9153	1.65994	25.3128	10.557	8.91642	2.07412	22.0708	8.59538	12.9153	1.65994
	8.26875	12.4958	0.949147	24.8957	10.8782	8.54746	1.69938	21.7412	7.96294	12.4958	0.949147
	8.28542	12.4821	1.06613	25.6224	10.5024	8.52969	1.89687	21.7983	8.24061	12.4821	1.06613
	8.30208	12.3872	1.30011	24.6972	10.1983	7.97196	1.52104	21.2165	7.85369	12.3872	1.30011
	8.31875	13.1452	1.19385	24.7364	10.7766	8.19159	1.40466	21.7593	7.73625	13.1452	1.19385
	8.33542	13.0649	1.11856	24.6115	9.84474	8.30493	2.41437	21.5902	7.57973	13.0649	1.11856
	8.35208	12.9075	1.03471	25.4726	9.7937	8.10441	1.47074	21.0894	7.59953	12.9075	1.03471
	8.36875	12.8166	0.517781	24.6823	10.4073	7.59141	1.7971	20.9902	7.42316	12.8166	0.517781
	8.38542	12.7108	0.908468	23.9078	10.4883	8.29321	2.04839	21.4478	7.28395	12.7108	0.908468
	8.40208	12.2157	0.82535	24.4119	9.57631	7.87001	1.75701	20.8488	7.69563	12.2157	0.82535
	8.41875	12.6382	1.10464	24.8335	9.36832	7.61693	1.78306	21.0899	7.04251	12.6382	1.10464
	8.43542	12.2897	1.0431	24.2713	10.0171	7.82393	1.05263	21.0888	7.03808	12.2897	1.0431
	8.45208	12.1248	1.07948	23.1161	9.66685	8.26161	1.27458	20.6198	6.78603	12.1248	1.07948
	8.46875	12.766	0.904338	23.2764	9.56286	7.74609	1.18754	20.9775	7.08869	12.766	0.904338
	8.48542	12.3763	0.434488	23.8098	8.41835	7.48491	1.47797	20.6686	6.55876	12.3763	0.434488
	8.50208	11.6393	0.564988	23.1611	9.0556	7.58034	1.82117	20.9573	7.22947	11.6393	0.564988
	8.51875	11.8607	0.8381	23.1455	9.04349	7.02716	1.53852	20.6263	6.77117	11.8607	0.8381
	8.53542	11.8241	0.659039	23.1546	8.90687	7.35768	1.47799	20.2243	6.54777	11.8241	0.659039
	8.55208	11.4972	1.08854	23.7521	9.02259	7.52827	1.48547	20.0198	6.05952	11.4972	1.08854
	8.56875	12.3852	0.306593	23.2152	8.49447	7.65006	1.3668	20.2619	6.66053	12.3852	0.306593
	8.58542	11.3069	0.60283	22.0225	8.60293	7.01591	1.33541	21.0059	6.21793	11.3069	0.60283
	8.60208	11.8884	0.138785	23.9499	8.59332	7.19262	1.339	19.8367	6.05146	11.8884	0.138785
	8.61875	11.5202	0.105119	22.8394	8.87612	7.47303	0.88926	19.8888	5.65914	11.5202	0.105119
	8.63542	11.5603	0.459084	22.8662	8.54945	7.35136	1.10792	19.4173	6.47002	11.5603	0.459084
	8.65208	11.5618	0.172306	22.696	8.18045	7.07571	1.07631	20.1046	6.28321	11.5618	0.172306
	8.66875	11.7747	0.995802	22.8142	8.50692	6.95823	0.892077	20.032	6.26949	11.7747	0.995802
	8.68542	11.5258	0.423174	23.1736	8.72034	6.765	1.27951	20.0997	5.90249	11.5258	0.423174
	8.70208	11.4899	0.141923	22.6329	8.38681	6.53571	0.930745	19.9085	6.1587	11.4899	0.141923
	8.71875	11.4212	-0.110856	22.0455	7.7233	7.23194	0.962581	19.0841	5.90432	11.4212	-0.110856
	8.73542	11.262	-0.442191	21.3259	7.56095	7.57814	1.25873	19.6444	5.85906	11.262	-0.442191
	8.75208	11.1262	0.0869347	22.2967	7.54677	6.95072	0.712581	20.0813	5.76117	11.1262	0.0869347
	8.76875	11.9972	0.189542	21.6104	8.32251	6.66383	1.14235	19.7319	5.27624	11.9972	0.189542
	8.78542	11.9317	0.0765633	22.0228	7.73599	7.33029	0.895769	19.256	5.63125	11.9317	0.0765633
	8.80208	11.4705	0.622932	21.8602	8.24822	6.8203	1.05871	18.9532	5.45169	11.4705	0.622932
	8.81875	11.2285	-0.375758	21.1954	7.5698	6.99753	1.41725	19.4012	5.69569	11.2285	-0.375758
	8.83542	11.6018	-0.508	21.8854	8.12159	7.26253	0.354279	19.2815	5.03393	11.6018	-0.508
	8.85208	10.4868	-0.243213	22.2879	7.05301	6.79582	0.826414	19.7	5.6325	10.4868	-0.243213
	8.86875	11.6851	-0.0464924	22.0398	7.55752	6.69661	0.549268	19.1343	4.75752	11.6851	-0.0464924
	8.88542	11.1166	-0.21839	21.961	7.55799	7.02281	0.75236	19.3526	5.4626	11.1166	-0.21839
	8.90208	11.3727	2.8957	21.5755	7.35735	6.64742	0.181817	19.131	5.43909	11.3727	2.8957
	8.91875	11.333	8.36775	21.8331	7.13248	6.55765	0.718525	18.9913	5.41529	11.333	8.36775
	8.93542	11.2605	9.44155	21.0476	7.74147	6.66575	0.783446	19.0128	4.81484	11.2605	9.44155
	8.95208	10.6738	9.65832	21.2326	14.0889	6.28625	0.788448	19.2647	5.4518	10.6738	9.65832
	8.96875	11.4226	9.7289	21.2278	18.0557	6.67833	0.738618	19.3398	4.48724	11.4226	9.7289
	8.98542	10.8884	9.45967	21.2059	21.5484	6.41982	2.26372	18.6098	4.40514	10.8884	9.45967
	9.00208	10.9327	9.27398	20.169	23.5288	6.91439	8.47206	18.8508	4.42754	10.9327	9.27398
	9.01875	14.4685	9.70363	20.3616	24.1784	6.56219	10.0651	18.9128	5.33866	14.4685	9.70363
	9.03542	18.652	9.45305	20.5043	23.7453	7.23116	11.0026	18.851	4.89443	18.652	9.45305
	9.05208	20.7957	9.39768	21.2399	23.7609	13.1299	11.6486	23.3403	8.99075	20.7957	9.39768
	9.06875	22.437	9.71113	20.4869	23.7466	17.2786	11.8894	27.9263	17.6673	22.437	9.71113
	9.08542	21.9774	9.05016	28.8979	24.0115	17.6871	11.3801	31.2565	19.1349	21.9774	9.05016
	9.10208	22.515	8.9562	33.7485	24.1295	18.5474	11.6792	32.576	19.7983	22.515	8.9562
	9.11875	22.1524	8.66877	35.4006	23.7656	18.6824	10.9385	33.3949	19.8128	22.1524	8.66877
	9.13542	22.6412	8.75495	36.5828	23.298	18.7788	11.6899	33.796	19.7891	22.6412	8.75495
	9.15208	22.5594	8.31813	35.8444	23.3216	19.2789	10.833	33.8293	19.7507	22.5594	8.31813
	9.16875	21.9561	7.92552	37.2496	22.6674	18.4471	10.883	33.0273	18.8625	21.9561	7.92552
	9.18542	22.5034	7.94734	37.1002	21.9362	18.5702	10.6078	33.549	19.84	22.5034	7.94734
	9.20208	22.482	7.68138	36.6836	21.9096	17.6492	10.6357	33.988	18.6707	22.482	7.68138
	9.21875	22.3954	8.28724	36.7967	22.2428	18.3986	10.5862	34.0745	19.1798	22.3954	8.28724
	9.23542	21.9712	7.87094	36.4109	21.5933	18.0844	10.3901	33.5135	18.8966	21.9712	7.87094
	9.25208	21.8076	8.30704	36.6644	20.5348	17.9472	9.86163	33.3775	18.0129	21.8076	8.30704
	9.26875	22.1777	7.17092	35.8496	21.6575	17.4867	9.6424	33.0692	18.2974	22.1777	7.17092
	9.28542	21.7201	6.5121	36.6608	21.3741	17.7853	9.96815	33.0592	17.5485	21.7201	6.5121
	9.30208	21.4474	7.03496	35.4983	20.8993	17.4873	9.15448	32.298	18.3823	21.4474	7.03496
	9.31875	21.8775	6.88399	36.6566	20.7588	17.2157	8.89977	32.0283	17.3958	21.8775	6.88399
	9.33542	22.0567	6.74652	35.9436	20.994	17.4457	9.29481	33.4181	17.7162	22.0567	6.74652
	9.35208	22.0555	6.36781	35.1328	19.9991	17.0895	9.47569	32.2543	17.4652	22.0555	6.36781
	9.36875	21.0461	7.03296	36.254	20.3501	17.4224	8.39964	31.449	17.8099	21.0461	7.03296
	9.38542	21.2823	6.92316	35.9072	20.003	16.5861	8.52978	32.4905	17.0218	21.2823	6.92316
	9.40208	21.6943	6.3693	35.2562	19.3431	16.7319	8.51317	31.6083	17.6933	21.6943	6.3693
	9.41875	21.7522	6.06768	35.1784	20.2205	16.0133	8.25976	31.4677	16.3356	21.7522	6.06768
	9.43542	21.3638	5.85654	34.7716	19.4245	16.8011	8.67936	31.5388	16.72	21.3638	5.85654
	9.45208	21.329	6.32942	34.8589	18.6641	16.252	8.71231	31.6129	16.1753	21.329	6.32942
	9.46875	21.1038	5.64204	35.2194	18.8695	15.83	8.27634	31.3175	16.5689	21.1038	5.64204
	9.48542	21.2192	5.97343	34.9383	19.7738	15.2651	8.2951	30.8879	16.2122	21.2192	5.97343
	9.50208	20.6874	5.71214	34.8156	18.8263	15.7487	7.75653	30.103	15.4122	20.6874	5.71214
	9.51875	20.9215	5.1157	34.7377	18.3786	16.0514	7.88708	31.012	15.5041	20.9215	5.1157
	9.53542	20.371	6.29711	33.9332	18.1833	15.8369	7.79103	30.3708	15.671	20.371	6.29711
	9.55208	21.2789	5.40561	33.7825	17.5883	15.0445	7.14945	30.5639	14.6069	21.2789	5.40561
	9.56875	21.0501	5.76149	34.0616	18.3497	15.26	7.20006	30.6025	14.8886	21.0501	5.76149
	9.58542	20.1534	5.07982	34.6469	17.2407	15.1749	6.74111	30.3495	14.3139	20.1534	5.07982
	9.60208	20.7709	4.598	34.1339	17.9658	15.0365	7.42418	30.0069	14.7497	20.7709	4.598
	9.61875	20.8254	4.75526	33.8749	17.3588	14.7899	6.95714	29.799	14.1581	20.8254	4.75526
	9.63542	21.0936	4.99881	34.6054	17.4436	14.9454	6.64567	29.8697	14.1748	21.0936	4.99881
	9.65208	21.6337	4.72893	34.1007	17.2379	15.3502	7.16956	29.3374	14.5115	21.6337	4.72893
	9.66875	20.6489	4.87387	33.8027	16.8	14.4488	6.76956	29.7229	13.927	20.6489	4.87387
	9.68542	20.6955	4.3791	34.3726	16.1349	14.198	6.83332	29.9627	14.0892	20.6955	4.3791
	9.70208	20.4413	3.73453	33.7092	16.3372	14.1878	6.67477	29.2983	13.8785	20.4413	3.73453
	9.71875	20.9117	4.35892	33.0375	16.6444	15.0655	6.21055	29.3574	13.7511	20.9117	4.35892
	9.73542	20.866	4.69447	33.8853	16.5991	14.6755	6.19007	28.6643	13.3242	20.866	4.69447
	9.75208	21.0659	4.10686	32.8847	15.4693	13.7911	6.84692	29.4363	13.392	21.0659	4.10686
	9.76875	20.0269	4.88375	32.9834	15.8633	14.0548	6.3376	28.5715	13.5963	20.0269	4.88375
	9.78542	20.0989	4.2617	33.0636	15.6105	13.6288	5.74543	28.8908	13.0986	20.0989	4.2617
	9.80208	20.7626	4.0468	32.373	15.5218	13.859	5.842	29.3714	12.9206	20.7626	4.0468
	9.81875	20.7798	4.18066	33.1202	15.6334	13.7555	6.1725	28.6026	12.165	20.7798	4.18066
	9.83542	19.9978	3.66508	32.5718	15.9521	13.9253	5.92493	28.8179	13.045	19.9978	3.66508
	9.85208	19.9311	3.95782	32.8292	15.2567	13.943	5.06488	28.7846	13.2909	19.9311	3.95782
	9.86875	20.9604	3.78173	32.0284	15.3211	13.6859	5.6771	28.5424	11.691	20.9604	3.78173
	9.88542	20.0036	4.09715	32.6777	14.4623	13.3842	5.21213	29.1282	12.0058	20.0036	4.09715
	9.90208	20.8009	3.96622	33.2371	14.7498	13.4391	5.4157	27.7145	12.0104	20.8009	3.96622
	9.91875	20.6982	3.88522	32.3269	14.4545	13.8012	5.05054	28.4807	12.243	20.6982	3.88522
	9.93542	19.7692	3.81903	31.9043	13.3843	13.1976	5.29904	28.1781	12.6814	19.7692	3.81903
	9.95208	20.3823	4.1724	31.7989	14.0832	13.2063	4.54408	28.5274	11.4369	20.3823	4.1724
	9.96875	20.0381	3.68233	32.5342	13.0558	13.3772	5.18208	27.761	11.4031	20.0381	3.68233
	9.98542	19.4704	3.11499	32.2957	13.8428	12.8891	5.00425	27.8192	11.2018	19.4704	3.11499
	10.0021	20.3354	3.62911	32.0695	13.9779	13.0522	4.95489	28.5633	11.3533	20.3354	3.62911
	10.0188	20.0333	3.80553	31.44	13.8539	12.9399	4.82876	28.1371	11.0073	20.0333	3.80553
	10.0354	19.6263	2.64938	32.0797	12.5778	12.4821	4.71486	28.6864	11.2106	19.6263	2.64938
	10.0521	19.983	2.67336	31.5191	13.3125	13.3605	4.85852	27.082	11.0257	19.983	2.67336
	10.0688	20.1442	3.57596	31.8658	12.9835	12.4425	4.37506	27.1502	11.3085	20.1442	3.57596
	10.0854	19.8788	3.14726	30.8476	13.235	12.827	4.41195	27.9246	10.5165	19.8788	3.14726
	10.1021	19.4257	2.88345	30.8608	13.163	12.4242	4.68698	28.668	10.4754	19.4257	2.88345
	10.1187	20.2262	2.59509	31.4851	12.7534	12.2626	4.11333	27.078	10.4525	20.2262	2.59509
	10.1354	19.5609	3.1801	31.0991	12.8861	12.8615	4.42263	27.5382	10.7045	19.5609	3.1801
	10.1521	19.6123	3.27841	30.5347	12.7622	12.5503	4.34803	27.8986	11.2482	19.6123	3.27841
	10.1687	20.4406	3.24091	31.1136	12.2693	12.3653	4.01544	27.1832	10.0436	20.4406	3.24091
	10.1854	20.344	2.61606	30.7821	12.7295	11.9149	3.96235	26.9263	10.1849	20.344	2.61606
	10.2021	20.1273	2.62051	30.9251	12.2912	11.9846	4.33574	27.4887	9.6113	20.1273	2.62051
	10.2188	20.0178	2.89087	30.2977	11.6835	11.8762	3.91837	26.9832	9.45494	20.0178	2.89087
	10.2354	20.7878	3.15143	29.9463	11.8941	12.115	3.84294	27.1566	10.073	20.7878	3.15143
	10.2521	20.1427	2.56329	30.1674	12.2369	11.7835	3.30035	27.2448	10.1502	20.1427	2.56329
	10.2688	19.9272	2.2756	30.2207	12.2579	12.2562	4.22774	26.6879	9.71282	19.9272	2.2756
	10.2854	20.2457	2.7894	30.2306	12.2667	11.7693	3.64371	27.7421	9.86911	20.2457	2.7894
	10.3021	19.7694	2.6242	29.474	11.5856	11.4849	3.4195	27.1853	9.4802	19.7694	2.6242
	10.3188	19.4433	2.78392	29.3234	11.6315	12.2969	3.48826	26.8324	9.64998	19.4433	2.78392
	10.3354	19.6093	2.62371	30.2727	11.169	11.8589	3.44702	27.5602	8.9214	19.6093	2.62371
	10.3521	20.0068	2.27495	30.141	11.2736	12.018	3.45305	26.3176	9.07121	20.0068	2.27495
	10.3687	19.7892	2.53112	29.4654	11.1665	12.0623	3.50902	26.772	9.5919	19.7892	2.53112
	10.3854	19.814	2.43531	29.7819	11.4191	11.3793	3.46491	27.0396	8.93211	19.814	2.43531
	10.4021	19.5484	2.18203	29.9913	11.2794	11.0919	3.03957	26.4775	7.94059	19.5484	2.18203
	10.4187	19.9519	2.91315	29.3577	11.3936	11.7781	3.0549	26.9741	9.6348	19.9519	2.91315
	10.4354	19.8132	2.35062	30.3185	11.0561	11.3482	3.58269	26.7338	8.29434	19.8132	2.35062
	10.4521	20.231	1.89968	29.9282	11.4081	11.8315	3.44104	27.35	9.04259	20.231	1.89968
	10.4688	19.765	1.81555	28.6926	10.7729	10.7802	3.52698	26.4982	8.88382	19.765	1.81555
	10.4854	19.9112	1.50333	28.6717	11.4796	11.4473	3.0917	25.8578	8.68147	19.9112	1.50333
	10.5021	20.0141	1.6964	29.3283	10.659	11.1199	3.30805	25.6171	8.95964	20.0141	1.6964
	10.5188	20.385	2.06579	29.6221	10.6079	10.988	3.52275	26.5406	9.48424	20.385	2.06579
	10.5354	20.0061	1.77279	29.1832	9.77374	11.498	3.61211	26.3296	8.80659	20.0061	1.77279
	10.5521	19.6686	1.64228	29.0277	10.9044	11.5112	2.97988	26.6732	8.22537	19.6686	1.64228
	10.5688	19.6372	1.66912	28.4433	11.0159	11.2468	2.34513	26.1926	8.60027	19.6372	1.66912
	10.5854	19.9402	1.53774	29.4318	10.5972	10.4289	2.97383	26.5471	8.36301	19.9402	1.53774
	10.6021	19.9012	2.00464	29.62	10.5469	11.1128	3.13565	25.9514	8.5195	19.9012	2.00464
	10.6187	19.9435	1.57315	28.9687	10.4982	11.2578	2.63099	26.2074	8.29458	19.9435	1.57315
	10.6354	20.0221	1.70943	29.2841	10.2554	11.1801	2.61793	26.4384	8.15215	20.0221	1.70943
	10.6521	19.9882	1.92153	28.0755	10.5395	11.1364	2.78349	25.6037	7.86957	19.9882	1.92153
	10.6687	19.7741	1.98488	27.9161	10.1987	10.7378	2.98275	26.3441	7.39335	19.7741	1.98488
	10.6854	20.0592	2.31788	28.1035	9.62957	10.6877	2.20127	25.7907	8.04281	20.0592	2.31788
	10.7021	19.6487	0.775491	28.7177	10.0594	10.6864	2.22317	26.7404	7.48757	19.6487	0.775491
	10.7188	19.8945	1.81039	28.0415	9.85692	10.5289	2.53475	26.2387	7.96368	19.8945	1.81039
	10.7354	19.5578	1.67542	29.2323	10.3925	10.6804	2.71924	26.2099	8.08997	19.5578	1.67542
	10.7521	19.5569	1.6927	28.8668	9.98551	10.7101	2.83451	25.9747	8.09958	19.5569	1.6927
	10.7688	19.6201	1.15931	39.7423	9.61349	10.7503	2.64269	25.9091	8.02196	19.6201	1.15931
	10.7854	20.0492	1.6788	42.9503	9.47378	10.7382	2.53867	25.4072	7.31494	20.0492	1.6788
	10.8021	19.4389	1.31514	43.5596	9.31258	10.0128	2.56524	25.7277	7.63115	19.4389	1.31514
	10.8188	19.9441	1.05883	43.2355	9.16554	10.2005	2.4067	25.9706	7.34371	19.9441	1.05883
	10.8354	19.7023	1.47514	44.3869	9.42767	10.442	2.3711	26.0508	7.50623	19.7023	1.47514
	10.8521	19.6061	1.39688	45.0023	9.72499	10.2589	2.20596	25.878	6.89656	19.6061	1.39688
	10.8687	20.3257	1.62269	44.4338	9.89264	10.59	2.17376	25.5101	7.90122	20.3257	1.62269
	10.8854	19.6813	1.30186	43.7304	9.59087	10.4414	2.85525	25.9355	7.83758	19.6813	1.30186
	10.9021	19.7506	1.51971	44.5302	9.72138	10.3678	2.6612	25.8158	7.10241	19.7506	1.51971
	10.9187	19.9866	1.43839	43.943	9.16131	10.2117	2.34993	31.4447	7.26356	19.9866	1.43839
	10.9354	19.5666	1.34631	43.9219	10.0163	9.79839	2.07851	38.5241	7.13766	19.5666	1.34631
	10.9521	20.2586	1.46591	43.908	9.83179	10.4075	2.39628	39.2286	7.26117	20.2586	1.46591
	10.9688	19.6003	1.57364	45.0796	11.8828	10.3988	2.48772	40.8276	6.87148	19.6003	1.57364
	10.9854	19.4077	1.40659	43.5458	18.7446	17.527	7.55305	39.9386	7.1435	19.4077	1.40659
	11.0021	20.0855	1.14287	43.8008	22.3091	19.6333	10.5008	41.1716	7.9073	20.0855	1.14287
	11.0188	19.9435	1.74266	43.1053	24.7638	21.0121	11.2577	41.1092	12.5675	19.9435	1.74266
	11.0354	19.7033	1.68767	43.4139	25.801	21.3542	12.3265	40.7918	16.6838	19.7033	1.68767
	11.0521	19.737	0.80779	43.3711	25.8553	20.986	12.8426	41.1519	19.4438	19.737	0.80779
	11.0688	19.9246	1.07681	42.674	26.3919	20.1323	13.1177	40.5871	21.2787	19.9246	1.07681
	11.0854	19.9775	1.22232	43.9282	26.8624	20.9415	12.9654	40.4753	20.696	19.9775	1.22232
	11.1021	19.4776	1.0448	43.2502	25.5498	21.7592	12.8422	39.7798	21.0674	19.4776	1.0448
	11.1187	19.8207	1.86913	42.7514	26.292	21.4439	12.7607	39.9558	21.0789	19.8207	1.86913
	11.1354	19.7285	7.38826	43.4999	26.4252	20.3216	12.3308	40.0005	20.9929	19.7285	7.38826
	11.1521	25.0741	8.60672	43.2737	26.1073	20.523	11.6747	40.069	20.2613	25.0741	8.60672
	11.1687	26.8648	10.1364	42.9885	25.0832	20.2345	12.348	39.3952	20.9653	26.8648	10.1364
	11.1854	27.5183	9.94466	42.6947	24.771	20.2881	11.8645	40.3634	20.8095	27.5183	9.94466
	11.2021	28.9927	10.1625	42.8717	24.707	20.2948	12.0102	39.4413	20.033	28.9927	10.1625
	11.2188	29.3823	10.6487	41.4346	24.5614	20.4744	11.676	39.4629	19.8521	29.3823	10.6487
	11.2354	28.6941	10.7932	43.0281	24.9006	19.7818	11.3915	39.8649	20.0566	28.6941	10.7932
	11.2521	29.5219	10.6462	41.8449	24.62	20.3773	10.8768	39.5933	20.1182	29.5219	10.6462
	11.2688	29.7499	11.1047	42.4493	24.3319	20.3342	11.1689	38.5412	20.178	29.7499	11.1047
	11.2854	29.8939	10.4228	42.2081	24.5322	20.6375	11.0419	38.5797	19.5857	29.8939	10.4228
	11.3021	29.5975	10.6303	42.2759	23.6371	19.9079	10.3197	39.4551	19.4865	29.5975	10.6303
	11.3188	29.6925	10.5195	42.7173	24.1434	19.7268	10.6128	38.6701	19.6542	29.6925	10.5195
	11.3354	29.3763	10.0812	42.3292	23.6597	20.1155	10.7205	39.4237	19.0174	29.3763	10.0812
	11.3521	29.4498	9.88805	41.9579	22.8314	19.5859	10.5726	38.8015	18.5971	29.4498	9.88805
	11.3687	29.3836	10.1169	42.7708	22.5439	19.7047	11.0198	38.7651	19.6789	29.3836	10.1169
	11.3854	29.7732	9.92634	41.7855	23.6369	19.1754	9.92608	38.6865	19.2014	29.7732	9.92634
	11.4021	29.6467	9.67959	42.0135	22.8906	19.6882	10.1587	38.7361	18.872	29.6467	9.67959
	11.4187	30.0207	9.83591	42.0167	22.4705	19.23	9.8938	38.9558	18.6932	30.0207	9.83591
	11.4354	29.3428	9.76804	42.2749	22.4434	19.5686	10.2006	39.1601	18.8441	29.3428	9.76804
	11.4521	30.2587	9.7002	42.1522	22.057	19.4618	9.99713	38.8641	17.9455	30.2587	9.7002
	11.4688	30.0182	9.20159	42.7813	21.8306	19.0745	9.6573	38.8954	18.019	30.0182	9.20159
	11.4854	30.9394	10.0454	41.354	21.1901	18.8549	9.3857	39.0792	18.4679	30.9394	10.0454
	11.5021	29.8758	8.70734	41.8292	21.403	18.9932	9.35734	38.8945	17.8881	29.8758	8.70734
	11.5188	29.9457	8.99996	41.7285	21.3777	18.8432	9.12383	38.6109	18.1655	29.9457	8.99996
	11.5354	29.4033	9.35193	41.5618	21.2951	18.5111	8.78518	37.9488	17.7447	29.4033	9.35193
	11.5521	30.1744	8.55075	41.2951	21.1708	19.0491	9.4253	38.1824	17.529	30.1744	8.55075
	11.5688	28.8079	9.24059	41.7152	20.4412	19.2067	9.02362	38.6181	17.2545	28.8079	9.24059
	11.5854	29.7838	8.89054	41.8872	21.0206	18.4949	8.89672	38.008	17.0746	29.7838	8.89054
	11.6021	29.8124	8.8081	42.3901	20.6617	19.2414	8.92817	38.5108	16.9797	29.8124	8.8081
	11.6187	29.4418	8.41652	41.8284	20.887	18.4804	8.97281	38.0468	17.4509	29.4418	8.41652
	11.6354	29.9634	8.62152	41.5028	20.0648	18.1801	8.57085	37.9326	15.5736	29.9634	8.62152
	11.6521	29.5376	8.31491	42.0832	20.4713	18.6392	8.68424	38.4525	16.4824	29.5376	8.31491
	11.6687	29.4393	8.10568	41.1691	20.2645	18.2596	8.83424	38.5996	16.4778	29.4393	8.10568
	11.6854	29.5811	8.16124	41.5555	20.5405	17.9355	8.96068	38.8226	16.8716	29.5811	8.16124
	11.7021	29.9492	7.89767	41.2173	20.3147	18.4615	8.53264	38.3246	16.3325	29.9492	7.89767
	11.7188	29.2257	8.22182	41.3529	20.2458	17.5242	8.52897	37.3789	16.7426	29.2257	8.22182
	11.7354	29.8293	7.68997	42.3375	19.1029	18.2578	7.74281	38.4918	15.6756	29.8293	7.68997
	11.7521	30.4144	7.71352	41.962	19.101	18.1139	7.65905	38.2275	15.7893	30.4144	7.71352
	11.7688	30.671	7.93215	41.1678	19.2287	17.7626	8.05821	37.8076	15.7517	30.671	7.93215
	11.7854	30.0393	7.80841	42.0555	19.2553	17.8575	8.26715	37.9953	15.6331	30.0393	7.80841
	11.8021	30.6493	7.09545	42.1956	19.6436	17.7081	8.02762	38.2618	15.2056	30.6493	7.09545
	11.8188	30.201	7.25772	41.9678	18.7667	18.3308	7.9771	37.8672	15.3768	30.201	7.25772
	11.8354	30.1844	7.43338	41.4492	18.9464	17.7486	7.90528	39.2298	15.1738	30.1844	7.43338
	11.8521	30.8525	7.19214	41.1504	18.3386	17.7908	7.42178	38.7387	15.2058	30.8525	7.19214
	11.8687	30.0989	7.53869	41.9937	17.8895	17.5551	7.78681	38.6624	15.167	30.0989	7.53869
	11.8854	30.8914	7.21571	41.3075	18.6664	17.3508	7.53054	38.7728	15.2426	30.8914	7.21571
	11.9021	29.5437	7.51422	40.6305	18.1466	17.7454	8.06676	37.7309	15.2206	29.5437	7.51422
	11.9187	30.5632	6.59366	41.4307	17.556	17.5548	7.09133	38.3723	14.5645	30.5632	6.59366
	11.9354	30.5855	6.60206	40.8819	17.4843	17.4806	7.44124	38.86	14.3798	30.5855	6.60206
	11.9521	30.0494	6.70609	41.0528	17.6798	17.2066	7.50938	38.7196	14.4274	30.0494	6.70609
	11.9688	30.5777	6.95132	41.8684	17.7345	16.8454	7.4221	38.1639	14.4152	30.5777	6.95132
	11.9854	30.1126	6.9467	40.1101	17.8605	16.7594	7.0541	38.6546	15.0324	30.1126	6.9467
	12.0021	31.2344	6.46546	40.6307	17.6606	17.4312	7.31196	38.7763	14.919	31.2344	6.46546
	12.0188	30.8254	6.20504	40.6486	16.5923	17.1119	7.12941	38.7261	13.7748	30.8254	6.20504
	12.0354	30.5643	6.93089	41.0609	16.7135	17.2583	7.16149	38.6855	14.3697	30.5643	6.93089
	12.0521	31.0192	6.34515	40.9398	16.2619	16.8278	7.2036	38.7538	13.3597	31.0192	6.34515
	12.0688	30.5756	6.45152	40.9105	17.0218	17.3625	7.11614	38.0173	13.6106	30.5756	6.45152
	12.0854	30.3328	6.9247	40.6088	16.7461	17.2051	7.43811	39.0611	14.6405	30.3328	6.9247
	12.1021	31.6542	6.09829	40.636	17.6776	16.9099	6.70242	38.7456	13.8368	31.6542	6.09829
	12.1187	30.9242	6.56129	40.9316	17.154	17.5344	7.55287	38.7207	13.623	30.9242	6.56129
	12.1354	31.5512	6.537	41.5809	16.3888	16.9745	7.34586	39.3206	13.6535	31.5512	6.537
	12.1521	30.4023	6.15769	41.1806	16.114	17.573	6.81158	38.2998	13.9736	30.4023	6.15769
	12.1687	30.9536	6.50102	41.7662	16.3153	17.1003	6.91943	38.4514	13.8955	30.9536	6.50102
	12.1854	31.7792	5.91545	39.8571	16.9731	16.4673	6.43878	39.3396	13.0615	31.7792	5.91545
	12.2021	31.4963	6.472	41.0805	16.6414	16.8084	7.10749	39.2478	13.2175	31.4963	6.472
	12.2188	30.3581	5.53234	41.0454	16.1012	16.8745	6.30176	38.9083	13.0727	30.3581	5.53234
	12.2354	31.0953	5.84457	40.482	15.9159	17.1272	6.47317	39.1657	13.4068	31.0953	5.84457
	12.2521	32.0895	5.83204	40.5715	16.1654	16.5393	6.5947	38.4402	13.0907	32.0895	5.83204
	12.2688	31.4169	5.79914	41.1833	15.8044	17.5595	6.54733	38.7553	13.056	31.4169	5.79914
	12.2854	32.0797	6.20953	41.1964	15.6306	16.6116	6.47089	39.5744	12.8348	32.0797	6.20953
	12.3021	31.0767	5.77396	40.5523	15.8354	16.9638	6.26978	39.8822	12.7747	31.0767	5.77396
	12.3188	32.3285	5.98548	40.689	15.1675	16.5284	6.19081	39.2976	12.3593	32.3285	5.98548
	12.3354	31.6621	6.18759	41.1856	15.6569	16.4173	5.77316	39.2662	12.7597	31.6621	6.18759
	12.3521	31.3142	5.80617	41.1954	15.7268	16.2957	6.14655	39.096	13.5654	31.3142	5.80617
	12.3687	31.8756	5.55776	40.4761	15.8772	16.6066	6.53474	39.4095	13.4752	31.8756	5.55776
	12.3854	31.1181	5.95069	39.9756	15.2168	16.7342	6.08502	39.4672	12.6068	31.1181	5.95069
	12.4021	32.6803	5.07598	40.9371	15.042	17.1142	6.52053	39.4032	12.9597	32.6803	5.07598
	12.4187	31.8425	5.50181	41.2904	15.7267	17.0352	6.01118	39.0677	12.2878	31.8425	5.50181
	12.4354	31.5915	5.69496	41.0421	14.4491	16.4167	5.62592	39.8819	12.3631	31.5915	5.69496
	12.4521	32.2123	5.58466	40.6583	14.812	17.01	5.79336	39.1097	11.9917	32.2123	5.58466
	12.4688	32.6794	5.78903	40.9596	15.8486	16.4311	5.37302	39.5267	12.2529	32.6794	5.78903
	12.4854	31.8007	5.33037	40.0183	14.8805	16.1304	5.83551	40.4103	12.7047	31.8007	5.33037
	12.5021	32.5719	5.35564	39.4804	14.5937	16.6973	5.55547	39.831	12.2799	32.5719	5.35564
	12.5188	32.1234	5.71125	40.7508	14.1313	16.3007	5.6524	39.4776	12.5867	32.1234	5.71125
	12.5354	32.6936	5.51635	40.9391	14.7354	16.3451	5.43127	40.0552	12.7009	32.6936	5.51635
	12.5521	33.0255	5.8372	40.7535	14.2422	16.8411	5.62664	39.6701	11.9837	33.0255	5.8372
	12.5688	31.8062	5.61067	40.5437	15.0933	16.4568	5.54753	38.9187	11.5748	31.8062	5.61067
	12.5854	32.8408	4.90267	40.5318	14.2555	16.0479	5.28129	40.5839	11.9694	32.8408	4.90267
	12.6021	32.1427	5.32975	40.4956	14.7469	16.1919	5.65562	39.3276	11.7806	32.1427	5.32975
	12.6187	32.3426	5.35614	40.4793	14.6438	16.2898	5.39118	39.6843	11.544	32.3426	5.35614
	12.6354	32.998	5.67589	40.3887	14.4718	16.4581	4.8959	39.495	12.1267	32.998	5.67589
	12.6521	33.7685	5.19615	39.7778	14.9207	16.1592	5.62539	39.656	11.3857	33.7685	5.19615
	12.6687	33.1445	5.05272	40.805	13.1482	16.6465	5.44757	39.694	11.7453	33.1445	5.05272
	12.6854	32.5862	5.48383	40.3551	14.3729	16.4287	5.28067	39.4076	12.0265	32.5862	5.48383
	12.7021	32.8185	4.7418	39.6919	14.192	15.9871	4.95656	40.0598	11.4191	32.8185	4.7418
	12.7188	33.1342	4.71872	40.521	14.1899	16.4769	5.60024	40.209	11.8296	33.1342	4.71872
	12.7354	33.4859	4.78441	41.1435	13.8249	16.3646	5.5185	40.4281	11.7829	33.4859	4.78441
	12.7521	34.1731	4.45163	40.0142	13.7936	16.2169	5.12668	40.6939	11.5652	34.1731	4.45163
	12.7688	32.8592	5.67611	41.1438	13.5943	16.2666	5.16838	40.0646	11.7357	32.8592	5.67611
	12.7854	33.7982	4.77365	40.4471	13.2427	16.0263	5.41627	39.7116	11.6316	33.7982	4.77365
	12.8021	33.7691	5.22444	40.4613	13.9411	16.0562	5.34501	39.1048	11.0326	33.7691	5.22444
	12.8188	33.6054	4.50356	39.5942	13.5469	16.5922	5.03901	39.9409	11.3931	33.6054	4.50356
	12.8354	33.5937	4.52582	40.6638	13.9988	16.0164	5.48764	40.5828	11.0111	33.5937	4.52582
	12.8521	33.6907	4.80134	40.0189	14.0625	16.5185	5.14242	40.7655	11.307	33.6907	4.80134
	12.8687	33.3644	5.33625	40.9971	13.5896	15.8344	4.99634	40.4186	10.9081	33.3644	5.33625
	12.8854	34.1727	4.87982	40.2553	13.9287	15.8475	4.82074	40.7829	11.0237	34.1727	4.87982
	12.9021	33.7663	5.01961	39.5585	13.5684	16.4446	5.15747	40.767	10.9094	33.7663	5.01961
	12.9187	33.7277	4.49087	40.0733	13.0591	16.2391	4.93611	40.5146	10.2659	33.7277	4.49087
	12.9354	33.2164	5.01803	40.6383	13.1431	16.1569	5.02374	40.1503	10.5748	33.2164	5.01803
	12.9521	34.2244	4.79677	41.2745	12.5092	15.531	4.91251	41.1269	11.5229	34.2244	4.79677
	12.9688	33.9715	5.22199	39.9547	18.5572	18.6894	5.41784	40.8183	15.3153	33.9715	5.22199
	12.9854	34.78	8.8492	46.6527	25.3847	22.5238	10.8542	41.0428	21.2367	34.78	8.8492
	13.0021	34.3955	10.92	50.1487	27.2134	23.2594	13.2135	41.0209	24.1586	34.3955	10.92
	13.0188	34.1698	10.8007	52.4994	27.7786	23.2191	13.6523	40.4103	25.8506	34.1698	10.8007
	13.0354	34.5599	11.84	52.5408	28.5846	24.0396	13.8963	47.5025	25.3091	34.5599	11.84
	13.0521	34.8587	11.9934	53.2922	28.9119	23.613	13.7434	52.0677	26.7867	34.8587	11.9934
	13.0688	34.7081	11.9409	52.7839	29.5664	23.8098	13.7438	53.2775	26.9031	34.7081	11.9409
	13.0854	34.6984	12.4056	53.5975	29.1259	24.6261	13.1939	54.0675	27.1776	34.6984	12.4056
	13.1021	34.9621	12.1316	52.9961	29.1575	24.0525	14.111	55.0737	26.4233	34.9621	12.1316
	13.1187	34.6035	12.7113	54.2542	29.1599	24.1767	14.3806	55.4843	26.4747	34.6035	12.7113
	13.1354	35.4819	12.6002	53.4889	28.1508	23.8277	13.9256	55.3773	25.6386	35.4819	12.6002
	13.1521	34.7425	12.3608	52.8652	28.3839	23.6789	13.6897	55.9762	25.1493	34.7425	12.3608
	13.1687	35.0871	12.89	52.9568	27.7442	23.825	14.1767	54.8284	25.9392	35.0871	12.89
	13.1854	35.8731	12.2639	53.7048	27.8641	23.7335	13.6907	55.2301	25.1353	35.8731	12.2639
	13.2021	34.9858	12.7513	54.2138	28.6952	24.084	13.5658	55.7806	25.2155	34.9858	12.7513
	13.2188	34.7925	11.8707	54.2922	28.6278	23.4448	13.6735	55.6727	26.5474	34.7925	11.8707
	13.2354	36.315	12.453	53.4816	27.2852	23.2548	13.5648	55.7588	24.8994	36.315	12.453
	13.2521	35.2733	12.1546	54.7545	27.3881	23.8026	13.0662	55.5645	25.3955	35.2733	12.1546
	13.2688	35.3882	12.4668	53.0822	27.7213	23.111	13.4318	56.6828	25.2653	35.3882	12.4668
	13.2854	35.2181	12.7727	53.92	26.7295	23.4679	12.7884	55.8918	25.0158	35.2181	12.7727
	13.3021	34.9028	12.0626	54.6046	27.5145	23.6676	12.7866	55.4906	24.3354	34.9028	12.0626
	13.3188	36.1574	11.1886	54.4558	26.8003	24.1573	12.7478	54.8812	24.5961	36.1574	11.1886
	13.3354	35.6239	11.6868	53.5607	26.5338	24.1176	12.5932	55.8743	23.8699	35.6239	11.6868
	13.3521	35.4978	11.3331	54.3529	26.555	23.6204	12.917	55.8156	23.7729	35.4978	11.3331
	13.3687	35.9386	11.9408	54.4892	26.9548	23.8354	12.35	56.9673	23.9976	35.9386	11.9408
	13.3854	36.8905	11.2372	53.6725	26.6668	23.0897	12.202	55.8622	23.5886	36.8905	11.2372
	13.4021	35.9667	10.8822	53.6126	26.8406	23.3945	12.5412	55.6393	24.0782	35.9667	10.8822
	13.4187	36.2029	11.3769	54.2179	26.2117	22.7558	12.0042	56.6385	23.4145	36.2029	11.3769
	13.4354	37.2972	11.5024	54.5495	25.4919	24.0612	12.5748	55.6851	24.048	37.2972	11.5024
	13.4521	37.028	11.3191	54.4306	26.2145	23.3997	12.1499	56.5522	23.453	37.028	11.3191
	13.4688	37.1108	10.8144	54.7125	25.8739	23.6731	11.8769	56.4143	23.4624	37.1108	10.8144
	13.4854	37.1371	10.7557	54.2139	26.6135	23.7422	12.1074	56.6752	23.8802	37.1371	10.7557
	13.5021	36.7593	11.4057	54.3981	26.2024	23.6557	11.6792	56.4335	22.6776	36.7593	11.4057
	13.5188	37.1656	10.6018	54.9604	24.4808	22.9914	11.5728	57.7205	23.1246	37.1656	10.6018
	13.5354	36.9738	11.0884	55.3841	24.4599	23.485	11.3542	57.1603	23.4603	36.9738	11.0884
	13.5521	36.9485	10.2572	54.4317	25.0414	23.2827	12.2147	57.1349	23.2537	36.9485	10.2572
	13.5688	36.8087	10.755	54.9977	24.6587	22.9424	11.9233	57.1876	22.7145	36.8087	10.755
	13.5854	36.8998	10.6554	55.104	25.0746	23.6387	11.5895	56.6792	22.8019	36.8998	10.6554
	13.6021	36.5108	10.5842	55.3404	25.3876	23.1316	11.8663	57.5944	22.1603	36.5108	10.5842
	13.6187	37.22	10.5754	55.1521	24.4342	23.4846	10.6983	58.05	22.824	37.22	10.5754
	13.6354	36.9775	10.8131	54.9673	24.9097	23.0316	11.9672	56.7802	22.1369	36.9775	10.8131
	13.6521	37.3757	10.2841	55.1363	24.5514	23.7767	11.1564	57.3059	21.9667	37.3757	10.2841
	13.6687	37.6167	9.90101	55.3443	24.8086	22.7404	11.1016	56.9643	21.9571	37.6167	9.90101
	13.6854	37.2527	10.4354	55.4672	24.6353	23.3724	10.5891	57.8091	22.2001	37.2527	10.4354
	13.7021	37.1843	10.2166	56.032	24.4316	23.6816	10.8737	57.6872	21.9862	37.1843	10.2166
	13.7188	37.2001	10.7146	55.9575	24.3166	23.1176	11.2323	58.0257	22.2776	37.2001	10.7146
	13.7354	37.6131	10.6682	55.7795	24.5012	23.0577	11.1167	57.1804	21.4559	37.6131	10.6682
	13.7521	37.69	10.389	55.9359	23.9981	23.011	11.1614	57.7152	21.8133	37.69	10.389
	13.7688	37.6362	10.0696	55.6853	23.78	23.3957	11.5076	58.8386	22.1603	37.6362	10.0696
	13.7854	37.4248	9.94636	55.7104	24.2015	23.1212	10.9201	58.8766	22.0426	37.4248	9.94636
	13.8021	38.3166	10.04	56.3459	23.2643	23.6043	10.7686	58.7119	21.3383	38.3166	10.04
	13.8188	38.0025	10.0003	55.9169	23.3178	23.0641	10.8852	59.6682	21.5053	38.0025	10.0003
	13.8354	38.2026	10.1959	56.0463	23.1799	23.4113	11.1772	58.2474	20.897	38.2026	10.1959
	13.8521	37.5831	10.0906	55.6567	23.0431	24.2614	11.7008	58.9569	21.5942	37.5831	10.0906
	13.8687	38.2906	9.85752	57.1942	22.4068	23.2036	10.6415	59.0872	21.3901	38.2906	9.85752
	13.8854	38.3893	9.51397	55.9134	23.0655	23.5481	10.4303	58.1441	21.2495	38.3893	9.51397
	13.9021	38.8584	9.43989	57.7137	23.0984	23.5101	10.1957	59.3132	20.9786	38.8584	9.43989
	13.9187	38.7519	9.88425	56.6101	22.9748	24.1369	10.7659	59.3335	21.2597	38.7519	9.88425
	13.9354	39.2154	9.91478	57.2846	22.4137	23.3559	10.0162	59.7117	20.4747	39.2154	9.91478
	13.9521	38.8179	10.2347	57.5825	23.1866	23.6594	10.6058	59.7024	21.041	38.8179	10.2347
	13.9688	39.9724	10.043	56.3576	22.4831	23.5351	10.3343	59.8358	20.7604	39.9724	10.043
	13.9854	38.1249	9.36637	57.4569	23.2203	23.354	10.4476	60.8062	20.9572	38.1249	9.36637
	14.0021	39.0057	9.98818	56.6262	22.418	23.6214	10.3029	60.3246	20.7049	39.0057	9.98818
	14.0188	39.1192	9.77156	57.4136	22.5849	24.0397	10.1466	60.3045	20.3696	39.1192	9.77156
	14.0354	39.5028	8.80024	56.4724	22.1697	23.2704	10.3271	60.4714	20.664	39.5028	8.80024
	14.0521	39.3795	9.33615	57.1263	22.5958	23.8646	10.449	60.63	20.4271	39.3795	9.33615
	14.0688	38.7566	9.21148	58.3633	22.1288	23.4606	10.4267	61.4494	19.3047	38.7566	9.21148
	14.0854	37.9938	9.42575	58.7139	22.4781	24.45	9.97325	61.4224	20.0915	37.9938	9.42575
	14.1021	40.0731	10.0126	58.0474	22.4816	24.8659	10.5689	61.1546	20.623	40.0731	10.0126
	14.1187	39.3701	9.68468	56.5898	21.9317	23.7923	10.5529	61.0527	20.0018	39.3701	9.68468
	14.1354	39.6386	9.82752	58.5749	21.0358	24.3151	10.4041	61.2858	20.3596	39.6386	9.82752
	14.1521	39.2598	9.36325	58.0057	21.9931	23.9836	10.1627	61.1832	20.7972	39.2598	9.36325
	14.1687	39.1521	9.10006	58.41	22.0163	23.9573	10.0525	61.2689	20.3561	39.1521	9.10006
	14.1854	40.0725	10.0125	58.4763	21.6341	23.9249	10.2484	60.8587	20.9466	40.0725	10.0125
	14.2021	40.1523	9.9517	59.6193	22.0735	24.175	10.1301	61.8799	20.0602	40.1523	9.9517
	14.2188	40.3694	9.75296	58.8562	21.5013	24.2482	10.8696	62.9123	19.6599	40.3694	9.75296
	14.2354	39.9387	9.25453	58.9254	21.7347	23.7638	10.5953	62.9563	19.7128	39.9387	9.25453
	14.2521	40.2534	9.52806	59.8058	21.2867	23.7741	10.3173	62.9681	20.2069	40.2534	9.52806
	14.2688	39.7657	9.67823	58.7267	21.3828	24.0059	10.4527	62.7953	19.9991	39.7657	9.67823
	14.2854	39.8547	9.61448	59.7194	21.2315	23.846	10.4387	63.1742	20.0556	39.8547	9.61448
	14.3021	39.9776	8.67328	59.7543	20.8759	23.8846	10.0563	62.8129	19.7527	39.9776	8.67328
	14.3188	40.9766	9.49522	59.5625	21.0517	23.6459	10.4173	62.5214	19.7676	40.9766	9.49522
	14.3354	40.4101	9.8721	59.144	21.3993	23.9057	10.4185	64.1816	19.4582	40.4101	9.8721
	14.3521	40.5368	9.38529	59.5954	21.5312	24.0023	10.0455	64.1562	19.8052	40.5368	9.38529
	14.3687	40.4217	8.95817	60.169	21.0849	23.9333	10.0093	63.9507	20.4883	40.4217	8.95817
	14.3854		9.49081	60.3187	20.5644	24.8844	9.94663	64.8863	19.4217		9.49081
	14.4021		9.52762	60.8186	20.7681	24.5044	9.77464	64.0108	19.4092		9.52762
	14.4187		9.05233	60.8701	20.9313	24.5704	10.2523	64.0264	19.4745		9.05233
	14.4354		9.3388	60.5586	20.4089	25.0621	10.1889	64.0843	19.6334		9.3388
	14.4521		8.70977	60.651	20.3647	24.8572	9.45325	64.9362	18.9892		8.70977
	14.4688		9.9458	61.1376	20.3362	24.8798	10.0034	64.7739	19.5423		9.9458
	14.4854		8.67275	61.5434	21.1286	24.3135	9.81375	65.09	19.6551		8.67275
	14.5021		9.29071	61.3066	20.5035	24.8985	10.0674	65.2805	19.1233		9.29071
	14.5188		9.40599	60.6595	20.6541	23.8237	9.92532	65.2928	19.6841		9.40599
	14.5354		9.77643	60.6301	20.8704	25.1496	9.72078	65.7935	18.58		9.77643
	14.5521		9.69956	61.9503	20.1296	24.6151	9.58833	65.3141	19.6852		9.69956
	14.5688		9.41121	61.7404	20.6647	25.1545	9.87417	66.4939	18.9774		9.41121
	14.5854		8.91389	61.5484	20.3789	25.0464	9.60681	65.677	19.0996		8.91389
	14.6021		9.24135	62.7119	20.273	24.7558	9.66804	65.7013	19.8944		9.24135
	14.6187		8.45504	61.812	20.2043	25.0893	10.111	65.7211	18.6772		8.45504
	14.6354		9.85171	61.736	19.9761	24.5752	9.325	66.4429	19.1421		9.85171
	14.6521		9.10125	62.4601	20.7373	23.8799	9.67508	66.7379	18.57		9.10125
	14.6687		8.94604	62.1334	20.429	24.8856	9.85826	66.3901	18.0665		8.94604
	14.6854		8.76614	61.0374	20.6741	25.119	9.7934	66.7314	19.9106		8.76614
	14.7021		9.38682	62.8172	20.5309	25.6549	9.22616	66.9662	19.2107		9.38682
	14.7188		9.20482	62.1177	20.5688	25.3274	8.91243	67.1145	18.845		9.20482
	14.7354		9.11578	62.7738	20.8958	24.8057	9.74319	67.6079	18.7699		9.11578
	14.7521		8.90311	62.0899	20.333	25.2814	9.49995	68.4886	19.0618		8.90311
	14.7688		8.80784	62.4856	19.4231	25.5995	9.38524	68.371	19.1641		8.80784
	14.7854		9.02546	63.6162	20.147	25.8867	9.73735	68.2374	18.4848		9.02546
	14.8021		8.68342	62.9594	20.3318	25.1401	9.51111	67.8083	19.0499		8.68342
	14.8188		8.46154	62.211	19.806	25.1912	9.99978	67.9323	18.479		8.46154
	14.8354		8.67834	62.7933	19.8522	25.1163	8.82659	68.6628	18.7232		8.67834
	14.8521		8.09947	62.7971	19.5221	25.5227	9.73331	67.8925	17.846		8.09947
	14.8687		8.97781	63.3859	19.3646	25.7938	9.64598	68.7985	18.6915		8.97781
	14.8854		8.57333	63.9633	19.5957	25.1033	9.25257	68.9621	17.9324		8.57333
	14.9021		8.8541	64.3561	19.2963	25.675	9.50649	69.1926	18.6412		8.8541
	14.9187		9.73208	63.9204	19.7418	26.5425	9.22735	68.3689	18.0889		9.73208
	14.9354		8.2693	64.738	19.8892	25.8693	9.48821	69.2397	18.7922		8.2693
	14.9521		9.5642	64.8066	19.1525	25.3335	13.1152	68.9866	19.4794		9.5642
	14.9688		14.5919	64.3254	19.1264	25.8425	15.6073	69.0481	25.672		14.5919
	14.9854		15.9906	64.8699	19.3644	26.5706	16.0094	69.1263	27.0624		15.9906
	15.0021		15.8722	64.8236	20.0142	26.5754	17.2319	68.4415	28.2145		15.8722
	15.0188		17.4849	65.43	19.7059	26.0335	17.6827	70.1469	29.3467		17.4849
	15.0354		17.9623	65.221	19.2626	25.8305	17.7321	69.9941	29.8087		17.9623
	15.0521		17.6896	65.7599	23.9667	26.3051	18.2908	70.3197	29.2605		17.6896
	15.0688		17.7726	65.1861	30.9208	25.927	17.5813	69.6753	30.0471		17.7726
	15.0854		18.1233	65.7216	33.4378	26.0507	18.1658	71.2491	30.5684		18.1233
	15.1021		18.1734	66.7663	33.6078	26.4792	17.5423	70.6266	29.839		18.1734
	15.1187		18.8859	65.6514	33.8481	26.2928	18.1571	70.6229	30.2988		18.8859
	15.1354		18.0152	65.7287	35.1522	25.8213	17.6449	71.0973	30.7878		18.0152
	15.1521		18.2922	66.1263	34.6441	26.4871	17.2441	71.6368	30.5657		18.2922
	15.1687		17.8655	66.4309	34.6135	26.3766	17.032	72.0873	29.7447		17.8655
	15.1854		18.1822	67.02	35.0576	26.3493	17.3869	71.0376	30.4487		18.1822
	15.2021		18.2326	66.4783	34.2013	27.1865	17.7944	70.7755	31.056		18.2326
	15.2188		18.4455	67.5019	34.7424	26.7464	17.3359	71.4414	30.4855		18.4455
	15.2354		18.1127	67.2439	34.0158	26.7961	16.4804	71.8964	29.6732		18.1127
	15.2521		18.0801	67.6733	34.0445	26.5955	17.8587	71.4496	29.2871		18.0801
	15.2688		17.6896	66.3722	34.016	26.4639	17.1041	72.4525	29.5847		17.6896
	15.2854		17.4389	67.3854	33.3508	26.6706	17.6453	72.6198	30.1825		17.4389
	15.3021		17.8855	67.1216	33.4023	26.929	17.3276	73.0476	29.6017		17.8855
	15.3188		18.0574	67.3373	34.0512	26.9123	16.6328	71.9589	30.1532		18.0574
	15.3354		18.1725	67.8607	33.0699	27.2171	16.2942	72.348	29.8467		18.1725
	15.3521		17.6425	68.9153	33.6149	27.3951	16.6845	71.6502	29.0055		17.6425
	15.3687		18.0475	68.6729	32.7595	27.8191	17.2431	73.6242	29.3654		18.0475
	15.3854		17.7822	68.2499	33.9688	27.2012	17.1398	73.2424	29.8074		17.7822
	15.4021		17.4802	68.4179	33.0963	27.0252	17.2725	72.9541	29.0362		17.4802
	15.4187		17.3647	68.4966	33.3205	27.8631	17.1646	72.2227	29.5161		17.3647
	15.4354		17.1995	68.8445	32.9272	27.6208	17.0688		28.9408		17.1995
	15.4521		17.8092	68.8792	33.1576	27.315	16.7276		28.6676		17.8092
	15.4688		17.7833	68.6848	32.6752	28.3561	17.036		28.9528		17.7833
	15.4854		17.9601	68.9531	32.6675	27.3682	16.7676		29.0407		17.9601
	15.5021		17.7218	68.6202	33.4271	27.3241	17.2511		29.4198		17.7218
	15.5188		16.8409	69.9092	32.2202	28.2102	16.5441		29.1409		16.8409
	15.5354		17.3624	70.0674	33.0758	28.1796	16.9016		28.3999		17.3624
	15.5521		17.5856	69.4214	33.0403	27.2754	16.9506		29.5685		17.5856
	15.5688		16.729	69.3253	32.7244	27.8494	16.4919		28.3663		16.729
	15.5854		17.9561	69.7405	32.0116	27.8377	16.4831		28.5465		17.9561
	15.6021		17.7767	69.3032	32.0831	28.1988	17.3457		29.1168		17.7767
	15.6187		17.5069	70.7079	32.2219	27.7435	16.55		29.4926		17.5069
	15.6354		17.8798	70.3214	31.7111	28.187	15.8133		28.5253		17.8798
	15.6521		17.576	71.3626	32.2225	28.4153	16.7566		28.4529		17.576
	15.6687		16.637	70.759	32.3503	27.4723	16.6231		27.7125		16.637
	15.6854		17.4286	70.5103	32.3474	28.374	16.0543		28.0377		17.4286
	15.7021		17.7747	71.5268	31.9652	27.8741	16.4127		28.9125		17.7747
	15.7188		17.6241	70.349	32.3662	28.1754	16.2893		28.8397		17.6241
	15.7354		17.5577	70.8852	31.7847	28.9928	16.8977		28.8351		17.5577
	15.7521		17.5942	72.0778	32.0745	28.4805	16.6807		29.08		17.5942
	15.7688		17.9271	71.7686	30.9052	28.7724	16.883		29.0821		17.9271
	15.7854		17.2033	70.854	31.5296	28.9457	16.1481		28.2634		17.2033
	15.8021		17.5998	71.3929	31.5509	29.1545	16.6354		28.281		17.5998
	15.8188		17.5295	72.2167	32.2275	29.2352	16.9037		27.6132		17.5295
	15.8354		17.3268	72.0433	31.1525	29.1109	16.6982		27.8887		17.3268
	15.8521		17.4438	71.6076	31.5216	29.886	16.481		28.1137		17.4438
	15.8687		17.7652	72.8422	31.2425	29.1711	16.2759		28.7459		17.7652
	15.8854		17.2692	73.1312	31.5685	28.9922	16.3153		28.7682		17.2692
	15.9021		17.8328	73.9621	31.254	29.5643	16.3433		27.9488		17.8328
	15.9187		17.1758	71.8906	32.163	29.3005	16.6172		28.4074		17.1758
	15.9354		17.6524	72.6501	31.0712	29.2013	16.6106		28.1202		17.6524
	15.9521		17.5274	72.6771	31.1258	30.1004	16.6329		27.1325		17.5274
	15.9688		17.6633	73.0204	31.6735	29.9231	17.0547		27.7158		17.6633
	15.9854		17.5661	73.661	31.4501	29.8756	17.1484		28.3558		17.5661
	16.0021		17.6936	73.567	31.6172	29.7214	16.3593		27.7171		17.6936
	16.0187		17.8241	74.3616	31.5825	30.2581	16.4059		27.8375		17.8241
	16.0354		17.8222	74.7558	31.0954	30.5562	16.0885		28.2962		17.8222
	16.0521		17.546	74.511	31.3256	30.1719	16.8472		28.3372		17.546
	16.0688		18.3914	73.6413	31.5897	30.2068	16.1081		28.3075		18.3914
	16.0854		17.4512	73.9887	30.8424	30.2648	16.2648		28.9289		17.4512
	16.1021		18.0664	74.0327	30.8895	30.0839	16.1453		27.8446		18.0664
	16.1187		17.7837	75.1496	31.2143	29.7822	16.1084		28.3998		17.7837
	16.1354		18.5262	75.2065	30.9884	31.2035	16.8234		28.622		18.5262
	16.1521		18.3926	75.0159	30.9612	30.6141	16.3431		28.719		18.3926
	16.1688		18.1958	74.6016	31.0416	30.9441	16.3262		28.0733		18.1958
	16.1854		17.9855	75.6575	31.7334	30.9598	16.8567		28.2304		17.9855
	16.2021		18.1013	75.629	31.3102	30.925	16.9125		28.5013		18.1013
	16.2188		18.0805	74.4653	30.8446	31.6402	16.4183		27.6971		18.0805
	16.2354		18.672	75.9176	31.0668	30.0284	16.9368		27.5678		18.672
	16.2521		18.3908	75.8567	31.9123	31.3186	16.8606		28.17		18.3908
	16.2687		18.1603	75.1556	31.3539	31.9162	17.1818		28.3406		18.1603
	16.2854		18.7668	76.2586	31.5511	31.3879	17.1746		27.7937		18.7668
	16.3021		16.995	76.9656	31.4004	31.8916	17.4217		28.3761		16.995
	16.3188		18.8639	76.1451	30.7303	31.5928	17.2586		27.9385		18.8639
	16.3354		19.064	76.8242	30.6447	31.7189	17.1811		28.2226		19.064
	16.3521		18.7758	77.1639	30.844	32.4411	17.2378		28.9708		18.7758
	16.3687		18.1978	77.6721	30.7333	31.7172	16.6783		27.6563		18.1978
	16.3854		18.2939	76.7984	31.5151	32.0594	16.8388		27.3478		18.2939
	16.4021		17.9611	78.5566	30.6488	31.5151	17.3346		28.0166		17.9611
	16.4188		18.3945	77.0178	31.4236	31.3075	16.9289		28.6199		18.3945
	16.4354		18.3869	76.5957	30.5941	32.8357	16.7997		28.2304		18.3869
	16.4521		18.6737	77.4523	31.0613	32.252	16.4694		28.1675		18.6737
	16.4688		18.3494	77.0325	30.8986	32.5239	17.407		28.7419		18.3494
	16.4854		18.7049	78.157	30.9578	31.5773	17.4027		27.8506		18.7049
	16.5021		18.9727	76.7005	30.6415	32.6002	17.0226		28.3121		18.9727
	16.5187		19.2498	77.4006	31.594	32.1215	17.4248		28.2652		19.2498
	16.5354		18.5381	78.312	30.8091	32.7864	17.8447		28.5322		18.5381
	16.5521		18.3763	77.7125	31.3312	32.5304	16.6741		28.3221		18.3763
	16.5688		18.5025	77.6537	31.1858	32.6883	17.9327		28.7357		18.5025
	16.5854		18.6758	77.5909	30.7664	32.7434	17.5475		29.1487		18.6758
	16.6021		18.9845	78.2327	31.1152	33.1763	17.093		28.135		18.9845
	16.6187		19.208	77.3917	31.7063	32.6193	17.5296		28.6043		19.208
	16.6354		19.0659	77.9791	30.848	33.311	17.4591		28.5132		19.0659
	16.6521		19.7263	79.3393	30.5037	33.3596	17.1133		28.9137		19.7263
	16.6688		19.9654	78.5592	31.3193	33.2423	18.2123		28.529		19.9654
	16.6854		18.6215		30.6759	32.8839	17.2831		28.3363		18.6215
	16.7021		19.2438		30.7507	33.9948	17.2255		29.1553		19.2438
	16.7188		19.1213		31.1335	33.1795	17.6166		28.4444		19.1213
	16.7354		19.9042		32.2689	34.0433	18.0611		27.9361		19.9042
	16.7521		19.7725		30.5165	33.0691	17.693		28.5972		19.7725
	16.7687		19.3383		30.8773	33.7262	17.0188		27.71		19.3383
	16.7854		19.4555		31.4956	33.6232	17.5637		28.9264		19.4555
	16.8021		19.0225		31.1241	33.8529	17.4972		27.963		19.0225
	16.8188		20.3215		32.0084	33.036	17.9552		28.7214		20.3215
	16.8354		19.4338		30.7561	34.2217	17.7204		29.0339		19.4338
	16.8521		19.6611		30.9056	33.6108	17.7419		28.1458		19.6611
	16.8687		19.7494		31.5866	34.3318	18.2105		28.4777		19.7494
	16.8854		19.4919		30.5338	34.8297	17.7172		28.3822		19.4919
	16.9021		20.214		31.0634	34.6086	18.2531		28.0013		20.214
	16.9188		19.2299		31.0601	34.8029	18.1526		28.7143		19.2299
	16.9354		19.8128		31.4091	34.1468	18.4455		31.1732		19.8128
	16.9521		20.1606		31.5254	35.2723	18.1048		34.1416		20.1606
	16.9688		18.7993		31.9046	34.4565	20.5711		37.086		18.7993
	16.9854		19.4216		37.3589	35.361	23.6478		37.2203		19.4216
	17.0021		20.3731		40.3669	35.2348	25.5276		38.3131		20.3731
	17.0187		19.8414		41.6003	35.0763	24.9914		38.0106		19.8414
	17.0354		20.7981		43.4612	35.0924	25.5429		39.4824		20.7981
	17.0521		20.1506		43.7423	35.2784	25.4404		38.9375		20.1506
	17.0688		20.2061		43.7908	36.3164	25.9524		38.8303		20.2061
	17.0854		19.9429		43.1769	34.8561	26.0067		38.5203		19.9429
	17.1021		19.8831		44.0645	35.4219	25.1304		39.8696		19.8831
	17.1187		20.8172		44.3118	36.5631	25.5531		39.0897		20.8172
	17.1354		20.8968		44.0588	35.5837	25.4973		39.1957		20.8968
	17.1521		20.6889		44.5536	35.8618	25.8513		39.5391		20.6889
	17.1688		20.3674		43.8476	36.747	26.1852		39.0083		20.3674
	17.1854		20.7922		43.424	36.8366	26.068		39.1011		20.7922
	17.2021		20.8277		43.0119	36.9536	26.1301		38.7387		20.8277
	17.2188		20.4775		44.0689	36.9326	25.9535		39.7625		20.4775
	17.2354		20.1233		43.9325	36.7566	25.8159		39.6562		20.1233
	17.2521		20.5506		43.5439	36.1561	25.8978		39.0254		20.5506
	17.2687		21.0457		43.3492	36.1335	25.6459		39.7982		21.0457
	17.2854		20.6367		44.1029	37.1869	26.1665		39.3637		20.6367
	17.3021		20.4093		43.759	37.2357	25.5004		38.596		20.4093
	17.3188		20.2254		43.1329	36.9563	26.2223		39.2494		20.2254
	17.3354		21.7335		44.4926	37.2499	26.924		38.808		21.7335
	17.3521		21.2936		43.436	37.5134	26.1615		39.3774		21.2936
	17.3687		20.9696		44.2749	37.0663	26.0735		39.057		20.9696
	17.3854		21.1086		43.9625	37.4572	26.2507		40.1912		21.1086
	17.4021		21.2487		43.5901	37.8836	26.0426		39.424		21.2487
	17.4188		20.9363		43.9789	37.7309	26.9452		38.8641		20.9363
	17.4354		20.9499		44.0876	38.0661	26.6302		39.2073		20.9499
	17.4521		21.6063		44.1747	37.3923	26.5155		39.6318		21.6063
	17.4688		21.7075		43.8656	38.471	25.8981		39.0224		21.7075
	17.4854		21.4806		43.5902	37.9525	25.5284		38.9692		21.4806
	17.5021		21.3944		43.8109	37.9565	26.5861		40.2246		21.3944
	17.5187		21.2225		44.0074	37.6085	26.4829		39.6403		21.2225
	17.5354		21.0274		44.1383	38.0276	26.9994		39.9231		21.0274
	17.5521		21.1159		44.1433	39.3509	26.8477		40.536		21.1159
	17.5688		21.4685		44.5396	39.3563	26.9292		39.8113		21.4685
	17.5854		21.87		43.8958	38.7981	27.2572		39.7263		21.87
	17.6021		21.6126		44.4345	38.8892	27.1993		39.8602		21.6126
	17.6187		22.126		44.1623	38.2891	26.7478		40.6049		22.126
	17.6354		21.9847		43.7182	38.8605	27.4348		40.4089		21.9847
	17.6521		21.7628		44.7395	39.0171	26.649		39.9448		21.7628
	17.6688		22.1321		44.0972	39.3881	27.5338		39.8532		22.1321
	17.6854		21.4012		43.7785	40.0042	26.9008		40.5031		21.4012
	17.7021		22.5092		44.0851	39.0707	27.3236		40.6533		22.5092
	17.7188		21.9933		44.4519	40.1975	26.8677		41.0297		21.9933
	17.7354		21.5781		44.0887	40.1445	27.3332		39.8376		21.5781
	17.7521		22.1802		45.0514	39.4604	28.113		40.2207		22.1802
	17.7687		23.317		44.5647	40.2558	28.0558		40.3294		23.317
	17.7854		22.5626		43.7568	40.1442	27.6493		41.0104		22.5626
	17.8021		22.9655		44.4348	39.9172	27.5133		40.6399		22.9655
	17.8188		22.9285		45.2626	40.9319	28.0719		40.5337		22.9285
	17.8354		22.1647		45.1041	40.125	27.8581		40.2533		22.1647
	17.8521		22.5454		43.8599	40.7977	27.7234		40.8015		22.5454
	17.8687		22.7307		44.5048	41.3645	28.4098		40.3624		22.7307
	17.8854		23.1227		45.1931	41.0492	27.7054		40.4786		23.1227
	17.9021		22.9154		44.9124	41.617	28.0247		40.1125		22.9154
	17.9188		22.5823		45.6079	40.4484	28.6695		40.701		22.5823
	17.9354		22.7282		45.6373		28.6088		41.0992		22.7282
	17.9521		23.2221		44.8212		29.0251		40.9822		23.2221
	17.9688		22.2838		45.327		28.3763		41.4227		22.2838
	17.9854		23.7628		44.8819		28.4291		41.8275		23.7628
	18.0021		22.9734		45.4593		29.1596		41.5702		22.9734
	18.0187		23.1303		45.3759		28.5789		41.747		23.1303
	18.0354		23.2962		45.5221		28.7869		41.1955		23.2962
	18.0521		22.9355		44.7865		28.8572		41.549		22.9355
	18.0688		23.1328		45.1138		28.515		40.9453		23.1328
	18.0854		23.5776		45.5912		29.7845		41.4149		23.5776
	18.1021		23.5388		45.2701		29.1716		42.3433		23.5388
	18.1187		22.9598		45.816		29.1898		41.9632		22.9598
	18.1354		23.1435		46.9424		28.9537		42.4287		23.1435
	18.1521		22.6143		45.4066		29.3912		42.2552		22.6143
	18.1688		23.7952		45.463		29.9111		41.6693		23.7952
	18.1854		24.0603		46.293		29.0196		42.8273		24.0603
	18.2021		23.7286		46.3534		29.5717		41.763		23.7286
	18.2188		23.6424		45.6535		29.5087		42.04		23.6424
	18.2354		24.0245		46.7432		29.8064		42.107		24.0245
	18.2521		23.7884		45.4926		30.3752		42.6895		23.7884
	18.2687		24.6109		46.3154		30.442		42.6475		24.6109
	18.2854		23.9175		46.4081		30.6136		41.8153		23.9175
	18.3021		23.9723		47.0458		30.0348		42.9459		23.9723
	18.3188		24.3424		46.7535		30.8609		41.931		24.3424
	18.3354		23.6676		47.2388		30.8331		42.3589		23.6676
	18.3521		24.5814		46.726		30.6783		42.8844		24.5814
	18.3687		24.8274		47.996		30.6257		43.3963		24.8274
	18.3854		23.9186		47.3018		30.9043		42.5625		23.9186
	18.4021		24.5018		46.9817		30.7714		43.6211		24.5018
	18.4188		24.343		47.4281		31.1734		44.2729		24.343
	18.4354		24.2586		46.6513		31.1044		43.3135		24.2586
	18.4521		24.323		47.7878		31.1212		43.2445		24.323
	18.4688		24.8853		47.3277		31.1627		44.7394		24.8853
	18.4854		25.185		48.5373		31.4717		43.6375		25.185
	18.5021		25.4738		48.3456		31.3962		43.2965		25.4738
	18.5187		24.8482		47.2578		30.9002		45.2864		24.8482
	18.5354		24.7469		47.6614		32.1695		43.0907		24.7469
	18.5521		25.2833		47.4617		32.5841		43.5231		25.2833
	18.5688		23.9471		47.4472		31.1862		42.888		23.9471
	18.5854		25.0719		48.9279		31.8943		44.9559		25.0719
	18.6021		25.8425		48.722		32.1239		43.6053		25.8425
	18.6187		25.3424		48.1094		32.3509		43.9708		25.3424
	18.6354		25.3		49.4039		32.0031		44.9919		25.3
	18.6521		26.026		48.8293		32.7295		44.0064		26.026
	18.6688		25.0581		48.8648		32.8482		43.7804		25.0581
	18.6854		25.8508		48.6645		32.4366		44.2379		25.8508
	18.7021		26.2585		49.4124		32.5396		44.6529		26.2585
	18.7188		25.9831		49.0922		32.94		44.464		25.9831
	18.7354		25.5883		48.4905		33.0109		43.7269		25.5883
	18.7521		25.701		49.3366		32.8995		45.6743		25.701
	18.7687		25.8457		49.092		33.1166		44.9628		25.8457
	18.7854		26.0458		47.8041		33.486		45.691		26.0458
	18.8021		26.3904		50.3801		33.1255		45.0913		26.3904
	18.8188		26.5049		49.8975		33.6639		45.4759		26.5049
	18.8354		26.3765		49.7936		33.4858		45.8813		26.3765
	18.8521		26.5716		49.8692		33.7792		45.9806		26.5716
	18.8687		26.2848		48.7399		34.5564		46.2667		26.2848
	18.8854		27.2498		50.0484		34.4277		45.815		27.2498
	18.9021		26.8869		49.8047		34.2554		45.2572		26.8869
	18.9188		27.2816		50.049		34.4068		45.7049		27.2816
	18.9354		26.0122		50.6457		35.2388		46.2123		26.0122
	18.9521		27.1391		49.6582		35.2494		45.5854		27.1391
	18.9688		26.4711		50.2469		34.7216		46.2926		26.4711
	18.9854		27.5654		49.6508		33.9715		45.3075		27.5654
	19.0021		27.4054		50.5479		34.6304		46.1568		27.4054
	19.0187		26.647		50.3621		35.1322		47.1353		26.647
	19.0354		27.4589		50.5817		35.5093		45.8038		27.4589
	19.0521		27.6626		50.4044		34.9976		46.2442		27.6626
	19.0688		27.5664		51.961		35.5611		46.285		27.5664
	19.0854		27.3107		51.4542		35.4095		47.1709		27.3107
	19.1021		27.2314		51.4581		35.2509		47.7084		27.2314
	19.1187		27.6428		51.1626		35.657		46.2524		27.6428
	19.1354		27.5765		51.0554		35.9429		47.4503		27.5765
	19.1521		27.929		51.9516		35.1035		47.4179		27.929
	19.1688		28.0005		51.8432		35.7592		47.1388		28.0005
	19.1854		28.212		51.7714		36.7366		47.6226		28.212
	19.2021		28.1062		52.7304		35.7037		46.7216		28.1062
	19.2188		27.9621		52.5206		36.1377		47.9981		27.9621
	19.2354		27.8512		52.4237		36.3038		47.5638		27.8512
	19.2521		27.9954		51.7688		36.1413		47.8195		27.9954
	19.2687		28.3388		52.2577		36.6234		47.5598		28.3388
	19.2854		28.3844		52.6174		36.6483		48.5689		28.3844
	19.3021		28.8005		53.1865		36.4529		47.568		28.8005
	19.3188		28.4765		52.4223		36.7225		48.041		28.4765
	19.3354		28.9585		53.1987		37.0505		48.5064		28.9585
	19.3521		28.587		53.2525		37.5716		47.816		28.587
	19.3687		27.9708		52.5313		37.5231		48.4995		27.9708
	19.3854		28.8559		53.475		36.9238		48.6778		28.8559
	19.4021		29.1621		53.2206		37.0975		49.0134		29.1621
	19.4188		28.9576		53.7331		37.397		48.3564		28.9576
	19.4354		30.0293		53.5836		37.2155		48.4668		30.0293
	19.4521		29.2231		53.3186		36.9372		49.4665		29.2231
	19.4688		29.5834		53.3737		37.4118		49.4397		29.5834
	19.4854		29.7474		54.2449		38.0132		49.1398		29.7474
	19.5021		29.2404		53.776		37.7683		48.4407		29.2404
	19.5187		30.0498		54.7992		38.2437		48.5128		30.0498
	19.5354		29.5273		55.1006		37.9131		49.2327		29.5273
	19.5521		29.6481		54.13		37.9476		49.2939		29.6481
	19.5688		29.2096		54.7654		38.8098		50.9291		29.2096
	19.5854		30.0112		55.1842		38.1344		49.2185		30.0112
	19.6021		30.258		54.3728		38.7254		49.8586		30.258
	19.6187		30.3318		54.8862		39.1709		50.0469		30.3318
	19.6354		29.9366		55.3237		38.8136		50.4842		29.9366
	19.6521		30.7947		55.135		38.0211		50.2321		30.7947
	19.6688		30.4417		55.4562		39.4539		50.1608		30.4417
	19.6854		29.8253		54.9551		39.4741		49.9827		29.8253
	19.7021		29.8789		55.8672		39.002		51.0796		29.8789
	19.7188		29.646		55.0805		39.8035		51.1636		29.646
	19.7354		30.3816		55.6043		39.5494		51.4514		30.3816
	19.7521		30.766		56.2579		39.8208		50.1055		30.766
	19.7687		30.2683		55.5985		39.7737		50.9582		30.2683
	19.7854		31.1288		57.2686		39.5046		50.443		31.1288
	19.8021		31.222		56.0005		39.9113		50.5564		31.222
	19.8188		31.1113		56.3405		40.2266		50.6665		31.1113
	19.8354		31.4989		56.3412		40.509		51.9068		31.4989
	19.8521		31.2564		57.4154		40.3078		51.2966		31.2564
	19.8687		32.0067		56.2346		40.6265		50.978		32.0067
	19.8854		30.9473		56.3819		40.7402		51.3814		30.9473
	19.9021		31.8599		56.7378		40.0847		52.301		31.8599
	19.9188		32.0485		56.5928		40.2512		52.3022		32.0485

## Sheet: Heart Perfusion
	Cardiac function data for IR injury experiments
	Pre-Isch' time set at 10 min. Then 25 min. Isch', so zero reperfusion = 35 min.
	RPP = Heart Rate (bpm) x LV developed pressure (mmHg)
			RPP									RPP %
	Fig 5 Suppl 1 A		10	35	45	55	65	75	85	95		10	35	45	55	65	75	85	95
	Dimethyl-L-2-HG	Ctrl 1	38911	0	1237.56	7621.5	8766.4	10216.1	10100.8	10865.3		100	0	3.18047	19.587	22.5293	26.2551	25.9587	27.9235
		Ctrl 2	34999.7	0	3972.75	4888.64	6575.36	5988.9	7573.82	13131.4		100	0	11.3508	13.9677	18.7869	17.1113	21.6397	37.5187
		Ctrl 3	29039.7	0	368.24	268.196	438.803	1136.06	2872.16	2220.33		100	0	1.26806	0.923548	1.51105	3.91208	9.89046	7.64584
		Ctrl 4	38236	0	87.2347	251.03	2186.39	2145.06	1493.35	4783.03		100	0	0.228148	0.656528	5.71814	5.61006	3.90563	12.5092
		Ctrl 5	24686.3	0	328.974	3744.71	4388.18	4051.53	3752.65	3775.78		100	0	1.33262	15.1692	17.7758	16.4121	15.2013	15.295
		AV	34316.8	0	1859.52	4259.45	5260.19	5780.37	6848.93	8739.02		100	0	3.47203	10.0608	13.2642	13.8601	15.3192	20.1785
		SE	2869.99	0	1086.01	2145.9	2492.29	2623.27	2117.97	3324.34		0	0	2.0263	3.89895	4.07294	4.10942	3.95539	5.47905
		DM2HG 1	40800.5	0	11538.4	10139.5	13882.8	19738.2	15338.1	16150.6		100	0	28.2801	24.8513	34.0262	48.3775	37.5929	39.5843
		DM2HG 2	35213.7	0	5260.65	10737.6	12509.6	14417.8	15144	15978.5		100	0	14.9392	30.4926	35.5247	40.9438	43.0059	45.3758
		DM2HG 3	25502.2	0	578.664	6291	8123.4	6076.87	7914.57	9666.38		100	0	2.26907	24.6684	31.8537	23.8288	31.0348	37.904
		DM2HG 4	29518.6	0	1494.12	6169.13	8976.04	10457.7	9000.04	9026.96		100	0	5.06164	20.8991	30.4081	35.4274	30.4894	30.5806	P
		AV	32758.7	0	4717.96	8334.29	10873	12672.6	11849.2	12705.6		100	0	12.6375	25.2279	32.9532	37.1444	35.5308	38.3612	0.0311817
		SE	3339.81	0	2488.97	1221.25	1381.31	2906.58	1971.19	1943.99		0	0	5.87995	1.97716	1.1347	5.171	2.96871	3.0475

## Sheet: Infarcts
	Cardiac infarct data from post IR TTC staining
	Fig 5 Suppl 1 B		Infarct	Live	Infarct %	X-Axis
	Dimethyl-L-2-HG	Ctrl 1	90614.8	122156	42.588	1
		Ctrl 2	58328.5	158379	26.9158	1
		Ctrl 3	89472.5	145478	38.0815	1
		Ctrl 4	9349.5	20372.8	31.4562	1
		Ctrl 5	15212.8	14657.2	50.9301	1
				AV	37.9943	2
				SE	4.20669
		DM2HG 1	43370.2	117696	26.927	3.1
		DM2HG 2	60683.8	128767	32.0314	2.9
		DM2HG 3	37028.8	112736	24.7247	2.9
		DM2HG 4	60354.8	124109	32.719	3.1	P
				AV	29.1005	4	0.122691
				SE	1.94842

## Sheet: WB Quant
Densitometric quantitation of western blots. Protein of interest relative to Ponceau S.
	Fig 5 S2 B	Anti-LonP1
		WT	KO
		0.221907	0.306585
		0.253636	0.210902
		0.389519	0.352547
		0.242729	0.573525
		0.296923	0.567768
	Ave	0.280943	0.402265
	SE	0.0297787	0.0724455
	P	0.19168
	Fig 5 S2 B	Anti-ClpP
		WT	KO
		0.359404	0.544396
		0.286208	0.319045
		0.503663	0.786626
		0.280446	0.480364
		0.437221	0.47936
	Ave	0.373388	0.521958
	SE	0.0432899	0.075918
	P	0.0371817
	Fig 5 S2 D	Anti-Hspd1
		WT	KO
		0.284182	0.218582
		0.30024	0.220781
		0.328773	0.212434
		0.334078	0.248519
	Ave	0.311818	0.225079
	SE	0.0118349	0.00801055
	P	0.00393833
