# Supplementary material for: ALKBH7 mediates necrosis via rewiring of glyoxal metabolism
Source: eLife journal article supplement (doi:10.7554/elife.58573), 2020-08-14
Supplement: supp [file elife-58573-supp-v1.zip › elife_poa_e58573_Source_data_6.xlsx]

## Sheet: Heart Perfusion
	Cardiac function data for IR injury experiments
	Pre-Isch' time set at 10 min. Then 25 min. Isch', so zero reperfusion = 35 min.
	RPP = Heart Rate (bpm) x LV developed pressure (mmHg)
	Fig 6A	RPP									RPP %
	SBB-GSH-CpE	0	10	35	45	55	65	75	85	95	0	10	35	45	55	65	75	85	95
	WT1	61785	52836	0	2016	672	5940	6468	7644	7056	100	85.5159	0	3.26293	1.08764	9.61398	10.4686	12.3719	11.4202
	WT2	51912	51072	0	3240	13716	11016	12708	12600	11880	100	98.3819	0	6.24133	26.4216	21.2205	24.4799	24.2718	22.8849
	WT3	48342	46371	0	1950	4752	14652	14832	15948	16164	100	95.9228	0	4.03376	9.82996	30.309	30.6814	32.9899	33.4368
	WT4	46224	43596	0	3240	3234	5994	6552	6192	6984	100	94.3146	0	7.00935	6.99637	12.9673	14.1745	13.3956	15.109
	WT5	50400	36000	0	4050	1368	6642	7722	7980	8400	100	71.4286	0	8.03571	2.71429	13.1786	15.3214	15.8333	16.6667
	AV	51732.6	45975	0	2899.2	4748.4	8848.8	9656.4	10072.8	10096.8	100	89.1128	0	5.71662	9.40998	17.4579	19.0251	19.7725	19.9035
	SE	2689.79	2986.38	0	402.346	2353.25	1729.95	1726.91	1819.95	1757.92	0	4.92453	0	0.899369	4.52489	3.73708	3.7154	3.91085	3.8566
	KO1	65484	49104	0	1290	2268	2442	2856	3900	4320	100	74.9863	0	1.96995	3.46344	3.72916	4.36137	5.95565	6.59703
	KO2	56340	20580	0	1470	2916	4074	3744	4536	3660	100	36.5282	0	2.60916	5.17572	7.2311	6.64537	8.05112	6.49627
	KO3	56835	44058	0	1110	1890	3294	2160	3570	3444	100	77.5191	0	1.95302	3.32542	5.79572	3.80048	6.28134	6.05965
	KO4	62016	31644	0	744	2484	3132	2394	2310	3840	100	51.0255	0	1.19969	4.00542	5.05031	3.86029	3.72485	6.19195
	KO5	65940	12024	0	216	198	240	330	690	900	100	18.2348	0	0.327571	0.300273	0.363967	0.500455	1.04641	1.36488	P
	AV	61323	31482	0	966	1951.2	2636.4	2296.8	3001.2	3232.8	100	51.6588	0	1.61188	3.25405	4.43405	3.83359	5.01187	5.34196	0.00644669
	SE	2050.41	6950.48	0	222.656	468.643	652.889	561.407	682.143	600.823	0	11.3124	0	0.391057	0.80719	1.16447	0.982249	1.20666	0.999059
	Fig 6 Suppl 1A		RPP									RPP %
	Young Male No Glucose		10	35	45	55	65	75	85	95		10	35	45	55	65	75	85	95
		WT1	53004	0	1944	2862	8880	11154	9240	11772		100	0	3.66765	5.39959	16.7535	21.0437	17.4326	22.2096
		WT2	50568	0	3180	2844	2898	4428	7326	4716		100	0	6.28856	5.62411	5.7309	8.75653	14.4874	9.32606
		WT3	73494	0	360	1044	1080	3864	3990	3864		100	0	0.489836	1.42052	1.46951	5.25757	5.42901	5.25757
		WT4	57582	0	720	5232	6510	6594	6300	6357		100	0	1.25039	9.08617	11.3056	11.4515	10.9409	11.0399
		WT5	54216	0	600	1518	1944	2592	1320	1008		100	0	1.10668	2.79991	3.58566	4.78088	2.43471	1.85923
		AV	57772.8	0	1360.8	2700	4262.4	5726.4	5635.2	5543.4		100	0	2.56062	4.86606	7.76903	10.258	10.1449	9.93848
		SE	4089.58	0	531.067	727.924	1478.82	1503.17	1371.55	1782.31		0	0	1.078	1.31927	2.77998	2.95815	2.77749	3.45944
		KO1	58464	0	1590	2160	1584	1518	2088	2880		100	0	2.71962	3.69458	2.70936	2.59647	3.57143	4.92611
		KO2	45144	0	936	4686	8586	8964	7098	7098		100	0	2.07337	10.3801	19.0191	19.8565	15.723	15.723
		KO3	48048	0	1536	3834	10656	9450	8340	4464		100	0	3.1968	7.97952	22.1778	19.6678	17.3576	9.29071
		KO4	55584	0	3480	9216	7770	9108	7596	8100		100	0	6.26079	16.5803	13.9788	16.386	13.6658	14.5725
		KO5	60480	0	1260	1890	1440	3168	5400	4896		100	0	2.08333	3.125	2.38095	5.2381	8.92857	8.09524	P
		AV	53544	0	1760.4	4357.2	6007.2	6441.6	6104.4	5487.6		100	0	3.26678	8.35191	12.0532	12.749	11.8493	10.5215	0.887982
		SE	2976.93	0	445.334	1321.07	1894.64	1695.3	1114.4	938.492		0	0	0.777598	2.45937	4.09634	3.68172	2.507	2.02703

## Sheet: Infarcts
	Cardiac infarct data from post IR TTC staining
	Fig 6B		Infarct	Live	Infarct %	X-Axis
	SBB-GSH-CpE	WT1	142485	103140	58.0092	1
		WT2	150608	128527	53.9553	1.1
		WT3	124135	165598	42.8446	0.9
		WT4	107758	103695	50.9607	0.9
		WT5	105573	124975	45.7922	1.1
				AV	50.3124	2
				SE	2.73067
		KO1	156979	48741	76.3071	3.1
		KO2	163516	57724	73.9089	2.9
		KO3	195280	89905	68.4748	3.1
		KO4	207440	100213	67.4266	2.9
		KO5	163797	28113	85.3509	3	P
					74.2937	4	0.000465403
					3.22087
	Fig 6 Suppl 1 B		Infarct	Live	Infarct %	X-Axis
	Young Male No Glucose	WT1	109497	51380	68.0626	1
		WT2	133907	106152	55.7809	0.9
		WT3	119279	72665	62.1426	1
		WT4	101292	86758	53.8644	1
		WT5	164647	123124	57.2146	1.1
				AV	59.413	2
				SE	2.56006
		KO1	150768	37357	80.1425	3
		KO2	153070	46122	76.8455	3
		KO3	141963	22357	86.3942	3
		KO4	153785	56836	73.015	3
		KO5	160546	88415	64.4864	3	P
				AV	76.1767	4	0.00557274
				SE	3.65535

## Sheet: GLO-1 Inhib
Measurement of GLO-1 activity in hearts treated with SBB-GSH-CpE
Extinction coefficient 2.86 mM^-1 cm^-1
No Figure, result in text only
	Experiment 1			Experiment 2
	Control	SBB-GSH-CpE		Control	SBB-GSH-CpE
Baseline slope (AU/min)	0.00277725	0.00264899		0.00334718	0.00360294
Slope w. sample (AU/min)	0.038906	0.0148755		0.042021	0.0100109
Baseline corrected slope (AU/min)	0.0361287	0.0122265		0.0386738	0.00640795
mmols/min/liter	0.0126324	0.00427499		0.0135223	0.00224054
nmols/min/mL	12.6324	4.27499		13.5223	2.24054
Protein conc mg/mL	2.7512	1.2901		2.7512	0.7572
Protein added (mg) in 5 uL	0.013756	0.0064505		0.013756	0.003786
nmols/min/mg protein	918.321	662.738		983.011	591.797
umols/min/mg protein	0.918321	0.662738		0.983011	0.591797	Ave	SD
Activity (% vs. control)		72.1685			60.2024	66.1855	8.46126
% inhibition		27.8315			39.7976	33.8145	8.46126

## Sheet: WB Quant
Densitometric quantitation of western blots. Protein of interest relative to Ponceau S.
	Fig 6 C	Anti-DJ-1
		WT	KO
		0.497455	0.545389
		0.501879	0.436819
		0.350019	0.317144
	Ave	0.449784	0.433117
	SE	0.049899	0.0659146
	P	0.669104
