# Supplementary figures and images for: ALKBH7 mediates necrosis via rewiring of glyoxal metabolism
Source: eLife journal article supplement (doi:10.7554/elife.58573), 2020-08-14

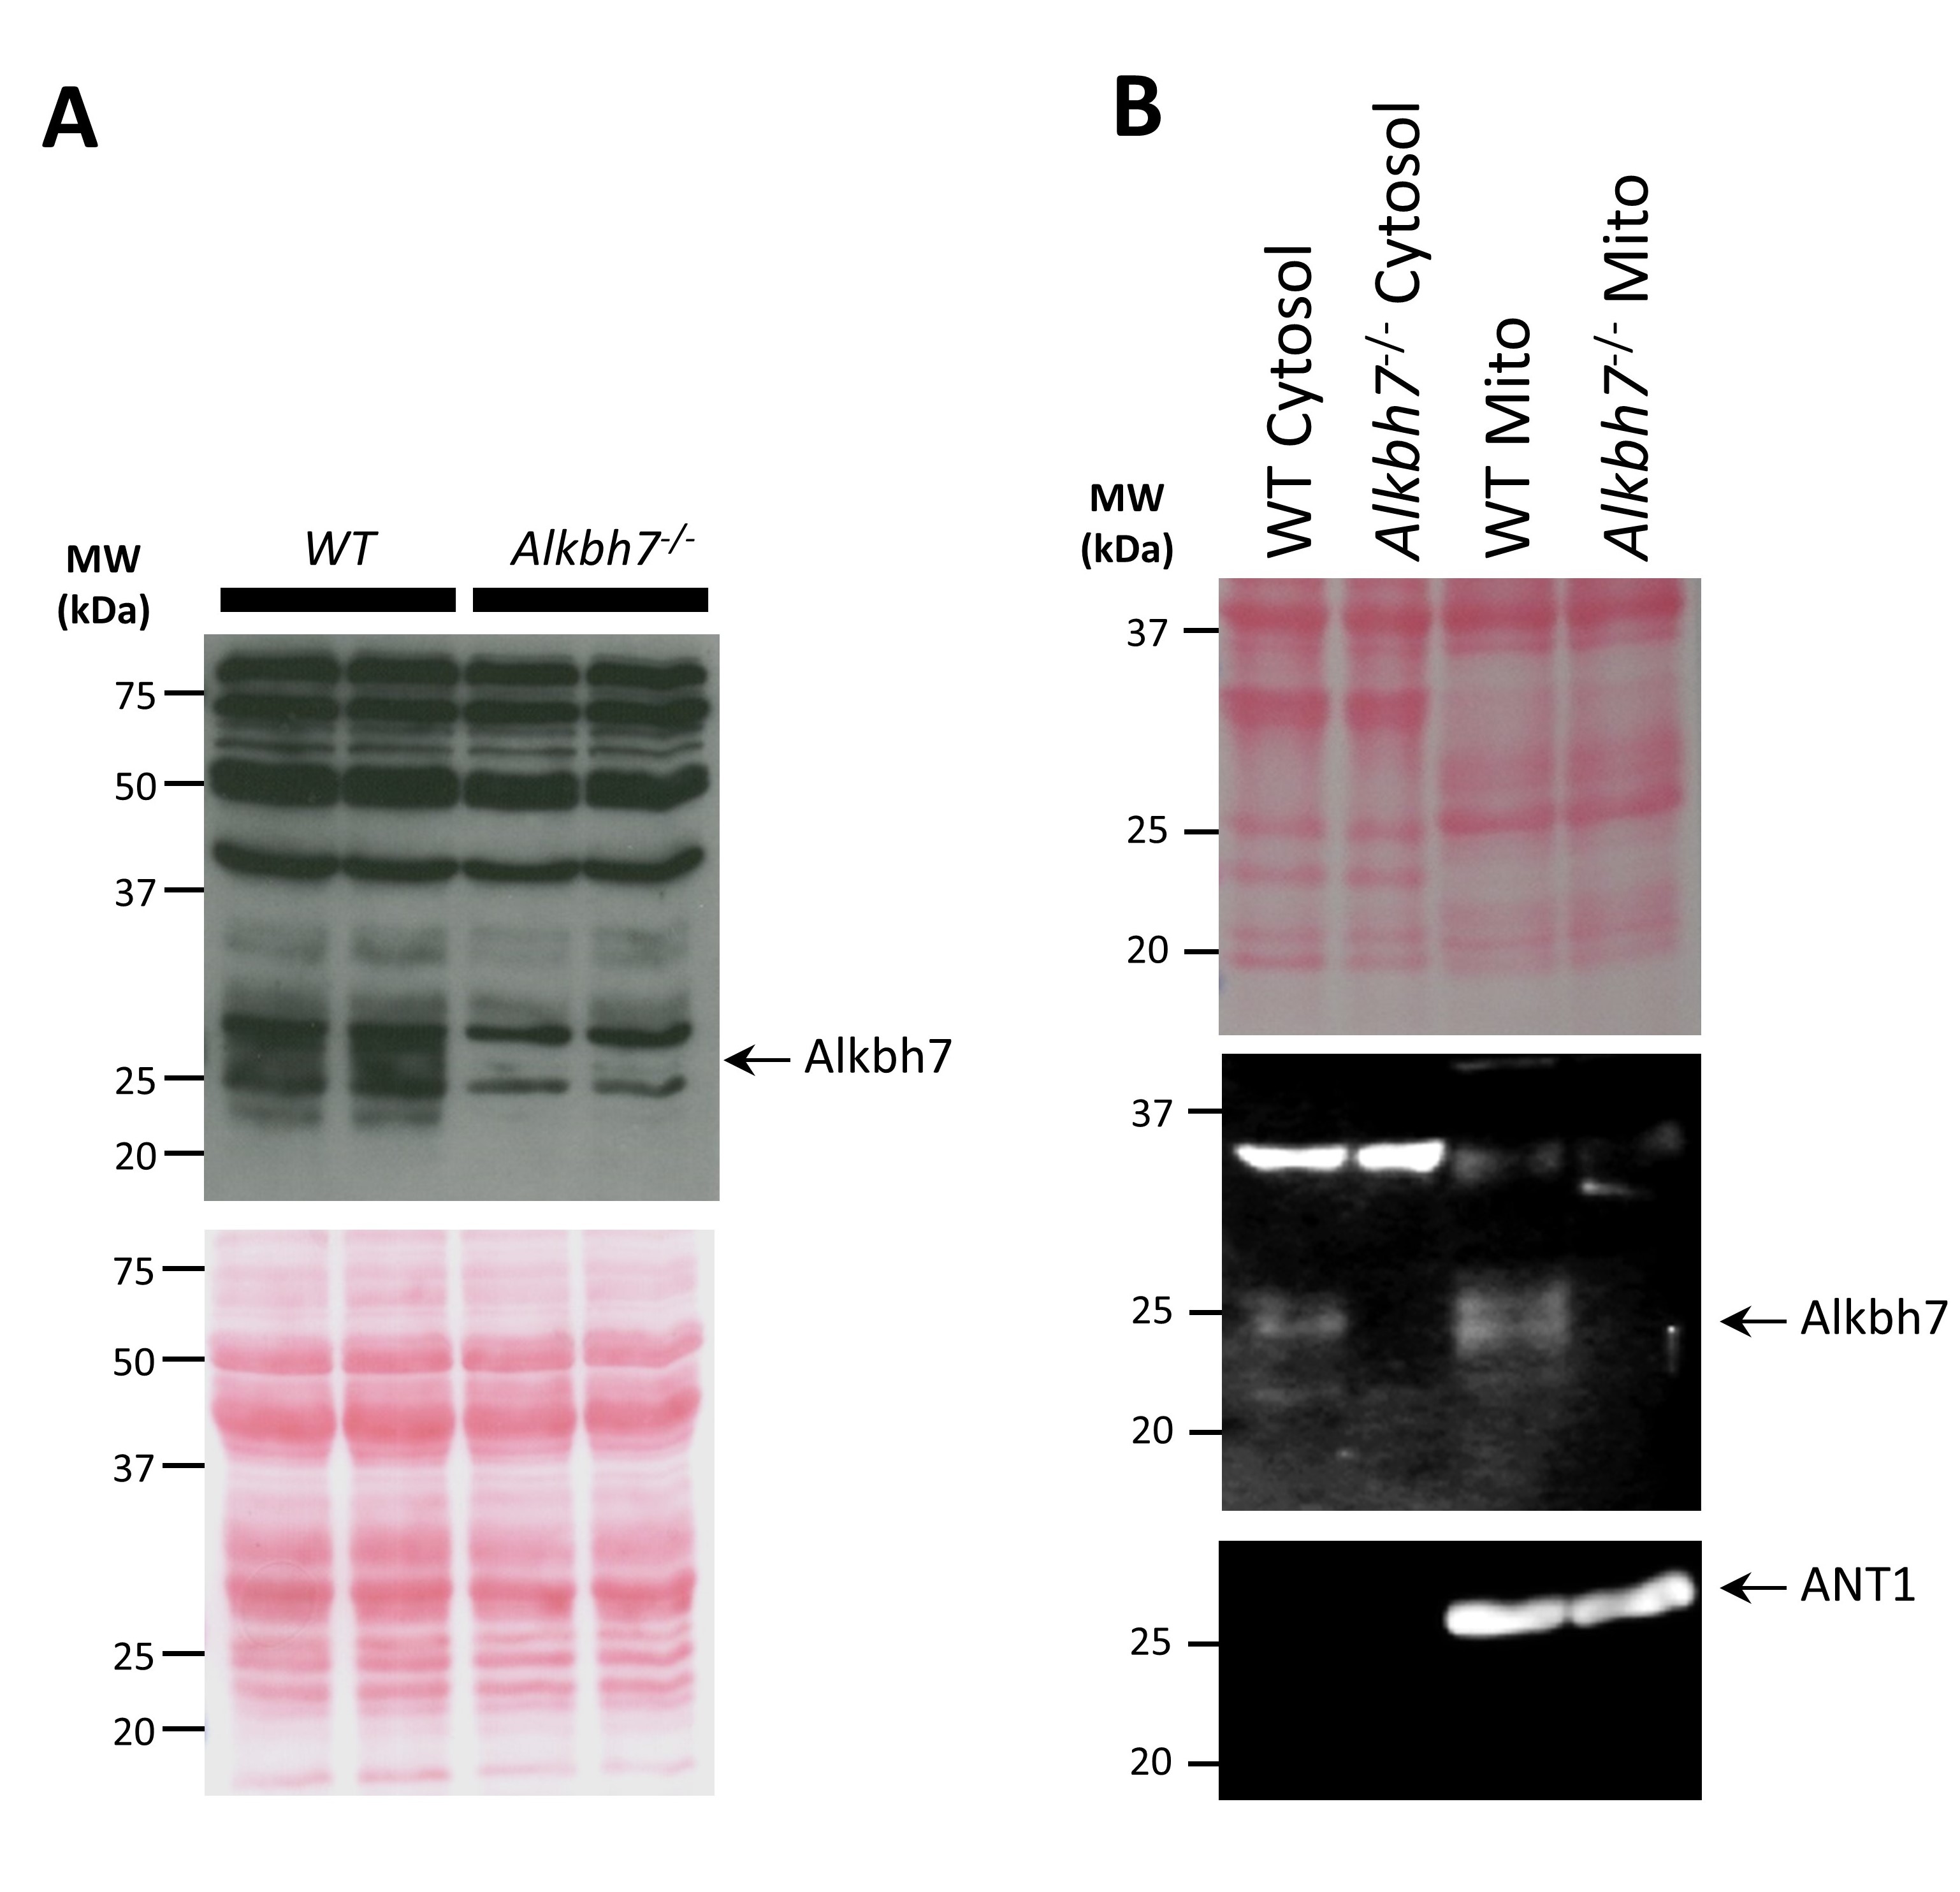

Supplement: supp [file elife-58573-supp-v1.zip › elife_poa_e58573_Figure_1_figure_supplement_1.jpg]

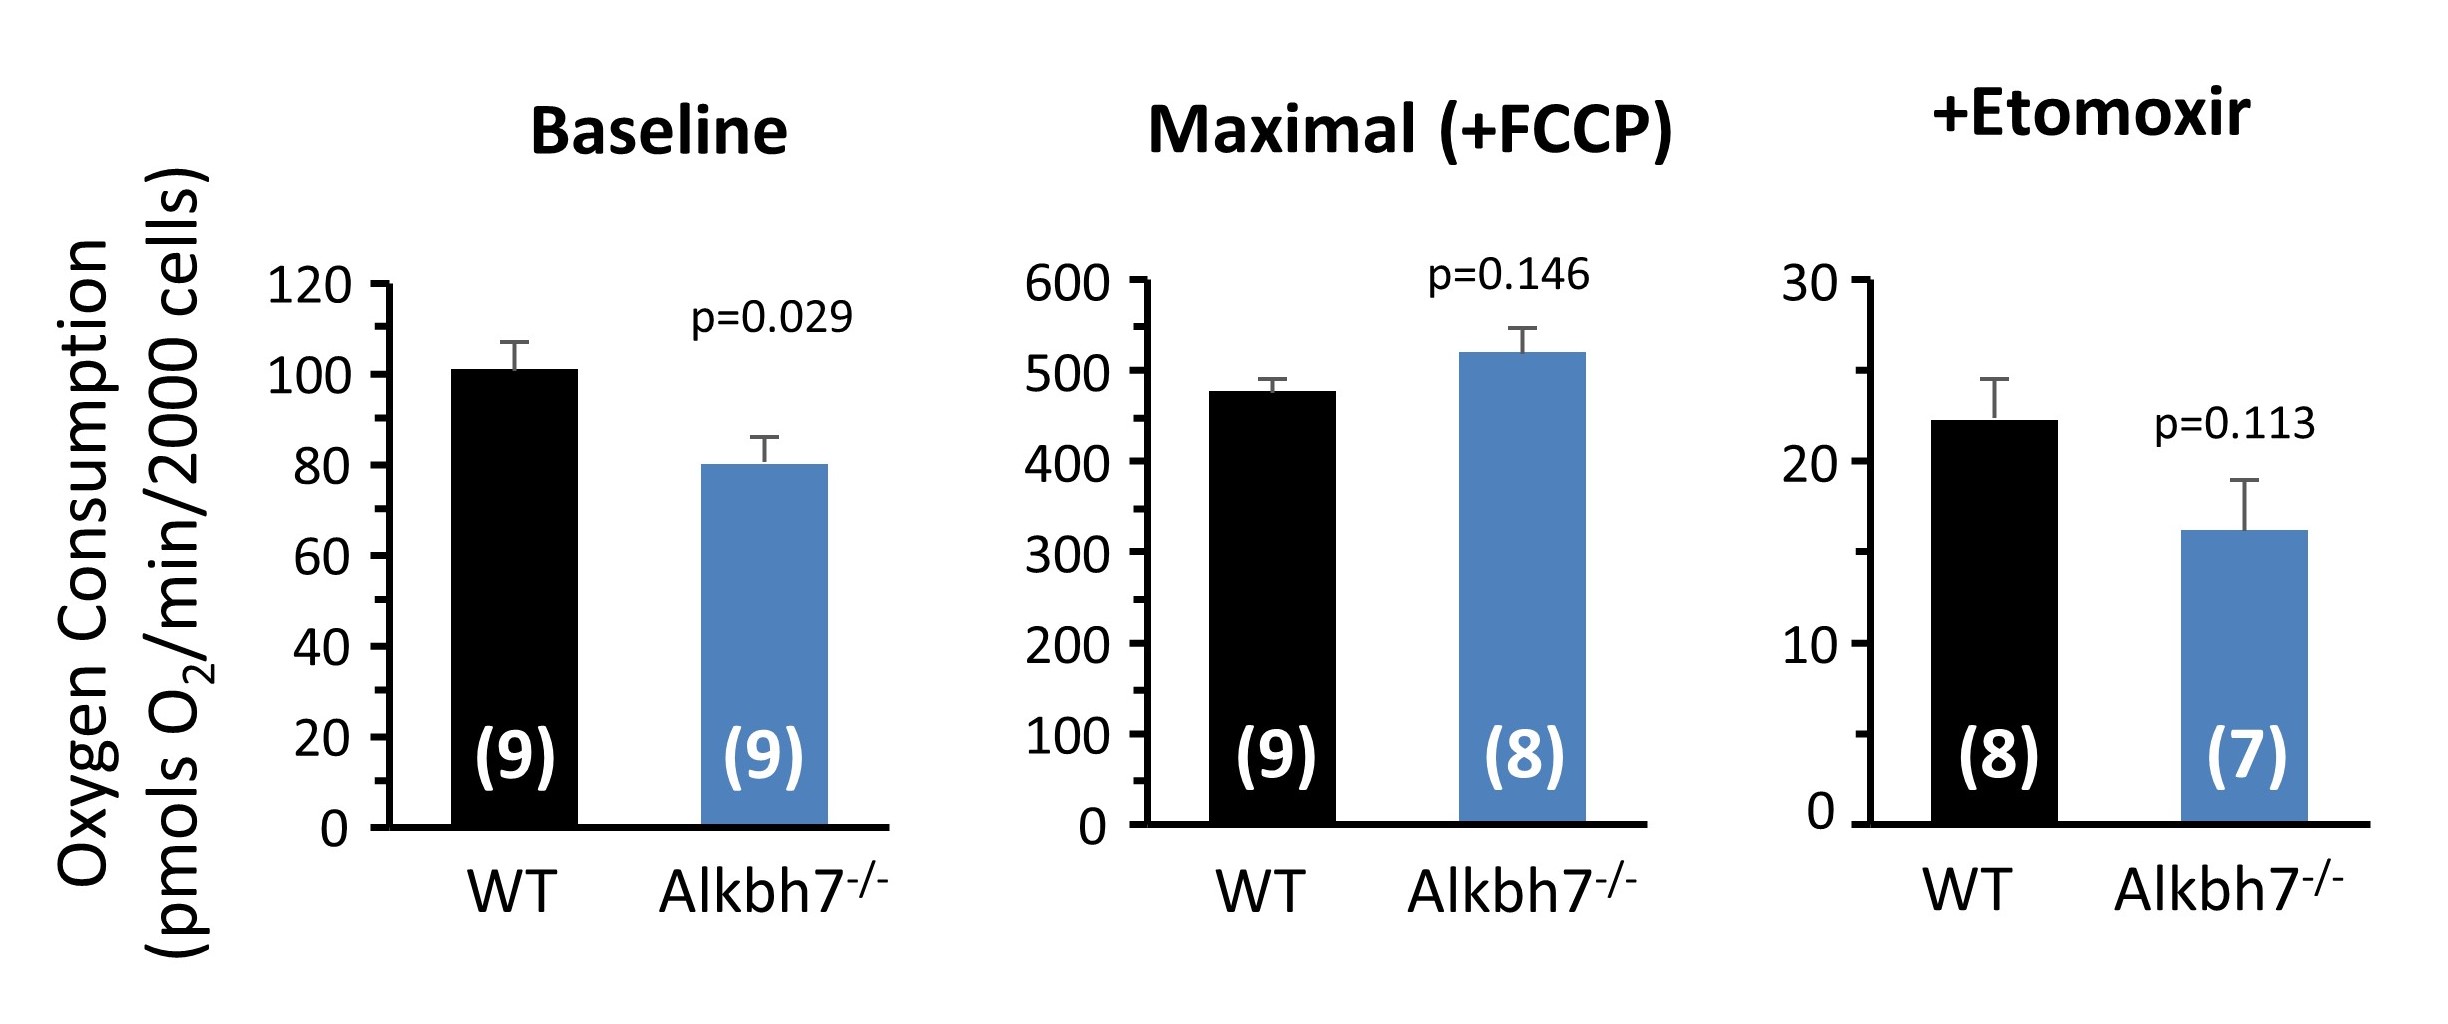

Supplement: supp [file elife-58573-supp-v1.zip › elife_poa_e58573_Figure_1_figure_supplement_2.jpg]

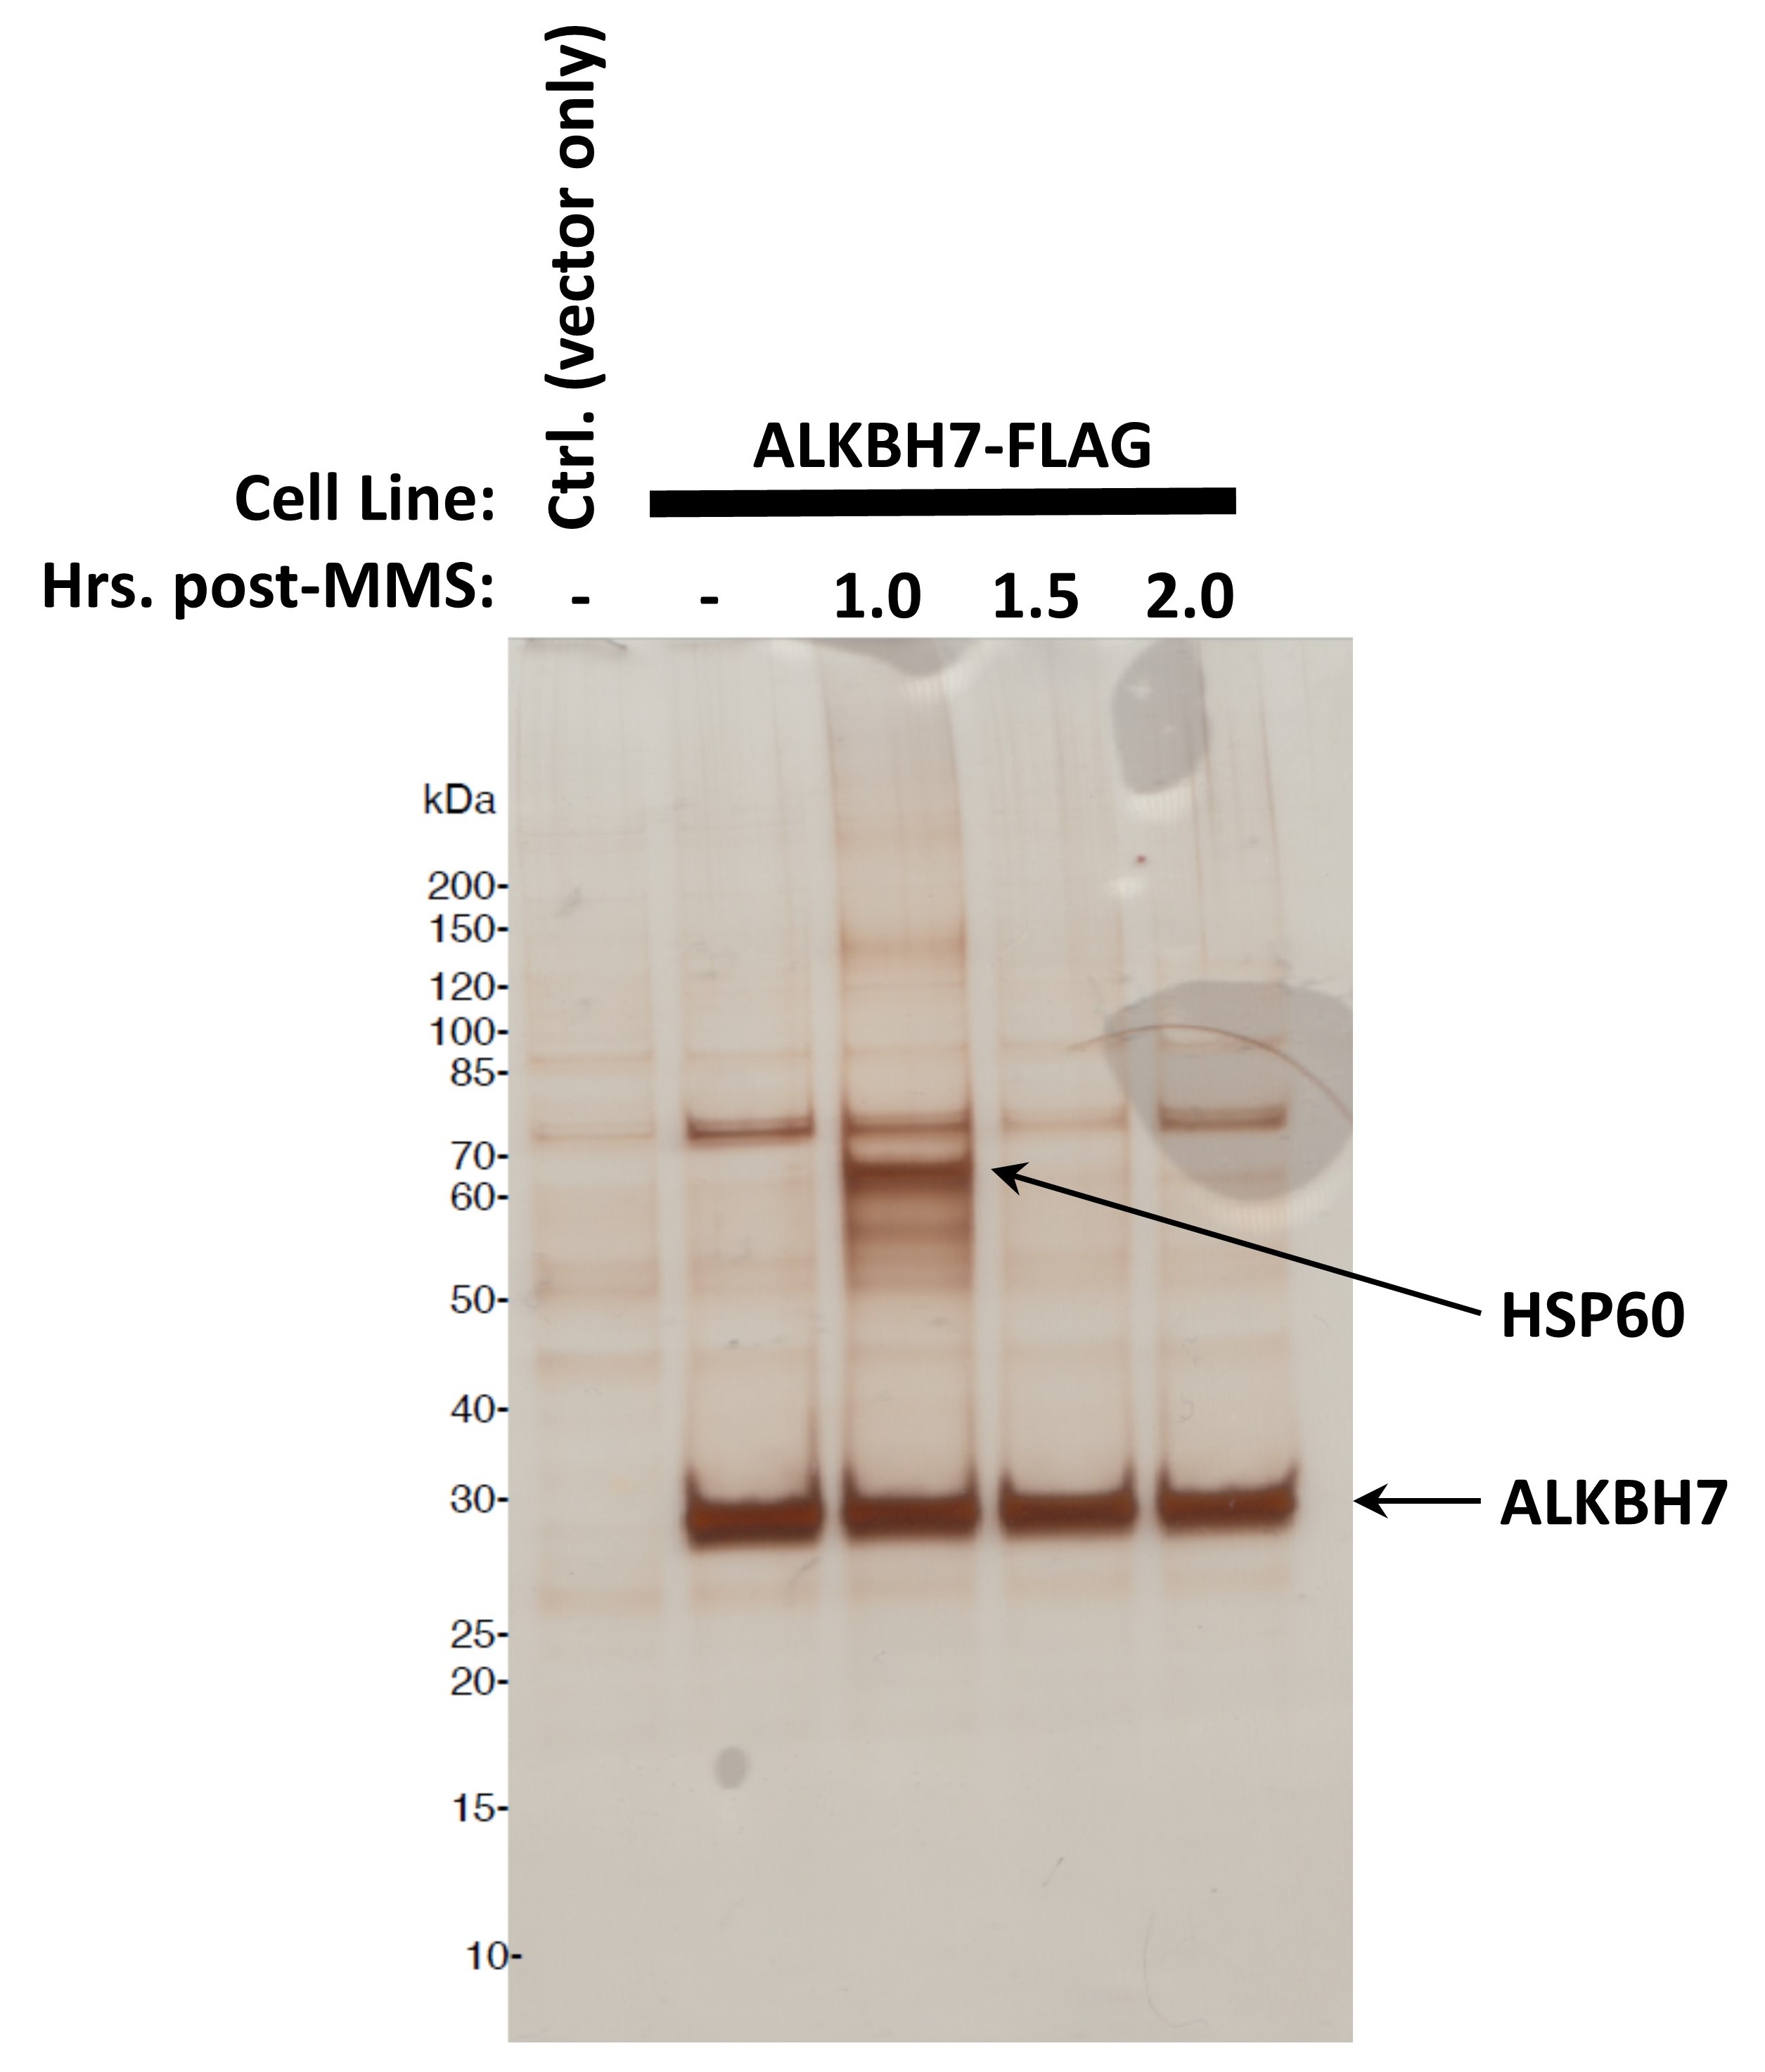

Supplement: supp [file elife-58573-supp-v1.zip › elife_poa_e58573_Figure_2_figure_supplement_1.jpg]

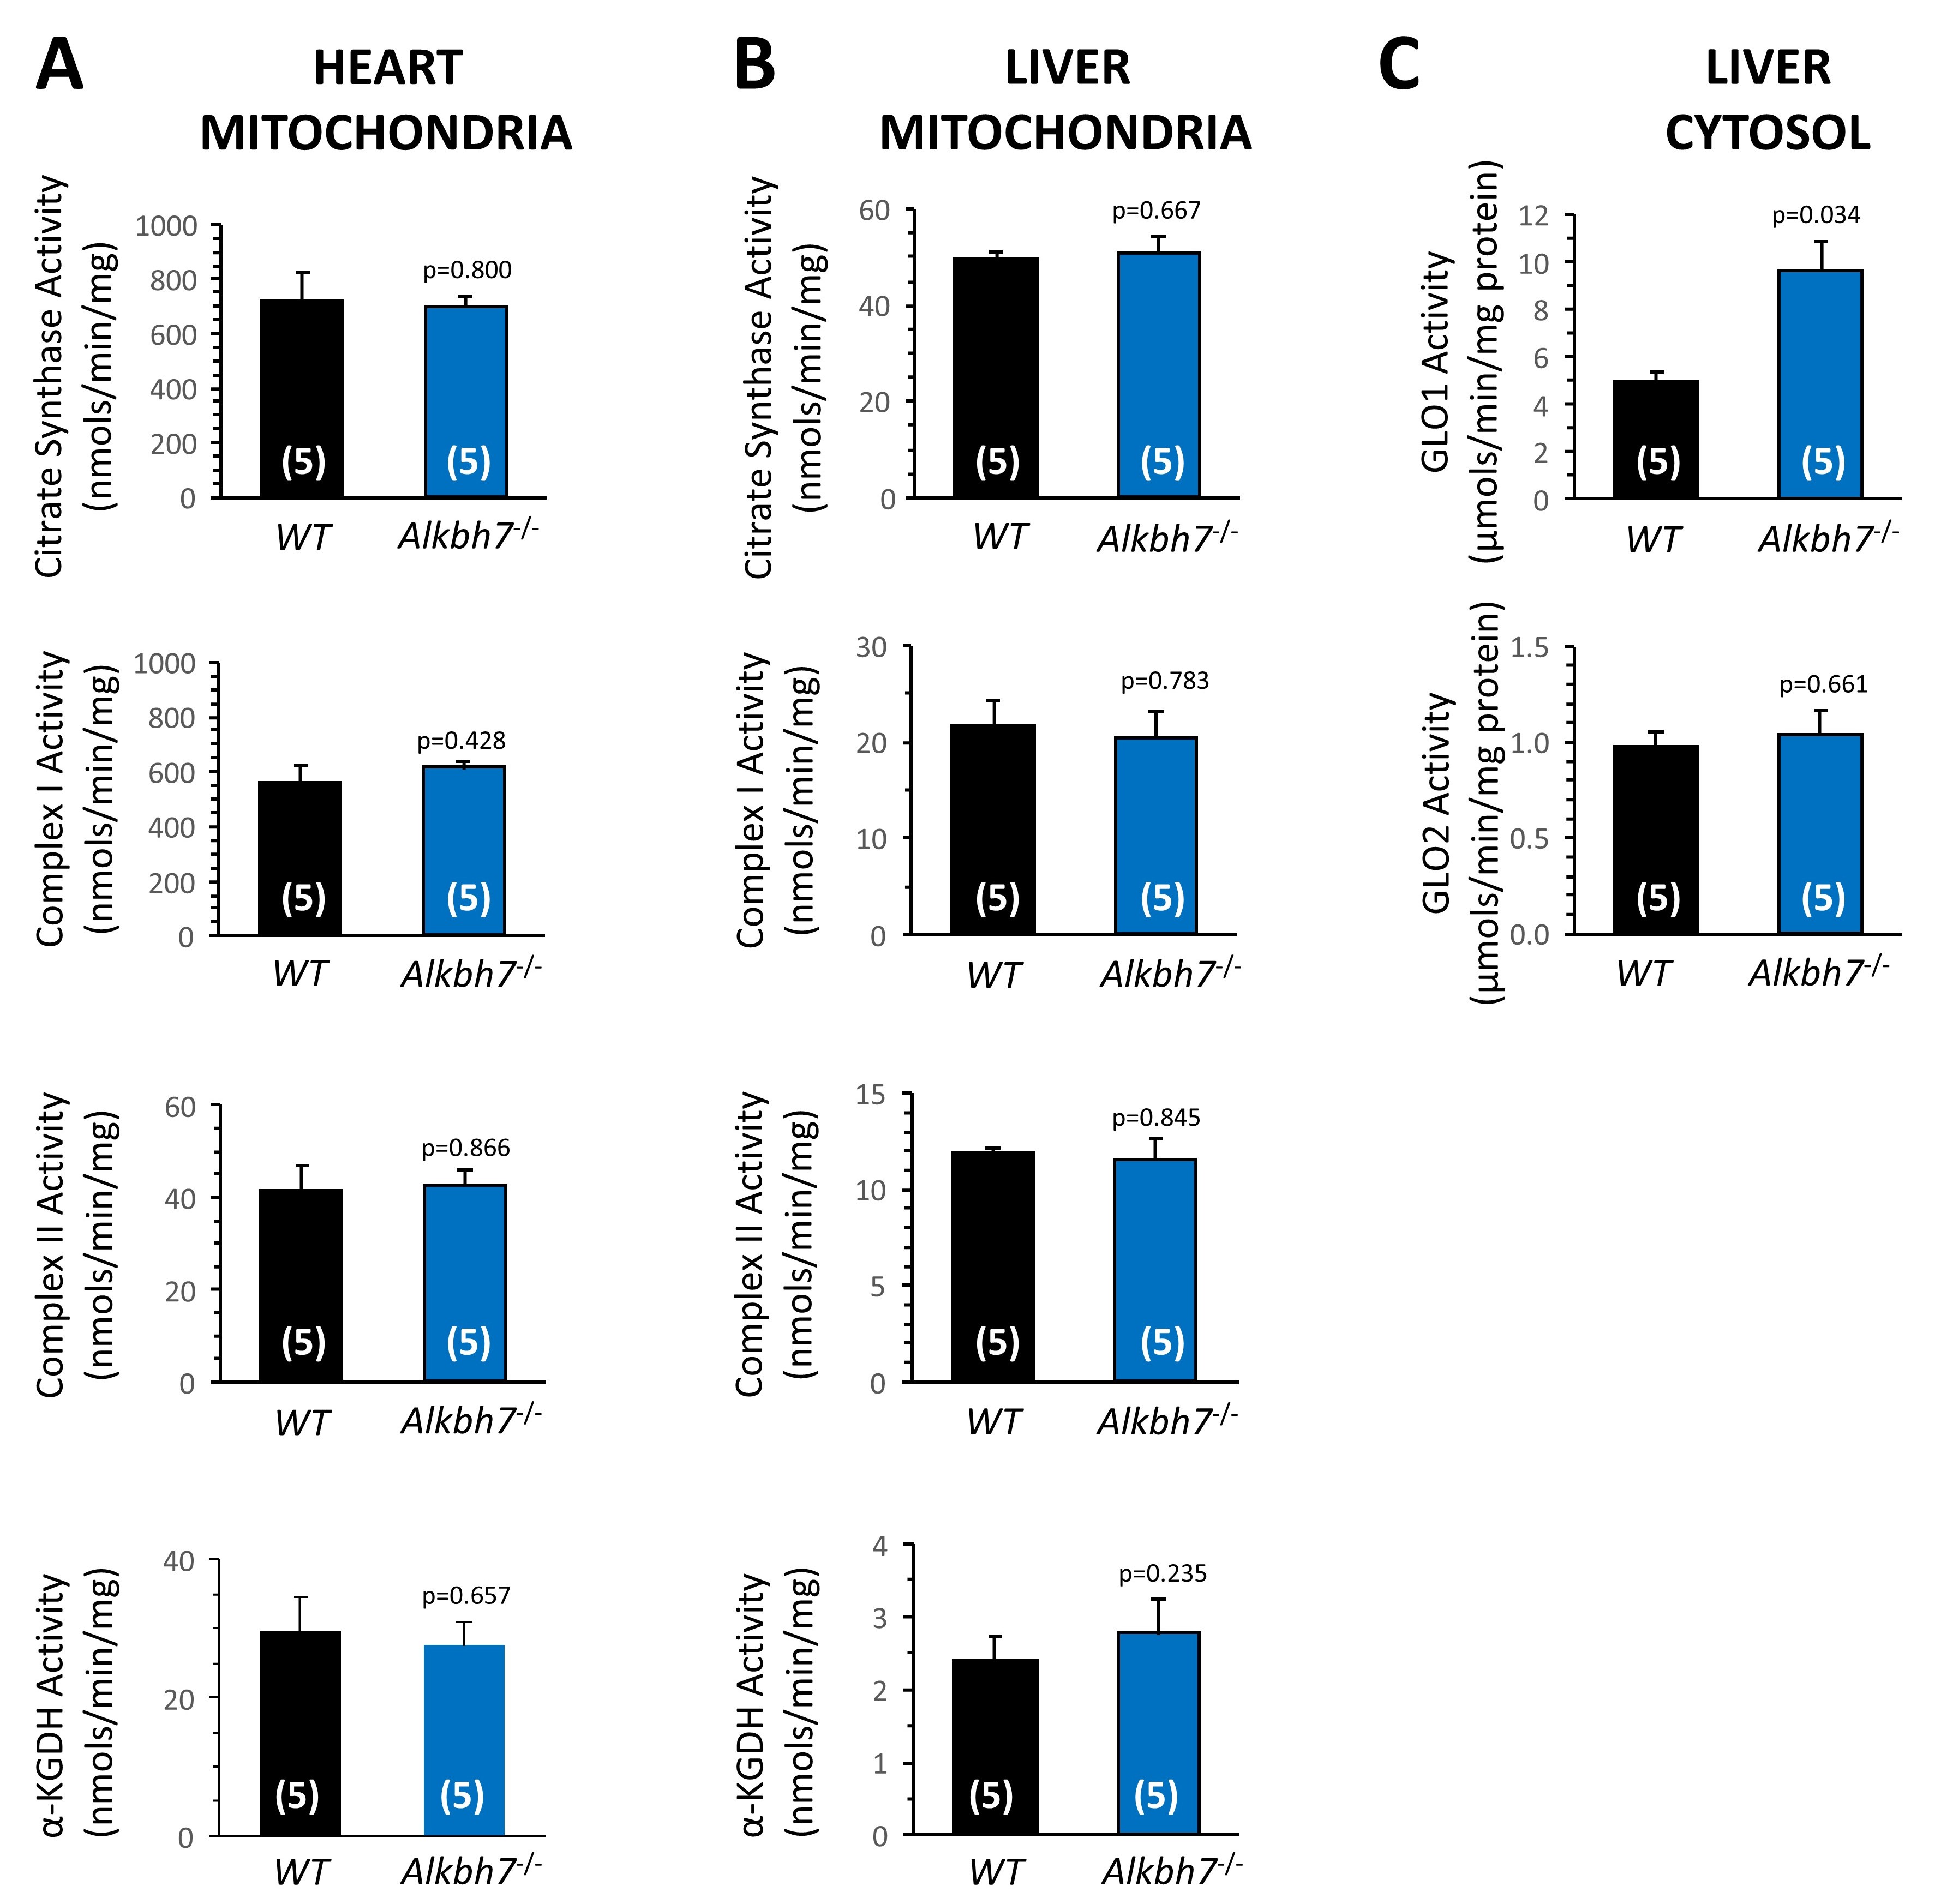

Supplement: supp [file elife-58573-supp-v1.zip › elife_poa_e58573_Figure_2_figure_supplement_2.jpg]

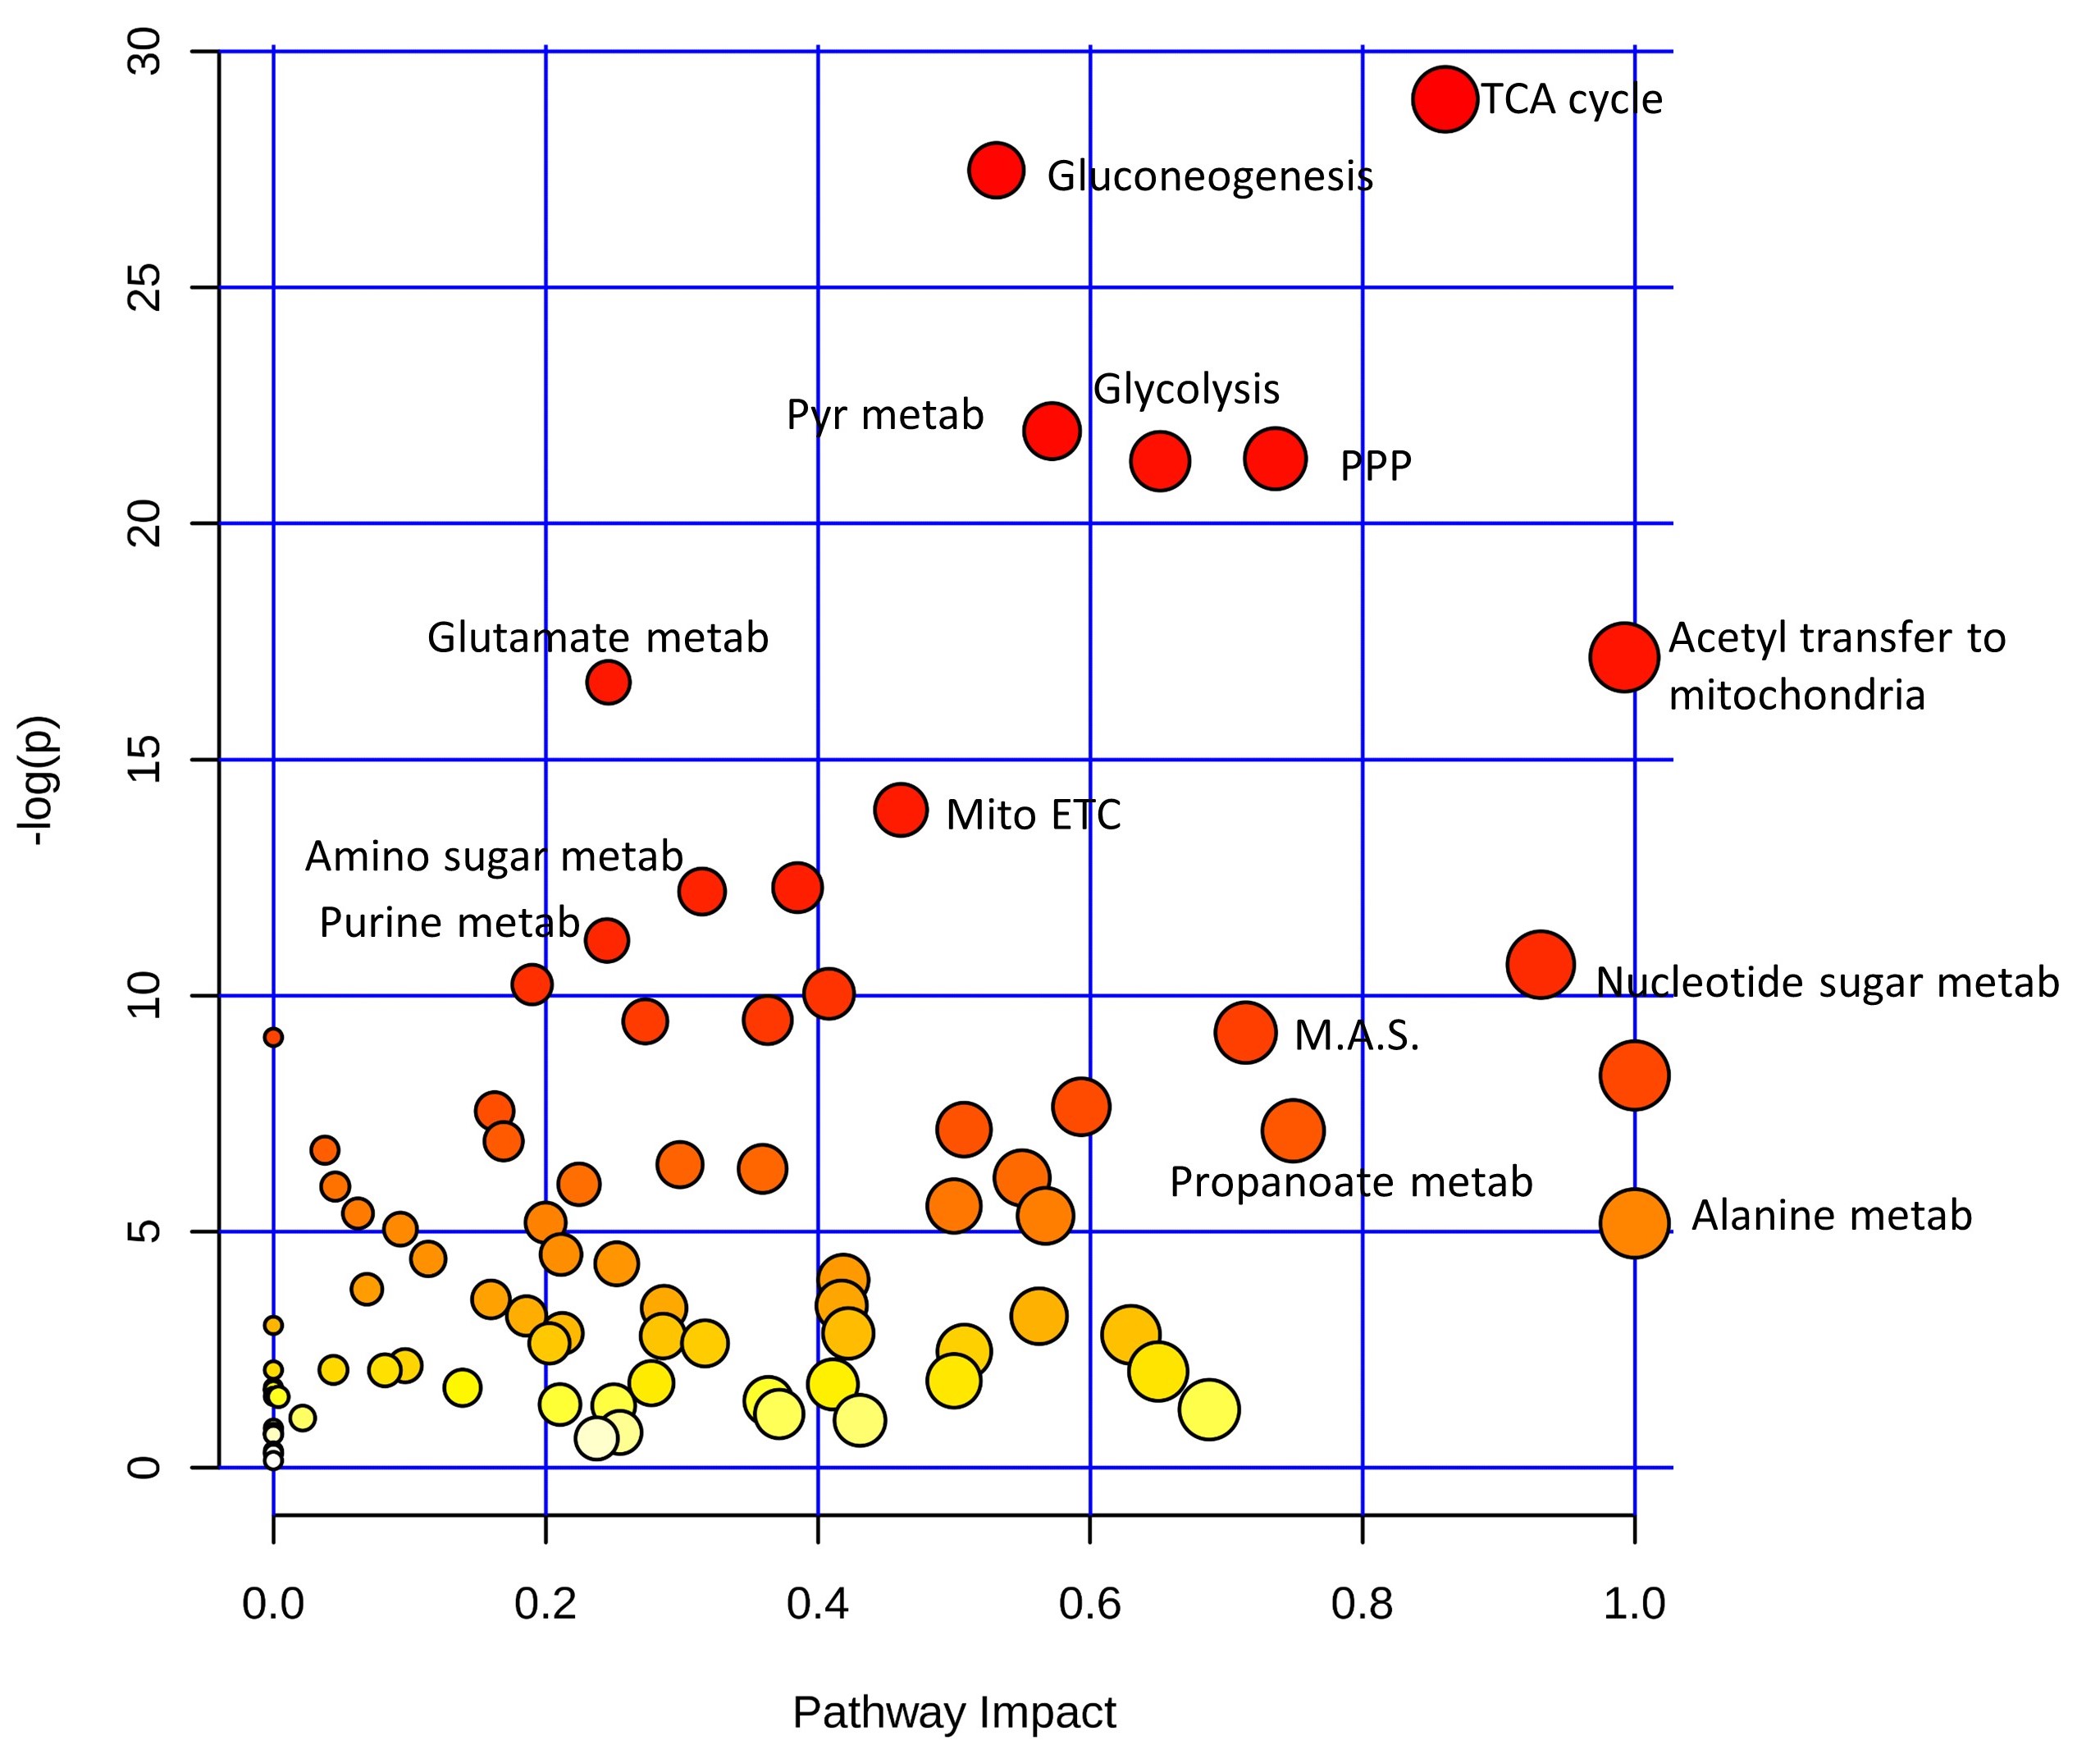

Supplement: supp [file elife-58573-supp-v1.zip › elife_poa_e58573_Figure_3_figure_supplement_3.jpg]

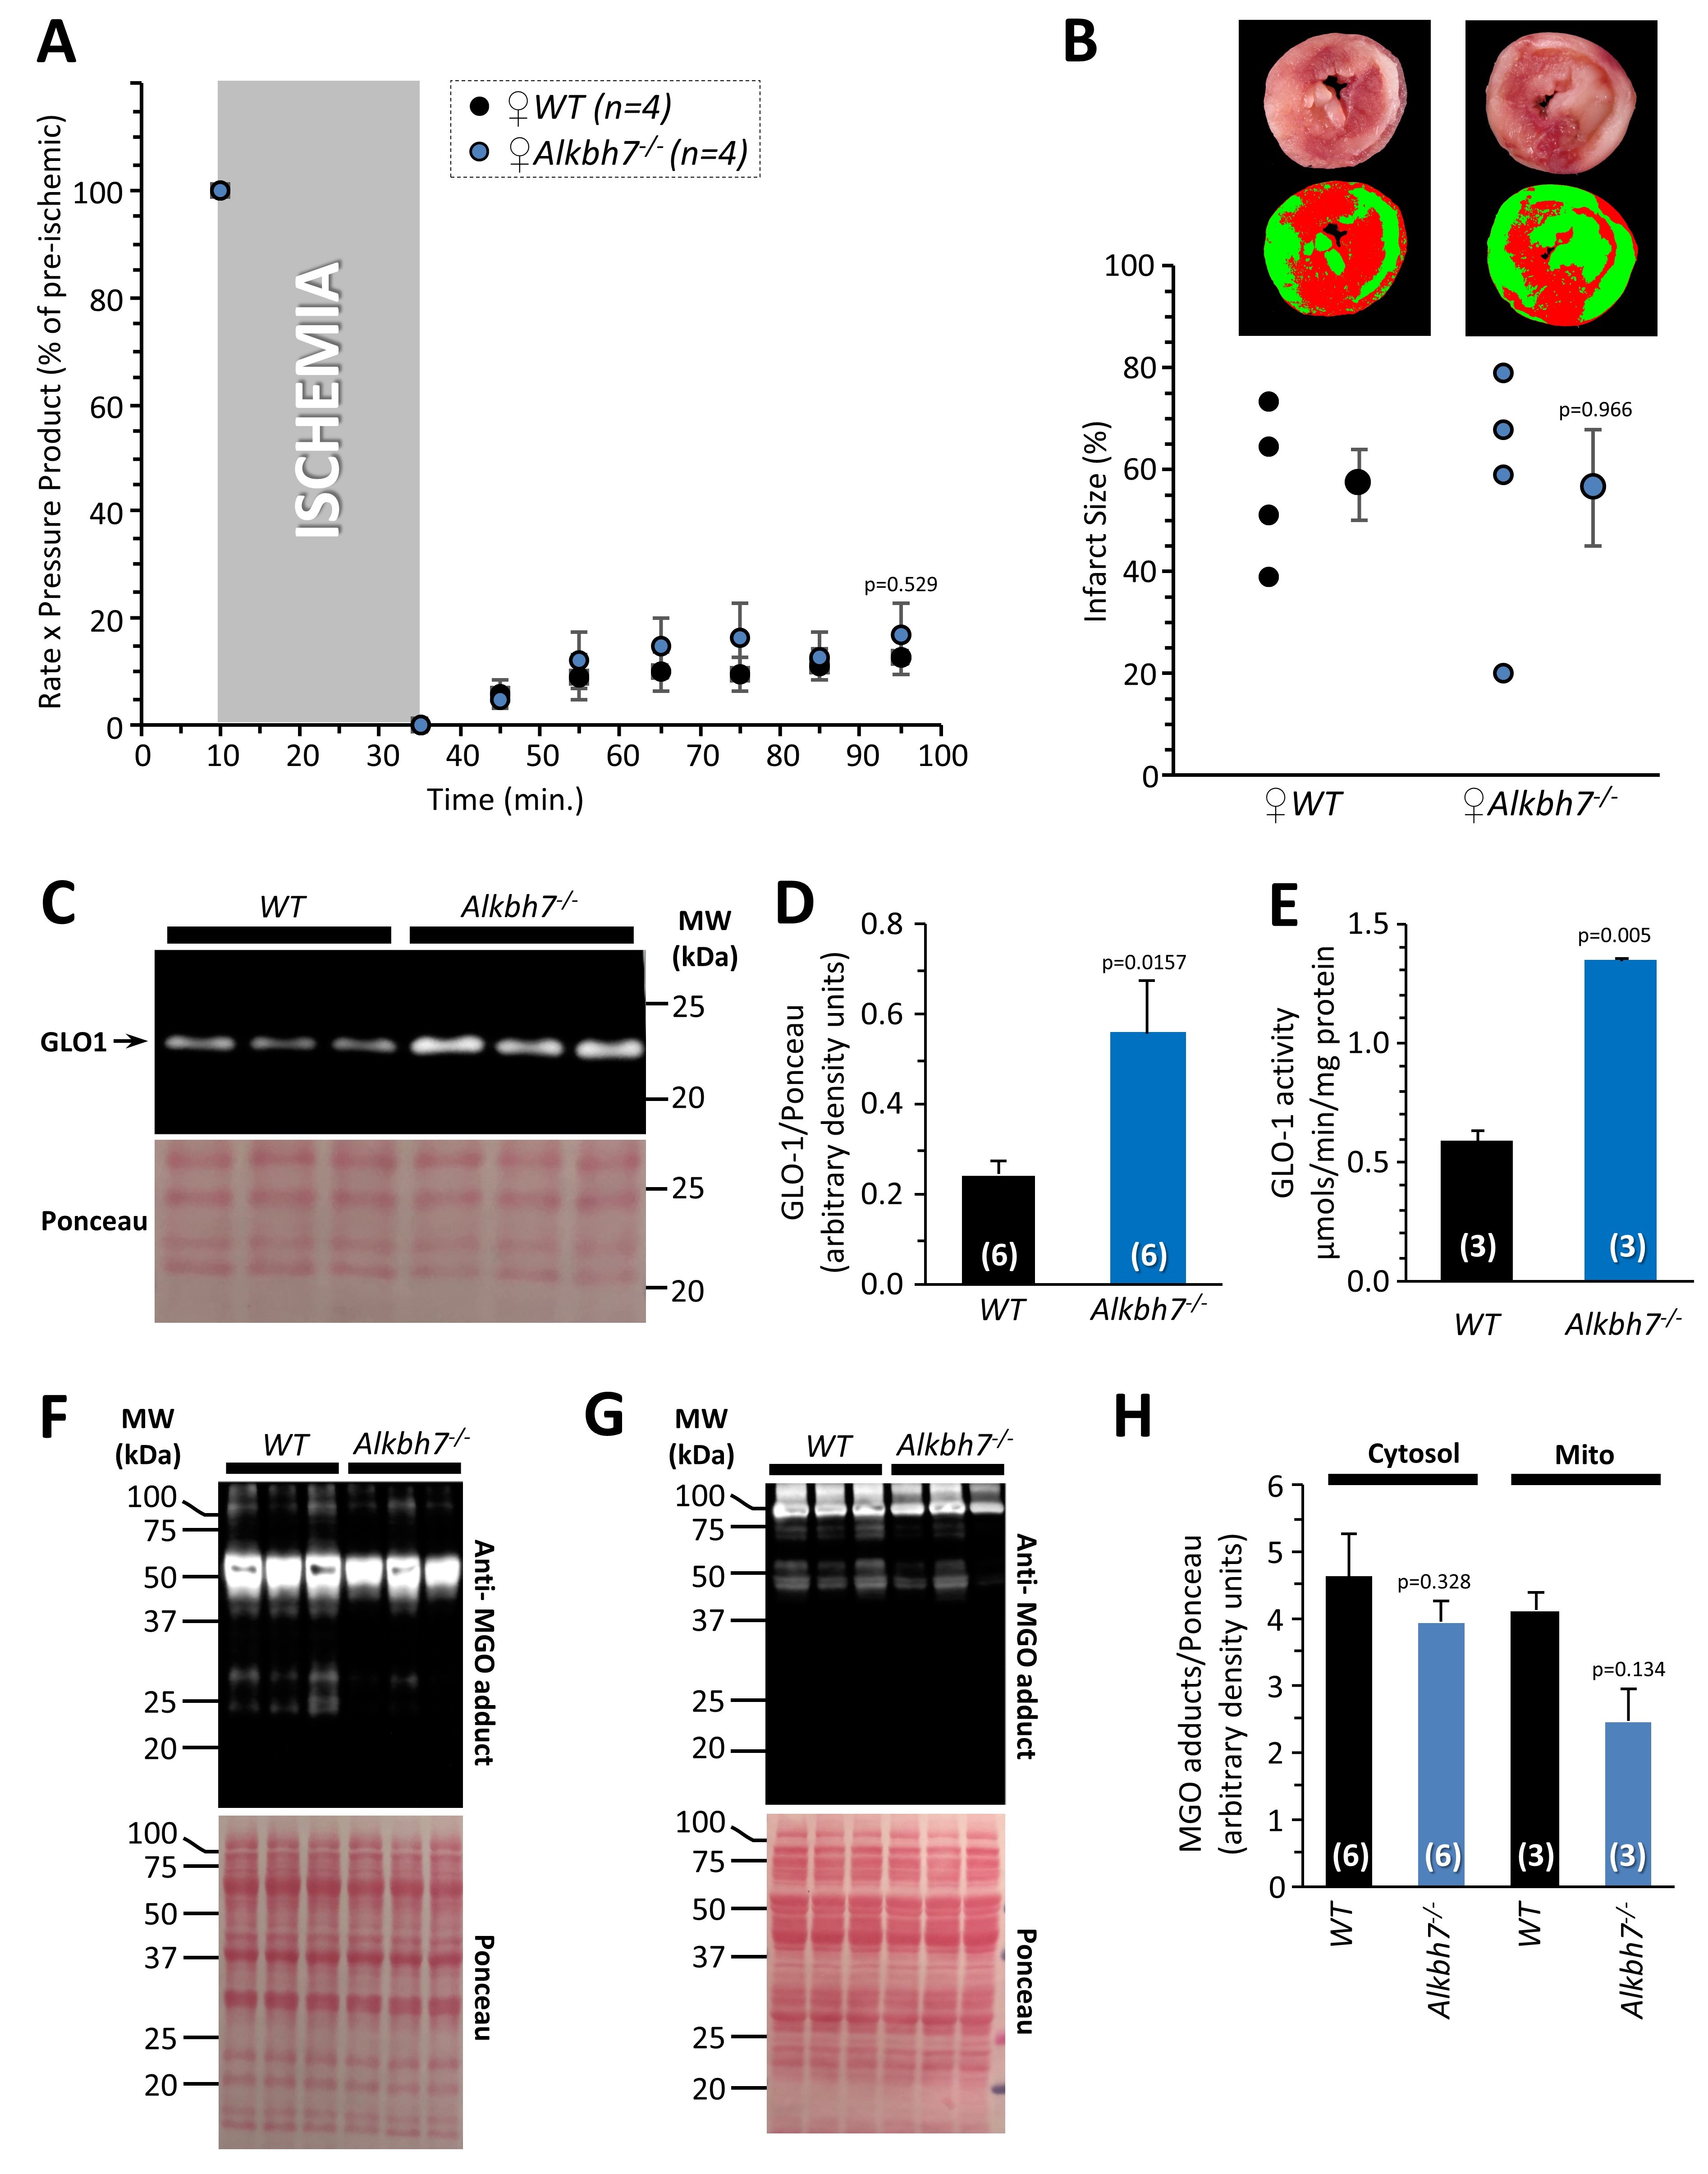

Supplement: supp [file elife-58573-supp-v1.zip › elife_poa_e58573_Figure_4_figure_supplement_1.jpg]

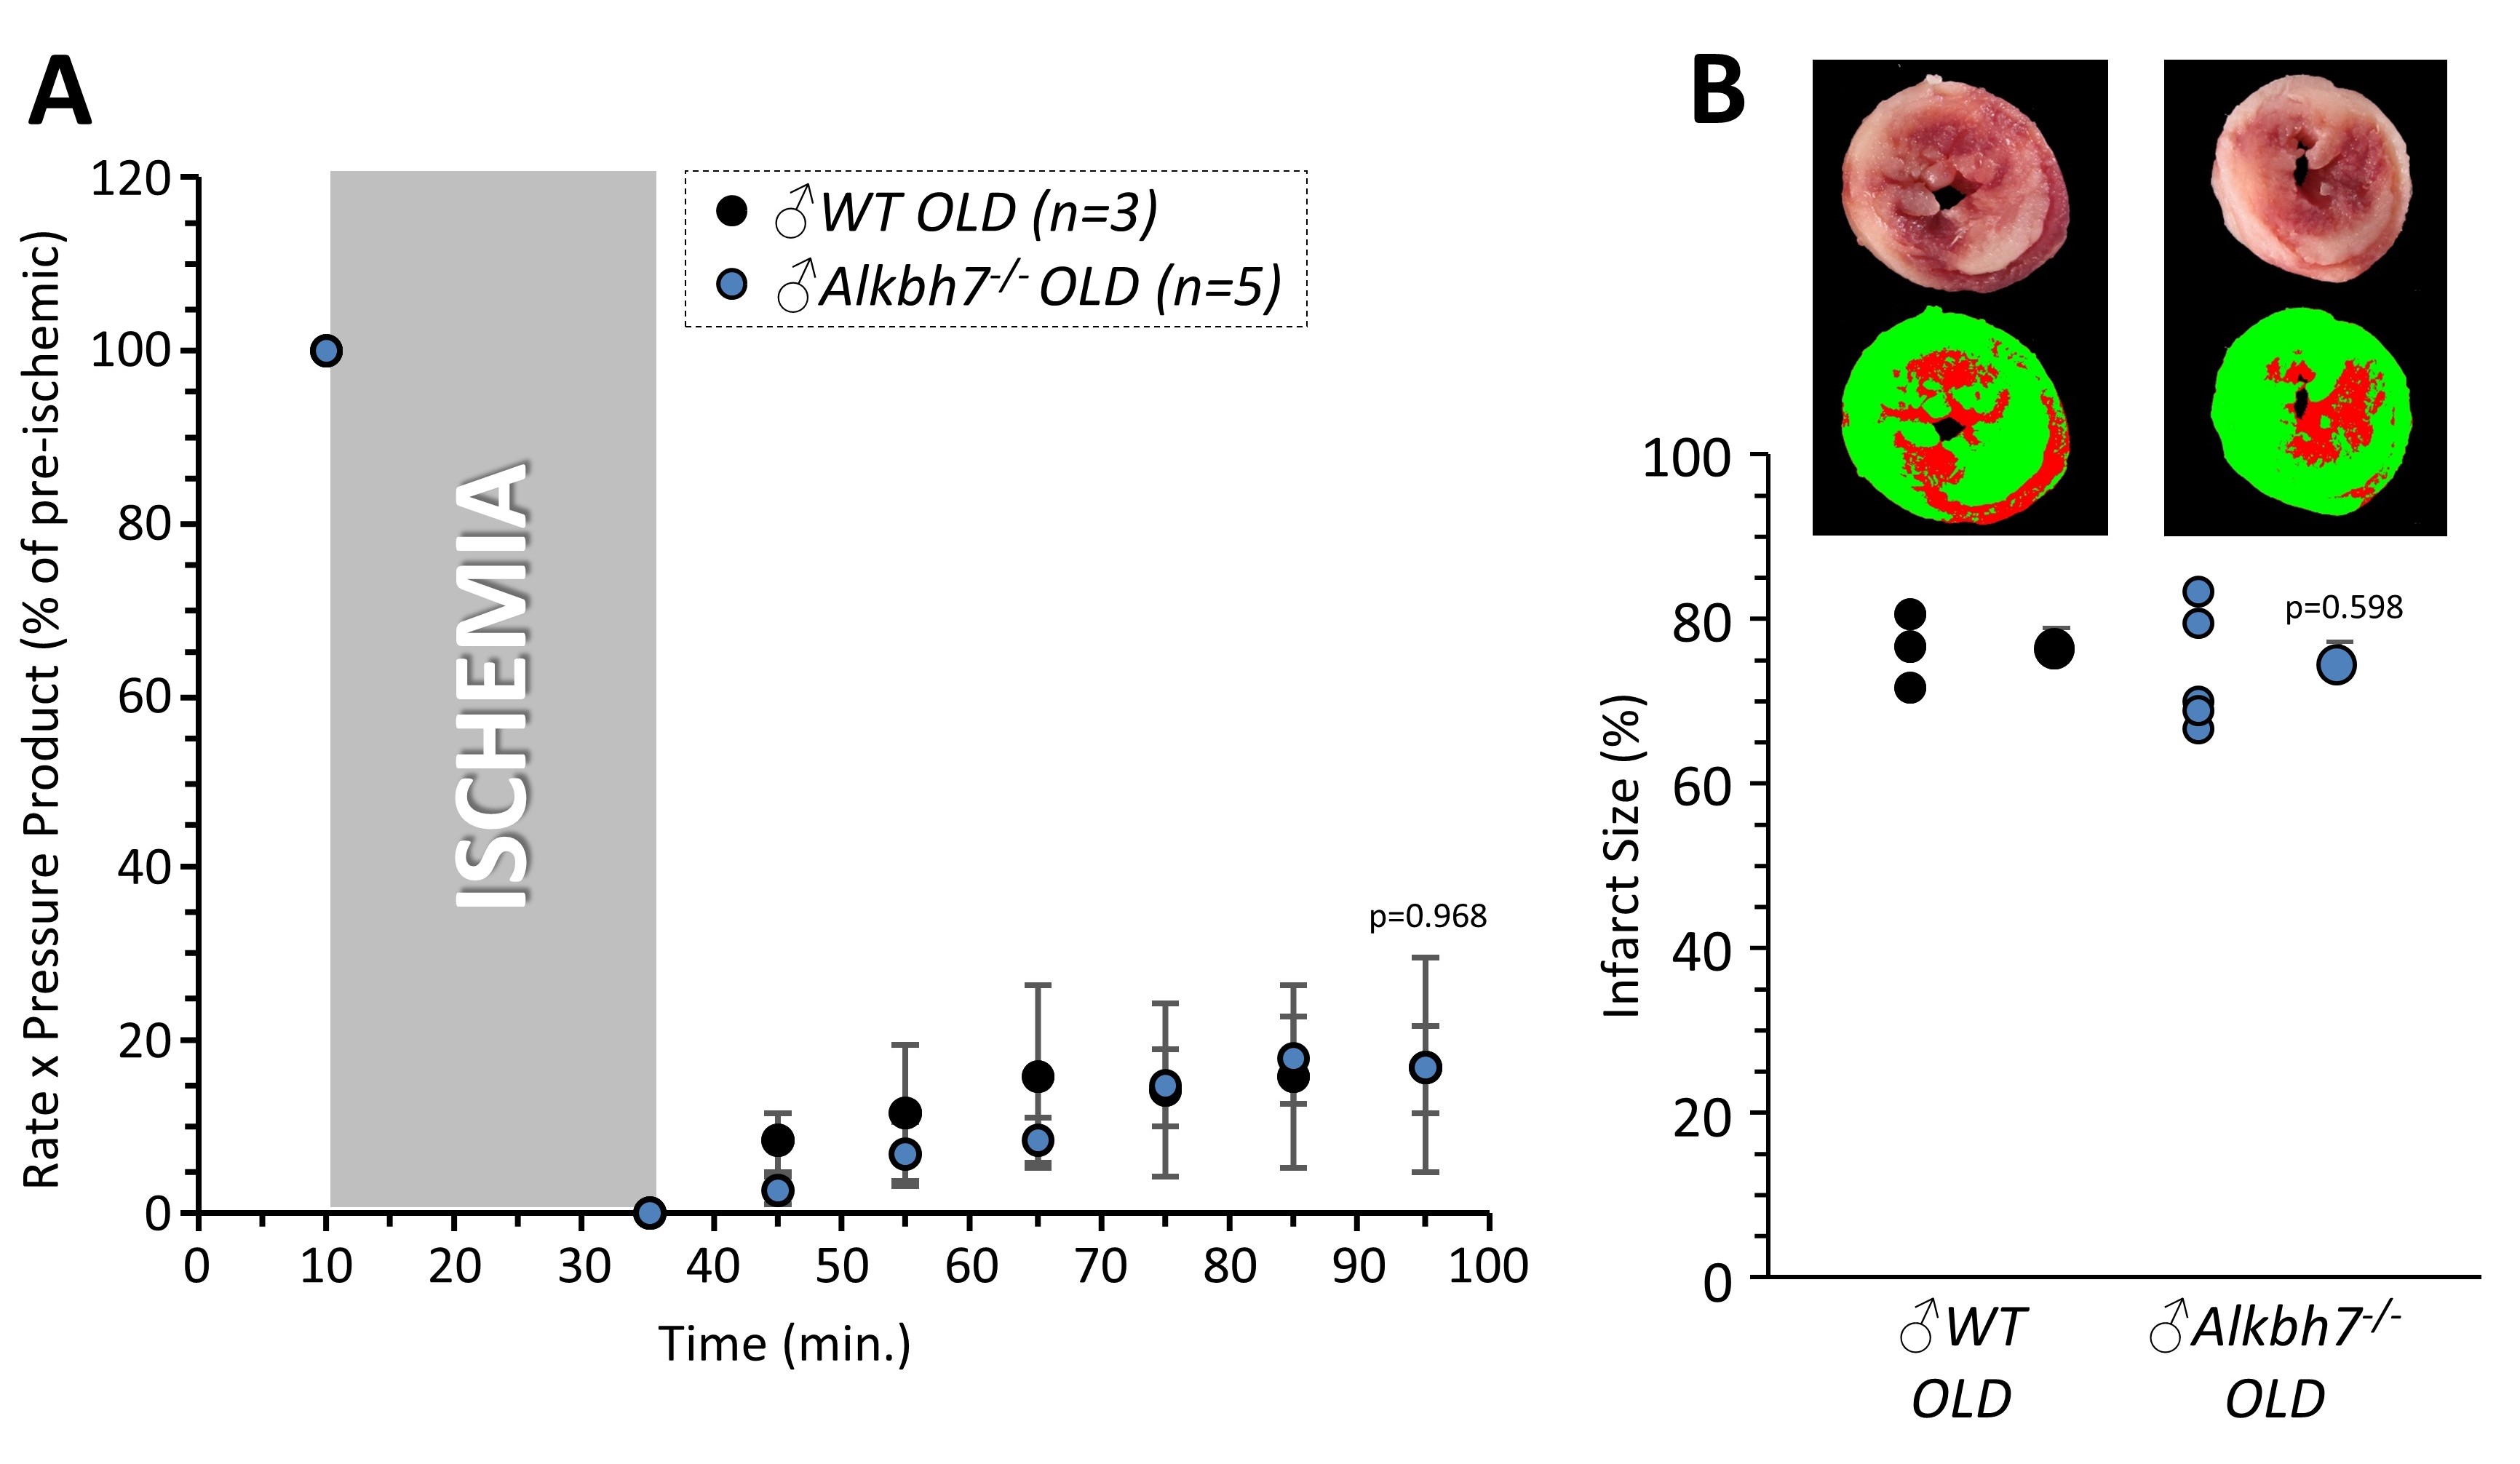

Supplement: supp [file elife-58573-supp-v1.zip › elife_poa_e58573_Figure_4_figure_supplement_2.jpg]

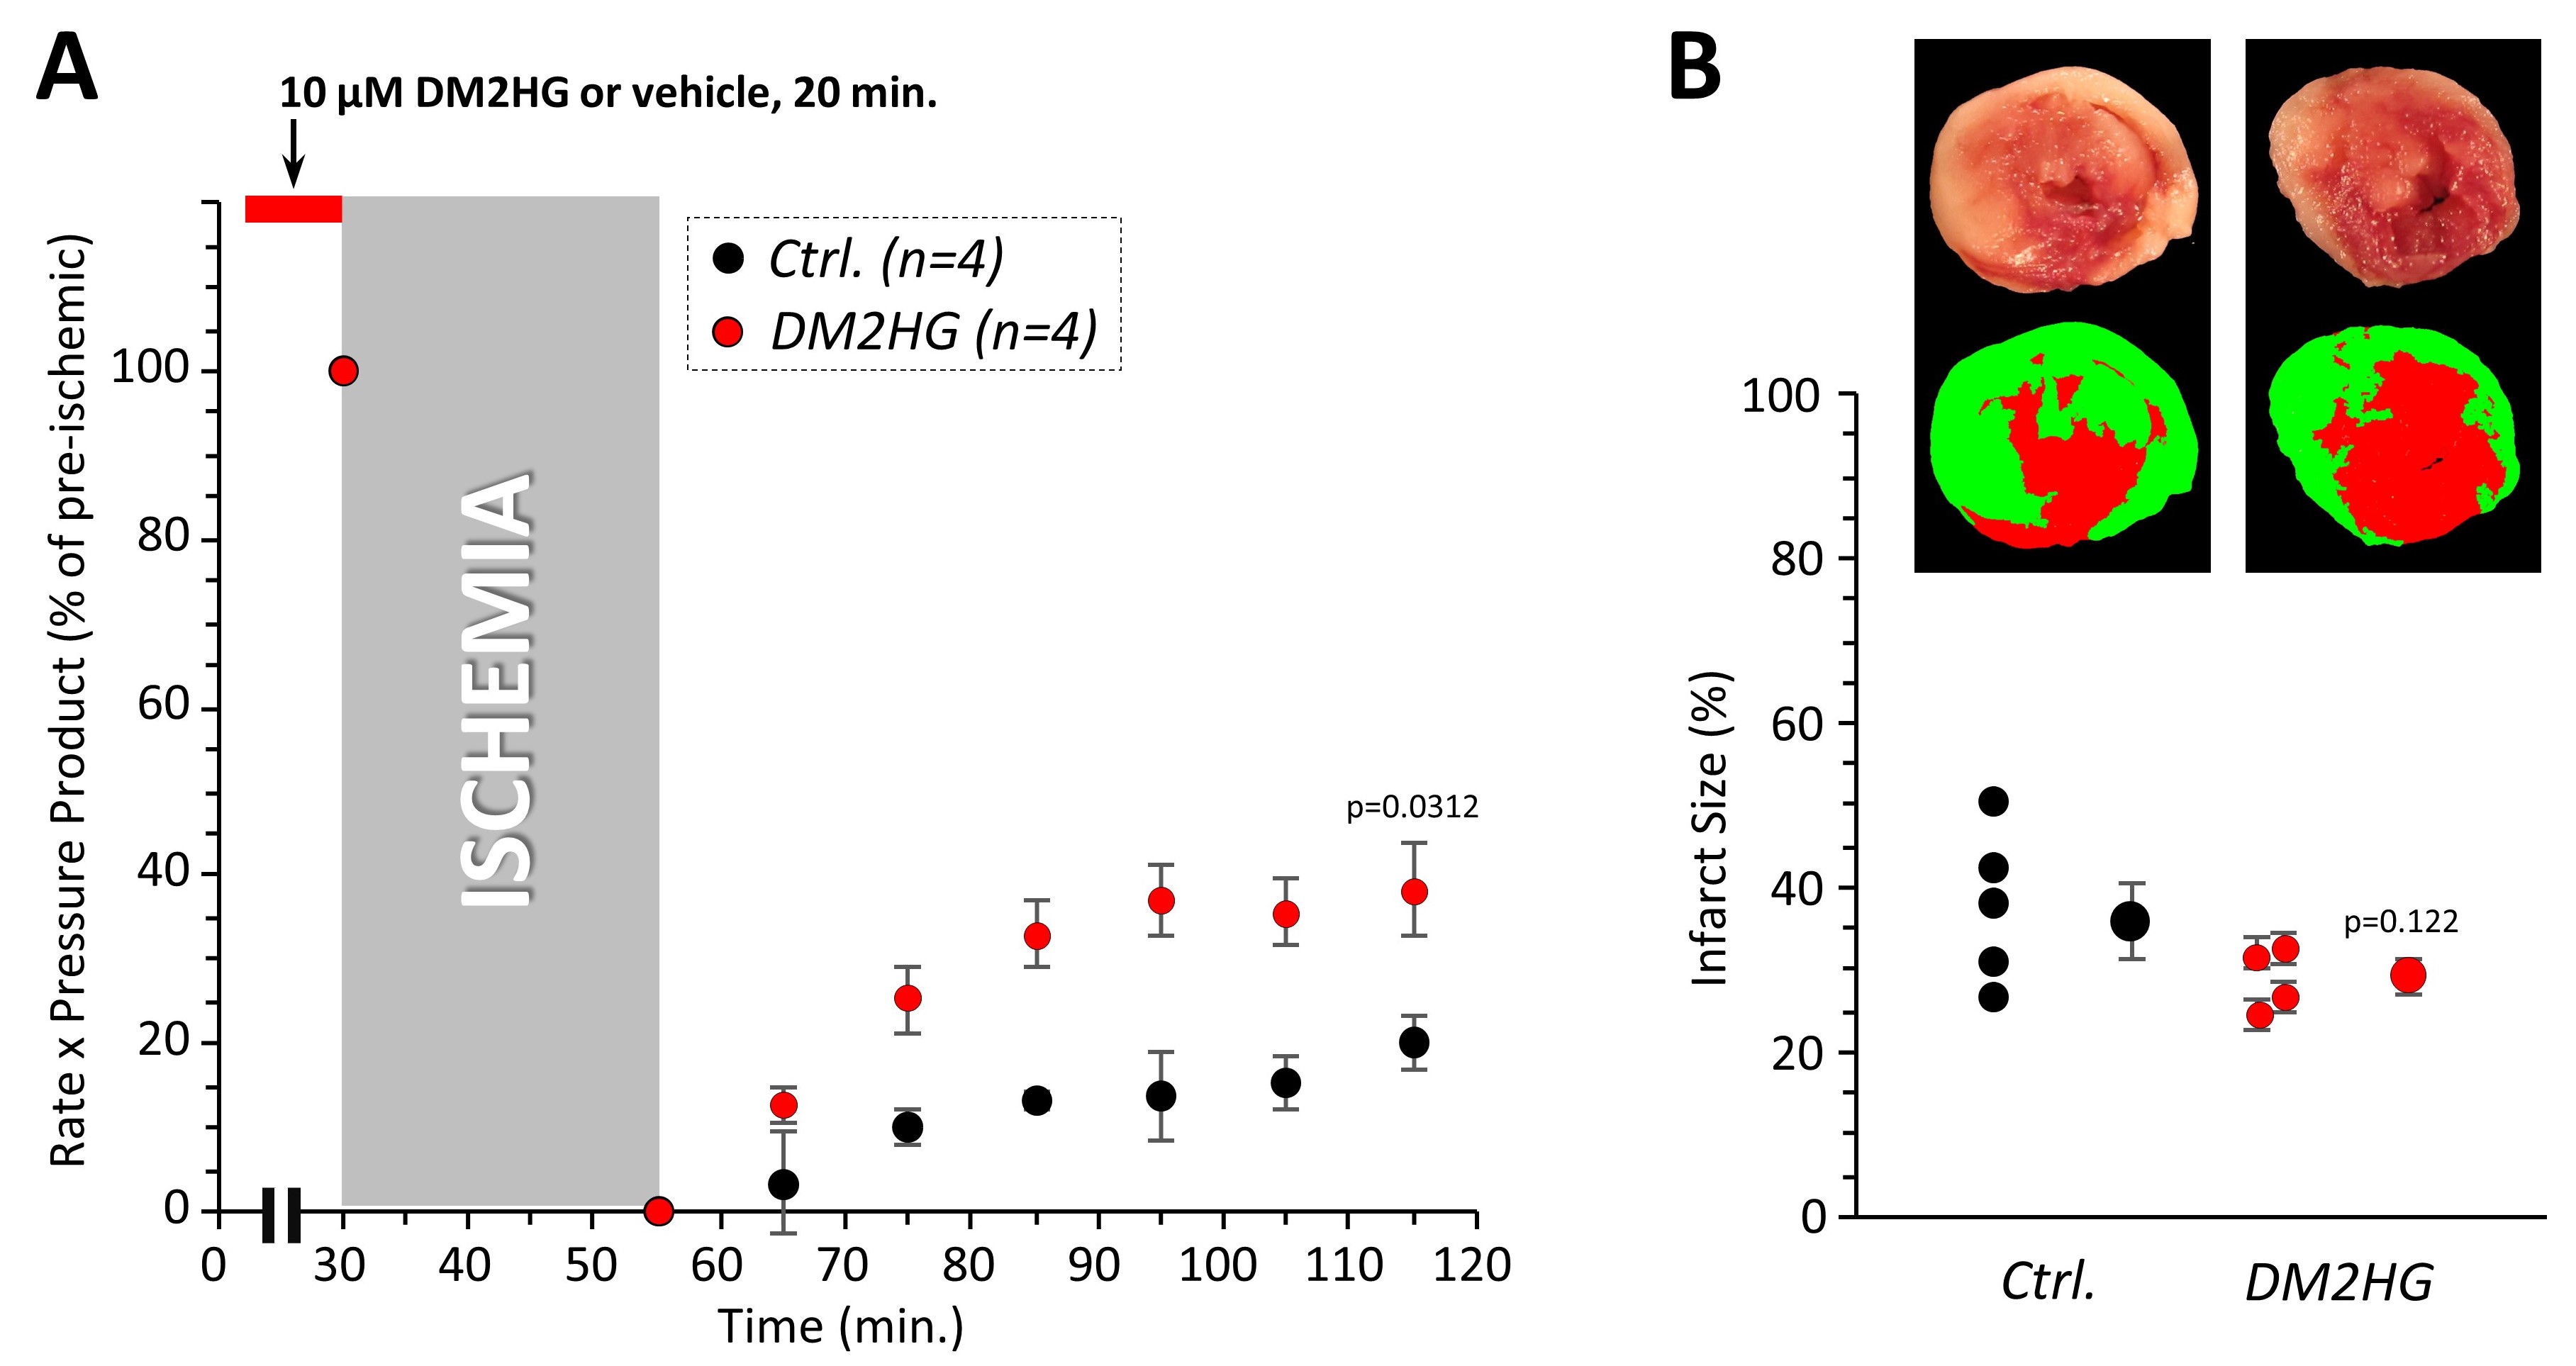

Supplement: supp [file elife-58573-supp-v1.zip › elife_poa_e58573_Figure_5_figure_supplement_1.jpg]

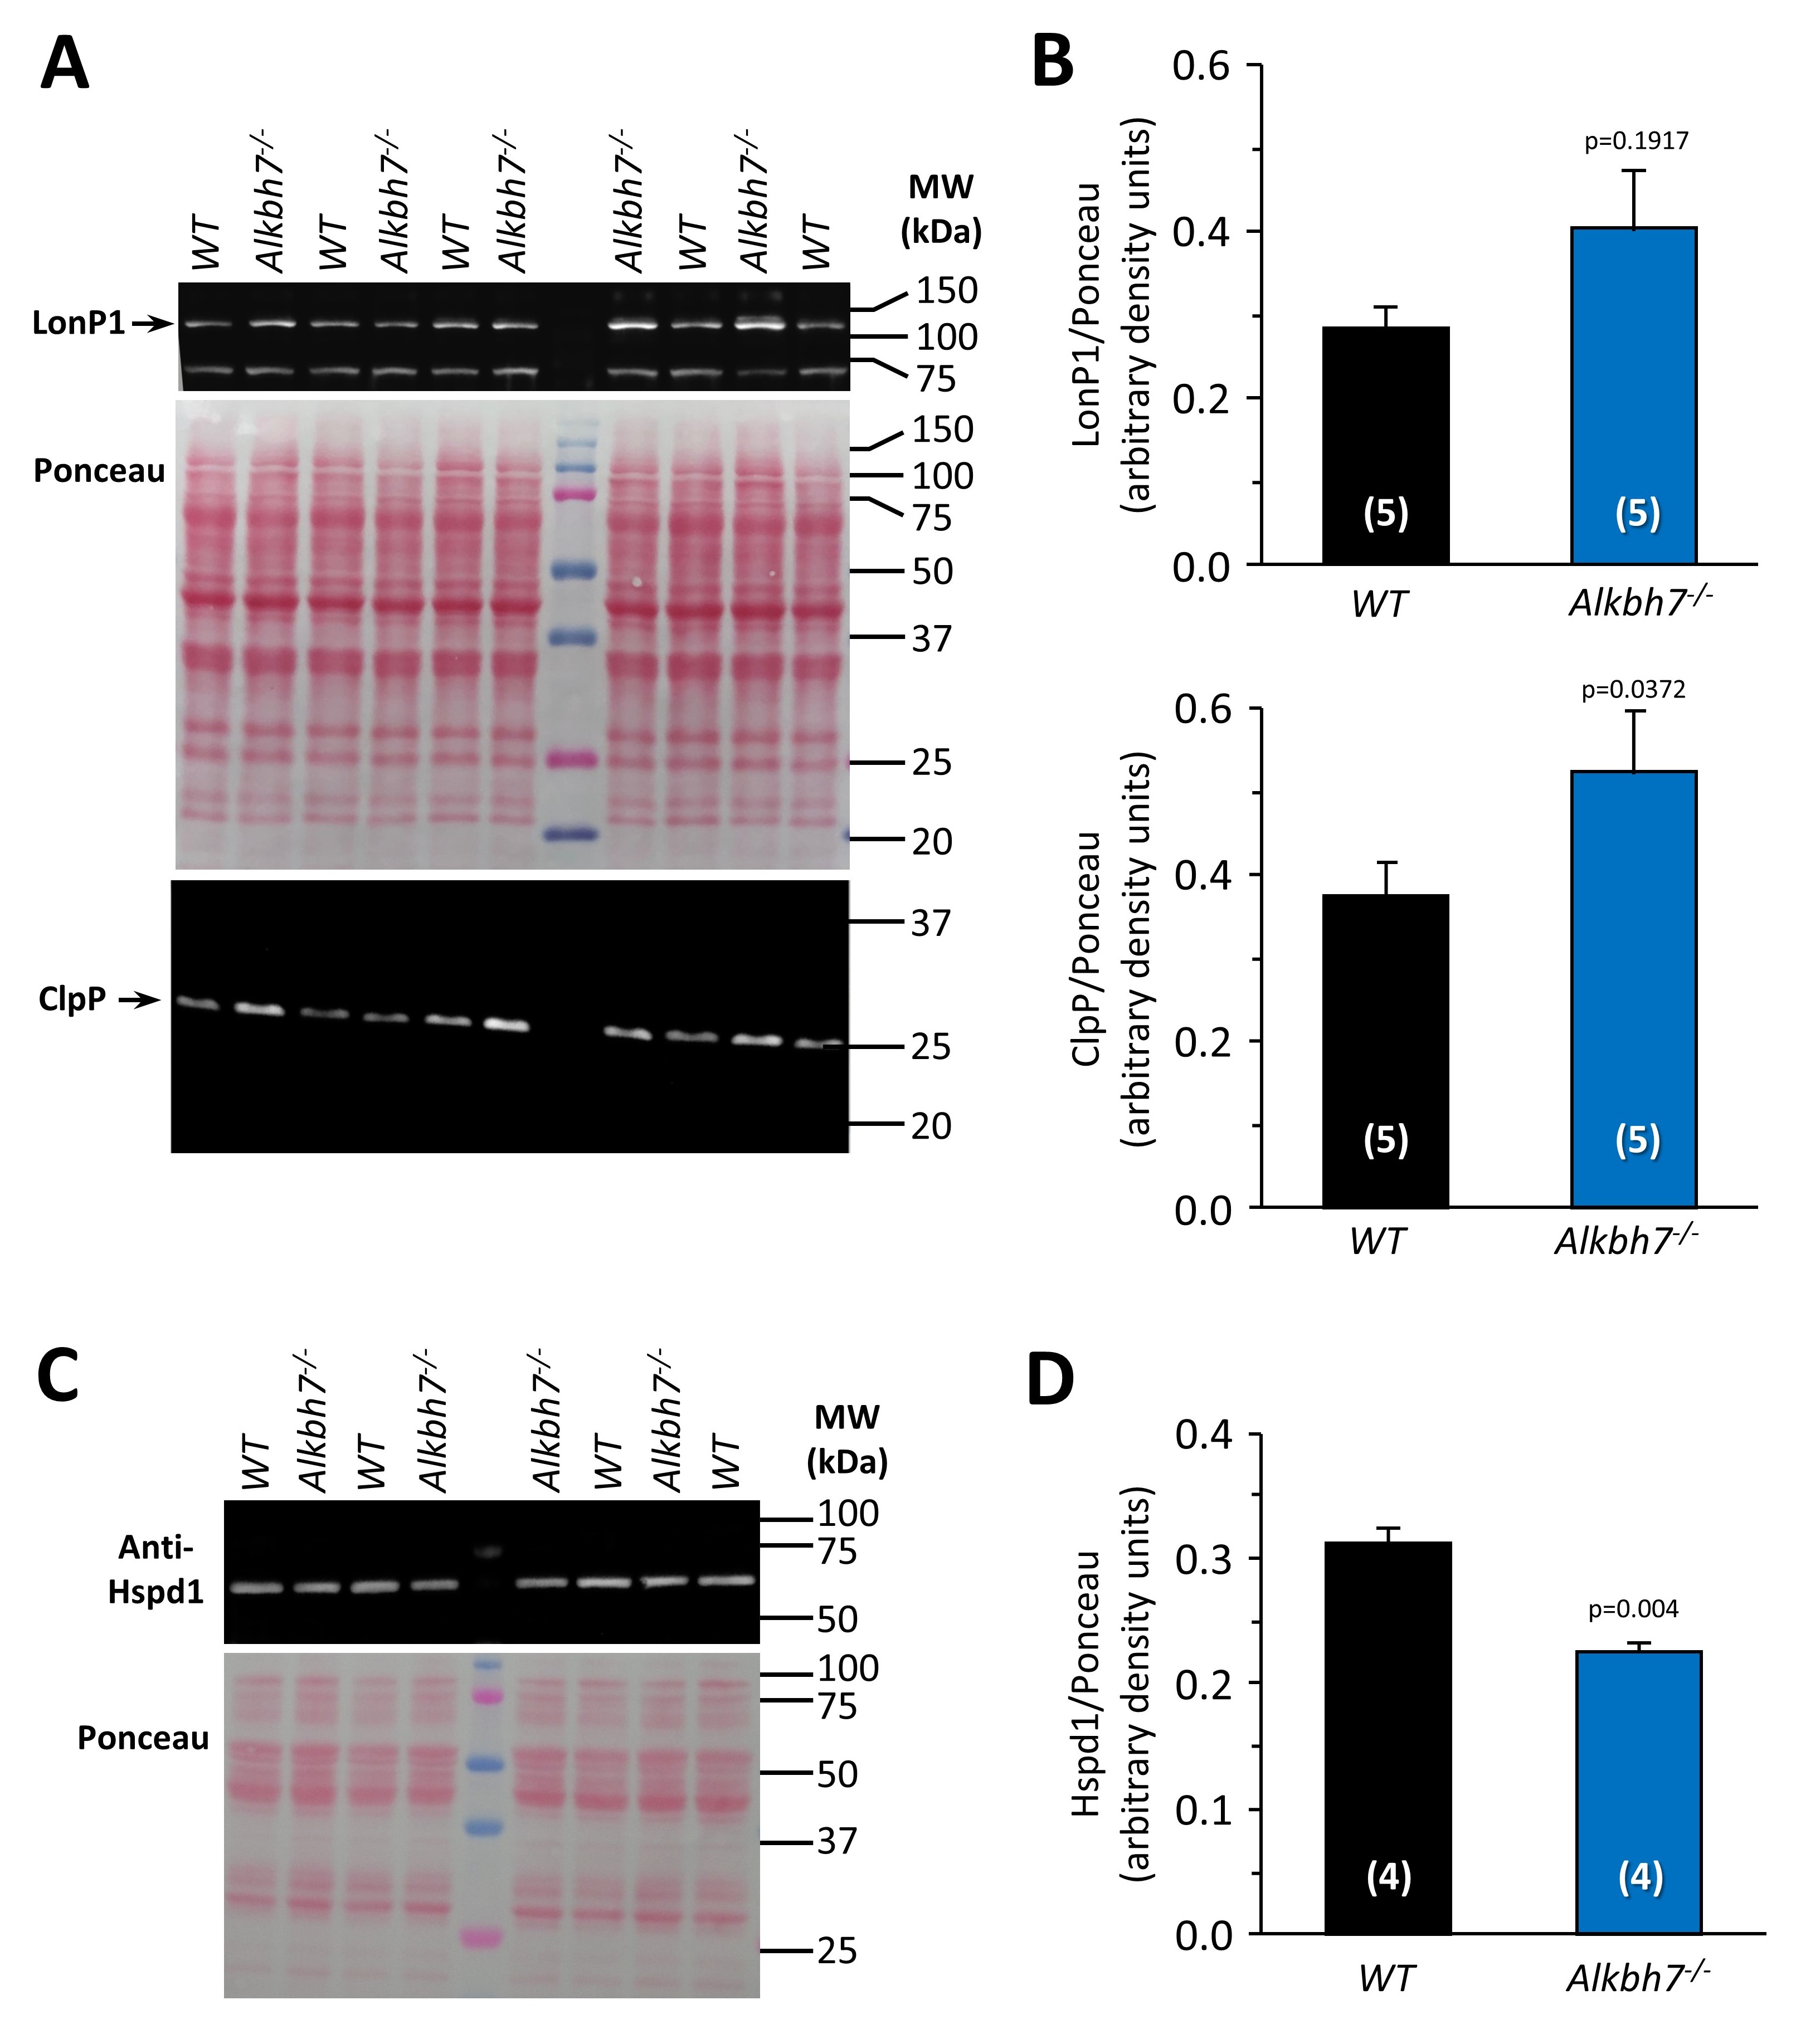

Supplement: supp [file elife-58573-supp-v1.zip › elife_poa_e58573_Figure_5_figure_supplement_2.jpg]

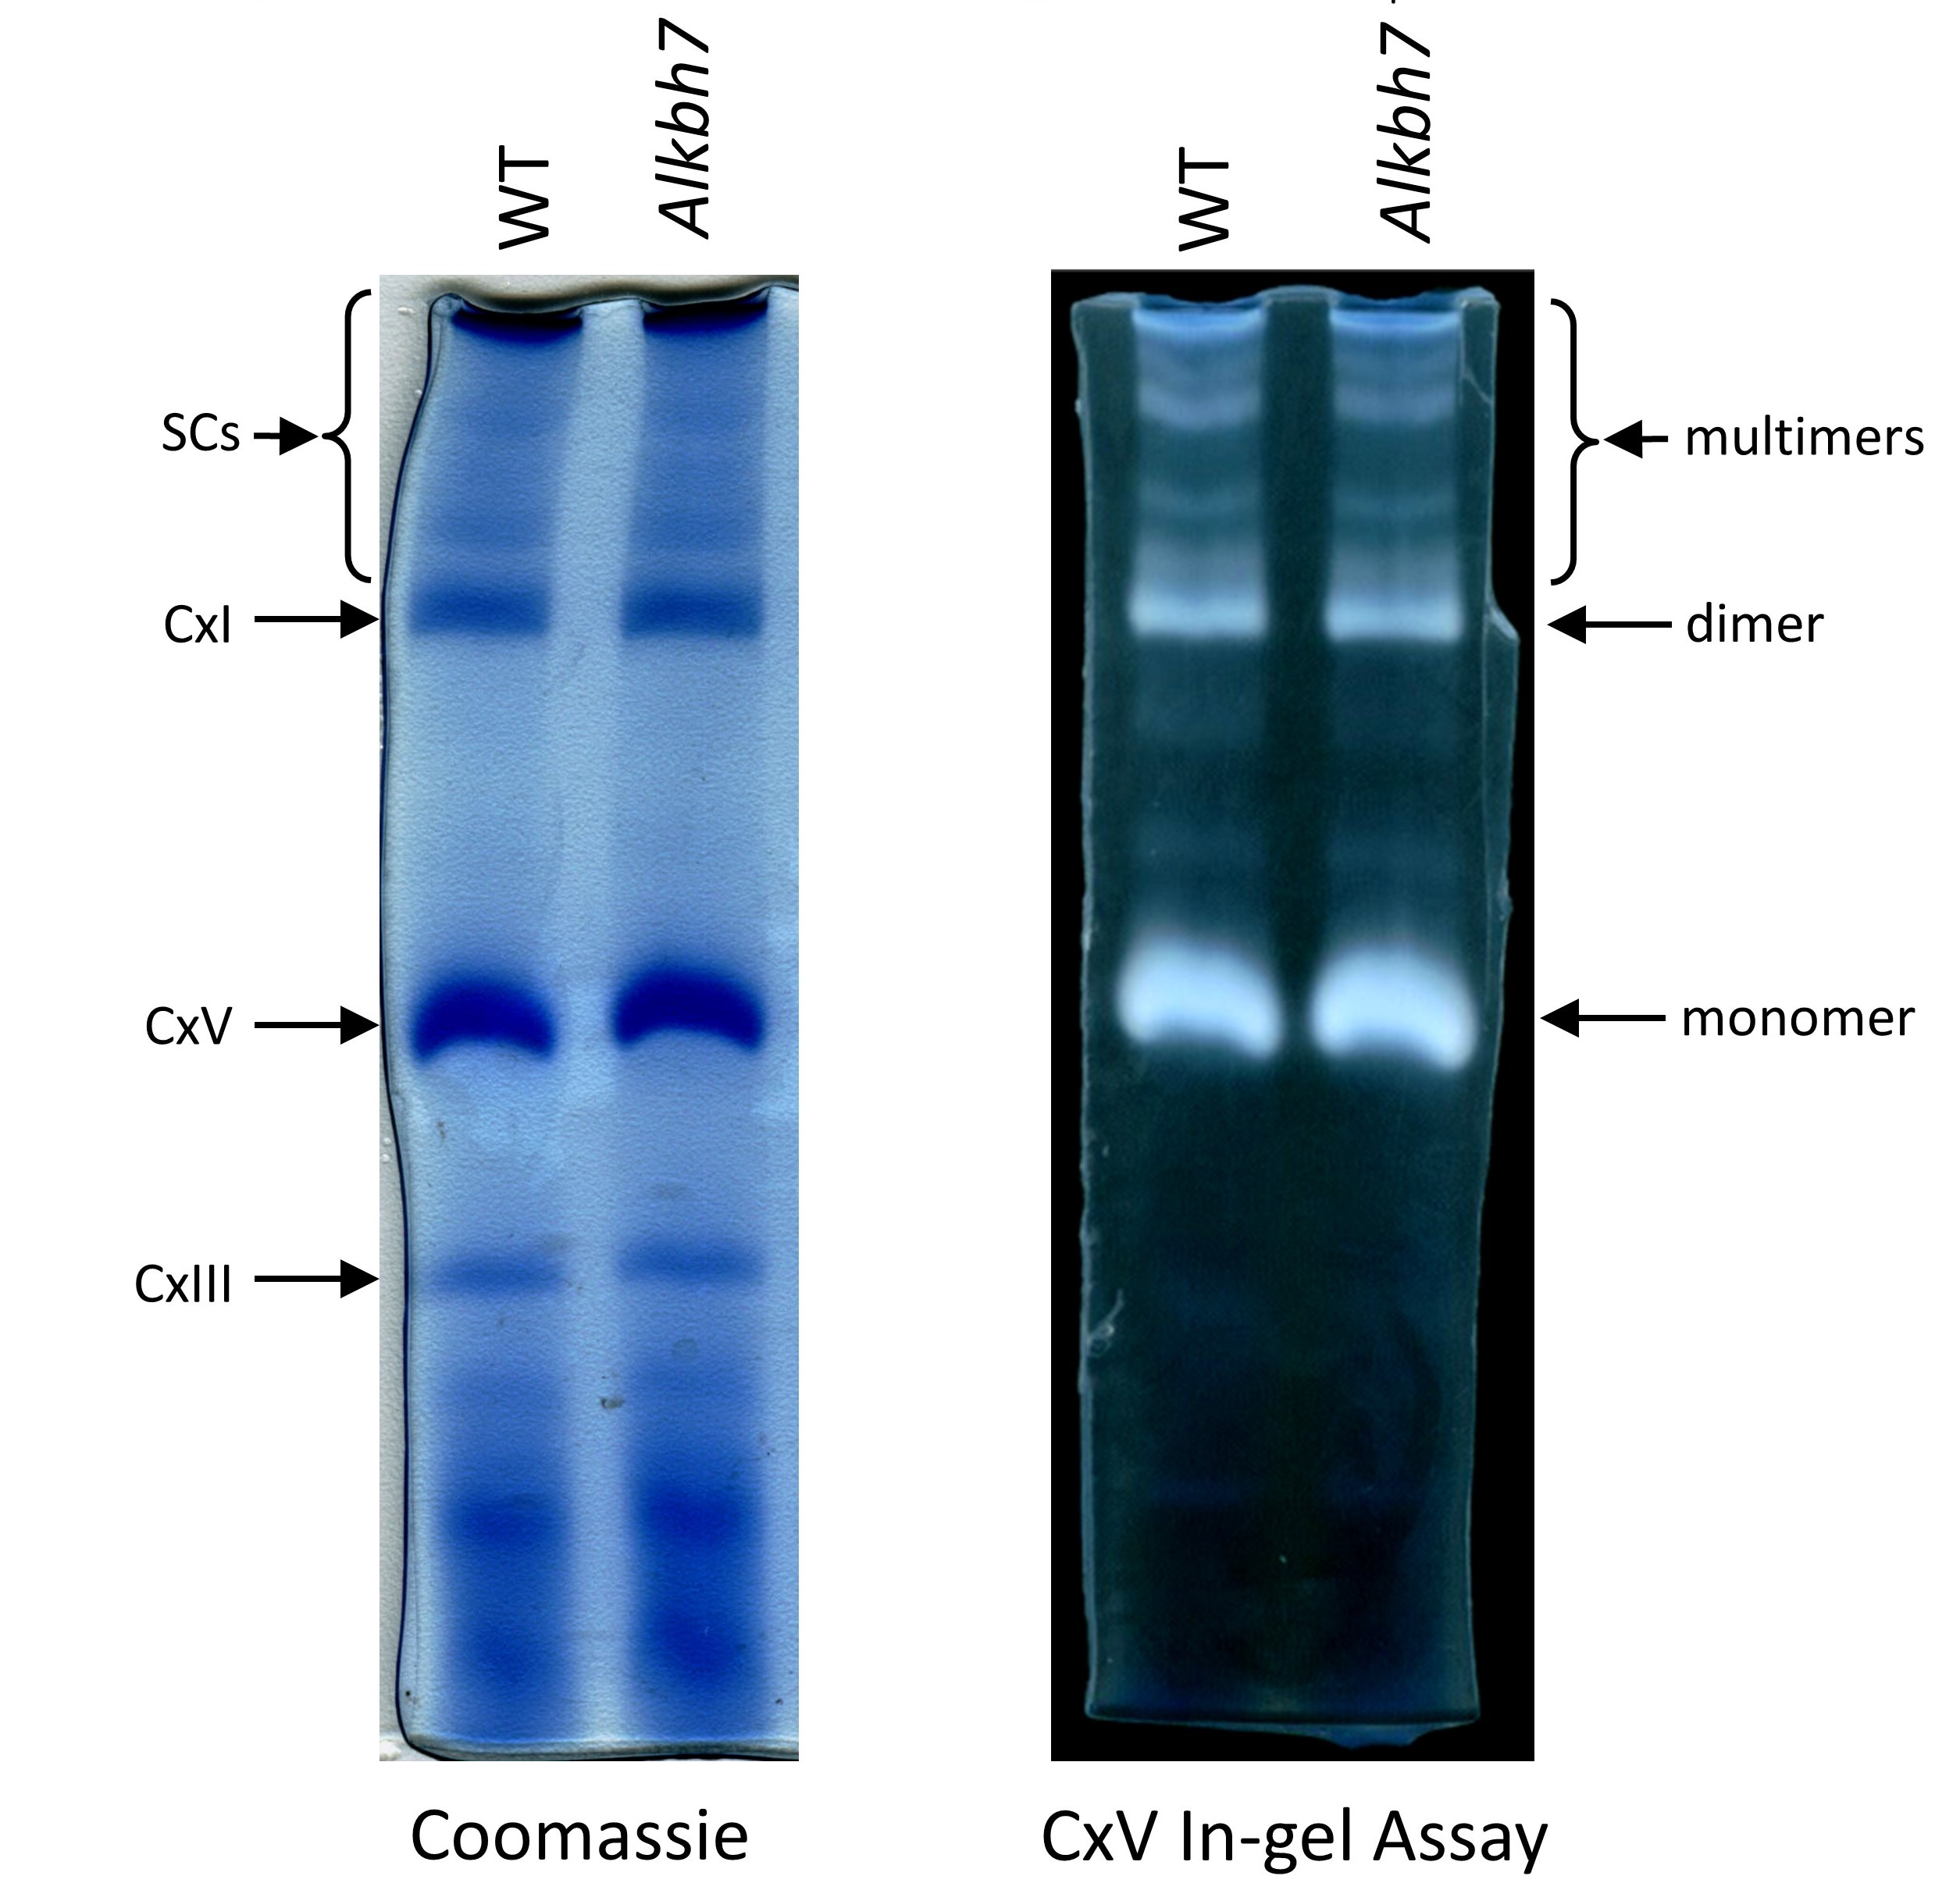

Supplement: supp [file elife-58573-supp-v1.zip › elife_poa_e58573_Figure_5_figure_supplement_3.jpg]

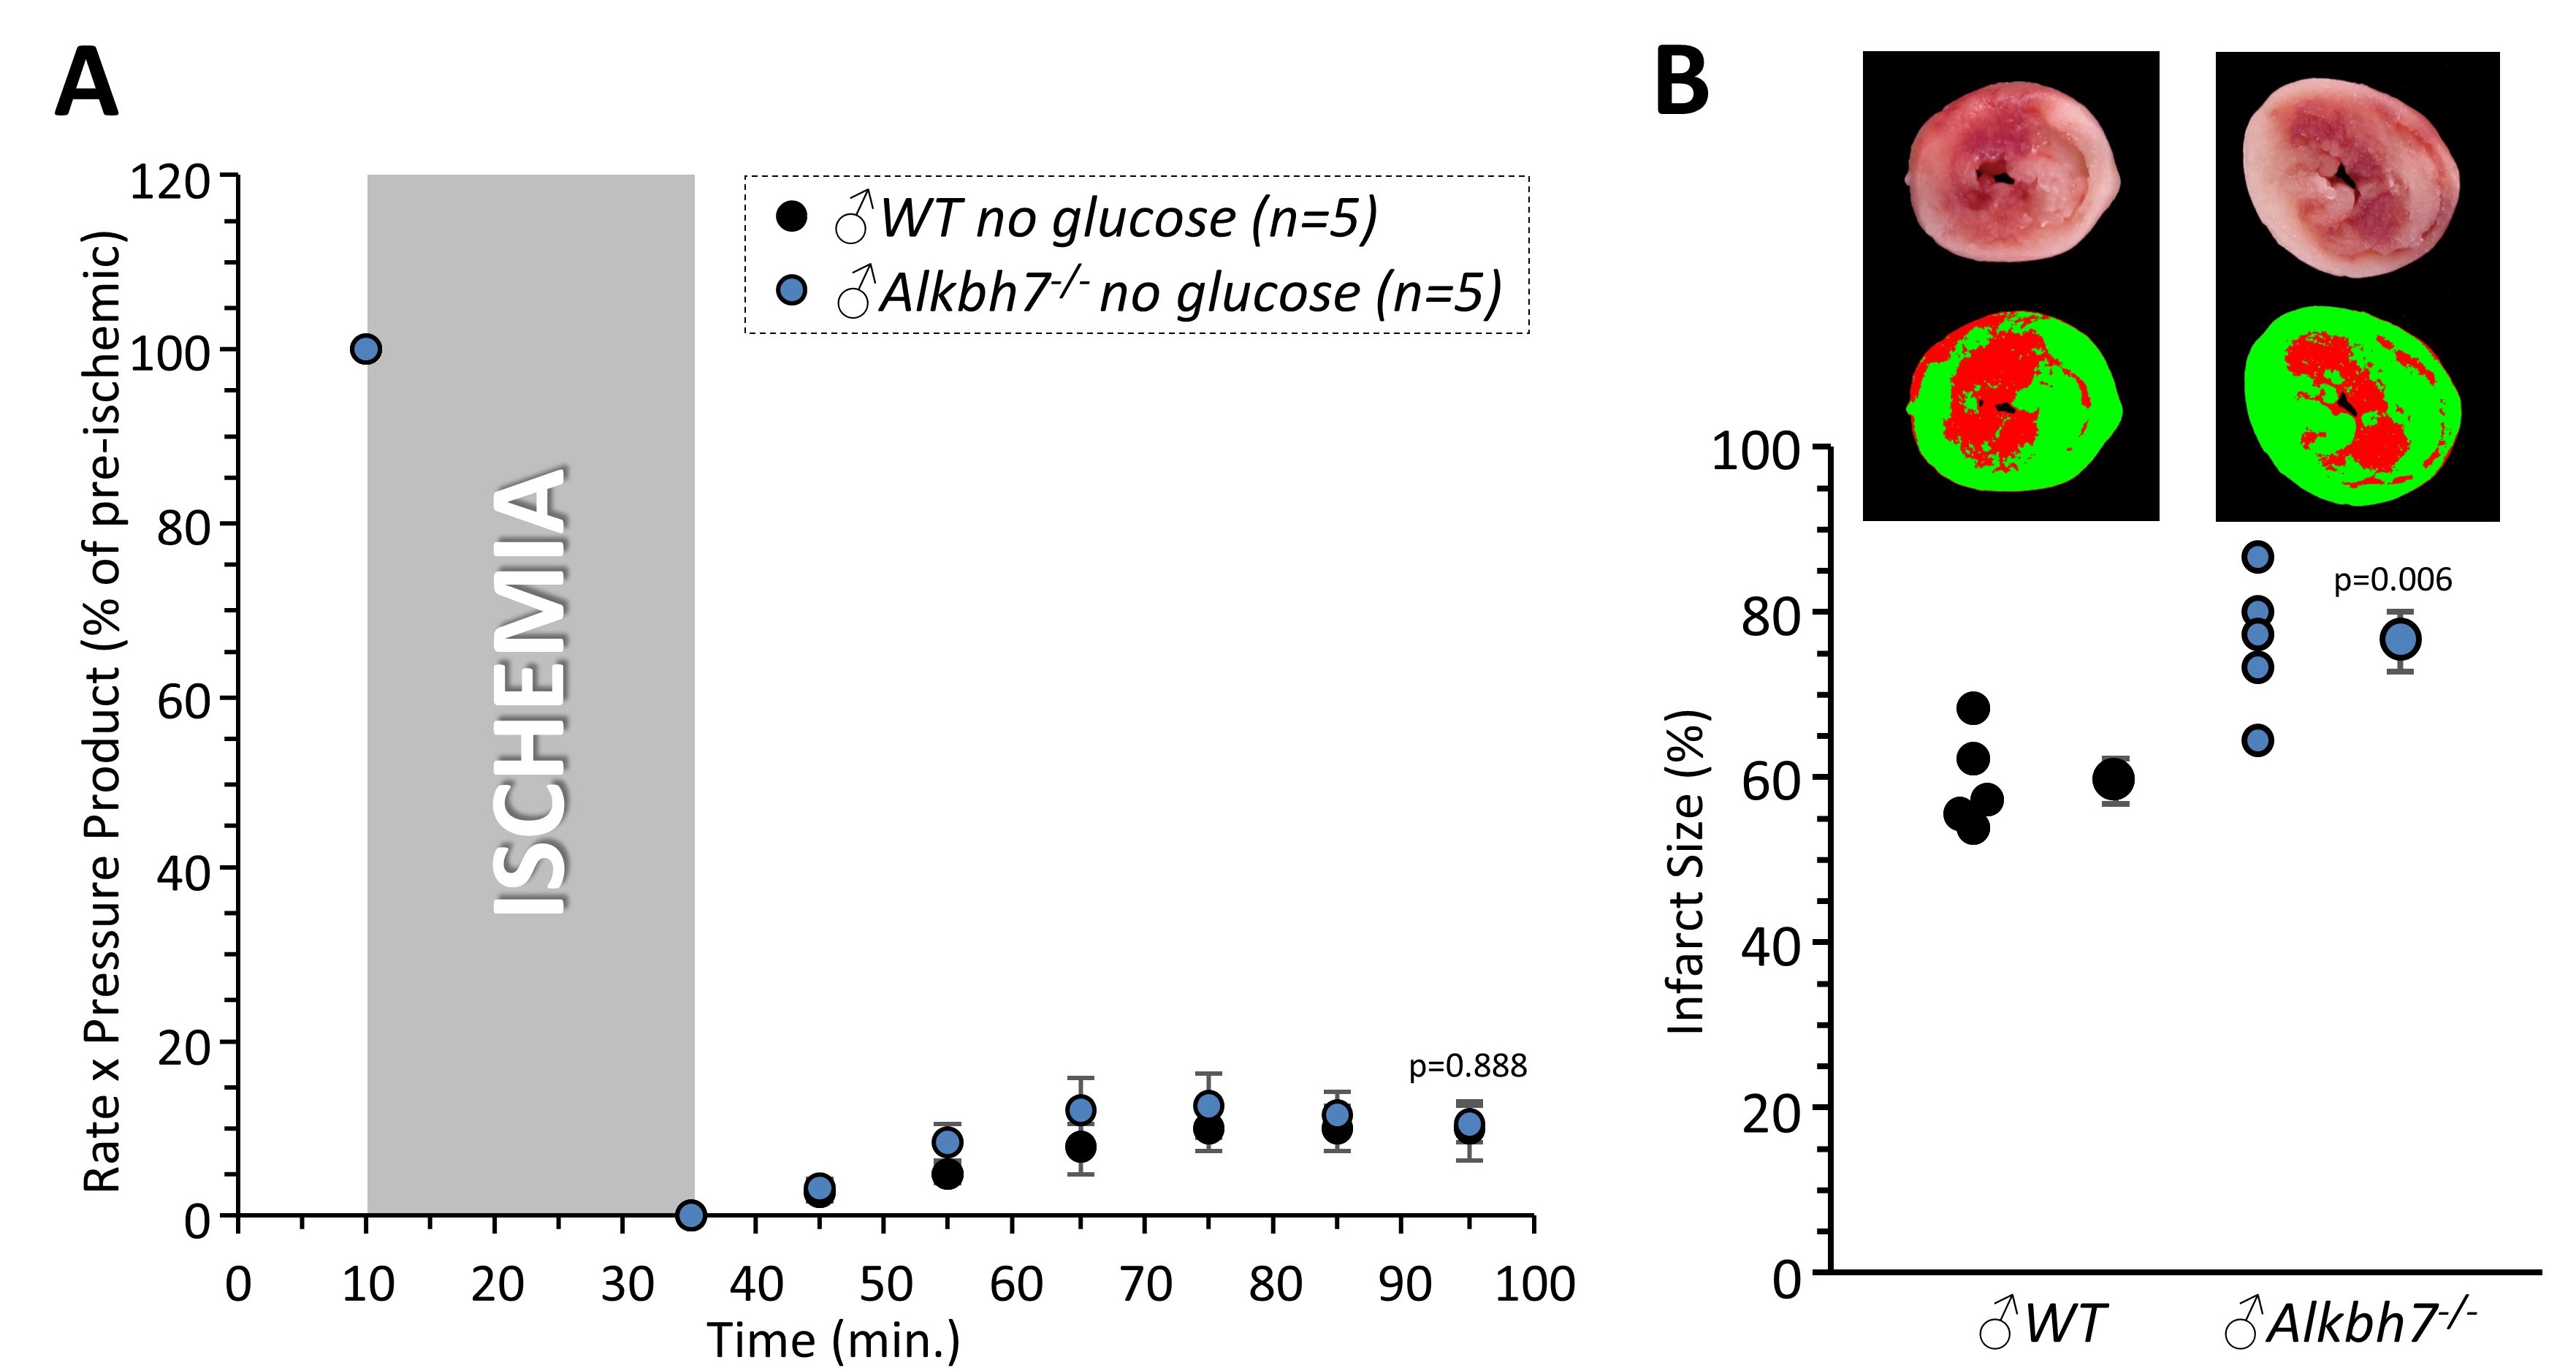

Supplement: supp [file elife-58573-supp-v1.zip › elife_poa_e58573_Figure_6_figure_supplement_1.jpg]
